# Supplementary material for: Molecular profiling of pre- and post- 5-azacytidine myelodysplastic syndrome samples identifies predictors of response
Source: Front Oncol. 2024 Sep 23;14:1438052. doi: 10.3389/fonc.2024.1438052 (PMC11456566; doi:10.3389/fonc.2024.1438052)
Supplement: Supplementary Table 1 — Clinical and biological characteristics of the patients treated with 5-azacytidine. [file Table1.xlsx]

## Sheet: Sheet1
Supplementary Table 1. Clinical, biological and follow-up characteristics of the patients treated with 5-Azacytidine
Sample Pair	ID	Treatment	Treatment duration between pre-Aza and during Aza (months)	Age (years)	Sex (male/female)	MDS/AML	WHO 2016	Karyotype	IPSS-R Karyo Risk	IPSS-R Score	IPSS-R Catergory	Hemoglobin (g/dL)	Platelet Count (X10E9/L)	ANC (X10E9/L)	WBC (10E9/L)	Bone Marrow Blast (%)	Blast Response	Hematological Response
1	8711	PRE-AZA	--	64.4463	F	MDS	MDS-EB-2	46,XX[15]	Good	5	High	9.7	112	1.6	2.9	11
	9143	POST-AZA	4					46,XX[15]	Good			9.7	170	2.4	4.1	11	NR	R
2	8934	PRE-AZA	--	72.8706	F	s-AML	AML-MRC	46,XX,de(5)(q31q35)[12]	--	--	--	8.6	54	0.1	1.2	70
	9517	POST-AZA	6					46,XX,de(5)(q31q35)[8]/45,XX,sl,-13[3]	--			7.7	9	0.1	4.3	56	NR	NR
3	9067	PRE-AZA	--	64.4545	M	MDS	MDS-EB-1	46,XY[25]	Good	5	High	7.6	68	3.9	5.5	5
	9674	POST-AZA	6					46,XY[21]	Good			13.6	151	1.1	3.3	1.3	R	R
4	9401	PRE-AZA	--	78.2423	M	MDS	MDS-EB-2	46,XY[22]	Good	4.5	Intermediate	10.6	470	0.6	2.1	15
	10214	POST-AZA	6					46,XY[21]	Good			10	100	0.7	2.4	13	NR	NR
5	9844	PRE-AZA	--	76.3149	F	MDS	MDS-EB-2	46,XX[12]	Good	5	High	8.6	35	1.9	3.3	7.6
	10333	POST-AZA	6					46,XX[22]	Good			12	156	4.7	7.2	2	R	R
6	9991	PRE-AZA	--	62.078	F	MDS	MDS-EB-1	47,XX,+8[12]/46,XX[10]	Intermediate	6	High	8.6	53	0.6	3.7	7.6
	10554	POST-AZA	6					46,XX[22]	Good			11	330	2.5	4.6	0	R	R
7	10236	PRE-AZA	--	85.4428	F	MDS	MDS-EB-1	46,XX[22]	Good	5.5	High	7.4	19	2.2	3.4	9
	10708	POST-AZA	6					46,XX[21]	Good			7.2	30	1.5	2.2	7.2	NR	NR
8	10067	PRE-AZA	--	76.7474	F	MDS	MDS-EB-1	47,XX,del(5)(q31q35),+8[5]/46,XX[10]	Intermediate	5	High	10.1	25	2.5	4.9	6.6
	10370	POST-AZA	4					46,XX[20]	Good			8.7	187	1.3	2.5	1	R	NR
9	10439	PRE-AZA	--	67.1458	M	s-AML	AML-MRC	46,XY[20]	--	--	--	9	211	NA	36.6	32
	11047	POST-AZA	8					46,XY[13]	--			10.4	214	NA	12.0	30	NR	U
10	9764	PRE-AZA	--	71.373	F	MDS	MDS-MLD	46,XX,del(5)(q31q35)[2]/47,XX,sl,+del(1)(p21p36)del(7)(21q35)[15]/47,XX,sldel(7)(q21q35)+8[2]	Very poor	4	Intermediate	10.5	220	1.1	2.8	2
	10746	POST-AZA	12					50,XX,-4,del(5)(q31q35),del(7)(q21q35),+8,add(11)(p13),+11,+13,+16,+22[6]/ 46,XX[7]	Very poor			13	118	1.2	3	2	NR	R
11	10798	PRE-AZA	--	79.2608	M	s-AML	AML-MRC	46,XY[18]	--	--	--	8.3	247	9.1	15.7	25
	11066	POST-AZA	4					46,XY[15]	--			NA	NA	NA	NA	5	R	U
12	10752	PRE-AZA	--	64.8077	M	MDS	MDS-MLD	47,XY,+8[15]/46,XY[6]	Intermediate	5	High	14.6	80	0.6	2.3	5
	12082	POST-AZA	8					NA	NA			13.4	32	0.7	2.5	5	NR	NR
13	11161	PRE-AZA	--	65.243	M	MDS	MDS-EB-2	46,XY[17]	Good	5	High	9.2	32	2.4	6.9	6
	12183	POST-AZA	4					46,XY[18]	Good			14.9	343	4.9	6.8	15	NR	R
14	9830	PRE-AZA	--	49.1691	F	MDS	MDS-EB-2	46,XX[16]	Good	U	U	NA	NA	NA	NA	10
	10195	POST-AZA	4					46,XX[16]	Good			NA	NA	NA	NA	0	R	U
* MDS-MLD: Myelodysplastic syndromes with multilinage dysplasia; MDS-EB-1: Myelodysplastic syndromes with excess of blasts 1; MDS-EB-2: Myelodysplastic syndromes with excess of blasts 2; AML-MRC: Acute myeloid leukemia with myelodysplasia-related changes; NA: Not available; U: Undefined; R: Responder; NR: Non-responder
