# Supplementary material for: Molecular profiling of pre- and post- 5-azacytidine myelodysplastic syndrome samples identifies predictors of response
Source: Front Oncol. 2024 Sep 23;14:1438052. doi: 10.3389/fonc.2024.1438052 (PMC11456566; doi:10.3389/fonc.2024.1438052)
Supplement: Supplementary Table 2 — Myeloid-related genes included in the NGS panel. [file Table2.xlsx]

## Sheet: Sheet1
Supplementary Table 2. Myeloid-related genes included in the NGS panel
Signaling pathway	RNA splicing	DNA Methylation	Transcription	Cohesin Complex	Telomerase	Cromatine modification	Others
CSF3R	LUC7L2	DNMT3A	AEBP2	CTCF	TERC	ASXL1	GCAT
EGFR	SF1	IDH1	ATRX	RAD21	TERT	EP300	BCAS1
FLT3	SF3A1	IDH2	BCOR	SMC1A		EZH2	WASF3
GNAS	SF3B1	TET2	BCORL1	SMC3		KDM6A
HRAS	SFPQ		CALR	STAG1		KMT2A
JAK1	SRSF2		CBFb	STAG2		KMT2D
JAK2	U2AF1		CEBPA			ARID2
JAK3	USB1		CREBBP			SETD2
JKAMP	ZRSR2		CTNNA1
KIT			CUX1
KRAS			UBR5
MPL			ETV6
MTOR			GATA1
NF1			GATA2
NRAS			IKZF1
NTRK1			IRF1
PDGFRA			JARID2
PDGFRB			MECOM
RET			NOTCH1
TCL1B			NPM1
SPARC			PBRM1
PTEN			PHF19
PTPN1			PHF6
PTPN11			RPS14
PHLPP1			RUNX1
BCR			SALL4
SETBP1			SBDS
CBL			SUZ12
UMODL1			TIMM50
TYK2			TNFAIP3
GNB1			TP53
BRAF			WT1
ABL1			EIF2AK2
NUP98			NR2F6
ENG			RARA
CSNK1A1
BMI1
CDH23
CDH3
CDK2
CDKN2A
CBLB
CBLC
FBXW7
TGM2
IL3
SH2B3
CD177
CDH13
G3BP1
