# Supplementary material for: Molecular profiling of pre- and post- 5-azacytidine myelodysplastic syndrome samples identifies predictors of response
Source: Front Oncol. 2024 Sep 23;14:1438052. doi: 10.3389/fonc.2024.1438052 (PMC11456566; doi:10.3389/fonc.2024.1438052)
Supplement: Supplementary Table 3 — Description of all mutations presented in MDS HSPCs. [file Table3.xlsx]

## Sheet: Sheet1
Supplementary Table 3. Detailed description of all mutations presented in CD34 positive cells
CD34	Sample	Sample	Gene	Chr	Start	End	Ref	Alt	Total depth	Reference depth	Alt depth	FREQ	Function	Exonic consequence	AA change & Transcript	cosmic70	avsnp144	1000g2015aug_all	esp6500siv2_all	ExAC_ALL	SIFT_pred_	Polyphen2_HDIV_pred_	Polyphen2_HVAR_pred_	MutationAssessor_pred_	clinvar_20150629
Positive	1_POST	9143_L12_MO_CD34p_A	AEBP2	chr12	19646908	19646908	C	T	573	473	98	17.13	exonic	stopgain	NM_001114176:c.C1162T:p.R388X	NA	NA	NA	NA	NA	.	.	.	.	NA
Positive	1_POST	9143_L12_MO_CD34p_A	RUNX1	chr21	36259171	36259171	C	G	429	204	224	52.34	exonic	nonsynonymous SNV	NM_001001890:c.G239C:p.R80P	NA	NA	NA	NA	NA	D	D	D	M	NA
Positive	1_POST	9143_L12_MO_CD34p_A	RET	chr10	43606670	43606670	G	C	565	286	277	49.11	exonic	nonsynonymous SNV	NM_020630:c.G1279C:p.V427L	NA	NA	NA	NA	NA	T	P	B	L	NA
Positive	1_POST	9143_L12_MO_CD34p_A	SRSF2	chr17	74732959	74732959	G	A	267	122	141	53.61	exonic	nonsynonymous SNV	NM_001195427:c.C284T:p.P95L	ID=COSM146288,COSM211506,COSM211028;OCCURENCE=53(haematopoietic_and_lymphoid_tissue)	rs751713049	NA	NA	8.269e-05	T	P	P	M	NA
Positive	1_POST	9143_L12_MO_CD34p_A	STAG2	chrX	123220456	123220456	G	A	1113	976	136	12.23	exonic	stopgain	NM_006603:c.G3113A:p.W1038X	NA	NA	NA	NA	NA	.	.	.	.	NA
Positive	1_POST	9143_L12_MO_CD34p_A	GATA2	chr3	128205729	128205729	A	-	695	382	313	45.04	exonic	frameshift deletion	NM_001145662:c.146delT:p.F49fs	NA	NA	NA	NA	NA	NA	NA	NA	NA	NA
Positive	1_PRE	8711_L12_MO_CD34p_A	AEBP2	chr12	19646908	19646908	C	T	430	357	69	16.08	exonic	stopgain	NM_001114176:c.C1162T:p.R388X	NA	NA	NA	NA	NA	.	.	.	.	NA
Positive	1_PRE	8711_L12_MO_CD34p_A	RUNX1	chr21	36259171	36259171	C	G	272	131	140	51.66	exonic	nonsynonymous SNV	NM_001001890:c.G239C:p.R80P	NA	NA	NA	NA	NA	D	D	D	M	NA
Positive	1_PRE	8711_L12_MO_CD34p_A	RET	chr10	43606670	43606670	G	C	376	196	180	47.87	exonic	nonsynonymous SNV	NM_020630:c.G1279C:p.V427L	NA	NA	NA	NA	NA	T	P	B	L	NA
Positive	1_PRE	8711_L12_MO_CD34p_A	SRSF2	chr17	74732959	74732959	G	A	232	101	130	56.28	exonic	nonsynonymous SNV	NM_001195427:c.C284T:p.P95L	ID=COSM146288,COSM211506,COSM211028;OCCURENCE=53(haematopoietic_and_lymphoid_tissue)	rs751713049	NA	NA	8.269e-05	T	P	P	M	NA
Positive	1_PRE	8711_L12_MO_CD34p_A	STAG2	chrX	123220456	123220456	G	A	885	765	118	13.35	exonic	stopgain	NM_006603:c.G3113A:p.W1038X	NA	NA	NA	NA	NA	.	.	.	.	NA
Positive	1_PRE	8711_L12_MO_CD34p_A	GATA2	chr3	128205729	128205729	A	-	458	254	203	44.42	exonic	frameshift deletion	NM_001145662:c.146delT:p.F49fs	NA	NA	NA	NA	NA	NA	NA	NA	NA	NA
Positive	10_POST	10746_L12_MO_CD34p_A	TP53	chr17	7577124	7577124	C	T	871	614	248	28.74	exonic	nonsynonymous SNV	NM_001126115:c.G418A:p.V140M	ID=COSM10891,COSM99950,COSM3388172,COSM1645249;OCCURENCE=1(endometrium),14(ovary),1(soft_tissue),16(large_intestine),2(kidney),4(pancreas),2(liver),2(urinary_tract),10(breast),6(oesophagus),1(vulva),1(bone),2(upper_aerodigestive_tract),4(stomach),6(central_nervous_system),5(haematopoietic_and_lymphoid_tissue),6(lung)	rs121912657	NA	NA	2.683e-05	D	D	D	M	CLINSIG=pathogenic|unknown,unknown;CLNDBN=Li-Fraumeni_syndrome_1|Hereditary_cancer-predisposing_syndrome,Hereditary_cancer-predisposing_syndrome;CLNREVSTAT=no_assertion_criteria_provided|criteria_provided\x2c_single_submitter,criteria_provided\x2c_single_submitter;CLNACC=RCV000013152.21|RCV000164988.1,RCV000165304.1;CLNDSDB=GeneReviews:MedGen:OMIM:Orphanet|MedGen:SNOMED_CT,MedGen:SNOMED_CT;CLNDSD…
Positive	10_POST	10746_L12_MO_CD34p_A	TP53	chr17	7578433	7578433	G	T	1275	904	369	28.99	exonic	stopgain	NM_001126115:c.C101A:p.S34X	ID=COSM11508;OCCURENCE=1(ovary),1(large_intestine),3(liver),3(upper_aerodigestive_tract)	NA	NA	NA	NA	.	.	.	.	NA
Positive	10_POST	10746_L12_MO_CD34p_A	TGM2	chr20	36769764	36769764	G	A	739	412	316	43.41	exonic	nonsynonymous SNV	NM_004613:c.C1019T:p.S340L	NA	NA	NA	NA	NA	D	D	P	L	NA
Positive	10_POST	10746_L12_MO_CD34p_A	CUX1	chr7	101870887	101870887	C	T	722	390	328	45.68	exonic	nonsynonymous SNV	NM_001202543:c.C3404T:p.P1135L	NA	NA	NA	NA	2.475e-05	D	D	P	L	NA
Positive	10_PRE	9764_L12_MO_34p_A	TP53	chr17	7577124	7577124	C	T	317	171	142	45.37	exonic	nonsynonymous SNV	NM_001126115:c.G418A:p.V140M	ID=COSM10891,COSM99950,COSM3388172,COSM1645249;OCCURENCE=1(endometrium),14(ovary),1(soft_tissue),16(large_intestine),2(kidney),4(pancreas),2(liver),2(urinary_tract),10(breast),6(oesophagus),1(vulva),1(bone),2(upper_aerodigestive_tract),4(stomach),6(central_nervous_system),5(haematopoietic_and_lymphoid_tissue),6(lung)	rs121912657	NA	NA	2.683e-05	D	D	D	M	CLINSIG=pathogenic|unknown,unknown;CLNDBN=Li-Fraumeni_syndrome_1|Hereditary_cancer-predisposing_syndrome,Hereditary_cancer-predisposing_syndrome;CLNREVSTAT=no_assertion_criteria_provided|criteria_provided\x2c_single_submitter,criteria_provided\x2c_single_submitter;CLNACC=RCV000013152.21|RCV000164988.1,RCV000165304.1;CLNDSDB=GeneReviews:MedGen:OMIM:Orphanet|MedGen:SNOMED_CT,MedGen:SNOMED_CT;CLNDSD…
Positive	10_PRE	9764_L12_MO_34p_A	TP53	chr17	7578433	7578433	G	T	502	278	224	44.62	exonic	stopgain	NM_001126115:c.C101A:p.S34X	ID=COSM11508;OCCURENCE=1(ovary),1(large_intestine),3(liver),3(upper_aerodigestive_tract)	NA	NA	NA	NA	.	.	.	.	NA
Positive	10_PRE	9764_L12_MO_34p_A	TGM2	chr20	36769764	36769764	G	A	327	168	155	47.99	exonic	nonsynonymous SNV	NM_004613:c.C1019T:p.S340L	NA	NA	NA	NA	NA	D	D	P	L	NA
Positive	10_PRE	9764_L12_MO_34p_A	CUX1	chr7	101870887	101870887	C	T	248	48	198	80.49	exonic	nonsynonymous SNV	NM_001202543:c.C3404T:p.P1135L	NA	NA	NA	NA	2.475e-05	D	D	P	L	NA
Positive	11_POST	11066_L12_MO_34p_A	SRSF2	chr17	74732959	74732959	G	A	190	120	68	35.98	exonic	nonsynonymous SNV	NM_001195427:c.C284T:p.P95L	ID=COSM146288,COSM211506,COSM211028;OCCURENCE=53(haematopoietic_and_lymphoid_tissue)	rs751713049	NA	NA	8.269e-05	T	P	P	M	NA
Positive	11_POST	11066_L12_MO_34p_A	IDH2	chr15	90631934	90631934	C	T	109	96	12	6.47	exonic	nonsynonymous SNV	NM_001290114:c.G29A:p.R10Q	ID=COSM41590;OCCURENCE=417(haematopoietic_and_lymphoid_tissue),1(NS)	rs121913502	NA	NA	9.884e-05	D	D	D	H	CLINSIG=pathogenic;CLNDBN=D-2-hydroxyglutaric_aciduria_2;CLNREVSTAT=no_assertion_criteria_provided;CLNACC=RCV000015831.23;CLNDSDB=MedGen:OMIM:Orphanet;CLNDSDBID=C3150909:613657:ORPHA79315
Positive	11_POST	11066_L12_MO_34p_A	SF3B1	chr2	198267359	198267359	C	G	252	147	104	41.27	exonic	nonsynonymous SNV	NM_012433:c.G1998C:p.K666N	ID=COSM132937;OCCURENCE=9(haematopoietic_and_lymphoid_tissue),1(liver)	rs377023736	NA	7.7e-05	5.77e-05	D	D	D	H	NA
Positive	11_PRE	10798_L12_MO_34p	SRSF2	chr17	74732959	74732959	G	A	406	187	216	53.6	exonic	nonsynonymous SNV	NM_001195427:c.C284T:p.P95L	ID=COSM146288,COSM211506,COSM211028;OCCURENCE=53(haematopoietic_and_lymphoid_tissue)	rs751713049	NA	NA	8.269e-05	T	P	P	M	NA
Positive	11_PRE	10798_L12_MO_34p	IDH2	chr15	90631934	90631934	C	T	341	318	22	11.11	exonic	nonsynonymous SNV	NM_001290114:c.G29A:p.R10Q	ID=COSM41590;OCCURENCE=417(haematopoietic_and_lymphoid_tissue),1(NS)	rs121913502	NA	NA	9.884e-05	D	D	D	H	CLINSIG=pathogenic;CLNDBN=D-2-hydroxyglutaric_aciduria_2;CLNREVSTAT=no_assertion_criteria_provided;CLNACC=RCV000015831.23;CLNDSDB=MedGen:OMIM:Orphanet;CLNDSDBID=C3150909:613657:ORPHA79315
Positive	11_PRE	10798_L12_MO_34p	SF3B1	chr2	198267359	198267359	C	G	590	313	268	46.13	exonic	nonsynonymous SNV	NM_012433:c.G1998C:p.K666N	ID=COSM132937;OCCURENCE=9(haematopoietic_and_lymphoid_tissue),1(liver)	rs377023736	NA	7.7e-05	5.77e-05	D	D	D	H	NA
Positive	12_POST	12082_L12_MO_34p	SRSF2	chr17	74732959	74732959	G	T	307	163	142	46.56	exonic	nonsynonymous SNV	NM_001195427:c.C284A:p.P95H	ID=COSM211029,COSM211505,COSM211504;OCCURENCE=80(haematopoietic_and_lymphoid_tissue)	rs751713049	NA	NA	0.0001	T	D	D	M	NA
Positive	12_PRE	10752_L12_MO_34p	SRSF2	chr17	74732959	74732959	G	T	259	137	119	46.48	exonic	nonsynonymous SNV	NM_001195427:c.C284A:p.P95H	ID=COSM211029,COSM211505,COSM211504;OCCURENCE=80(haematopoietic_and_lymphoid_tissue)	rs751713049	NA	NA	0.0001	T	D	D	M	NA
Positive	12_PRE	10752_L12_MO_34p	STAG2	chrX	123171416	123171416	C	T	245	204	40	16.39	exonic	stopgain	NM_006603:c.C328T:p.R110X	ID=COSM3405916,COSM1738074;OCCURENCE=1(central_nervous_system)	NA	NA	NA	NA	.	.	.	.	NA
Positive	13_POST	12183_L12_MO_34p_A	DNMT3A	chr2	25457242	25457242	C	T	187	169	17	9.09	exonic	nonsynonymous SNV	NM_153759:c.G2078A:p.R693H	ID=COSM52944,COSM442676;OCCURENCE=1(breast),410(haematopoietic_and_lymphoid_tissue)	rs147001633	NA	0.0007	0.0005	D	P	B	M	NA
Positive	13_PRE	11161_L12_MO_CD34p_A	NPM1	chr5	170837543	170837543	-	TCTG	158	96	37	23.72	exonic	frameshift insertion	NM_199185:c.772_773insTCTG:p.L258fs	ID=COSM158604;OCCURENCE=27(haematopoietic_and_lymphoid_tissue)	rs758959453	NA	NA	8.396e-06	NA	NA	NA	NA	NA
Positive	13_PRE	11161_L12_MO_CD34p_A	DNMT3A	chr2	25457242	25457242	C	T	336	191	145	43.15	exonic	nonsynonymous SNV	NM_153759:c.G2078A:p.R693H	ID=COSM52944,COSM442676;OCCURENCE=1(breast),410(haematopoietic_and_lymphoid_tissue)	rs147001633	NA	0.0007	0.0005	D	P	B	M	NA
Positive	13_PRE	11161_L12_MO_CD34p_A	PTPN11	chr12	112926885	112926885	C	T	550	501	46	8.41	exonic	nonsynonymous SNV	NM_002834:c.C1505T:p.S502L	ID=COSM13023;OCCURENCE=1(lung),3(haematopoietic_and_lymphoid_tissue)	rs397507544	NA	NA	NA	D	D	D	M	CLINSIG=pathogenic|pathogenic;CLNDBN=Rasopathy|Noonan_syndrome_1;CLNREVSTAT=criteria_provided\x2c_single_submitter|criteria_provided\x2c_single_submitter;CLNACC=RCV000033544.4|RCV000037619.2;CLNDSDB=MedGen|GeneReviews:MedGen:OMIM:Orphanet;CLNDSDBID=CN166718|NBK1124:C0041409:163950:ORPHA648
Positive	13_PRE	11161_L12_MO_CD34p_A	RPS14	chr5	149823879	149823879	C	G	592	482	107	18.17	exonic	nonsynonymous SNV	NM_001025070:c.G426C:p.R142S	NA	NA	NA	NA	NA	T	B	P	M	NA
Positive	2_POST	9517_L12_MO_CD34p_A	MTOR	chr1	11316102	11316102	T	G	103	61	40	39.6	exonic	nonsynonymous SNV	NM_004958:c.A652C:p.I218L	NA	NA	NA	NA	NA	T	B	B	L	NA
Positive	2_POST	9517_L12_MO_CD34p_A	KRAS	chr12	25398284	25398284	C	T	153	142	11	7.19	exonic	nonsynonymous SNV	NM_004985:c.G35A:p.G12D	ID=COSM1135366,COSM521;OCCURENCE=1(salivary_gland),15(oesophagus),104(stomach),215(haematopoietic_and_lymphoid_tissue),95(peritoneum),37(thyroid),6(central_nervous_system),1257(lung),350(biliary_tract),18(liver),95(small_intestine),1(genital_tract),2974(pancreas),3(eye),23(cervix),33(upper_aerodigestive_tract),20(gastrointestinal_tract_(site_indeterminate)),3(kidney),23(urinary_tract),17(NS),23(s…	rs121913529	NA	NA	1.976e-05	D	P	B	M	CLINSIG=Pathogenic_Pathogenic_Pathogenic_Pathogenic_Pathogenic_Pathogenic_Pathogenic_Pathogenic_Pathogenic_Pathogenic_Likely_pathogenic_Pathogenic_Likely_pathogenic_Pathogenic_Pathogenic;CLNDBN=Carcinoma_of_pancreas_Neoplasm_of_stomach_Epidermal_nevus_Nevus_sebaceous_Epidermal_nevus_syndrome_Juvenile_myelomonocytic_leukemia_RAS-associated_autoimmune_leukoproliferative_disorder_Non-small_cell_lung…
Positive	2_POST	9517_L12_MO_CD34p_A	RUNX1	chr21	36252865	36252865	C	T	77	54	23	29.87	exonic	nonsynonymous SNV	NM_001001890:c.G416A:p.R139Q	ID=COSM4385177,COSM36055;OCCURENCE=1(breast),15(haematopoietic_and_lymphoid_tissue)	NA	NA	NA	NA	D	D	D	M	CLINSIG=Likely_pathogenic;CLNDBN=Familial_platelet_disorder_with_associated_myeloid_malignancy;CLNACC=RCV000477937.1;CLNDSDB=MedGen\OMIM\Orphanet;CLNDSDBID=C1832388\601399\ORPHA71290
Positive	2_POST	9517_L12_MO_CD34p_A	NRAS	chr1	115258745	115258745	C	G	158	133	24	15.29	exonic	nonsynonymous SNV	NM_002524:c.G37C:p.G13R	ID=COSM569;OCCURENCE=1(endometrium),37(skin),14(large_intestine),1(breast),1(pleura),1(urinary_tract),3(soft_tissue),9(NS),3(autonomic_ganglia),1(eye),1(genital_tract),1(salivary_gland),1(thyroid),75(haematopoietic_and_lymphoid_tissue),4(stomach),4(biliary_tract)	rs121434595	NA	NA	NA	D	D	D	M	CLINSIG=Pathogenic_Pathogenic_Likely_pathogenic_Likely_pathogenic_Pathogenic_Likely_pathogenic_Likely_pathogenic_Likely_pathogenic_Likely_pathogenic_Likely_pathogenic_Likely_pathogenic_Likely_pathogenic;CLNDBN=Carcinoma_of_colon_Giant_pigmented_hairy_nevus_Medulloblastoma_Transitional_cell_carcinoma_of_the_bladder_Malignant_melanoma_Multiple_myeloma_Adenocarcinoma_of_stomach_Myelodysplastic_syndr…
Positive	2_PRE	8934_L12_MO_CD34p_A	KRAS	chr12	25398284	25398284	C	T	548	536	10	1.83	exonic	nonsynonymous SNV	NM_004985:c.G35A:p.G12D	ID=COSM521,COSM1135366;OCCURENCE=1(salivary_gland),171(endometrium),265(ovary),20(soft_tissue),19(urinary_tract),1(kidney),2323(pancreas),15(liver),3(eye),22(prostate),321(biliary_tract),6237(large_intestine),18(breast),24(skin),58(small_intestine),25(upper_aerodigestive_tract),10(oesophagus),4(central_nervous_system),93(stomach),2(testis),19(cervix),114(haematopoietic_and_lymphoid_tissue),15(gas…	rs121913529	NA	NA	1.976e-05	D	P	B	M	CLINSIG=pathogenic|pathogenic|pathogenic|pathogenic|pathogenic,pathogenic,pathogenic|pathogenic|pathogenic|pathogenic|pathogenic|pathogenic|pathogenic|pathogenic|pathogenic;CLNDBN=Carcinoma_of_pancreas|Nevus_sebaceous|Juvenile_myelomonocytic_leukemia|Non-small_cell_lung_cancer|Rasopathy,Non-small_cell_lung_cancer,Carcinoma_of_pancreas|Neoplasm_of_stomach|Epidermal_nevus|Nevus_sebaceous|Epidermal_…
Positive	2_PRE	8934_L12_MO_CD34p_A	NRAS	chr1	115258745	115258745	C	G	785	775	10	1.27	exonic	nonsynonymous SNV	NM_002524:c.G37C:p.G13R	ID=COSM569;OCCURENCE=42(haematopoietic_and_lymphoid_tissue),1(NS),4(stomach),2(biliary_tract),8(large_intestine),1(urinary_tract),1(breast),28(skin),1(endometrium),1(salivary_gland),1(soft_tissue),3(autonomic_ganglia)	rs121434595	NA	NA	NA	D	D	D	M	CLINSIG=pathogenic|pathogenic;CLNDBN=Carcinoma_of_colon|Giant_pigmented_hairy_nevus;CLNREVSTAT=no_assertion_criteria_provided|no_assertion_criteria_provided;CLNACC=RCV000014913.4|RCV000114743.3;CLNDSDB=MedGen:SNOMED_CT|MedGen:OMIM:Orphanet;CLNDSDBID=C0699790:269533000|C1842036:137550:ORPHA626
Positive	2_PRE	8934_L12_MO_CD34p_A	MTOR	chr1	11316102	11316102	T	G	529	303	220	42.07	exonic	nonsynonymous SNV	NM_004958:c.A652C:p.I218L	NA	NA	NA	NA	NA	T	B	B	L	NA
Positive	2_PRE	8934_L12_MO_CD34p_A	RUNX1	chr21	36252865	36252865	C	T	410	209	199	48.77	exonic	nonsynonymous SNV	NM_001001890:c.G416A:p.R139Q	ID=COSM36055;OCCURENCE=3(haematopoietic_and_lymphoid_tissue)	NA	NA	NA	NA	D	D	D	M	NA
Positive	4_POST	10214_L12_MO_CD34p_A	STAG2	chrX	123197770	123197770	T	C	40	26	14	35	exonic	nonsynonymous SNV	NM_006603:c.T1894C:p.C632R	NA	NA	NA	NA	NA	D	P	P	M	NA
Positive	4_POST	10214_L12_MO_CD34p_A	DNMT3A	chr2	25469071	25469071	C	A	613	351	262	42.74	exonic	stopgain	NM_153759:c.G820T:p.E274X	NA	NA	NA	NA	NA	.	.	.	.	NA
Positive	4_POST	10214_L12_MO_CD34p_A	SUZ12	chr17	30323835	30323835	G	T	199	162	37	18.59	exonic	nonsynonymous SNV	NM_015355:c.G1813T:p.D605Y	NA	NA	NA	NA	NA	D	D	D	M	NA
Positive	4_POST	10214_L12_MO_CD34p_A	BCOR	chrX	39914629	39914629	A	-	84	51	33	39.29	exonic	frameshift deletion	NM_001123384:c.4577delT:p.F1526fs	NA	NA	NA	NA	NA	NA	NA	NA	NA	NA
Positive	4_POST	10214_L12_MO_CD34p_A	BCOR	chrX	39930400	39930400	-	C	96	68	27	28.42	exonic	frameshift insertion	NM_001123384:c.3009dupG:p.R1004fs	NA	NA	NA	NA	NA	NA	NA	NA	NA	NA
Positive	4_POST	10214_L12_MO_CD34p_A	KIT	chr4	55603390	55603390	A	G	206	117	89	43.2	exonic	nonsynonymous SNV	NM_000222:c.A2746G:p.T916A	NA	NA	NA	NA	NA	D	B	B	L	NA
Positive	4_POST	10214_L12_MO_CD34p_A	TET2	chr4	106155858	106155861	CAGT	-	262	153	109	41.6	exonic	frameshift deletion	NM_001127208:c.759_762del:p.N253fs	NA	NA	NA	NA	NA	NA	NA	NA	NA	NA
Positive	4_POST	10214_L12_MO_CD34p_A	TET2	chr4	106196336	106196336	-	T	106	67	39	36.79	exonic	frameshift insertion	NM_001127208:c.4670dupT:p.V1557fs	NA	NA	NA	NA	NA	NA	NA	NA	NA	NA
Positive	4_POST	10214_L12_MO_CD34p_A	SF3B1	chr2	198267359	198267359	C	G	121	65	56	46.28	exonic	nonsynonymous SNV	NM_012433:c.G1998C:p.K666N	ID=COSM132937;OCCURENCE=9(haematopoietic_and_lymphoid_tissue),1(liver)	rs377023736	NA	7.7e-05	5.77e-05	D	D	D	H	NA
Positive	4_PRE	9401_L12_MO_CD34p_A	BCOR	chrX	39930400	39930400	-	C	68	50	18	26.47	exonic	frameshift insertion	NM_001123384:c.3009dupG:p.R1004fs	NA	NA	NA	NA	NA	NA	NA	NA	NA	NA
Positive	4_PRE	9401_L12_MO_CD34p_A	STAG2	chrX	123197770	123197770	T	C	27	15	12	44.44	exonic	nonsynonymous SNV	NM_006603:c.T1894C:p.C632R	NA	NA	NA	NA	NA	D	P	P	M	NA
Positive	4_PRE	9401_L12_MO_CD34p_A	DNMT3A	chr2	25469071	25469071	C	A	404	227	177	43.81	exonic	stopgain	NM_153759:c.G820T:p.E274X	NA	NA	NA	NA	NA	.	.	.	.	NA
Positive	4_PRE	9401_L12_MO_CD34p_A	SUZ12	chr17	30323835	30323835	G	T	144	116	28	19.44	exonic	nonsynonymous SNV	NM_015355:c.G1813T:p.D605Y	NA	NA	NA	NA	NA	D	D	D	M	NA
Positive	4_PRE	9401_L12_MO_CD34p_A	BCOR	chrX	39914629	39914629	A	-	46	16	30	65.22	exonic	frameshift deletion	NM_001123384:c.4577delT:p.F1526fs	NA	NA	NA	NA	NA	NA	NA	NA	NA	NA
Positive	4_PRE	9401_L12_MO_CD34p_A	KIT	chr4	55603390	55603390	A	G	136	87	49	36.03	exonic	nonsynonymous SNV	NM_000222:c.A2746G:p.T916A	NA	NA	NA	NA	NA	D	B	B	L	NA
Positive	4_PRE	9401_L12_MO_CD34p_A	TET2	chr4	106155858	106155861	CAGT	-	188	96	92	48.94	exonic	frameshift deletion	NM_001127208:c.759_762del:p.N253fs	NA	NA	NA	NA	NA	NA	NA	NA	NA	NA
Positive	4_PRE	9401_L12_MO_CD34p_A	TET2	chr4	106196336	106196336	-	T	70	44	26	37.14	exonic	frameshift insertion	NM_001127208:c.4670dupT:p.V1557fs	NA	NA	NA	NA	NA	NA	NA	NA	NA	NA
Positive	4_PRE	9401_L12_MO_CD34p_A	SF3B1	chr2	198267359	198267359	C	G	73	38	35	47.95	exonic	nonsynonymous SNV	NM_012433:c.G1998C:p.K666N	ID=COSM132937;OCCURENCE=9(haematopoietic_and_lymphoid_tissue),1(liver)	rs377023736	NA	7.7e-05	5.77e-05	D	D	D	H	NA
Positive	5_POST	10333_L12_MO_CD34p_A	TP53	chr17	7577114	7577114	C	T	403	339	64	15.88	exonic	nonsynonymous SNV	NM_001126115:c.G428A:p.C143Y	ID=COSM3403255,COSM10893,COSM165084,COSM2744531;OCCURENCE=5(lung),2(haematopoietic_and_lymphoid_tissue),4(central_nervous_system),4(stomach),2(oesophagus),5(upper_aerodigestive_tract),1(NS),1(bone),1(skin),4(breast),1(prostate),10(large_intestine),1(biliary_tract),3(urinary_tract),2(pancreas),2(liver),6(ovary)	NA	NA	NA	NA	D	D	D	M	NA
Positive	5_POST	10333_L12_MO_CD34p_A	NRAS	chr1	115258747	115258747	C	A	272	254	18	6.62	exonic	nonsynonymous SNV	NM_002524:c.G35T:p.G12V	ID=COSM566;OCCURENCE=2(thyroid),1(testis),55(haematopoietic_and_lymphoid_tissue),7(skin),1(prostate),8(large_intestine)	rs121913237	NA	NA	NA	D	P	P	M	CLINSIG=pathogenic|pathogenic,pathogenic|pathogenic|pathogenic;CLNDBN=Noonan_syndrome_6|Rasopathy,Epidermal_nevus|Juvenile_myelomonocytic_leukemia|Rasopathy;CLNREVSTAT=criteria_provided\x2c_single_submitter|criteria_provided\x2c_single_submitter,no_assertion_criteria_provided|no_assertion_criteria_provided|criteria_provided\x2c_single_submitter;CLNACC=RCV000037576.2|RCV000158986.1,RCV000032849.6|…
Positive	5_PRE	9844_L12_MO_CD34p_A	TP53	chr17	7577114	7577114	C	T	515	96	416	81.25	exonic	nonsynonymous SNV	NM_001126115:c.G428A:p.C143Y	ID=COSM3403255,COSM10893,COSM165084,COSM2744531;OCCURENCE=5(lung),2(haematopoietic_and_lymphoid_tissue),4(central_nervous_system),4(stomach),2(oesophagus),5(upper_aerodigestive_tract),1(NS),1(bone),1(skin),4(breast),1(prostate),10(large_intestine),1(biliary_tract),3(urinary_tract),2(pancreas),2(liver),6(ovary)	NA	NA	NA	NA	D	D	D	M	NA
Positive	5_PRE	9844_L12_MO_CD34p_A	KRAS	chr12	25398285	25398285	C	T	189	176	13	6.88	exonic	nonsynonymous SNV	NM_004985:c.G34A:p.G12S	ID=COSM1152506,COSM517;OCCURENCE=11(small_intestine),4(skin),3(prostate),1037(large_intestine),65(biliary_tract),6(urinary_tract),91(pancreas),2(liver),1(soft_tissue),4(ovary),14(endometrium),18(thyroid),167(lung),1(penis),4(gastrointestinal_tract_(site_indeterminate)),14(cervix),1(testis),24(haematopoietic_and_lymphoid_tissue),8(stomach),2(oesophagus),7(upper_aerodigestive_tract)	rs121913530	NA	NA	NA	D	P	P	L	CLINSIG=pathogenic|pathogenic|untested,pathogenic|pathogenic|pathogenic,pathogenic|pathogenic|untested|pathogenic;CLNDBN=Lung_cancer|Non-small_cell_lung_cancer|Endometrial_carcinoma,Squamous_cell_carcinoma_of_lung|Malignant_tumor_of_urinary_bladder|Non-small_cell_lung_cancer,Neoplasm_of_stomach|Non-small_cell_lung_cancer|Neoplasm_of_ovary|Juvenile_myelomonocytic_leukemia;CLNREVSTAT=no_assertion_c…
Positive	5_PRE	9844_L12_MO_CD34p_A	NRAS	chr1	115258747	115258747	C	A	449	323	126	28.06	exonic	nonsynonymous SNV	NM_002524:c.G35T:p.G12V	ID=COSM566;OCCURENCE=2(thyroid),1(testis),55(haematopoietic_and_lymphoid_tissue),7(skin),1(prostate),8(large_intestine)	rs121913237	NA	NA	NA	D	P	P	M	CLINSIG=pathogenic|pathogenic,pathogenic|pathogenic|pathogenic;CLNDBN=Noonan_syndrome_6|Rasopathy,Epidermal_nevus|Juvenile_myelomonocytic_leukemia|Rasopathy;CLNREVSTAT=criteria_provided\x2c_single_submitter|criteria_provided\x2c_single_submitter,no_assertion_criteria_provided|no_assertion_criteria_provided|criteria_provided\x2c_single_submitter;CLNACC=RCV000037576.2|RCV000158986.1,RCV000032849.6|…
Positive	7_POST	10708_L12_MO_CD34p_A	BCOR	chrX	39913190	39913190	G	C	471	378	93	19.75	exonic	stopgain	NM_001123384:c.C4769G:p.S1590X	ID=COSM519191;OCCURENCE=1(haematopoietic_and_lymphoid_tissue)	NA	NA	NA	NA	.	.	.	.	NA
Positive	7_POST	10708_L12_MO_CD34p_A	TET2	chr4	106180857	106180857	C	A	617	21	594	96.59	exonic	stopgain	NM_001127208:c.C3885A:p.Y1295X	NA	NA	NA	NA	NA	.	.	.	.	NA
Positive	7_PRE	10236_L12_MO_CD34p_A	BCOR	chrX	39913190	39913190	G	C	506	393	112	22.18	exonic	stopgain	NM_001123384:c.C4769G:p.S1590X	ID=COSM519191;OCCURENCE=1(haematopoietic_and_lymphoid_tissue)	NA	NA	NA	NA	.	.	.	.	NA
Positive	7_PRE	10236_L12_MO_CD34p_A	TET2	chr4	106180857	106180857	C	A	616	61	550	89.87	exonic	stopgain	NM_001127208:c.C3885A:p.Y1295X	NA	NA	NA	NA	NA	.	.	.	.	NA
Positive	8_POST	10370_L12_MO_CD34p_A	ASXL1	chr20	31023472	31023472	A	G	410	204	203	49.75	exonic	nonsynonymous SNV	NM_015338:c.A2957G:p.N986S	ID=COSM96383;OCCURENCE=2(haematopoietic_and_lymphoid_tissue),1(large_intestine)	rs145132837	0.000399361	0.0023	0.0013	T	B	B	L	CLINSIG=untested;CLNDBN=not_specified;CLNREVSTAT=no_assertion_provided;CLNACC=RCV000120092.1;CLNDSDB=MedGen;CLNDSDBID=CN169374
Positive	8_POST	10370_L12_MO_CD34p_A	TP53	chr17	7577129	7577129	A	G	835	797	33	3.98	exonic	nonsynonymous SNV	NM_001126115:c.T413C:p.F138S	ID=COSM437483,COSM11305;OCCURENCE=1(ovary),1(pancreas),1(large_intestine),3(breast),1(upper_aerodigestive_tract),2(oesophagus),2(central_nervous_system),1(haematopoietic_and_lymphoid_tissue)	NA	NA	NA	NA	D	D	D	M	NA
Positive	8_POST	10370_L12_MO_CD34p_A	DNMT3A	chr2	25457242	25457242	C	T	974	874	98	10.08	exonic	nonsynonymous SNV	NM_153759:c.G2078A:p.R693H	ID=COSM52944,COSM442676;OCCURENCE=1(breast),410(haematopoietic_and_lymphoid_tissue)	rs147001633	NA	0.0007	0.0005	D	P	B	M	NA
Positive	8_POST	10370_L12_MO_CD34p_A	KMT2A	chr11	118343474	118343474	T	C	632	353	273	43.47	exonic	nonsynonymous SNV	NM_001197104:c.T1600C:p.S534P	NA	NA	NA	NA	NA	D	B	B	N	NA
Positive	8_POST	10370_L12_MO_CD34p_A	STAG1	chr3	136062845	136062845	T	G	105	48	57	54.29	exonic	nonsynonymous SNV	NM_005862:c.A3275C:p.E1092A	NA	NA	NA	NA	NA	T	B	B	L	NA
Positive	8_PRE	10067_L12_MO_CD34p_A	ASXL1	chr20	31023472	31023472	A	G	445	237	208	46.74	exonic	nonsynonymous SNV	NM_015338:c.A2957G:p.N986S	ID=COSM96383;OCCURENCE=2(haematopoietic_and_lymphoid_tissue),1(large_intestine)	rs145132837	0.000399361	0.0023	0.0013	T	B	B	L	CLINSIG=untested;CLNDBN=not_specified;CLNREVSTAT=no_assertion_provided;CLNACC=RCV000120092.1;CLNDSDB=MedGen;CLNDSDBID=CN169374
Positive	8_PRE	10067_L12_MO_CD34p_A	TP53	chr17	7577129	7577129	A	G	706	88	615	87.48	exonic	nonsynonymous SNV	NM_001126115:c.T413C:p.F138S	ID=COSM437483,COSM11305;OCCURENCE=1(ovary),1(pancreas),1(large_intestine),3(breast),1(upper_aerodigestive_tract),2(oesophagus),2(central_nervous_system),1(haematopoietic_and_lymphoid_tissue)	NA	NA	NA	NA	D	D	D	M	NA
Positive	8_PRE	10067_L12_MO_CD34p_A	DNMT3A	chr2	25457242	25457242	C	T	823	478	342	41.71	exonic	nonsynonymous SNV	NM_153759:c.G2078A:p.R693H	ID=COSM52944,COSM442676;OCCURENCE=1(breast),410(haematopoietic_and_lymphoid_tissue)	rs147001633	NA	0.0007	0.0005	D	P	B	M	NA
Positive	8_PRE	10067_L12_MO_CD34p_A	KMT2A	chr11	118343474	118343474	T	C	664	362	298	45.02	exonic	nonsynonymous SNV	NM_001197104:c.T1600C:p.S534P	NA	NA	NA	NA	NA	D	B	B	N	NA
Positive	8_PRE	10067_L12_MO_CD34p_A	STAG1	chr3	136062845	136062845	T	G	166	94	72	43.37	exonic	nonsynonymous SNV	NM_005862:c.A3275C:p.E1092A	NA	NA	NA	NA	NA	T	B	B	L	NA
Positive	9_POST	11047_L12_MO_CD34p	NRAS	chr1	115258748	115258748	C	T	968	779	186	19.25	exonic	nonsynonymous SNV	NM_002524:c.G34A:p.G12S	ID=COSM563;OCCURENCE=6(large_intestine),6(prostate),13(skin),1(soft_tissue),93(haematopoietic_and_lymphoid_tissue),3(lung),21(upper_aerodigestive_tract)	rs121913250	NA	NA	NA	D	B	B	L	CLINSIG=pathogenic,pathogenic,pathogenic|pathogenic|pathogenic|pathogenic;CLNDBN=Rasopathy,Rasopathy,Juvenile_myelomonocytic_leukemia|Noonan_syndrome_6|Juvenile_myelomonocytic_leukemia|Rasopathy;CLNREVSTAT=criteria_provided\x2c_single_submitter,criteria_provided\x2c_single_submitter,criteria_provided\x2c_single_submitter|criteria_provided\x2c_single_submitter|no_assertion_criteria_provided|criter…
Positive	9_POST	11047_L12_MO_CD34p	DNMT3A	chr2	25457209	25457209	C	G	671	355	313	46.86	exonic	nonsynonymous SNV	NM_153759:c.G2111C:p.W704S	ID=COSM221582;OCCURENCE=2(haematopoietic_and_lymphoid_tissue)	NA	NA	NA	NA	D	D	D	M	NA
Positive	9_POST	11047_L12_MO_CD34p	GATA2	chr3	128200730	128200730	A	C	894	489	403	45.18	exonic	nonsynonymous SNV	NM_001145662:c.T1033G:p.L345V	ID=COSM41611;OCCURENCE=8(haematopoietic_and_lymphoid_tissue)	NA	NA	NA	NA	D	D	D	M	NA
Positive	9_POST	11047_L12_MO_CD34p	KRAS	chr12	25380285	25380285	G	A	493	458	34	6.91	exonic	nonsynonymous SNV	NM_004985:c.C173T:p.T58I	ID=COSM87288;OCCURENCE=1(large_intestine),4(haematopoietic_and_lymphoid_tissue)	rs104894364	NA	NA	NA	D	D	D	H	CLINSIG=pathogenic|pathogenic;CLNDBN=Noonan_syndrome_3|Rasopathy;CLNREVSTAT=criteria_provided\x2c_single_submitter|criteria_provided\x2c_single_submitter;CLNACC=RCV000013419.19|RCV000157933.1;CLNDSDB=GeneReviews:MedGen:OMIM:Orphanet|MedGen;CLNDSDBID=NBK1124:C1860991:609942:ORPHA648|CN166718
Positive	9_POST	11047_L12_MO_CD34p	NF1	chr17	29553477	29553477	-	C	640	56	522	82.73	exonic	frameshift insertion	NM_000267:c.2027dupC:p.T676fs	ID=COSM1235317,COSM1382061;OCCURENCE=1(haematopoietic_and_lymphoid_tissue),2(large_intestine)	rs587781807	NA	NA	5.811e-05	NA	NA	NA	NA	CLINSIG=pathogenic;CLNDBN=Hereditary_cancer-predisposing_syndrome;CLNREVSTAT=criteria_provided\x2c_single_submitter;CLNACC=RCV000130078.1;CLNDSDB=MedGen:SNOMED_CT;CLNDSDBID=C0027672:699346009
Positive	9_POST	11047_L12_MO_CD34p	BCOR	chrX	39916511	39916512	AA	-	273	42	230	84.56	exonic	frameshift deletion	NM_001123384:c.4335_4336del:p.G1445fs	NA	NA	NA	NA	NA	NA	NA	NA	NA	NA
Positive	9_PRE	10439_L12_MO_CD34p	NRAS	chr1	115258748	115258748	C	T	982	522	458	46.73	exonic	nonsynonymous SNV	NM_002524:c.G34A:p.G12S	ID=COSM563;OCCURENCE=6(large_intestine),6(prostate),13(skin),1(soft_tissue),93(haematopoietic_and_lymphoid_tissue),3(lung),21(upper_aerodigestive_tract)	rs121913250	NA	NA	NA	D	B	B	L	CLINSIG=pathogenic,pathogenic,pathogenic|pathogenic|pathogenic|pathogenic;CLNDBN=Rasopathy,Rasopathy,Juvenile_myelomonocytic_leukemia|Noonan_syndrome_6|Juvenile_myelomonocytic_leukemia|Rasopathy;CLNREVSTAT=criteria_provided\x2c_single_submitter,criteria_provided\x2c_single_submitter,criteria_provided\x2c_single_submitter|criteria_provided\x2c_single_submitter|no_assertion_criteria_provided|criter…
Positive	9_PRE	10439_L12_MO_CD34p	DNMT3A	chr2	25457209	25457209	C	G	643	341	302	46.97	exonic	nonsynonymous SNV	NM_153759:c.G2111C:p.W704S	ID=COSM221582;OCCURENCE=2(haematopoietic_and_lymphoid_tissue)	NA	NA	NA	NA	D	D	D	M	NA
Positive	9_PRE	10439_L12_MO_CD34p	GATA2	chr3	128200730	128200730	A	C	909	492	413	45.53	exonic	nonsynonymous SNV	NM_001145662:c.T1033G:p.L345V	ID=COSM41611;OCCURENCE=8(haematopoietic_and_lymphoid_tissue)	NA	NA	NA	NA	D	D	D	M	NA
Positive	9_PRE	10439_L12_MO_CD34p	NF1	chr17	29553477	29553477	-	C	495	45	405	82.65	exonic	frameshift insertion	NM_000267:c.2027dupC:p.T676fs	ID=COSM1235317,COSM1382061;OCCURENCE=1(haematopoietic_and_lymphoid_tissue),2(large_intestine)	rs587781807	NA	NA	5.811e-05	NA	NA	NA	NA	CLINSIG=pathogenic;CLNDBN=Hereditary_cancer-predisposing_syndrome;CLNREVSTAT=criteria_provided\x2c_single_submitter;CLNACC=RCV000130078.1;CLNDSDB=MedGen:SNOMED_CT;CLNDSDBID=C0027672:699346009
Positive	9_PRE	10439_L12_MO_CD34p	BCOR	chrX	39916511	39916512	AA	-	253	35	217	86.11	exonic	frameshift deletion	NM_001123384:c.4335_4336del:p.G1445fs	NA	NA	NA	NA	NA	NA	NA	NA	NA	NA
