# Supplementary material for: Molecular profiling of pre- and post- 5-azacytidine myelodysplastic syndrome samples identifies predictors of response
Source: Front Oncol. 2024 Sep 23;14:1438052. doi: 10.3389/fonc.2024.1438052 (PMC11456566; doi:10.3389/fonc.2024.1438052)
Supplement: Supplementary Table 4 — List of genes differentially expressed between pre-treatment MDS HSPCs and healthy controls. [file Table4.xlsx]

## Sheet: Sheet1
Supplementary Table 4. List of genes differentially expressed between pre-treatment MDS/AML CD34+ cells and healthy controls
ENSG	gene_symbol	baseMean	log2FoldChange_MDS/AML_vs_control	lfcSE	stat	pvalue	padj
ENSG00000114374	USP9Y	116.332	24.4583	2.64293	9.25426	2.16e-20	6.64e-16
ENSG00000231535	LINC00278	28.482	22.5003	2.75151	8.17743	2.9e-16	2.23e-12
ENSG00000241859	ANOS2P	15.2935	21.6362	3.25767	6.6416	3.1e-11	4.55e-08
ENSG00000268696	ZNF723	13.6671	21.0665	3.13861	6.71206	1.92e-11	3.11e-08
ENSG00000129824	RPS4Y1	2930.27	14.9325	1.66732	8.95599	3.37e-19	5.18e-15
ENSG00000198692	EIF1AY	852.001	13.1504	1.65798	7.9316	2.16e-15	1.11e-11
ENSG00000131002	TXLNGY	678.435	12.8218	1.74645	7.34165	2.11e-13	6.5e-10
ENSG00000012817	KDM5D	639.972	12.7376	1.63326	7.79887	6.25e-15	2.61e-11
ENSG00000233864	TTTY15	564.814	11.5954	1.67218	6.93429	4.08e-12	7.39e-09
ENSG00000154620	TMSB4Y	120.699	10.331	1.72972	5.97266	2.33e-09	1.97e-06
ENSG00000183878	UTY	799.801	9.90895	1.40646	7.04533	1.85e-12	4.07e-09
ENSG00000176728	TTTY14	71.6144	9.57777	1.78758	5.35795	8.42e-08	3.7e-05
ENSG00000171724	VAT1L	42.4604	-9.45316	1.30507	-7.24341	4.38e-13	1.22e-09
ENSG00000074211	PPP2R2C	48.335	-9.43242	1.0666	-8.84349	9.28e-19	9.52e-15
ENSG00000067048	DDX3Y	3265.87	9.28761	1.15882	8.0147	1.1e-15	6.8e-12
ENSG00000211642	IGLV10-54	140.22	-8.8261	1.56734	-5.63128	1.79e-08	1.02e-05
ENSG00000174358	SLC6A19	20.9209	-8.43204	1.46023	-5.77446	7.72e-09	5.06e-06
ENSG00000175746	C15orf54	19.4643	-8.32708	1.40668	-5.91968	3.23e-09	2.55e-06
ENSG00000122043	LINC00544	53.1665	-8.32419	1.13132	-7.35797	1.87e-13	6.39e-10
ENSG00000267521	AC016168.1	38.64	-7.93027	1.39175	-5.69807	1.21e-08	7.31e-06
ENSG00000184564	SLITRK6	44.1555	7.91676	1.73137	4.57254	4.82e-06	0.000730557
ENSG00000103355	PRSS33	17.8985	-7.78449	1.73087	-4.49744	6.88e-06	0.00091268
ENSG00000278756	MIR6722	12.9188	-7.73724	1.2285	-6.2981	3.01e-10	3.57e-07
ENSG00000067646	ZFY	653.69	7.69312	1.27075	6.05398	1.41e-09	1.32e-06
ENSG00000253673	AC025437.4	16.1606	-7.63444	1.41827	-5.38293	7.33e-08	3.42e-05
ENSG00000233208	LINC00642	12.0153	-7.63279	1.23649	-6.17297	6.7e-10	6.66e-07
ENSG00000205444	AL034376.1	11.5572	-7.57611	1.86485	-4.06259	4.85e-05	0.0034828
ENSG00000165309	ARMC3	11.1703	-7.52455	1.43231	-5.25345	1.49e-07	5.67e-05
ENSG00000230830	ARPP21-AS1	11.0742	-7.51444	1.84145	-4.08071	4.49e-05	0.00334692
ENSG00000223985	LINC01874	16.5373	7.46347	2.06995	3.60562	0.000311404	0.011706
ENSG00000226159	LINC01375	36.5521	-7.44194	1.33488	-5.57498	2.48e-08	1.36e-05
ENSG00000185274	GALNT17	13.4934	-7.37592	1.49376	-4.93784	7.9e-07	0.00019456
ENSG00000161798	AQP5	45.0336	-7.321	1.54747	-4.73095	2.23e-06	0.000434263
ENSG00000169174	PCSK9	9.67433	-7.31849	1.95503	-3.74342	0.000181531	0.00849139
ENSG00000217896	ZNF839P1	14.829	7.30551	2.18231	3.34761	0.00081512	0.0210706
ENSG00000005102	MEOX1	9.04668	-7.22155	1.43753	-5.02357	5.07e-07	0.000141955
ENSG00000084674	APOB	11.6529	-7.16321	1.33847	-5.35181	8.71e-08	3.78e-05
ENSG00000196167	COLCA1	8.66727	-7.16028	1.53714	-4.65819	3.19e-06	0.000542593
ENSG00000082497	SERTAD4	15.3839	-7.13703	1.07308	-6.65098	2.91e-11	4.48e-08
ENSG00000240710	AL512306.3	22.325	-7.09245	1.00096	-7.08563	1.38e-12	3.28e-09
ENSG00000235621	LINC00494	8.04096	-7.05234	1.36577	-5.16362	2.42e-07	8.28e-05
ENSG00000253811	AC136424.2	7.99874	-7.04471	1.84102	-3.82653	0.000129962	0.00675871
ENSG00000197705	KLHL14	10.7363	-7.04115	1.00142	-7.03114	2.05e-12	4.2e-09
ENSG00000261434	AC021087.4	29.0687	-7.03812	1.39852	-5.03255	4.84e-07	0.00013771
ENSG00000260564	AL161912.2	7.93114	-7.03274	1.82791	-3.84742	0.000119367	0.00642339
ENSG00000211931	IGHD2-2	19.2659	-6.98628	1.32641	-5.26705	1.39e-07	5.34e-05
ENSG00000109758	HGFAC	7.54967	-6.95991	1.12869	-6.16638	6.99e-10	6.72e-07
ENSG00000204092	LINC00951	7.47372	-6.94814	1.26415	-5.49631	3.88e-08	1.96e-05
ENSG00000236833	AC024560.1	9.94004	-6.93053	1.75635	-3.94598	7.95e-05	0.00485473
ENSG00000074410	CA12	7.33109	-6.91669	1.18477	-5.838	5.28e-09	3.85e-06
ENSG00000133454	MYO18B	56.9567	-6.91043	1.44145	-4.79406	1.63e-06	0.000349426
ENSG00000137273	FOXF2	7.2497	-6.90367	1.87027	-3.69127	0.000223133	0.00954112
ENSG00000070019	GUCY2C	7.15624	-6.88122	1.17911	-5.83594	5.35e-09	3.85e-06
ENSG00000110786	PTPN5	7.08972	-6.87027	1.9201	-3.57808	0.000346123	0.0123908
ENSG00000223622	GSTA6P	7.02309	-6.85581	2.47998	-2.76447	0.0057016	0.0710381
ENSG00000204614	TRIM40	6.9679	-6.84519	1.8821	-3.63699	0.000275838	0.0109014
ENSG00000086159	AQP6	9.28693	-6.83791	1.2721	-5.37528	7.65e-08	3.51e-05
ENSG00000231437	LINC01750	9.24162	-6.82422	1.39163	-4.90376	9.4e-07	0.000220647
ENSG00000106128	GHRHR	6.84845	-6.82101	1.52321	-4.47805	7.53e-06	0.000972873
ENSG00000160856	FCRL3	27.0973	-6.80647	1.31336	-5.18249	2.19e-07	7.84e-05
ENSG00000139364	TMEM132B	9.00869	-6.78404	1.3676	-4.96053	7.03e-07	0.000178871
ENSG00000095203	EPB41L4B	23.1415	-6.75144	1.25934	-5.3611	8.27e-08	3.69e-05
ENSG00000152931	PART1	8.63033	-6.729	1.34789	-4.99223	5.97e-07	0.000159787
ENSG00000011347	SYT7	8.63174	-6.72227	1.39498	-4.8189	1.44e-06	0.000312962
ENSG00000237603	HMGB3P12	6.01567	-6.63297	1.88502	-3.51877	0.000433547	0.014245
ENSG00000231964	AL731567.1	6.0285	-6.63231	1.16015	-5.71677	1.09e-08	6.69e-06
ENSG00000243955	GSTA1	5.93926	-6.61372	2.51254	-2.63229	0.00848126	0.0906641
ENSG00000275791	TRBV10-3	5.93756	-6.61263	2.10119	-3.14708	0.00164908	0.0328611
ENSG00000266088	AC004585.1	5.90631	-6.60562	1.92981	-3.42293	0.000619502	0.0178175
ENSG00000253424	AC025437.2	5.83339	-6.58927	1.89485	-3.47746	0.000506197	0.0155713
ENSG00000218672	AC008060.1	5.73622	-6.56411	1.50345	-4.36603	1.27e-05	0.00142685
ENSG00000279024	AC112255.1	5.71176	-6.55961	1.8598	-3.52705	0.000420214	0.0140012
ENSG00000101463	SYNDIG1	51.2557	-6.54965	1.7044	-3.84278	0.000121649	0.00650211
ENSG00000258399	AL117190.1	29.4011	6.54171	1.86031	3.51646	0.000437348	0.0143089
ENSG00000242473	KIR2DP1	6.5383	-6.53731	1.53853	-4.24907	2.15e-05	0.00202721
ENSG00000184811	TRARG1	5.58343	-6.52694	2.02919	-3.21653	0.00129753	0.0284136
ENSG00000178233	TMEM151B	7.51226	-6.51144	1.01805	-6.396	1.6e-10	2.05e-07
ENSG00000164400	CSF2	8.48867	6.50121	2.00306	3.24563	0.00117189	0.0267133
ENSG00000112319	EYA4	5.36589	-6.46913	1.44361	-4.48122	7.42e-06	0.000972333
ENSG00000167094	TTC16	9.89165	-6.46882	1.83583	-3.52365	0.000425643	0.0140604
ENSG00000106536	POU6F2	8.46913	-6.46329	1.79397	-3.60278	0.000314828	0.0117486
ENSG00000070915	SLC12A3	5.33495	-6.46137	1.6888	-3.82602	0.000130231	0.00676128
ENSG00000205890	AC108134.1	5.24636	-6.4352	1.93388	-3.32761	0.000875932	0.0220501
ENSG00000137261	KIAA0319	5.22771	-6.4284	1.3062	-4.92146	8.59e-07	0.000208236
ENSG00000165553	NGB	5.16297	-6.4131	1.90107	-3.37342	0.000742416	0.0199448
ENSG00000188076	SCGB1C1	6.93551	-6.41105	2.16413	-2.96242	0.00305233	0.0481336
ENSG00000141738	GRB7	10.7222	-6.3805	1.24396	-5.12917	2.91e-07	9.74e-05
ENSG00000170561	IRX2	6.78909	-6.36982	1.51338	-4.209	2.57e-05	0.00230721
ENSG00000196092	PAX5	521.652	-6.34761	1.62969	-3.89497	9.82e-05	0.00570486
ENSG00000233070	ZFY-AS1	7.60553	6.34282	2.34195	2.70834	0.00676198	0.0794282
ENSG00000204283	LINC01973	25.9265	-6.34277	1.6518	-3.83992	0.000123075	0.00654425
ENSG00000279127	AL121950.1	4.85692	-6.3226	2.08717	-3.02927	0.00245143	0.0424313
ENSG00000134917	ADAMTS8	4.85817	-6.3209	1.2933	-4.88741	1.02e-06	0.000234744
ENSG00000249364	AC112206.2	4.81803	-6.31076	2.07199	-3.04575	0.00232097	0.0412562
ENSG00000082293	COL19A1	16.2496	-6.3059	1.37858	-4.57418	4.78e-06	0.000728644
ENSG00000236078	LINC01447	4.71631	-6.28312	1.57109	-3.99922	6.36e-05	0.00419043
ENSG00000105357	MYH14	8.63965	-6.27582	1.04498	-6.00571	1.9e-09	1.68e-06
ENSG00000260197	AC010889.1	7.15441	6.25758	1.93715	3.23031	0.00123656	0.0277681
ENSG00000271615	ACTG1P22	5.34994	-6.2483	1.36373	-4.58176	4.61e-06	0.000713325
ENSG00000235653	AC007253.1	4.60097	-6.24769	2.41435	-2.58774	0.00966087	0.0981939
ENSG00000072657	TRHDE	9.73553	-6.23798	0.800918	-7.78854	6.78e-15	2.61e-11
ENSG00000122585	NPY	723.016	-6.21868	1.40343	-4.43107	9.38e-06	0.0011547
ENSG00000129514	FOXA1	62.6697	6.16948	1.63749	3.76764	0.000164797	0.00800251
ENSG00000133863	TEX15	4.3674	-6.16858	1.06418	-5.79655	6.77e-09	4.53e-06
ENSG00000125414	MYH2	4.30979	-6.15042	1.71866	-3.57861	0.000345428	0.0123803
ENSG00000115507	OTX1	5.77678	-6.14245	1.47423	-4.16655	3.09e-05	0.00263505
ENSG00000147588	PMP2	5.77177	-6.13746	1.36094	-4.50973	6.49e-06	0.00088424
ENSG00000249669	CARMN	5.78289	-6.13709	1.21634	-5.04553	4.52e-07	0.000131358
ENSG00000236304	AP001189.1	358.705	-6.13688	0.979192	-6.26729	3.67e-10	4.19e-07
ENSG00000172482	AGXT	12.898	6.13306	1.97816	3.10039	0.00193267	0.0364652
ENSG00000261018	AC002101.1	4.22733	-6.12707	1.27844	-4.79262	1.65e-06	0.000349529
ENSG00000177324	BEND2	76.2874	-6.11459	1.51213	-4.04369	5.26e-05	0.0036321
ENSG00000147799	ARHGAP39	10.2514	-6.11116	1.01281	-6.03384	1.6e-09	1.45e-06
ENSG00000172995	ARPP21	911.672	-6.11011	1.55733	-3.92345	8.73e-05	0.00523852
ENSG00000186832	KRT16	6.43054	6.10277	2.2005	2.77336	0.00554808	0.0697068
ENSG00000004848	ARX	4.15255	-6.09746	1.54456	-3.9477	7.89e-05	0.00483927
ENSG00000123454	DBH	14.917	-6.09401	1.10173	-5.53129	3.18e-08	1.69e-05
ENSG00000267095	AC025048.1	6.4005	6.09037	1.78925	3.40387	0.000664392	0.0184743
ENSG00000152049	KCNE4	24.7059	-6.09023	1.14116	-5.33689	9.46e-08	3.88e-05
ENSG00000145934	TENM2	10.4853	-6.08841	1.44782	-4.20521	2.61e-05	0.00232768
ENSG00000250961	AC025470.2	4.06199	-6.06711	1.42765	-4.2497	2.14e-05	0.00202721
ENSG00000184601	C14orf180	4.05948	-6.06665	1.93815	-3.13013	0.00174731	0.0341769
ENSG00000224413	AP001476.1	5.48576	-6.05504	1.51685	-3.99185	6.56e-05	0.00425826
ENSG00000135917	SLC19A3	4.01467	-6.05151	1.98773	-3.04444	0.00233117	0.0413659
ENSG00000170381	SEMA3E	5.43149	-6.05017	1.12051	-5.39948	6.68e-08	3.2e-05
ENSG00000036828	CASR	5.38741	-6.03389	1.11577	-5.40783	6.38e-08	3.12e-05
ENSG00000164128	NPY1R	5.35258	-6.02592	1.45789	-4.13333	3.58e-05	0.00288329
ENSG00000254717	GLYATL1P2	8.41877	-6.01837	1.48043	-4.0653	4.8e-05	0.00345067
ENSG00000223914	LINC02471	3.90098	-6.00618	1.65825	-3.622	0.000292332	0.011335
ENSG00000211639	IGLV4-60	94.5576	-5.99379	1.29196	-4.63929	3.5e-06	0.000578685
ENSG00000101180	HRH3	3.83138	-5.98459	1.68307	-3.55575	0.000376895	0.0131113
ENSG00000259383	AC012414.3	8.17253	-5.98035	2.30507	-2.59443	0.00947473	0.0968455
ENSG00000185028	LRRC14B	112.599	-5.97879	2.08489	-2.86767	0.00413503	0.058228
ENSG00000162494	LRRC38	16.3734	-5.97781	1.64996	-3.62301	0.0002912	0.0113054
ENSG00000236075	AL359475.1	3.82291	-5.97764	1.5794	-3.78476	0.000153857	0.00759103
ENSG00000136883	KIF12	3.757	-5.95452	1.52591	-3.90228	9.53e-05	0.00559776
ENSG00000259070	LINC00639	5.1589	-5.95312	0.828951	-7.1815	6.89e-13	1.77e-09
ENSG00000235033	AL590999.1	3.71231	-5.93387	1.36326	-4.35269	1.34e-05	0.00146265
ENSG00000095752	IL11	1368.98	5.91353	1.41116	4.19054	2.78e-05	0.00244096
ENSG00000205126	ACCSL	6.53718	-5.90596	1.92604	-3.06637	0.00216676	0.0393612
ENSG00000244681	MTHFD2P1	3.60378	-5.89494	1.24618	-4.73041	2.24e-06	0.000434263
ENSG00000278847	AC006157.1	5.55664	5.89068	2.03671	2.89225	0.00382497	0.055364
ENSG00000164344	KLKB1	3.58218	-5.88758	1.49187	-3.94645	7.93e-05	0.00485473
ENSG00000277559	AC018553.1	3.47506	-5.84265	2.10583	-2.77451	0.00552844	0.0695462
ENSG00000256574	OR13A1	4.72462	-5.83972	2.17764	-2.68168	0.00732535	0.0830359
ENSG00000112246	SIM1	3.45183	-5.83064	1.97423	-2.95337	0.00314322	0.0487753
ENSG00000168348	INSM2	3.41194	-5.81285	2.08249	-2.7913	0.00524964	0.0674262
ENSG00000215808	LINC01139	3.38564	-5.80416	2.05024	-2.83097	0.00464072	0.0623282
ENSG00000227115	LINC01630	3.35604	-5.78684	1.82182	-3.1764	0.00149117	0.0307344
ENSG00000263409	MIR4747	3.33933	-5.78664	1.70384	-3.39624	0.000683172	0.0188297
ENSG00000275512	AC007998.4	3.3295	-5.78193	2.03765	-2.83755	0.00454614	0.0614196
ENSG00000232517	AC112198.2	5.28912	-5.77785	1.95209	-2.95983	0.00307808	0.0483296
ENSG00000283247	AC096582.3	3.29847	-5.76364	1.64941	-3.49436	0.000475208	0.0149746
ENSG00000182256	GABRG3	3.28568	-5.75612	1.04543	-5.50596	3.67e-08	1.92e-05
ENSG00000137691	CFAP300	3.25607	-5.74757	2.04327	-2.81293	0.00490919	0.0647555
ENSG00000189238	LINC00943	3.25161	-5.74487	2.04874	-2.8041	0.00504577	0.0657681
ENSG00000198353	HOXC4	3.25687	-5.74377	1.67637	-3.42632	0.000611818	0.017744
ENSG00000215262	KCNU1	3.25658	-5.74371	1.36314	-4.2136	2.51e-05	0.00228251
ENSG00000216906	AL355312.1	3.23877	-5.73882	2.00339	-2.86456	0.00417586	0.0585704
ENSG00000200997	RNU1-85P	9.86763	5.73877	1.20636	4.75711	1.96e-06	0.000397763
ENSG00000162687	KCNT2	4.37875	-5.7358	1.12776	-5.086	3.66e-07	0.000113722
ENSG00000079393	DUSP13	40.6593	-5.72145	1.91016	-2.99528	0.00274195	0.0454948
ENSG00000228613	AC141930.1	13.5691	-5.71663	1.82744	-3.12822	0.00175871	0.0342735
ENSG00000238201	AC114752.2	20.2579	-5.69912	1.25278	-4.54918	5.39e-06	0.000774776
ENSG00000197549	PRAMENP	3.12524	-5.68739	1.63673	-3.47486	0.000511124	0.0156577
ENSG00000160471	COX6B2	67.2895	5.67668	1.24247	4.56887	4.9e-06	0.000736414
ENSG00000168594	ADAM29	3.10367	-5.67469	1.55942	-3.63897	0.000273726	0.0108708
ENSG00000164794	KCNV1	3.10113	-5.67295	1.77345	-3.19883	0.00137987	0.0295631
ENSG00000229269	AL451048.1	5.6265	-5.6652	1.54662	-3.66295	0.000249331	0.0102889
ENSG00000241472	PTPRG-AS1	6.67838	-5.66146	0.912629	-6.20347	5.52e-10	5.86e-07
ENSG00000249574	AC226118.1	3.05647	-5.6583	1.75097	-3.23151	0.00123136	0.0277576
ENSG00000152402	GUCY1A2	4.11937	-5.644	1.41908	-3.97721	6.97e-05	0.00446306
ENSG00000248713	C4orf54	3.02596	-5.64024	2.02997	-2.77848	0.00546132	0.0692299
ENSG00000139044	B4GALNT3	7.59869	-5.63174	1.10607	-5.09167	3.55e-07	0.000112648
ENSG00000144290	SLC4A10	3.01091	-5.63002	1.67482	-3.36156	0.00077504	0.020562
ENSG00000169194	IL13	21.9033	-5.62921	1.37808	-4.08482	4.41e-05	0.00332039
ENSG00000267568	AC016168.2	43.8573	-5.62615	1.20353	-4.67469	2.94e-06	0.000523606
ENSG00000225585	IPPKP1	8.89756	5.59779	1.6653	3.36143	0.000775407	0.020562
ENSG00000225028	AC096541.1	2.92441	-5.59461	1.80715	-3.09581	0.00196276	0.036846
ENSG00000280339	AP001528.3	2.92627	-5.5931	1.64941	-3.39098	0.000696435	0.0190419
ENSG00000268297	CLEC4GP1	5.35547	-5.57391	1.35141	-4.12451	3.72e-05	0.00296322
ENSG00000130876	SLC7A10	12.9654	-5.5563	2.1115	-2.63144	0.00850232	0.0907632
ENSG00000064270	ATP2C2	78.2856	-5.55572	1.48274	-3.74692	0.000179016	0.00842715
ENSG00000188050	RNF133	2.83636	-5.54968	1.82638	-3.03863	0.00237655	0.0417712
ENSG00000261734	AC116096.1	2.83532	-5.54488	1.6478	-3.36502	0.00076537	0.0203836
ENSG00000105880	DLX5	5.25677	-5.53359	1.47535	-3.75069	0.000176349	0.00833194
ENSG00000236241	AC119744.1	2.79027	-5.52253	2.04384	-2.70204	0.00689154	0.0805505
ENSG00000163534	FCRL1	161.095	-5.52228	1.73665	-3.17985	0.00147353	0.0305491
ENSG00000274956	AC120042.3	2.76842	-5.51507	1.50415	-3.66657	0.000245822	0.0101585
ENSG00000243444	PALM2	3.76193	-5.5125	1.7203	-3.20438	0.00135353	0.0292429
ENSG00000109272	PF4V1	347.908	-5.50694	0.993244	-5.5444	2.95e-08	1.59e-05
ENSG00000186369	LINC00643	2.75848	-5.50667	2.04896	-2.68755	0.00719786	0.0824964
ENSG00000188039	NWD1	2.75346	-5.50492	2.08146	-2.64474	0.00817529	0.0888745
ENSG00000162631	NTNG1	8.95343	-5.49671	1.27315	-4.31743	1.58e-05	0.0016213
ENSG00000162643	WDR63	2.74002	-5.4961	1.5713	-3.4978	0.00046912	0.0148131
ENSG00000283646	LINC02009	5.1995	-5.49215	1.91966	-2.861	0.00422309	0.0589376
ENSG00000170927	PKHD1	8.83642	-5.49082	1.15543	-4.75218	2.01e-06	0.000402308
ENSG00000255191	AP003555.3	2.72271	-5.49075	1.59276	-3.44732	0.000566188	0.0166806
ENSG00000233309	RPS6P12	3.70384	-5.48887	1.75305	-3.13104	0.0017419	0.0341177
ENSG00000187922	LCN10	44.3122	-5.47992	1.03325	-5.30359	1.14e-07	4.54e-05
ENSG00000251011	TMEM108-AS1	2.6984	-5.47214	1.6935	-3.23125	0.00123249	0.0277576
ENSG00000160224	AIRE	274.155	-5.47126	1.62346	-3.37012	0.000751357	0.0200864
ENSG00000165194	PCDH19	5.01526	-5.46384	1.47531	-3.70351	0.000212635	0.00919439
ENSG00000227234	SPANXB1	5.71268	-5.45524	1.57485	-3.46397	0.000532274	0.0161081
ENSG00000262006	AC005920.4	2.63291	-5.44215	2.03148	-2.67892	0.00738605	0.0833557
ENSG00000232599	AL008707.1	3.59234	-5.44058	1.84111	-2.95506	0.00312605	0.0485825
ENSG00000134765	DSC1	4.86221	-5.43322	1.33522	-4.06915	4.72e-05	0.00343706
ENSG00000236740	AL033384.1	2.57748	-5.41018	2.03003	-2.66507	0.00769714	0.0853338
ENSG00000261020	AC132825.3	2.55454	-5.3962	2.0911	-2.58055	0.00986428	0.0993105
ENSG00000151640	DPYSL4	34.2909	-5.3957	1.30557	-4.13284	3.58e-05	0.00288329
ENSG00000081148	IMPG2	3.50642	-5.3951	0.864912	-6.23775	4.44e-10	4.88e-07
ENSG00000163884	KLF15	2.54446	-5.39316	2.04577	-2.63625	0.00838285	0.0900074
ENSG00000150244	TRIM48	2.5552	-5.39075	1.49664	-3.6019	0.000315897	0.0117742
ENSG00000134533	RERG	2.53235	-5.38685	1.67415	-3.21766	0.00129242	0.0284136
ENSG00000150051	MKX	2.52407	-5.3812	2.0805	-2.58649	0.00969595	0.0982751
ENSG00000162267	ITIH3	19.8963	-5.37615	1.89694	-2.83411	0.00459531	0.0619149
ENSG00000120251	GRIA2	3.47435	-5.36843	1.21214	-4.42888	9.47e-06	0.00116137
ENSG00000211973	IGHV1-69	68.0286	-5.36835	0.828321	-6.481	9.11e-11	1.22e-07
ENSG00000228919	AC097381.1	3.4285	-5.3581	1.51164	-3.54457	0.000393257	0.0133634
ENSG00000172146	OR1A1	2.49396	-5.35768	1.7807	-3.00875	0.00262326	0.0444238
ENSG00000171587	DSCAM	6.25029	-5.3465	1.44282	-3.7056	0.000210893	0.00915765
ENSG00000184012	TMPRSS2	2.44641	-5.33719	1.83036	-2.91593	0.00354629	0.052642
ENSG00000196990	FAM163B	2.42839	-5.32523	1.68081	-3.16825	0.0015336	0.0313032
ENSG00000150275	PCDH15	4.52717	-5.31757	1.26571	-4.20127	2.65e-05	0.00233476
ENSG00000250208	FZD10-DT	2.40815	-5.31611	1.25731	-4.22816	2.36e-05	0.00216651
ENSG00000227195	MIR663AHG	2.41514	-5.31149	1.8199	-2.91857	0.00351645	0.0523758
ENSG00000264151	AC090403.1	2.40372	-5.30284	1.13882	-4.65644	3.22e-06	0.000544221
ENSG00000147571	CRH	35.9991	-5.30044	1.3705	-3.86752	0.000109948	0.00613515
ENSG00000273706	LHX1	3.27266	-5.30026	1.48251	-3.5752	0.000349957	0.0124269
ENSG00000234389	AC007278.1	4.4652	-5.2999	1.35633	-3.90754	9.32e-05	0.00548883
ENSG00000164647	STEAP1	2.37597	-5.29575	1.07729	-4.91579	8.84e-07	0.000212687
ENSG00000156687	UNC5D	4.43696	-5.29541	1.35491	-3.90832	9.29e-05	0.00548151
ENSG00000239921	LINC01471	2.38164	-5.29435	1.70978	-3.0965	0.00195818	0.0367825
ENSG00000151023	ENKUR	128.299	-5.28531	1.02296	-5.16671	2.38e-07	8.24e-05
ENSG00000226954	AL023802.1	7.81367	-5.28461	1.31879	-4.00716	6.15e-05	0.00409513
ENSG00000123843	C4BPB	2.34549	-5.27802	1.50452	-3.5081	0.000451311	0.0145037
ENSG00000250878	METTL21EP	6.21803	-5.27747	1.73833	-3.03594	0.0023979	0.0419218
ENSG00000149633	KIAA1755	3.2174	-5.2772	1.82325	-2.89439	0.003799	0.0550918
ENSG00000259600	AC066616.2	2.34716	-5.27139	1.74541	-3.02015	0.00252653	0.0433545
ENSG00000132911	NMUR2	2.34723	-5.27128	1.74066	-3.02832	0.00245919	0.0425105
ENSG00000266736	GTF2IP6	2.32585	-5.26594	1.653	-3.18568	0.00144414	0.0302369
ENSG00000007314	SCN4A	26.1039	-5.25526	1.32433	-3.96825	7.24e-05	0.00456445
ENSG00000146166	LGSN	3.15259	-5.24695	1.79212	-2.92779	0.00341382	0.0515158
ENSG00000267731	AC005332.3	65.0437	-5.24296	1.40869	-3.72186	0.00019776	0.00890474
ENSG00000065325	GLP2R	2.29935	-5.24248	1.68708	-3.10742	0.00188725	0.0358881
ENSG00000076344	RGS11	8.42799	-5.24071	1.69152	-3.09823	0.00194683	0.0366587
ENSG00000223648	IGHV3-64	16.1435	-5.23712	1.51806	-3.44987	0.000560865	0.0166192
ENSG00000165164	CFAP47	6.15874	-5.23606	1.57636	-3.32162	0.000894953	0.0223644
ENSG00000255801	AC092746.1	8.41335	-5.23256	1.56257	-3.3487	0.000811927	0.0210234
ENSG00000234177	LINC01114	29.8199	5.22839	1.33497	3.91648	8.99e-05	0.0053653
ENSG00000102290	PCDH11X	4.30575	-5.22727	1.40554	-3.71905	0.000199971	0.00896145
ENSG00000108231	LGI1	2.27275	-5.22419	1.70054	-3.07207	0.0021258	0.0388639
ENSG00000211925	IGHD2-8	6.5791	-5.2241	1.3389	-3.9018	9.55e-05	0.00559776
ENSG00000254177	AC079209.2	4.7867	-5.22036	1.92441	-2.71271	0.00667352	0.078772
ENSG00000254046	IGHV1-17	2.25411	-5.21968	1.6486	-3.16612	0.00154485	0.0314074
ENSG00000135903	PAX3	3.11235	-5.20881	1.84001	-2.83087	0.00464217	0.0623282
ENSG00000272634	OR51F5P	2.24418	-5.20602	1.64887	-3.15732	0.00159224	0.0320676
ENSG00000243016	AC112482.1	4.12647	-5.20172	1.28159	-4.05881	4.93e-05	0.00350701
ENSG00000203757	OR6K3	2.23984	-5.20106	1.29423	-4.01864	5.85e-05	0.00394331
ENSG00000072832	CRMP1	543.282	-5.20086	1.11003	-4.68534	2.79e-06	0.000509163
ENSG00000196565	HBG2	9.21491	5.19668	1.6712	3.10954	0.00187376	0.0357419
ENSG00000270691	AL161912.3	2.21932	-5.1952	1.62502	-3.19702	0.00138857	0.0296258
ENSG00000274373	AC148476.1	31.2552	5.19346	1.20804	4.29907	1.72e-05	0.00172973
ENSG00000039537	C6	2.22395	-5.19336	1.70546	-3.04514	0.00232576	0.0412936
ENSG00000187957	DNER	4.17308	-5.19001	1.7513	-2.96352	0.00304144	0.0481336
ENSG00000254810	AP001189.3	23.9135	-5.1855	1.49148	-3.47674	0.000507552	0.0155793
ENSG00000234377	RNF219-AS1	2.19607	-5.17752	1.74686	-2.96389	0.00303772	0.0481336
ENSG00000262714	AC007342.5	3.48695	-5.17267	1.34489	-3.84616	0.000119983	0.00642422
ENSG00000240666	MME-AS1	2.98185	-5.17136	1.77736	-2.90958	0.00361915	0.0533602
ENSG00000178358	OR2D3	2.18513	-5.16689	1.72633	-2.99299	0.00276256	0.045658
ENSG00000181355	OFCC1	3.01603	-5.1648	1.5313	-3.37282	0.000744035	0.0199709
ENSG00000232079	LINC01697	2.18512	-5.16459	1.16244	-4.44287	8.88e-06	0.00111091
ENSG00000285079	AL513493.1	56.3702	-5.1613	1.68875	-3.05629	0.00224098	0.0403931
ENSG00000279622	AC025280.2	4.02498	-5.15822	1.64683	-3.13221	0.00173497	0.0340438
ENSG00000260810	AL135818.2	2.15897	-5.15226	1.73	-2.97818	0.00289965	0.0469604
ENSG00000173077	2022-12-01	2.14748	-5.15102	1.68808	-3.05141	0.00227766	0.0408639
ENSG00000134207	SYT6	2.95588	-5.14664	1.45944	-3.52644	0.000421182	0.0140183
ENSG00000237763	AMY1A	2.14943	-5.14257	1.43644	-3.58009	0.000343474	0.0123695
ENSG00000280155	AL021408.2	7.49611	-5.14088	1.35808	-3.7854	0.000153465	0.00759103
ENSG00000231482	AC141930.2	2.11985	-5.13119	1.7948	-2.85892	0.00425089	0.0592688
ENSG00000229950	TFAP2A-AS1	5.50395	-5.13097	1.15988	-4.42371	9.7e-06	0.00117088
ENSG00000279917	AC079331.2	6.38376	-5.12924	1.73121	-2.96281	0.00304844	0.0481336
ENSG00000223849	AL354893.1	2.11147	-5.12611	1.64224	-3.12141	0.00179989	0.0348511
ENSG00000166073	GPR176	790.792	-5.11323	1.17441	-4.35387	1.34e-05	0.00146028
ENSG00000187621	TCL6	228.789	-5.10195	1.38409	-3.68615	0.000227675	0.00968153
ENSG00000138650	PCDH10	2.08398	-5.09797	1.82638	-2.7913	0.00524963	0.0674262
ENSG00000235300	AC090627.1	5.95319	-5.09177	1.85058	-2.75144	0.00593334	0.0727188
ENSG00000212766	EWSAT1	2.0606	-5.09127	1.66624	-3.05554	0.00224656	0.0404473
ENSG00000254350	AC091979.1	3.82798	-5.08483	1.88502	-2.69749	0.0069864	0.0813249
ENSG00000253737	AP003469.3	3.36041	-5.08062	1.35275	-3.75577	0.00017281	0.00828707
ENSG00000214039	LINC02418	2.04912	-5.07492	1.69991	-2.9854	0.00283204	0.0463531
ENSG00000132204	LINC00470	2.81997	-5.07207	1.8635	-2.7218	0.00649271	0.0773859
ENSG00000161405	IKZF3	66.5882	-5.07015	1.36361	-3.71817	0.00020067	0.00896666
ENSG00000278831	AL513190.1	23.0739	-5.05361	1.67707	-3.01336	0.00258376	0.0439711
ENSG00000103460	TOX3	1.99908	-5.04708	1.67828	-3.00729	0.00263586	0.0445146
ENSG00000263667	AL035696.3	22.8082	-5.04357	1.14637	-4.39959	1.08e-05	0.0012696
ENSG00000105143	SLC1A6	196.558	-5.03995	1.30686	-3.85654	0.000115004	0.00630003
ENSG00000167634	NLRP7	5.20815	-5.03848	1.10641	-4.55388	5.27e-06	0.00076844
ENSG00000183662	FAM19A1	2.3663	-5.03837	1.87547	-2.68645	0.00722149	0.0824964
ENSG00000111863	ADTRP	35.0036	-5.0296	1.60485	-3.13399	0.00172447	0.0339196
ENSG00000255134	OR8K2P	2.7264	-5.0261	1.51719	-3.31276	0.000923812	0.0228262
ENSG00000004846	ABCB5	2.75512	-5.02468	1.93272	-2.5998	0.00932779	0.096013
ENSG00000259351	AC015914.1	2.32035	-5.0182	1.23173	-4.0741	4.62e-05	0.00340547
ENSG00000179520	SLC17A8	12.8576	-5.01424	1.61047	-3.11353	0.00184863	0.0354603
ENSG00000279400	AC008957.3	1.94402	-5.00687	1.64575	-3.0423	0.00234776	0.0414691
ENSG00000175161	CADM2	10.8612	-4.99389	0.726173	-6.877	6.11e-12	1.05e-08
ENSG00000219088	Z97206.1	2.63412	-4.99363	1.76074	-2.83609	0.00456692	0.0615742
ENSG00000270990	AC069304.2	1.92454	-4.99092	1.66295	-3.00124	0.00268883	0.0450877
ENSG00000177138	FAM9B	1.92039	-4.98438	1.58423	-3.14625	0.00165379	0.0328698
ENSG00000253456	AC136424.1	11.3054	-4.9835	1.89011	-2.63662	0.00837377	0.0900074
ENSG00000279846	AC015660.5	13.8163	-4.97791	1.28967	-3.85983	0.000113468	0.00625781
ENSG00000272568	AC005162.3	2.59985	-4.97416	1.45603	-3.41624	0.000634915	0.0180785
ENSG00000162598	C1orf87	1.90296	-4.9741	1.6331	-3.04581	0.00232056	0.0412562
ENSG00000080293	SCTR	2.25313	-4.9722	1.19377	-4.16513	3.11e-05	0.00263915
ENSG00000281990	IGHV1-69-2	38.021	-4.96349	1.35744	-3.65652	0.00025566	0.0103905
ENSG00000284695	AC108941.2	5.80776	4.96101	1.37032	3.62032	0.000294239	0.0113376
ENSG00000186160	CYP4Z1	2.6697	-4.96004	1.55928	-3.18098	0.00146777	0.0304709
ENSG00000135454	B4GALNT1	2.60074	-4.95996	1.84869	-2.68296	0.00729738	0.0829414
ENSG00000250850	AL161781.2	1.88122	-4.95789	1.1857	-4.18139	2.9e-05	0.00249159
ENSG00000181097	AC105219.1	3.63617	-4.95694	0.976186	-5.07786	3.82e-07	0.0001165
ENSG00000211672	IGLV4-3	9.41695	-4.95062	1.79025	-2.76532	0.00568664	0.0708804
ENSG00000177511	ST8SIA3	3.59729	-4.94007	1.36439	-3.62072	0.000293782	0.0113376
ENSG00000115290	GRB14	31.461	-4.93205	1.13254	-4.35485	1.33e-05	0.00146028
ENSG00000158816	VWA5B1	2.18372	-4.93051	1.88993	-2.60883	0.00908511	0.0946542
ENSG00000166349	RAG1	1201.44	-4.92978	1.52407	-3.23462	0.00121803	0.0275327
ENSG00000253819	LINC01151	2.58115	-4.92673	1.19576	-4.12018	3.79e-05	0.00298884
ENSG00000224618	AC096921.1	2.98814	-4.92393	1.61612	-3.04676	0.00231319	0.0411892
ENSG00000125207	PIWIL1	1.84471	-4.92355	1.78561	-2.75734	0.00582732	0.0719638
ENSG00000205628	LINC01446	2.55213	-4.92153	1.83164	-2.68695	0.00721067	0.0824964
ENSG00000241721	SUMO1P1	3.46778	-4.92133	1.50768	-3.26418	0.00109782	0.0254674
ENSG00000254098	IGKV2-26	26.347	-4.92051	1.0416	-4.724	2.31e-06	0.000444966
ENSG00000120471	TP53AIP1	2.54539	-4.91263	1.84165	-2.66752	0.0076413	0.0851131
ENSG00000173626	TRAPPC3L	17.2762	-4.91162	1.5974	-3.07475	0.00210676	0.0387713
ENSG00000134258	VTCN1	1.82672	-4.90747	1.81281	-2.70711	0.00678709	0.0795941
ENSG00000197614	MFAP5	6.30138	-4.90687	1.35597	-3.61872	0.000296064	0.0113511
ENSG00000164330	EBF1	3221.33	-4.89834	1.10928	-4.41579	1.01e-05	0.00119684
ENSG00000242741	LINC02005	1.81495	-4.89539	1.22757	-3.98788	6.67e-05	0.0043028
ENSG00000139767	SRRM4	2.89471	-4.89444	1.04453	-4.68578	2.79e-06	0.000509163
ENSG00000103154	NECAB2	21.6615	-4.88965	1.45928	-3.35072	0.000806011	0.0209583
ENSG00000214290	COLCA2	1.79121	-4.88616	1.67737	-2.91299	0.0035799	0.0530132
ENSG00000161180	CCDC116	8.02908	-4.88578	1.72814	-2.8272	0.00469569	0.0628822
ENSG00000268916	CSAG3	2.47824	-4.87558	1.7871	-2.7282	0.00636806	0.0765346
ENSG00000256751	PLBD1-AS1	1.78651	-4.87441	1.47836	-3.29719	0.000976587	0.0236742
ENSG00000183242	WT1-AS	58.9898	4.86748	1.16205	4.18871	2.81e-05	0.00245374
ENSG00000100985	MMP9	9521.51	-4.86721	0.959008	-5.07526	3.87e-07	0.000116801
ENSG00000211978	IGHV5-78	155.048	-4.86333	1.45966	-3.33181	0.000862817	0.0219171
ENSG00000135502	SLC26A10	3.30481	-4.85103	1.59066	-3.04969	0.00229076	0.0410749
ENSG00000254997	KRTAP5-9	4.13045	-4.84003	1.57986	-3.06358	0.00218703	0.0396537
ENSG00000231419	LINC00689	1.73806	-4.83922	1.48106	-3.2674	0.00108539	0.0252847
ENSG00000171495	MROH2B	2.78871	-4.83846	1.6312	-2.9662	0.00301503	0.0480411
ENSG00000160963	COL26A1	6.50905	-4.83436	1.82576	-2.64786	0.00810034	0.088278
ENSG00000144908	ALDH1L1	1.73115	-4.83422	1.77482	-2.72378	0.00645388	0.0770736
ENSG00000231574	LINC02015	1.73741	-4.83378	1.82727	-2.64536	0.00816034	0.0887961
ENSG00000241186	TDGF1	1.73451	-4.83256	1.80096	-2.68333	0.00728937	0.0829414
ENSG00000276778	LINC02227	59.195	-4.83132	1.54677	-3.12348	0.00178725	0.0347154
ENSG00000135116	HRK	55.8443	-4.83076	1.48898	-3.24435	0.00117718	0.0267914
ENSG00000226003	PPIAP37	2.66127	4.82987	1.7715	2.72643	0.00640238	0.0767633
ENSG00000205517	RGL3	63.2302	-4.82564	1.72175	-2.80275	0.00506694	0.0659418
ENSG00000231690	LINC00574	2.38766	-4.8254	1.41286	-3.41535	0.000636991	0.0180848
ENSG00000262952	AC139099.3	7.079	4.82256	1.25087	3.85536	0.000115562	0.00631935
ENSG00000132793	LPIN3	8.15553	-4.82104	0.964819	-4.99683	5.83e-07	0.00015739
ENSG00000234184	LINC01781	5.86396	-4.81376	0.965103	-4.98782	6.11e-07	0.000162072
ENSG00000145451	GLRA3	1.71643	-4.81356	1.44722	-3.32607	0.000880797	0.0221364
ENSG00000141497	ZMYND15	165.133	-4.80615	1.38836	-3.46174	0.000536686	0.0161357
ENSG00000229020	AKR7A2P1	1.69384	-4.80461	1.63474	-2.93907	0.00329194	0.0501733
ENSG00000248210	LINC02355	2.39999	-4.80277	1.44099	-3.33296	0.000859268	0.021863
ENSG00000250955	AC008592.2	1.69399	-4.8002	1.72052	-2.78997	0.00527132	0.0675949
ENSG00000135750	KCNK1	59.5582	4.7961	1.69709	2.82607	0.00471226	0.0629672
ENSG00000234345	AC234782.3	4.3796	-4.79607	1.00776	-4.75915	1.94e-06	0.000396382
ENSG00000168995	SIGLEC7	244.59	-4.79522	1.02653	-4.67127	2.99e-06	0.000523606
ENSG00000124429	POF1B	3.15569	-4.78998	1.3498	-3.54867	0.000387184	0.013289
ENSG00000102271	KLHL4	7.53996	-4.78924	1.29767	-3.69065	0.000223682	0.00955133
ENSG00000152192	POU4F1	33.3215	-4.78577	1.23922	-3.86191	0.000112504	0.00624085
ENSG00000172061	LRRC15	2.31847	-4.78248	1.842	-2.59635	0.00942192	0.0964822
ENSG00000203506	RBMS3-AS2	1.96395	-4.78197	1.46657	-3.26065	0.00111157	0.0256729
ENSG00000230876	LINC00486	1.67299	-4.78173	1.71173	-2.79351	0.00521401	0.0670806
ENSG00000205363	C15orf59	10.6703	-4.77595	1.51017	-3.16252	0.00156412	0.0316599
ENSG00000265203	RBP3	1.65708	-4.77519	1.70302	-2.80396	0.00504791	0.0657681
ENSG00000022355	GABRA1	1.64536	-4.75961	1.8	-2.64422	0.00818789	0.0889191
ENSG00000109794	FAM149A	16.7652	-4.75902	1.14823	-4.14465	3.4e-05	0.00282248
ENSG00000186188	FFAR4	7.43671	-4.75897	1.38899	-3.4262	0.000612082	0.017744
ENSG00000164161	HHIP	409.857	-4.75873	1.20757	-3.94076	8.12e-05	0.00494205
ENSG00000185352	HS6ST3	1.65042	-4.75799	1.38923	-3.42493	0.000614968	0.0177859
ENSG00000148346	LCN2	3127.56	-4.75755	0.819647	-5.80439	6.46e-09	4.42e-06
ENSG00000174914	OR9G1	4.26614	-4.75276	1.37288	-3.46189	0.000536387	0.0161357
ENSG00000186081	KRT5	1.62968	-4.75174	1.81125	-2.62346	0.00870413	0.0921845
ENSG00000162670	BRINP3	2.26838	-4.74004	1.54161	-3.07474	0.00210688	0.0387713
ENSG00000099725	PRKY	412.911	4.73919	1.05164	4.50648	6.59e-06	0.000893915
ENSG00000105976	MET	108.321	-4.73717	1.24777	-3.79652	0.00014674	0.00738183
ENSG00000164047	CAMP	2199.59	-4.73681	0.95976	-4.93541	8e-07	0.000195427
ENSG00000249881	AC008696.2	50.8238	-4.73577	1.37307	-3.44904	0.000562585	0.0166222
ENSG00000250221	KRT8P32	2.49087	4.73173	1.50339	3.14737	0.00164749	0.0328611
ENSG00000006788	MYH13	2.26116	-4.73069	1.70456	-2.77531	0.00551487	0.0695435
ENSG00000095777	MYO3A	1.60775	-4.72917	1.78921	-2.64317	0.00821347	0.0889936
ENSG00000165061	ZMAT4	2.22549	-4.72476	1.51003	-3.12892	0.00175452	0.0342527
ENSG00000004948	CALCR	4.26935	-4.72219	1.18831	-3.97387	7.07e-05	0.00449813
ENSG00000134115	CNTN6	2.24617	-4.7201	1.6778	-2.81327	0.00490404	0.0647153
ENSG00000227523	RPS20P15	9.87573	-4.71395	1.39575	-3.37737	0.000731831	0.0197919
ENSG00000250770	AC005865.2	3.56584	-4.71152	1.28421	-3.66882	0.000243668	0.0101365
ENSG00000166342	NETO1	1.58955	-4.71081	1.65712	-2.84278	0.00447222	0.0607852
ENSG00000171533	MAP6	2.56776	-4.70843	1.64319	-2.86542	0.00416455	0.0584651
ENSG00000164694	FNDC1	6.2981	-4.70501	0.929371	-5.06258	4.14e-07	0.000122443
ENSG00000223442	TH2LCRR	4.85478	-4.70352	1.5784	-2.97992	0.00288319	0.0467676
ENSG00000224539	SAGE4P	3.55733	-4.69816	1.38865	-3.38326	0.000716315	0.019477
ENSG00000240671	IGKV1-8	124.566	-4.69473	1.01577	-4.62186	3.8e-06	0.000626149
ENSG00000080224	EPHA6	1.55445	-4.67592	1.80083	-2.59653	0.00941697	0.0964822
ENSG00000101162	TUBB1	3105.33	-4.67501	0.85047	-5.49697	3.86e-08	1.96e-05
ENSG00000245812	LINC02202	66.6133	-4.67437	1.55246	-3.01094	0.00260441	0.0442261
ENSG00000224272	AC131097.3	66.8879	4.67427	1.37335	3.40356	0.000665129	0.0184743
ENSG00000283063	TRBV6-2	9.22658	-4.67023	1.63366	-2.85875	0.00425318	0.0592688
ENSG00000211933	IGHV6-1	108.374	-4.66518	1.05894	-4.40554	1.06e-05	0.00123997
ENSG00000261024	AL078644.1	1.53573	-4.66357	1.24323	-3.75115	0.000176022	0.00833194
ENSG00000165905	LARGE2	230.495	-4.65822	1.25923	-3.69927	0.000216223	0.00932334
ENSG00000237380	HOXD-AS2	1.53258	-4.65818	1.41585	-3.29001	0.00100182	0.0239911
ENSG00000178795	GDPD4	2.49868	-4.64484	1.67149	-2.77887	0.00545492	0.0692299
ENSG00000257539	HSPA8P14	2.57497	-4.64117	1.45157	-3.19734	0.00138701	0.0296154
ENSG00000186244	AC091180.1	1.50728	-4.64026	1.67787	-2.76556	0.0056825	0.0708791
ENSG00000215196	BASP1-AS1	4.19303	-4.63898	1.3419	-3.45703	0.000546161	0.0163091
ENSG00000227491	CCNJP1	2.40065	4.63848	1.30562	3.55269	0.000381308	0.0131755
ENSG00000254489	AL136088.1	18.104	-4.63838	1.42567	-3.25346	0.00114007	0.0260961
ENSG00000234255	AC012370.2	1.80476	-4.6367	1.24787	-3.71568	0.000202661	0.00900335
ENSG00000270641	TSIX	9.50403	-4.63304	1.33516	-3.47002	0.000520423	0.0158323
ENSG00000250410	AC112722.1	1.77986	-4.62703	1.24541	-3.71527	0.000202989	0.00900491
ENSG00000230453	ANKRD18B	105.245	4.62123	1.11511	4.14417	3.41e-05	0.00282248
ENSG00000280953	AL390763.2	37.0648	-4.62094	1.70222	-2.71466	0.00663444	0.0784788
ENSG00000230894	AL133284.1	2.09501	-4.61898	1.46236	-3.15858	0.00158539	0.0320062
ENSG00000258539	AC068896.1	40.668	-4.61808	1.43952	-3.20806	0.00133633	0.0289933
ENSG00000167244	IGF2	12.8465	-4.61477	1.23427	-3.73888	0.00018484	0.0085832
ENSG00000064692	SNCAIP	13.6392	-4.61314	1.11371	-4.14213	3.44e-05	0.00284017
ENSG00000186529	CYP4F3	200.821	-4.60991	1.28506	-3.58731	0.000334108	0.0121586
ENSG00000173809	TDRD12	14.9862	-4.6089	1.61783	-2.84882	0.00438819	0.0601511
ENSG00000218713	AL512378.1	3.94149	-4.60443	1.50478	-3.05988	0.00221426	0.0400531
ENSG00000251226	AP001999.1	3.7792	-4.60347	1.70809	-2.6951	0.00703671	0.081727
ENSG00000008516	MMP25	398.822	-4.60224	0.729751	-6.30659	2.85e-10	3.51e-07
ENSG00000138135	CH25H	66.5034	-4.59733	1.54385	-2.97783	0.00290295	0.046989
ENSG00000250979	AC022905.1	1.76004	-4.59577	1.27901	-3.59322	0.000326623	0.012014
ENSG00000273123	AC020634.1	4.12199	-4.59285	1.46937	-3.12572	0.0017737	0.0344959
ENSG00000230387	AL118508.1	121.795	4.59038	1.22143	3.75819	0.000171146	0.0082458
ENSG00000265929	MIR5195	124.984	-4.59018	1.36833	-3.35459	0.000794825	0.0208068
ENSG00000273079	GRIN2B	5.34975	-4.58955	1.41602	-3.24117	0.0011904	0.0270376
ENSG00000112175	BMP5	68.1723	-4.58635	1.39275	-3.29301	0.000991215	0.0238784
ENSG00000266356	AC090615.1	6.60918	-4.58236	1.68059	-2.72664	0.00639829	0.0767633
ENSG00000112837	TBX18	2.03903	-4.58009	1.52381	-3.00568	0.00264992	0.0446546
ENSG00000110777	POU2AF1	1048.86	-4.57984	1.2648	-3.62099	0.000293477	0.0113376
ENSG00000007174	DNAH9	4.95481	-4.57499	1.61728	-2.82881	0.00467213	0.0627031
ENSG00000261445	AC018558.3	1.4468	-4.57051	1.76656	-2.58724	0.00967475	0.0982499
ENSG00000248150	LINC02150	2.38445	-4.56781	1.28226	-3.56232	0.000367592	0.0128541
ENSG00000146648	EGFR	23.2976	-4.56105	1.22939	-3.71001	0.000207254	0.00909335
ENSG00000110446	SLC15A3	462.887	-4.55948	0.998783	-4.56504	4.99e-06	0.00074277
ENSG00000243264	IGKV2D-29	94.0659	-4.55937	1.25789	-3.62463	0.00028938	0.0112631
ENSG00000277435	AC138649.2	26.8828	-4.54975	1.26209	-3.60494	0.000312228	0.0117084
ENSG00000278924	AC078883.4	10.7446	4.54829	1.477	3.07942	0.00207403	0.0383304
ENSG00000138615	CILP	10.9493	-4.54624	1.67194	-2.71915	0.00654504	0.0776953
ENSG00000117834	SLC5A9	1.98571	-4.54592	1.53673	-2.95817	0.00309468	0.0483699
ENSG00000227196	IGHD4-23	5.58035	-4.54267	1.16511	-3.89891	9.66e-05	0.0056321
ENSG00000144644	GADL1	3.69632	-4.53724	1.39282	-3.25758	0.00112365	0.0258741
ENSG00000138755	CXCL9	23.0851	-4.53709	1.20984	-3.75016	0.000176725	0.00833204
ENSG00000218336	TENM3	3.1939	-4.53648	1.68484	-2.69253	0.00709119	0.0818924
ENSG00000250174	MYLK-AS2	1.96566	-4.5341	1.18804	-3.81646	0.000135382	0.00698158
ENSG00000155980	KIF5A	9.45966	-4.52833	1.23075	-3.67932	0.000233853	0.00986935
ENSG00000128218	VPREB3	1184.35	-4.52616	1.16525	-3.88428	0.000102635	0.00588422
ENSG00000178217	SH2D4B	363.784	-4.52563	1.58799	-2.84992	0.00437304	0.0600236
ENSG00000117594	HSD11B1	13.2084	-4.52116	1.5888	-2.84564	0.00443219	0.0604849
ENSG00000260192	LINC02240	1.92763	-4.5175	1.12607	-4.01175	6.03e-05	0.00403374
ENSG00000233926	AL591368.1	1.66467	-4.51504	1.22316	-3.69129	0.000223117	0.00954112
ENSG00000211728	TRBV5-6	11.0385	-4.51314	1.35323	-3.33508	0.000852762	0.0217695
ENSG00000232190	LINC02181	1.37169	-4.50182	1.6819	-2.67663	0.00743662	0.0835893
ENSG00000227006	AL136988.2	2.93652	-4.50029	1.35763	-3.3148	0.000917075	0.0227327
ENSG00000133687	TMTC1	88.7039	-4.49961	0.882664	-5.09775	3.44e-07	0.000111386
ENSG00000158497	HMHB1	27.2428	-4.49583	0.977201	-4.60072	4.21e-06	0.000670954
ENSG00000083067	TRPM3	5.51491	-4.49349	1.25939	-3.56799	0.000359732	0.0126284
ENSG00000226455	AL121787.1	13.7043	-4.49153	1.12975	-3.97569	7.02e-05	0.00447301
ENSG00000243478	AOX2P	322.547	-4.49103	1.19739	-3.75068	0.000176358	0.00833194
ENSG00000055732	MCOLN3	8.48145	-4.48626	1.40313	-3.19732	0.00138712	0.0296154
ENSG00000227220	AL133346.1	16.9218	-4.48594	1.3377	-3.35348	0.000798029	0.0208211
ENSG00000256581	NLRP9P1	3.50543	-4.48587	1.55977	-2.87598	0.00402777	0.0572761
ENSG00000280048	AC012409.5	3.06502	-4.48403	1.35174	-3.31723	0.000909138	0.0226493
ENSG00000182836	PLCXD3	2.58479	-4.48107	1.57126	-2.85189	0.00434604	0.05985
ENSG00000140398	NEIL1	1816.93	-4.4794	0.676661	-6.61985	3.6e-11	5.03e-08
ENSG00000228495	LINC01013	206.397	-4.47932	1.66866	-2.68439	0.00726624	0.082854
ENSG00000188153	COL4A5	556.325	4.47893	1.16945	3.82996	0.000128164	0.00671054
ENSG00000234948	LINC01524	1.88339	-4.47658	1.64345	-2.72389	0.00645181	0.0770736
ENSG00000187079	TEAD1	13.2606	-4.47362	1.09924	-4.06973	4.71e-05	0.00343706
ENSG00000227722	AL022100.1	4.41666	-4.46537	1.52024	-2.93729	0.003311	0.0504382
ENSG00000167767	KRT80	27.0764	4.4538	1.50221	2.96484	0.00302842	0.0481336
ENSG00000147689	FAM83A	334.777	4.45196	1.16157	3.83271	0.000126742	0.00664736
ENSG00000236333	TRHDE-AS1	17.3723	-4.45051	1.56678	-2.84054	0.00450367	0.0610543
ENSG00000170370	EMX2	2.17824	-4.44847	1.48954	-2.98647	0.00282217	0.0462458
ENSG00000278513	AC091046.2	1.85204	-4.4471	1.66156	-2.67646	0.00744054	0.0836029
ENSG00000197768	STPG3	3.38831	-4.44661	1.0021	-4.43731	9.11e-06	0.00113083
ENSG00000184349	EFNA5	5.34997	-4.43996	1.21412	-3.65693	0.000255259	0.0103905
ENSG00000223806	LINC00114	84.2512	-4.43681	1.35275	-3.27985	0.00103863	0.0245554
ENSG00000236776	RPL21P23	1.31182	-4.43272	1.29464	-3.4239	0.000617297	0.0178114
ENSG00000228999	AC068490.1	1.30561	-4.43003	1.6901	-2.62116	0.0087632	0.0923948
ENSG00000267136	AP005131.1	16.835	-4.42946	1.32482	-3.34343	0.000827489	0.0213009
ENSG00000070159	PTPN3	1.29869	-4.42533	1.39621	-3.16954	0.00152683	0.0312128
ENSG00000238152	OR7E140P	3.33076	-4.42427	1.70018	-2.60224	0.00926172	0.0955229
ENSG00000246820	AC091013.1	1.85554	-4.42293	1.65083	-2.67921	0.00737963	0.0833557
ENSG00000149972	CNTN5	1.84592	-4.4167	1.44362	-3.05946	0.0022174	0.0400863
ENSG00000229314	ORM1	222.271	-4.4161	1.12899	-3.91153	9.17e-05	0.00542989
ENSG00000021645	NRXN3	83.2735	-4.41429	1.37227	-3.21677	0.00129641	0.0284136
ENSG00000135144	DTX1	543.291	-4.41003	1.32386	-3.33119	0.000864754	0.0219351
ENSG00000156738	MS4A1	175.752	-4.40835	1.20624	-3.65463	0.000257552	0.0104058
ENSG00000006071	ABCC8	6.78012	-4.40769	1.02112	-4.31651	1.59e-05	0.0016213
ENSG00000113600	C9	1.78779	-4.40375	1.27331	-3.45849	0.000543215	0.0162526
ENSG00000122641	INHBA	1188.74	4.39629	0.85173	5.16161	2.45e-07	8.28e-05
ENSG00000241244	IGKV1D-16	50.7537	-4.38564	0.905715	-4.84219	1.28e-06	0.000282395
ENSG00000244062	AC080128.1	1.79102	-4.3851	1.22874	-3.56877	0.000358654	0.0126248
ENSG00000115705	TPO	62.4446	-4.38429	1.31664	-3.3299	0.000868763	0.0219945
ENSG00000213934	HBG1	71.8397	4.38351	1.0794	4.06106	4.89e-05	0.00349621
ENSG00000256128	LINC00944	4.08044	-4.37773	1.17903	-3.71298	0.000204834	0.00904767
ENSG00000274576	IGHV2-70	51.6081	-4.36999	0.914117	-4.78056	1.75e-06	0.000361721
ENSG00000276298	AC234782.4	1.76224	-4.36568	1.35659	-3.21814	0.00129026	0.0284136
ENSG00000215483	LINC00598	11.6606	-4.36443	1.04327	-4.18341	2.87e-05	0.00248299
ENSG00000175920	DOK7	1.49484	-4.36418	1.45387	-3.00177	0.00268418	0.0450343
ENSG00000212939	Z97192.1	2.42844	-4.36063	1.54555	-2.82141	0.00478133	0.0635865
ENSG00000284999	AL591518.1	2.44281	-4.35694	1.65557	-2.63169	0.00849609	0.0907596
ENSG00000258947	TUBB3	1.4824	-4.35625	1.52662	-2.85353	0.0043237	0.0596656
ENSG00000137877	SPTBN5	10.6421	-4.35542	1.37318	-3.17177	0.00151514	0.0310618
ENSG00000127083	OMD	15.2471	-4.35263	1.03343	-4.21183	2.53e-05	0.00228697
ENSG00000228030	AC019084.1	1.78497	-4.33772	1.21203	-3.57889	0.000345053	0.0123803
ENSG00000239839	DEFA3	4443.98	-4.33693	0.968425	-4.47834	7.52e-06	0.000972873
ENSG00000236138	DUX4L26	6.57727	-4.33636	1.01833	-4.25831	2.06e-05	0.00196327
ENSG00000170374	SP7	7.08882	-4.33328	1.12276	-3.85949	0.000113623	0.00625781
ENSG00000180871	CXCR2	557.026	-4.33296	0.961713	-4.50546	6.62e-06	0.0008943
ENSG00000235151	AC131097.4	929.877	4.33159	0.986354	4.39152	1.13e-05	0.00131269
ENSG00000277007	AC096642.1	3.31474	-4.32438	1.4993	-2.88427	0.00392326	0.0562054
ENSG00000117016	RIMS3	607.019	-4.30639	0.922941	-4.66594	3.07e-06	0.000525445
ENSG00000126895	AVPR2	8.36223	-4.29741	0.80834	-5.31635	1.06e-07	4.29e-05
ENSG00000275549	STPG3-AS1	2.90402	-4.29043	1.33364	-3.21708	0.00129502	0.0284136
ENSG00000240668	KRT8P36	9.57974	4.28863	1.50457	2.8504	0.00436642	0.0599594
ENSG00000120051	CFAP58	17.8381	-4.28799	1.13772	-3.76893	0.000163949	0.00799922
ENSG00000165349	SLC7A3	75.0732	-4.28498	1.45203	-2.95103	0.00316718	0.0489955
ENSG00000270839	AC091393.1	4.67037	-4.28316	1.36475	-3.13841	0.00169866	0.0335021
ENSG00000152463	OLAH	10.4287	-4.28182	1.21436	-3.526	0.000421886	0.0140266
ENSG00000272576	AC027271.1	2.26673	-4.2814	1.59602	-2.68256	0.00730617	0.0829414
ENSG00000258181	AC008083.2	2.27507	-4.2811	1.40507	-3.04689	0.00231225	0.0411892
ENSG00000128573	FOXP2	7.30183	-4.27777	1.21601	-3.51786	0.000435035	0.0142635
ENSG00000145242	EPHA5	1.6813	-4.27444	1.42638	-2.9967	0.00272919	0.0454424
ENSG00000225937	PCA3	5.13536	-4.27265	1.23404	-3.46233	0.000535529	0.0161357
ENSG00000165078	CPA6	31.7593	4.27065	1.06816	3.99814	6.38e-05	0.00419979
ENSG00000242686	AC107464.1	1.68222	-4.26997	1.14689	-3.7231	0.000196789	0.00890474
ENSG00000169894	MUC3A	2.31339	-4.26219	1.42831	-2.98409	0.00284425	0.0464366
ENSG00000132821	VSTM2L	4.23059	-4.26192	1.64159	-2.59621	0.00942586	0.0964822
ENSG00000285367	AC087564.1	1.96354	-4.24964	1.60461	-2.64839	0.00808756	0.0881699
ENSG00000283384	AL138694.1	3.07646	-4.24645	1.52698	-2.78095	0.00542009	0.0689253
ENSG00000133063	CHIT1	323.707	-4.2429	1.33485	-3.17856	0.00148009	0.0305904
ENSG00000240247	DEFA1B	1598.3	-4.24246	0.999533	-4.24444	2.19e-05	0.00205317
ENSG00000206047	DEFA1	1598.02	-4.24217	0.999531	-4.24417	2.19e-05	0.00205317
ENSG00000010310	GIPR	15.4981	-4.23585	1.27214	-3.32971	0.000869371	0.0219945
ENSG00000211911	IGHD3-22	8.23169	-4.23358	0.874796	-4.83951	1.3e-06	0.000284205
ENSG00000186417	GLDN	56.1548	-4.2319	1.15713	-3.65725	0.000254938	0.0103905
ENSG00000105507	CABP5	73.4248	-4.23051	1.35915	-3.11261	0.00185444	0.0355274
ENSG00000131620	ANO1	18.9985	-4.22817	1.59496	-2.65096	0.00802642	0.0877372
ENSG00000111799	COL12A1	10.6804	-4.22538	1.60776	-2.62812	0.0085858	0.0913899
ENSG00000182752	PAPPA	36.5662	-4.22363	1.39187	-3.03449	0.00240943	0.0420278
ENSG00000137265	IRF4	639.369	-4.22308	1.22377	-3.45087	0.000558775	0.0165892
ENSG00000240219	AL512306.2	49.0432	-4.22113	1.52566	-2.76676	0.00566166	0.0707409
ENSG00000096006	CRISP3	1071.07	-4.22092	0.847528	-4.98027	6.35e-07	0.000165736
ENSG00000134121	CHL1	166.858	-4.21829	1.22082	-3.45531	0.000549665	0.0163819
ENSG00000094963	FMO2	311.79	-4.21764	1.21625	-3.46774	0.000524853	0.0159356
ENSG00000184304	PRKD1	27.9913	-4.21501	1.18671	-3.55184	0.000382545	0.0131886
ENSG00000240563	L1TD1	1.60587	-4.21474	1.2544	-3.35996	0.000779533	0.0206359
ENSG00000250334	LINC00989	168.615	-4.214	1.23546	-3.41087	0.000647557	0.0182902
ENSG00000211966	IGHV5-51	240.335	-4.20226	0.959071	-4.3816	1.18e-05	0.00135846
ENSG00000218073	AL021407.3	1.12417	-4.20045	1.45544	-2.88604	0.00390124	0.055968
ENSG00000104237	RP1	4.62796	-4.19357	1.61084	-2.60335	0.00923179	0.0954301
ENSG00000263482	ANTXRLP1	52.5673	-4.19004	1.46961	-2.85112	0.00435651	0.05985
ENSG00000189056	RELN	4.43988	-4.18803	1.43866	-2.91106	0.00360211	0.0532363
ENSG00000198643	FAM3D	7.16462	-4.1782	1.42479	-2.9325	0.00336242	0.0509945
ENSG00000116141	MARK1	17.5739	-4.17654	1.39944	-2.98442	0.00284112	0.0464366
ENSG00000255753	AC009533.2	1.53088	-4.17486	1.24304	-3.35859	0.000783402	0.0206726
ENSG00000204936	CD177	785.148	-4.17349	1.34505	-3.10285	0.00191669	0.0362241
ENSG00000223929	MIR4432HG	62.9098	-4.17138	1.16538	-3.57943	0.00034435	0.0123803
ENSG00000175967	FO393415.1	4.34878	-4.16402	1.54913	-2.68797	0.00718872	0.0824791
ENSG00000185436	IFNLR1	28.4836	-4.16354	1.5125	-2.75275	0.00590977	0.0725165
ENSG00000262953	EIF4A1P9	1.67613	4.16349	1.12351	3.70579	0.000210731	0.00915765
ENSG00000163221	S100A12	4285.21	-4.15983	0.967729	-4.29855	1.72e-05	0.00172973
ENSG00000169575	VPREB1	2943.62	-4.14372	0.974085	-4.25396	2.1e-05	0.00199565
ENSG00000267201	LINC01775	1.50698	-4.14254	1.52018	-2.72504	0.00642945	0.0768713
ENSG00000156265	MAP3K7CL	1507.17	-4.13576	0.791601	-5.22455	1.75e-07	6.4e-05
ENSG00000240864	IGKV1-16	180.722	-4.13333	0.815046	-5.07129	3.95e-07	0.000118108
ENSG00000087116	ADAMTS2	251.69	-4.13175	1.02082	-4.0475	5.18e-05	0.00362095
ENSG00000167434	CA4	228.257	-4.13141	1.15227	-3.58546	0.000336481	0.0122155
ENSG00000081479	LRP2	7.24715	-4.12952	1.40748	-2.93397	0.00334652	0.0508787
ENSG00000170289	CNGB3	1.49436	-4.12884	1.45547	-2.83677	0.00455721	0.0614825
ENSG00000211937	IGHV2-5	205.07	-4.1233	1.07011	-3.85315	0.00011661	0.00634329
ENSG00000197506	SLC28A3	8.30432	-4.12265	1.26597	-3.2565	0.00112794	0.0259449
ENSG00000104332	SFRP1	36.5845	-4.11916	1.3387	-3.07697	0.00209114	0.0386203
ENSG00000204584	FLJ45513	3.36965	-4.11097	1.24752	-3.29531	0.000983132	0.0237322
ENSG00000224295	OLFM5P	2.39396	-4.10751	1.3845	-2.96679	0.00300929	0.0480037
ENSG00000234112	AC099066.3	6.80405	4.10579	1.51824	2.70431	0.00684462	0.0801542
ENSG00000204403	CASP12	1.52696	-4.10525	1.55393	-2.64185	0.00824541	0.0892788
ENSG00000233093	LINC00892	7.36049	-4.10188	1.56289	-2.62456	0.00867613	0.0919807
ENSG00000224232	AC005104.2	2.39797	-4.10171	1.27484	-3.21743	0.00129346	0.0284136
ENSG00000278196	IGLV2-8	752.344	-4.10158	1.17112	-3.50227	0.000461314	0.0146906
ENSG00000171611	PTCRA	281.436	-4.09637	0.989457	-4.14002	3.47e-05	0.0028448
ENSG00000254119	AC025524.2	1.52003	-4.09002	1.51089	-2.70702	0.00678904	0.0795941
ENSG00000165966	PDZRN4	38.4569	-4.08471	1.34655	-3.03347	0.00241756	0.0421128
ENSG00000169085	VXN	6.17066	-4.08346	1.51999	-2.68651	0.00722032	0.0824964
ENSG00000277958	RF00017	1.02526	-4.07756	1.37915	-2.95657	0.00311084	0.0484929
ENSG00000007372	PAX6	4.01006	-4.07279	1.56249	-2.6066	0.00914457	0.0950136
ENSG00000211945	IGHV1-18	142.803	-4.07098	0.917191	-4.43853	9.06e-06	0.00112895
ENSG00000067840	PDZD4	52.9855	-4.06886	1.30694	-3.11328	0.00185019	0.0354681
ENSG00000161381	PLXDC1	62.4462	-4.06648	1.11914	-3.63359	0.000279506	0.01099
ENSG00000053108	FSTL4	15.5424	-4.06551	1.23393	-3.29476	0.000985054	0.0237485
ENSG00000041982	TNC	596.023	-4.06372	0.940202	-4.32218	1.54e-05	0.0016213
ENSG00000280225	AC237221.2	2.85468	-4.05852	1.53953	-2.63621	0.0083838	0.0900074
ENSG00000278635	AC141557.2	11.5078	-4.05703	1.03023	-3.93797	8.22e-05	0.00498617
ENSG00000105509	HAS1	3591.97	4.05644	1.27671	3.17725	0.0014868	0.0306797
ENSG00000151322	NPAS3	6.45507	-4.05524	0.910061	-4.45601	8.35e-06	0.00105751
ENSG00000227394	AC007386.1	1.41845	-4.05407	1.51543	-2.6752	0.00746851	0.0837643
ENSG00000126950	TMEM35A	1.69308	-4.05262	1.42332	-2.8473	0.00440913	0.0602503
ENSG00000081138	CDH7	57.5339	-4.04874	1.22337	-3.30951	0.000934607	0.0229728
ENSG00000128849	CGNL1	5.58057	-4.04619	1.28117	-3.1582	0.00158746	0.0320107
ENSG00000100362	PVALB	50.5677	-4.04555	1.4619	-2.76733	0.00565171	0.0707048
ENSG00000146122	DAAM2	127.29	-4.04357	1.46476	-2.76056	0.00577016	0.0715545
ENSG00000168280	KIF5C	15.4347	-4.04013	1.16362	-3.47204	0.00051652	0.0157759
ENSG00000141338	ABCA8	66.6253	-4.03513	1.45707	-2.76935	0.00561679	0.070425
ENSG00000230184	SMYD3-IT1	1.95483	-4.03263	1.48167	-2.72168	0.00649512	0.0773859
ENSG00000260132	AL032819.1	4.61015	-4.02689	1.38788	-2.90146	0.00371426	0.0541995
ENSG00000107317	PTGDS	10.1453	-4.02522	1.36857	-2.94118	0.00326964	0.0500836
ENSG00000232310	AL078590.3	3.16879	-4.01989	1.51381	-2.65547	0.00791973	0.0870181
ENSG00000213698	AC240504.1	3.14171	4.00983	1.09688	3.65568	0.000256496	0.0103905
ENSG00000188585	CLEC20A	43.9818	-4.00894	1.17803	-3.40309	0.000666287	0.0184802
ENSG00000282924	AC136428.4	4.42268	-4.00832	1.24307	-3.22454	0.00126176	0.028088
ENSG00000239704	CDRT4	1.62146	-4.00768	1.00361	-3.99325	6.52e-05	0.00425109
ENSG00000215841	AP002761.1	3.36309	-4.00327	1.50713	-2.65622	0.00790224	0.0869189
ENSG00000223855	AC147651.1	94.1535	-4.00265	1.20896	-3.31082	0.000930234	0.0229113
ENSG00000185046	ANKS1B	6.82827	-4.00191	1.33401	-2.99991	0.00270062	0.0451983
ENSG00000224397	SMIM25	423.225	-4.00011	0.94886	-4.2157	2.49e-05	0.00226807
ENSG00000253957	IGHV3-22	3.00979	-3.99422	1.13842	-3.50856	0.000450535	0.0144939
ENSG00000161640	SIGLEC11	95.4388	-3.99232	1.37174	-2.91042	0.00360948	0.0532974
ENSG00000008438	PGLYRP1	1673.2	-3.98928	0.95646	-4.17089	3.03e-05	0.00259482
ENSG00000229456	RLIMP1	47.82	-3.98774	0.732282	-5.44564	5.16e-08	2.56e-05
ENSG00000267026	AL136084.2	1.97942	-3.98498	1.24295	-3.20607	0.00134562	0.0291245
ENSG00000271046	AL512631.1	9.61036	-3.98264	1.18915	-3.34914	0.000810623	0.0210073
ENSG00000012223	LTF	23966.2	-3.98227	0.841759	-4.73089	2.24e-06	0.000434263
ENSG00000087258	GNAO1	15.6498	-3.9799	1.27045	-3.13267	0.00173223	0.0340116
ENSG00000211649	IGLV7-46	58.6966	-3.97889	1.03165	-3.85683	0.000114869	0.00630003
ENSG00000186439	TRDN	9.62998	-3.97617	1.10946	-3.58388	0.000338523	0.0122469
ENSG00000113805	CNTN3	3.15289	-3.97544	1.46561	-2.71248	0.00667815	0.078772
ENSG00000182667	NTM	0.95121	-3.97292	1.48426	-2.67669	0.00743525	NA
ENSG00000116183	PAPPA2	1.37247	-3.97008	1.52018	-2.61159	0.00901211	0.0941981
ENSG00000258986	TMEM179	6.24148	-3.96926	1.40344	-2.82823	0.00468059	0.0627346
ENSG00000278757	RF00026	1.65249	-3.96919	1.51933	-2.61247	0.00898918	0.0940366
ENSG00000203867	RBM20	3.83212	-3.96827	1.40799	-2.81839	0.00482656	0.0639946
ENSG00000211962	IGHV1-46	171.276	-3.96728	1.04859	-3.78344	0.000154678	0.0076193
ENSG00000204933	CD177P1	14.0973	-3.96616	1.45774	-2.72077	0.00651309	0.07751
ENSG00000114646	CSPG5	4.77792	-3.9648	1.32379	-2.99505	0.00274401	0.0454948
ENSG00000143595	AQP10	103.051	-3.9642	1.05697	-3.75054	0.000176452	0.00833194
ENSG00000231429	AC244021.2	0.944589	-3.96081	1.46066	-2.71165	0.00669483	NA
ENSG00000284543	LINC01226	131.012	-3.95711	1.3214	-2.99464	0.00274764	0.0455039
ENSG00000054654	SYNE2	971.545	-3.94996	0.702348	-5.62393	1.87e-08	1.04e-05
ENSG00000260498	AC126696.3	3.98926	3.94859	1.2694	3.11058	0.00186718	0.0356828
ENSG00000122735	DNAI1	5.35682	-3.94726	1.32638	-2.97596	0.00292069	0.047114
ENSG00000261253	AC137932.2	95.5885	-3.93903	1.05744	-3.72507	0.000195258	0.00887946
ENSG00000232021	LEF1-AS1	114.022	-3.93437	1.18884	-3.30943	0.000934872	0.0229728
ENSG00000257900	AL162632.1	1.57669	-3.93024	1.33334	-2.94767	0.00320174	0.0493106
ENSG00000233705	SLC26A4-AS1	1.8302	-3.92118	1.48446	-2.64148	0.00825446	0.0892929
ENSG00000236525	AC007278.2	2.21098	-3.92002	1.30767	-2.99771	0.00272016	0.0453415
ENSG00000273295	AP000350.6	9.06966	-3.9178	1.46036	-2.68277	0.00730162	0.0829414
ENSG00000274986	MIR6750	3.30144	-3.91542	1.0695	-3.66096	0.00025127	0.0102919
ENSG00000156575	PRG3	916.634	-3.91475	0.830699	-4.7126	2.45e-06	0.000459133
ENSG00000223896	CCNJP2	7.15493	-3.91284	1.17965	-3.31696	0.000910032	0.0226493
ENSG00000232739	AL607028.1	4.34249	-3.90888	1.49876	-2.60807	0.00910548	0.0947464
ENSG00000258748	AL359399.1	4.63242	-3.90704	1.31045	-2.98145	0.00286891	0.0467207
ENSG00000272085	AC091979.2	3.33651	-3.90464	1.33397	-2.92708	0.0034216	0.0515618
ENSG00000256870	SLC5A8	2.56396	-3.90087	1.4423	-2.70462	0.00683829	0.0801105
ENSG00000239736	CEACAMP3	11.0769	-3.89266	1.141	-3.41163	0.000645749	0.0182724
ENSG00000270926	AC008013.3	2.51292	-3.89125	1.49597	-2.60115	0.00929111	0.0957314
ENSG00000257086	AP001453.4	18.1673	-3.88697	0.983949	-3.95038	7.8e-05	0.00481412
ENSG00000169507	SLC38A11	2.89746	-3.88243	1.02162	-3.80027	0.000144538	0.00733096
ENSG00000153976	HS3ST3A1	15.267	-3.87172	0.856837	-4.51862	6.22e-06	0.000859328
ENSG00000256651	AC006518.1	1.72065	-3.87125	1.33915	-2.89083	0.00384229	0.0555103
ENSG00000122733	PHF24	6.54321	-3.87086	1.44069	-2.68681	0.00721377	0.0824964
ENSG00000211652	IGLV7-43	69.6044	-3.86098	1.01985	-3.78581	0.000153207	0.00759103
ENSG00000145777	TSLP	66.4559	3.85782	0.995741	3.87432	0.000106922	0.00604
ENSG00000258628	AC126603.1	0.879681	-3.85633	1.41464	-2.72601	0.00641046	NA
ENSG00000168903	BTNL3	8.30066	-3.84895	1.40823	-2.73319	0.00627242	0.0756697
ENSG00000258461	AC012651.1	11.8463	-3.84787	1.00987	-3.81026	0.000138821	0.00712314
ENSG00000148942	SLC5A12	2.45237	-3.84753	1.41444	-2.72018	0.00652455	0.0776012
ENSG00000154252	GAL3ST2	217.505	3.84516	1.03836	3.7031	0.000212984	0.00919657
ENSG00000280122	AC016168.3	17.9213	-3.83646	1.23421	-3.10843	0.00188083	0.0358324
ENSG00000279098	AC097460.3	2.25454	-3.83281	1.32271	-2.8977	0.00375905	0.0546153
ENSG00000167371	PRRT2	21.6216	-3.82854	1.35208	-2.8316	0.00463151	0.0622393
ENSG00000211964	IGHV3-48	277.364	-3.82794	0.92958	-4.11793	3.82e-05	0.003001
ENSG00000238735	RNU7-113P	1.26116	-3.82426	1.1047	-3.46182	0.000536544	0.0161357
ENSG00000124490	CRISP2	2.41868	-3.81415	1.44698	-2.63593	0.00839058	0.0900386
ENSG00000168993	CPLX1	26.9414	-3.81305	0.917448	-4.15615	3.24e-05	0.00270777
ENSG00000197444	OGDHL	103.801	3.80419	1.43332	2.6541	0.00795193	0.0872275
ENSG00000230408	AC007163.1	7.02305	-3.79922	0.78276	-4.85362	1.21e-06	0.000268509
ENSG00000148053	NTRK2	147.909	-3.79575	1.30724	-2.90364	0.00368848	0.0539978
ENSG00000211956	IGHV4-34	93.0027	-3.78459	0.856394	-4.41921	9.91e-06	0.0011867
ENSG00000211662	IGLV3-21	935.934	-3.78243	0.85753	-4.41084	1.03e-05	0.0012193
ENSG00000163464	CXCR1	423.811	-3.77935	1.16447	-3.24555	0.00117224	0.0267133
ENSG00000279796	AL133384.2	17.3867	-3.77368	1.35279	-2.78955	0.00527814	0.0675949
ENSG00000198785	GRIN3A	18.5374	-3.77103	1.38343	-2.72585	0.00641368	0.0767959
ENSG00000259483	AL355073.1	9.09394	-3.76718	1.27188	-2.9619	0.00305749	0.0481488
ENSG00000138795	LEF1	1908.73	-3.76618	1.14985	-3.27538	0.00105521	0.0248292
ENSG00000183287	CCBE1	13.5951	-3.76356	1.07766	-3.49235	0.000478792	0.0150568
ENSG00000187546	AGMO	8.09948	-3.76137	1.13207	-3.32255	0.000891981	0.0223082
ENSG00000279742	AP000974.1	3.16528	-3.75364	1.31539	-2.85364	0.00432213	0.0596656
ENSG00000236756	DNAJC9-AS1	1.67375	-3.75188	0.998624	-3.75704	0.000171932	0.00826267
ENSG00000231258	ZSWIM5P2	1.66321	-3.75161	1.40359	-2.67286	0.00752068	0.0841961
ENSG00000240771	ARHGEF25	2.83535	-3.75147	1.04356	-3.59487	0.000324551	0.0119808
ENSG00000116299	KIAA1324	102.499	-3.74899	1.308	-2.8662	0.00415435	0.0583752
ENSG00000241490	AC093010.2	3.43934	-3.74734	1.38193	-2.71167	0.00669443	0.0788452
ENSG00000211946	IGHV3-20	63.1688	-3.747	1.12552	-3.32913	0.000871174	0.0220056
ENSG00000248551	AC095050.1	2.79163	-3.74444	1.30746	-2.8639	0.00418462	0.0586667
ENSG00000284651	AP000553.6	2.13606	-3.73872	0.987731	-3.78516	0.000153613	0.00759103
ENSG00000134775	FHOD3	2.31044	-3.73132	0.979953	-3.80765	0.000140295	0.00717484
ENSG00000177455	CD19	812.647	-3.72664	0.833299	-4.47215	7.74e-06	0.000993351
ENSG00000224189	HAGLR	6.58992	-3.72592	1.32111	-2.82029	0.00479796	0.0637526
ENSG00000233750	CICP27	1.38353	-3.72555	1.33639	-2.78778	0.0053071	0.0678529
ENSG00000233013	FAM157B	9.97447	-3.72438	0.917479	-4.05936	4.92e-05	0.00350675
ENSG00000156475	PPP2R2B	40.5371	-3.72084	1.30951	-2.8414	0.00449153	0.0609166
ENSG00000204296	C6orf10	2.22281	-3.71706	1.42806	-2.60288	0.00924451	0.0954429
ENSG00000181656	GPR88	99.5096	-3.70929	1.16443	-3.18549	0.00144508	0.0302369
ENSG00000279204	AC134043.2	54.0065	-3.70659	1.22952	-3.01466	0.00257269	0.0438811
ENSG00000279278	AC245060.6	68.9978	-3.70551	0.912549	-4.06061	4.89e-05	0.00349621
ENSG00000211663	IGLV3-19	306.563	-3.70007	1.06233	-3.48297	0.000495875	0.0153783
ENSG00000086967	MYBPC2	9.32366	-3.6939	1.233	-2.99587	0.0027366	0.0454922
ENSG00000105369	CD79A	3940.04	-3.68867	0.752061	-4.90475	9.35e-07	0.000220647
ENSG00000236463	LINC00427	2.12898	-3.67956	1.4032	-2.62226	0.00873488	0.0923142
ENSG00000121742	GJB6	578.179	-3.67487	1.35747	-2.70715	0.0067864	0.0795941
ENSG00000246016	LINC01513	1.33269	-3.67232	1.33223	-2.75652	0.00584208	0.0720002
ENSG00000148357	HMCN2	3.90373	-3.67096	1.37668	-2.66654	0.00766366	0.0852135
ENSG00000224967	AC009303.1	1.56044	-3.66833	1.40921	-2.60311	0.00923817	0.0954301
ENSG00000176641	RNF152	94.9788	-3.66332	1.32903	-2.75639	0.0058443	0.0720002
ENSG00000262580	AC087741.1	15.836	-3.66043	1.16337	-3.1464	0.00165293	0.0328698
ENSG00000211640	IGLV6-57	349.724	-3.65394	1.16124	-3.14657	0.00165196	0.0328698
ENSG00000227542	AC092614.1	1.08518	-3.65325	1.31663	-2.77471	0.00552517	0.0695435
ENSG00000269190	FBXO17	8.81108	-3.65192	1.07494	-3.39733	0.000680462	0.0187933
ENSG00000171243	SOSTDC1	176.915	3.64282	1.33098	2.73695	0.00620115	0.0750747
ENSG00000243238	IGKV2-30	480.982	-3.64214	0.805702	-4.52046	6.17e-06	0.000855722
ENSG00000204044	SLC12A5-AS1	7.88635	-3.64193	1.25044	-2.91251	0.00358532	0.0530678
ENSG00000244342	LINC00698	1.54657	-3.64138	1.26498	-2.8786	0.00399444	0.0568811
ENSG00000105419	MEIS3	16.5072	-3.6409	1.31214	-2.77478	0.00552393	0.0695435
ENSG00000151090	THRB	150.463	-3.64047	0.734843	-4.95408	7.27e-07	0.00018339
ENSG00000262185	AC005736.1	2.77884	-3.64047	1.19865	-3.03714	0.00238836	0.0418633
ENSG00000256706	AC005342.2	8.36432	3.63665	1.02449	3.54973	0.00038563	0.0132652
ENSG00000160097	FNDC5	31.5262	-3.63458	1.36796	-2.65693	0.00788555	0.0869189
ENSG00000121316	PLBD1	2989.34	-3.63394	1.00782	-3.60576	0.000311244	0.011706
ENSG00000065534	MYLK	2808.81	-3.63062	0.632242	-5.74245	9.33e-09	5.99e-06
ENSG00000234663	LINC01934	14.4114	-3.62597	1.31813	-2.75085	0.00594403	0.0728071
ENSG00000240405	SAMMSON	7.85231	-3.61737	1.00542	-3.59787	0.00032083	0.0118861
ENSG00000183873	SCN5A	13.7293	-3.61547	1.09543	-3.30049	0.000965164	0.0234712
ENSG00000196091	MYBPC1	3.31139	-3.61486	1.22177	-2.95872	0.00308918	0.0483699
ENSG00000180730	SHISA2	104.356	-3.61336	0.935804	-3.86123	0.000112816	0.00624691
ENSG00000267583	AC007998.3	18.4745	-3.60762	0.87168	-4.1387	3.49e-05	0.0028448
ENSG00000211950	IGHV1-24	99.4832	-3.60451	0.716438	-5.03115	4.88e-07	0.00013771
ENSG00000260601	AC131391.1	3.78363	-3.603	1.38142	-2.60819	0.00910236	0.0947464
ENSG00000272398	CD24	1462.98	-3.60067	0.789178	-4.56256	5.05e-06	0.000747986
ENSG00000217801	AL390719.1	877.675	3.59881	1.00641	3.57588	0.000349051	0.0124269
ENSG00000244437	IGKV3-15	916.647	-3.5964	0.796739	-4.5139	6.36e-06	0.000870865
ENSG00000167306	MYO5B	24.8313	-3.59335	1.38652	-2.59162	0.00955241	0.097345
ENSG00000265623	MIR3139	3.98269	-3.59072	1.35178	-2.65629	0.00790057	0.0869189
ENSG00000127831	VIL1	66.2577	-3.59015	1.32978	-2.6998	0.00693805	0.0809098
ENSG00000271538	LINC02427	5.06589	-3.5869	1.32133	-2.71462	0.00663528	0.0784788
ENSG00000233916	ZDHHC20P1	3.67938	-3.5855	1.21941	-2.94035	0.00327837	0.0500836
ENSG00000145808	ADAMTS19	1.04046	-3.58336	1.31735	-2.72012	0.00652579	0.0776012
ENSG00000249234	AC108063.1	13.0027	-3.57644	1.26454	-2.82826	0.00468023	0.0627346
ENSG00000251804	RNU6-1294P	1.46573	-3.57521	1.01523	-3.52156	0.000429011	0.0141413
ENSG00000272078	AL139423.1	13.9728	3.57518	1.02414	3.4909	0.000481393	0.0151132
ENSG00000231645	KRT17P6	163.112	3.57499	0.819291	4.36351	1.28e-05	0.00142881
ENSG00000170577	SIX2	32.9696	-3.57269	1.26314	-2.82841	0.00467794	0.0627346
ENSG00000211949	IGHV3-23	616.688	-3.55282	0.803254	-4.42304	9.73e-06	0.00117088
ENSG00000161544	CYGB	1252.59	-3.55117	0.862137	-4.11903	3.8e-05	0.00299575
ENSG00000275940	MRPL57P3	4.00734	-3.54951	1.12217	-3.16309	0.00156105	0.0316184
ENSG00000197558	SSPO	63.9743	-3.54482	0.603036	-5.87829	4.15e-09	3.19e-06
ENSG00000019169	MARCO	253.595	-3.5438	0.896836	-3.95145	7.77e-05	0.00480222
ENSG00000108001	EBF3	61.7784	-3.5335	1.09287	-3.23323	0.00122397	0.0276468
ENSG00000211947	IGHV3-21	199.943	-3.53132	1.00523	-3.51294	0.000443176	0.0144077
ENSG00000162733	DDR2	159.455	-3.52883	1.35153	-2.61099	0.00902798	0.0942823
ENSG00000267206	LCN6	98.8413	-3.52511	0.954872	-3.69171	0.000222748	0.00954112
ENSG00000179715	PCED1B	132.893	-3.51917	1.20314	-2.925	0.00344456	0.0516802
ENSG00000200397	RF00019	25.5454	-3.51431	0.689972	-5.09341	3.52e-07	0.000112648
ENSG00000107562	CXCL12	2566.1	-3.50406	1.0082	-3.47554	0.000509818	0.0156332
ENSG00000115085	ZAP70	1361.67	-3.50261	0.997708	-3.51065	0.000447008	0.0144559
ENSG00000110169	HPX	5.27984	-3.50187	1.32799	-2.63697	0.00836498	0.0900074
ENSG00000269553	U62631.1	9.65867	-3.47396	1.3227	-2.62641	0.00862908	0.0916397
ENSG00000222071	MIR1915	0.970776	-3.46325	1.31918	-2.62529	0.00865743	0.091853
ENSG00000235770	LINC00607	2.32059	-3.45851	1.31296	-2.63414	0.008435	0.0903263
ENSG00000142279	WTIP	15.7213	-3.45278	0.945251	-3.65277	0.00025943	0.010468
ENSG00000279805	Z95114.3	11.2594	-3.45168	1.02507	-3.36725	0.000759215	0.0202372
ENSG00000260971	AC119674.1	3.77665	-3.44941	1.08236	-3.18692	0.00143796	0.0301569
ENSG00000211637	IGLV4-69	158.604	-3.44919	1.30307	-2.64698	0.00812153	0.088415
ENSG00000261211	AL031123.2	6.6197	-3.44871	1.30372	-2.64528	0.00816231	0.0887961
ENSG00000188933	USP32P1	5.25637	-3.44379	1.27038	-2.71084	0.00671139	0.0790147
ENSG00000109762	SNX25	274.262	-3.4394	0.833032	-4.12878	3.65e-05	0.00291635
ENSG00000233876	GAPDHP68	5.8383	-3.4357	1.02968	-3.33668	0.00084787	0.0216986
ENSG00000204099	NEU4	7954.84	3.43536	0.993307	3.4585	0.000543185	0.0162526
ENSG00000154646	TMPRSS15	2.27501	-3.43368	1.29529	-2.65088	0.00802813	0.0877372
ENSG00000112182	BACH2	1069.16	-3.43009	0.814394	-4.21183	2.53e-05	0.00228697
ENSG00000229719	MIR194-2HG	3.53539	-3.42987	1.2911	-2.65655	0.00789449	0.0869189
ENSG00000163220	S100A9	44674.5	-3.42154	0.953389	-3.58882	0.00033218	0.0121315
ENSG00000222881	RF00019	1.90799	-3.41932	1.24464	-2.74724	0.00600998	0.0734535
ENSG00000225528	Z82206.1	27.228	-3.41791	0.959509	-3.56215	0.000367831	0.0128541
ENSG00000276566	IGKV1D-13	18.1499	-3.41249	1.19689	-2.85112	0.00435649	0.05985
ENSG00000179994	SPDYE7P	1.43447	-3.40994	1.27135	-2.68214	0.00731537	0.0830025
ENSG00000268105	AC124856.1	4.34741	-3.40723	0.957504	-3.55845	0.00037305	0.0130216
ENSG00000168140	VASN	838.067	-3.40545	0.733633	-4.64191	3.45e-06	0.000574487
ENSG00000267882	AL031666.2	6.16184	-3.40475	1.06247	-3.20456	0.00135269	0.0292429
ENSG00000270442	AC008725.1	3.65193	-3.39912	1.25828	-2.70139	0.00690494	0.0806764
ENSG00000154175	ABI3BP	125.269	-3.39758	0.883276	-3.84656	0.000119786	0.00642422
ENSG00000221230	MIR548L	2.26351	-3.39547	1.1963	-2.83832	0.00453514	0.0613999
ENSG00000211934	IGHV1-2	105.512	-3.39481	0.850789	-3.99019	6.6e-05	0.00427901
ENSG00000280119	AC093642.2	37.4467	-3.39318	1.29979	-2.61056	0.00903954	0.0943362
ENSG00000158077	NLRP14	2.20002	-3.3885	1.13497	-2.98555	0.0028307	0.0463531
ENSG00000151715	TMEM45B	22.003	-3.38571	1.03093	-3.28414	0.00102293	0.0243773
ENSG00000274642	AC244669.2	9.20313	3.38224	1.14001	2.96684	0.00300881	0.0480037
ENSG00000177752	YIPF7	0.769832	-3.38199	1.29997	-2.60159	0.00927937	NA
ENSG00000260765	CES1P2	4.6672	-3.37979	1.28901	-2.62201	0.00874131	0.092322
ENSG00000235027	AC068580.3	43.8886	-3.37587	0.863523	-3.90941	9.25e-05	0.00546727
ENSG00000164418	GRIK2	5.37992	-3.37314	1.15191	-2.92829	0.00340831	0.0514843
ENSG00000231412	AC005392.2	131.605	-3.36509	1.29745	-2.59362	0.00949715	0.0970102
ENSG00000239975	IGKV1D-33	73.5544	-3.36276	0.895761	-3.75408	0.000173976	0.00831707
ENSG00000241939	RN7SL517P	1.85226	-3.36102	1.27821	-2.62946	0.00855199	0.0911045
ENSG00000222872	RNU4-78P	1.97418	-3.35779	1.11583	-3.00922	0.00261921	0.0443911
ENSG00000229106	BTBD6P1	21.0674	-3.35488	0.770431	-4.35455	1.33e-05	0.00146028
ENSG00000267702	AP005131.6	25.4024	-3.35396	1.16118	-2.88839	0.00387214	0.0557064
ENSG00000124469	CEACAM8	1032.55	-3.352	0.838662	-3.99684	6.42e-05	0.00421392
ENSG00000162551	ALPL	764.773	-3.34569	0.99618	-3.35852	0.000783609	0.0206726
ENSG00000273230	AC102953.2	5.00049	-3.33304	1.04697	-3.18351	0.00145503	0.0303291
ENSG00000164850	GPER1	68.0256	-3.33105	1.19681	-2.78328	0.0053812	0.0686008
ENSG00000248592	TMEM110-MUSTN1	13.3415	-3.32727	0.848594	-3.92092	8.82e-05	0.00528363
ENSG00000186047	DLEU7	16.0295	-3.32713	0.999232	-3.32969	0.000869434	0.0219945
ENSG00000109501	WFS1	1022.09	-3.32653	0.983615	-3.38194	0.000719746	0.0195404
ENSG00000244116	IGKV2-28	688.69	-3.32375	0.935366	-3.55342	0.000380255	0.0131755
ENSG00000224041	IGKV3D-15	61.3872	-3.31567	0.890886	-3.72176	0.000197838	0.00890474
ENSG00000188385	JAKMIP3	12.9909	-3.31454	1.27618	-2.59723	0.00939786	0.0964119
ENSG00000196781	TLE1	2877.79	-3.31229	0.738447	-4.48548	7.27e-06	0.000961264
ENSG00000105609	LILRB5	1424	-3.29224	1.1075	-2.97267	0.00295218	0.0474862
ENSG00000066735	KIF26A	68.2955	-3.29187	0.920394	-3.57659	0.000348107	0.0124269
ENSG00000137078	SIT1	44.1456	-3.28893	1.25408	-2.62259	0.00872641	0.0922596
ENSG00000162366	PDZK1IP1	320.972	-3.28687	0.741294	-4.43397	9.25e-06	0.00114389
ENSG00000232233	LINC02043	1.72675	-3.28326	1.10012	-2.98446	0.00284084	0.0464366
ENSG00000217527	RPS16P5	3.57406	-3.28287	1.17303	-2.79862	0.0051322	0.0663328
ENSG00000201183	RNVU1-3	10.3397	3.28208	1.07312	3.05845	0.00222485	0.0401975
ENSG00000253818	IGLV1-41	37.2792	-3.27815	1.10889	-2.95625	0.00311408	0.0485189
ENSG00000211752	TRBV27	279.612	3.27657	0.943604	3.4724	0.000515827	0.0157704
ENSG00000206561	COLQ	90.7065	-3.27279	0.980315	-3.33851	0.000842302	0.021592
ENSG00000160886	LY6K	65.1591	3.27074	0.97527	3.35368	0.000797457	0.0208211
ENSG00000225698	IGHV3-72	115.071	-3.26845	1.05864	-3.08741	0.00201911	0.0376285
ENSG00000154146	NRGN	3160.23	-3.26806	0.631497	-5.1751	2.28e-07	8.05e-05
ENSG00000231344	AL020997.1	2.83152	-3.26799	0.878494	-3.71999	0.00019923	0.00894123
ENSG00000099840	IZUMO4	20.826	-3.26568	0.692363	-4.71672	2.4e-06	0.000455481
ENSG00000242076	IGKV1-33	237.097	-3.26063	0.86927	-3.751	0.000176127	0.00833194
ENSG00000163638	ADAMTS9	48.6037	-3.25938	1.10749	-2.94303	0.00325013	0.0499311
ENSG00000197249	SERPINA1	6049.66	-3.25906	0.998489	-3.26399	0.00109854	0.0254674
ENSG00000259605	AC074212.1	5.00194	-3.25488	1.06002	-3.07058	0.00213642	0.0390119
ENSG00000176956	LY6H	89.2044	-3.24575	1.22081	-2.65867	0.00784489	0.0865355
ENSG00000115468	EFHD1	32.6369	-3.2441	1.22699	-2.64395	0.0081945	0.0889191
ENSG00000143546	S100A8	22261.8	-3.24358	0.923031	-3.51405	0.000441324	0.0143626
ENSG00000104918	RETN	449.314	-3.22096	1.0257	-3.14025	0.00168804	0.0333566
ENSG00000159958	TNFRSF13C	151.938	-3.21843	0.781654	-4.11745	3.83e-05	0.003001
ENSG00000248810	LINC02432	10.5644	-3.21822	1.16439	-2.76386	0.00571223	0.0710608
ENSG00000227165	WDR11-AS1	59.9537	-3.20116	0.774725	-4.132	3.6e-05	0.00288329
ENSG00000283526	PRRT1B	3.31253	-3.19995	1.17598	-2.72109	0.00650675	0.0774759
ENSG00000251485	AC068134.3	3.72825	-3.19476	0.904219	-3.53318	0.0004106	0.013781
ENSG00000280411	IGHV1-69D	92.7676	-3.19395	1.11866	-2.85514	0.00430176	0.0595506
ENSG00000254419	AL139349.1	2.76665	-3.19217	1.06267	-3.0039	0.00266541	0.0447925
ENSG00000249626	AC024560.2	36.7608	-3.1918	0.738686	-4.32091	1.55e-05	0.0016213
ENSG00000102445	RUBCNL	574.266	-3.18899	0.824217	-3.86911	0.000109231	0.00612551
ENSG00000199700	RNU6-223P	1.94029	-3.18444	1.16064	-2.74369	0.00607538	0.0740469
ENSG00000166033	HTRA1	78.16	-3.18137	0.969883	-3.28016	0.00103748	0.0245509
ENSG00000211959	IGHV4-39	181.919	-3.18094	0.810258	-3.92583	8.64e-05	0.00519714
ENSG00000204580	DDR1	348.271	-3.17425	0.926197	-3.42718	0.000609877	0.0177135
ENSG00000253120	IGLV2-34	4.52818	-3.17278	1.14546	-2.76989	0.00560755	0.0703503
ENSG00000227201	CNN2P1	3.4379	-3.17016	1.12477	-2.8185	0.00482485	0.0639946
ENSG00000242534	IGKV2D-28	301.662	-3.16647	0.907853	-3.48786	0.000486901	0.015189
ENSG00000244232	RN7SL698P	3.98282	-3.16335	1.09073	-2.90023	0.00372888	0.0543309
ENSG00000269534	AC011466.3	8.65407	-3.16231	1.11212	-2.84351	0.00446202	0.0607824
ENSG00000232295	AL589935.1	7.13415	-3.16102	1.1982	-2.63814	0.00833631	0.0897819
ENSG00000227028	SLC8A1-AS1	107.112	-3.15717	0.882745	-3.57653	0.00034818	0.0124269
ENSG00000122543	OCM	2.8165	-3.15221	0.981613	-3.21125	0.00132159	0.0287703
ENSG00000035664	DAPK2	216.455	-3.15003	0.857073	-3.67534	0.000237537	0.00999049
ENSG00000260621	AC092140.1	3.96048	-3.14961	1.01003	-3.11833	0.0018188	0.0350848
ENSG00000211688	TRGJP2	76.4328	3.1414	0.81554	3.85192	0.000117193	0.00635216
ENSG00000116106	EPHA4	67.297	-3.1406	1.14448	-2.74413	0.00606709	0.0739753
ENSG00000268734	AC245128.3	675.368	-3.1399	0.841655	-3.73062	0.000191006	0.00880313
ENSG00000185275	CD24P4	10.8189	-3.13831	0.996457	-3.14947	0.00163569	0.0327001
ENSG00000243033	GAPDHP47	1.7976	-3.1368	1.06451	-2.9467	0.00321189	0.0494422
ENSG00000141748	ARL5C	25.5322	-3.13142	0.756882	-4.13726	3.51e-05	0.00285511
ENSG00000019549	SNAI2	276.17	-3.1254	1.0796	-2.89496	0.00379203	0.0550426
ENSG00000229855	AC008568.1	156.127	3.12501	1.11624	2.79959	0.00511675	0.066274
ENSG00000241755	IGKV1-9	371.216	-3.12014	0.861164	-3.62316	0.000291021	0.0113054
ENSG00000279315	AL158212.4	6.98008	-3.11941	1.06966	-2.91627	0.00354244	0.0526228
ENSG00000224650	IGHV3-74	548.301	-3.11834	0.983261	-3.17143	0.00151693	0.0310722
ENSG00000186431	FCAR	1612.58	-3.1162	0.855675	-3.64181	0.000270731	0.0107687
ENSG00000049540	ELN	2465.56	3.11016	0.751431	4.13899	3.49e-05	0.0028448
ENSG00000171790	SLFNL1	79.3682	-3.10272	1.13722	-2.72834	0.00636532	0.0765346
ENSG00000132170	PPARG	244.395	-3.09403	0.899229	-3.44076	0.00058009	0.0169764
ENSG00000162595	DIRAS3	320.093	3.09276	1.07499	2.87702	0.00401448	0.0571135
ENSG00000102359	SRPX2	77.0534	-3.09197	1.12091	-2.75844	0.00580775	0.0717797
ENSG00000211644	IGLV1-51	1177.82	-3.091	1.02539	-3.01445	0.00257442	0.0438863
ENSG00000174885	NLRP6	192.994	-3.08486	1.00356	-3.07391	0.00211274	0.0388005
ENSG00000127325	BEST3	140.913	-3.08482	1.13732	-2.71236	0.00668053	0.078772
ENSG00000271503	CCL5	1640.27	-3.08336	0.855786	-3.60295	0.00031462	0.0117486
ENSG00000277290	AC136475.10	14.2309	-3.08064	0.760924	-4.04855	5.15e-05	0.00361418
ENSG00000111728	ST8SIA1	13.1968	-3.07938	1.1439	-2.69201	0.00710227	0.0818942
ENSG00000152578	GRIA4	2.4408	-3.07465	1.06796	-2.879	0.00398944	0.0568625
ENSG00000102837	OLFM4	369.128	-3.06358	0.878361	-3.48784	0.000486942	0.015189
ENSG00000131981	LGALS3	2192.84	-3.06154	0.728662	-4.20159	2.65e-05	0.00233476
ENSG00000228876	AC010745.2	5.48907	-3.05902	1.16528	-2.62515	0.0086611	0.091853
ENSG00000135074	ADAM19	189.902	-3.05788	0.885274	-3.45416	0.000552013	0.016436
ENSG00000249464	LINC01091	72.174	3.05779	0.952899	3.20893	0.00133228	0.0289259
ENSG00000119681	LTBP2	269.585	-3.0545	0.823663	-3.70844	0.000208542	0.00911985
ENSG00000122254	HS3ST2	529.456	-3.0533	1.11077	-2.74881	0.00598118	0.0731596
ENSG00000186765	FSCN2	3.65455	-3.05248	1.11826	-2.72968	0.00633965	0.0763312
ENSG00000123836	PFKFB2	586.386	-3.05133	0.511078	-5.97038	2.37e-09	1.97e-06
ENSG00000228278	ORM2	31.8361	-3.05091	1.17751	-2.59099	0.00957007	0.097464
ENSG00000164821	DEFA4	1598.89	-3.0485	0.933868	-3.26438	0.00109703	0.0254674
ENSG00000140945	CDH13	27.086	-3.04682	1.0677	-2.85365	0.00432207	0.0596656
ENSG00000133067	LGR6	138.324	-3.04525	0.981839	-3.10158	0.00192491	0.0363571
ENSG00000224490	TTC21B-AS1	13.3646	-3.0444	0.814761	-3.73655	0.00018656	0.00863702
ENSG00000211955	IGHV3-33	350.567	-3.04281	0.742846	-4.09615	4.2e-05	0.00320122
ENSG00000139193	CD27	69.4147	-3.03737	0.981601	-3.09431	0.00197274	0.0369209
ENSG00000270550	IGHV3-30	561.065	-3.03592	0.775477	-3.91491	9.04e-05	0.0053855
ENSG00000173166	RAPH1	159.844	-3.03475	0.840385	-3.61114	0.000304856	0.0115444
ENSG00000226472	AC008013.1	3.22985	-3.02923	1.06197	-2.85247	0.00433814	0.0597844
ENSG00000243847	RN7SL610P	2.8105	-3.02456	0.975787	-3.09962	0.00193772	0.036532
ENSG00000239951	IGKV3-20	2323.17	-3.02122	0.74255	-4.0687	4.73e-05	0.00343706
ENSG00000124191	TOX2	80.2769	-3.02066	0.916621	-3.29543	0.000982706	0.0237322
ENSG00000228158	TLE1P1	34.9499	-3.01912	1.01849	-2.96431	0.00303363	0.0481336
ENSG00000236411	NDUFAF4P3	2.24432	-3.01729	1.0287	-2.93312	0.00335573	0.0509182
ENSG00000280381	AC026362.2	46.3872	-3.01488	0.980921	-3.07351	0.00211553	0.0388005
ENSG00000211666	IGLV2-14	854.034	-3.0141	0.885031	-3.40564	0.000660081	0.018449
ENSG00000144407	PTH2R	439.667	3.01178	0.852478	3.53297	0.000410919	0.013781
ENSG00000155659	VSIG4	2628.01	-3.00936	1.01254	-2.97208	0.00295785	0.0475141
ENSG00000137491	SLCO2B1	2466.91	-3.00855	1.09847	-2.73885	0.0061654	0.0748029
ENSG00000167483	FAM129C	619.188	-3.00407	1.14084	-2.63322	0.00845789	0.0905085
ENSG00000170956	CEACAM3	157.857	-2.99891	1.01397	-2.9576	0.00310041	0.0483699
ENSG00000247774	PCED1B-AS1	339.206	-2.9976	0.835059	-3.58969	0.000331071	0.0121315
ENSG00000173080	RXFP4	32.0536	-2.9966	1.08816	-2.75383	0.00589029	0.0723886
ENSG00000174567	GOLT1A	10.9188	-2.99636	1.1558	-2.59246	0.00952917	0.0971537
ENSG00000091513	TF	834.482	-2.99551	1.06515	-2.81228	0.00491909	0.0647789
ENSG00000168824	NSG1	17.4208	-2.99494	1.02098	-2.9334	0.00335276	0.0509138
ENSG00000064300	NGFR	232.206	-2.99409	1.01161	-2.95974	0.00307899	0.0483296
ENSG00000176749	CDK5R1	159.389	-2.99198	0.999915	-2.99223	0.00276943	0.045658
ENSG00000108950	FAM20A	286.142	-2.9889	0.781581	-3.82417	0.000131212	0.00680074
ENSG00000257017	HP	682.694	-2.98812	0.898601	-3.32531	0.000883218	0.0221791
ENSG00000281344	HELLPAR	84.2639	-2.98415	0.513563	-5.81067	6.22e-09	4.35e-06
ENSG00000237899	AL031289.1	2.41699	-2.98363	1.01802	-2.93082	0.00338064	0.0511449
ENSG00000265879	MIR4748	3.64105	-2.98262	0.778044	-3.83348	0.000126344	0.00664736
ENSG00000188906	LRRK2	237.808	-2.98107	1.06721	-2.79333	0.00521684	0.0670889
ENSG00000168546	GFRA2	765.879	-2.97691	1.1133	-2.67394	0.00749656	0.0840177
ENSG00000214140	PRCD	166.006	-2.97575	0.77567	-3.83636	0.00012487	0.00660543
ENSG00000180447	GAS1	86.7131	-2.97071	0.933645	-3.18184	0.00146341	0.0304418
ENSG00000144749	LRIG1	1459.71	-2.96733	0.677772	-4.37806	1.2e-05	0.00136532
ENSG00000266397	AP000919.3	2.97954	-2.96273	1.10217	-2.68808	0.00718645	0.0824791
ENSG00000244476	ERVFRD-1	182.141	2.96192	1.01398	2.92107	0.00348827	0.0521581
ENSG00000069122	ADGRF5	204.41	-2.95854	1.05736	-2.79804	0.0051413	0.0663851
ENSG00000204277	LINC01993	74.1896	2.94936	1.07681	2.73897	0.00616317	0.0748029
ENSG00000175868	CALCB	20.6667	2.94529	1.09735	2.68399	0.00727498	0.0828922
ENSG00000177575	CD163	4202.76	-2.94376	1.06332	-2.76846	0.00563217	0.0705428
ENSG00000154537	FAM27C	13.2856	2.93903	1.04318	2.81736	0.00484196	0.0641711
ENSG00000211632	IGKV3D-11	82.9994	-2.92905	0.708831	-4.13223	3.59e-05	0.00288329
ENSG00000211660	IGLV2-23	852.714	-2.92887	1.09756	-2.66852	0.00761857	0.0850137
ENSG00000164692	COL1A2	766.474	-2.92884	1.00848	-2.90421	0.00368183	0.0539774
ENSG00000124772	CPNE5	266.128	-2.92729	0.885099	-3.3073	0.00094199	0.0230533
ENSG00000134532	SOX5	5.91953	-2.92642	1.06385	-2.75078	0.00594527	0.0728071
ENSG00000162692	VCAM1	5301.51	-2.92304	1.03895	-2.81345	0.00490128	0.0647066
ENSG00000128266	GNAZ	181.401	-2.92181	0.79123	-3.69274	0.000221847	0.00952581
ENSG00000131885	KRT17P1	71.4193	2.91612	1.02184	2.8538	0.00432004	0.0596656
ENSG00000007968	E2F2	2398.59	-2.91322	0.597769	-4.8735	1.1e-06	0.000246378
ENSG00000233974	AC138951.1	71.8488	-2.91209	0.632967	-4.60069	4.21e-06	0.000670954
ENSG00000146674	IGFBP3	206.377	-2.91117	1.08119	-2.69255	0.00709069	0.0818924
ENSG00000256263	DDX11L8	65.5514	-2.91113	1.00044	-2.90986	0.00361587	0.0533405
ENSG00000213211	KRT18P64	1.43685	2.9064	1.09559	2.65282	0.0079822	0.0875
ENSG00000225825	IGHD6-25	36.9053	-2.90135	0.796178	-3.6441	0.00026833	0.0106964
ENSG00000186407	CD300E	1253.2	-2.89851	1.07603	-2.6937	0.00706628	0.0818924
ENSG00000211893	IGHG2	25088.8	-2.8949	0.852563	-3.39552	0.000684979	0.0188558
ENSG00000161929	SCIMP	178.666	-2.89271	0.869094	-3.32843	0.000873382	0.0220056
ENSG00000267369	AC015911.7	3.53763	-2.89043	1.03286	-2.79848	0.00513434	0.0663328
ENSG00000257624	AC004024.1	2.18678	-2.8902	0.940389	-3.07341	0.00211629	0.0388005
ENSG00000151632	AKR1C2	118.092	-2.88733	0.772075	-3.7397	0.000184237	0.00856813
ENSG00000131969	ABHD12B	450.196	2.88693	0.902495	3.19883	0.00137987	0.0295631
ENSG00000238121	LINC00426	734.37	-2.87738	0.727058	-3.95756	7.57e-05	0.00470936
ENSG00000234506	LINC01506	27.0729	-2.87373	1.0878	-2.64178	0.00824727	0.0892788
ENSG00000213943	KRT18P17	23.4486	2.86906	0.738628	3.88431	0.000102622	0.00588422
ENSG00000242853	RN7SL749P	17.7239	-2.86846	1.00544	-2.85294	0.0043317	0.0597492
ENSG00000253497	IGKV1-13	18.0632	-2.85973	0.913071	-3.13198	0.00173629	0.0340479
ENSG00000165072	MAMDC2	756.061	2.85844	0.69113	4.1359	3.54e-05	0.00286457
ENSG00000269981	AL627309.7	27.0135	-2.85732	1.09761	-2.60323	0.00923506	0.0954301
ENSG00000007312	CD79B	5761.28	-2.85433	0.624365	-4.57157	4.84e-06	0.000730557
ENSG00000179253	AL162457.1	37.3706	2.85201	0.971861	2.93459	0.00333993	0.0508035
ENSG00000196586	MYO6	78.0084	-2.8482	0.850897	-3.34729	0.000816044	0.0210768
ENSG00000167676	PLIN4	89.8282	-2.84474	0.933394	-3.04774	0.00230568	0.0411892
ENSG00000149926	FAM57B	17.4046	-2.84423	0.780482	-3.64419	0.000268235	0.0106964
ENSG00000228791	THRB-AS1	13.1598	-2.84211	0.998002	-2.8478	0.00440222	0.0602361
ENSG00000105697	HAMP	171.972	2.84147	0.937223	3.03179	0.00243104	0.0421897
ENSG00000169744	LDB2	76.3154	-2.84102	0.831581	-3.4164	0.000634544	0.0180785
ENSG00000102935	ZNF423	165.555	-2.83932	0.978891	-2.90055	0.00372507	0.054301
ENSG00000198734	F5	221.513	-2.83926	1.0828	-2.62215	0.00873757	0.0923142
ENSG00000115602	IL1RL1	418.962	2.83763	0.943006	3.00914	0.00261989	0.0443911
ENSG00000163823	CCR1	773.989	-2.8372	0.805971	-3.52023	0.000431175	0.0141822
ENSG00000229268	PES1P2	3.9231	-2.83686	1.03715	-2.73526	0.00623314	0.075373
ENSG00000270028	AC079315.1	8.02397	-2.83625	1.00421	-2.82435	0.00473765	0.0632515
ENSG00000259384	GH1	46.4301	-2.83555	1.06838	-2.65406	0.00795295	0.0872275
ENSG00000234109	RPL7P36	7.31089	2.83439	0.697151	4.06567	4.79e-05	0.00345067
ENSG00000243290	IGKV1-12	210.972	-2.82923	1.04785	-2.70003	0.00693332	0.0808852
ENSG00000107447	DNTT	18692.4	-2.8239	1.02992	-2.74186	0.00610926	0.0743716
ENSG00000282600	IGHV3-69-1	19.9915	-2.82212	0.872932	-3.23292	0.00122533	0.027657
ENSG00000134245	WNT2B	15.7656	-2.81948	0.779043	-3.61916	0.00029556	0.0113511
ENSG00000237166	LINC01792	21.4853	-2.81845	0.918039	-3.07008	0.00214004	0.0390316
ENSG00000092529	CAPN3	23.0074	-2.81297	0.891906	-3.15389	0.00161111	0.0323478
ENSG00000174944	P2RY14	319.025	-2.81138	0.784433	-3.58396	0.000338418	0.0122469
ENSG00000154864	PIEZO2	961.317	2.81131	1.0282	2.73422	0.00625292	0.0755198
ENSG00000227191	TRGC2	891.514	2.79649	0.740027	3.77891	0.000157516	0.00773435
ENSG00000260078	AC007342.3	94.2321	-2.79544	1.05924	-2.6391	0.00831273	0.089718
ENSG00000161911	TREML1	865.705	-2.79283	0.931405	-2.99851	0.00271307	0.0452967
ENSG00000249715	FER1L5	5.24154	-2.78418	1.06839	-2.60596	0.00916173	0.0950879
ENSG00000171051	FPR1	3576.27	-2.78403	0.869656	-3.2013	0.0013681	0.0294331
ENSG00000183918	SH2D1A	716.492	2.78383	1.07101	2.59926	0.00934248	0.0960678
ENSG00000172403	SYNPO2	48.2361	-2.78031	0.815009	-3.41139	0.000646334	0.0182724
ENSG00000085514	PILRA	1316.33	-2.78008	0.722341	-3.8487	0.000118745	0.0064137
ENSG00000211952	IGHV4-28	19.2084	-2.76938	1.03067	-2.68696	0.00721048	0.0824964
ENSG00000179593	ALOX15B	134.818	-2.76892	0.887922	-3.11842	0.00181823	0.0350848
ENSG00000184060	ADAP2	378.538	-2.76417	0.926243	-2.98428	0.00284244	0.0464366
ENSG00000221716	SNORA11	11.0541	-2.76242	1.06882	-2.58456	0.00975046	0.098519
ENSG00000211677	IGLC2	10553.4	-2.75864	0.837155	-3.29525	0.000983324	0.0237322
ENSG00000103196	CRISPLD2	493.985	-2.75499	0.78377	-3.51506	0.000439663	0.0143237
ENSG00000211895	IGHA1	41953.9	-2.75164	0.668971	-4.11325	3.9e-05	0.00304072
ENSG00000118113	MMP8	3347.69	-2.751	0.923429	-2.97911	0.00289088	0.0468455
ENSG00000269901	AC010531.5	6.33265	-2.74726	0.94469	-2.9081	0.00363629	0.0534625
ENSG00000187498	COL4A1	172.228	-2.74565	0.905333	-3.03275	0.00242338	0.0421756
ENSG00000197415	VEPH1	47.729	-2.74428	0.980444	-2.79902	0.00512587	0.0663328
ENSG00000262655	SPON1	945.102	2.74208	1.0555	2.59788	0.00938006	0.0963157
ENSG00000166405	RIC3	67.6405	-2.74084	0.913447	-3.00055	0.00269495	0.0451657
ENSG00000215807	KRT18P65	9.88417	2.74014	1.0374	2.64136	0.00825728	0.0892929
ENSG00000165457	FOLR2	2476.56	-2.73922	1.03868	-2.63721	0.00835922	0.0899844
ENSG00000133048	CHI3L1	1096.92	-2.73464	0.730586	-3.74307	0.000181782	0.00849139
ENSG00000233614	DDX11L10	306.853	-2.73082	0.94178	-2.89964	0.00373594	0.054359
ENSG00000171219	CDC42BPG	144.278	-2.72379	0.759738	-3.58517	0.000336861	0.0122155
ENSG00000254166	CASC19	7.91735	-2.72188	1.01647	-2.67777	0.0074114	0.0834421
ENSG00000179840	PIK3CD-AS1	409.089	-2.7208	0.653604	-4.16276	3.14e-05	0.0026594
ENSG00000185666	SYN3	8.18874	-2.71387	1.00509	-2.70012	0.00693136	0.0808852
ENSG00000066382	MPPED2	398.254	-2.71151	0.695323	-3.89964	9.63e-05	0.00562798
ENSG00000137962	ARHGAP29	99.9963	-2.70944	0.705282	-3.84164	0.000122216	0.00652108
ENSG00000248884	AC010280.2	5.94575	2.70474	1.04543	2.5872	0.00967596	0.0982499
ENSG00000167601	AXL	669.003	-2.70149	0.834449	-3.23745	0.00120603	0.0273216
ENSG00000019102	VSIG2	79.7206	-2.70003	0.75577	-3.57256	0.000353511	0.0125195
ENSG00000101335	MYL9	484.142	-2.69941	0.62734	-4.30294	1.69e-05	0.00170695
ENSG00000227502	LINC01268	490.755	2.69291	0.927643	2.90296	0.00369651	0.0540593
ENSG00000216490	IFI30	217.998	-2.68634	0.876078	-3.06633	0.00216706	0.0393612
ENSG00000188389	PDCD1	392.669	2.68354	1.03365	2.59618	0.00942666	0.0964822
ENSG00000141979	AC008764.1	5.36178	-2.68032	1.03901	-2.5797	0.0098887	0.0995238
ENSG00000130203	APOE	26534.9	-2.67434	1.01478	-2.63538	0.00840441	0.0901414
ENSG00000170421	KRT8	1321.43	2.67242	0.660546	4.04578	5.22e-05	0.00362095
ENSG00000182732	RGS6	123.592	-2.67011	0.872247	-3.06119	0.00220463	0.0399258
ENSG00000134871	COL4A2	405.218	-2.66947	0.802384	-3.32693	0.000878097	0.0220866
ENSG00000214595	EML6	47.3703	-2.66739	0.879761	-3.03195	0.00242978	0.0421897
ENSG00000263531	AC130324.1	11.0493	-2.66736	0.783729	-3.40342	0.000665474	0.0184743
ENSG00000251600	AC139713.2	98.3665	-2.66551	0.715294	-3.72645	0.000194195	0.0088458
ENSG00000138669	PRKG2	603.285	-2.66367	0.822429	-3.23878	0.00120041	0.0272142
ENSG00000138119	MYOF	109.465	-2.66131	0.912379	-2.9169	0.00353534	0.0525809
ENSG00000131042	LILRB2	2314.49	-2.66089	0.739213	-3.59962	0.00031868	0.0118378
ENSG00000162894	FCMR	1114.25	-2.65552	0.655488	-4.05121	5.1e-05	0.00358151
ENSG00000178445	GLDC	35.1614	-2.65052	1.00855	-2.62804	0.00858775	0.0913899
ENSG00000204366	ZBTB12	2.54867	-2.64992	0.865588	-3.06141	0.00220295	0.039919
ENSG00000232216	IGHV3-43	24.691	-2.64756	1.01809	-2.60051	0.00930848	0.0958782
ENSG00000169752	NRG4	276.892	2.64666	0.655426	4.03808	5.39e-05	0.00369874
ENSG00000279179	AL662907.2	41.2617	-2.64623	0.860088	-3.0767	0.00209309	0.038633
ENSG00000157613	CREB3L1	126.26	-2.64233	0.829009	-3.18734	0.0014359	0.0301569
ENSG00000130653	PNPLA7	1330.68	-2.63853	0.550755	-4.79076	1.66e-06	0.00035037
ENSG00000136379	ABHD17C	6680.07	2.6365	0.771519	3.41728	0.000632509	0.018064
ENSG00000229531	Z99127.1	4.49054	-2.63548	0.956058	-2.75661	0.0058404	0.0720002
ENSG00000151948	GLT1D1	428.158	-2.63095	1.02123	-2.57627	0.00998735	0.100149
ENSG00000004799	PDK4	1849.22	-2.63047	0.922392	-2.85179	0.00434733	0.05985
ENSG00000116785	CFHR3	6.91469	-2.62944	0.87133	-3.01773	0.00254678	0.0436083
ENSG00000235505	AP002004.1	35.87	-2.62549	0.827213	-3.1739	0.00150405	0.0309319
ENSG00000213958	KRT18P29	12.6158	2.623	0.944373	2.77751	0.00547775	0.0693436
ENSG00000197629	MPEG1	2197.41	-2.6221	0.798747	-3.28277	0.00102793	0.0244567
ENSG00000249302	FTH1P24	36.7701	-2.61761	0.956691	-2.73611	0.00621703	0.0752077
ENSG00000211900	IGHJ6	70.2915	-2.61664	0.771499	-3.39163	0.00069478	0.0190135
ENSG00000211970	IGHV4-61	50.4692	-2.61256	0.696526	-3.75084	0.000176242	0.00833194
ENSG00000166426	CRABP1	25.6282	-2.6057	0.765881	-3.40222	0.000668401	0.0185221
ENSG00000174038	C9orf131	35.7263	-2.60194	0.83834	-3.10367	0.00191133	0.0361451
ENSG00000139890	REM2	53.4307	-2.60165	0.856754	-3.03663	0.00239236	0.0418633
ENSG00000171621	SPSB1	1607.03	2.6008	0.772025	3.3688	0.00075497	0.0201415
ENSG00000251230	MIR3945HG	184.221	2.59977	0.868769	2.99248	0.00276722	0.045658
ENSG00000233786	CDC27P1	3.27561	2.59748	0.971744	2.67301	0.0075174	0.0841899
ENSG00000230637	AL022324.1	7.53301	-2.59394	0.96886	-2.67731	0.0074215	0.0835108
ENSG00000241911	TRBVB	75.2079	2.59368	0.976417	2.65633	0.00789965	0.0869189
ENSG00000235098	ANKRD65	571.099	2.59014	0.956012	2.70931	0.00674228	0.0792874
ENSG00000272949	AC093668.2	4.20985	-2.5855	0.723752	-3.57236	0.000353785	0.0125195
ENSG00000254481	PTP4A2P2	39.6613	-2.58209	0.687752	-3.75439	0.000173766	0.00831707
ENSG00000143297	FCRL5	71.2985	-2.58014	0.96249	-2.68069	0.00734701	0.0831896
ENSG00000144452	ABCA12	9.12731	-2.57747	0.87287	-2.95287	0.00314833	0.0488054
ENSG00000171657	GPR82	12.508	-2.57074	0.898826	-2.86011	0.00423499	0.0590768
ENSG00000168970	JMJD7-PLA2G4B	82.5869	-2.56937	0.85356	-3.01019	0.00261088	0.0443116
ENSG00000113100	CDH9	36.6681	-2.56738	0.850962	-3.01703	0.00255261	0.04365
ENSG00000050820	BCAR1	207.122	-2.56528	0.736985	-3.48078	0.000499951	0.0154538
ENSG00000186174	BCL9L	153.436	-2.56478	0.662741	-3.86997	0.000108851	0.00612551
ENSG00000267344	AC003070.1	21.257	-2.56246	0.696284	-3.68019	0.00023306	0.00985607
ENSG00000254704	AP002358.2	22.9135	-2.5537	0.96147	-2.65603	0.00790663	0.0869362
ENSG00000254030	IGLC5	19.1281	-2.54441	0.778689	-3.26756	0.0010848	0.0252847
ENSG00000239605	STPG4	6.08074	-2.54227	0.980625	-2.5925	0.00952812	0.0971537
ENSG00000070371	CLTCL1	174.006	-2.54142	0.542032	-4.6887	2.75e-06	0.000509163
ENSG00000154589	LY96	286.343	-2.53857	0.65931	-3.85035	0.00011795	0.00638195
ENSG00000072954	TMEM38A	132.126	-2.53629	0.900431	-2.81675	0.00485116	0.064185
ENSG00000099260	PALMD	59.7928	-2.53308	0.953517	-2.65657	0.00789401	0.0869189
ENSG00000285420	AC011342.1	12.8648	-2.52205	0.970882	-2.59769	0.00938536	0.0963157
ENSG00000152284	TCF7L1	77.1571	-2.51964	0.569032	-4.42795	9.51e-06	0.00116137
ENSG00000249947	XBP1P1	12.2017	-2.51885	0.954257	-2.63959	0.00830059	0.0896667
ENSG00000243910	TUBA4B	56.6745	-2.5175	0.424049	-5.93682	2.91e-09	2.35e-06
ENSG00000211689	TRGC1	1707.76	2.51642	0.684399	3.67683	0.000236147	0.00994562
ENSG00000213872	AC092798.1	34.9582	-2.51465	0.815417	-3.08388	0.00204322	0.037963
ENSG00000130300	PLVAP	825.237	-2.51374	0.705117	-3.56499	0.000363864	0.0127443
ENSG00000185559	DLK1	2438.57	2.51343	0.922078	2.72583	0.00641396	0.0767959
ENSG00000211914	IGHD6-19	11.0843	-2.51083	0.959383	-2.61713	0.00886722	0.0931406
ENSG00000218052	ADAMTS7P4	12.824	-2.50519	0.966179	-2.59288	0.00951753	0.0971537
ENSG00000127824	TUBA4A	5351.03	-2.49939	0.42835	-5.83493	5.38e-09	3.85e-06
ENSG00000158825	CDA	1181.25	-2.49132	0.951882	-2.61725	0.00886408	0.0931394
ENSG00000114529	C3orf52	114.716	-2.48566	0.797499	-3.11682	0.00182813	0.0352207
ENSG00000228727	SAPCD1	28.445	-2.48501	0.922845	-2.69277	0.00708607	0.0818924
ENSG00000178199	ZC3H12D	628.379	-2.4776	0.857375	-2.88975	0.0038555	0.0556131
ENSG00000260157	AC233702.1	4.36709	2.47706	0.724319	3.41985	0.000626559	0.0179608
ENSG00000012779	ALOX5	2336.44	-2.47512	0.848748	-2.9162	0.00354329	0.0526228
ENSG00000232000	CLCN3P1	4.39479	-2.47331	0.72226	-3.4244	0.000616167	0.0177954
ENSG00000224451	ATP5PBP1	16.8389	-2.47262	0.704022	-3.51213	0.000444524	0.0144165
ENSG00000135636	DYSF	1215.51	-2.47018	0.87475	-2.82387	0.00474477	0.0632916
ENSG00000118520	ARG1	457.14	-2.46705	0.770808	-3.2006	0.00137141	0.0294638
ENSG00000174500	GCSAM	127.547	-2.46648	0.823523	-2.99503	0.00274414	0.0454948
ENSG00000111057	KRT18	4331.37	2.44952	0.660996	3.7058	0.000210723	0.00915765
ENSG00000243466	IGKV1-5	1081.5	-2.44791	0.84897	-2.88339	0.00393417	0.0562831
ENSG00000075073	TACR2	14.8398	2.44656	0.816513	2.99636	0.00273225	0.0454445
ENSG00000215089	KRT18P11	18.482	2.44591	0.764943	3.1975	0.00138624	0.0296154
ENSG00000073712	FERMT2	86.4844	-2.43746	0.896428	-2.71908	0.00654632	0.0776953
ENSG00000111490	TBC1D30	61.3195	-2.42823	0.741773	-3.27355	0.00106204	0.0249595
ENSG00000104972	LILRB1	924.085	-2.42819	0.781593	-3.10672	0.00189174	0.035929
ENSG00000175489	LRRC25	2234.5	-2.41873	0.717338	-3.37182	0.000746739	0.0200086
ENSG00000110046	ATG2A	1443.41	-2.41773	0.547532	-4.4157	1.01e-05	0.00119684
ENSG00000213973	ZNF99	3.0056	-2.4172	0.707909	-3.41457	0.000638831	0.0181102
ENSG00000162004	CCDC78	29.8297	-2.41196	0.803044	-3.00352	0.00266877	0.0448246
ENSG00000211679	IGLC3	10215.9	-2.4118	0.877174	-2.74951	0.00596848	0.0730623
ENSG00000153283	CD96	934.616	-2.40734	0.869987	-2.7671	0.00565572	0.0707048
ENSG00000273727	RF00003	26.5464	2.40531	0.74314	3.23669	0.00120927	0.0273747
ENSG00000178695	KCTD12	247.565	-2.40497	0.779808	-3.08405	0.00204203	0.037963
ENSG00000250990	AC098851.1	4.9356	-2.39469	0.915987	-2.61432	0.00894046	0.093718
ENSG00000163736	PPBP	8140.82	-2.39306	0.80681	-2.96607	0.00301632	0.0480411
ENSG00000250771	AC106865.1	22.5715	-2.39279	0.909548	-2.63075	0.00851977	0.0909179
ENSG00000171208	NETO2	754.212	2.38925	0.747692	3.1955	0.00139589	0.0296848
ENSG00000222724	RNU2-63P	84.2014	2.38491	0.60937	3.91373	9.09e-05	0.00540144
ENSG00000281112	AL355480.2	8.96678	-2.37921	0.793986	-2.99654	0.00273065	0.0454424
ENSG00000114554	PLXNA1	518.267	-2.37652	0.637289	-3.72911	0.00019216	0.00883143
ENSG00000170458	CD14	2557.3	-2.37605	0.898355	-2.64489	0.00817173	0.0888672
ENSG00000187144	SPATA21	36.9683	-2.37261	0.670574	-3.53818	0.000402889	0.0136006
ENSG00000158869	FCER1G	3516.56	-2.36974	0.667781	-3.54867	0.000387181	0.013289
ENSG00000179242	CDH4	897.572	2.36829	0.788245	3.00451	0.00266005	0.0447514
ENSG00000236526	AL035448.1	53.1253	-2.3678	0.716777	-3.30339	0.00095523	0.0233217
ENSG00000182326	C1S	502	-2.36774	0.902292	-2.62414	0.00868673	0.0920614
ENSG00000237111	IGHJ3P	143.563	-2.36647	0.723968	-3.26875	0.00108023	0.025216
ENSG00000155465	SLC7A7	490.119	-2.36591	0.804717	-2.94005	0.00328159	0.0500894
ENSG00000108924	HLF	576.237	-2.36141	0.756767	-3.12039	0.00180612	0.0349278
ENSG00000213420	GPC2	215.738	-2.35857	0.651834	-3.61836	0.00029647	0.0113525
ENSG00000172243	CLEC7A	747.098	-2.35725	0.83925	-2.80876	0.00497331	0.0653214
ENSG00000117643	MAN1C1	587.609	-2.3502	0.809662	-2.90269	0.00369971	0.0540593
ENSG00000244265	SIAH2-AS1	30.1083	-2.34768	0.672618	-3.49036	0.000482365	0.0151132
ENSG00000242472	IGHJ5	94.7743	-2.34643	0.673931	-3.4817	0.000498237	0.0154194
ENSG00000179776	CDH5	527.319	-2.34442	0.773514	-3.03087	0.00243852	0.0422718
ENSG00000130635	COL5A1	2204.64	-2.34337	0.816207	-2.87105	0.00409117	0.0579369
ENSG00000254208	AC011773.1	71.7712	-2.3358	0.580556	-4.02338	5.74e-05	0.00387333
ENSG00000246985	SOCS2-AS1	800.602	-2.33089	0.637199	-3.65803	0.000254161	0.0103778
ENSG00000233893	EZR-AS1	8.03525	-2.32969	0.881955	-2.64151	0.00825369	0.0892929
ENSG00000184226	PCDH9	1092.22	-2.32866	0.732677	-3.17829	0.00148148	0.0305904
ENSG00000186564	FOXD2	19.4836	-2.3272	0.805355	-2.88966	0.00385662	0.0556131
ENSG00000124181	PLCG1	782.918	-2.32525	0.641235	-3.6262	0.000287619	0.011223
ENSG00000167549	CORO6	213.825	-2.32288	0.571189	-4.06676	4.77e-05	0.00345067
ENSG00000234630	AC245060.2	160.096	-2.31674	0.598521	-3.87078	0.000108486	0.00611713
ENSG00000143167	GPA33	393.926	2.31607	0.796051	2.90945	0.00362067	0.0533602
ENSG00000128594	LRRC4	62.2582	-2.31588	0.819365	-2.82643	0.00470697	0.0629512
ENSG00000111912	NCOA7	14980.3	2.31461	0.54012	4.28536	1.82e-05	0.00181188
ENSG00000265396	MIR3128	5.62436	-2.31162	0.705186	-3.27802	0.00104537	0.024662
ENSG00000211890	IGHA2	6490.32	-2.30643	0.770445	-2.99364	0.00275673	0.0456053
ENSG00000079215	SLC1A3	455.51	-2.3053	0.754275	-3.05631	0.00224081	0.0403931
ENSG00000268592	AL355312.3	10.966	-2.30378	0.563803	-4.08615	4.39e-05	0.00330958
ENSG00000280247	AC005578.1	9.67702	2.30025	0.810656	2.83752	0.00454657	0.0614196
ENSG00000114013	CD86	612.198	-2.29989	0.855647	-2.68789	0.0071905	0.0824791
ENSG00000121039	RDH10	1037.37	2.29793	0.785354	2.92598	0.00343378	0.0516191
ENSG00000169313	P2RY12	86.4306	-2.29776	0.791331	-2.90366	0.00368825	0.0539978
ENSG00000123095	BHLHE41	556.979	2.29478	0.867968	2.64386	0.00819672	0.0889191
ENSG00000215692	AC114730.1	34.2187	2.29153	0.758011	3.02308	0.00250213	0.0430543
ENSG00000228485	GRK5-IT1	16.2473	-2.29026	0.85354	-2.68324	0.00729117	0.0829414
ENSG00000201558	RNVU1-6	71.4405	2.28963	0.594241	3.85303	0.000116667	0.00634329
ENSG00000012124	CD22	1328.5	-2.28855	0.840746	-2.72205	0.00648789	0.0773859
ENSG00000236188	PRKX-AS1	18.2612	-2.28731	0.868142	-2.63472	0.0084206	0.0902035
ENSG00000146426	TIAM2	83.9948	-2.28689	0.663341	-3.44753	0.000565739	0.0166806
ENSG00000275325	PDCD6IPP1	126.009	2.28659	0.811186	2.81883	0.00481992	0.0639892
ENSG00000279928	FO538757.2	33.6147	-2.28389	0.744547	-3.06749	0.00215862	0.0393006
ENSG00000166444	ST5	118.153	-2.28066	0.799781	-2.8516	0.00435	0.05985
ENSG00000175727	MLXIP	16658.6	-2.27564	0.367163	-6.19789	5.72e-10	5.87e-07
ENSG00000175773	AP002986.1	7.58908	-2.27459	0.720621	-3.15643	0.00159714	0.0321381
ENSG00000169962	TAS1R3	66.6938	-2.26892	0.795771	-2.85123	0.00435507	0.05985
ENSG00000179342	AC008267.1	4.03693	-2.26792	0.863479	-2.62649	0.00862716	0.0916397
ENSG00000121053	EPX	4035.2	-2.26676	0.834246	-2.71714	0.00658491	0.078063
ENSG00000198400	NTRK1	773.282	2.25984	0.788488	2.86604	0.00415636	0.0583767
ENSG00000136826	KLF4	1072.3	-2.25447	0.741638	-3.03986	0.0023669	0.0416876
ENSG00000271200	AC099791.2	15.0401	-2.24663	0.710637	-3.16143	0.00156994	0.0317359
ENSG00000240776	AC079944.1	9.92004	2.24261	0.756826	2.96318	0.00304478	0.0481336
ENSG00000221510	MIR548O	7.07269	-2.24248	0.845978	-2.65075	0.00803124	0.0877372
ENSG00000064989	CALCRL	1554.11	2.24129	0.792893	2.82672	0.00470268	0.062921
ENSG00000284638	AC005551.1	12.2926	-2.23821	0.865177	-2.587	0.00968156	0.0982507
ENSG00000147408	CSGALNACT1	1402.43	-2.23223	0.666489	-3.34923	0.000810352	0.0210073
ENSG00000119919	NKX2-3	877.308	2.23145	0.812684	2.74578	0.00603679	0.0736642
ENSG00000105409	ATP1A3	27.2867	-2.23062	0.573164	-3.89178	9.95e-05	0.00574804
ENSG00000206585	RNVU1-7	17.2184	2.22	0.827109	2.68405	0.00727365	0.0828922
ENSG00000202290	RNA5SP37	20.6242	-2.21824	0.762675	-2.9085	0.00363168	0.0534625
ENSG00000211625	IGKV3D-20	120.308	-2.21767	0.823064	-2.69441	0.00705143	0.081799
ENSG00000263657	AC023389.1	22.9205	-2.21734	0.541815	-4.09243	4.27e-05	0.00322904
ENSG00000266709	AC005224.4	141.086	-2.21655	0.836029	-2.65128	0.00801868	0.0876988
ENSG00000225822	UBXN7-AS1	114.762	-2.20949	0.511463	-4.31994	1.56e-05	0.0016213
ENSG00000254777	AC022182.1	67.7211	-2.20379	0.805346	-2.73645	0.00621063	0.0751598
ENSG00000207808	MIR27A	109.57	2.20165	0.840762	2.61863	0.00882833	0.0929224
ENSG00000259845	HERC2P10	118.566	2.20101	0.571048	3.85433	0.000116047	0.00633463
ENSG00000010610	CD4	3944.54	-2.20083	0.53887	-4.08415	4.42e-05	0.00332193
ENSG00000254995	STX16-NPEPL1	70.9675	-2.20014	0.773431	-2.84465	0.00444597	0.0606192
ENSG00000241281	AC010683.1	9.23215	2.19735	0.836745	2.62607	0.00863768	0.0916994
ENSG00000230724	LINC01001	32.7897	-2.19664	0.514282	-4.27126	1.94e-05	0.00189968
ENSG00000248890	HHIP-AS1	363.883	-2.1958	0.818505	-2.6827	0.00730299	0.0829414
ENSG00000253878	AC087752.3	71.0965	-2.19294	0.601816	-3.64387	0.000268564	0.0106964
ENSG00000226647	AL365356.1	6.9036	-2.19244	0.713183	-3.07416	0.00211094	0.0388005
ENSG00000100307	CBX7	271.129	-2.19216	0.645271	-3.39727	0.000680628	0.0187933
ENSG00000184937	WT1	367.289	2.19155	0.653181	3.3552	0.000793085	0.0207802
ENSG00000092421	SEMA6A	234.187	-2.18179	0.535131	-4.07711	4.56e-05	0.00339093
ENSG00000225357	RPF2P1	17.8239	2.18177	0.514753	4.23848	2.25e-05	0.00209312
ENSG00000132965	ALOX5AP	3243.83	-2.1789	0.74466	-2.92603	0.00343315	0.0516191
ENSG00000280063	AC012676.5	60.9016	-2.17402	0.723384	-3.00535	0.00265273	0.0446771
ENSG00000171877	FRMD5	172.996	-2.17193	0.706095	-3.07598	0.00209811	0.0387026
ENSG00000085733	CTTN	424.705	-2.16957	0.809717	-2.67941	0.00737517	0.0833552
ENSG00000279275	AP002505.2	98.3994	-2.16864	0.754778	-2.87321	0.00406318	0.0576731
ENSG00000236364	AL358115.1	9.10351	-2.16538	0.771127	-2.80808	0.00498385	0.0653762
ENSG00000233971	RPS20P10	36.9094	2.16476	0.75742	2.85807	0.00426223	0.0592688
ENSG00000170801	HTRA3	3187.2	2.16191	0.582741	3.7099	0.000207345	0.00909335
ENSG00000120833	SOCS2	6740.39	-2.16088	0.554948	-3.89385	9.87e-05	0.00570982
ENSG00000172575	RASGRP1	332.463	-2.15909	0.810476	-2.66397	0.00772235	0.0854593
ENSG00000272836	AL022328.1	21.3607	-2.15813	0.782046	-2.7596	0.00578721	0.0715545
ENSG00000229758	DYNLT3P2	3.24083	-2.1559	0.715137	-3.01466	0.00257264	0.0438811
ENSG00000254285	KRT8P3	31.8144	2.15496	0.566915	3.80121	0.000143991	0.00732192
ENSG00000159433	STARD9	463.988	-2.15425	0.424264	-5.07762	3.82e-07	0.0001165
ENSG00000188305	PEAK3	171.294	-2.14961	0.672712	-3.19544	0.00139616	0.0296848
ENSG00000140932	CMTM2	308.233	-2.14498	0.702271	-3.05434	0.00225554	0.0405616
ENSG00000145416	2022-03-01	112.198	-2.14336	0.801832	-2.67308	0.00751582	0.0841899
ENSG00000169896	ITGAM	1683.67	-2.13983	0.752748	-2.84269	0.00447339	0.0607852
ENSG00000154721	JAM2	152.013	-2.13759	0.724753	-2.9494	0.00318392	0.049124
ENSG00000168675	LDLRAD4	2192.38	-2.13749	0.522124	-4.09383	4.24e-05	0.00322547
ENSG00000214967	NPIPA7	3.7425	-2.13654	0.600645	-3.55707	0.000375014	0.0130606
ENSG00000170482	SLC23A1	141.936	-2.13553	0.654757	-3.26157	0.00110799	0.0256286
ENSG00000108691	CCL2	771.988	-2.13477	0.689617	-3.09559	0.00196422	0.036851
ENSG00000267852	AC119396.2	7.74231	-2.12824	0.824234	-2.58209	0.00982047	0.0990314
ENSG00000160062	ZBTB8A	292.967	2.1271	0.536957	3.96139	7.45e-05	0.00466276
ENSG00000106333	PCOLCE	263.829	-2.12186	0.772639	-2.74625	0.00602802	0.0735863
ENSG00000237784	AC097713.2	13.6114	2.12174	0.517936	4.09654	4.19e-05	0.00320122
ENSG00000243960	AL390195.1	2.82202	-2.1207	0.803878	-2.63809	0.0083375	0.0897819
ENSG00000248290	TNXA	6.01455	-2.12007	0.781721	-2.71205	0.00668687	0.0788165
ENSG00000114737	CISH	2756.33	2.11623	0.611568	3.46034	0.000539497	0.0162044
ENSG00000228976	SUMO2P8	10.5204	-2.11562	0.751731	-2.81433	0.00488792	0.0645579
ENSG00000102804	TSC22D1	63960.5	2.11291	0.597828	3.53432	0.000408827	0.0137558
ENSG00000148926	ADM	2306.83	-2.11256	0.630651	-3.34982	0.000808653	0.0210073
ENSG00000162407	PLPP3	648.782	-2.10827	0.7275	-2.89796	0.00375598	0.0545965
ENSG00000250734	AL391335.1	5.68293	-2.09362	0.702352	-2.98088	0.00287424	0.0467207
ENSG00000248671	AP002495.1	17.6246	-2.08882	0.457953	-4.56122	5.09e-06	0.000749173
ENSG00000130758	MAP3K10	109.771	-2.08737	0.48732	-4.28336	1.84e-05	0.00182242
ENSG00000171914	TLN2	141.513	-2.08736	0.688466	-3.0319	0.00243018	0.0421897
ENSG00000277476	AC005332.6	34.7878	-2.08411	0.628805	-3.31439	0.000918422	0.0227416
ENSG00000180616	SSTR2	158.462	2.084	0.714412	2.91708	0.00353321	0.0525746
ENSG00000245213	AC105285.1	268.72	-2.08319	0.477429	-4.36334	1.28e-05	0.00142881
ENSG00000105694	ELOCP28	10.5732	-2.08295	0.670993	-3.10428	0.00190744	0.0360936
ENSG00000273137	AL022328.2	25.0271	-2.08269	0.754625	-2.7599	0.00578189	0.0715545
ENSG00000233538	AC017104.3	60.3515	-2.08147	0.795236	-2.61742	0.00885975	0.0931257
ENSG00000026036	RTEL1-TNFRSF6B	100.881	-2.07966	0.414496	-5.01732	5.24e-07	0.00014533
ENSG00000136828	RALGPS1	143.297	-2.07649	0.436884	-4.75296	2e-06	0.000402308
ENSG00000130518	IQCN	193.72	-2.07396	0.735206	-2.82092	0.00478861	0.0636558
ENSG00000250138	AC139495.3	91.1853	-2.07189	0.680369	-3.04524	0.00232492	0.0412936
ENSG00000227854	AL590135.1	34.7843	2.06949	0.448542	4.61381	3.95e-06	0.000640622
ENSG00000199377	RNU5F-1	93.0614	2.06462	0.71416	2.89098	0.00384048	0.0555103
ENSG00000240919	AC022034.3	24.568	2.06318	0.4545	4.53945	5.64e-06	0.000797969
ENSG00000196747	HIST1H2AI	214.098	2.06272	0.646218	3.19199	0.00141296	0.0298975
ENSG00000104368	PLAT	303.235	-2.05868	0.780216	-2.6386	0.00832489	0.0897589
ENSG00000076555	ACACB	425.243	-2.05116	0.646068	-3.17484	0.00149922	0.0308532
ENSG00000189319	FAM53B	2434.42	-2.04814	0.539242	-3.79818	0.000145763	0.00736882
ENSG00000175061	LRRC75A-AS1	18322.9	2.0478	0.468434	4.37159	1.23e-05	0.00139612
ENSG00000230595	RSL24D1P2	11.9418	2.04629	0.653576	3.13091	0.00174265	0.0341177
ENSG00000108821	COL1A1	485.55	-2.04075	0.77736	-2.62523	0.00865912	0.091853
ENSG00000257616	AC055716.2	8.48206	2.04056	0.73875	2.76218	0.00574169	0.0713555
ENSG00000102575	ACP5	882.065	-2.03981	0.661792	-3.08226	0.00205437	0.0381012
ENSG00000252128	RF00086	23.2027	2.03745	0.688906	2.95751	0.00310133	0.0483699
ENSG00000243566	UPK3B	7.02589	-2.03279	0.751528	-2.70488	0.00683299	0.0800789
ENSG00000200169	RNU5D-1	36.5202	2.02604	0.75719	2.67574	0.00745651	0.0836907
ENSG00000261556	SMG1P7	55.7789	-2.01974	0.614526	-3.28667	0.00101381	0.0242519
ENSG00000239291	AC002558.1	55.2565	-2.01916	0.703502	-2.87015	0.00410277	0.0579997
ENSG00000214089	RPL9P21	80.793	2.0154	0.431081	4.67523	2.94e-06	0.000523606
ENSG00000231544	RSL24D1P11	29.3873	2.01136	0.505891	3.97588	7.01e-05	0.00447301
ENSG00000256663	AC112777.1	347.149	-2.01042	0.716514	-2.80584	0.0050185	0.0656908
ENSG00000234222	LIX1L-AS1	11.2748	-2.00981	0.598869	-3.35601	0.000790755	0.0207684
ENSG00000182885	ADGRG3	2461.99	-2.0048	0.72415	-2.76849	0.00563165	0.0705428
ENSG00000163376	KBTBD8	520.079	2.00282	0.637128	3.14351	0.00166935	0.0330577
ENSG00000226117	AC090844.1	12.0125	2.00239	0.674636	2.96811	0.00299641	0.0479224
ENSG00000137496	IL18BP	380.811	-2.00164	0.584691	-3.42341	0.000618411	0.0178175
ENSG00000147650	LRP12	1662.99	2.00007	0.531673	3.76184	0.000168668	0.00815193
ENSG00000264829	AC087749.2	49.2498	-1.9958	0.599574	-3.3287	0.00087252	0.0220056
ENSG00000090674	MCOLN1	4553.12	-1.99552	0.750095	-2.66036	0.00780574	0.0861345
ENSG00000248714	AC091180.2	17.2728	-1.99369	0.714832	-2.78904	0.00528651	0.0676391
ENSG00000132465	JCHAIN	3058.22	-1.99178	0.629193	-3.16561	0.00154757	0.0314074
ENSG00000229127	AC007038.1	26.7331	-1.98908	0.668908	-2.97363	0.00294302	0.0473873
ENSG00000235314	LINC00957	23.9295	-1.989	0.529427	-3.7569	0.000172033	0.00826267
ENSG00000235290	HLA-W	5.29143	-1.98716	0.543658	-3.65516	0.00025702	0.010398
ENSG00000108375	RNF43	187.043	-1.98641	0.539453	-3.68227	0.000231164	0.00980283
ENSG00000242067	RPL9P28	111.331	1.98618	0.458271	4.33408	1.46e-05	0.00155928
ENSG00000267255	AC011498.3	32.1508	-1.9836	0.696814	-2.84668	0.00441782	0.0603422
ENSG00000143819	EPHX1	626.955	-1.97999	0.539469	-3.67025	0.000242311	0.0101084
ENSG00000179163	FUCA1	3264.68	-1.97921	0.760539	-2.60238	0.0092579	0.0955171
ENSG00000261512	AC092368.3	62.5673	-1.97453	0.469907	-4.20195	2.65e-05	0.00233476
ENSG00000200665	RNU6-1188P	15.8851	-1.97416	0.705571	-2.79796	0.00514271	0.0663851
ENSG00000112297	CRYBG1	1344.3	-1.97392	0.552732	-3.5712	0.000355356	0.0125607
ENSG00000240553	AL031428.1	27.6965	-1.97272	0.595226	-3.31424	0.000918913	0.0227416
ENSG00000239280	AC108693.1	22.8354	-1.97124	0.705253	-2.79508	0.00518862	0.0668376
ENSG00000232858	RPL34P27	25.2219	1.96667	0.530247	3.70898	0.000208097	0.00911335
ENSG00000228938	SNRPD2P1	14.4962	-1.96574	0.745934	-2.63528	0.00840691	0.0901414
ENSG00000188215	DCUN1D3	537.955	1.96526	0.457822	4.29263	1.77e-05	0.00175924
ENSG00000273724	AC106782.5	11.2967	-1.96261	0.482181	-4.07028	4.7e-05	0.00343706
ENSG00000106992	AK1	110.602	-1.96115	0.563945	-3.47756	0.000505995	0.0155713
ENSG00000229067	AL714022.1	22.6615	1.95386	0.66226	2.95029	0.00317477	0.0490671
ENSG00000197081	IGF2R	1504.65	-1.95342	0.627824	-3.11141	0.00186195	0.0356269
ENSG00000265828	MIR3939	5.48929	-1.95178	0.594801	-3.28141	0.0010329	0.0245495
ENSG00000185130	HIST1H2BL	25.8005	1.95178	0.604836	3.22696	0.00125113	0.0279813
ENSG00000171476	HOPX	11082.6	1.94899	0.696287	2.79912	0.00512424	0.0663328
ENSG00000102760	RGCC	10806.4	1.94785	0.673897	2.89043	0.00384719	0.0555551
ENSG00000141096	DPEP3	107.507	-1.94674	0.681839	-2.85514	0.00430183	0.0595506
ENSG00000185697	MYBL1	85.4562	-1.94611	0.752938	-2.58469	0.00974658	0.0985122
ENSG00000141441	GAREM1	38.2126	-1.94463	0.711218	-2.73423	0.00625272	0.0755198
ENSG00000110852	CLEC2B	9565.57	1.9421	0.594511	3.26671	0.00108804	0.0253192
ENSG00000225885	AC023590.1	6.53325	-1.9357	0.740117	-2.61539	0.00891245	0.09352
ENSG00000149591	TAGLN	196.702	-1.93397	0.666249	-2.90278	0.00369868	0.0540593
ENSG00000224373	IGHV4-59	179.659	-1.92922	0.707353	-2.72738	0.006384	0.0766852
ENSG00000237499	AL357060.1	516.115	-1.92689	0.452124	-4.26185	2.03e-05	0.00194856
ENSG00000136026	CKAP4	2385.96	-1.92586	0.713066	-2.70082	0.0069169	0.0807554
ENSG00000154479	CCDC173	106.967	1.92531	0.699485	2.75247	0.00591481	0.0725495
ENSG00000233648	AC010095.1	8.88251	1.92388	0.662702	2.90308	0.00369515	0.0540593
ENSG00000230322	AL136320.1	54.0623	-1.92181	0.5021	-3.82754	0.000129432	0.00674502
ENSG00000168679	SLC16A4	42.8189	-1.92134	0.685045	-2.80469	0.00503654	0.0657495
ENSG00000072682	P4HA2	280.55	-1.92033	0.609204	-3.1522	0.00162045	0.0324796
ENSG00000249241	LINC02265	26.0851	1.91968	0.684368	2.80505	0.00503089	0.0657495
ENSG00000108465	CDK5RAP3	388.059	-1.91804	0.547959	-3.50034	0.000464673	0.0147332
ENSG00000071564	TCF3	14199.9	-1.91773	0.406772	-4.71451	2.42e-06	0.000457639
ENSG00000159885	ZNF222	418.255	1.91747	0.521173	3.67915	0.000234015	0.00986935
ENSG00000185950	IRS2	5213.19	-1.91591	0.487925	-3.92666	8.61e-05	0.00518947
ENSG00000281207	SLFNL1-AS1	17.7084	-1.91581	0.670259	-2.85831	0.00425898	0.0592688
ENSG00000237818	RPS3AP29	163.305	1.91437	0.493912	3.87594	0.000106214	0.00602211
ENSG00000139055	ERP27	206.956	-1.91333	0.427322	-4.47749	7.55e-06	0.000972873
ENSG00000278963	AC005921.3	127.693	-1.9072	0.441605	-4.31878	1.57e-05	0.0016213
ENSG00000160298	C21orf58	753.571	-1.90693	0.490343	-3.88896	0.000100673	0.00579332
ENSG00000232587	EEF1A1P3	96.7126	-1.90646	0.584593	-3.26118	0.0011095	0.0256444
ENSG00000239503	MARK2P8	80.507	-1.90608	0.718112	-2.65429	0.00794757	0.0872275
ENSG00000260382	AC087481.1	42.7573	1.90117	0.422711	4.49756	6.87e-06	0.00091268
ENSG00000223972	DDX11L1	46.0345	-1.90064	0.672993	-2.82415	0.0047406	0.0632634
ENSG00000122966	CIT	550.278	-1.89962	0.642815	-2.95515	0.00312514	0.0485825
ENSG00000230897	RPS18P12	310.51	1.89905	0.456358	4.16132	3.16e-05	0.00266892
ENSG00000254884	PRR13P2	49.3246	-1.89797	0.570158	-3.32885	0.000872065	0.0220056
ENSG00000205560	CPT1B	14.8803	-1.89013	0.619084	-3.05311	0.00226482	0.0406809
ENSG00000177272	KCNA3	982.865	-1.88997	0.631524	-2.99272	0.00276505	0.045658
ENSG00000132386	SERPINF1	328.677	-1.8887	0.655309	-2.88216	0.00394962	0.0564517
ENSG00000151287	TEX30	3220.01	1.88712	0.45892	4.11208	3.92e-05	0.00304072
ENSG00000125430	HS3ST3B1	475.853	-1.88612	0.588147	-3.20689	0.00134179	0.0290708
ENSG00000130787	HIP1R	1763.91	-1.88313	0.495433	-3.80098	0.000144122	0.00732192
ENSG00000268001	CARD8-AS1	898.212	1.88265	0.570048	3.30262	0.000957876	0.0233493
ENSG00000226650	KIF4B	6.00757	-1.88014	0.698963	-2.68989	0.00714748	0.0821693
ENSG00000178809	TRIM73	59.1261	-1.87689	0.267626	-7.01313	2.33e-12	4.48e-09
ENSG00000052802	MSMO1	2436.62	1.86382	0.580086	3.21301	0.0013135	0.0286597
ENSG00000142733	MAP3K6	560.46	-1.86045	0.62657	-2.96926	0.00298514	0.0478166
ENSG00000103966	EHD4	1561.3	-1.85766	0.514032	-3.61391	0.000301618	0.0114783
ENSG00000234028	AC062029.1	132.289	-1.85529	0.696074	-2.66536	0.0076906	0.0852961
ENSG00000180189	HMGB1P14	19.8089	-1.85441	0.663387	-2.79536	0.00518412	0.0668077
ENSG00000157992	KRTCAP3	81.8683	-1.85387	0.57887	-3.20257	0.00136209	0.0293779
ENSG00000205871	RPS3AP47	1640.29	1.85159	0.496579	3.72869	0.00019248	0.00883143
ENSG00000259856	RAB43P1	8.11597	-1.8512	0.646837	-2.86193	0.00421074	0.0588939
ENSG00000139714	MORN3	63.0979	-1.85033	0.660624	-2.80089	0.00509626	0.066146
ENSG00000197256	KANK2	2126.21	-1.84968	0.407358	-4.54067	5.61e-06	0.000797969
ENSG00000087303	NID2	284.445	-1.84949	0.53276	-3.47154	0.000517489	0.0157768
ENSG00000243007	RPL12P35	10.9986	1.84783	0.60616	3.04841	0.00230052	0.0411892
ENSG00000246859	STARD4-AS1	89.2373	-1.84769	0.676735	-2.73029	0.00632778	0.0762181
ENSG00000188549	CCDC9B	283.672	-1.84725	0.541879	-3.40897	0.000652098	0.0183679
ENSG00000257675	BTBD10P1	6.68798	1.84558	0.599116	3.08051	0.00206647	0.0382795
ENSG00000257564	AC068993.1	37.8525	1.84305	0.324806	5.67431	1.39e-08	8.24e-06
ENSG00000118515	SGK1	2338.48	-1.8393	0.640998	-2.86943	0.00411212	0.0580467
ENSG00000170271	FAXDC2	713.889	-1.83648	0.562076	-3.26731	0.00108573	0.0252847
ENSG00000176438	SYNE3	1546.81	-1.83218	0.619452	-2.95774	0.00309905	0.0483699
ENSG00000197217	ENTPD4	1781.23	-1.83183	0.360135	-5.08652	3.65e-07	0.000113722
ENSG00000236570	RAD23BP1	10.1099	1.83102	0.652865	2.8046	0.00503794	0.0657495
ENSG00000205702	CYP2D7	30.1777	-1.82928	0.703863	-2.59892	0.00935184	0.0960999
ENSG00000232385	RPS3AP25	747.222	1.82886	0.498516	3.6686	0.000243885	0.0101365
ENSG00000234741	GAS5	10990.2	1.82723	0.559493	3.26586	0.00109132	0.0253747
ENSG00000198838	RYR3	155	-1.81976	0.682972	-2.66448	0.00771073	0.0854229
ENSG00000276043	UHRF1	10229.4	-1.81967	0.649771	-2.80047	0.0051028	0.0662031
ENSG00000143434	SEMA6C	393.959	-1.81885	0.391441	-4.64655	3.38e-06	0.000564753
ENSG00000277157	HIST1H4D	15.4925	1.81788	0.699781	2.59779	0.00938256	0.0963157
ENSG00000236992	RPL12P12	111.785	1.81351	0.397766	4.55924	5.13e-06	0.00075266
ENSG00000280211	AC106886.4	10.8861	-1.813	0.69959	-2.59152	0.00955522	0.097345
ENSG00000187193	MT1X	211.574	-1.81266	0.553243	-3.27643	0.0010513	0.0247638
ENSG00000197746	PSAP	105189	-1.81247	0.416482	-4.35186	1.35e-05	0.00146265
ENSG00000184313	MROH7	13.9915	-1.80912	0.653807	-2.76706	0.00565648	0.0707048
ENSG00000168497	CAVIN2	6071.3	-1.80901	0.639717	-2.82782	0.0046866	0.0627878
ENSG00000185304	RGPD2	55.3936	-1.80876	0.610264	-2.96389	0.00303778	0.0481336
ENSG00000186130	ZBTB6	481.427	1.80828	0.651151	2.77705	0.00548544	0.0693838
ENSG00000231747	AC079922.1	186.391	1.80638	0.365314	4.94474	7.62e-07	0.000189306
ENSG00000166482	MFAP4	2237.89	1.80501	0.65406	2.7597	0.00578549	0.0715545
ENSG00000163126	ANKRD23	20.5927	-1.80357	0.676676	-2.66534	0.00769097	0.0852961
ENSG00000108219	TSPAN14	8718.6	-1.80224	0.514099	-3.50562	0.000455542	0.0145921
ENSG00000242060	RPS3AP49	353.826	1.79563	0.495139	3.62651	0.000287277	0.011223
ENSG00000272430	AL356056.3	42.7354	1.79402	0.494821	3.62559	0.000288301	0.0112353
ENSG00000104756	KCTD9	1716.57	1.79367	0.62158	2.88566	0.00390596	0.0560097
ENSG00000163734	CXCL3	2936.01	1.79339	0.638103	2.8105	0.00494648	0.0650522
ENSG00000106351	AGFG2	410.077	-1.79187	0.440435	-4.06841	4.73e-05	0.00343706
ENSG00000140284	SLC27A2	2215.11	1.7896	0.650082	2.75288	0.00590734	0.0725156
ENSG00000257698	AC084033.3	2459.67	1.78679	0.489247	3.65212	0.000260084	0.0104757
ENSG00000047634	SCML1	108.942	-1.78582	0.598488	-2.98388	0.0028462	0.0464366
ENSG00000169242	EFNA1	1547.75	1.785	0.572833	3.1161	0.00183261	0.0352628
ENSG00000278588	HIST1H2BI	21.3097	1.78447	0.596582	2.99116	0.00277924	0.0457368
ENSG00000178429	RPS3AP5	1845.32	1.78253	0.489938	3.63828	0.00027446	0.0108749
ENSG00000154545	MAGED4	42.0704	-1.78107	0.638445	-2.7897	0.00527577	0.0675949
ENSG00000115339	GALNT3	1333.08	1.77971	0.553201	3.21711	0.0012949	0.0284136
ENSG00000135476	ESPL1	605.346	-1.7795	0.489415	-3.63597	0.000276936	0.0109308
ENSG00000075651	PLD1	1852.53	1.77525	0.625051	2.84017	0.00450897	0.0610993
ENSG00000213757	AC020898.1	1448.58	1.77501	0.501312	3.54072	0.000399034	0.0135001
ENSG00000158769	F11R	3867.31	1.77017	0.479854	3.68897	0.000225162	0.00960118
ENSG00000058453	CROCC	1295.19	-1.76953	0.362732	-4.87835	1.07e-06	0.000242174
ENSG00000214784	AC010468.1	935.706	1.76952	0.49068	3.60627	0.000310631	0.0117055
ENSG00000218069	RSL24D1P1	47.623	1.76948	0.47251	3.74485	0.000180501	0.00848409
ENSG00000025708	TYMP	3145.36	-1.76948	0.65656	-2.69507	0.00703733	0.081727
ENSG00000148773	MKI67	3346.53	-1.766	0.498628	-3.54171	0.000397544	0.0134644
ENSG00000151729	SLC25A4	259.798	-1.76368	0.656425	-2.68679	0.00721422	0.0824964
ENSG00000004777	ARHGAP33	503.335	-1.76166	0.455386	-3.8685	0.000109509	0.00612992
ENSG00000236991	EDRF1-AS1	24.7928	-1.76143	0.626445	-2.81179	0.0049267	0.0648383
ENSG00000254461	AP001107.4	17.2133	-1.76032	0.660717	-2.66426	0.00771584	0.0854397
ENSG00000277075	HIST1H2AE	842.171	1.75976	0.682476	2.5785	0.00992313	0.0998051
ENSG00000103811	CTSH	1074.71	-1.75943	0.516735	-3.40489	0.000661896	0.0184582
ENSG00000167106	FAM102A	1785.79	-1.75906	0.557765	-3.15377	0.00161177	0.0323478
ENSG00000237017	AC245052.4	44.9068	-1.75538	0.655702	-2.67711	0.00742608	0.0835318
ENSG00000274038	AC007014.2	68.2329	-1.75525	0.506603	-3.46475	0.000530719	0.0160819
ENSG00000226396	AL031727.1	185.547	1.75484	0.546646	3.2102	0.00132641	0.0288187
ENSG00000221995	TIAF1	138.796	-1.75256	0.628201	-2.78981	0.00527385	0.0675949
ENSG00000221241	SNORD88A	5.32917	-1.75101	0.609677	-2.87203	0.0040785	0.0578107
ENSG00000166128	RAB8B	6399.25	1.74659	0.508217	3.43671	0.00058883	0.0172066
ENSG00000176533	GNG7	2542.84	-1.74561	0.455351	-3.83354	0.000126312	0.00664736
ENSG00000225568	AC093155.1	10.3194	1.73988	0.553416	3.1439	0.00166715	0.0330499
ENSG00000125089	SH3TC1	9626.65	-1.73796	0.521273	-3.33407	0.000855866	0.0218125
ENSG00000277610	RNVU1-4	75.0973	1.73452	0.659129	2.63153	0.00850021	0.0907632
ENSG00000205784	ARRDC5	54.63	-1.73283	0.520618	-3.3284	0.00087345	0.0220056
ENSG00000224114	AL591846.1	1050.89	1.73186	0.595135	2.91004	0.00361388	0.0533368
ENSG00000176788	BASP1	6147.89	-1.73068	0.664838	-2.60316	0.00923692	0.0954301
ENSG00000254170	AC008802.1	233.905	1.72694	0.489519	3.52782	0.00041899	0.0139756
ENSG00000267156	TPMTP1	15.7641	1.72669	0.513279	3.36404	0.000768113	0.020439
ENSG00000135046	ANXA1	77236.7	1.7259	0.646683	2.66885	0.00761123	0.0849626
ENSG00000212195	RF00012	38.6939	1.72342	0.525553	3.27926	0.00104081	0.0245732
ENSG00000263264	AC119396.1	395.532	-1.72235	0.565123	-3.04774	0.00230567	0.0411892
ENSG00000121210	TMEM131L	3013.86	-1.72216	0.491084	-3.50684	0.000453457	0.0145574
ENSG00000108839	ALOX12	388.55	-1.72118	0.51293	-3.35559	0.00079196	0.0207684
ENSG00000003436	TFPI	10414.8	1.71909	0.537031	3.2011	0.00136902	0.0294331
ENSG00000078399	HOXA9	3320.88	1.71817	0.350464	4.90254	9.46e-07	0.000220647
ENSG00000223522	AC093690.1	59.8078	-1.71151	0.588511	-2.9082	0.00363517	0.0534625
ENSG00000125657	TNFSF9	384.31	1.71058	0.574786	2.97602	0.00292015	0.047114
ENSG00000106133	NSUN5P2	47.0864	-1.71008	0.476141	-3.59154	0.000328729	0.0120771
ENSG00000242295	AC087477.1	7.56145	1.71006	0.631687	2.70713	0.00678675	0.0795941
ENSG00000213315	AL122020.1	182.841	1.70903	0.475529	3.59396	0.000325686	0.0120083
ENSG00000239653	PSMD6-AS2	415.829	-1.70805	0.609672	-2.80158	0.00508525	0.0660691
ENSG00000214389	RPS3AP26	5770.8	1.70222	0.487406	3.49241	0.000478677	0.0150568
ENSG00000236813	BTF3P8	19.2499	1.70186	0.415832	4.09267	4.26e-05	0.00322904
ENSG00000117298	ECE1	2568.49	-1.69984	0.564116	-3.01327	0.00258445	0.0439711
ENSG00000244723	ASLP1	15.9336	-1.69958	0.641333	-2.65007	0.00804743	0.0878569
ENSG00000137101	CD72	687.135	-1.69822	0.619462	-2.74145	0.0061169	0.0744006
ENSG00000111788	AC009533.1	613.636	-1.69676	0.396937	-4.27464	1.91e-05	0.00188307
ENSG00000146021	KLHL3	243.536	-1.69582	0.621896	-2.72685	0.00639423	0.0767633
ENSG00000115828	QPCT	1526.49	-1.69569	0.629565	-2.69344	0.00707192	0.0818924
ENSG00000118496	FBXO30	1077.96	1.69471	0.373884	4.53272	5.82e-06	0.000818595
ENSG00000115525	ST3GAL5	385.056	-1.69193	0.560765	-3.01719	0.00255132	0.04365
ENSG00000172746	RPL12P13	14.7899	1.69145	0.408424	4.1414	3.45e-05	0.00284157
ENSG00000231414	AC016700.2	637.68	1.6891	0.454563	3.71588	0.000202497	0.00900335
ENSG00000205238	SPDYE2	138.544	-1.68809	0.423275	-3.98817	6.66e-05	0.0043028
ENSG00000231871	IPO9-AS1	12.1412	-1.68538	0.503433	-3.34778	0.00081461	0.0210706
ENSG00000271360	AL512631.2	62.9382	-1.68514	0.553729	-3.04325	0.0023404	0.0414103
ENSG00000242100	RPL9P32	301.813	1.68285	0.405595	4.1491	3.34e-05	0.00277731
ENSG00000214286	PDCL3P3	5.83498	1.68273	0.647596	2.59843	0.00936516	0.0962046
ENSG00000237793	RPL18AP16	9.3005	1.67908	0.43119	3.89405	9.86e-05	0.00570982
ENSG00000100490	CDKL1	63.1803	-1.67875	0.520239	-3.22687	0.00125151	0.0279813
ENSG00000078596	ITM2A	17200.2	1.67774	0.471579	3.55771	0.000374107	0.0130438
ENSG00000214826	DDX12P	709.826	-1.67686	0.382853	-4.37991	1.19e-05	0.00136082
ENSG00000145425	RPS3A	39336.5	1.67617	0.491316	3.41159	0.000645859	0.0182724
ENSG00000241352	AC007688.1	511.353	1.67493	0.431707	3.87978	0.000104551	0.00596162
ENSG00000142910	TINAGL1	512.497	-1.67488	0.565574	-2.96138	0.00306262	0.0481804
ENSG00000240392	RPL9P3	310.804	1.67386	0.413787	4.04521	5.23e-05	0.00362095
ENSG00000145217	SLC26A1	123.421	-1.6737	0.418988	-3.99463	6.48e-05	0.00424431
ENSG00000276393	AC105429.2	9.75366	-1.67279	0.636614	-2.62763	0.00859813	0.0914372
ENSG00000133731	IMPA1	2529.05	1.66727	0.32122	5.19043	2.1e-07	7.6e-05
ENSG00000271268	AC015849.6	134.56	1.66705	0.461442	3.6127	0.000303026	0.0115069
ENSG00000114626	ABTB1	4464.81	-1.66441	0.390643	-4.26069	2.04e-05	0.00194856
ENSG00000244289	RPS3AP35	33.6867	1.66404	0.555094	2.99776	0.0027197	0.0453415
ENSG00000023608	SNAPC1	601.649	1.66404	0.308306	5.39735	6.76e-08	3.2e-05
ENSG00000248643	RBM14-RBM4	30.1985	-1.66088	0.478129	-3.4737	0.000513331	0.0157097
ENSG00000179583	CIITA	5424.85	-1.65917	0.590773	-2.80848	0.00497764	0.0653504
ENSG00000091592	NLRP1	4229.71	-1.65906	0.446962	-3.71185	0.000205751	0.00907513
ENSG00000240622	RPL7P15	78.2441	1.65513	0.358664	4.61471	3.94e-06	0.000640622
ENSG00000231500	RPS18	91676.5	1.6521	0.468082	3.5295	0.000416343	0.0139174
ENSG00000197879	MYO1C	725.611	-1.64505	0.600942	-2.73746	0.00619159	0.0750475
ENSG00000229917	RPL7P46	17.8922	-1.64349	0.533122	-3.08277	0.00205083	0.0380697
ENSG00000147119	CHST7	497.975	-1.64209	0.635936	-2.58216	0.00981833	0.0990314
ENSG00000235795	AC093157.2	20.933	1.63966	0.483059	3.39432	0.000687993	0.0188983
ENSG00000229502	AL391863.1	66.0807	-1.63832	0.561695	-2.91674	0.00353714	0.0525823
ENSG00000007237	GAS7	1427.33	-1.63601	0.551933	-2.96414	0.00303531	0.0481336
ENSG00000213051	RPL5P5	46.6162	1.6355	0.478324	3.41923	0.000627978	0.0179847
ENSG00000167981	ZNF597	386.852	1.6333	0.459571	3.55396	0.000379476	0.0131713
ENSG00000135185	TMEM243	1924.14	-1.6319	0.482589	-3.38155	0.000720771	0.019551
ENSG00000088451	TGDS	934.088	1.63165	0.454639	3.5889	0.000332076	0.0121315
ENSG00000242299	AC073861.1	4853.82	1.63143	0.459164	3.55304	0.000380801	0.0131755
ENSG00000241458	RPL7P19	133.224	1.63111	0.355254	4.5914	4.4e-06	0.000695115
ENSG00000266074	BAHCC1	1894.52	-1.63049	0.516937	-3.15413	0.00160979	0.0323478
ENSG00000172780	RAB43	102.358	-1.62996	0.521085	-3.12802	0.00175987	0.0342735
ENSG00000126705	AHDC1	590.431	-1.62969	0.429215	-3.7969	0.000146517	0.00738183
ENSG00000236330	RPL5P9	71.411	1.62734	0.374863	4.34115	1.42e-05	0.00151519
ENSG00000251666	ZNF346-IT1	23.1598	-1.62481	0.587942	-2.76355	0.00571758	0.0710934
ENSG00000196689	TRPV1	69.949	-1.62142	0.622221	-2.60586	0.00916444	0.0950879
ENSG00000217239	AL136968.2	139.593	1.61976	0.429388	3.77224	0.000161786	0.00791875
ENSG00000183458	AC138932.1	623.401	-1.61921	0.400305	-4.04493	5.23e-05	0.00362095
ENSG00000217643	PTGES3P2	48.8784	1.61791	0.553362	2.92378	0.00345807	0.0518323
ENSG00000244251	AC013356.1	21.0978	1.61786	0.593351	2.72664	0.00639821	0.0767633
ENSG00000131477	RAMP2	108.902	-1.61174	0.583818	-2.76069	0.00576802	0.0715545
ENSG00000218596	AL162578.1	47.596	-1.61001	0.453732	-3.54838	0.000387616	0.013289
ENSG00000237513	AC007384.1	364.406	1.60962	0.591377	2.72182	0.00649239	0.0773859
ENSG00000075702	WDR62	1207.81	-1.60598	0.383947	-4.18281	2.88e-05	0.00248299
ENSG00000137812	KNL1	650.985	-1.60589	0.434613	-3.695	0.000219889	0.0094549
ENSG00000129204	USP6	93.9433	-1.6047	0.602944	-2.66144	0.00778074	0.0859511
ENSG00000183386	FHL3	3269.25	1.60228	0.397191	4.03403	5.48e-05	0.00375118
ENSG00000162616	DNAJB4	1213.15	1.60201	0.382764	4.18536	2.85e-05	0.00247544
ENSG00000101224	CDC25B	847.019	-1.59919	0.536096	-2.98302	0.0028542	0.0465425
ENSG00000152193	RNF219	685.998	1.5991	0.514217	3.10977	0.00187235	0.0357371
ENSG00000171643	S100Z	613.389	1.59711	0.499598	3.19679	0.00138966	0.0296284
ENSG00000184844	CYCSP45	25.4948	1.59703	0.404118	3.95188	7.75e-05	0.00480222
ENSG00000101400	SNTA1	538.676	-1.59592	0.565032	-2.82448	0.0047357	0.0632515
ENSG00000272476	AL024507.2	67.5882	-1.59382	0.537747	-2.96388	0.00303785	0.0481336
ENSG00000152133	GPATCH11	1990.42	1.59352	0.38893	4.09719	4.18e-05	0.00320122
ENSG00000271895	AL109811.3	69.7671	-1.59268	0.557208	-2.85833	0.00425876	0.0592688
ENSG00000076641	PAG1	4176.32	-1.58901	0.616701	-2.57663	0.0099768	0.100149
ENSG00000124780	KCNK17	1847.4	1.58876	0.570868	2.78306	0.00538487	0.0686192
ENSG00000244245	AC133134.1	199.478	1.58707	0.389369	4.07599	4.58e-05	0.00339906
ENSG00000276023	DUSP14	2079.86	1.58549	0.374962	4.22841	2.35e-05	0.00216651
ENSG00000225674	IPO7P2	6.91632	1.58474	0.61034	2.59649	0.00941828	0.0964822
ENSG00000162298	SYVN1	1850.62	-1.58428	0.385622	-4.10837	3.98e-05	0.0030745
ENSG00000152056	AP1S3	415.667	1.58368	0.552019	2.86888	0.00411925	0.0581207
ENSG00000265545	AP005403.1	23.4863	1.58258	0.489008	3.2363	0.00121089	0.0273914
ENSG00000225918	RPL7P59	42.7859	1.58074	0.397404	3.97767	6.96e-05	0.00446306
ENSG00000100099	HPS4	5810.74	-1.58055	0.294454	-5.36772	7.97e-08	3.61e-05
ENSG00000254681	PKD1P5	393.712	-1.57648	0.375016	-4.20377	2.63e-05	0.00233476
ENSG00000236533	AC009413.1	34.439	1.57599	0.441656	3.56836	0.000359222	0.0126248
ENSG00000256060	TRAPPC2B	575.204	1.57595	0.350062	4.50191	6.73e-06	0.000905398
ENSG00000283122	HYMAI	116.454	1.57513	0.551429	2.85644	0.00428416	0.0594256
ENSG00000171608	PIK3CD	8676.08	-1.57463	0.298001	-5.28399	1.26e-07	4.93e-05
ENSG00000231466	AL022324.2	154.859	-1.5744	0.520574	-3.02436	0.00249156	0.0429735
ENSG00000223803	RPS20P14	495.312	1.57436	0.364585	4.31822	1.57e-05	0.0016213
ENSG00000104626	ERI1	2788.19	1.57317	0.386035	4.0752	4.6e-05	0.0034024
ENSG00000198929	NOS1AP	51.8357	-1.57163	0.609729	-2.57758	0.00994944	0.0999392
ENSG00000104671	DCTN6	1770.18	1.57126	0.405039	3.8793	0.00010476	0.00596162
ENSG00000229503	AC092155.2	213.269	1.57089	0.398604	3.94098	8.12e-05	0.00494205
ENSG00000213309	RPL9P18	248.444	1.57063	0.416061	3.775	0.000160009	0.00784427
ENSG00000227525	RPL7P6	382.986	1.57018	0.274371	5.72283	1.05e-08	6.58e-06
ENSG00000263327	TAPT1-AS1	272.967	-1.56869	0.390937	-4.01265	6e-05	0.00402715
ENSG00000226287	TMEM191A	73.2135	-1.56653	0.582406	-2.68975	0.00715057	0.0821742
ENSG00000229927	RHEBP1	30.0078	1.56187	0.429806	3.63391	0.000279158	0.01099
ENSG00000179766	ATP8B5P	98.3661	1.56063	0.47678	3.27328	0.00106307	0.0249647
ENSG00000258469	CHMP4BP1	67.5519	-1.5592	0.518327	-3.00813	0.00262858	0.0444502
ENSG00000206828	RF00003	127.776	1.55744	0.544867	2.85839	0.00425803	0.0592688
ENSG00000214857	SEM1P1	10.3538	1.55697	0.537496	2.89671	0.00377098	0.0547628
ENSG00000230837	RPL31P2	25.4693	1.55569	0.47259	3.29185	0.000995304	0.0239581
ENSG00000180096	2022-09-01	1183.76	-1.55539	0.520337	-2.9892	0.00279706	0.0459515
ENSG00000238103	RPL9P7	309.336	1.55443	0.48771	3.18721	0.00143655	0.0301569
ENSG00000242692	RPS27AP1	75.6697	1.55187	0.356654	4.35119	1.35e-05	0.00146265
ENSG00000109458	GAB1	877.277	-1.55136	0.511947	-3.03031	0.00244303	0.0423261
ENSG00000168016	TRANK1	738.949	-1.55135	0.579334	-2.67782	0.00741025	0.0834421
ENSG00000184635	ZNF93	1518.18	1.54922	0.473942	3.26879	0.00108009	0.025216
ENSG00000197933	ZNF823	349.552	1.54826	0.509214	3.04048	0.002362	0.0416552
ENSG00000263829	SINHCAFP1	24.4877	1.54631	0.395211	3.91262	9.13e-05	0.00541601
ENSG00000185112	FAM43A	2514.5	-1.54609	0.574742	-2.69006	0.00714399	0.0821599
ENSG00000170903	MSANTD4	658.7	1.54327	0.465937	3.31217	0.000925741	0.0228458
ENSG00000162073	PAQR4	1044.06	-1.54163	0.356014	-4.33025	1.49e-05	0.00157576
ENSG00000213695	RPS7P14	50.4906	1.54057	0.504093	3.05612	0.00224224	0.0403931
ENSG00000165195	PIGA	2501.53	1.5399	0.443981	3.4684	0.000523568	0.0159122
ENSG00000196535	MYO18A	5205.26	-1.53727	0.455509	-3.37484	0.000738578	0.0199112
ENSG00000159314	ARHGAP27	5035.67	-1.53699	0.460703	-3.3362	0.000849334	0.0217025
ENSG00000237094	AL732372.2	33.1859	-1.53379	0.432498	-3.54636	0.000390592	0.0133169
ENSG00000135048	CEMIP2	1692.86	-1.53369	0.536699	-2.85763	0.00426814	0.0592986
ENSG00000185947	ZNF267	3318.24	1.5319	0.408354	3.75139	0.00017586	0.00833194
ENSG00000129353	SLC44A2	8296.62	-1.52639	0.416989	-3.6605	0.000251723	0.0102919
ENSG00000237550	RPL9P9	5602.33	1.52592	0.518815	2.94117	0.00326979	0.0500836
ENSG00000204176	SYT15	17.9019	-1.52526	0.569503	-2.67823	0.00740113	0.0834036
ENSG00000197279	ZNF165	457.91	1.52382	0.496012	3.07214	0.00212532	0.0388639
ENSG00000168116	KIAA1586	1806.16	1.52279	0.445736	3.41634	0.000634684	0.0180785
ENSG00000231006	RPL7P32	252.15	1.5225	0.287673	5.29249	1.21e-07	4.76e-05
ENSG00000241127	YAE1D1	371.823	1.52204	0.510585	2.98096	0.00287342	0.0467207
ENSG00000253669	GASAL1	364.93	1.52041	0.534196	2.84616	0.00442496	0.060413
ENSG00000116704	SLC35D1	1997.21	-1.51993	0.477154	-3.18541	0.0014455	0.0302369
ENSG00000184887	BTBD6	1403.67	-1.51902	0.474849	-3.19896	0.00137923	0.0295631
ENSG00000117425	PTCH2	146.61	-1.519	0.576743	-2.63376	0.0084445	0.0903967
ENSG00000261549	AC107954.1	104.113	1.51819	0.514873	2.94868	0.00319134	0.0491997
ENSG00000140853	NLRC5	3905.85	-1.51741	0.348859	-4.34964	1.36e-05	0.00146278
ENSG00000144791	LIMD1	1626.97	-1.51537	0.39085	-3.87712	0.0001057	0.00600402
ENSG00000053702	NRIP2	158.409	-1.51462	0.348207	-4.34977	1.36e-05	0.00146278
ENSG00000006451	RALA	5190.16	1.51432	0.322529	4.69513	2.66e-06	0.000497135
ENSG00000104343	UBE2W	1877.41	1.51269	0.292407	5.17322	2.3e-07	8.05e-05
ENSG00000218208	RPS27AP11	50.3	1.51215	0.401627	3.76507	0.000166502	0.00805991
ENSG00000159618	ADGRG5	2393.45	1.51035	0.579192	2.60768	0.0091157	0.0947805
ENSG00000133703	KRAS	3822.13	1.51005	0.43695	3.4559	0.000548464	0.016362
ENSG00000177410	ZFAS1	1802.72	1.50878	0.504575	2.99021	0.00278788	0.0458497
ENSG00000234031	RPS3AP44	76.208	1.50691	0.541488	2.78291	0.00538742	0.0686233
ENSG00000171130	ATP6V0E2	1569.47	-1.50622	0.442031	-3.4075	0.000655609	0.0184052
ENSG00000284981	AC093668.3	2.87753	-1.50417	0.572119	-2.62913	0.00856034	0.0911613
ENSG00000155428	TRIM74	69.5094	-1.50279	0.321763	-4.67048	3e-06	0.000523606
ENSG00000234797	RPS3AP6	2817.79	1.50209	0.49687	3.0231	0.00250199	0.0430543
ENSG00000213935	RPL22P16	22.4167	1.50172	0.418866	3.58521	0.000336813	0.0122155
ENSG00000140987	ZSCAN32	28.7977	1.50171	0.560545	2.67901	0.007384	0.0833557
ENSG00000223877	RPS8P10	41.7732	1.49954	0.351636	4.26447	2e-05	0.00193605
ENSG00000281087	AC135068.6	41.7732	1.49954	0.351636	4.26447	2e-05	0.00193605
ENSG00000149311	ATM	880.005	-1.49934	0.409362	-3.66262	0.000249644	0.0102889
ENSG00000137876	RSL24D1	20736.6	1.4977	0.445838	3.35929	0.00078143	0.0206541
ENSG00000032444	PNPLA6	1313.84	-1.49766	0.367006	-4.08076	4.49e-05	0.00334692
ENSG00000173209	AHSA2P	1913.16	-1.49747	0.480379	-3.11727	0.00182535	0.0351892
ENSG00000285091	AL109840.2	17.9416	1.49632	0.479164	3.12277	0.00179159	0.0347341
ENSG00000240509	RPL34P18	1349.76	1.49413	0.428701	3.48526	0.00049166	0.0153206
ENSG00000228335	AC073063.1	8.94147	1.49412	0.562628	2.65562	0.00791635	0.087012
ENSG00000141503	MINK1	1671.95	-1.49386	0.420292	-3.55434	0.000378925	0.013167
ENSG00000214812	AL137792.1	16.9614	1.49365	0.456492	3.27202	0.00106783	0.0250384
ENSG00000083454	P2RX5	275.875	-1.49314	0.555839	-2.68629	0.00722512	0.0825073
ENSG00000101412	E2F1	4101.43	-1.49207	0.467099	-3.19432	0.0014016	0.0297594
ENSG00000176834	VSIG10	677.413	-1.49094	0.392092	-3.80253	0.000143226	0.00730049
ENSG00000234290	AC116366.1	409.71	-1.48615	0.508049	-2.92521	0.00344223	0.0516704
ENSG00000213741	RPS29	10219.3	1.48554	0.429499	3.45877	0.000542658	0.0162526
ENSG00000235045	RPL7P8	128.101	1.48483	0.304057	4.8834	1.04e-06	0.0002378
ENSG00000176024	ZNF613	398.966	1.48459	0.555529	2.67239	0.00753138	0.0842852
ENSG00000198771	RCSD1	10939.7	-1.4845	0.348403	-4.26087	2.04e-05	0.00194856
ENSG00000232176	AL161909.1	2146.53	1.48339	0.435255	3.4081	0.00065417	0.0183926
ENSG00000228071	RPL7P47	203.714	1.48255	0.310109	4.78076	1.75e-06	0.000361721
ENSG00000119684	MLH3	761.364	-1.48118	0.490602	-3.01911	0.00253515	0.0434333
ENSG00000126790	L3HYPDH	494.684	-1.48029	0.303832	-4.87207	1.1e-06	0.000246378
ENSG00000230980	RPL36AP39	7.22003	1.47941	0.573182	2.58105	0.00985007	0.0992152
ENSG00000198918	RPL39	10600.3	1.47927	0.443652	3.33431	0.00085511	0.0218113
ENSG00000234718	AC007161.1	17.5883	1.47634	0.321805	4.58767	4.48e-06	0.00069903
ENSG00000163131	CTSS	11543.3	-1.47398	0.462757	-3.18521	0.00144649	0.0302369
ENSG00000163281	GNPDA2	1574.43	1.47339	0.374195	3.93749	8.23e-05	0.00498617
ENSG00000165046	LETM2	457.087	1.47129	0.406569	3.61879	0.000295983	0.0113511
ENSG00000241282	RPL34P33	178.709	1.47103	0.428533	3.43272	0.000597568	0.0174382
ENSG00000250746	AC105250.1	494.29	1.47016	0.398661	3.68775	0.000226245	0.00963401
ENSG00000283268	TEX54	20.9357	1.46829	0.516594	2.84226	0.00447955	0.0608077
ENSG00000179532	DNHD1	430.118	-1.46825	0.404256	-3.63198	0.000281259	0.0110167
ENSG00000164162	ANAPC10	1515.7	1.46807	0.374863	3.91628	8.99e-05	0.0053653
ENSG00000101057	MYBL2	11149.4	-1.46778	0.536789	-2.73437	0.00625007	0.0755198
ENSG00000187627	RGPD1	34.4249	-1.46704	0.524524	-2.79689	0.00515966	0.0665761
ENSG00000227638	HNRNPA1P14	20.6903	-1.46688	0.537683	-2.72815	0.00636897	0.0765346
ENSG00000220744	RPL5P18	36.408	1.46318	0.463008	3.16016	0.00157683	0.0318542
ENSG00000167904	TMEM68	1601.99	1.46286	0.393417	3.71835	0.000200525	0.00896666
ENSG00000061938	TNK2	1201.88	-1.46264	0.319626	-4.5761	4.74e-06	0.000725612
ENSG00000230747	AC021188.1	207.934	-1.46251	0.496974	-2.94284	0.0032522	0.0499379
ENSG00000245849	RAD51-AS1	417.566	-1.46186	0.433319	-3.37364	0.000741824	0.0199448
ENSG00000236312	RPL34P34	495.557	1.45894	0.434581	3.35711	0.000787611	0.0207426
ENSG00000163682	RPL9	34164.6	1.4559	0.439964	3.30912	0.000935883	0.0229769
ENSG00000235174	RPL39P3	325.958	1.45188	0.467508	3.10558	0.00189907	0.0360017
ENSG00000197774	EME2	406.105	-1.45185	0.296063	-4.90387	9.4e-07	0.000220647
ENSG00000229752	RPL7P10	27.6096	1.45167	0.395888	3.66686	0.000245547	0.0101585
ENSG00000161888	SPC24	468.476	-1.45113	0.490647	-2.95758	0.00310063	0.0483699
ENSG00000223705	NSUN5P1	751.916	-1.45068	0.429955	-3.37402	0.000740786	0.0199448
ENSG00000166669	ATF7IP2	6500.58	1.45021	0.537883	2.69614	0.00701485	0.0815274
ENSG00000228401	AL590226.1	325.043	1.4496	0.416729	3.47851	0.000504216	0.0155544
ENSG00000243859	RPL5P17	95.9601	1.44869	0.398547	3.63493	0.000278053	0.0109608
ENSG00000240634	AC145285.1	24.5757	1.44809	0.489888	2.95597	0.0031169	0.0485382
ENSG00000218426	AL590867.2	3253.67	1.44778	0.475172	3.04686	0.00231248	0.0411892
ENSG00000188512	AF279873.1	96.0115	1.44658	0.330887	4.37183	1.23e-05	0.00139612
ENSG00000244363	RPL7P23	1141.96	1.44444	0.304365	4.74575	2.08e-06	0.000412625
ENSG00000215304	AC135983.1	12.68	1.44426	0.48611	2.97106	0.00296771	0.0476366
ENSG00000131018	SYNE1	1525.27	-1.44177	0.384396	-3.75075	0.000176304	0.00833194
ENSG00000228007	AC011933.1	206.789	1.43804	0.307951	4.66972	3.02e-06	0.000523606
ENSG00000277462	ZNF670	534.898	1.43655	0.517683	2.77496	0.00552089	0.0695435
ENSG00000239797	RPL21P39	161.575	1.43617	0.383723	3.74273	0.000182035	0.00849139
ENSG00000115306	SPTBN1	10084.6	-1.43534	0.433367	-3.31207	0.000926091	0.0228458
ENSG00000008988	RPS20	22472.6	1.43458	0.349949	4.09941	4.14e-05	0.00318011
ENSG00000171858	RPS21	8455.02	1.4335	0.485996	2.94962	0.0031817	0.049124
ENSG00000197536	C5orf56	581.391	-1.43323	0.435454	-3.29135	0.000997095	0.0239825
ENSG00000269044	AC024075.2	65.5318	-1.43148	0.476152	-3.00635	0.00264406	0.0446042
ENSG00000126860	EVI2A	604.691	1.43083	0.48909	2.92549	0.00343917	0.0516497
ENSG00000243779	AP001086.1	23.7569	1.43004	0.442847	3.2292	0.00124136	0.0278527
ENSG00000162645	GBP2	3627.49	1.42965	0.470721	3.03715	0.00238825	0.0418633
ENSG00000211899	IGHM	50142.8	-1.42741	0.544263	-2.62264	0.00872513	0.0922596
ENSG00000234289	H2BFS	100.528	1.42698	0.535148	2.66652	0.00766415	0.0852135
ENSG00000133392	MYH11	188.587	-1.42601	0.482122	-2.95778	0.00309858	0.0483699
ENSG00000212123	PRR22	105.46	-1.42522	0.508213	-2.80438	0.00504129	0.0657654
ENSG00000134594	RAB33A	787.533	1.4252	0.494756	2.8806	0.00396916	0.056652
ENSG00000250575	AL732372.3	4.60956	-1.42451	0.550827	-2.58613	0.00970612	0.0982751
ENSG00000160211	G6PD	696.188	-1.42348	0.342418	-4.15713	3.22e-05	0.00270429
ENSG00000174151	CYB561D1	523.713	-1.42248	0.423141	-3.36171	0.000774615	0.020562
ENSG00000241680	RPL31P49	25.321	1.42238	0.408282	3.48383	0.000494299	0.0153783
ENSG00000213864	EEF1B2P2	102.393	1.42209	0.3816	3.72666	0.000194036	0.0088458
ENSG00000242660	AC015911.1	241.55	1.41702	0.457055	3.10034	0.001933	0.0364652
ENSG00000141858	SAMD1	1964.41	-1.41555	0.415771	-3.40464	0.000662507	0.0184585
ENSG00000109475	RPL34	25127.8	1.41474	0.421281	3.3582	0.000784516	0.0206789
ENSG00000225419	RPL21P3	63.4758	1.41275	0.421401	3.35251	0.000800809	0.0208594
ENSG00000173727	AP000769.1	87.8722	1.4124	0.445078	3.17339	0.00150672	0.0309663
ENSG00000107902	LHPP	1147.89	-1.41231	0.362974	-3.89095	9.99e-05	0.00575697
ENSG00000092096	SLC22A17	620.7	-1.41148	0.515323	-2.73902	0.00616223	0.0748029
ENSG00000268204	AC008763.1	49.8668	-1.40966	0.541637	-2.60259	0.00925212	0.0954894
ENSG00000180667	YOD1	1414.91	-1.40731	0.505017	-2.78666	0.00532548	0.0680313
ENSG00000162148	PPP1R32	152.609	-1.40712	0.418684	-3.36082	0.000777124	0.0205898
ENSG00000219928	AL161787.1	172.758	1.40389	0.462081	3.03818	0.00238013	0.0418009
ENSG00000258204	AC008126.1	21.3858	1.40268	0.486506	2.88318	0.00393685	0.0562954
ENSG00000113108	APBB3	552.609	-1.40161	0.518412	-2.70367	0.00685784	0.0802479
ENSG00000227827	AC138969.2	188.248	-1.4016	0.439733	-3.18739	0.00143563	0.0301569
ENSG00000064687	ABCA7	1448.97	-1.40087	0.387772	-3.61262	0.000303118	0.0115069
ENSG00000236735	RPL31P63	163.17	1.40071	0.404511	3.46272	0.000534754	0.0161357
ENSG00000138735	PDE5A	226.217	-1.39995	0.433939	-3.22615	0.00125468	0.0280115
ENSG00000169246	NPIPB3	261.507	-1.39943	0.41896	-3.34026	0.000837007	0.0214741
ENSG00000116852	KIF21B	554.329	-1.39814	0.410046	-3.40971	0.000650315	0.0183345
ENSG00000250251	PKD1P6	1072.01	-1.39603	0.418923	-3.33243	0.000860919	0.021887
ENSG00000242667	AC087385.2	33.345	1.3956	0.487729	2.86142	0.00421753	0.0589019
ENSG00000184612	RPL7P26	301.767	1.39507	0.304029	4.5886	4.46e-06	0.00069903
ENSG00000217181	AL139039.2	130.129	1.3941	0.382468	3.64501	0.00026738	0.0106924
ENSG00000197324	LRP10	5439.45	-1.39407	0.439523	-3.17178	0.0015151	0.0310618
ENSG00000005206	SPPL2B	4664.69	-1.39404	0.278943	-4.99759	5.81e-07	0.00015739
ENSG00000180479	ZNF571	425.124	1.39383	0.385859	3.61228	0.000303514	0.0115078
ENSG00000279225	AC138305.3	16.4505	1.39364	0.460483	3.02648	0.00247415	0.0426972
ENSG00000243716	NPIPB5	578.517	-1.39363	0.442448	-3.14981	0.00163374	0.0326822
ENSG00000174928	C3orf33	92.7095	1.39305	0.483987	2.87828	0.00399845	0.0569119
ENSG00000214655	ZSWIM8	1759.98	-1.3926	0.33273	-4.18537	2.85e-05	0.00247544
ENSG00000164751	PEX2	3768.09	1.39237	0.367448	3.78931	0.000151067	0.00753794
ENSG00000101901	ALG13	3115.03	1.3918	0.437637	3.18027	0.0014714	0.0305256
ENSG00000253785	AC008429.2	116.52	1.39001	0.346536	4.01117	6.04e-05	0.00403502
ENSG00000244582	RPL21P120	403.799	1.38943	0.380492	3.65167	0.000260539	0.0104757
ENSG00000172071	EIF2AK3	2095.44	-1.38906	0.474489	-2.92748	0.00341722	0.0515211
ENSG00000083937	CHMP2B	6608.14	1.38827	0.391393	3.54701	0.000389627	0.0133116
ENSG00000234009	RPL5P34	768.233	1.38531	0.36272	3.81924	0.000133866	0.00691497
ENSG00000106479	ZNF862	306.512	-1.38421	0.529636	-2.61351	0.00896179	0.0938777
ENSG00000133401	PDZD2	323.368	-1.38381	0.506129	-2.7341	0.00625509	0.0755198
ENSG00000266028	SRGAP2	931.884	-1.38254	0.378616	-3.65157	0.000260643	0.0104757
ENSG00000249617	AC106872.7	56.015	1.38218	0.442933	3.12051	0.00180536	0.0349278
ENSG00000229994	RPL5P4	312.031	1.38186	0.345536	3.99918	6.36e-05	0.00419043
ENSG00000077585	GPR137B	582.373	-1.38167	0.518148	-2.66656	0.00766322	0.0852135
ENSG00000241464	RPL39P38	97.8095	1.38127	0.438785	3.14795	0.00164418	0.0328271
ENSG00000276180	HIST1H4I	841.397	1.38059	0.46144	2.99191	0.00277237	0.0456676
ENSG00000230832	AC241584.1	112.342	1.37988	0.403108	3.4231	0.000619123	0.0178175
ENSG00000227682	ATP5F1AP2	6.99892	1.37957	0.459499	3.00234	0.00267915	0.0449744
ENSG00000065911	MTHFD2	2607.89	1.37769	0.406055	3.39287	0.000691637	0.0189443
ENSG00000182888	AC007685.1	10.0188	1.37762	0.485757	2.83602	0.00456801	0.0615742
ENSG00000146067	FAM193B	3320.21	-1.37634	0.427191	-3.22185	0.00127366	0.0282544
ENSG00000105708	ZNF14	1252.16	1.3762	0.478603	2.87545	0.00403456	0.0573462
ENSG00000213598	AL049873.1	786.291	1.37386	0.378149	3.63313	0.00028	0.0109954
ENSG00000100280	AP1B1	7982.03	-1.37218	0.326475	-4.20302	2.63e-05	0.00233476
ENSG00000122223	CD244	3018.59	1.37196	0.437279	3.1375	0.00170394	0.0335847
ENSG00000183281	PLGLB1	14.5954	-1.37144	0.476999	-2.87515	0.00403842	0.0573746
ENSG00000100241	SBF1	4723.67	-1.37057	0.31263	-4.384	1.17e-05	0.00134858
ENSG00000233057	EEF1A1P14	25.8483	1.36938	0.460757	2.97201	0.00295854	0.0475141
ENSG00000176018	LYSMD3	2465.15	1.36923	0.303256	4.51509	6.33e-06	0.00086986
ENSG00000136040	PLXNC1	2421.89	-1.36889	0.320865	-4.26625	1.99e-05	0.00193605
ENSG00000060303	RPS17P5	16.154	1.3683	0.512816	2.66821	0.00762565	0.0850311
ENSG00000214460	TPT1P6	63.9171	1.36748	0.455876	2.99967	0.00270276	0.0451983
ENSG00000166441	RPL27A	40250	1.36739	0.459836	2.97365	0.0029428	0.0473873
ENSG00000107443	CCNJ	1058.75	1.36661	0.296694	4.60612	4.1e-06	0.000661291
ENSG00000184677	ZBTB40	661.577	-1.36605	0.409319	-3.33737	0.00084574	0.0216621
ENSG00000242276	RPL5P3	131.674	1.36431	0.356345	3.82864	0.000128856	0.00673529
ENSG00000217261	POM121L4P	7.94812	-1.36276	0.510096	-2.67158	0.00754954	0.084427
ENSG00000234093	RPS15AP11	72.0482	1.36265	0.412674	3.302	0.000959994	0.0233639
ENSG00000154920	EME1	239.273	-1.36126	0.52647	-2.58564	0.00971985	0.0983711
ENSG00000159214	CCDC24	235.635	-1.36124	0.477863	-2.8486	0.00439122	0.0601658
ENSG00000137154	RPS6	123080	1.3609	0.434016	3.13561	0.00171498	0.0337591
ENSG00000185015	CA13	318.495	1.36056	0.491471	2.76834	0.00563435	0.0705428
ENSG00000176809	LRRC37A3	208.963	-1.35993	0.412551	-3.2964	0.000979314	0.0237216
ENSG00000229765	AL354868.1	147.287	1.35912	0.38074	3.56968	0.000357424	0.0126193
ENSG00000213942	AC005840.1	23.5084	1.35839	0.520596	2.60929	0.00907293	0.0946234
ENSG00000205746	AC126755.1	615.784	-1.35792	0.409649	-3.31484	0.000916962	0.0227327
ENSG00000185291	IL3RA	2433.07	1.35637	0.506418	2.67836	0.00739834	0.0834036
ENSG00000243181	AC087343.1	266.168	1.35474	0.369472	3.66669	0.00024571	0.0101585
ENSG00000165997	ARL5B	3162.31	1.35454	0.451625	2.99927	0.00270631	0.0452326
ENSG00000266714	MYO15B	2646.25	-1.35383	0.452615	-2.99112	0.00277954	0.0457368
ENSG00000241061	RPL5P1	918.886	1.35329	0.377234	3.5874	0.000333993	0.0121586
ENSG00000214925	AC234778.1	15.9331	1.3532	0.419077	3.22899	0.00124229	0.0278527
ENSG00000234618	RPSAP9	206.095	1.35234	0.297155	4.55097	5.34e-06	0.000771825
ENSG00000161996	WDR90	1569.35	-1.3513	0.391298	-3.45337	0.000553624	0.0164681
ENSG00000155304	HSPA13	4996	1.35071	0.252512	5.34907	8.84e-08	3.78e-05
ENSG00000224892	RPS4XP16	131.502	1.35061	0.324188	4.16611	3.1e-05	0.00263505
ENSG00000213347	MXD3	1411.19	-1.35001	0.414891	-3.25389	0.00113838	0.0260961
ENSG00000213087	AL356535.1	47.0749	1.34829	0.39086	3.44956	0.00056151	0.0166222
ENSG00000060558	GNA15	44445.7	1.34696	0.495533	2.7182	0.00656372	0.0778417
ENSG00000198286	CARD11	817.182	-1.34641	0.455523	-2.95574	0.00311918	0.0485492
ENSG00000259704	AC124248.1	177.241	1.34601	0.398776	3.37535	0.000737207	0.0199091
ENSG00000239559	RPL37P2	206.241	1.34459	0.306418	4.38808	1.14e-05	0.00132853
ENSG00000203875	SNHG5	6733.86	1.34367	0.423641	3.17172	0.00151539	0.0310618
ENSG00000273363	AL353801.3	10.766	-1.34335	0.43209	-3.10896	0.0018775	0.035791
ENSG00000229605	RPL21P93	249.994	1.34308	0.385539	3.48364	0.00049464	0.0153783
ENSG00000168071	CCDC88B	2971.92	-1.34216	0.511928	-2.62177	0.00874743	0.0923246
ENSG00000224117	PTPN2P2	10.038	1.34087	0.498016	2.69242	0.00709346	0.0818924
ENSG00000231409	AC018868.1	117.052	1.33653	0.286102	4.67151	2.99e-06	0.000523606
ENSG00000069188	SDK2	1117.18	-1.33478	0.462372	-2.88681	0.00389168	0.055883
ENSG00000090975	PITPNM2	819.909	-1.33357	0.497907	-2.67835	0.00739866	0.0834036
ENSG00000225787	LSM3P3	16.2419	1.3334	0.394823	3.37722	0.000732225	0.0197919
ENSG00000220749	RPL21P28	2230.77	1.33226	0.37263	3.57529	0.00034984	0.0124269
ENSG00000215093	EEF1A1P29	71.3161	1.33165	0.381642	3.48926	0.000484367	0.0151547
ENSG00000171295	ZNF440	906.678	1.3309	0.37894	3.51218	0.000444455	0.0144165
ENSG00000077097	TOP2B	15113.7	-1.33066	0.405622	-3.28055	0.00103606	0.0245495
ENSG00000179456	ZBTB18	411.653	-1.33004	0.441875	-3.01	0.00261247	0.0443141
ENSG00000071082	RPL31	33610.6	1.32882	0.37665	3.528	0.000418715	0.0139756
ENSG00000219747	AL133260.1	300.751	1.32827	0.447822	2.96607	0.00301628	0.0480411
ENSG00000104549	SQLE	2769.34	1.32797	0.459282	2.8914	0.00383528	0.0554872
ENSG00000180900	SCRIB	1348.39	-1.32797	0.381652	-3.47953	0.000502293	0.0155106
ENSG00000279483	AC090498.1	159.529	1.32727	0.357162	3.71615	0.000202285	0.00900335
ENSG00000198898	CAPZA2	23818	1.32658	0.435826	3.04382	0.00233592	0.0413977
ENSG00000214485	RPL7P1	2297.5	1.32632	0.299581	4.42726	9.54e-06	0.00116137
ENSG00000168283	BMI1	4400.3	1.32621	0.418704	3.16742	0.00153798	0.031321
ENSG00000277998	AC107075.1	133.182	1.32612	0.346477	3.82745	0.00012948	0.00674502
ENSG00000105136	ZNF419	555.859	1.32381	0.264924	4.99694	5.82e-07	0.00015739
ENSG00000232228	AC092431.2	55.3346	1.32252	0.370597	3.56862	0.000358863	0.0126248
ENSG00000121064	SCPEP1	2701.91	-1.32232	0.488422	-2.70732	0.00678282	0.0795941
ENSG00000147679	UTP23	1646.5	1.32174	0.303034	4.36171	1.29e-05	0.00142917
ENSG00000243824	RPL12P6	179.017	1.32169	0.377473	3.50141	0.000462808	0.0147195
ENSG00000232533	AC093673.1	1644	1.3209	0.450101	2.93467	0.00333898	0.0508035
ENSG00000242088	AC090602.1	97.0581	1.32036	0.399827	3.30233	0.000958852	0.0233546
ENSG00000205707	ETFRF1	1987.6	1.3198	0.32522	4.05817	4.95e-05	0.00350842
ENSG00000227311	AL031985.2	70.8401	1.31843	0.387578	3.40172	0.000669622	0.0185393
ENSG00000155189	AGPAT5	5718.87	1.31823	0.502909	2.62121	0.0087617	0.0923948
ENSG00000243071	AC107032.1	295.923	1.31772	0.365278	3.60745	0.00030922	0.0116666
ENSG00000135596	MICAL1	4391	-1.31652	0.491286	-2.67973	0.00736805	0.0833359
ENSG00000175463	TBC1D10C	7396.85	-1.31391	0.354465	-3.70673	0.00020995	0.00915543
ENSG00000182108	DEXI	155.189	-1.31142	0.361056	-3.63219	0.000281028	0.0110167
ENSG00000232393	RPL5P6	30.2424	1.30883	0.487993	2.68206	0.00731701	0.0830025
ENSG00000177084	POLE	2594.98	-1.30803	0.434779	-3.0085	0.00262543	0.0444361
ENSG00000164823	OSGIN2	4655.74	1.30762	0.36669	3.566	0.000362469	0.01271
ENSG00000103227	LMF1	1101.51	-1.30656	0.356155	-3.66851	0.000243971	0.0101365
ENSG00000269893	SNHG8	2528.76	1.30648	0.381439	3.42514	0.00061448	0.0177859
ENSG00000147604	RPL7	76601.9	1.30643	0.295374	4.42295	9.74e-06	0.00117088
ENSG00000213253	RPL12P42	210.915	1.30568	0.337613	3.8674	0.000110001	0.00613515
ENSG00000220472	AL139095.2	1240.61	1.30515	0.387283	3.37003	0.0007516	0.0200864
ENSG00000235750	KIAA0040	1768.43	-1.30342	0.479209	-2.71994	0.00652931	0.0776131
ENSG00000080947	CROCCP3	151.21	-1.3013	0.368461	-3.53171	0.000412886	0.0138319
ENSG00000136770	DNAJC1	4817.04	1.3012	0.371537	3.50221	0.000461423	0.0146906
ENSG00000233825	AL391839.2	93.8979	-1.30045	0.419674	-3.09871	0.00194364	0.036621
ENSG00000173678	SPDYE2B	44.5339	-1.3004	0.486786	-2.6714	0.0075536	0.0844418
ENSG00000198093	ZNF649	836.026	1.29975	0.438099	2.9668	0.0030092	0.0480037
ENSG00000139146	SINHCAF	9612.2	1.29867	0.338107	3.841	0.000122536	0.00652686
ENSG00000119523	ALG2	3755.18	1.29495	0.252568	5.12712	2.94e-07	9.74e-05
ENSG00000105519	CAPS	277.289	-1.29481	0.475038	-2.7257	0.00641662	0.0767959
ENSG00000225416	AC104843.1	147.407	1.29462	0.301397	4.29539	1.74e-05	0.00174711
ENSG00000141258	SGSM2	2543.75	-1.29247	0.246281	-5.24793	1.54e-07	5.72e-05
ENSG00000198795	ZNF521	4385.48	1.29229	0.492668	2.62304	0.00871479	0.0922309
ENSG00000156469	MTERF3	1230.88	1.29223	0.484556	2.66684	0.00765679	0.0852135
ENSG00000260101	AC008074.3	121.247	1.28911	0.363769	3.54375	0.000394484	0.0133903
ENSG00000241429	EEF1A1P25	303.238	1.28777	0.360275	3.57442	0.000351011	0.01245
ENSG00000146830	GIGYF1	973.441	-1.28667	0.467158	-2.75424	0.00588288	0.0723484
ENSG00000215003	RPL15P20	49.4345	1.28611	0.363978	3.53349	0.000410109	0.013781
ENSG00000213261	EEF1B2P6	274.143	1.28509	0.362527	3.54481	0.00039289	0.0133634
ENSG00000255444	CYCSP27	37.1821	1.28429	0.409827	3.13373	0.00172598	0.0339196
ENSG00000143515	ATP8B2	1703	-1.28401	0.452342	-2.83859	0.00453131	0.0613751
ENSG00000125503	PPP1R12C	1075.53	-1.28312	0.336457	-3.81361	0.000136951	0.00704675
ENSG00000100979	PLTP	6757.14	-1.28141	0.478441	-2.6783	0.00739967	0.0834036
ENSG00000069493	CLEC2D	580.633	-1.28069	0.393061	-3.25825	0.00112103	0.0258332
ENSG00000197857	ZNF44	1421.07	1.28064	0.317938	4.02794	5.63e-05	0.00382413
ENSG00000142556	ZNF614	1363.73	1.28018	0.362047	3.53594	0.000406319	0.0137014
ENSG00000183426	NPIPA1	177.758	-1.28016	0.446317	-2.86827	0.0041272	0.0581796
ENSG00000090924	PLEKHG2	1099.87	-1.27989	0.45027	-2.8425	0.00447618	0.0607888
ENSG00000227615	AP001324.1	1214.18	1.27977	0.375711	3.40627	0.000658564	0.0184355
ENSG00000198189	HSD17B11	7243.12	1.27946	0.321643	3.97789	6.95e-05	0.00446306
ENSG00000153130	SCOC	3783.05	1.27888	0.331035	3.86328	0.000111876	0.00621721
ENSG00000239470	AC011979.1	120.637	1.27745	0.411183	3.10678	0.00189138	0.035929
ENSG00000099204	ABLIM1	3793.02	-1.27735	0.431207	-2.96227	0.0030538	0.0481336
ENSG00000284976	BX255925.3	577.087	-1.27523	0.289375	-4.40685	1.05e-05	0.00123718
ENSG00000242697	RPL5P12	66.8457	1.27394	0.390584	3.26164	0.00110771	0.0256286
ENSG00000214021	TTLL3	532.058	-1.27382	0.444261	-2.86729	0.00414009	0.058228
ENSG00000220848	RPS18P9	236.159	1.27272	0.411185	3.09524	0.00196651	0.0368715
ENSG00000235225	AC016712.1	37.2952	1.27268	0.474954	2.6796	0.00737107	0.0833394
ENSG00000227972	THAP12P3	41.9847	1.27262	0.416726	3.05385	0.00225925	0.0406045
ENSG00000151502	VPS26B	5057.18	-1.27193	0.284037	-4.47805	7.53e-06	0.000972873
ENSG00000261612	SUB1P3	188.174	1.27077	0.393348	3.23065	0.00123511	0.0277662
ENSG00000269352	PTOV1-AS2	34.489	-1.27025	0.474781	-2.67544	0.00746315	0.0837347
ENSG00000278993	AC002350.1	91.478	1.26999	0.414454	3.06424	0.00218225	0.0395938
ENSG00000233045	AC097523.1	169.754	1.26952	0.352706	3.59937	0.000318984	0.0118378
ENSG00000055163	CYFIP2	13745.4	-1.2688	0.361612	-3.50873	0.000450246	0.0144939
ENSG00000113161	HMGCR	2574.02	1.26856	0.345222	3.6746	0.000238219	0.0100055
ENSG00000224094	RPS24P8	527.117	1.26808	0.271348	4.67328	2.96e-06	0.000523606
ENSG00000124126	PREX1	8043.07	-1.26745	0.374625	-3.38326	0.000716313	0.019477
ENSG00000272195	AL356512.1	104.75	-1.26679	0.413114	-3.06644	0.00216628	0.0393612
ENSG00000086666	ZFAND6	7474.36	1.26663	0.397441	3.18698	0.00143769	0.0301569
ENSG00000156675	RAB11FIP1	4320.72	1.26519	0.441609	2.86495	0.00417079	0.058526
ENSG00000274272	AC069281.2	163.038	-1.26505	0.442117	-2.86133	0.00421862	0.0589019
ENSG00000242571	RPL21P11	234.917	1.26469	0.393672	3.21254	0.00131566	0.0286864
ENSG00000137364	TPMT	2547.58	1.26435	0.224553	5.63053	1.8e-08	1.02e-05
ENSG00000225200	AC246787.1	542.81	1.26434	0.31864	3.96793	7.25e-05	0.00456445
ENSG00000243517	AC024940.3	546.804	1.26425	0.384961	3.28411	0.00102305	0.0243773
ENSG00000253506	NACA2	144.979	1.26409	0.432534	2.92252	0.00347214	0.0519701
ENSG00000214366	EIF4EP5	41.6891	1.26389	0.359884	3.51194	0.000444853	0.0144165
ENSG00000198064	NPIPB13	46.4228	-1.26388	0.428162	-2.95189	0.0031584	0.0489369
ENSG00000240674	AC106872.2	423.139	1.26299	0.395586	3.19272	0.0014094	0.0298633
ENSG00000279799	AC006077.2	276.726	-1.26201	0.452925	-2.78635	0.00533055	0.0680679
ENSG00000211584	SLC48A1	2640.69	-1.26193	0.475037	-2.65649	0.00789582	0.0869189
ENSG00000168026	TTC21A	200.943	-1.26193	0.481833	-2.61902	0.00881816	0.092847
ENSG00000184640	2022-09-09	12152.3	-1.26118	0.412779	-3.05534	0.00224809	0.0404511
ENSG00000151332	MBIP	3105.15	1.26079	0.412311	3.05787	0.00222918	0.0402284
ENSG00000166126	AMN	573.307	1.25939	0.367431	3.42756	0.000609037	0.0177058
ENSG00000225057	AC012485.1	18.7153	1.25893	0.487501	2.58242	0.00981099	0.0990314
ENSG00000181788	SIAH2	11906.9	-1.25678	0.40439	-3.10784	0.00188462	0.0358824
ENSG00000169193	CCDC126	871.045	1.25669	0.317501	3.95807	7.56e-05	0.00470936
ENSG00000255725	TDGP1	26.0187	1.25539	0.399612	3.14152	0.00168071	0.0332516
ENSG00000214914	RPL23AP3	113.488	1.25493	0.252487	4.97028	6.69e-07	0.00017153
ENSG00000151967	SCHIP1	309.742	-1.25484	0.422804	-2.96789	0.00299849	0.0479307
ENSG00000049769	PPP1R3F	447.194	-1.25323	0.333267	-3.76044	0.000169614	0.0081848
ENSG00000146677	AC004453.1	1166.25	1.25299	0.409736	3.05806	0.00222777	0.0402266
ENSG00000230508	RPL19P21	25.2639	1.25287	0.388962	3.22107	0.00127715	0.0282544
ENSG00000240914	RPL15P2	1104.6	1.25227	0.357243	3.50538	0.00045596	0.0145921
ENSG00000261635	AC103988.1	24.5977	1.25215	0.429708	2.91396	0.0035688	0.0529506
ENSG00000083845	RPS5	31113.1	1.25165	0.423189	2.95766	0.0030998	0.0483699
ENSG00000228847	ATP5MC2P4	11.6093	1.25122	0.463873	2.69733	0.00698978	0.0813282
ENSG00000228205	AC131235.1	1348.02	1.25038	0.379116	3.29814	0.000973263	0.0236122
ENSG00000240371	RPS4XP13	66.8535	1.24996	0.379291	3.29552	0.000982383	0.0237322
ENSG00000048471	SNX29	932.25	-1.24962	0.349509	-3.57537	0.000349733	0.0124269
ENSG00000141391	PRELID3A	35.113	-1.24933	0.414188	-3.01635	0.00255841	0.0436882
ENSG00000172172	MRPL13	3995.48	1.24824	0.403779	3.09138	0.00199228	0.0372186
ENSG00000224631	RPS27AP16	2709.1	1.24774	0.352282	3.54188	0.000397284	0.0134644
ENSG00000119878	CRIPT	1217.04	1.24715	0.348788	3.57568	0.000349325	0.0124269
ENSG00000135924	DNAJB2	202.69	-1.24656	0.382536	-3.25867	0.00111935	0.0258137
ENSG00000043143	JADE2	1618.89	-1.24634	0.404624	-3.08024	0.00206836	0.0382819
ENSG00000164117	FBXO8	878.043	1.24583	0.390755	3.18826	0.0014313	0.0301454
ENSG00000227337	RPL23AP43	55.1426	1.24548	0.333002	3.74017	0.000183894	0.0085651
ENSG00000137970	RPL7P9	1977.13	1.24398	0.300559	4.13889	3.49e-05	0.0028448
ENSG00000122406	RPL5	55688.9	1.2439	0.361957	3.4366	0.000589073	0.0172066
ENSG00000122592	HOXA7	311.265	1.24362	0.389277	3.19469	0.00139982	0.0297421
ENSG00000143624	INTS3	2131.48	-1.24358	0.43162	-2.88118	0.00396188	0.0565743
ENSG00000217027	TPT1P4	111.71	1.2432	0.425899	2.919	0.00351157	0.0523286
ENSG00000236801	RPL24P8	332.758	1.24231	0.356816	3.48165	0.000498338	0.0154194
ENSG00000101132	PFDN4	2105.25	1.2406	0.443114	2.79972	0.00511464	0.066274
ENSG00000228501	RPL15P18	666.912	1.24048	0.327175	3.79148	0.000149753	0.00748448
ENSG00000241923	RPL14P3	56.6929	1.23998	0.382202	3.2443	0.00117741	0.0267914
ENSG00000104408	EIF3E	19301.5	1.23869	0.306171	4.04575	5.22e-05	0.00362095
ENSG00000170092	SPDYE5	48.5157	-1.23859	0.480829	-2.57594	0.00999674	0.100185
ENSG00000136068	FLNB	3212.64	-1.2375	0.480036	-2.57794	0.00993917	0.0998686
ENSG00000226742	HSBP1L1	800.556	1.23738	0.446167	2.77335	0.00554827	0.0697068
ENSG00000198039	ZNF273	1200.26	1.2368	0.427402	2.89376	0.00380664	0.0551506
ENSG00000136897	MRPL50	1687.32	1.23586	0.415313	2.97573	0.00292291	0.047114
ENSG00000228053	AL158823.1	111.829	1.23513	0.399691	3.09021	0.00200015	0.0373431
ENSG00000197619	ZNF615	841.491	1.23478	0.321835	3.83667	0.000124712	0.00660543
ENSG00000171928	TVP23B	1960.54	1.23474	0.269606	4.57978	4.65e-06	0.000716519
ENSG00000176248	ANAPC2	430.928	-1.23453	0.273041	-4.52141	6.14e-06	0.000855722
ENSG00000104231	ZFAND1	3642.28	1.23328	0.318291	3.87468	0.000106765	0.00604
ENSG00000188873	RPL10AP2	169.509	1.23186	0.39596	3.11107	0.00186409	0.0356457
ENSG00000100379	KCTD17	679.769	-1.23178	0.319719	-3.8527	0.000116823	0.00634329
ENSG00000180211	FO393411.1	294.249	1.22993	0.290162	4.23877	2.25e-05	0.00209312
ENSG00000112306	RPS12	19498.1	1.22927	0.361904	3.39668	0.000682088	0.0188167
ENSG00000224321	RPL12P14	75.543	1.22723	0.380439	3.22583	0.00125608	0.0280126
ENSG00000258501	EIF3LP1	32.2658	1.22702	0.391562	3.13365	0.00172645	0.0339196
ENSG00000146828	SLC12A9	999.078	-1.22702	0.345574	-3.55067	0.000384257	0.0132328
ENSG00000275774	HNRNPCL2	15.2149	1.2267	0.386224	3.17615	0.00149245	0.0307344
ENSG00000241494	AL355032.1	253.261	1.2266	0.411474	2.981	0.00287313	0.0467207
ENSG00000267742	SINHCAFP2	85.5543	1.22572	0.415549	2.94963	0.0031815	0.049124
ENSG00000135473	PAN2	1703.15	-1.2257	0.325158	-3.76955	0.000163539	0.00799189
ENSG00000139372	TDG	2338.35	1.22392	0.281005	4.35552	1.33e-05	0.00146028
ENSG00000134108	ARL8B	6950.96	1.22355	0.241861	5.05888	4.22e-07	0.000123654
ENSG00000213609	RPL7AP50	145.244	1.22336	0.289346	4.22803	2.36e-05	0.00216651
ENSG00000231169	EEF1B2P1	160.039	1.22227	0.38702	3.15816	0.0015877	0.0320107
ENSG00000185262	UBALD2	1184.67	-1.22184	0.432219	-2.8269	0.00470007	0.0629135
ENSG00000261557	EEF1A1P38	59.5015	1.22154	0.362422	3.37048	0.000750371	0.0200864
ENSG00000279069	AC015813.5	52.6237	-1.21975	0.42811	-2.84916	0.00438341	0.0601391
ENSG00000229534	HNRNPA1P53	13.9428	1.21921	0.384862	3.16792	0.00153532	0.0313032
ENSG00000177350	RPL13AP3	36.7058	1.21906	0.456687	2.66936	0.00759959	0.0848635
ENSG00000140280	LYSMD2	2868.4	1.21801	0.452721	2.69042	0.00713631	0.0821133
ENSG00000104880	ARHGEF18	133.275	-1.21734	0.410066	-2.96865	0.00299107	0.0478617
ENSG00000229204	PTGES3P3	44.9709	1.21673	0.304063	4.00159	6.29e-05	0.00417477
ENSG00000140948	ZCCHC14	244.446	-1.21663	0.404456	-3.00807	0.00262915	0.0444502
ENSG00000245910	SNHG6	2249.21	1.21455	0.32989	3.68167	0.000231711	0.00981251
ENSG00000236762	RPL19P16	106.309	1.2141	0.303301	4.00297	6.26e-05	0.00415944
ENSG00000241651	AC099340.1	77.2284	1.21196	0.394757	3.07014	0.00213958	0.0390316
ENSG00000187556	NANOS3	53.3338	1.21195	0.449398	2.69684	0.00700003	0.081386
ENSG00000172534	HCFC1	3858.43	-1.21174	0.282136	-4.29488	1.75e-05	0.00174711
ENSG00000149782	PLCB3	439.094	-1.21151	0.256842	-4.71695	2.39e-06	0.000455481
ENSG00000166200	COPS2	6143.43	1.21042	0.348107	3.47714	0.000506799	0.0155717
ENSG00000123268	ATF1	1313.29	1.20845	0.366333	3.29877	0.000971096	0.0235877
ENSG00000100744	GSKIP	2141.08	1.20754	0.320566	3.76691	0.000165281	0.00801338
ENSG00000074370	ATP2A3	15844	-1.20754	0.278693	-4.33287	1.47e-05	0.00156247
ENSG00000215895	AL354702.1	809.023	1.20746	0.373964	3.22881	0.00124304	0.0278527
ENSG00000217130	AL139100.1	231.953	1.20666	0.409132	2.94931	0.00318483	0.049124
ENSG00000105849	TWISTNB	4391.87	1.20645	0.257768	4.68036	2.86e-06	0.000518614
ENSG00000224646	AC007387.1	34.7334	1.2063	0.383526	3.1453	0.00165919	0.0329345
ENSG00000213363	RPS3P6	124.656	1.20516	0.387241	3.11217	0.00185717	0.0355577
ENSG00000189283	FHIT	1676.18	-1.2046	0.380619	-3.16486	0.00155158	0.031468
ENSG00000243830	AC092865.1	65.541	1.20371	0.341427	3.52554	0.000422614	0.0140329
ENSG00000197958	RPL12	21712.5	1.20361	0.339997	3.54006	0.000400033	0.013519
ENSG00000232472	EEF1B2P3	1521.76	1.20356	0.362963	3.31592	0.00091341	0.0226826
ENSG00000137547	MRPL15	3241.92	1.20351	0.402147	2.99271	0.00276513	0.045658
ENSG00000224856	AL035398.1	25.251	1.20291	0.358941	3.35127	0.000804407	0.0209343
ENSG00000213383	AC104297.1	25.7123	1.20271	0.3792	3.17172	0.00151541	0.0310618
ENSG00000198720	ANKRD13B	291.111	-1.20138	0.431633	-2.78334	0.00538029	0.0686008
ENSG00000236058	RPL17P36	302.407	1.20078	0.343162	3.49915	0.000466744	0.0147684
ENSG00000214199	EEF1A1P12	993.864	1.20015	0.342919	3.49981	0.000465598	0.0147473
ENSG00000225067	RPL23AP2	51.1845	1.20008	0.283785	4.22883	2.35e-05	0.00216651
ENSG00000254701	AC138866.2	48.6261	-1.19875	0.454205	-2.63922	0.00830977	0.089718
ENSG00000259612	EEF1A1P22	171.336	1.19815	0.32868	3.64535	0.000267027	0.0106924
ENSG00000023330	ALAS1	3893.89	1.19813	0.286307	4.18478	2.85e-05	0.00247544
ENSG00000155096	AZIN1	13718.6	1.19782	0.294023	4.07388	4.62e-05	0.00340547
ENSG00000138326	RPS24	13068.1	1.19774	0.266154	4.50018	6.79e-06	0.000908827
[truncated: 335 more rows]
