# Supplementary material for: Molecular profiling of pre- and post- 5-azacytidine myelodysplastic syndrome samples identifies predictors of response
Source: Front Oncol. 2024 Sep 23;14:1438052. doi: 10.3389/fonc.2024.1438052 (PMC11456566; doi:10.3389/fonc.2024.1438052)
Supplement: Supplementary Table 5 — List of genes differentially expressed between post-treatment MDS HSPCs and healthy controls. [file Table5.xlsx]

## Sheet: Sheet1
Supplementary Table 5. List of genes differentially expressed between post-treatment MDS/AML CD34+ cells and healthy controls
ENSG	gene_symbol	baseMean	log2FoldChange_MDS/AML_vs_control	lfcSE	stat	pvalue	padj
ENSG00000129824	RPS4Y1	2251.75	14.4659	1.59577	9.06515	1.24e-19	3.64e-15
ENSG00000198692	EIF1AY	1124.81	13.4646	1.61656	8.32914	8.14e-17	1.19e-12
ENSG00000131002	TXLNGY	807.764	12.9869	1.62562	7.98889	1.36e-15	9.95e-12
ENSG00000012817	KDM5D	738.167	12.8569	1.63413	7.86773	3.61e-15	1.76e-11
ENSG00000233864	TTTY15	311.311	10.6493	1.55145	6.8641	6.69e-12	2.03e-08
ENSG00000154620	TMSB4Y	156.208	10.6167	1.59557	6.65387	2.85e-11	6.95e-08
ENSG00000114374	USP9Y	85.481	9.74703	1.88962	5.15818	2.49e-07	0.000121474
ENSG00000183878	UTY	564.51	9.3072	1.43702	6.47673	9.37e-11	1.96e-07
ENSG00000176728	TTTY14	56.0353	9.13786	1.91964	4.7602	1.93e-06	0.000513901
ENSG00000067048	DDX3Y	3007.17	9.07222	1.13997	7.9583	1.74e-15	1.02e-11
ENSG00000278756	MIR6722	13.8341	-7.8547	1.22784	-6.39716	1.58e-10	2.57e-07
ENSG00000241859	ANOS2P	19.7743	7.63647	1.86157	4.10216	4.09e-05	0.0040972
ENSG00000230830	ARPP21-AS1	11.8944	-7.63624	1.86508	-4.09432	4.23e-05	0.00419528
ENSG00000231535	LINC00278	18.343	7.52722	2.16431	3.47789	0.000505378	0.0202229
ENSG00000226159	LINC01375	39.2118	-7.38946	1.38214	-5.34641	8.97e-08	5.14e-05
ENSG00000067646	ZFY	507.099	7.23509	1.24161	5.82719	5.64e-09	5.68e-06
ENSG00000165066	NKX6-3	11.7721	-7.19906	1.4286	-5.03923	4.67e-07	0.000184616
ENSG00000253811	AC136424.2	8.58676	-7.16577	1.86261	-3.84717	0.000119492	0.00816033
ENSG00000259383	AC012414.3	8.51924	-7.15372	2.49999	-2.86151	0.00421633	0.0738402
ENSG00000198883	PNMA5	96.9682	7.08406	1.41156	5.01861	5.2e-07	0.000202837
ENSG00000106128	GHRHR	7.28502	-6.92895	1.5271	-4.53732	5.7e-06	0.00112268
ENSG00000229236	TTTY10	11.5091	6.85622	2.13663	3.20889	0.00133247	0.0377483
ENSG00000152672	CLEC4F	8.74117	-6.76291	1.49458	-4.52495	6.04e-06	0.00115117
ENSG00000142182	DNMT3L	10.0236	-6.7517	1.3502	-5.00052	5.72e-07	0.000211544
ENSG00000184564	SLITRK6	20.3766	6.71214	1.85167	3.62491	0.000289064	0.014643
ENSG00000276778	LINC02227	60.1223	-6.66187	1.57794	-4.22189	2.42e-05	0.00286492
ENSG00000229950	TFAP2A-AS1	5.515	-6.52847	1.14829	-5.68538	1.31e-08	1.12e-05
ENSG00000223985	LINC01874	9.12129	6.52008	2.46673	2.64321	0.00821246	0.107305
ENSG00000121743	GJA3	5.40034	-6.49775	2.13883	-3.038	0.00238156	0.0528274
ENSG00000235653	AC007253.1	4.94384	-6.37005	2.45999	-2.58946	0.0096126	0.116681
ENSG00000122585	NPY	767.592	-6.36818	1.55932	-4.08395	4.43e-05	0.00434273
ENSG00000168490	PHYHIP	28.6751	-6.35481	1.80348	-3.52364	0.00042566	0.0182856
ENSG00000161798	AQP5	48.9827	-6.3374	2.43399	-2.60371	0.00922206	0.114208
ENSG00000160963	COL26A1	6.32285	-6.29467	1.76971	-3.55689	0.000375276	0.0167721
ENSG00000188000	OR7D2	6.23421	-6.26956	1.88281	-3.32989	0.000868801	0.0288899
ENSG00000185274	GALNT17	14.8017	-6.25828	1.59297	-3.92868	8.54e-05	0.00672914
ENSG00000214376	VSTM5	5.86832	-6.1813	1.71216	-3.61024	0.000305915	0.0150704
ENSG00000285079	AL513493.1	58.5567	-6.15588	1.45835	-4.22113	2.43e-05	0.00286492
ENSG00000232494	AL161912.1	4.21647	-6.14052	1.95082	-3.14766	0.00164582	0.0429132
ENSG00000243016	AC112482.1	4.20195	-6.13637	1.50128	-4.08742	4.36e-05	0.00429277
ENSG00000254997	KRTAP5-9	4.16742	-6.12234	1.46082	-4.19102	2.78e-05	0.00313396
ENSG00000101180	HRH3	4.10045	-6.10113	1.68619	-3.61829	0.00029656	0.0148682
ENSG00000232517	AC112198.2	5.57375	-6.09946	2.2119	-2.75756	0.00582344	0.0887915
ENSG00000225585	IPPKP1	13.1595	6.08189	1.55831	3.90287	9.51e-05	0.00717952
ENSG00000251497	PITPNM2-AS1	12.2286	-6.0771	1.79373	-3.38796	0.000704148	0.0254093
ENSG00000136883	KIF12	4.00621	-6.06589	1.52168	-3.98631	6.71e-05	0.0056692
ENSG00000275747	IGHV3-79	3.99427	-6.06216	1.96346	-3.0875	0.0020185	0.0480842
ENSG00000261018	AC002101.1	4.5709	-6.04076	1.16948	-5.16533	2.4e-07	0.000118903
ENSG00000169436	COL22A1	5.33803	-6.0351	1.28108	-4.71096	2.47e-06	0.000585906
ENSG00000226954	AL023802.1	8.15754	-6.01508	1.36485	-4.40713	1.05e-05	0.0017105
ENSG00000249364	AC112206.2	5.28401	-6.00461	1.87942	-3.19492	0.00139869	0.0390472
ENSG00000007372	PAX6	3.68545	-5.94443	1.5701	-3.78602	0.000153081	0.00970588
ENSG00000258678	LINC02317	3.67566	-5.94407	1.64401	-3.61559	0.000299663	0.0148991
ENSG00000217896	ZNF839P1	6.10227	5.9418	2.14189	2.77409	0.00553572	0.0865722
ENSG00000144596	GRIP2	5.05845	-5.94164	1.36497	-4.35294	1.34e-05	0.0019896
ENSG00000168348	INSM2	3.62844	-5.92042	2.10047	-2.81862	0.00482307	0.0800077
ENSG00000173578	XCR1	5.5085	-5.87153	1.96871	-2.98242	0.00285977	0.0586073
ENSG00000074211	PPP2R2C	53.49	-5.8648	1.20156	-4.88101	1.06e-06	0.000331715
ENSG00000185761	ADAMTSL5	8.30987	-5.84224	1.14737	-5.09184	3.55e-07	0.000164031
ENSG00000253673	AC025437.4	17.8636	-5.83642	1.43845	-4.05744	4.96e-05	0.00461839
ENSG00000176584	DMBT1P1	3.2198	-5.74733	2.12163	-2.70892	0.00675027	0.0960582
ENSG00000150893	FREM2	8.00531	-5.74562	1.88795	-3.0433	0.00233998	0.0525529
ENSG00000165186	PTCHD1	3.21525	-5.74527	2.1472	-2.67571	0.00745717	0.101663
ENSG00000268257	AIRN	4.36094	-5.74338	0.99195	-5.78999	7.04e-09	6.86e-06
ENSG00000119698	PPP4R4	3.20296	-5.74166	1.63894	-3.50327	0.000459585	0.0191084
ENSG00000225028	AC096541.1	3.15223	-5.72132	1.81035	-3.16034	0.00157583	0.0417589
ENSG00000163286	ALPG	18.6848	-5.71229	0.746172	-7.65545	1.93e-14	8.04e-11
ENSG00000240666	MME-AS1	3.12198	-5.707	2.02469	-2.81871	0.00482177	0.0800077
ENSG00000178662	CSRNP3	4.22815	-5.70085	1.43262	-3.97933	6.91e-05	0.00580468
ENSG00000233070	ZFY-AS1	4.98716	5.65118	2.07071	2.7291	0.00635066	0.0930535
ENSG00000224539	SAGE4P	3.51446	-5.64672	1.36848	-4.12627	3.69e-05	0.00380799
ENSG00000236241	AC119744.1	2.97297	-5.63281	2.05632	-2.73927	0.00615754	0.0911767
ENSG00000280048	AC012409.5	2.98202	-5.63125	1.24248	-4.53227	5.84e-06	0.00112268
ENSG00000253456	AC136424.1	11.8208	-5.63025	1.80563	-3.11817	0.00181977	0.0454148
ENSG00000261528	AC002400.1	5.51674	-5.61391	1.10536	-5.07878	3.8e-07	0.000165715
ENSG00000164756	SLC30A8	4.64917	-5.61268	1.43571	-3.90933	9.26e-05	0.00704482
ENSG00000273706	LHX1	3.46916	-5.60146	1.44025	-3.88924	0.00010056	0.00742236
ENSG00000272983	AL117339.4	2.90053	-5.59725	1.60871	-3.47935	0.000502632	0.0202229
ENSG00000255191	AP003555.3	2.89153	-5.59638	1.58343	-3.53434	0.000408801	0.0178648
ENSG00000244681	MTHFD2P1	3.93278	-5.5906	1.15556	-4.838	1.31e-06	0.000368738
ENSG00000278847	AC006157.1	4.68384	5.56201	2.04687	2.71732	0.00658134	0.0945288
ENSG00000262006	AC005920.4	2.77684	-5.53786	2.04126	-2.71296	0.00666851	0.0954064
ENSG00000236740	AL033384.1	2.76392	-5.52958	2.03947	-2.71129	0.00670226	0.0956544
ENSG00000219088	Z97206.1	2.75265	-5.52494	2.00926	-2.74974	0.00596424	0.089809
ENSG00000231252	AC099792.1	5.03393	-5.51463	1.42809	-3.86154	0.000112676	0.00793195
ENSG00000134533	RERG	2.71731	-5.50707	1.66931	-3.29901	0.000970263	0.0311304
ENSG00000261020	AC132825.3	2.71633	-5.50357	2.10323	-2.61672	0.00887797	0.111947
ENSG00000187922	LCN10	47.3759	-5.49681	1.53573	-3.57929	0.000344529	0.0160925
ENSG00000243323	PTPRVP	5.83783	-5.49597	0.832647	-6.6006	4.09e-11	9.21e-08
ENSG00000196092	PAX5	574.193	-5.49332	1.70267	-3.2263	0.00125404	0.0365082
ENSG00000110169	HPX	4.83946	-5.46679	1.24735	-4.38271	1.17e-05	0.0018419
ENSG00000280225	AC237221.2	2.65421	-5.46662	1.70718	-3.20214	0.00136411	0.0383749
ENSG00000251643	AC093763.2	2.64366	-5.46305	2.10423	-2.59622	0.00942549	0.115464
ENSG00000167011	NAT16	3.73019	-5.46019	1.50358	-3.63146	0.000281819	0.0144261
ENSG00000277215	SPANXA2-OT1	2.6218	-5.4502	1.66902	-3.26551	0.00109266	0.0335125
ENSG00000264151	AC090403.1	2.55376	-5.4084	1.10474	-4.89562	9.8e-07	0.000319571
ENSG00000234389	AC007278.1	4.67018	-5.40138	1.2353	-4.37252	1.23e-05	0.00190844
ENSG00000266736	GTF2IP6	2.4943	-5.38535	1.6435	-3.27676	0.00105004	0.0326212
ENSG00000162494	LRRC38	17.778	-5.38481	1.24972	-4.30882	1.64e-05	0.00226742
ENSG00000235885	LINC01828	3.42564	-5.38156	1.49179	-3.60745	0.000309226	0.015165
ENSG00000126266	FFAR1	104.861	-5.37579	1.46324	-3.6739	0.000238876	0.0129674
ENSG00000146678	IGFBP1	2.48146	-5.37333	2.07633	-2.5879	0.00965627	0.116871
ENSG00000257743	MGAM2	4.57266	-5.3654	0.965824	-5.55526	2.77e-08	2.09e-05
ENSG00000231690	LINC00574	2.43877	-5.34855	1.5617	-3.42482	0.000615215	0.0231728
ENSG00000156920	ADGRG4	2.86169	-5.3403	1.26225	-4.23079	2.33e-05	0.00281269
ENSG00000248210	LINC02355	2.40628	-5.33115	1.59898	-3.33409	0.000855791	0.0285547
ENSG00000272634	OR51F5P	2.38704	-5.31372	1.63713	-3.24576	0.00117138	0.0349726
ENSG00000234177	LINC01114	33.3691	5.3108	1.31851	4.02788	5.63e-05	0.00504613
ENSG00000270691	AL161912.3	2.37028	-5.30875	1.61298	-3.29126	0.000997393	0.0317568
ENSG00000256870	SLC5A8	2.35847	-5.29414	1.25586	-4.21554	2.49e-05	0.00292508
ENSG00000265623	MIR3139	3.74598	-5.2916	1.62539	-3.2556	0.00113155	0.0342381
ENSG00000187229	AC100800.1	3.21674	-5.28901	1.34312	-3.93786	8.22e-05	0.00654757
ENSG00000259807	AC009093.1	2.33628	-5.28667	1.54347	-3.42518	0.000614393	0.0231728
ENSG00000178358	OR2D3	2.3269	-5.27625	1.71852	-3.07022	0.00213901	0.0500569
ENSG00000162670	BRINP3	2.30573	-5.26735	1.70553	-3.08839	0.00201246	0.0480593
ENSG00000248416	AC107464.2	3.22	-5.25684	1.46872	-3.5792	0.000344653	0.0160925
ENSG00000165061	ZMAT4	2.26876	-5.24305	1.66833	-3.1427	0.00167399	0.0432618
ENSG00000228613	AC141930.1	14.8874	-5.21634	1.96809	-2.65046	0.00803832	0.106217
ENSG00000228339	AMD1P1	4.23337	-5.20963	1.68198	-3.09732	0.00195282	0.0472507
ENSG00000273677	RF02204	3.66095	5.20928	1.8042	2.8873	0.00388563	0.0703674
ENSG00000229292	RFPL4AL1	7.31248	5.20761	1.55402	3.35106	0.000805041	0.0273972
ENSG00000139767	SRRM4	3.04583	-5.2076	1.10273	-4.72246	2.33e-06	0.000573377
ENSG00000169894	MUC3A	2.20987	-5.20189	1.71698	-3.02968	0.00244812	0.0537612
ENSG00000214039	LINC02418	2.18333	-5.18508	1.68942	-3.06914	0.00214674	0.0501977
ENSG00000227201	CNN2P1	3.00721	-5.17986	1.36624	-3.79134	0.000149837	0.0095624
ENSG00000230805	AL132709.1	7.42503	-5.16075	1.22947	-4.19753	2.7e-05	0.00308592
ENSG00000102290	PCDH11X	4.51466	-5.15212	1.44258	-3.57145	0.000355009	0.0162041
ENSG00000204283	LINC01973	28.177	-5.14394	1.71031	-3.00761	0.00263312	0.0557302
ENSG00000279400	AC008957.3	2.06659	-5.11386	1.63022	-3.13691	0.0017074	0.0438302
ENSG00000123572	NRK	2.44111	-5.10978	1.89693	-2.6937	0.00706627	0.0982588
ENSG00000260844	AC055876.4	26.3439	-5.0999	1.27195	-4.0095	6.08e-05	0.00529035
ENSG00000150244	TRIM48	2.88527	-5.08678	1.37622	-3.69621	0.000218846	0.0122541
ENSG00000147689	FAM83A	538.369	5.06672	1.3589	3.72854	0.000192596	0.0112587
ENSG00000264424	MYH4	2.74971	-5.05817	1.85615	-2.72509	0.0064284	0.0935981
ENSG00000109758	HGFAC	8.62168	-5.05404	1.50817	-3.35111	0.000804894	0.0273972
ENSG00000237763	AMY1A	2.33888	-5.04397	1.28426	-3.92754	8.58e-05	0.00672981
ENSG00000233208	LINC00642	13.7589	-5.04084	1.30555	-3.86107	0.000112891	0.00793195
ENSG00000114948	ADAM23	9.26978	-5.02776	1.85722	-2.70714	0.0067865	0.0962925
ENSG00000240710	AL512306.3	25.209	-5.02731	1.23736	-4.06292	4.85e-05	0.00455729
ENSG00000257588	AC025154.2	13.5433	-5.01912	1.47484	-3.40316	0.000666118	0.0245214
ENSG00000179270	C2orf71	2.68639	-5.01874	1.93849	-2.58899	0.00962585	0.116697
ENSG00000143107	FNDC7	4.97167	-5.0112	1.34083	-3.73739	0.00018594	0.0109574
ENSG00000160224	AIRE	301.22	-5.00879	1.50605	-3.32578	0.000881716	0.0291865
ENSG00000243444	PALM2	4.21983	-5.00416	1.63937	-3.0525	0.00226947	0.0517025
ENSG00000231764	DLX6-AS1	6.3716	-4.99052	1.5797	-3.15915	0.0015823	0.0417786
ENSG00000104901	DKKL1	3.07672	-4.98855	1.18852	-4.19728	2.7e-05	0.00308592
ENSG00000275549	STPG3-AS1	2.9729	-4.96003	0.949248	-5.22522	1.74e-07	9.24e-05
ENSG00000158077	NLRP14	1.87165	-4.95967	1.44361	-3.4356	0.000591235	0.0225503
ENSG00000273123	AC020634.1	4.363	-4.95871	1.26603	-3.91675	8.98e-05	0.00686735
ENSG00000250961	AC025470.2	4.62168	-4.95756	1.30796	-3.79029	0.000150469	0.00958183
ENSG00000224452	RSL24D1P6	3.04169	4.94562	1.43036	3.4576	0.000545008	0.0212684
ENSG00000267521	AC016168.1	44.2378	-4.94341	1.47199	-3.35831	0.000784206	0.0269983
ENSG00000201737	RNU1-133P	3.98803	-4.94282	1.67413	-2.95248	0.00315237	0.0624523
ENSG00000231574	LINC02015	1.84347	-4.93795	1.81715	-2.71742	0.00657936	0.0945288
ENSG00000224610	AC108879.1	5.15231	-4.9327	1.70217	-2.8979	0.00375674	0.0688225
ENSG00000271615	ACTG1P22	6.0552	-4.92305	1.71797	-2.86562	0.00416199	0.0731954
ENSG00000249881	AC008696.2	53.9064	-4.91951	1.27148	-3.86912	0.000109229	0.00779663
ENSG00000244062	AC080128.1	1.79027	-4.90721	1.31209	-3.74001	0.000184014	0.0109574
ENSG00000071991	CDH19	1.78875	-4.89975	1.69027	-2.89879	0.00374602	0.0688225
ENSG00000227477	STK4-AS1	3.33259	-4.89589	1.88785	-2.59338	0.00950387	0.115846
ENSG00000254489	AL136088.1	19.0635	-4.89186	1.32216	-3.6999	0.000215682	0.0121468
ENSG00000279278	AC245060.6	67.5775	-4.88201	1.02304	-4.77206	1.82e-06	0.000488987
ENSG00000175267	VWA3A	2.42478	-4.87942	1.46182	-3.33791	0.00084412	0.0282621
ENSG00000280953	AL390763.2	38.9692	-4.8784	1.63829	-2.97775	0.00290376	0.0592283
ENSG00000233623	PGAM1P11	3.27378	-4.87768	1.61293	-3.02412	0.00249358	0.0541896
ENSG00000258794	DUX4L27	1.75166	-4.87482	1.68385	-2.89505	0.00379097	0.0691674
ENSG00000237473	AC068759.1	2.50968	-4.86963	1.88987	-2.5767	0.00997479	0.118904
ENSG00000185352	HS6ST3	1.75601	-4.8657	1.36176	-3.5731	0.000352784	0.016137
ENSG00000080293	SCTR	2.42501	-4.86379	1.19931	-4.05549	5e-05	0.00464059
ENSG00000183242	WT1-AS	62.2365	4.84382	1.28053	3.78268	0.000155149	0.00981572
ENSG00000235052	AL021154.1	2.50869	-4.83973	1.35364	-3.57534	0.000349779	0.0160967
ENSG00000164161	HHIP	438.669	-4.83925	1.06664	-4.53689	5.71e-06	0.00112268
ENSG00000267206	LCN6	95.0188	-4.83876	1.22695	-3.94373	8.02e-05	0.00649536
ENSG00000174914	OR9G1	4.7576	-4.83622	1.47581	-3.27699	0.00104921	0.0326212
ENSG00000196565	HBG2	7.60281	4.83458	1.38983	3.47854	0.000504149	0.0202229
ENSG00000214919	AC104472.1	3.19718	-4.83385	1.86708	-2.58898	0.00962593	0.116697
ENSG00000134765	DSC1	5.31066	-4.82819	1.57843	-3.05885	0.00222188	0.0511366
ENSG00000253819	LINC01151	2.77939	-4.82728	1.23034	-3.92353	8.73e-05	0.00672981
ENSG00000166317	SYNPO2L	4.6428	-4.8258	1.22326	-3.94505	7.98e-05	0.00649536
ENSG00000182050	MGAT4C	9.38058	-4.82575	1.84377	-2.61733	0.00886206	0.111893
ENSG00000279846	AC015660.5	14.9948	-4.8243	1.50074	-3.21461	0.00130624	0.0373947
ENSG00000184012	TMPRSS2	2.74041	-4.82366	1.51126	-3.19181	0.00141386	0.0393204
ENSG00000187621	TCL6	248.188	-4.82356	1.46103	-3.30148	0.000961753	0.0309593
ENSG00000166736	HTR3A	6.54614	-4.81107	1.57469	-3.05526	0.00224869	0.0513491
ENSG00000197880	MDS2	9.29431	-4.80082	1.67464	-2.86677	0.00414686	0.0731053
ENSG00000223638	RFPL4A	30.8465	4.79177	1.55916	3.0733	0.00211703	0.0497017
ENSG00000258399	AL117190.1	9.42355	4.79018	1.66035	2.88504	0.00391364	0.0707432
ENSG00000260271	AL132996.1	63.5292	-4.77815	1.48099	-3.22632	0.00125395	0.0365082
ENSG00000043039	BARX2	1.64748	-4.77556	1.80074	-2.652	0.00800164	0.105876
ENSG00000236078	LINC01447	5.48172	-4.77103	1.52469	-3.12919	0.00175291	0.0443985
ENSG00000132911	NMUR2	2.65697	-4.76592	1.61363	-2.95353	0.00314158	0.0623812
ENSG00000105507	CABP5	75.4391	-4.75528	1.43991	-3.30249	0.000958312	0.0309174
ENSG00000186244	AC091180.1	1.60922	-4.75337	1.65516	-2.87185	0.00408081	0.0724214
ENSG00000276523	AC025287.3	5.35472	-4.75176	1.38831	-3.42269	0.000620055	0.0232951
ENSG00000219700	PTCHD3P3	2.60563	-4.74775	1.57675	-3.0111	0.00260306	0.0553935
ENSG00000256282	AC112694.1	1.60758	-4.74638	1.66571	-2.84946	0.00437934	0.0756524
ENSG00000101323	HAO1	1.61158	-4.74435	1.81953	-2.60747	0.00912154	0.113452
ENSG00000180801	ARSJ	7.56326	-4.74143	1.22351	-3.87527	0.000106505	0.00770556
ENSG00000233891	AC007179.2	5.01375	-4.74007	1.46897	-3.2268	0.00125184	0.0365082
ENSG00000133640	LRRIQ1	2.21086	-4.72652	1.41561	-3.33887	0.000841208	0.028204
ENSG00000234361	AL391863.2	1.55784	-4.70098	1.74895	-2.68789	0.00719047	0.0993325
ENSG00000254419	AL139349.1	2.51414	-4.69923	0.969121	-4.84896	1.24e-06	0.000365879
ENSG00000270292	AC079880.2	1.55018	-4.69329	1.73271	-2.70865	0.00675581	0.0960845
ENSG00000152578	GRIA4	2.16932	-4.68963	1.1747	-3.99218	6.55e-05	0.00557895
ENSG00000185332	TMEM105	21.3208	4.68721	1.51671	3.09039	0.00199894	0.0479303
ENSG00000122641	INHBA	1524.86	4.67958	0.924879	5.05967	4.2e-07	0.000175369
ENSG00000261445	AC018558.3	1.53263	-4.67235	1.74657	-2.67515	0.00746948	0.101783
ENSG00000257900	AL162632.1	1.51206	-4.66263	1.67791	-2.77882	0.00545561	0.0856401
ENSG00000254799	SLC25A47P1	2.86908	-4.66152	1.59784	-2.91739	0.00352975	0.06638
ENSG00000235142	LINC02532	6.18765	-4.65641	1.35557	-3.43502	0.000592516	0.0225503
ENSG00000204296	C6orf10	2.09515	-4.65343	1.42773	-3.25931	0.00111683	0.0340039
ENSG00000235445	AC016027.3	1.49452	-4.64447	1.69164	-2.74553	0.00604123	0.0900914
ENSG00000154646	TMPRSS15	2.07823	-4.6346	1.43189	-3.23669	0.00120926	0.0356304
ENSG00000172995	ARPP21	1034.22	-4.63356	1.70807	-2.71274	0.00667292	0.0954221
ENSG00000279679	AC091925.2	2.03747	-4.61597	1.42131	-3.24768	0.00116352	0.0348175
ENSG00000223914	LINC02471	4.44905	-4.61277	1.78544	-2.58355	0.00977879	0.117526
ENSG00000251348	HSPD1P11	6.44011	-4.59939	1.17462	-3.91563	9.02e-05	0.00688118
ENSG00000230453	ANKRD18B	110.289	4.59859	1.00953	4.55516	5.23e-06	0.00106249
ENSG00000227195	MIR663AHG	2.88675	-4.59315	1.52564	-3.01064	0.00260695	0.0553935
ENSG00000242686	AC107464.1	1.69705	-4.58758	1.08393	-4.23237	2.31e-05	0.00280455
ENSG00000122043	LINC00544	61.6975	-4.58374	1.56074	-2.9369	0.00331511	0.0643908
ENSG00000233577	AL022332.1	2.43667	-4.56204	1.66722	-2.73632	0.00621313	0.091488
ENSG00000180139	ACTA2-AS1	2.31558	-4.55395	1.65842	-2.74596	0.00603342	0.0900304
ENSG00000227491	CCNJP1	2.27706	4.54918	1.21507	3.74397	0.000181136	0.0108715
ENSG00000278831	AL513190.1	25.4375	-4.54602	1.45174	-3.13143	0.00173955	0.0442132
ENSG00000228131	IGHD6-6	8.56963	-4.54085	1.42728	-3.18147	0.00146529	0.0402373
ENSG00000229530	AL136097.1	3.06966	-4.53957	1.58586	-2.86252	0.00420286	0.0736925
ENSG00000079112	CDH17	2.99899	-4.52945	1.70125	-2.66242	0.00775809	0.103876
ENSG00000234255	AC012370.2	1.92724	-4.52893	1.25308	-3.61423	0.000301237	0.0149488
ENSG00000242353	RPL12P30	1.38708	-4.52878	1.7303	-2.61735	0.00886161	NA
ENSG00000243478	AOX2P	346.508	-4.52691	1.24431	-3.63808	0.000274682	0.0141599
ENSG00000185686	PRAME	109.647	4.52588	1.16827	3.874	0.000107062	0.00770764
ENSG00000162592	CCDC27	2.63679	-4.52535	0.979286	-4.62107	3.82e-06	0.000839006
ENSG00000237480	AL355306.2	2.64031	-4.52494	1.59865	-2.83047	0.00464795	0.0784835
ENSG00000271046	AL512631.1	9.74833	-4.52137	0.999396	-4.5241	6.07e-06	0.00115117
ENSG00000152931	PART1	9.99639	-4.51747	1.45064	-3.11413	0.00184491	0.0456217
ENSG00000236304	AP001189.1	406.355	-4.51376	0.934878	-4.82818	1.38e-06	0.000376398
ENSG00000253301	LINC01606	1.62716	-4.50799	1.52174	-2.96239	0.00305258	0.0612801
ENSG00000108231	LGI1	2.63017	-4.50569	1.40377	-3.2097	0.00132874	0.0377483
ENSG00000222650	RNU2-70P	1.86904	-4.49774	1.58895	-2.83064	0.00464554	0.0784835
ENSG00000175967	FO393415.1	4.53009	-4.49319	1.49694	-3.00159	0.00268573	0.0565164
ENSG00000185436	IFNLR1	29.5974	-4.48292	1.2406	-3.6135	0.000302092	0.0149607
ENSG00000218809	AL391903.1	17.8758	-4.46519	1.10941	-4.02483	5.7e-05	0.00506543
ENSG00000263409	MIR4747	3.91039	-4.46457	1.40443	-3.17891	0.00147831	0.0403676
ENSG00000223403	MEG9	22.8106	-4.45473	1.33215	-3.34401	0.000825768	0.0279356
ENSG00000173068	BNC2	19.0779	-4.45063	1.23511	-3.60343	0.000314043	0.0152087
ENSG00000173077	2022-12-01	2.52074	-4.43395	1.61263	-2.74952	0.00596829	0.089809
ENSG00000231482	AC141930.2	2.46175	-4.43038	1.71019	-2.59057	0.00958162	0.116406
ENSG00000275152	CCL16	1.26223	-4.39899	1.69015	-2.60272	0.00924861	NA
ENSG00000244227	LRRC77P	2.44334	-4.38471	1.49459	-2.93372	0.00334922	0.0645746
ENSG00000099725	PRKY	340.873	4.3673	1.01244	4.31366	1.61e-05	0.0022457
ENSG00000249961	TERB1	3.69259	-4.36064	1.44464	-3.01849	0.00254038	0.0547182
ENSG00000123977	DAW1	7.67792	-4.3547	1.59616	-2.72823	0.00636757	0.0931054
ENSG00000213400	RPL12P18	2.08543	-4.35082	1.63611	-2.65925	0.00783158	0.104477
ENSG00000223884	AC068481.1	2.01654	-4.34523	1.13414	-3.8313	0.00012747	0.00856511
ENSG00000213934	HBG1	73.7305	4.34254	0.870733	4.98722	6.13e-07	0.000217078
ENSG00000188153	COL4A5	536.259	4.31669	1.1082	3.89521	9.81e-05	0.00728718
ENSG00000207750	MIR553	1.40921	-4.30849	1.58277	-2.72212	0.00648641	NA
ENSG00000158497	HMHB1	29.5203	-4.30517	1.31904	-3.26386	0.00109905	0.0336025
ENSG00000135750	KCNK1	45.1648	4.29723	1.49613	2.87224	0.00407575	0.0723756
ENSG00000232739	AL607028.1	4.39959	-4.29558	1.42082	-3.02331	0.00250028	0.0542544
ENSG00000270174	AL022097.1	3.17627	-4.29084	1.41031	-3.04248	0.00234635	0.0525529
ENSG00000187893	CXXC1P1	1.39226	-4.28461	1.0991	-3.89828	9.69e-05	NA
ENSG00000223806	LINC00114	91.2337	-4.28179	1.58677	-2.69843	0.00696679	0.0974783
ENSG00000211650	IGLV5-45	131.554	4.26984	1.32628	3.21942	0.00128451	0.03699
ENSG00000147724	FAM135B	2.90436	-4.26604	1.61307	-2.64466	0.00817723	0.107008
ENSG00000140398	NEIL1	1974.67	-4.26284	0.739684	-5.76306	8.26e-09	7.79e-06
ENSG00000223442	TH2LCRR	5.41774	-4.25257	1.4989	-2.83713	0.00455209	0.0774015
ENSG00000233750	CICP27	1.35829	-4.24771	1.61025	-2.63793	0.0083415	NA
ENSG00000156564	LRFN2	122.752	-4.2364	1.63503	-2.59103	0.00956905	0.116394
ENSG00000228421	AC005013.1	1.3444	-4.23144	1.51879	-2.78606	0.00533528	NA
ENSG00000236075	AL359475.1	4.54612	-4.22893	1.55664	-2.7167	0.00659365	0.0946126
ENSG00000226683	PWWP2AP1	3.24201	-4.22471	1.48209	-2.85052	0.00436484	0.0755362
ENSG00000164082	GRM2	9.46987	-4.21924	1.30861	-3.22422	0.00126318	0.0365921
ENSG00000072832	CRMP1	615.1	-4.21793	1.03068	-4.09236	4.27e-05	0.00421651
ENSG00000125207	PIWIL1	2.17746	-4.21103	1.46151	-2.88128	0.00396069	0.0711537
ENSG00000123454	DBH	17.3752	-4.20515	1.43441	-2.93163	0.00337185	0.0647542
ENSG00000100884	CPNE6	2.09018	-4.19629	1.60916	-2.60775	0.00911387	0.113452
ENSG00000224967	AC009303.1	1.62789	-4.19481	1.49175	-2.81201	0.00492334	0.080845
ENSG00000267568	AC016168.2	50.6822	-4.19031	1.12521	-3.72403	0.00019607	0.0113709
ENSG00000277958	RF00017	1.09342	-4.1886	1.33113	-3.14665	0.00165153	NA
ENSG00000256651	AC006518.1	1.8493	-4.17714	1.2797	-3.26415	0.00109794	0.0336025
ENSG00000242641	LINC00971	4.15699	-4.17545	1.46645	-2.84731	0.00440904	0.0758069
ENSG00000121380	BCL2L14	39.0382	4.15872	1.29602	3.20884	0.00133269	0.0377483
ENSG00000258702	AL137786.1	4.8155	-4.15433	1.33284	-3.11689	0.00182769	0.0454148
ENSG00000262319	AC007952.6	3.31585	-4.1537	1.54226	-2.69326	0.00707566	0.0983097
ENSG00000275155	AC027348.1	5.78433	-4.15085	1.29074	-3.21588	0.00130044	0.0373384
ENSG00000223181	RNU6-1199P	1.71968	4.14586	1.51462	2.73723	0.00619594	0.0913269
ENSG00000259033	AL356804.1	23.7086	4.13904	1.38216	2.99461	0.00274793	0.0572891
ENSG00000162068	NTN3	8.96723	-4.12788	1.56046	-2.64529	0.0081621	0.106944
ENSG00000164330	EBF1	3636.64	-4.12073	0.98989	-4.16281	3.14e-05	0.00340473
ENSG00000267184	AC002545.1	3.45659	4.10099	1.20933	3.39113	0.000696055	0.0252419
ENSG00000269444	AC011491.2	2.69642	-4.09462	1.35426	-3.02351	0.00249861	0.0542544
ENSG00000240219	AL512306.2	52.928	-4.09413	0.979245	-4.18091	2.9e-05	0.00322682
ENSG00000250990	AC098851.1	4.20685	-4.07655	1.10532	-3.68811	0.000225928	0.0124362
ENSG00000206651	RF00019	2.75356	-4.07586	1.55879	-2.61475	0.00892929	0.112256
ENSG00000259377	AC026770.1	10.5224	-4.06743	1.11234	-3.65665	0.000255529	0.0135011
ENSG00000260545	AC026771.1	1.9482	-4.06336	1.42329	-2.8549	0.00430498	0.074827
ENSG00000262039	AC091180.5	3.96799	-4.05497	0.901764	-4.49671	6.9e-06	0.00124517
ENSG00000145506	NKD2	119.792	-4.05229	1.04549	-3.87597	0.000106203	0.00770273
ENSG00000232079	LINC01697	2.70878	-4.03984	0.948248	-4.26033	2.04e-05	0.00259413
ENSG00000204960	BLACE	134.736	-4.03949	1.55701	-2.59438	0.00947619	0.115785
ENSG00000228030	AC019084.1	1.91237	-4.03899	1.31911	-3.0619	0.00219934	0.0509135
ENSG00000278924	AC078883.4	8.10386	4.03581	1.33778	3.01679	0.00255463	0.0548829
ENSG00000196990	FAM163B	2.90981	-4.03095	1.53289	-2.62964	0.00854748	0.109558
ENSG00000128218	VPREB3	1315.36	-4.02613	1.26683	-3.17812	0.00148234	0.0403676
ENSG00000243847	RN7SL610P	2.56533	-4.01897	0.946167	-4.24763	2.16e-05	0.0026986
ENSG00000230787	PSAT1P3	1.58892	4.0178	1.51179	2.65765	0.00786878	0.104734
ENSG00000275586	RF00017	2.57797	-3.98977	1.54224	-2.587	0.00968167	0.116956
ENSG00000283378	BX088645.1	42.6357	-3.98716	1.46721	-2.71752	0.00657731	0.0945288
ENSG00000213698	AC240504.1	3.17824	3.98021	1.17913	3.37555	0.00073667	0.0261948
ENSG00000250686	AL049544.1	1.32709	-3.97071	1.44934	-2.73966	0.00615021	NA
ENSG00000233186	KLF4P1	6.71833	-3.9682	1.23306	-3.21816	0.00129016	0.0371163
ENSG00000225825	IGHD6-25	34.4773	-3.96429	0.978017	-4.05339	5.05e-05	0.00465449
ENSG00000113805	CNTN3	3.30789	-3.96324	1.48247	-2.6734	0.00750869	0.101937
ENSG00000006071	ABCC8	7.41851	-3.95698	1.32301	-2.99091	0.00278151	0.0577372
ENSG00000279106	AC009093.7	1.84452	-3.95262	1.42885	-2.7663	0.0056696	0.0873572
ENSG00000151640	DPYSL4	39.6799	-3.94595	1.01753	-3.87797	0.000105331	0.00765852
ENSG00000283526	PRRT1B	3.16528	-3.9282	1.15515	-3.40059	0.000672413	0.0246909
ENSG00000256314	AC078962.3	6.25342	-3.91867	1.00532	-3.89793	9.7e-05	0.00726772
ENSG00000271955	AC007100.1	11.8019	-3.91594	1.09365	-3.5806	0.000342805	0.0160832
ENSG00000103832	GOLGA8UP	3.06082	-3.91387	1.28413	-3.04788	0.00230464	0.0522288
ENSG00000250770	AC005865.2	4.01448	-3.90487	1.33492	-2.92518	0.00344258	0.0653821
ENSG00000211978	IGHV5-78	177.515	-3.8812	1.18252	-3.28215	0.00103018	0.0323293
ENSG00000196277	GRM7	4.58362	-3.88017	1.37815	-2.8155	0.00487015	0.0804528
ENSG00000278757	RF00026	1.80215	-3.86818	1.38218	-2.79861	0.00513224	0.0825138
ENSG00000263482	ANTXRLP1	58.1622	-3.83772	1.19533	-3.21058	0.00132465	0.0377483
ENSG00000259275	AC087477.2	1.84997	-3.83263	1.4496	-2.64393	0.00819497	0.107173
ENSG00000254951	AC044810.2	2.0138	-3.81412	1.46469	-2.60404	0.00921315	0.114208
ENSG00000224402	OR6D1P	1.92943	-3.80244	1.37621	-2.76298	0.00572762	0.0879729
ENSG00000263120	AC004584.3	6.67818	-3.79839	1.31075	-2.89787	0.00375705	0.0688225
ENSG00000252933	RNU6-1223P	1.6556	-3.79491	1.43343	-2.64744	0.00811041	0.106591
ENSG00000197444	OGDHL	109.396	3.79342	1.43248	2.64816	0.00809311	0.106491
ENSG00000227220	AL133346.1	19.2589	-3.78209	1.4458	-2.61591	0.0088991	0.112069
ENSG00000254060	AC022778.1	15.2532	-3.77739	1.0161	-3.71755	0.000201161	0.0115515
ENSG00000284543	LINC01226	143.331	-3.74901	1.25481	-2.98772	0.00281063	0.0578942
ENSG00000200397	RF00019	26.6113	-3.74812	0.668804	-5.60421	2.09e-08	1.7e-05
ENSG00000223929	MIR4432HG	70.0408	-3.74729	1.04418	-3.58876	0.00033226	0.0157709
ENSG00000283906	IGHV4-80	16.2497	-3.73657	1.08413	-3.44659	0.000567703	0.0218947
ENSG00000213046	EEF1A1P32	3.47824	-3.72115	1.22369	-3.04092	0.00235857	0.052727
ENSG00000166073	GPR176	933.864	-3.72101	1.11851	-3.32676	0.000878624	0.0291171
ENSG00000176956	LY6H	89.4823	-3.71984	1.03563	-3.59185	0.000328344	0.0156708
ENSG00000119125	GDA	3.72409	-3.71216	1.37989	-2.69019	0.00714105	0.0989702
ENSG00000227028	SLC8A1-AS1	107.098	-3.70438	0.953276	-3.88595	0.000101931	0.0074858
ENSG00000021461	CYP3A43	1.59734	-3.69953	1.37844	-2.68384	0.00727818	0.100157
ENSG00000232732	AC097717.1	16.8908	-3.69777	1.16362	-3.17782	0.00148387	0.0403676
ENSG00000236794	BCRP8	3.75885	-3.69619	1.03657	-3.56579	0.000362768	0.0164138
ENSG00000267402	TCF4-AS2	1.51855	-3.68321	1.35831	-2.71162	0.00669552	0.0956368
ENSG00000232021	LEF1-AS1	125.297	-3.67601	0.875832	-4.19716	2.7e-05	0.00308592
ENSG00000250909	AC138956.1	2.4526	-3.67108	1.11468	-3.29339	0.000989857	0.0316203
ENSG00000280560	LINC01374	67.9585	-3.6709	0.985945	-3.72323	0.000196694	0.0113845
ENSG00000263708	AC005695.2	0.91944	-3.66296	1.35287	-2.70755	0.00677811	NA
ENSG00000211930	IGHD3-3	34.578	-3.64908	1.1692	-3.12102	0.00180226	0.0452175
ENSG00000230408	AC007163.1	7.66444	-3.6452	0.74031	-4.92389	8.48e-07	0.000285138
ENSG00000169248	CXCL11	38.1104	3.64454	1.16191	3.13668	0.00170874	0.0438302
ENSG00000179253	AL162457.1	67.0951	3.63717	0.942803	3.85783	0.000114398	0.00799937
ENSG00000264985	AC124804.1	3.26173	-3.63548	1.4062	-2.58533	0.00972855	0.117231
ENSG00000267731	AC005332.3	78.0624	-3.63025	1.29136	-2.81119	0.0049358	0.0809313
ENSG00000145777	TSLP	59.6129	3.61284	0.968717	3.7295	0.000191856	0.011238
ENSG00000236671	PRKG1-AS1	3.81275	-3.61177	1.1726	-3.08014	0.00206907	0.0489294
ENSG00000183918	SH2D1A	1309.47	3.60172	0.923435	3.90035	9.61e-05	0.00722466
ENSG00000272568	AC005162.3	3.13007	-3.60156	1.38835	-2.59413	0.00948319	0.115785
ENSG00000244730	AC139451.1	18.0971	-3.59773	0.998186	-3.60427	0.000313031	0.0151986
ENSG00000166349	RAG1	1430.84	-3.59625	1.19749	-3.00315	0.00267202	0.0563089
ENSG00000120500	ARR3	5.72815	-3.59611	0.688735	-5.22133	1.78e-07	9.27e-05
ENSG00000278635	AC141557.2	12.7646	-3.59231	0.915086	-3.92565	8.65e-05	0.00672981
ENSG00000254777	AC022182.1	57.0744	-3.5825	0.653461	-5.48235	4.2e-08	2.73e-05
ENSG00000226455	AL121787.1	15.9464	-3.58043	1.0983	-3.25997	0.00111423	0.0339914
ENSG00000270487	AL355297.2	2.48993	-3.57212	1.37501	-2.59789	0.00937986	0.115147
ENSG00000137877	SPTBN5	12.1256	-3.57196	1.35347	-2.6391	0.00831262	0.108
ENSG00000282924	AC136428.4	4.84894	-3.57082	1.16641	-3.06136	0.00220334	0.0509391
ENSG00000227196	IGHD4-23	6.53072	-3.56815	1.13044	-3.15641	0.00159724	0.0420591
ENSG00000232022	FAAHP1	19.1632	-3.56523	1.21003	-2.94641	0.0032149	0.0631083
ENSG00000201942	RNA5SP363	1.63724	-3.56108	1.21149	-2.93943	0.00328814	0.0640727
ENSG00000229456	RLIMP1	53.9193	-3.54916	0.640019	-5.54539	2.93e-08	2.09e-05
ENSG00000266445	NARF-AS1	5.80488	-3.54617	1.1651	-3.04366	0.00233717	0.0525529
ENSG00000246863	AC012377.1	4.07217	-3.54591	1.14235	-3.10404	0.00190895	0.0466069
ENSG00000257086	AP001453.4	20.219	-3.54261	0.7263	-4.87761	1.07e-06	0.000333891
ENSG00000165078	CPA6	20.9439	3.54018	1.3506	2.62119	0.00876225	0.111208
ENSG00000163534	FCRL1	196.72	-3.5388	1.13509	-3.11764	0.00182307	0.0454148
ENSG00000200897	RF00284	3.33019	-3.51188	1.12097	-3.13291	0.00173083	0.0440299
ENSG00000207972	MIR638	2.25068	-3.50798	1.22665	-2.85982	0.00423887	0.0740131
ENSG00000070159	PTPN3	1.63023	-3.50718	1.20312	-2.91507	0.00355614	0.0664594
ENSG00000237641	AC073476.1	8.24007	-3.49968	0.796747	-4.39246	1.12e-05	0.00179007
ENSG00000233268	AL691449.1	1.98139	-3.49778	1.24892	-2.80064	0.00510019	0.0824065
ENSG00000177324	BEND2	94.6642	-3.49465	1.31918	-2.64911	0.00807048	0.106491
ENSG00000112182	BACH2	1138.66	-3.48427	0.816084	-4.2695	1.96e-05	0.00252295
ENSG00000171747	LGALS4	46.0107	-3.48093	1.20211	-2.89568	0.00378341	0.0691158
ENSG00000184389	A3GALT2	3.55798	-3.45052	0.79062	-4.36432	1.28e-05	0.00195146
ENSG00000263531	AC130324.1	10.4534	-3.44986	1.08108	-3.19113	0.00141719	0.0393381
ENSG00000122735	DNAI1	5.9487	-3.43856	1.27281	-2.70154	0.00690192	0.0971287
ENSG00000184414	IRS3P	12.9463	-3.43752	1.06341	-3.23253	0.00122698	0.0359713
ENSG00000254461	AP001107.4	13.1398	-3.41521	0.876804	-3.89507	9.82e-05	0.00728718
ENSG00000141748	ARL5C	26.1987	-3.41257	0.924858	-3.68983	0.000224403	0.0124139
ENSG00000239605	STPG4	5.55632	-3.41014	0.826667	-4.12517	3.7e-05	0.00381218
ENSG00000250254	PTTG2	3.81351	-3.39938	1.07159	-3.17226	0.00151256	0.040898
ENSG00000251414	AC138956.2	9.94489	-3.39707	1.12489	-3.01991	0.00252853	0.0545838
ENSG00000188277	C15orf62	26.5493	-3.3963	1.29615	-2.6203	0.00878524	0.111355
ENSG00000186868	MAPT	11.2084	-3.39355	1.17498	-2.88819	0.00387466	0.0702124
ENSG00000267344	AC003070.1	19.8387	-3.39147	0.906918	-3.73955	0.000184348	0.0109574
ENSG00000196549	MME	2030.63	-3.3832	0.81591	-4.14654	3.38e-05	0.00357466
ENSG00000182256	GABRG3	4.29523	-3.37712	1.20518	-2.80217	0.00507595	0.0823104
ENSG00000262663	AC087222.1	10.7041	-3.37409	1.15712	-2.91593	0.00354625	0.0664594
ENSG00000272668	AL590560.2	14.1301	-3.36402	1.13261	-2.97014	0.00297662	0.0601686
ENSG00000248592	TMEM110-MUSTN1	14.0798	-3.3602	0.871571	-3.85534	0.000115568	0.00802365
ENSG00000184925	LCN12	6.26737	-3.3556	0.79619	-4.21457	2.5e-05	0.0029259
ENSG00000272442	AL353588.1	1.6796	-3.3517	1.18547	-2.82732	0.004694	0.0787606
ENSG00000228315	GUSBP11	2.29298	-3.34412	1.14566	-2.91895	0.0035121	0.0662127
ENSG00000245812	LINC02202	80.5114	-3.34367	1.16949	-2.85908	0.00424866	0.0740756
ENSG00000277290	AC136475.10	14.6657	-3.3335	1.25842	-2.64895	0.00807413	0.106491
ENSG00000250075	AC104806.2	7.40604	-3.33249	0.878377	-3.79392	0.000148289	0.00950516
ENSG00000272836	AL022328.1	18.3844	-3.33056	0.89103	-3.73788	0.000185581	0.0109574
ENSG00000204532	ZSCAN5C	1.98427	3.33028	1.28738	2.58687	0.00968528	0.116956
ENSG00000243230	AC011005.4	1.42533	-3.32249	1.11062	-2.99157	0.00277546	NA
ENSG00000170807	LMOD2	14.2512	-3.31611	1.19315	-2.77929	0.00544785	0.0856104
ENSG00000263989	RN7SL615P	8.98692	-3.31528	0.99701	-3.32522	0.000883478	0.0292117
ENSG00000207392	SNORA20	1.58167	-3.31494	1.14376	-2.89828	0.00375218	0.0688225
ENSG00000251636	LINC01218	79.3102	3.29106	1.12298	2.93066	0.0033824	0.0647571
ENSG00000231102	AL035588.1	7.72325	-3.28727	0.894592	-3.6746	0.000238224	0.0129666
ENSG00000165905	LARGE2	280.548	-3.28524	1.13309	-2.89937	0.00373919	0.0688225
ENSG00000178752	ERFE	265.665	3.28021	0.935697	3.50563	0.000455532	0.0189669
ENSG00000169575	VPREB1	3451.81	-3.27999	1.03102	-3.18131	0.0014661	0.0402373
ENSG00000128422	KRT17	314.175	3.27051	1.12076	2.91811	0.00352157	0.0662795
ENSG00000252695	MIR2276	8.95563	-3.26681	1.15492	-2.8286	0.0046752	0.0786289
ENSG00000284727	AC116562.4	1.49078	-3.26674	1.11375	-2.9331	0.00335599	0.064614
ENSG00000211914	IGHD6-19	10.4731	-3.26447	0.914218	-3.57078	0.000355915	0.0162041
ENSG00000272702	AC010913.1	1.68619	-3.25473	1.22561	-2.6556	0.00791674	0.10504
ENSG00000238728	MIR1972-1	4.14381	-3.24794	1.03312	-3.14381	0.00166765	0.0431744
ENSG00000279554	AC130448.2	6.07179	-3.24693	1.15503	-2.81112	0.0049369	0.0809313
ENSG00000236234	AC091132.2	5.48983	-3.24479	1.0317	-3.14511	0.00166027	0.0430436
ENSG00000284299	AL590132.1	1.86883	3.23834	1.17375	2.75897	0.00579844	0.088687
ENSG00000230637	AL022324.1	7.20785	-3.23666	0.916333	-3.53219	0.000412133	0.0179527
ENSG00000153253	SCN3A	57.0038	-3.21655	1.04871	-3.06716	0.00216101	0.0503702
ENSG00000271100	AP000753.3	3.39277	-3.20967	0.993867	-3.22948	0.00124015	0.0362484
ENSG00000267117	AC010525.1	1.9653	-3.20918	0.925839	-3.46625	0.000527781	0.0208538
ENSG00000261253	AC137932.2	110.605	-3.19333	0.797033	-4.00652	6.16e-05	0.00532866
ENSG00000228541	AC093159.1	9.41733	3.1907	0.953562	3.34609	0.000819597	0.0277912
ENSG00000104899	AMH	82.6524	-3.18302	1.12845	-2.8207	0.00479189	0.0795807
ENSG00000230054	TEX53	2.162	-3.1663	1.21869	-2.59812	0.0093737	0.115119
ENSG00000244671	RN7SL280P	4.24918	-3.16514	1.21553	-2.60393	0.00921624	0.114208
ENSG00000106078	COBL	45.4656	-3.16212	1.18494	-2.66859	0.00761706	0.102657
ENSG00000232998	VPS13A-AS1	18.245	-3.15034	0.8496	-3.70803	0.000208881	0.0118551
ENSG00000279825	AC003957.1	8.50054	-3.13891	1.07667	-2.91539	0.0035524	0.0664594
ENSG00000243708	PLA2G4B	6.04015	-3.13855	0.848583	-3.69858	0.000216811	0.0121869
ENSG00000197768	STPG3	4.14285	-3.13843	1.02341	-3.06663	0.00216488	0.0503947
ENSG00000250910	AC097467.3	3.58053	-3.13396	1.02912	-3.04527	0.00232473	0.0523869
ENSG00000213872	AC092798.1	33.7883	-3.13216	0.916326	-3.41817	0.000630427	0.0235035
ENSG00000178199	ZC3H12D	600.755	-3.12027	0.788987	-3.95477	7.66e-05	0.00630748
ENSG00000258539	AC068896.1	50.4224	-3.1024	1.01368	-3.06052	0.00220956	0.0509976
ENSG00000221264	MIR1284	3.11126	-3.09667	1.04787	-2.9552	0.00312465	0.0622142
ENSG00000249138	AC084871.1	22.8703	-3.0931	1.06725	-2.89819	0.00375327	0.0688225
ENSG00000261592	AC010531.3	7.72593	-3.09058	0.745244	-4.14707	3.37e-05	0.00357466
ENSG00000236138	DUX4L26	8.01142	-3.08732	1.13384	-2.72288	0.00647154	0.0939675
ENSG00000239453	SIDT1-AS1	2.47238	-3.08537	1.108	-2.78463	0.00535889	0.0847592
ENSG00000269304	FKBP1AP1	4.56585	-3.08269	1.1138	-2.76773	0.00564484	0.0871596
ENSG00000275227	RF02271	5.19181	-3.07948	1.00641	-3.05986	0.00221438	0.0510442
ENSG00000187045	TMPRSS6	8.61183	-3.07822	1.05589	-2.91529	0.00355355	0.0664594
ENSG00000226091	LINC00937	38.1654	-3.062	0.854646	-3.58277	0.000339975	0.0160018
ENSG00000151715	TMEM45B	24.1538	-3.05209	0.973185	-3.13619	0.00171157	0.0438453
ENSG00000259483	AL355073.1	10.5038	-3.04941	1.01325	-3.00952	0.00261663	0.0555019
ENSG00000212615	RF00151	4.21224	-3.03433	0.918675	-3.30294	0.000956764	0.0309174
ENSG00000197558	SSPO	72.8667	-3.01692	1.00704	-2.99583	0.00273699	0.0571136
ENSG00000144407	PTH2R	466.718	3.01637	0.687796	4.38556	1.16e-05	0.00183778
ENSG00000240160	RN7SL263P	30.7229	-3.01348	0.842255	-3.57788	0.000346398	0.0160967
ENSG00000255856	AC069503.1	2.67192	-3.00817	1.05531	-2.85051	0.00436487	0.0755362
ENSG00000271730	AL390208.1	22.0966	-3.00471	0.915204	-3.28311	0.00102668	0.0323024
ENSG00000099957	P2RX6	7.62804	-2.9952	1.086	-2.75802	0.00581519	0.0887583
ENSG00000266049	AP001011.1	5.6896	-2.99159	1.00272	-2.98347	0.00285004	0.0584998
ENSG00000242094	FOXP1-IT1	50.0164	-2.98398	1.12175	-2.66011	0.00781163	0.104259
ENSG00000232493	RPL12P11	19.7913	-2.97479	1.00516	-2.95951	0.00308129	0.0615823
ENSG00000279796	AL133384.2	20.5231	-2.97088	1.13413	-2.61952	0.00880549	0.111515
ENSG00000254205	AC009686.1	5.3518	-2.96604	0.992072	-2.98974	0.00279214	0.0577372
ENSG00000236324	AL035634.1	23.348	-2.96523	0.777115	-3.81569	0.000135803	0.00894973
ENSG00000196796	NPIPB10P	2.00825	-2.96091	1.01753	-2.90992	0.00361526	0.067135
ENSG00000239576	COX6CP14	7.93927	-2.95815	1.01839	-2.90473	0.00367576	0.0679724
ENSG00000131650	KREMEN2	37.7196	-2.95073	0.722974	-4.08138	4.48e-05	0.00436186
ENSG00000125551	PLGLB2	2.01175	-2.94911	1.13354	-2.60168	0.00927672	0.114389
ENSG00000268903	AL627309.6	42.674	-2.9479	0.896982	-3.28646	0.00101454	0.0321016
ENSG00000171509	RXFP1	317.732	2.94159	1.06141	2.77139	0.00558172	0.0867499
ENSG00000241169	FO393419.2	4.74915	-2.9415	1.06974	-2.74973	0.00596448	0.089809
ENSG00000267769	AC011498.6	7.59853	-2.93521	0.932976	-3.14607	0.00165479	0.0430319
ENSG00000252060	RNA5SP464	3.59996	-2.93268	0.864354	-3.39292	0.000691526	0.0251714
ENSG00000263393	AC011825.2	4.90949	-2.9301	0.926001	-3.16425	0.00155485	0.041618
ENSG00000157388	CACNA1D	12.5309	-2.92921	1.04885	-2.79279	0.0052256	0.0833274
ENSG00000233523	PHBP5	3.68963	-2.90932	0.986139	-2.95021	0.00317555	0.062588
ENSG00000117016	RIMS3	762.435	-2.90723	0.859465	-3.38261	0.00071801	0.0257574
ENSG00000157613	CREB3L1	129.094	-2.8992	1.06922	-2.71151	0.00669775	0.0956368
ENSG00000250415	AC022113.2	7.06193	-2.89734	0.961347	-3.01383	0.0025797	0.0552396
ENSG00000248890	HHIP-AS1	339.928	-2.89236	0.979719	-2.95223	0.00315484	0.0624523
ENSG00000264548	AC132872.2	6.66694	-2.88593	1.08586	-2.65774	0.00786658	0.104734
ENSG00000107447	DNTT	19837.3	-2.88525	0.907839	-3.17815	0.00148219	0.0403676
ENSG00000211907	IGHD1-26	13.9551	-2.88365	0.945187	-3.05088	0.00228171	0.0518198
ENSG00000127325	BEST3	155.731	-2.8799	1.05527	-2.72907	0.00635129	0.0930535
ENSG00000265443	AC127024.3	4.17935	-2.87649	0.954593	-3.01332	0.0025841	0.0552934
ENSG00000179840	PIK3CD-AS1	427.659	-2.86458	0.483974	-5.91887	3.24e-09	3.64e-06
ENSG00000202290	RNA5SP37	19.4691	-2.86437	0.850383	-3.36833	0.000756262	0.0264728
ENSG00000101188	NTSR1	60.9891	-2.85866	0.845125	-3.38254	0.0007182	0.0257574
ENSG00000248242	AC004053.1	7.43511	-2.85029	0.877182	-3.24937	0.00115661	0.0348175
ENSG00000249626	AC024560.2	41.6371	-2.84593	0.86719	-3.28179	0.00103152	0.0323293
ENSG00000255031	AP002807.1	70.1141	-2.8445	0.626671	-4.53906	5.65e-06	0.00112268
ENSG00000265806	MIR4292	7.01675	-2.84057	0.842413	-3.37195	0.000746387	0.0264226
ENSG00000263813	MIR3679	8.3924	-2.83857	1.09819	-2.58476	0.00974457	0.117308
ENSG00000115602	IL1RL1	440.957	2.83756	0.5997	4.73163	2.23e-06	0.000561217
ENSG00000122121	XPNPEP2	115.575	-2.82614	0.846122	-3.34011	0.000837459	0.0281357
ENSG00000250361	GYPB	366.495	2.82421	1.07072	2.63768	0.00834757	0.1082
ENSG00000266320	MIR3909	4.62212	-2.82345	0.857635	-3.29213	0.000994304	0.031693
ENSG00000260971	AC119674.1	4.41273	-2.8194	1.0655	-2.64607	0.0081434	0.106821
ENSG00000281179	AC135068.8	6.2273	-2.81777	0.917024	-3.07274	0.00212107	0.0497565
ENSG00000264269	AC016866.1	23.3317	-2.81668	0.932267	-3.02132	0.00251672	0.0544092
ENSG00000136573	BLK	469.164	-2.81439	1.02031	-2.75837	0.00580895	0.0887095
ENSG00000271437	AL356423.1	45.9252	-2.81128	0.924603	-3.04053	0.00236163	0.0527334
ENSG00000273137	AL022328.2	22.9264	-2.81038	0.735987	-3.81852	0.000134257	0.0089045
ENSG00000221716	SNORA11	11.7523	-2.80308	0.996292	-2.81351	0.00490034	0.0806941
ENSG00000284638	AC005551.1	11.7129	-2.7871	1.06458	-2.61802	0.00884409	0.111893
ENSG00000270528	AC021171.1	1.48239	-2.78641	1.00256	-2.77929	0.00544776	NA
ENSG00000105409	ATP1A3	26.108	-2.78405	0.409634	-6.79644	1.07e-11	2.85e-08
ENSG00000270124	AC092127.2	20.444	2.78245	0.987785	2.81686	0.00484956	0.0803103
ENSG00000225195	AC078962.1	4.81978	-2.77871	1.02093	-2.72175	0.00649363	0.0940241
ENSG00000254208	AC011773.1	70.3506	-2.77765	0.647383	-4.29058	1.78e-05	0.0023784
ENSG00000270505	IGHV1OR15-1	6.16699	-2.7717	0.929882	-2.9807	0.00287591	0.0588142
ENSG00000235151	AC131097.4	342.138	2.76756	0.884032	3.13062	0.0017444	0.0442597
ENSG00000244265	SIAH2-AS1	29.808	-2.76333	0.727277	-3.79955	0.000144957	0.0093918
ENSG00000154864	PIEZO2	986.052	2.76299	0.719695	3.83912	0.000123477	0.00835441
ENSG00000275437	AL121832.3	26.9737	-2.7597	0.987749	-2.79393	0.00520714	0.0831691
ENSG00000104313	EYA1	23.9892	-2.75013	0.938245	-2.93114	0.00337719	0.0647571
ENSG00000171790	SLFNL1	90.0787	-2.7476	1.04197	-2.63693	0.00836601	0.108204
ENSG00000272949	AC093668.2	4.32984	-2.74161	0.695663	-3.94101	8.11e-05	0.00651554
ENSG00000155026	RSPH10B	3.53138	-2.73154	1.03672	-2.63479	0.00841888	0.108547
ENSG00000261916	AC027796.1	2.25659	-2.72711	0.974341	-2.79893	0.00512723	0.0824787
ENSG00000138795	LEF1	2363.16	-2.72075	0.923651	-2.94564	0.00322282	0.0631366
ENSG00000263033	AC007220.1	7.21777	-2.71454	0.988915	-2.74497	0.00605161	0.0901801
ENSG00000161544	CYGB	1514.74	-2.71196	0.874751	-3.10027	0.00193345	0.0468985
ENSG00000236188	PRKX-AS1	17.9541	-2.70628	0.956701	-2.82876	0.00467287	0.0786289
ENSG00000279336	AL353662.3	8.41292	-2.70215	0.876463	-3.08302	0.00204915	0.0485651
ENSG00000204580	DDR1	403.198	-2.70159	0.816486	-3.3088	0.000936964	0.0304972
ENSG00000049540	ELN	2001.42	2.69947	0.747801	3.60988	0.000306337	0.0150704
ENSG00000138395	CDK15	88.3513	2.68654	0.926788	2.89877	0.00374632	0.0688225
ENSG00000121742	GJB6	695.368	-2.68524	1.02118	-2.62955	0.00854976	0.109558
ENSG00000186648	CARMIL3	20.3362	-2.68486	1.01503	-2.64511	0.0081665	0.106944
ENSG00000277892	MIR6746	7.80899	-2.6801	0.921341	-2.90891	0.00362687	0.0672225
ENSG00000187730	GABRD	85.2345	2.67976	0.919222	2.91525	0.00355407	0.0664594
ENSG00000164520	RAET1E	16.4611	2.67027	1.03426	2.58183	0.00982791	0.117768
ENSG00000177455	CD19	1011.82	-2.66805	0.961949	-2.77359	0.00554421	0.0866123
ENSG00000267255	AC011498.3	29.6182	-2.66513	0.980989	-2.71678	0.00659211	0.0946126
ENSG00000279930	AL032819.2	11.1235	-2.66344	0.954285	-2.79103	0.0052541	0.0836906
ENSG00000228938	SNRPD2P1	13.291	-2.66226	0.596299	-4.46465	8.02e-06	0.00137557
ENSG00000246214	AC022113.1	61.63	-2.66001	0.782558	-3.39912	0.000676035	0.0247617
ENSG00000226160	AC137499.1	3.52167	2.65594	1.01761	2.60998	0.00905468	0.113163
ENSG00000196781	TLE1	3407.21	-2.64943	0.687824	-3.8519	0.000117204	0.00806336
ENSG00000269981	AL627309.7	29.5623	-2.64894	0.916886	-2.88906	0.00386398	0.0701123
ENSG00000237940	LINC01238	57.9541	-2.64551	0.907101	-2.91645	0.00354042	0.0664594
ENSG00000248734	AC008906.1	31.4241	-2.6451	0.936649	-2.824	0.00474277	0.0793058
ENSG00000184361	SPATA32	8.17704	-2.63821	0.846671	-3.11598	0.00183335	0.0454897
ENSG00000254649	AP003086.3	16.5271	-2.63555	0.707207	-3.7267	0.000194001	0.0112957
ENSG00000172771	EFCAB12	27.9068	-2.6286	0.9698	-2.71046	0.00671902	0.0957068
ENSG00000186174	BCL9L	160.472	-2.62369	0.581742	-4.51006	6.48e-06	0.00119621
ENSG00000188710	QRFP	15.9935	2.62338	0.947207	2.76959	0.00561263	0.0867998
ENSG00000259384	GH1	51.7501	-2.62316	0.852747	-3.07612	0.00209711	0.0493529
ENSG00000214140	PRCD	188.873	-2.61495	0.915972	-2.85483	0.00430596	0.074827
ENSG00000238121	LINC00426	823.747	-2.61371	0.516188	-5.06348	4.12e-07	0.000174384
ENSG00000231587	SNORD62B	13.6276	-2.60884	0.805364	-3.23933	0.00119811	0.0354092
ENSG00000260051	AL031600.1	63.5307	-2.6072	0.786104	-3.31661	0.000911177	0.0298574
ENSG00000231528	FAM225A	13.4708	2.58276	0.969012	2.66536	0.00769071	0.103274
ENSG00000211911	IGHD3-22	10.9393	-2.57972	0.901409	-2.86188	0.00421141	0.0737982
ENSG00000170421	KRT8	1317.21	2.57806	0.71511	3.60512	0.000312006	0.0151986
ENSG00000228727	SAPCD1	29.7794	-2.57638	0.963552	-2.67384	0.00749879	0.101927
ENSG00000213073	AL353625.1	32.3959	-2.57255	0.850184	-3.02587	0.00247918	0.0540372
ENSG00000280198	AC087163.3	35.9101	-2.56989	0.786823	-3.26616	0.00109017	0.0335064
ENSG00000268047	AC018766.1	5.58455	-2.56831	0.782954	-3.28028	0.00103704	0.032369
ENSG00000115085	ZAP70	1677.55	-2.5681	0.65148	-3.94194	8.08e-05	0.00650798
ENSG00000244476	ERVFRD-1	149.559	2.55978	0.68489	3.7375	0.000185857	0.0109574
ENSG00000244124	ATP1B3-AS1	8.2207	-2.55924	0.906516	-2.82316	0.00475527	0.0794239
ENSG00000274380	MIR6801	1.76202	-2.55885	0.983191	-2.6026	0.00925195	0.114314
ENSG00000279275	AP002505.2	97.192	-2.55856	0.637657	-4.01245	6.01e-05	0.00525799
ENSG00000277675	AC211486.5	5.70296	-2.55422	0.863403	-2.95831	0.00309327	0.0617283
ENSG00000171621	SPSB1	1651.27	2.55076	0.801899	3.1809	0.00146817	0.0402563
ENSG00000243696	AC006254.1	14.0426	-2.55039	0.803517	-3.17403	0.00150338	0.0408006
ENSG00000225822	UBXN7-AS1	114.219	-2.54966	0.580231	-4.39421	1.11e-05	0.00178547
ENSG00000168386	FILIP1L	303.261	2.54712	0.798418	3.19021	0.00142168	0.0394039
ENSG00000204165	CXorf65	1.38681	-2.54605	0.941775	-2.70346	0.00686227	NA
ENSG00000211688	TRGJP2	54.6809	2.54309	0.555722	4.57619	4.74e-06	0.00099263
ENSG00000272588	AC139887.4	35.7858	-2.53863	0.668222	-3.79908	0.000145236	0.0093918
ENSG00000263657	AC023389.1	22.8953	-2.53611	0.656951	-3.86042	0.000113192	0.00793405
ENSG00000232218	AL021937.2	8.54273	-2.53356	0.747757	-3.38821	0.000703508	0.0254093
ENSG00000254996	ANKHD1-EIF4EBP3	42.1347	-2.53246	0.689857	-3.67099	0.000241615	0.0130539
ENSG00000130653	PNPLA7	1455.25	-2.52868	0.444296	-5.69142	1.26e-08	1.12e-05
ENSG00000130518	IQCN	187.632	-2.52631	0.635101	-3.97781	6.96e-05	0.00581966
ENSG00000229111	MED4-AS1	10.2853	-2.52579	0.619773	-4.07534	4.59e-05	0.00445882
ENSG00000162490	DRAXIN	38.2248	-2.52457	0.869529	-2.90338	0.00369159	0.0680832
ENSG00000239686	AL158801.1	27.0771	-2.52035	0.729398	-3.45539	0.000549502	0.0213867
ENSG00000279179	AL662907.2	45.0931	-2.51721	0.710397	-3.54339	0.00039502	0.0173886
ENSG00000166405	RIC3	75.343	-2.51379	0.761304	-3.30195	0.00096016	0.0309421
ENSG00000180610	ZBTB12BP	28.9134	-2.51125	0.783846	-3.20375	0.00135648	0.038234
ENSG00000105369	CD79A	5026.33	-2.50807	0.790694	-3.17198	0.00151404	0.0409
ENSG00000258461	AC012651.1	15.4255	-2.50474	0.851471	-2.94166	0.00326459	0.0638266
ENSG00000007968	E2F2	2773.05	-2.50461	0.555544	-4.50838	6.53e-06	0.00119621
ENSG00000246985	SOCS2-AS1	825.273	-2.48827	0.461046	-5.39701	6.78e-08	4.13e-05
ENSG00000213304	AC008481.2	11.7366	-2.48547	0.787361	-3.15671	0.00159562	0.0420545
ENSG00000266709	AC005224.4	141.733	-2.48178	0.738582	-3.36019	0.000778877	0.0269418
ENSG00000254995	STX16-NPEPL1	70.9887	-2.47707	0.612119	-4.04672	5.19e-05	0.0047442
ENSG00000236871	LINC00106	37.365	-2.47022	0.496067	-4.9796	6.37e-07	0.000221704
ENSG00000250506	CDK3	8.22163	-2.46994	0.714312	-3.4578	0.000544614	0.0212684
ENSG00000223609	HBD	9726.42	2.46527	0.867148	2.84296	0.00446968	0.0764448
ENSG00000182272	B4GALNT4	13.5002	-2.45881	0.892031	-2.75642	0.00584374	0.0888693
ENSG00000231393	AL357874.2	51.3381	-2.45548	0.893421	-2.7484	0.00598868	0.0899041
ENSG00000251139	AC084871.2	68.1167	-2.45465	0.540395	-4.54232	5.56e-06	0.00112154
ENSG00000258034	AC012157.1	7.84315	-2.45364	0.880185	-2.78764	0.00530933	0.084332
ENSG00000004777	ARHGAP33	453.748	-2.44767	0.379633	-6.44747	1.14e-10	2.04e-07
ENSG00000273724	AC106782.5	10.7403	-2.44129	0.778841	-3.13451	0.00172139	0.043935
ENSG00000174038	C9orf131	39.1333	-2.43646	0.675495	-3.60693	0.000309841	0.0151698
ENSG00000188523	CFAP77	4.32183	-2.42589	0.901416	-2.6912	0.00711961	0.0988124
ENSG00000267366	AP005131.2	14.7692	-2.42019	0.830054	-2.9157	0.00354893	0.0664594
ENSG00000252242	RNU7-115P	4.43883	-2.41974	0.842292	-2.8728	0.00406846	0.072334
ENSG00000198336	MYL4	534.346	2.41745	0.848535	2.84897	0.00438611	0.0757169
ENSG00000101665	SMAD7	1374.86	-2.41659	0.71548	-3.37758	0.00073127	0.0261299
ENSG00000224451	ATP5PBP1	18.1256	-2.40986	0.928971	-2.59412	0.00948336	0.115785
ENSG00000008516	MMP25	548.858	-2.40825	0.733974	-3.28111	0.00103398	0.032338
ENSG00000279608	AL353795.3	41.123	-2.39898	0.651917	-3.67989	0.000233336	0.0127387
ENSG00000228158	TLE1P1	41.7671	-2.39544	0.72591	-3.29991	0.000967164	0.0310993
ENSG00000258177	AC008149.1	39.9353	-2.39332	0.679905	-3.52007	0.000431425	0.0183821
ENSG00000159588	CCDC17	51.5357	-2.39201	0.858544	-2.78612	0.00533429	0.0845738
ENSG00000243979	AC087752.1	1.84061	-2.39114	0.915182	-2.61275	0.0089818	0.112722
ENSG00000279283	AC131009.4	76.0812	-2.38857	0.707568	-3.37575	0.000736149	0.0261948
ENSG00000171219	CDC42BPG	164.564	-2.38799	0.533665	-4.4747	7.65e-06	0.00133131
ENSG00000241769	LINC00893	99.3368	-2.37996	0.552403	-4.30838	1.64e-05	0.00226742
ENSG00000099840	IZUMO4	25.7259	-2.37327	0.884752	-2.68242	0.00730926	0.10049
ENSG00000018280	SLC11A1	4011.08	-2.3684	0.852135	-2.77937	0.00544642	0.0856104
ENSG00000141449	GREB1L	23.1327	-2.36539	0.623804	-3.79188	0.000149511	0.0095624
ENSG00000257242	LINC01619	24.7968	-2.36297	0.780431	-3.02778	0.00246356	0.0539381
ENSG00000026036	RTEL1-TNFRSF6B	100.715	-2.36236	0.717106	-3.29429	0.0009867	0.0315884
ENSG00000160886	LY6K	37.8786	2.35738	0.839448	2.80825	0.00498121	0.0814539
ENSG00000284707	AC079781.5	159.165	-2.35507	0.562997	-4.1831	2.88e-05	0.00320811
ENSG00000269534	AC011466.3	10.7063	-2.35507	0.884808	-2.66167	0.00777535	0.103964
ENSG00000174944	P2RY14	371.203	-2.35373	0.79437	-2.96302	0.00304637	0.0612002
ENSG00000230715	AC018638.2	73.1248	-2.35229	0.608013	-3.86882	0.000109365	0.00779663
ENSG00000206675	RNU6-32P	9.63666	-2.34977	0.749	-3.13722	0.00170561	0.0438302
ENSG00000112077	RHAG	1871.66	2.34754	0.854031	2.74878	0.00598182	0.0898933
ENSG00000164362	TERT	324.141	-2.34118	0.8137	-2.87721	0.00401213	0.0717794
ENSG00000274038	AC007014.2	63.1623	-2.33898	0.613215	-3.81429	0.000136576	0.00897073
ENSG00000165917	RAPSN	10.058	-2.33892	0.730878	-3.20015	0.00137356	0.0385295
ENSG00000110046	ATG2A	1546.55	-2.3371	0.435012	-5.37249	7.77e-08	4.54e-05
ENSG00000258086	AC079313.1	10.7295	-2.33697	0.899772	-2.59729	0.00939626	0.115299
ENSG00000258857	AL359397.1	5.93717	-2.33596	0.835158	-2.79703	0.00515746	0.0827408
ENSG00000007312	CD79B	6811.61	-2.33547	0.652807	-3.57758	0.000346796	0.0160967
ENSG00000233845	AC093732.1	24.6832	-2.33521	0.851325	-2.74302	0.00608764	0.0904604
ENSG00000232938	RPL23AP87	14.8514	2.33138	0.888435	2.62414	0.00868687	0.110491
ENSG00000175727	MLXIP	17617.3	-2.33138	0.360986	-6.45835	1.06e-10	2.04e-07
ENSG00000227191	TRGC2	698.121	2.32972	0.491224	4.74268	2.11e-06	0.000536047
ENSG00000170482	SLC23A1	145.333	-2.32788	0.733638	-3.17306	0.00150841	0.0408564
ENSG00000221510	MIR548O	7.48849	-2.32729	0.669117	-3.47815	0.000504882	0.0202229
ENSG00000197816	CCDC180	26.203	-2.32364	0.873507	-2.66012	0.00781123	0.104259
ENSG00000224746	AC015987.1	38.3774	-2.31131	0.748103	-3.08956	0.00200452	0.0479854
ENSG00000244332	AL138759.1	15.7417	-2.30978	0.772653	-2.98942	0.0027951	0.0577372
ENSG00000108375	RNF43	185.496	-2.30466	0.55469	-4.15486	3.25e-05	0.00348492
ENSG00000179242	CDH4	914.365	2.2995	0.745901	3.08284	0.00205034	0.0485651
ENSG00000261490	AC005674.2	46.3827	-2.29937	0.796844	-2.8856	0.00390666	0.0706608
ENSG00000123836	PFKFB2	718.364	-2.29925	0.533886	-4.30664	1.66e-05	0.00227457
ENSG00000196517	SLC6A9	172.878	2.29876	0.810525	2.83614	0.00456622	0.0775515
ENSG00000229855	AC008568.1	96.9996	2.29773	0.73061	3.14495	0.00166113	0.0430436
ENSG00000250575	AL732372.3	3.88314	-2.29506	0.638741	-3.5931	0.000326762	0.0156572
ENSG00000248544	AC008676.1	25.4055	-2.29173	0.814293	-2.81438	0.00488715	0.0806131
ENSG00000269235	ZNF350-AS1	21.0754	-2.29147	0.630903	-3.63204	0.000281189	0.0144191
ENSG00000234028	AC062029.1	127.053	-2.28494	0.55752	-4.09841	4.16e-05	0.00414991
ENSG00000265527	MIR5690	25.6652	-2.2838	0.783988	-2.91306	0.00357909	0.0666825
ENSG00000261654	AL360270.2	47.7857	-2.28208	0.728392	-3.13304	0.00173008	0.0440299
ENSG00000230322	AL136320.1	52.8802	-2.28017	0.599017	-3.80652	0.000140934	0.00915413
ENSG00000102935	ZNF423	198.74	-2.27329	0.876579	-2.59336	0.00950422	0.115846
ENSG00000226800	CACTIN-AS1	12.1039	-2.26676	0.772326	-2.93497	0.00333576	0.0645482
ENSG00000270028	AC079315.1	9.50212	-2.26659	0.755098	-3.00172	0.00268459	0.0565164
ENSG00000252391	RNU6-638P	6.42525	-2.26475	0.868292	-2.60828	0.00909987	0.113445
ENSG00000112559	MDFI	352.807	2.25134	0.857346	2.62594	0.00864099	0.110074
ENSG00000105971	CAV2	1242.06	2.2512	0.820145	2.74488	0.00605335	0.0901801
ENSG00000130758	MAP3K10	111.947	-2.25087	0.474297	-4.7457	2.08e-06	0.000532764
ENSG00000228485	GRK5-IT1	17.4556	-2.24693	0.779721	-2.88171	0.00395518	0.0711422
ENSG00000237499	AL357060.1	508.16	-2.24286	0.275806	-8.13202	4.22e-16	4.11e-12
ENSG00000235016	SEMA3F-AS1	286.196	-2.23966	0.630664	-3.55128	0.000383369	0.0170325
ENSG00000171119	NRTN	71.8388	-2.2396	0.828058	-2.70464	0.00683784	0.0965989
ENSG00000102886	GDPD3	11.792	-2.23873	0.708299	-3.16072	0.00157381	0.0417566
ENSG00000100652	SLC10A1	18.1602	-2.23789	0.803543	-2.78502	0.00535238	0.0847021
ENSG00000234630	AC245060.2	174.489	-2.23102	0.634476	-3.51631	0.000437582	0.0185563
ENSG00000246339	EXTL3-AS1	30.3788	-2.22826	0.835003	-2.66856	0.0076177	0.102657
ENSG00000272384	AC016405.3	28.8958	-2.22822	0.800588	-2.78323	0.00538202	0.0849412
ENSG00000184441	AP001062.1	91.1859	-2.21942	0.53123	-4.1779	2.94e-05	0.00323297
ENSG00000144749	LRIG1	1806.24	-2.21612	0.612253	-3.61961	0.000295045	0.0148682
ENSG00000262075	AC174065.1	36.0456	-2.21109	0.745943	-2.96415	0.00303523	0.0611308
ENSG00000248714	AC091180.2	17.5071	-2.20854	0.656147	-3.36592	0.000762876	0.0266724
ENSG00000285080	AC068724.3	7.0519	-2.2049	0.674933	-3.26685	0.00108753	0.0334859
ENSG00000227502	LINC01268	380.905	2.19932	0.764454	2.87698	0.00401497	0.0717794
ENSG00000188305	PEAK3	179.085	-2.19846	0.631553	-3.48104	0.000499462	0.0201919
ENSG00000254812	AC067930.3	8.57345	-2.1978	0.845472	-2.59949	0.00933613	0.114899
ENSG00000271895	AL109811.3	63.3849	-2.19095	0.542743	-4.0368	5.42e-05	0.0049041
ENSG00000135069	PSAT1	371.427	2.19064	0.599199	3.65595	0.000256234	0.0135011
ENSG00000284138	ATP6V0CP4	6.40631	-2.18954	0.708371	-3.09095	0.00199519	0.0479166
ENSG00000104267	CA2	10547.2	2.18333	0.758898	2.87697	0.00401517	0.0717794
ENSG00000264741	MIR4505	17.548	-2.181	0.626317	-3.48226	0.0004972	0.0201561
ENSG00000271360	AL512631.2	58.9486	-2.18086	0.59105	-3.68982	0.000224416	0.0124139
ENSG00000164938	TP53INP1	18701	-2.17775	0.73952	-2.94482	0.00323144	0.0632631
ENSG00000272669	AL021707.6	40.0099	-2.1758	0.57747	-3.76782	0.000164678	0.010208
ENSG00000204681	GABBR1	373.241	-2.17504	0.640864	-3.39392	0.000688994	0.0251418
ENSG00000230701	FBXW4P1	369.868	-2.17221	0.764401	-2.84172	0.00448708	0.0765632
ENSG00000261226	AC092384.3	76.7023	-2.1721	0.772841	-2.81054	0.0049458	0.0809864
ENSG00000271200	AC099791.2	16.2346	-2.17199	0.719953	-3.01685	0.00255413	0.0548829
ENSG00000159433	STARD9	494.22	-2.17091	0.721613	-3.00841	0.00262619	0.0556237
ENSG00000227383	AL353662.1	14.2551	-2.17042	0.737921	-2.94127	0.0032687	0.0638643
ENSG00000139890	REM2	62.3566	-2.16821	0.693592	-3.12606	0.00177163	0.0447563
ENSG00000280143	AP000892.3	3.38794	-2.16562	0.790968	-2.73793	0.0061827	0.0913269
ENSG00000229999	AL022238.2	8.82661	-2.16513	0.742447	-2.91621	0.00354309	0.0664594
ENSG00000250734	AL391335.1	5.91877	-2.16147	0.781114	-2.76716	0.00565463	0.0872646
ENSG00000273188	AL022328.3	87.7445	-2.16145	0.583702	-3.70301	0.000213058	0.0120687
ENSG00000266559	MIR4530	19.6436	-2.16138	0.644992	-3.35101	0.000805165	0.0273972
ENSG00000279416	AC099689.1	31.7219	-2.16128	0.833831	-2.59199	0.00954233	0.116165
ENSG00000168970	JMJD7-PLA2G4B	96.0966	-2.15815	0.705705	-3.05815	0.00222708	0.0512159
ENSG00000264112	AC015813.1	312.026	-2.15758	0.561887	-3.83989	0.00012309	0.00834754
ENSG00000165072	MAMDC2	505.989	2.14455	0.675912	3.17283	0.00150963	0.0408564
ENSG00000225963	AC009950.1	13.8008	-2.14421	0.781227	-2.74467	0.00605719	0.0901914
ENSG00000131969	ABHD12B	295.987	2.14251	0.729164	2.93832	0.00329999	0.0642181
ENSG00000281344	HELLPAR	106.534	-2.14039	0.715841	-2.99003	0.00278951	0.0577372
ENSG00000229502	AL391863.1	61.7431	-2.13944	0.768917	-2.7824	0.00539577	0.0850663
ENSG00000064989	CALCRL	1555.13	2.13743	0.78332	2.72868	0.00635891	0.0930719
ENSG00000259118	AL139022.1	51.2086	-2.13679	0.63606	-3.35941	0.000781086	0.0269544
ENSG00000176438	SYNE3	1531.3	-2.13487	0.449028	-4.75442	1.99e-06	0.000517504
ENSG00000277476	AC005332.6	36.8166	-2.11668	0.677061	-3.12627	0.00177039	0.0447563
ENSG00000164675	IQUB	7.53382	-2.11384	0.650405	-3.25003	0.00115393	0.0348072
ENSG00000182685	BRICD5	40.2327	-2.11068	0.804928	-2.6222	0.00873631	0.110975
ENSG00000240553	AL031428.1	28.6418	-2.10509	0.793525	-2.65283	0.00798193	0.105711
ENSG00000266714	MYO15B	2274.66	-2.10304	0.434073	-4.84489	1.27e-06	0.000366339
ENSG00000187726	DNAJB13	15.4025	-2.09828	0.715099	-2.93425	0.00334358	0.0645746
ENSG00000228261	AL162742.1	41.8936	-2.0975	0.633563	-3.31064	0.000930815	0.0303309
ENSG00000259618	AC012170.3	5.05175	-2.09313	0.776824	-2.69448	0.00704992	0.0981715
ENSG00000279649	AC020978.9	36.1233	-2.0903	0.761829	-2.7438	0.00607332	0.0903395
ENSG00000230415	LINC01786	17.6114	-2.08635	0.491712	-4.24303	2.21e-05	0.00270821
ENSG00000201428	RN7SKP71	5.40053	-2.07661	0.798206	-2.6016	0.00927898	0.114389
ENSG00000233538	AC017104.3	64.4843	-2.07437	0.76061	-2.72725	0.00638651	0.0933356
ENSG00000178809	TRIM73	59.8483	-2.06518	0.455673	-4.53216	5.84e-06	0.00112268
ENSG00000196668	LINC00173	43.851	-2.06514	0.749715	-2.75457	0.00587691	0.0891881
ENSG00000155428	TRIM74	63.2532	-2.0602	0.472905	-4.35647	1.32e-05	0.00197491
ENSG00000129167	TPH1	13.9586	-2.05993	0.790501	-2.60585	0.00916456	0.113842
ENSG00000177943	MAMDC4	87.6714	-2.05439	0.779656	-2.635	0.00841379	0.108529
ENSG00000233974	AC138951.1	91.286	-2.05346	0.745201	-2.75558	0.00585884	0.0890258
ENSG00000160323	ADAMTS13	99.6653	-2.05301	0.743782	-2.76023	0.00577599	0.0884835
ENSG00000273142	AC073335.2	58.3797	-2.05274	0.793206	-2.58791	0.00965602	0.116871
ENSG00000263126	AC040162.3	15.747	-2.05223	0.611273	-3.3573	0.000787085	0.0270655
ENSG00000213958	KRT18P29	9.18212	2.04808	0.745392	2.74765	0.00600239	0.0899252
ENSG00000254285	KRT8P3	31.6518	2.04802	0.727361	2.81569	0.00486728	0.0804528
ENSG00000159958	TNFRSF13C	202.937	-2.04796	0.71444	-2.86652	0.00415014	0.073119
ENSG00000222351	RNY1P15	8.44269	-2.04507	0.765331	-2.67214	0.00753686	0.10213
ENSG00000108797	CNTNAP1	60.9454	-2.04475	0.635949	-3.21527	0.00130321	0.0373814
ENSG00000246922	UBAP1L	50.6966	-2.04473	0.766232	-2.66855	0.00761786	0.102657
ENSG00000281112	AL355480.2	10.2904	-2.04371	0.757908	-2.69651	0.00700695	0.097853
ENSG00000275110	MIR6087	3.50401	-2.04354	0.774474	-2.63861	0.00832455	0.108074
ENSG00000108465	CDK5RAP3	400.128	-2.04132	0.646778	-3.15614	0.0015987	0.0420597
ENSG00000257489	AC010203.1	88.811	-2.04089	0.481295	-4.24042	2.23e-05	0.00271708
ENSG00000275070	RF00017	13.5126	-2.03973	0.58666	-3.47686	0.000507328	0.0202301
ENSG00000075826	SEC31B	998.364	-2.03704	0.69382	-2.93598	0.00332497	0.0644894
ENSG00000229473	RGS17P1	38.1642	-2.03595	0.55136	-3.69259	0.000221979	0.0123603
ENSG00000179532	DNHD1	391.176	-2.03443	0.406717	-5.00209	5.67e-07	0.000211544
ENSG00000120833	SOCS2	7443.44	-2.02562	0.505278	-4.00892	6.1e-05	0.00529035
ENSG00000269737	AL691432.1	87.5885	-2.02378	0.665063	-3.043	0.00234234	0.0525529
ENSG00000250635	CXXC5-AS1	54.7457	-2.02032	0.653498	-3.09154	0.0019912	0.0478625
ENSG00000229873	OGFR-AS1	26.6615	-2.01565	0.482914	-4.17393	2.99e-05	0.00327755
ENSG00000235262	KDM5C-IT1	11.3401	-2.01497	0.756716	-2.66279	0.00774962	0.103843
ENSG00000255547	RPA2P3	12.9551	2.0146	0.600258	3.35622	0.000790143	0.0271344
ENSG00000280063	AC012676.5	67.0585	-2.013	0.446454	-4.50887	6.52e-06	0.00119621
ENSG00000253878	AC087752.3	79.4179	-2.01183	0.67499	-2.98054	0.00287743	0.0588142
ENSG00000250215	CIR1P2	3.34149	2.0116	0.762972	2.63653	0.00837594	0.108204
ENSG00000122188	LAX1	468.488	2.00885	0.650591	3.08772	0.00201695	0.0480842
ENSG00000241666	AL031733.2	496.014	-2.00724	0.703502	-2.85321	0.00432806	0.0751364
ENSG00000275092	AL031710.2	41.5442	-2.00406	0.688892	-2.90911	0.00362464	0.0672225
ENSG00000242472	IGHJ5	110.35	-2.00338	0.718196	-2.78946	0.00527956	0.0840045
ENSG00000278869	BX539320.1	135.219	-2.00207	0.611647	-3.27324	0.00106321	0.0329202
ENSG00000236991	EDRF1-AS1	24.8445	-2.00152	0.74838	-2.67447	0.00748482	0.10185
ENSG00000171208	NETO2	622.185	1.99934	0.666642	2.99913	0.00270754	0.0568526
ENSG00000092529	CAPN3	28.9914	-1.99908	0.514402	-3.88623	0.000101815	0.0074858
ENSG00000212719	C17orf51	69.3066	1.9942	0.598205	3.33364	0.000857165	0.0285679
ENSG00000187144	SPATA21	43.2542	-1.9909	0.560624	-3.55123	0.000383435	0.0170325
ENSG00000173209	AHSA2P	1770.63	-1.9893	0.408997	-4.86385	1.15e-06	0.000346907
ENSG00000069696	DRD4	8.65176	-1.98575	0.709928	-2.79711	0.00515616	0.0827408
ENSG00000227370	AC254562.1	6.6173	-1.98023	0.763413	-2.59392	0.0094888	0.115803
ENSG00000091592	NLRP1	4127	-1.97422	0.456247	-4.32709	1.51e-05	0.00215321
ENSG00000126705	AHDC1	573.139	-1.97158	0.426276	-4.62512	3.74e-06	0.000829006
ENSG00000130787	HIP1R	1841.83	-1.96754	0.417442	-4.71333	2.44e-06	0.000583859
ENSG00000230724	LINC01001	36.7635	-1.96669	0.465101	-4.22852	2.35e-05	0.00282953
ENSG00000164106	SCRG1	15.3184	-1.96615	0.750818	-2.61868	0.00882705	0.111739
ENSG00000125089	SH3TC1	9629.36	-1.96161	0.499851	-3.92439	8.7e-05	0.00672981
ENSG00000163734	CXCL3	3444.36	1.96126	0.689446	2.84469	0.0044454	0.0761292
ENSG00000279765	AC013394.1	120.717	-1.95997	0.509263	-3.84865	0.00011877	0.00813053
ENSG00000171877	FRMD5	195.162	-1.95741	0.572905	-3.41663	0.000634011	0.023607
ENSG00000261556	SMG1P7	60.2279	-1.9554	0.726577	-2.69126	0.00711833	0.0988124
ENSG00000184792	OSBP2	1997.11	1.95181	0.709923	2.74932	0.00597187	0.089809
ENSG00000078814	MYH7B	61.6495	-1.95132	0.640382	-3.04712	0.00231044	0.0522288
ENSG00000214359	RPL18P10	32.3353	-1.94989	0.695938	-2.80182	0.00508145	0.0823314
ENSG00000164932	CTHRC1	161.472	1.94844	0.652246	2.98727	0.00281477	0.0579386
ENSG00000205560	CPT1B	15.5778	-1.94086	0.669464	-2.89913	0.00374196	0.0688225
ENSG00000225568	AC093155.1	12.215	1.94072	0.640921	3.02802	0.00246161	0.0539358
ENSG00000163126	ANKRD23	21.1336	-1.93811	0.672329	-2.88268	0.00394312	0.0710563
ENSG00000256116	AP001453.1	4.26903	-1.93541	0.57772	-3.35009	0.000807862	0.027457
ENSG00000205791	LOH12CR2	44.1068	1.93234	0.574578	3.36306	0.000770833	0.0268017
ENSG00000185950	IRS2	5497.77	-1.93187	0.419024	-4.6104	4.02e-06	0.000876648
ENSG00000225889	AC012368.1	143.851	-1.93112	0.668365	-2.88931	0.00386086	0.0701123
ENSG00000233806	LINC01237	78.2267	-1.92863	0.714925	-2.69767	0.0069826	0.0976061
ENSG00000239503	MARK2P8	85.6259	-1.92283	0.698395	-2.75322	0.00590127	0.0894649
ENSG00000269937	AC093525.7	34.0785	-1.92269	0.700031	-2.74658	0.00602206	0.0899892
ENSG00000267162	SDHDP1	8.02398	1.91613	0.511631	3.74514	0.000180294	0.0108715
ENSG00000279689	AC022400.9	22.3215	-1.91564	0.668125	-2.8672	0.00414128	0.0730756
ENSG00000284981	AC093668.3	2.66476	-1.91487	0.67884	-2.8208	0.00479039	0.0795807
ENSG00000229106	BTBD6P1	29.5023	-1.91108	0.585031	-3.26663	0.00108836	0.0334859
ENSG00000129204	USP6	90.9863	-1.90751	0.717676	-2.65791	0.00786279	0.104734
ENSG00000161912	ADCY10P1	79.037	-1.90628	0.67966	-2.80475	0.00503557	0.0818789
ENSG00000279691	AC113410.3	35.3874	-1.90494	0.599223	-3.17901	0.00147778	0.0403676
ENSG00000243302	AC018638.4	122.491	-1.90023	0.565105	-3.36262	0.000772078	0.0268017
ENSG00000260528	FAM157C	41.6862	-1.89809	0.722131	-2.62846	0.00857723	0.109694
ENSG00000184937	WT1	322.085	1.89336	0.727211	2.60359	0.00922527	0.114208
ENSG00000109771	LRP2BP	59.0997	-1.88833	0.532623	-3.54534	0.000392108	0.0172865
ENSG00000205238	SPDYE2	139.935	-1.88826	0.533506	-3.53933	0.00040114	0.0176314
ENSG00000267246	AC091132.6	18.8972	-1.88695	0.536673	-3.51601	0.00043808	0.0185563
ENSG00000227379	PPIAP2	54.8245	-1.88551	0.556006	-3.39117	0.000695961	0.0252419
ENSG00000279520	AC093525.8	95.0801	-1.87817	0.662074	-2.8368	0.00455684	0.0774372
ENSG00000261872	AC002558.2	15.3314	-1.87582	0.685202	-2.73762	0.00618863	0.0913269
ENSG00000253200	AC037459.3	64.8691	-1.87475	0.611009	-3.06829	0.0021529	0.0502905
ENSG00000236570	RAD23BP1	10.8023	1.87408	0.657692	2.84948	0.00437913	0.0756524
ENSG00000281195	AC007878.1	62.6358	-1.87358	0.707554	-2.64796	0.00809781	0.106491
ENSG00000265298	AC132812.1	80.9903	-1.87326	0.483943	-3.87084	0.000108461	0.00777014
ENSG00000225891	AL513365.2	11.8927	-1.87253	0.626143	-2.99057	0.00278456	0.0577372
ENSG00000254681	PKD1P5	385.337	-1.87034	0.469143	-3.98672	6.7e-05	0.0056692
ENSG00000245213	AC105285.1	303.964	-1.87031	0.462324	-4.04544	5.22e-05	0.00475535
ENSG00000254481	PTP4A2P2	49.7314	-1.86822	0.583761	-3.20032	0.00137276	0.0385295
ENSG00000211752	TRBV27	119.357	1.86769	0.643001	2.90465	0.00367664	0.0679724
ENSG00000158773	USF1	713.811	-1.86579	0.672534	-2.77427	0.00553251	0.0865722
ENSG00000170801	HTRA3	2788.29	1.86209	0.534794	3.48189	0.000497886	0.0201561
ENSG00000260467	AC018552.2	21.3991	-1.85912	0.677733	-2.74315	0.00608526	0.0904604
ENSG00000169246	NPIPB3	243.909	-1.85759	0.545384	-3.40602	0.000659175	0.0243271
ENSG00000244560	AC004890.2	56.9229	-1.85665	0.663323	-2.79901	0.00512591	0.0824787
ENSG00000281896	AC018638.8	23.5565	-1.85582	0.623628	-2.97585	0.0029218	0.0595132
ENSG00000146830	GIGYF1	873.334	-1.85493	0.442802	-4.18908	2.8e-05	0.00314875
ENSG00000189319	FAM53B	2717.15	-1.85469	0.350408	-5.29294	1.2e-07	6.64e-05
ENSG00000230732	AC016949.1	33.6323	-1.85221	0.577212	-3.20889	0.00133249	0.0377483
ENSG00000215244	AL137145.2	20.7942	-1.85214	0.48907	-3.78706	0.000152441	0.00968628
ENSG00000282508	LINC01002	53.4665	-1.84942	0.449098	-4.11807	3.82e-05	0.00389102
ENSG00000204176	SYT15	17.3849	-1.84933	0.540952	-3.41866	0.000629303	0.0234916
ENSG00000139714	MORN3	67.1465	-1.84861	0.55807	-3.31251	0.000924624	0.0302302
ENSG00000183397	C19orf71	71.5585	-1.84655	0.458781	-4.02491	5.7e-05	0.00506543
ENSG00000269352	PTOV1-AS2	30.7905	-1.84389	0.702945	-2.62309	0.0087136	0.110783
ENSG00000245904	AC025164.1	33.1143	-1.83974	0.652016	-2.82161	0.00477826	0.0795807
ENSG00000125657	TNFSF9	436.42	1.83372	0.641298	2.85939	0.00424454	0.0740679
ENSG00000136206	SPDYE1	51.9617	-1.83219	0.579332	-3.16259	0.00156371	0.0417022
ENSG00000236526	AL035448.1	64.9284	-1.83024	0.630592	-2.90242	0.00370296	0.0682432
ENSG00000100473	COCH	691.409	1.8263	0.67088	2.72225	0.00648397	0.0939981
ENSG00000167615	LENG8	2925.28	-1.82562	0.344408	-5.30075	1.15e-07	6.48e-05
ENSG00000100359	SGSM3	45.7497	-1.82476	0.707838	-2.57793	0.00993935	0.118675
ENSG00000281021	AL078581.3	88.7061	-1.82305	0.683596	-2.66686	0.00765645	0.103082
ENSG00000236438	FAM157A	34.5413	-1.82206	0.519041	-3.51044	0.000447372	0.0187339
ENSG00000274272	AC069281.2	146.244	-1.82084	0.511373	-3.56068	0.000369894	0.0166077
ENSG00000280239	AC011498.7	45.2184	-1.81412	0.638263	-2.84227	0.00447934	0.0764888
ENSG00000106133	NSUN5P2	48.4289	-1.81047	0.406635	-4.45233	8.49e-06	0.00141873
ENSG00000139998	RAB15	709.487	-1.81004	0.358069	-5.05501	4.3e-07	0.000175929
ENSG00000283118	AC009951.2	28.7382	-1.80594	0.678777	-2.66058	0.00780064	0.104255
ENSG00000201944	RF00139	5.9876	-1.80537	0.669951	-2.69478	0.00704348	0.0981715
ENSG00000225357	RPF2P1	14.7363	1.80344	0.521243	3.45989	0.000540402	0.0212019
ENSG00000152433	ZNF547	67.0961	1.80197	0.609568	2.95615	0.00311506	0.0620656
ENSG00000285190	AC018754.1	10.3951	-1.80134	0.592658	-3.03943	0.0023703	0.0527438
ENSG00000251586	TET2-AS1	24.521	-1.80049	0.696987	-2.58325	0.00978751	0.117535
ENSG00000238164	TNFRSF14-AS1	52.9453	-1.798	0.653728	-2.75039	0.00595252	0.089809
ENSG00000173991	TCAP	90.1263	-1.79588	0.664848	-2.70119	0.00690919	0.0971842
ENSG00000080947	CROCCP3	138.491	-1.79443	0.601554	-2.98299	0.00285446	0.0585494
ENSG00000230747	AC021188.1	201.355	-1.79302	0.467518	-3.83518	0.00012547	0.00845017
ENSG00000198435	NRARP	1404.23	1.78652	0.630561	2.83322	0.00460814	0.0780819
ENSG00000274422	AC245060.5	152.489	-1.7846	0.583987	-3.0559	0.00224389	0.0513491
ENSG00000118898	PPL	57.0706	-1.78404	0.679366	-2.62604	0.00863852	0.110074
ENSG00000253846	PCDHGA10	71.9789	1.78102	0.664222	2.68135	0.00733249	0.100526
ENSG00000161664	ASB16	15.1404	-1.78003	0.656706	-2.71054	0.00671735	0.0957068
ENSG00000238184	CD81-AS1	17.4892	-1.77796	0.682804	-2.60391	0.00921665	0.114208
ENSG00000250067	YJEFN3	49.7386	-1.77629	0.648931	-2.73725	0.00619559	0.0913269
ENSG00000240143	AL023653.1	34.9479	-1.77475	0.465901	-3.80929	0.000139367	0.00907251
ENSG00000259972	AC009120.2	65.0894	-1.77408	0.550188	-3.2245	0.00126195	0.0365921
ENSG00000142102	PGGHG	1642.06	-1.77366	0.536399	-3.3066	0.000944349	0.0306353
ENSG00000151631	AKR1C6P	92.2703	-1.76973	0.603949	-2.93026	0.00338681	0.0647861
ENSG00000200842	RF00019	30.3005	-1.76872	0.681205	-2.59646	0.00941896	0.115433
ENSG00000232729	AC211433.1	60.4047	-1.76699	0.60247	-2.93292	0.00335792	0.064614
ENSG00000072201	LNX1	161.166	1.76671	0.617545	2.86087	0.00422483	0.0738561
ENSG00000125430	HS3ST3B1	523.881	-1.76515	0.555403	-3.17814	0.00148221	0.0403676
ENSG00000264745	TTC39C-AS1	24.4648	-1.76023	0.668928	-2.63142	0.00850281	0.109147
ENSG00000243716	NPIPB5	553.272	-1.75945	0.461141	-3.81542	0.00013595	0.00894973
ENSG00000225313	AL513327.1	92.2439	-1.75928	0.524699	-3.35293	0.000799616	0.0273356
ENSG00000239653	PSMD6-AS2	438.424	-1.75761	0.445227	-3.94768	7.89e-05	0.0064608
ENSG00000111788	AC009533.1	643.42	-1.75382	0.475474	-3.68857	0.000225516	0.0124362
ENSG00000158321	AUTS2	1540.93	-1.75279	0.61158	-2.86599	0.00415701	0.0731519
ENSG00000246451	AL049840.1	89.986	-1.75157	0.610498	-2.86908	0.00411674	0.0728625
ENSG00000225544	AC245452.2	5.05631	-1.75074	0.489039	-3.57996	0.000343651	0.0160925
ENSG00000254815	AP006284.1	9.34065	-1.74586	0.655835	-2.66204	0.00776688	0.103898
ENSG00000180667	YOD1	1370.01	-1.74579	0.43592	-4.00483	6.21e-05	0.00535104
ENSG00000213782	DDX47	272.12	-1.74548	0.579015	-3.01456	0.0025735	0.0551473
ENSG00000246859	STARD4-AS1	97.9718	-1.74473	0.602366	-2.89646	0.00377393	0.069029
ENSG00000268970	AC022150.2	8.27588	-1.7439	0.660075	-2.64197	0.00824249	0.107553
ENSG00000198563	DDX39B	1649.6	-1.74307	0.481926	-3.61689	0.000298167	0.0148977
ENSG00000173338	KCNK7	31.5042	-1.74278	0.511369	-3.40806	0.000654264	0.0241812
ENSG00000162461	SLC25A34	49.0717	-1.73857	0.570439	-3.04777	0.00230547	0.0522288
ENSG00000242588	AC108010.1	33.3229	-1.73817	0.541157	-3.21196	0.00131833	0.0376672
ENSG00000237938	AL450998.3	60.2304	-1.73782	0.571854	-3.03893	0.00237423	0.0527438
ENSG00000221995	TIAF1	148.668	-1.73713	0.674099	-2.57696	0.00996729	0.118873
ENSG00000197217	ENTPD4	1956.4	-1.73679	0.313997	-5.53125	3.18e-08	2.21e-05
ENSG00000185883	ATP6V0C	19.088	-1.7338	0.493755	-3.51146	0.000445654	0.0187253
ENSG00000145217	SLC26A1	128.948	-1.73372	0.642215	-2.6996	0.00694235	0.0972487
ENSG00000261505	AL031714.1	148.372	-1.73241	0.665537	-2.60302	0.00924068	0.114314
ENSG00000116704	SLC35D1	2013.42	-1.72843	0.490632	-3.52286	0.00042691	0.0182856
ENSG00000214021	TTLL3	491.52	-1.72824	0.46692	-3.70137	0.000214437	0.0121234
ENSG00000234222	LIX1L-AS1	12.8439	-1.7247	0.489529	-3.52319	0.000426393	0.0182856
ENSG00000233825	AL391839.2	87.4657	-1.72398	0.471484	-3.6565	0.00025568	0.0135011
ENSG00000207313	SNORA2B	14.1517	-1.72384	0.59177	-2.91302	0.00357949	0.0666825
ENSG00000183281	PLGLB1	13.8076	-1.72344	0.618115	-2.78822	0.00529982	0.0842351
ENSG00000186130	ZBTB6	484.634	1.72328	0.500846	3.44074	0.00058012	0.0223403
ENSG00000167549	CORO6	266.378	-1.72293	0.591361	-2.91349	0.00357411	0.0666672
ENSG00000214826	DDX12P	747.517	-1.72214	0.426615	-4.03676	5.42e-05	0.0049041
ENSG00000096433	ITPR3	560.517	-1.72136	0.645823	-2.66538	0.00769025	0.103274
ENSG00000258469	CHMP4BP1	69.0044	-1.71971	0.59634	-2.88377	0.00392944	0.0708535
ENSG00000206650	SNORA70G	42.6011	-1.71892	0.529944	-3.24358	0.00118037	0.0351212
ENSG00000144791	LIMD1	1635.15	-1.71752	0.309522	-5.54894	2.87e-08	2.09e-05
ENSG00000264829	AC087749.2	56.4317	-1.71648	0.480663	-3.57108	0.000355518	0.0162041
ENSG00000273253	AL022328.4	346.209	-1.71645	0.468603	-3.6629	0.000249373	0.0133253
ENSG00000283674	AC068587.4	68.0276	-1.71132	0.548669	-3.11904	0.00181441	0.0453278
ENSG00000071564	TCF3	16074.5	-1.71122	0.343204	-4.986	6.16e-07	0.000217078
ENSG00000183458	AC138932.1	646.471	-1.71069	0.430181	-3.97667	6.99e-05	0.00581966
ENSG00000256235	SMIM3	16055.9	-1.71035	0.406777	-4.20463	2.62e-05	0.00302119
ENSG00000266074	BAHCC1	1975.97	-1.71018	0.517848	-3.30248	0.000958336	0.0309174
ENSG00000008128	CDK11A	115.393	-1.71013	0.522722	-3.2716	0.00106942	0.0330774
ENSG00000265982	AC103810.3	25.5227	-1.70837	0.550448	-3.10359	0.00191186	0.0466069
ENSG00000170667	RASA4B	2.9926	-1.70603	0.659092	-2.58845	0.00964093	0.116782
ENSG00000113108	APBB3	534.963	-1.70418	0.341735	-4.98685	6.14e-07	0.000217078
ENSG00000234332	BCAS2P2	79.8241	-1.70159	0.49072	-3.46753	0.000525265	0.0208035
ENSG00000253043	RNU7-181P	10.8597	-1.70097	0.615399	-2.76401	0.00570965	0.0877893
ENSG00000101470	TNNC2	39.4563	-1.69992	0.556135	-3.05667	0.00223812	0.0512681
ENSG00000198064	NPIPB13	43.0843	-1.69964	0.636715	-2.66938	0.00759908	0.10264
ENSG00000164406	LEAP2	68.9849	-1.69631	0.633212	-2.67889	0.0073867	0.10108
ENSG00000227638	HNRNPA1P14	20.6806	-1.69462	0.635809	-2.6653	0.00769191	0.103274
ENSG00000279827	AC136469.2	57.5513	-1.69451	0.492797	-3.43856	0.00058482	0.0224515
ENSG00000271550	BNIP3P11	67.2179	-1.6935	0.584409	-2.8978	0.00375794	0.0688225
ENSG00000228976	SUMO2P8	12.4726	-1.69307	0.604777	-2.7995	0.00511818	0.0824693
ENSG00000261416	AC012645.3	20.9895	-1.6897	0.605006	-2.79286	0.00522441	0.0833274
ENSG00000124091	GCNT7	34.7315	-1.68457	0.595786	-2.82748	0.00469154	0.0787606
ENSG00000227039	ITGB2-AS1	495.856	-1.68457	0.554297	-3.0391	0.00237283	0.0527438
ENSG00000189057	FAM111B	531.57	-1.68362	0.551027	-3.05542	0.00224742	0.0513491
ENSG00000168675	LDLRAD4	2643.6	-1.68312	0.377939	-4.4534	8.45e-06	0.00141873
ENSG00000136828	RALGPS1	169.626	-1.67956	0.478332	-3.51129	0.000445942	0.0187253
ENSG00000237094	AL732372.2	33.5936	-1.67881	0.459863	-3.65066	0.000261562	0.0136359
ENSG00000179456	ZBTB18	395.082	-1.67761	0.477824	-3.51094	0.000446527	0.0187253
ENSG00000158106	RHPN1	2391.85	-1.67568	0.366242	-4.57534	4.75e-06	0.00099263
ENSG00000270012	AC232271.1	139.669	-1.67442	0.54804	-3.05529	0.00224846	0.0513491
ENSG00000263264	AC119396.1	427.006	-1.67214	0.444451	-3.76226	0.000168387	0.0103641
ENSG00000234290	AC116366.1	412.608	-1.67194	0.552686	-3.02511	0.00248542	0.0540927
ENSG00000111057	KRT18	2804.15	1.6694	0.565349	2.95286	0.0031484	0.0624523
ENSG00000258405	ZNF578	75.5155	-1.66876	0.589542	-2.83061	0.00464592	0.0784835
ENSG00000135185	TMEM243	2036.18	-1.6665	0.387963	-4.2955	1.74e-05	0.00235224
ENSG00000272434	AC137630.3	24.2878	-1.66611	0.395697	-4.21057	2.55e-05	0.00296636
ENSG00000197774	EME2	404.781	-1.66253	0.340245	-4.88628	1.03e-06	0.000330054
ENSG00000136379	ABHD17C	3790.82	1.65705	0.606968	2.73005	0.00633247	0.0929642
ENSG00000279716	AC006128.1	83.6219	-1.65517	0.573885	-2.88415	0.0039247	0.0708535
ENSG00000015413	DPEP1	146.864	-1.65263	0.599027	-2.75885	0.00580054	0.088687
ENSG00000151967	SCHIP1	291.249	-1.65166	0.467378	-3.53389	0.000409496	0.0178648
ENSG00000247982	LINC00926	219.088	-1.64886	0.597634	-2.75898	0.00579827	0.088687
ENSG00000258424	AL512791.1	22.2908	-1.64563	0.596905	-2.75694	0.00583443	0.0888323
ENSG00000124224	PPP4R1L	460.425	-1.64539	0.460304	-3.57457	0.000350802	0.0160967
ENSG00000258851	AL139300.2	3.18813	-1.64457	0.607985	-2.70495	0.00683149	0.0965559
ENSG00000259088	AL137779.2	23.1957	-1.64454	0.576896	-2.85067	0.00436278	0.0755362
ENSG00000240053	LY6G5B	64.1971	-1.64218	0.623486	-2.63387	0.00844175	0.108794
ENSG00000111912	NCOA7	10417.3	1.63634	0.479005	3.41612	0.000635208	0.0236215
ENSG00000211689	TRGC1	1038.68	1.63545	0.488394	3.34862	0.000812154	0.0275708
ENSG00000255585	AL590627.1	37.8089	-1.63172	0.629389	-2.59255	0.00952679	0.116024
ENSG00000258472	AC005726.1	80.6384	-1.63097	0.497745	-3.27672	0.00105021	0.0326212
ENSG00000278963	AC005921.3	147.896	-1.63075	0.481846	-3.38437	0.000713419	0.0256791
ENSG00000237017	AC245052.4	49.7178	-1.62753	0.53238	-3.05708	0.00223508	0.0512528
ENSG00000185864	NPIPB4	415.889	-1.62044	0.523996	-3.09247	0.00198499	0.0478009
ENSG00000200665	RNU6-1188P	18.804	-1.61646	0.598738	-2.69979	0.00693843	0.0972487
ENSG00000237629	UQCRHP2	15.7366	1.61605	0.375481	4.30396	1.68e-05	0.00229154
ENSG00000157306	ZFHX2-AS1	26.8203	-1.61475	0.427529	-3.77693	0.000158773	0.00995573
ENSG00000196696	AC009022.1	114.32	-1.60679	0.572583	-2.80621	0.00501281	0.081643
ENSG00000259617	AC020661.3	26.4428	-1.60648	0.620176	-2.59036	0.00958762	0.116426
ENSG00000254791	FAR1-IT1	24.6336	-1.60497	0.610697	-2.6281	0.00858637	0.109738
ENSG00000241860	AL627309.5	20.5756	-1.6046	0.530855	-3.02266	0.0025056	0.0543237
ENSG00000229413	AC018638.1	23.6252	-1.6006	0.585635	-2.7331	0.00627415	0.092247
ENSG00000108219	TSPAN14	9873.47	-1.6	0.372521	-4.29508	1.75e-05	0.00235224
ENSG00000230358	SPDYE21P	28.4111	-1.59888	0.584111	-2.73728	0.00619487	0.0913269
ENSG00000166126	AMN	743.58	1.59399	0.60024	2.65559	0.00791688	0.10504
ENSG00000163376	KBTBD8	427.026	1.59184	0.519564	3.0638	0.00218544	0.0506971
ENSG00000272195	AL356512.1	100.387	-1.58972	0.423239	-3.75609	0.00017259	0.0105096
ENSG00000256663	AC112777.1	415.864	-1.58837	0.543888	-2.92041	0.00349576	0.0659998
ENSG00000214655	ZSWIM8	1760.81	-1.5853	0.285833	-5.54625	2.92e-08	2.09e-05
ENSG00000110719	TCIRG1	12613.9	-1.58436	0.384144	-4.1244	3.72e-05	0.00381218
ENSG00000159214	CCDC24	233.67	-1.58428	0.412489	-3.84078	0.000122643	0.00833661
ENSG00000160298	C21orf58	879.64	-1.58398	0.435968	-3.63324	0.000279883	0.0144027
ENSG00000139190	VAMP1	842.725	-1.58341	0.40869	-3.87435	0.000106909	0.00770764
ENSG00000226174	TEX22	76.7108	-1.57913	0.407829	-3.87203	0.000107931	0.00775111
ENSG00000275056	AC020663.3	223.81	-1.57882	0.527436	-2.99339	0.002759	0.0574789
ENSG00000206561	COLQ	138.611	-1.57526	0.603356	-2.61083	0.00903229	0.113064
ENSG00000100099	HPS4	6228.69	-1.5729	0.333114	-4.72179	2.34e-06	0.000573377
ENSG00000061938	TNK2	1238.18	-1.57257	0.285536	-5.50744	3.64e-08	2.42e-05
ENSG00000162148	PPP1R32	153.921	-1.572	0.444291	-3.53822	0.000402828	0.0176791
ENSG00000206066	IGLL3P	170.014	-1.56986	0.569063	-2.75867	0.00580366	0.088687
ENSG00000231466	AL022324.2	166.283	-1.56881	0.574074	-2.73276	0.00628061	0.0922955
ENSG00000274021	AC024909.2	32.8106	-1.56724	0.576311	-2.71944	0.00653928	0.0942489
ENSG00000076641	PAG1	4494.4	-1.56594	0.439973	-3.55918	0.000372012	0.0166772
ENSG00000224470	ATXN1L	831.814	-1.56535	0.461792	-3.38972	0.000699632	0.0253306
ENSG00000279873	LINC01126	197.079	-1.56387	0.533635	-2.9306	0.00338308	0.0647571
ENSG00000102804	TSC22D1	48229.8	1.56147	0.572996	2.72511	0.00642808	0.0935981
ENSG00000261386	AC027682.4	29.1946	-1.56095	0.516128	-3.02435	0.00249165	0.0541878
ENSG00000176533	GNG7	2868.12	-1.55876	0.333198	-4.67818	2.89e-06	0.000666118
ENSG00000179583	CIITA	5976.46	-1.55572	0.43772	-3.55415	0.000379201	0.0169216
ENSG00000067191	CACNB1	329.724	-1.55397	0.575656	-2.69948	0.00694487	0.0972487
ENSG00000147650	LRP12	1341.81	1.55169	0.504189	3.07759	0.00208682	0.0491505
ENSG00000159314	ARHGAP27	5342.75	-1.54861	0.363443	-4.26096	2.04e-05	0.00259413
ENSG00000162298	SYVN1	2000.18	-1.54673	0.361177	-4.28247	1.85e-05	0.00243821
ENSG00000214872	SMTNL1	48.7503	-1.54545	0.559861	-2.76041	0.00577282	0.0884813
ENSG00000227682	ATP5F1AP2	8.18766	1.54461	0.585251	2.63923	0.00830943	0.108
ENSG00000260007	AC107871.1	82.5771	-1.54091	0.405738	-3.7978	0.000145986	0.0094195
ENSG00000154358	OBSCN	475.575	-1.53979	0.497924	-3.09241	0.00198537	0.0478009
ENSG00000235314	LINC00957	28.9725	-1.53919	0.568608	-2.70695	0.00679048	0.0963023
ENSG00000265749	AC135178.3	47.9368	-1.53403	0.504804	-3.03886	0.00237472	0.0527438
ENSG00000227155	AL161725.1	60.8522	-1.53399	0.58662	-2.61496	0.00892372	0.112256
ENSG00000144711	IQSEC1	4612.36	-1.53074	0.46539	-3.28916	0.00100486	0.031925
ENSG00000205236	AC105052.1	8.26118	-1.53001	0.461313	-3.31664	0.000911059	0.0298574
ENSG00000188549	CCDC9B	331.177	-1.52926	0.592256	-2.58209	0.00982048	0.117737
ENSG00000090975	PITPNM2	822.901	-1.52829	0.561723	-2.72071	0.00651416	0.0940493
ENSG00000076108	BAZ2A	6007.29	-1.52785	0.389099	-3.92663	8.61e-05	0.00672981
ENSG00000169752	NRG4	145.249	1.52703	0.529357	2.88469	0.00391793	0.0707771
ENSG00000053702	NRIP2	168.416	-1.52697	0.491567	-3.10633	0.00189427	0.0464105
ENSG00000207031	SNORD59A	61.9969	-1.52542	0.585176	-2.60678	0.00913984	0.113583
ENSG00000258366	RTEL1	23.3125	-1.52527	0.436176	-3.49691	0.000470687	0.0194961
ENSG00000242659	AC108693.2	29.1214	-1.52172	0.553237	-2.75057	0.00594913	0.089809
ENSG00000223705	NSUN5P1	784.058	-1.52013	0.404191	-3.76091	0.0001693	0.0103959
ENSG00000168026	TTC21A	197.248	-1.51753	0.557733	-2.72088	0.00651081	0.0940493
ENSG00000171132	PRKCE	1317.1	-1.51703	0.408887	-3.71014	0.000207143	0.0118485
ENSG00000141391	PRELID3A	34.1694	-1.5138	0.574792	-2.63366	0.00844708	0.108814
ENSG00000274561	AC005332.4	33.8814	-1.51376	0.587579	-2.57627	0.00998726	0.119004
ENSG00000246203	AL353807.3	26.6202	-1.51264	0.462872	-3.26795	0.00108331	0.0334298
ENSG00000173678	SPDYE2B	44.0934	-1.51248	0.484426	-3.12221	0.00179496	0.0451118
ENSG00000235859	AC006978.1	590.256	-1.50797	0.366536	-4.1141	3.89e-05	0.00393114
ENSG00000101104	PABPC1L	367.33	-1.50749	0.529433	-2.84737	0.00440821	0.0758069
ENSG00000162994	CLHC1	148.714	-1.50544	0.506972	-2.96948	0.00298308	0.0602159
ENSG00000166507	NDST2	34.3135	-1.50317	0.478572	-3.14095	0.00168398	0.0434431
ENSG00000241489	AC244197.3	54.373	-1.49973	0.52417	-2.86115	0.0042211	0.0738561
ENSG00000196338	NLGN3	68.4246	-1.49929	0.557899	-2.68739	0.00720126	0.0993325
ENSG00000204469	PRRC2A	1516.03	-1.49756	0.244425	-6.12686	8.96e-10	1.19e-06
ENSG00000108785	HSD17B1P1	18.6146	-1.49681	0.486958	-3.0738	0.00211351	0.049659
ENSG00000275713	HIST1H2BH	160.681	-1.49626	0.580069	-2.57945	0.00989584	0.118363
ENSG00000015479	MATR3	365.885	-1.49608	0.467378	-3.20101	0.00136947	0.0384888
ENSG00000198625	MDM4	3388.33	-1.49587	0.427538	-3.49881	0.000467336	0.0194031
ENSG00000233483	AC008105.2	26.79	-1.4956	0.575245	-2.59993	0.00932431	0.114802
ENSG00000124181	PLCG1	1043.1	-1.49544	0.475496	-3.14502	0.00166076	0.0430436
ENSG00000243663	RPS4XP14	22.065	-1.4951	0.479886	-3.11554	0.00183609	0.0455191
ENSG00000172817	CYP7B1	352.497	1.49394	0.529239	2.82281	0.00476052	0.0794662
ENSG00000047662	FAM184B	55.1672	-1.48985	0.543747	-2.73997	0.00614454	0.0911207
ENSG00000146067	FAM193B	3409.97	-1.48915	0.342908	-4.34271	1.41e-05	0.00205103
ENSG00000272927	AC107464.3	97.0313	-1.48847	0.474425	-3.13742	0.00170442	0.0438302
ENSG00000213347	MXD3	1439.48	-1.48704	0.292297	-5.08741	3.63e-07	0.000164031
ENSG00000268362	AC092279.1	251.484	-1.48677	0.440938	-3.37183	0.000746693	0.0264226
ENSG00000167207	NOD2	812.113	-1.48615	0.563137	-2.63906	0.00831368	0.108
ENSG00000268001	CARD8-AS1	745.09	1.48447	0.484834	3.06181	0.0022	0.0509135
ENSG00000260793	AC003102.1	145.764	-1.48361	0.460769	-3.21986	0.00128253	0.03699
ENSG00000176809	LRRC37A3	214.889	-1.48224	0.489853	-3.02588	0.00247908	0.0540372
ENSG00000220323	HIST2H2BD	36.6718	-1.48006	0.412576	-3.58737	0.000334032	0.0157729
ENSG00000183426	NPIPA1	178.021	-1.47735	0.510009	-2.89671	0.00377093	0.0690172
ENSG00000179397	CATSPERE	69.9896	-1.474	0.375562	-3.92477	8.68e-05	0.00672981
ENSG00000196440	ARMCX4	146.009	-1.47179	0.491078	-2.99705	0.00272603	0.0570991
ENSG00000180096	2022-09-01	1294.05	-1.47093	0.348037	-4.22637	2.37e-05	0.00284488
ENSG00000102606	ARHGEF7	3492.13	-1.46786	0.385257	-3.81008	0.000138923	0.00906382
ENSG00000267156	TPMTP1	14.2504	1.46669	0.413565	3.54646	0.000390439	0.0172389
ENSG00000167302	TEPSIN	326.239	-1.46541	0.445294	-3.29088	0.000998738	0.0317651
ENSG00000234771	SLC25A25-AS1	201.352	-1.46484	0.471289	-3.10816	0.00188259	0.0462017
ENSG00000170903	MSANTD4	667.552	1.46276	0.483291	3.02666	0.00247273	0.0540175
ENSG00000243679	AC018638.5	205.081	-1.46113	0.468046	-3.12177	0.00179766	0.0451408
ENSG00000115266	APC2	32.298	-1.46087	0.524698	-2.78422	0.00536571	0.0848211
ENSG00000033327	GAB2	2964.29	-1.45966	0.405772	-3.59724	0.00032161	0.0154865
ENSG00000263327	TAPT1-AS1	302.026	-1.45651	0.513778	-2.83491	0.00458385	0.0778057
ENSG00000255240	AP001636.3	100.658	-1.45582	0.496698	-2.931	0.00337869	0.0647571
ENSG00000267342	AC087289.2	69.9563	-1.45549	0.557478	-2.61085	0.00903187	0.113064
ENSG00000005339	CREBBP	3889.87	-1.45533	0.291575	-4.99127	6e-07	0.000217078
ENSG00000108352	RAPGEFL1	139.091	-1.45378	0.427834	-3.39799	0.000678822	0.0248327
ENSG00000263883	EEF1DP7	63.4935	-1.45311	0.521646	-2.78563	0.00534244	0.0845905
ENSG00000263335	AF001548.2	58.7441	-1.45241	0.435763	-3.33302	0.000859084	0.0285993
ENSG00000139187	KLRG1	433.657	1.45178	0.55465	2.61747	0.00885842	0.111893
ENSG00000253744	AC025442.1	28.9817	-1.44843	0.529528	-2.73532	0.00623188	0.0917178
ENSG00000275807	AC145285.6	110.429	-1.44634	0.414848	-3.48643	0.00048952	0.0199835
ENSG00000005206	SPPL2B	4888.13	-1.4463	0.285552	-5.06491	4.09e-07	0.000174384
ENSG00000154545	MAGED4	49.5108	-1.44589	0.511398	-2.82734	0.00469366	0.0787606
ENSG00000121210	TMEM131L	3510.22	-1.44362	0.38211	-3.77803	0.000158072	0.00995573
ENSG00000169662	BCRP6	4.38446	-1.44291	0.478384	-3.01623	0.00255942	0.0548857
ENSG00000197121	PGAP1	190.141	-1.44101	0.522691	-2.7569	0.00583523	0.0888323
ENSG00000068724	TTC7A	9657.97	-1.4362	0.33035	-4.34749	1.38e-05	0.00202255
ENSG00000221968	FADS3	2458.6	-1.4357	0.381897	-3.75939	0.00017033	0.0104236
ENSG00000229598	PRDX3P1	36.1262	-1.43391	0.467358	-3.06811	0.00215415	0.0502905
ENSG00000172667	ZMAT3	1519.89	1.43311	0.311185	4.60533	4.12e-06	0.00089163
ENSG00000189283	FHIT	1657.5	-1.43263	0.321916	-4.45033	8.57e-06	0.00142391
ENSG00000250251	PKD1P6	1131.19	-1.43074	0.409545	-3.49349	0.000476747	0.0196542
ENSG00000257564	AC068993.1	31.1806	1.43064	0.477478	2.99625	0.00273325	0.0571052
ENSG00000206417	H1FX-AS1	77.7819	-1.429	0.517242	-2.76274	0.00573186	0.0879918
ENSG00000114841	DNAH1	405.623	-1.4265	0.477088	-2.99001	0.00278967	0.0577372
ENSG00000079432	CIC	1410.92	-1.42564	0.284901	-5.00397	5.62e-07	0.000211544
ENSG00000170638	TRABD	8984.86	-1.42365	0.291588	-4.88242	1.05e-06	0.000331715
ENSG00000137802	MAPKBP1	731.636	-1.42124	0.454953	-3.12392	0.00178457	0.0449277
ENSG00000109458	GAB1	978.9	-1.42048	0.522077	-2.72082	0.00651205	0.0940493
ENSG00000167981	ZNF597	360.521	1.41941	0.403517	3.51759	0.000435489	0.0185116
ENSG00000052802	MSMO1	1976.42	1.41848	0.534035	2.65616	0.00790363	0.105007
ENSG00000261535	AC005086.1	31.071	-1.41772	0.498219	-2.84557	0.00443319	0.0759987
ENSG00000076555	ACACB	542.301	-1.4172	0.480288	-2.95073	0.00317022	0.0625674
ENSG00000177169	ULK1	900.907	-1.41498	0.430859	-3.28409	0.00102314	0.0322255
ENSG00000102760	RGCC	8221.14	1.41243	0.533098	2.64948	0.00806159	0.106428
ENSG00000274275	AC009831.3	69.0915	-1.40884	0.521909	-2.6994	0.00694655	0.0972487
ENSG00000197933	ZNF823	340.834	1.40868	0.527092	2.67256	0.0075276	0.102099
ENSG00000144655	CSRNP1	29462.1	-1.40806	0.526417	-2.67479	0.00747756	0.101822
ENSG00000118496	FBXO30	966.213	1.40719	0.320186	4.3949	1.11e-05	0.00178547
ENSG00000197536	C5orf56	626.146	-1.4061	0.388445	-3.61981	0.000294819	0.0148682
ENSG00000090924	PLEKHG2	1122.58	-1.40534	0.289925	-4.84726	1.25e-06	0.000365879
ENSG00000200488	RN7SKP203	9.30191	-1.40533	0.490901	-2.86276	0.00419965	0.0736925
ENSG00000133624	ZNF767P	542.923	-1.40387	0.459777	-3.05336	0.00226292	0.0515936
ENSG00000169203	NPIPB12	91.2521	-1.4007	0.538976	-2.59882	0.00935451	0.115077
ENSG00000274737	AC004466.2	23.3889	-1.39983	0.524968	-2.66651	0.00766438	0.103139
ENSG00000188747	NOXA1	794.574	-1.39926	0.40599	-3.44655	0.000567799	0.0218947
ENSG00000215440	NPEPL1	682.51	-1.39763	0.191032	-7.3162	2.55e-13	9.32e-10
ENSG00000279799	AC006077.2	281.68	-1.39552	0.515651	-2.70632	0.00680339	0.0963327
ENSG00000185262	UBALD2	1183.42	-1.39519	0.482174	-2.89354	0.00380926	0.0693712
ENSG00000140948	ZCCHC14	245.865	-1.39477	0.410019	-3.40172	0.000669627	0.0246195
ENSG00000135476	ESPL1	725.996	-1.39453	0.401934	-3.46955	0.000521323	0.0206754
ENSG00000269688	AC008982.2	258.747	-1.39448	0.517574	-2.69427	0.00705422	0.0981847
ENSG00000241185	AC005410.1	303.108	-1.39085	0.531924	-2.61476	0.00892913	0.112256
ENSG00000223599	AL513523.1	45.6065	-1.38933	0.510609	-2.72093	0.00650986	0.0940493
ENSG00000270362	HMGN3-AS1	180.575	-1.38768	0.49384	-2.80998	0.00495449	0.0810834
ENSG00000204316	MRPL38	194.822	-1.3864	0.497364	-2.7875	0.00531168	0.084332
ENSG00000239486	AC091390.3	13.2295	-1.38342	0.478768	-2.88955	0.00385793	0.0701123
ENSG00000228363	AC015971.1	178.46	-1.38119	0.506028	-2.72946	0.00634374	0.0930363
ENSG00000223745	CCDC18-AS1	1343.64	-1.38015	0.442821	-3.11672	0.00182877	0.0454148
ENSG00000167524	SGK494	26.1729	-1.37945	0.460144	-2.99787	0.00271877	0.0570065
ENSG00000181788	SIAH2	12202	-1.37868	0.315464	-4.37033	1.24e-05	0.00190844
ENSG00000105519	CAPS	287.187	-1.37811	0.315925	-4.36216	1.29e-05	0.00196047
ENSG00000114857	NKTR	3475.52	-1.37531	0.452798	-3.03736	0.0023866	0.0528274
ENSG00000100902	PSMA6	743.283	-1.3753	0.455176	-3.02147	0.00251547	0.0544092
ENSG00000227827	AC138969.2	202.774	-1.37181	0.518074	-2.64791	0.00809915	0.106491
ENSG00000205746	AC126755.1	652.356	-1.37085	0.433728	-3.16062	0.00157432	0.0417566
ENSG00000272333	KMT2B	530.78	-1.36735	0.311964	-4.38302	1.17e-05	0.0018419
ENSG00000158062	UBXN11	3185.93	-1.36296	0.308416	-4.41923	9.91e-06	0.00162654
ENSG00000104866	PPP1R37	283.07	-1.36235	0.370114	-3.6809	0.000232411	0.0127218
ENSG00000269608	AC011487.3	10.4707	1.36234	0.502538	2.71092	0.00670963	0.0956662
ENSG00000235316	DUSP8P5	606.89	-1.36162	0.352134	-3.86677	0.000110288	0.00782989
ENSG00000213213	CCDC183	22.4379	-1.36156	0.373961	-3.64091	0.000271673	0.0140793
ENSG00000184640	2022-09-09	12534	-1.36131	0.29092	-4.67932	2.88e-06	0.000666118
ENSG00000229474	PATL2	388.245	-1.36094	0.303859	-4.47886	7.5e-06	0.00132936
ENSG00000272008	AL139274.2	98.7022	-1.36022	0.423269	-3.21361	0.00131076	0.0374874
ENSG00000090447	TFAP4	112.077	-1.35811	0.353898	-3.83757	0.000124258	0.00838782
ENSG00000245849	RAD51-AS1	460.908	-1.35771	0.391248	-3.47021	0.000520051	0.0206617
ENSG00000213923	CSNK1E	2572.07	-1.35715	0.514006	-2.64034	0.00828229	0.107896
ENSG00000156675	RAB11FIP1	4824.38	1.35422	0.416054	3.25493	0.00113422	0.0342836
ENSG00000258568	RHOQP1	64.3962	-1.35089	0.385127	-3.50765	0.000452082	0.0188836
ENSG00000196535	MYO18A	5901.53	-1.34928	0.378607	-3.56379	0.000365543	0.0165138
ENSG00000168016	TRANK1	840.3	-1.34813	0.390868	-3.44905	0.000562556	0.0217499
ENSG00000276043	UHRF1	12603.5	-1.34433	0.502788	-2.67375	0.00750094	0.101927
ENSG00000197256	KANK2	2654.54	-1.33735	0.390373	-3.42581	0.000612968	0.0231728
ENSG00000188599	NPIPP1	78.6667	-1.33698	0.494045	-2.7062	0.00680581	0.0963327
ENSG00000114554	PLXNA1	727.276	-1.33588	0.493559	-2.70662	0.00679711	0.0963028
ENSG00000171295	ZNF440	967.864	1.33535	0.388509	3.43711	0.000587955	0.0224939
ENSG00000225918	RPL7P59	39.0698	1.33424	0.363193	3.67363	0.000239127	0.0129674
ENSG00000224834	BTF3P9	10.731	1.3339	0.462946	2.88133	0.00395996	0.0711537
ENSG00000110060	PUS3	323.246	1.33169	0.365242	3.64604	0.000266312	0.0138506
ENSG00000187792	ZNF70	282.847	-1.33152	0.483308	-2.75501	0.00586905	0.0891151
ENSG00000171608	PIK3CD	9998.94	-1.33144	0.344403	-3.86594	0.000110661	0.00782989
ENSG00000228327	AL669831.1	128.171	-1.33109	0.318517	-4.17903	2.93e-05	0.00323297
ENSG00000100445	SDR39U1	442.291	-1.33025	0.404589	-3.2879	0.00100936	0.0320334
ENSG00000168811	IL12A	156.502	-1.32766	0.474131	-2.80018	0.00510734	0.0824462
ENSG00000023608	SNAPC1	520.544	1.32752	0.297321	4.46494	8.01e-06	0.00137557
ENSG00000275557	AC242842.1	170.614	-1.32734	0.40987	-3.23845	0.00120181	0.0354825
ENSG00000182888	AC007685.1	10.2367	1.32595	0.4266	3.10818	0.00188243	0.0462017
ENSG00000139055	ERP27	263.919	-1.32453	0.447254	-2.96147	0.00306173	0.0614217
ENSG00000258413	AL158801.2	54.1678	-1.32451	0.502214	-2.63734	0.00835581	0.108204
ENSG00000107036	RIC1	1878.56	-1.32299	0.319891	-4.13574	3.54e-05	0.00369348
ENSG00000185065	AC000068.1	60.5989	-1.3187	0.510645	-2.58242	0.00981088	0.11767
ENSG00000235499	AC073046.1	62.7077	-1.31854	0.408491	-3.22784	0.00124729	0.0364205
ENSG00000128815	WDFY4	2242.28	-1.3185	0.263657	-5.00082	5.71e-07	0.000211544
ENSG00000176248	ANAPC2	445.811	-1.31834	0.324535	-4.06225	4.86e-05	0.00455729
ENSG00000229593	SUCLA2P3	7.79916	1.31789	0.446751	2.94994	0.00317838	0.0626016
ENSG00000148158	SNX30	787.271	-1.31661	0.404107	-3.25806	0.00112176	0.0340831
ENSG00000175463	TBC1D10C	7867.37	-1.31392	0.351649	-3.73645	0.000186639	0.0109764
ENSG00000184844	CYCSP45	22.7623	1.31386	0.372651	3.52572	0.000422334	0.0181898
ENSG00000214176	PLEKHM1P1	2628.99	-1.30974	0.388826	-3.36846	0.000755892	0.0264728
ENSG00000166436	TRIM66	84.4866	-1.30774	0.464444	-2.81571	0.00486699	0.0804528
ENSG00000151287	TEX30	2400.36	1.30773	0.365668	3.57627	0.000348529	0.0160967
ENSG00000122432	SPATA1	69.7373	-1.30585	0.409567	-3.18837	0.00143077	0.0395943
ENSG00000228434	AC004951.1	27.6144	-1.30559	0.488791	-2.67106	0.00756112	0.102252
ENSG00000150907	FOXO1	7461.64	-1.30231	0.438215	-2.97186	0.00296002	0.0599159
ENSG00000261884	AC040162.1	184.436	-1.29935	0.462933	-2.80677	0.00500409	0.0816209
ENSG00000133812	SBF2	990.095	-1.29907	0.303504	-4.28023	1.87e-05	0.00243821
ENSG00000106992	AK1	143.858	-1.29856	0.489023	-2.65541	0.0079212	0.105049
ENSG00000099875	MKNK2	7306.38	-1.29654	0.360806	-3.59346	0.000326317	0.0156572
ENSG00000260101	AC008074.3	129.109	1.29478	0.428676	3.02042	0.00252427	0.0545321
ENSG00000152193	RNF219	607.096	1.29476	0.363995	3.55709	0.00037498	0.0167721
ENSG00000143434	SEMA6C	493.126	-1.29415	0.40331	-3.20882	0.00133279	0.0377483
ENSG00000055163	CYFIP2	14559.5	-1.29099	0.323363	-3.99237	6.54e-05	0.00557895
ENSG00000227040	AC022483.1	30.877	1.28986	0.289286	4.45878	8.24e-06	0.00139263
ENSG00000182118	FAM89A	1097.17	1.2894	0.467758	2.75655	0.00584151	0.0888693
ENSG00000146755	TRIM50	6.55304	-1.28799	0.428394	-3.00656	0.00264225	0.0558829
ENSG00000148773	MKI67	4152.37	-1.285	0.426689	-3.01156	0.00259908	0.0553935
ENSG00000075651	PLD1	1451.23	1.28196	0.451823	2.8373	0.00454967	0.0774015
ENSG00000247679	AC139795.2	94.1357	-1.28182	0.46466	-2.75863	0.00580445	0.088687
ENSG00000240919	AC022034.3	16.0525	1.28082	0.417496	3.06787	0.00215587	0.0502905
ENSG00000125503	PPP1R12C	1143.26	-1.27962	0.322343	-3.96974	7.2e-05	0.00597466
ENSG00000285410	GABPB1-IT1	3670.07	-1.27826	0.286353	-4.46391	8.05e-06	0.00137557
ENSG00000122223	CD244	3018.91	1.2734	0.35386	3.5986	0.000319936	0.0154314
ENSG00000247081	BAALC-AS1	228.347	1.27259	0.453471	2.80634	0.00501078	0.081643
ENSG00000170092	SPDYE5	51.2512	-1.27127	0.470741	-2.70057	0.00692198	0.0972238
ENSG00000278899	AL358852.1	106.99	-1.27108	0.439628	-2.89126	0.003837	0.0698329
ENSG00000146021	KLHL3	296.888	-1.27095	0.435151	-2.9207	0.00349244	0.0659861
ENSG00000115306	SPTBN1	11414.2	-1.27078	0.48344	-2.62861	0.00857342	0.109694
ENSG00000117616	RSRP1	4724.54	-1.27021	0.458524	-2.7702	0.00560213	0.0867499
ENSG00000205078	SYCE1L	116.89	-1.26958	0.409555	-3.0999	0.00193589	0.0469188
ENSG00000234420	ZNF37BP	715.62	-1.26934	0.35078	-3.61861	0.00029619	0.0148682
ENSG00000104343	UBE2W	1730.08	1.26929	0.321306	3.95041	7.8e-05	0.00640543
ENSG00000156232	WHAMM	2631.4	-1.26883	0.453162	-2.79995	0.00511111	0.0824462
ENSG00000169914	OTUD3	245.516	-1.26776	0.399273	-3.17517	0.00149748	0.0406782
ENSG00000107902	LHPP	1283.34	-1.26745	0.352858	-3.59196	0.000328198	0.0156708
ENSG00000265148	TSPOAP1-AS1	528.681	-1.26714	0.42055	-3.01305	0.00258633	0.0552962
ENSG00000104626	ERI1	2465.14	1.2661	0.283735	4.46227	8.11e-06	0.00137813
ENSG00000234684	SDCBP2-AS1	212.072	-1.26525	0.4004	-3.15997	0.00157787	0.0417749
ENSG00000204315	FKBPL	243.628	1.26478	0.363112	3.48318	0.000495498	0.0201152
ENSG00000268061	NAPA-AS1	36.7756	-1.26203	0.347703	-3.62962	0.00028384	0.0145041
ENSG00000205133	TRIQK	1134.57	1.25932	0.366443	3.43662	0.000589021	0.0225052
ENSG00000215441	CTAGE12P	13.0529	1.25908	0.359107	3.50614	0.000454652	0.0189572
ENSG00000177595	PIDD1	2488.13	-1.25736	0.322612	-3.89742	9.72e-05	0.00726772
ENSG00000133731	IMPA1	2103.07	1.2571	0.247501	5.07916	3.79e-07	0.000165715
ENSG00000106479	ZNF862	339.836	-1.25696	0.400894	-3.1354	0.0017162	0.0438859
ENSG00000279159	AC003681.1	395.262	-1.25496	0.459898	-2.72877	0.00635715	0.0930719
ENSG00000285399	AC104162.2	108.26	-1.25424	0.396683	-3.16183	0.00156782	0.0417105
ENSG00000284976	BX255925.3	617.714	-1.25149	0.372363	-3.36093	0.000776799	0.0269017
ENSG00000212123	PRR22	118.482	-1.25119	0.393436	-3.18017	0.00147188	0.0403201
ENSG00000182087	TMEM259	11963.5	-1.24939	0.292634	-4.26947	1.96e-05	0.00252295
ENSG00000232858	RPL34P27	17.2955	1.24876	0.396322	3.15088	0.00162781	0.0425957
ENSG00000163659	TIPARP	1664.41	-1.24669	0.36364	-3.42836	0.00060725	0.0229913
ENSG00000105520	PLPPR2	1348.35	-1.24504	0.459744	-2.70811	0.00676681	0.0961132
ENSG00000103064	SLC7A6	499.277	-1.24493	0.392757	-3.16971	0.00152589	0.0410683
ENSG00000164236	ANKRD33B	563.571	-1.24292	0.448724	-2.7699	0.00560728	0.0867629
ENSG00000075702	WDR62	1450.97	-1.24216	0.362301	-3.42853	0.000606861	0.0229913
ENSG00000161010	MRNIP	568.42	-1.24007	0.365666	-3.39128	0.000695681	0.0252419
ENSG00000134369	NAV1	1732.67	-1.23998	0.471553	-2.62956	0.00854957	0.109558
ENSG00000249193	HSPD1P5	23.6954	1.23857	0.356175	3.47742	0.000506263	0.0202229
ENSG00000184635	ZNF93	1341.12	1.23827	0.329442	3.75867	0.00017082	0.0104236
ENSG00000076924	XAB2	2552.35	-1.23617	0.374122	-3.3042	0.000952474	0.0308472
ENSG00000185513	L3MBTL1	419.579	-1.23525	0.397893	-3.10447	0.0019062	0.0465856
ENSG00000223254	RF00019	13.768	-1.23521	0.427877	-2.88682	0.00389154	0.0704308
ENSG00000272764	AL596094.1	27.2657	-1.23515	0.387665	-3.18611	0.00144198	0.0396871
ENSG00000214089	RPL9P21	53.0193	1.23384	0.322417	3.82684	0.000129796	0.00868149
ENSG00000176834	VSIG10	786.833	-1.2333	0.329392	-3.74417	0.00018099	0.0108715
ENSG00000188215	DCUN1D3	366.775	1.2318	0.389876	3.15947	0.00158055	0.0417786
ENSG00000225098	BCRP1	6.95952	-1.23108	0.47773	-2.57693	0.00996812	0.118873
ENSG00000242067	RPL9P28	74.5099	1.22928	0.308185	3.98877	6.64e-05	0.00564339
ENSG00000265545	AP005403.1	20.1407	1.22884	0.390059	3.15038	0.00163058	0.0426299
ENSG00000103168	TAF1C	2388.36	-1.22801	0.302337	-4.06173	4.87e-05	0.00455729
ENSG00000279225	AC138305.3	15.9549	1.22583	0.376322	3.25741	0.00112435	0.0341262
ENSG00000100241	SBF1	5280.67	-1.22563	0.19029	-6.44085	1.19e-10	2.04e-07
ENSG00000101412	E2F1	4790.89	-1.22001	0.339252	-3.59616	0.00032295	0.0155255
ENSG00000237784	AC097713.2	8.15819	1.21953	0.46997	2.59492	0.00946137	0.115718
ENSG00000276570	AC010327.5	40.0814	-1.2195	0.445917	-2.73482	0.0062415	0.0918132
ENSG00000214719	AC005562.1	24.6914	-1.2179	0.467966	-2.60255	0.00925334	0.114314
ENSG00000223509	AC135983.2	879.311	-1.21755	0.31661	-3.84558	0.000120266	0.00819408
ENSG00000110171	TRIM3	286.886	-1.20973	0.413185	-2.92781	0.00341364	0.0650438
ENSG00000128908	INO80	1848.23	-1.20959	0.333601	-3.62587	0.000287994	0.014643
ENSG00000198205	ZXDA	462.396	-1.2059	0.352223	-3.42369	0.000617767	0.023239
ENSG00000173200	PARP15	420.611	-1.20537	0.298854	-4.0333	5.5e-05	0.00496168
ENSG00000259004	LINC02285	202.024	-1.20155	0.318218	-3.77586	0.000159454	0.00995573
ENSG00000213935	RPL22P16	19.9687	1.20139	0.40946	2.93408	0.00334542	0.0645746
ENSG00000266173	STRADA	543.45	-1.20132	0.39598	-3.03379	0.00241506	0.0531847
ENSG00000242294	STAG3L5P	211.899	-1.20001	0.408116	-2.94037	0.00327823	0.0639648
ENSG00000184922	FMNL1	3696.5	-1.19794	0.440578	-2.71902	0.00654748	0.0942741
ENSG00000159885	ZNF222	287.088	1.19691	0.321276	3.72547	0.000194948	0.0113283
ENSG00000225531	AL807761.2	19.4984	1.19637	0.391778	3.05369	0.00226046	0.0515776
ENSG00000281571	AC241585.3	66.9308	-1.19607	0.350456	-3.41289	0.000642786	0.0238729
ENSG00000127334	DYRK2	3000.35	-1.19562	0.377651	-3.16594	0.00154582	0.0414522
ENSG00000183977	PP2D1	52.2214	-1.19528	0.461357	-2.5908	0.00957534	0.116406
ENSG00000276023	DUSP14	1746.84	1.19393	0.317604	3.75918	0.000170471	0.0104236
ENSG00000239779	WBP1	151.687	-1.19223	0.213437	-5.58584	2.33e-08	1.84e-05
ENSG00000112972	HMGCS1	1427.35	1.19208	0.406928	2.92947	0.00339545	0.0648663
ENSG00000234118	RPL13AP6	96.9285	-1.19159	0.449876	-2.64871	0.00808003	0.106491
ENSG00000111231	GPN3	2367.75	1.18941	0.302275	3.93487	8.32e-05	0.00661163
ENSG00000172534	HCFC1	4145.15	-1.18864	0.196337	-6.05408	1.41e-09	1.65e-06
ENSG00000125868	DSTN	7973.51	1.18846	0.249785	4.75791	1.96e-06	0.000515077
ENSG00000006451	RALA	4531.3	1.18642	0.399437	2.97023	0.00297576	0.0601686
ENSG00000134198	TSPAN2	1450.06	1.18625	0.458966	2.58462	0.00974863	0.117309
ENSG00000141858	SAMD1	2253.01	-1.18593	0.288591	-4.10937	3.97e-05	0.00399869
ENSG00000023171	GRAMD1B	873.924	-1.18503	0.430874	-2.75029	0.00595424	0.089809
ENSG00000064932	SBNO2	939.474	-1.18396	0.442999	-2.67259	0.00752673	0.102099
ENSG00000224086	AC245452.1	419.331	-1.18365	0.43047	-2.74966	0.00596565	0.089809
ENSG00000172250	SERHL	56.1254	-1.18311	0.457444	-2.58634	0.00970005	0.117039
ENSG00000203761	MSTO2P	425.241	-1.18311	0.36206	-3.2677	0.00108425	0.0334298
ENSG00000238035	AC138035.1	20.1177	-1.1818	0.394489	-2.99577	0.00273756	0.0571136
ENSG00000004660	CAMKK1	399.171	-1.18142	0.440578	-2.68153	0.00732863	0.10052
ENSG00000099308	MAST3	979.522	-1.18051	0.426054	-2.77081	0.00559176	0.0867499
ENSG00000183943	PRKX	3441.22	-1.18047	0.270686	-4.36101	1.29e-05	0.00196047
ENSG00000198846	TOX	3060.08	1.17963	0.456559	2.58374	0.0097736	0.117526
ENSG00000049769	PPP1R3F	488.816	-1.17648	0.297365	-3.95635	7.61e-05	0.00628366
ENSG00000256060	TRAPPC2B	480.959	1.17642	0.275494	4.27022	1.95e-05	0.00252295
ENSG00000176531	PHLDB3	267.59	-1.17585	0.371168	-3.16797	0.00153507	0.0412017
ENSG00000107263	RAPGEF1	5573.93	-1.17567	0.329626	-3.56669	0.00036152	0.0163827
ENSG00000123268	ATF1	1366.48	1.17457	0.296465	3.96191	7.44e-05	0.00615645
ENSG00000162511	LAPTM5	114137	-1.17404	0.359624	-3.26464	0.00109603	0.0335805
ENSG00000181359	HSP90AA6P	17.5139	1.17357	0.346795	3.38405	0.000714261	0.0256791
ENSG00000126790	L3HYPDH	582.107	-1.17322	0.350924	-3.34323	0.0008281	0.0279821
ENSG00000230956	AL024493.1	31.5719	1.16988	0.329634	3.54903	0.000386655	0.0171388
ENSG00000257674	AC020629.1	11.4505	1.16971	0.411195	2.84465	0.00444601	0.0761292
ENSG00000256092	AC137767.1	90.55	-1.16864	0.401272	-2.91233	0.00358747	0.0667462
ENSG00000137364	TPMT	2551.41	1.16828	0.217402	5.37383	7.71e-08	4.54e-05
ENSG00000130052	STARD8	1069.97	1.16734	0.407153	2.86709	0.00414268	0.0730756
ENSG00000113161	HMGCR	2572.13	1.16646	0.365652	3.1901	0.00142226	0.0394039
ENSG00000142733	MAP3K6	739.239	-1.16642	0.423823	-2.75213	0.00592083	0.0895763
ENSG00000198720	ANKRD13B	313.205	-1.16632	0.351204	-3.32092	0.000897225	0.0295326
ENSG00000198286	CARD11	923.511	-1.16552	0.416917	-2.79557	0.00518084	0.0828396
ENSG00000120129	DUSP1	53878.1	-1.16497	0.446707	-2.6079	0.00911	0.113452
ENSG00000236813	BTF3P8	14.8638	1.16449	0.385415	3.02141	0.00251605	0.0544092
ENSG00000247373	AC055713.1	135.849	-1.16401	0.308314	-3.77541	0.000159747	0.00995573
ENSG00000101596	SMCHD1	4656.28	-1.16128	0.279945	-4.14824	3.35e-05	0.00357399
ENSG00000205903	ZNF316	1877.24	-1.15867	0.248258	-4.66721	3.05e-06	0.000697205
ENSG00000152133	GPATCH11	1633.57	1.15734	0.311219	3.71874	0.000200221	0.0115347
ENSG00000130723	PRRC2B	4251.98	-1.15597	0.285085	-4.05483	5.02e-05	0.00464059
ENSG00000284428	AC092329.4	123.566	-1.15408	0.362076	-3.18739	0.00143562	0.0396239
ENSG00000257698	AC084033.3	1782.54	1.15254	0.385529	2.98949	0.00279444	0.0577372
ENSG00000261221	ZNF865	63.1236	-1.15235	0.399781	-2.88246	0.00394579	0.0710608
ENSG00000169762	TAPT1	6598.15	-1.15217	0.440761	-2.61404	0.00894794	0.112393
ENSG00000166762	CATSPER2	97.9757	-1.15147	0.40458	-2.84608	0.00442608	0.0759494
ENSG00000234645	YWHAEP5	53.2799	1.14946	0.222363	5.16929	2.35e-07	0.000118422
ENSG00000058453	CROCC	1677.79	-1.14926	0.282957	-4.0616	4.87e-05	0.00455729
ENSG00000228672	PROB1	517.725	-1.14915	0.446103	-2.57596	0.00999609	0.119061
ENSG00000280649	AC245100.8	146.75	-1.14871	0.378202	-3.0373	0.00238705	0.0528274
ENSG00000178971	CTC1	1222.24	-1.14821	0.370812	-3.09649	0.00195827	0.0473044
ENSG00000023330	ALAS1	4005.47	1.14743	0.398918	2.87635	0.00402304	0.0718762
ENSG00000228393	LINC01004	60.4978	-1.14673	0.37192	-3.08327	0.00204737	0.0485651
ENSG00000275774	HNRNPCL2	15.516	1.14666	0.32691	3.50756	0.000452241	0.0188836
ENSG00000198026	ZNF335	3144.96	-1.14578	0.33804	-3.38949	0.000700233	0.0253306
ENSG00000118922	KLF12	317.035	-1.14472	0.406809	-2.8139	0.0048944	0.0806416
ENSG00000241127	YAE1D1	314.896	1.14267	0.412203	2.77211	0.00556936	0.0867499
ENSG00000181404	WASHC1	221.945	-1.14226	0.249446	-4.5792	4.67e-06	0.000988633
ENSG00000104881	PPP1R13L	102.106	-1.14169	0.383924	-2.97374	0.0029419	0.0597144
ENSG00000166128	RAB8B	4718.87	1.1401	0.416245	2.739	0.00616264	0.091204
ENSG00000175061	LRRC75A-AS1	11204.3	1.13994	0.346748	3.28751	0.00101079	0.0320437
ENSG00000166130	IKBIP	1072.76	1.1384	0.347782	3.27333	0.00106289	0.0329202
ENSG00000137070	IL11RA	294.516	-1.13699	0.39769	-2.85898	0.00425005	0.0740756
ENSG00000076984	MAP2K7	344.05	-1.13569	0.333029	-3.41019	0.000649188	0.0240496
ENSG00000283544	ABBA01000935.2	10.7657	1.13523	0.430064	2.63969	0.00829825	0.108
ENSG00000267493	CIRBP-AS1	92.486	-1.13383	0.387322	-2.92736	0.00341858	0.0650956
ENSG00000259238	AC092755.2	144.196	-1.1337	0.424618	-2.66993	0.0075868	0.102522
ENSG00000175606	TMEM70	3322.52	1.13151	0.398616	2.8386	0.0045312	0.0771359
ENSG00000152518	ZFP36L2	174977	-1.1295	0.404303	-2.79369	0.00521107	0.0831865
ENSG00000215769	ARHGAP27P1-BPTFP1-KPNA2P3	17.8908	-1.12938	0.429125	-2.63182	0.00849287	0.109132
ENSG00000059915	PSD	200.199	-1.12857	0.372821	-3.02711	0.00246903	0.0540109
ENSG00000275131	AC241952.1	187.586	-1.12673	0.391194	-2.88024	0.00397372	0.0713001
ENSG00000185485	SDHAP1	1152.61	-1.12651	0.381591	-2.95214	0.00315584	0.0624523
ENSG00000074755	ZZEF1	1424.73	-1.1265	0.323214	-3.48532	0.000491544	0.0200102
ENSG00000215302	AC127502.1	320.681	-1.1245	0.377063	-2.98226	0.00286129	0.0586073
ENSG00000171456	ASXL1	3486.11	-1.12375	0.34659	-3.24229	0.00118572	0.0351509
ENSG00000170004	CHD3	1814.88	-1.12346	0.279495	-4.0196	5.83e-05	0.00516357
ENSG00000167280	ENGASE	1870.94	-1.12344	0.333047	-3.37322	0.000742942	0.0263857
ENSG00000178188	SH2B1	518.789	-1.12338	0.190231	-5.90535	3.52e-09	3.81e-06
ENSG00000065357	DGKA	2343.4	-1.12284	0.351861	-3.19113	0.00141716	0.0393381
ENSG00000271043	MTRNR2L2	714.721	-1.12184	0.366473	-3.06119	0.00220459	0.0509391
ENSG00000100592	DAAM1	1411.47	1.1216	0.373857	3.00006	0.00269926	0.0567194
ENSG00000189089	RIMKLBP1	26.2917	-1.12104	0.40945	-2.73792	0.00618291	0.0913269
ENSG00000279583	AC009086.3	82.5653	-1.12082	0.403809	-2.77561	0.00550981	0.0863055
ENSG00000171928	TVP23B	1946.85	1.11965	0.266995	4.19353	2.75e-05	0.00312356
ENSG00000229204	PTGES3P3	45.1791	1.11774	0.260492	4.29086	1.78e-05	0.0023784
ENSG00000077044	DGKD	3911.32	-1.11722	0.257906	-4.33189	1.48e-05	0.00212859
ENSG00000136807	CDK9	7432.18	-1.11704	0.318037	-3.51229	0.000444262	0.0187108
ENSG00000141298	SSH2	1462.33	-1.11517	0.396529	-2.81233	0.00491844	0.080845
ENSG00000226544	RPL7P22	18.6193	1.11484	0.431981	2.58075	0.0098585	0.117999
ENSG00000106246	PTCD1	210.033	-1.11448	0.373318	-2.98533	0.00283269	0.0582255
ENSG00000232454	AL138752.1	21.2307	1.11254	0.263368	4.22429	2.4e-05	0.00285955
ENSG00000183506	PI4KAP2	1489.14	-1.11185	0.391422	-2.84053	0.00450389	0.0767604
ENSG00000176018	LYSMD3	2254.54	1.11071	0.266825	4.1627	3.15e-05	0.00340473
ENSG00000270015	AC087481.3	207.6	-1.11016	0.425273	-2.61047	0.00904172	0.113134
ENSG00000141258	SGSM2	2880.16	-1.10992	0.296429	-3.7443	0.0001809	0.0108715
ENSG00000126012	KDM5C	5384.74	-1.10674	0.262113	-4.22237	2.42e-05	0.00286492
ENSG00000155034	FBXL18	285.52	-1.10648	0.369008	-2.99853	0.00271286	0.0569232
ENSG00000234718	AC007161.1	15.0364	1.10644	0.409535	2.7017	0.00689869	0.0971287
ENSG00000255444	CYCSP27	35.2765	1.10631	0.353536	3.12926	0.00175246	0.0443985
ENSG00000142556	ZNF614	1310.65	1.10462	0.275344	4.01178	6.03e-05	0.00525799
ENSG00000188566	NDOR1	944.629	-1.10422	0.27189	-4.06129	4.88e-05	0.00455729
ENSG00000127586	CHTF18	3744.88	-1.10422	0.333766	-3.30836	0.000938433	0.0305111
ENSG00000253785	AC008429.2	104.326	1.10301	0.283898	3.88525	0.000102227	0.00748868
ENSG00000263956	NBPF11	652.924	-1.10294	0.327305	-3.36976	0.000752348	0.0264728
ENSG00000123066	MED13L	4503.2	-1.10147	0.33972	-3.24228	0.00118577	0.0351509
ENSG00000068831	RASGRP2	12928.5	-1.10126	0.2259	-4.87498	1.09e-06	0.000334805
ENSG00000116852	KIF21B	650.428	-1.10109	0.400504	-2.74925	0.00597313	0.089809
ENSG00000112659	CUL9	1318.99	-1.10022	0.307841	-3.574	0.000351569	0.0161066
ENSG00000163281	GNPDA2	1346.26	1.09962	0.270503	4.06508	4.8e-05	0.00455729
ENSG00000168071	CCDC88B	3428.19	-1.09798	0.354129	-3.10052	0.00193183	0.0468982
ENSG00000183495	EP400	675.011	-1.0935	0.251829	-4.34223	1.41e-05	0.00205103
ENSG00000101057	MYBL2	13523.2	-1.09322	0.385775	-2.83383	0.00459944	0.0780249
ENSG00000116151	MORN1	360.438	-1.09246	0.240999	-4.53306	5.81e-06	0.00112268
ENSG00000116044	NFE2L2	8210.7	1.09241	0.285424	3.82731	0.000129553	0.00868149
ENSG00000135596	MICAL1	5044.6	-1.09203	0.405275	-2.69454	0.0070485	0.0981715
ENSG00000184154	LRTOMT	130.809	-1.09175	0.332683	-3.28166	0.00103196	0.0323293
ENSG00000132718	SYT11	1668	-1.09141	0.345587	-3.15812	0.00158791	0.0418891
ENSG00000185947	ZNF267	2711.29	1.09021	0.397255	2.74437	0.0060627	0.0902274
ENSG00000104549	SQLE	2549.45	1.08501	0.267074	4.06259	4.85e-05	0.00455729
ENSG00000169193	CCDC126	833.929	1.08457	0.303271	3.57624	0.000348575	0.0160967
ENSG00000214189	ZNF788P	598.575	1.08438	0.414235	2.61779	0.00885013	0.111893
ENSG00000188878	FBF1	203.585	-1.08411	0.236169	-4.59041	4.42e-06	0.00095074
ENSG00000167548	KMT2D	1567.25	-1.08221	0.323859	-3.34162	0.000832913	0.0280475
ENSG00000065911	MTHFD2	2327.31	1.0822	0.221091	4.89481	9.84e-07	0.000319571
ENSG00000231799	PA2G4P6	66.4912	-1.08057	0.254817	-4.24059	2.23e-05	0.00271708
ENSG00000132716	DCAF8	1736.24	-1.08055	0.273974	-3.94399	8.01e-05	0.00649536
ENSG00000006025	OSBPL7	1025.8	-1.08036	0.298036	-3.62494	0.000289031	0.014643
ENSG00000164117	FBXO8	849.961	1.07888	0.298642	3.61263	0.000303103	0.0149652
ENSG00000213051	RPL5P5	35.3386	1.07839	0.418175	2.5788	0.00991435	0.118425
ENSG00000078596	ITM2A	12781.1	1.0783	0.359802	2.99693	0.0027271	0.0570991
ENSG00000186272	ZNF17	215.241	1.07813	0.35538	3.03373	0.00241549	0.0531847
ENSG00000043143	JADE2	1833.28	-1.07537	0.318451	-3.37689	0.000733111	0.0261638
ENSG00000134108	ARL8B	6766.24	1.07461	0.198014	5.42693	5.73e-08	3.64e-05
ENSG00000144040	SFXN5	997.327	-1.07392	0.268773	-3.99565	6.45e-05	0.00553009
ENSG00000133740	E2F5	332.746	-1.07349	0.299145	-3.58853	0.000332545	0.0157709
ENSG00000168116	KIAA1586	1472.82	1.07208	0.272868	3.92893	8.53e-05	0.00672914
ENSG00000115415	STAT1	11977.3	1.06977	0.403432	2.65167	0.00800957	0.105933
ENSG00000116711	PLA2G4A	773.765	1.06768	0.380679	2.80468	0.00503672	0.0818789
ENSG00000104859	CLASRP	2469.82	-1.06747	0.244248	-4.37045	1.24e-05	0.00190844
ENSG00000078687	TNRC6C	552.422	-1.06701	0.379989	-2.808	0.004985	0.0814539
ENSG00000233229	CNOT7P1	81.9029	1.06692	0.295586	3.60951	0.000306781	0.0150704
ENSG00000197694	SPTAN1	4806.47	-1.06689	0.316021	-3.376	0.000735469	0.0261948
ENSG00000099331	MYO9B	6541.79	-1.06508	0.315873	-3.37188	0.000746569	0.0264226
ENSG00000155304	HSPA13	4491.67	1.06417	0.264174	4.02832	5.62e-05	0.00504613
ENSG00000279253	AL121753.2	153.193	-1.06382	0.362229	-2.93687	0.00331548	0.0643908
ENSG00000160796	NBEAL2	2855.19	-1.06367	0.284078	-3.7443	0.000180895	0.0108715
ENSG00000163297	ANTXR2	5068.26	1.06362	0.341772	3.11207	0.00185782	0.0458633
ENSG00000158769	F11R	2689.98	1.06352	0.332426	3.19926	0.0013778	0.0386113
ENSG00000196367	TRRAP	1188.88	-1.0625	0.383198	-2.77272	0.00555895	0.0867499
ENSG00000186716	BCR	18378.7	-1.06196	0.306581	-3.46389	0.000532432	0.021002
ENSG00000249087	ZNF436-AS1	145.471	-1.06057	0.321443	-3.29941	0.000968893	0.0311206
ENSG00000236144	TMEM147-AS1	660.299	-1.05974	0.376012	-2.81836	0.00482704	0.0800281
ENSG00000249592	AC139887.2	236.361	-1.05958	0.34116	-3.10582	0.00189752	0.0464121
ENSG00000095564	BTAF1	3014.15	-1.05957	0.374561	-2.82882	0.00467204	0.0786289
ENSG00000140853	NLRC5	4857.42	-1.05953	0.357587	-2.96301	0.0030465	0.0612002
ENSG00000135905	DOCK10	1706.53	-1.0592	0.300685	-3.52263	0.000427284	0.0182856
ENSG00000104671	DCTN6	1386.52	1.05912	0.277744	3.8133	0.000137123	0.00898649
ENSG00000198093	ZNF649	772.755	1.05897	0.282127	3.75351	0.000174378	0.0105965
ENSG00000155097	ATP6V1C1	2125.49	1.05796	0.367464	2.87907	0.00398844	0.0714764
ENSG00000215375	MYL5	367.681	-1.05569	0.308619	-3.42069	0.00062463	0.0234068
ENSG00000115977	AAK1	932.849	-1.05388	0.302224	-3.48707	0.000488335	0.0199835
ENSG00000066926	FECH	5831.97	1.05292	0.374422	2.81213	0.00492148	0.080845
ENSG00000003756	RBM5	3480.62	-1.05264	0.367038	-2.86793	0.00413167	0.0730136
ENSG00000146556	WASH2P	192.266	-1.05179	0.309751	-3.39561	0.000684756	0.0250184
ENSG00000161996	WDR90	1853.23	-1.05149	0.360904	-2.91349	0.00357409	0.0666672
ENSG00000064607	SUGP2	4092.53	-1.05144	0.289739	-3.62892	0.000284612	0.0145182
ENSG00000205100	HSP90AA4P	21.486	1.05052	0.290556	3.61554	0.000299726	0.0148991
ENSG00000249215	NCOA4P4	102.812	1.04927	0.316904	3.31099	0.000929662	0.0303284
ENSG00000112941	TENT4A	780.984	-1.04874	0.325489	-3.22205	0.00127276	0.0367603
ENSG00000145819	ARHGAP26	1550.22	-1.04753	0.38118	-2.74812	0.0059939	0.0899252
ENSG00000131018	SYNE1	1858.62	-1.04581	0.317172	-3.29731	0.000976166	0.0312855
ENSG00000215041	NEURL4	230.703	-1.04428	0.356758	-2.92713	0.00342107	0.0651005
ENSG00000104412	EMC2	821.634	1.04069	0.292209	3.56146	0.000368803	0.0166077
ENSG00000152223	EPG5	639.994	-1.03892	0.383576	-2.70851	0.00675869	0.0960845
ENSG00000229927	RHEBP1	23.3746	1.03829	0.39085	2.65648	0.00789601	0.105001
ENSG00000077097	TOP2B	17914.1	-1.0371	0.385511	-2.69019	0.00714113	0.0989702
ENSG00000179820	MYADM	17481.6	1.03621	0.333347	3.10851	0.00188032	0.0462017
ENSG00000143515	ATP8B2	1981.93	-1.03593	0.254907	-4.06396	4.82e-05	0.00455729
ENSG00000119523	ALG2	3425.99	1.03525	0.332787	3.11086	0.00186543	0.0459735
ENSG00000122966	CIT	772.689	-1.03461	0.392315	-2.6372	0.00835937	0.108204
ENSG00000139625	MAP3K12	355.525	-1.03448	0.264042	-3.91784	8.93e-05	0.00685442
ENSG00000188512	AF279873.1	79.7048	1.03416	0.237617	4.3522	1.35e-05	0.0019896
ENSG00000227232	WASH7P	195.03	-1.03386	0.314597	-3.28631	0.00101508	0.0321016
ENSG00000215482	CALM2P3	248.783	1.03371	0.253884	4.07158	4.67e-05	0.00448963
ENSG00000072274	TFRC	18115.5	1.03365	0.350194	2.95164	0.00316095	0.0624832
ENSG00000117155	SSX2IP	2422.56	1.0332	0.268458	3.84864	0.000118777	0.00813053
ENSG00000244490	RWDD4P1	22.4629	1.03313	0.281346	3.67211	0.000240552	0.0130206
ENSG00000048471	SNX29	1077.81	-1.03192	0.35935	-2.87164	0.00408352	0.0724254
ENSG00000129480	DTD2	642.154	1.03095	0.371242	2.77703	0.00548588	0.086023
ENSG00000242692	RPS27AP1	58.7889	1.03095	0.275735	3.7389	0.000184826	0.0109574
ENSG00000163945	UVSSA	891.957	-1.02941	0.306742	-3.35595	0.000790943	0.0271344
ENSG00000198898	CAPZA2	21267.7	1.02922	0.237167	4.33964	1.43e-05	0.0020651
ENSG00000146826	C7orf43	405.803	-1.02857	0.364642	-2.82076	0.00479104	0.0795807
ENSG00000115514	TXNDC9	2042.19	1.0264	0.186306	5.50922	3.6e-08	2.42e-05
ENSG00000198771	RCSD1	13654.1	-1.02589	0.382901	-2.67926	0.00737852	0.101015
ENSG00000170191	NANP	785.084	1.02545	0.276454	3.7093	0.00020783	0.0118551
ENSG00000268785	RPL7P50	23.0834	1.02498	0.374311	2.7383	0.00617569	0.0913269
ENSG00000077380	DYNC1I2	2121.85	1.02464	0.247395	4.1417	3.45e-05	0.00361164
ENSG00000241095	CYP51A1P1	33.7145	1.02332	0.284306	3.59936	0.000319005	0.0154119
ENSG00000204463	BAG6	2109.48	-1.0232	0.149185	-6.85861	6.95e-12	2.03e-08
ENSG00000210082	MT-RNR2	515717	-1.02274	0.376901	-2.71356	0.00665645	0.0953264
ENSG00000136897	MRPL50	1576.6	1.01774	0.278734	3.65131	0.000260905	0.0136359
ENSG00000162104	ADCY9	368.996	-1.01772	0.291046	-3.49678	0.000470909	0.0194961
ENSG00000100744	GSKIP	2031.14	1.01701	0.238531	4.26364	2.01e-05	0.00257832
ENSG00000196628	TCF4	10718.8	-1.01638	0.347933	-2.92119	0.00348699	0.0659861
ENSG00000215284	AL512633.1	31.8199	1.01486	0.353323	2.87234	0.00407449	0.0723756
ENSG00000279457	FO538757.1	337.516	-1.0148	0.263459	-3.85182	0.000117244	0.00806336
ENSG00000233588	CYP51A1P2	39.1944	1.0142	0.265299	3.82285	0.000131916	0.0088031
ENSG00000168237	GLYCTK	389.606	-1.01386	0.222425	-4.55824	5.16e-06	0.00105438
ENSG00000234616	JRK	553.217	-1.01366	0.384292	-2.63775	0.00834591	0.1082
ENSG00000100330	MTMR3	245.678	-1.01351	0.296162	-3.42215	0.000621275	0.023311
ENSG00000108773	KAT2A	2320.98	-1.01256	0.338674	-2.98979	0.00279166	0.0577372
ENSG00000204764	RANBP17	283.544	1.01201	0.389851	2.59589	0.00943472	0.11552
ENSG00000260404	AC110079.1	532.763	-1.0111	0.379243	-2.6661	0.00767376	0.103172
ENSG00000166532	RIMKLB	2944.04	-1.01077	0.315296	-3.20579	0.00134693	0.0380381
ENSG00000162616	DNAJB4	911.109	1.01008	0.282306	3.57795	0.000346299	0.0160967
ENSG00000163684	RPP14	309.372	1.00977	0.249325	4.05	5.12e-05	0.004693
ENSG00000197653	DNAH10	97.6555	-1.00854	0.386712	-2.60799	0.00910759	0.113452
ENSG00000176994	SMCR8	821.144	-1.00844	0.305215	-3.30405	0.000952991	0.0308472
ENSG00000105397	TYK2	7198.37	-1.00811	0.204742	-4.92382	8.49e-07	0.000285138
ENSG00000099949	LZTR1	502.389	-1.00788	0.282951	-3.56203	0.000368003	0.0165993
ENSG00000179766	ATP8B5P	75.5882	1.00715	0.366654	2.74688	0.00601646	0.0899892
ENSG00000255121	AP003392.4	125.528	-1.00571	0.373872	-2.68999	0.00714534	0.0989816
ENSG00000134970	TMED7	3405.98	1.00458	0.222718	4.51054	6.47e-06	0.00119621
ENSG00000214925	AC234778.1	13.8526	1.00314	0.372979	2.68953	0.00715518	0.099044
ENSG00000032444	PNPLA6	1651.48	-1.0027	0.198427	-5.05323	4.34e-07	0.000175929
ENSG00000065154	OAT	9403.82	1.00128	0.241568	4.1449	3.4e-05	0.00358724
ENSG00000260565	ERVK13-1	534.639	-1.00081	0.381915	-2.62051	0.00877988	0.111352
ENSG00000118058	KMT2A	5247.9	-1.00078	0.374609	-2.67153	0.00755067	0.102175
ENSG00000232442	MHENCR	437.476	-1.00047	0.31328	-3.19355	0.00140536	0.0391585
