# Supplementary material for: Molecular profiling of pre- and post- 5-azacytidine myelodysplastic syndrome samples identifies predictors of response
Source: Front Oncol. 2024 Sep 23;14:1438052. doi: 10.3389/fonc.2024.1438052 (PMC11456566; doi:10.3389/fonc.2024.1438052)
Supplement: Supplementary Table 6 — List of genes differentially expressed between pre- and post-treatment blast responders (BL-R). [file Table6.xlsx]

## Sheet: Sheet1
Supplementary Table 6. List of genes differentially expressed between pre and post-treatment blast responders
Gene Symbol	baseMean	log2FoldChange_BL-R_pre_vs_post	lfcSE	stat	pvalue	padj
2023-12-01	0	NA	NA	NA	NA	NA
2023-03-01	1318.67	-2.98746	0.837755	-3.56603	0.000362428	0.00918444
2023-09-01	682.841	-0.0638466	0.397288	-0.160706	0.872325	0.961607
2023-03-10	0.164111	-0.704643	3.15474	-0.22336	0.823255	NA
2023-09-10	284.587	-4.09258	1.35682	-3.0163	0.00255878	0.0398293
2023-03-11	0	NA	NA	NA	NA	NA
2023-09-11	5410	-0.590859	0.522596	-1.13062	0.258214	0.623986
2023-09-12	2.17566	-0.579479	3.10367	-0.186708	0.85189	NA
2023-09-14	0.489957	-0.485951	3.11353	-0.156077	0.875972	NA
2023-03-02	4176.83	-0.962196	0.722251	-1.33222	0.182789	0.534584
2023-09-02	14368.7	-0.454757	0.471437	-0.964618	0.334736	0.699954
2023-03-03	522.917	-0.404492	0.601494	-0.67248	0.501278	0.806203
2023-09-03	9.63202	-1.93289	3.04829	-0.634089	0.526023	0.81888
2023-03-04	2.15408	-1.56381	3.10222	-0.504094	0.614195	NA
2023-09-04	241.864	-5.73633	1.04277	-5.50108	3.77e-08	5.71e-06
2023-03-05	3454.14	0.626735	0.402002	1.55904	0.118988	0.435295
2023-09-05	18.2133	0.466127	1.10064	0.423504	0.671927	0.889095
2023-03-06	6001.51	0.965106	0.578446	1.66845	0.095227	0.38771
2023-09-06	14258.6	0.229482	0.430527	0.533025	0.594016	0.854632
2023-03-07	8535.07	0.256321	0.293709	0.872704	0.382825	0.734169
2023-09-07	15194	0.0143188	0.306213	0.046761	0.962704	0.988901
2023-03-08	1750.28	-0.225736	0.4963	-0.454838	0.649226	0.879532
2023-09-08	159.49	-0.212777	0.564493	-0.376936	0.706221	0.906086
2023-03-09	148.589	-0.478159	0.612079	-0.781204	0.434682	0.76925
2023-09-09	4863.1	-0.432387	0.403877	-1.07059	0.284354	0.652026
A1BG	15.8752	-1.7814	1.67392	-1.06421	0.287235	0.655122
A1BG-AS1	70.6439	-0.559354	0.741971	-0.753876	0.450924	0.777966
A1CF	0.654791	1.65122	3.10566	0.531682	0.594947	NA
A2M	14409.5	-4.7574	0.759287	-6.26562	3.71e-10	1.21e-07
A2M-AS1	78.7431	-0.00572926	0.887899	-0.00645261	0.994852	0.998867
A2ML1	13.9706	-4.99616	2.1196	-2.35712	0.0184172	0.150854
A2ML1-AS1	0	NA	NA	NA	NA	NA
A2ML1-AS2	0.222199	-0.281379	3.15076	-0.089305	0.92884	NA
A2MP1	3.77448	2.1399	2.2705	0.942477	0.345948	NA
A3GALT2	0.67764	-0.178755	3.08315	-0.0579781	0.953766	NA
A4GALT	446.762	-2.14573	1.02693	-2.08947	0.0366658	0.228106
A4GNT	0.246447	-0.944295	3.1424	-0.300501	0.763795	NA
AAAS	2666.83	-0.425282	0.439384	-0.967906	0.333091	0.698989
AACS	736.147	0.60653	0.540531	1.1221	0.26182	0.628728
AACSP1	0.258888	0.733271	3.13116	0.234185	0.814841	NA
AADAC	0	NA	NA	NA	NA	NA
AADACL2	0.194166	0.706181	3.13984	0.22491	0.822049	NA
AADACL2-AS1	0.862565	-1.02705	3.11336	-0.329885	0.741487	NA
AADACL3	0.477349	-1.21083	3.12245	-0.387783	0.698176	NA
AADACL4	0	NA	NA	NA	NA	NA
AADACP1	1.26468	-1.76072	3.09169	-0.569501	0.569016	NA
AADAT	344.481	0.404257	0.678437	0.595865	0.551265	0.833037
AAED1	2598.68	-0.483512	0.312438	-1.54755	0.121731	0.440171
AAGAB	2665.63	0.40293	0.378309	1.06508	0.286838	0.655042
AAK1	736.569	0.364765	0.46053	0.792055	0.428329	0.765865
AAMDC	96.6398	-0.0559121	0.468759	-0.119277	0.905056	0.971218
AAMP	6408.74	0.0680491	0.280059	0.242981	0.80802	0.942016
AANAT	5.47258	-4.40606	3.0025	-1.46746	0.14225	NA
AAR2	3733.47	-0.0105621	0.273038	-0.0386836	0.969143	0.99139
AARD	7.16201	-2.7213	2.08505	-1.30515	0.191842	NA
AARS	2999.61	-0.710014	0.630673	-1.1258	0.260249	0.627004
AARS2	609.102	0.0563235	0.452939	0.124351	0.901037	0.969459
AARSD1	21.734	2.31433	0.929522	2.4898	0.0127814	0.11917
AARSP1	0	NA	NA	NA	NA	NA
AASDH	383.378	0.748106	0.520246	1.43799	0.150438	0.488997
AASDHPPT	2129.07	0.0241532	0.427364	0.0565166	0.95493	0.986469
AASS	162.388	-1.12138	1.24257	-0.902474	0.366805	0.721746
AATBC	22.7386	-0.676932	1.29895	-0.521137	0.602272	0.858545
AATF	3845.34	-0.148877	0.334246	-0.445413	0.656021	0.88204
AATK	343.878	-0.208746	0.561397	-0.371834	0.710017	0.907494
AB015752.1	3.92046	0.0966335	3.04307	0.0317553	0.974667	NA
ABALON	73.6195	-0.230772	0.699181	-0.33006	0.741354	0.920527
ABAT	144.527	-1.63451	0.678349	-2.40954	0.0159727	0.137493
ABBA01000935.2	7.15991	-0.406153	0.951561	-0.426828	0.669504	NA
ABBA01006766.1	0	NA	NA	NA	NA	NA
ABCA1	1530.77	-0.239452	0.925431	-0.258746	0.795831	0.937169
ABCA10	4.92385	1.05874	2.70972	0.390717	0.696006	NA
ABCA11P	4.81364	0.0312602	1.98662	0.0157353	0.987446	NA
ABCA12	1.88525	-0.155882	3.06852	-0.0508004	0.959485	NA
ABCA13	68.628	-6.22498	1.38792	-4.4851	7.29e-06	0.000402716
ABCA17P	11.682	1.46057	1.83595	0.795538	0.4263	0.76423
ABCA2	887.33	0.347271	0.502074	0.691673	0.489143	0.800332
ABCA3	268.487	-1.81859	0.715084	-2.54318	0.0109849	0.106907
ABCA4	4.31278	-1.87451	3.06167	-0.612251	0.540372	NA
ABCA5	136.601	-0.626606	0.894884	-0.700209	0.483797	0.796869
ABCA6	21.1881	-1.9538	0.996149	-1.96135	0.0498376	0.273571
ABCA7	1121.76	-0.687575	0.476199	-1.44388	0.148772	0.486406
ABCA8	63.0473	-5.24807	1.02142	-5.13801	2.78e-07	2.79e-05
ABCA9	1.19663	-2.19794	3.05618	-0.719179	0.472031	NA
ABCA9-AS1	0.679183	-1.14895	3.11408	-0.368954	0.712162	NA
ABCB1	1544.58	1.03905	0.433749	2.39551	0.0165971	0.141278
ABCB10	3893.79	-0.98739	0.485595	-2.03336	0.0420161	0.246411
ABCB10P1	7.37922	-0.454014	1.36923	-0.331583	0.740204	NA
ABCB10P3	3.80372	-1.81314	1.31145	-1.38255	0.166804	NA
ABCB10P4	8.7631	-1.89298	1.38224	-1.3695	0.170843	NA
ABCB11	5.70383	-0.965127	3.0729	-0.314077	0.753463	NA
ABCB4	16.2767	0.0932494	1.00425	0.092855	0.926019	0.978033
ABCB5	0	NA	NA	NA	NA	NA
ABCB6	20.1589	-2.43932	1.15237	-2.11679	0.0342778	0.21885
ABCB7	1064.08	0.172064	0.35222	0.488513	0.625186	0.868191
ABCB8	1117.92	-0.889127	0.462631	-1.92189	0.0546194	0.288756
ABCB9	349.663	-1.46576	0.983011	-1.49109	0.135937	0.465235
ABCC1	2983.35	0.814524	0.45695	1.78252	0.074664	0.34158
ABCC10	385.968	-0.852618	0.652714	-1.30627	0.191462	0.545879
ABCC11	12.7185	0.0317586	1.52332	0.0208482	0.983367	0.99497
ABCC12	0	NA	NA	NA	NA	NA
ABCC13	46.5732	-1.9739	1.70015	-1.16102	0.245633	0.608005
ABCC2	47.6931	0.0970151	1.33599	0.0726164	0.942111	0.982976
ABCC3	2531.1	-2.8437	1.00327	-2.83443	0.00459081	0.0596506
ABCC4	2787.09	-0.932297	0.626558	-1.48796	0.13676	0.46641
ABCC5	965.563	-0.14395	0.584782	-0.24616	0.805558	0.941072
ABCC5-AS1	0.689861	0.993216	3.10724	0.319645	0.749237	NA
ABCC6	138.417	0.692781	0.710475	0.975096	0.329513	0.695933
ABCC6P1	26.6796	0.541248	1.0166	0.532411	0.594441	0.854683
ABCC6P2	3.92531	0.943944	1.49521	0.63131	0.527838	NA
ABCC8	0	NA	NA	NA	NA	NA
ABCC9	22.5146	-2.60295	1.82069	-1.42965	0.152818	0.492271
ABCD1	441.083	-1.36807	0.628428	-2.17697	0.0294829	0.201064
ABCD1P2	3.95903	0.526008	3.10124	0.169612	0.865315	NA
ABCD1P3	0	NA	NA	NA	NA	NA
ABCD1P4	0.136385	-0.939874	3.14451	-0.298894	0.765021	NA
ABCD1P5	0	NA	NA	NA	NA	NA
ABCD2	21.4084	-0.518591	2.37845	-0.218037	0.8274	0.948837
ABCD3	1918	0.0311877	0.422142	0.0738796	0.941106	0.982748
ABCD4	1731.19	0.0990579	0.516494	0.191789	0.847908	0.955736
ABCE1	5475.78	-0.167032	0.421612	-0.396175	0.691976	0.90047
ABCF1	3207.55	0.80107	0.363716	2.20246	0.027633	0.193995
ABCF2	483.963	-0.661331	0.490129	-1.3493	0.177241	0.527396
ABCF2P1	4.25166	1.58814	1.85164	0.857696	0.39106	NA
ABCF2P2	0	NA	NA	NA	NA	NA
ABCF3	2669.42	0.400986	0.474015	0.845936	0.397589	0.746274
ABCG1	3992.86	-0.414974	0.753792	-0.550516	0.581966	0.848475
ABCG2	183.932	-0.414729	0.533302	-0.777664	0.436767	0.770609
ABCG4	9.4074	-2.51747	3.04528	-0.826678	0.40842	0.754242
ABCG5	0.545541	-1.21983	3.11987	-0.390988	0.695806	NA
ABCG8	2.13028	1.31522	3.08711	0.426035	0.670082	NA
ABHD1	59.5552	0.998895	0.548416	1.82142	0.0685431	0.326359
ABHD10	2241.3	0.0333654	0.340426	0.0980108	0.921924	0.977044
ABHD11	523.72	-1.44355	0.851566	-1.69518	0.0900418	0.376382
ABHD11-AS1	11.1594	-1.01475	1.28878	-0.787372	0.431064	0.767216
ABHD12	3997.46	-0.32534	0.398874	-0.815646	0.414703	0.758731
ABHD12B	188.222	1.14596	0.848759	1.35016	0.176963	0.527193
ABHD13	2281.01	0.214403	0.313276	0.68439	0.493729	0.802103
ABHD14A	330.953	-0.902969	0.607264	-1.48695	0.137029	0.466448
ABHD14A-ACY1	1.45388	-2.06889	3.09693	-0.668047	0.504104	NA
ABHD14B	3557.79	-0.402089	0.370583	-1.08502	0.277914	0.645353
ABHD15	687.261	-0.690098	0.562042	-1.22784	0.219507	0.578441
ABHD15-AS1	0.458211	1.28803	3.12315	0.412415	0.680035	NA
ABHD16A	40.989	0.62782	0.815951	0.769434	0.441636	0.773698
ABHD16B	0	NA	NA	NA	NA	NA
ABHD17A	5464.82	-0.709644	0.356575	-1.99017	0.0465724	0.26257
ABHD17AP1	177.778	-0.782951	0.429379	-1.82345	0.0682353	0.325673
ABHD17AP3	46.847	-0.60552	0.476517	-1.27072	0.203828	0.558933
ABHD17AP4	24.7005	-0.694452	0.850123	-0.816885	0.413994	0.75837
ABHD17AP5	192.706	-0.330364	0.622004	-0.531128	0.59533	0.855145
ABHD17AP6	72.06	-0.873142	0.552837	-1.57938	0.114248	0.426005
ABHD17AP7	0	NA	NA	NA	NA	NA
ABHD17AP8	0	NA	NA	NA	NA	NA
ABHD17AP9	0	NA	NA	NA	NA	NA
ABHD17B	3655.57	0.35479	0.506808	0.700049	0.483897	0.796869
ABHD17C	3903.72	0.501869	0.638055	0.78656	0.43154	0.767216
ABHD18	529.548	0.823129	0.284211	2.89619	0.00377726	0.0518929
ABHD2	2487.72	0.0164231	0.408902	0.0401638	0.967963	0.991028
ABHD3	1002.78	-0.190268	0.345903	-0.550061	0.582278	0.848475
ABHD4	1886.75	-0.347053	0.557486	-0.622531	0.533593	0.823169
ABHD5	1252.94	-0.486649	0.467436	-1.0411	0.297828	0.667271
ABHD6	589.243	-2.78848	1.24065	-2.2476	0.0246016	0.180401
ABHD8	728.298	-0.665621	0.531899	-1.25141	0.210786	0.569028
ABI1	8078.57	0.0904271	0.336447	0.268771	0.788106	0.93582
ABI1P1	0	NA	NA	NA	NA	NA
ABI2	1526.81	-0.0204172	0.380588	-0.0536466	0.957217	0.986698
ABI3	1297.42	-2.16919	0.694281	-3.12437	0.00178188	0.0304527
ABI3BP	90.5628	-5.1628	1.24714	-4.13971	3.48e-05	0.00144723
ABL1	2447.55	0.771721	0.50624	1.52442	0.127404	0.450609
ABL2	507.584	0.981688	0.532325	1.84415	0.0651608	0.317396
ABLIM1	2618.04	-0.428409	0.628762	-0.681353	0.495648	0.803122
ABLIM2	13.3084	-4.53592	1.97866	-2.29242	0.0218811	0.168583
ABLIM3	1022.51	-7.53797	1.12127	-6.72271	1.78e-11	8.06e-09
ABO	653.526	0.235656	0.532748	0.44234	0.658243	0.883151
ABR	1462	-0.341997	0.429528	-0.796216	0.425906	0.763981
ABRA	3.2565	0.214965	2.4369	0.0882123	0.929708	NA
ABRACL	3241.38	-0.361385	0.402703	-0.897397	0.369507	0.723556
ABRAXAS1	346.623	0.588206	0.452707	1.29931	0.193838	0.548896
ABRAXAS2	1513.05	0.0548449	0.388164	0.141293	0.887639	0.966583
ABT1	4356.12	0.265957	0.403774	0.658678	0.510103	0.81089
ABT1P1	0	NA	NA	NA	NA	NA
ABTB1	2862.96	-1.04457	0.496465	-2.10402	0.035377	0.223131
ABTB2	134.998	-1.57902	1.00173	-1.5763	0.114957	0.427317
AC000032.1	0.15093	-0.96098	3.14559	-0.305501	0.759985	NA
AC000035.1	0	NA	NA	NA	NA	NA
AC000036.1	2.69311	-1.74431	2.991	-0.583187	0.559768	NA
AC000041.1	0	NA	NA	NA	NA	NA
AC000041.2	0	NA	NA	NA	NA	NA
AC000058.1	0	NA	NA	NA	NA	NA
AC000061.1	0	NA	NA	NA	NA	NA
AC000067.1	0	NA	NA	NA	NA	NA
AC000068.1	32.6527	1.17022	0.807788	1.44868	0.147428	0.484714
AC000068.2	0.349419	0.392956	3.11962	0.125963	0.899761	NA
AC000068.3	0	NA	NA	NA	NA	NA
AC000077.1	0	NA	NA	NA	NA	NA
AC000078.1	2.53167	-1.76207	3.08973	-0.570299	0.568475	NA
AC000081.1	0	NA	NA	NA	NA	NA
AC000089.1	149.55	0.249649	0.428205	0.583013	0.559885	0.8366
AC000093.1	0	NA	NA	NA	NA	NA
AC000095.1	0	NA	NA	NA	NA	NA
AC000095.2	0	NA	NA	NA	NA	NA
AC000099.1	0	NA	NA	NA	NA	NA
AC000111.1	0	NA	NA	NA	NA	NA
AC000111.2	0	NA	NA	NA	NA	NA
AC000120.1	0.815311	0.416501	3.10831	0.133996	0.893406	NA
AC000123.1	2.0131	0.610413	3.0333	0.201237	0.840513	NA
AC000123.2	0.932835	1.25009	3.0912	0.404402	0.685917	NA
AC000123.3	28.3971	-0.0261045	1.59073	-0.0164104	0.986907	0.995969
AC000124.1	0.232946	0.373771	3.12899	0.119454	0.904916	NA
AC000362.1	0	NA	NA	NA	NA	NA
AC000367.1	0.328222	-0.758103	3.12922	-0.242266	0.808574	NA
AC000372.1	0	NA	NA	NA	NA	NA
AC000374.1	0	NA	NA	NA	NA	NA
AC000403.1	2.63449	-2.04881	3.05578	-0.670469	0.502559	NA
AC001226.1	0.150242	0.561815	3.14458	0.178662	0.858203	NA
AC001226.2	7.71472	1.20437	2.40714	0.500332	0.616842	NA
AC002044.1	0.129444	0.576765	3.14535	0.183371	0.854507	NA
AC002044.2	3.8052	-2.28774	3.02282	-0.756822	0.449157	NA
AC002044.3	0	NA	NA	NA	NA	NA
AC002056.1	93.6341	0.985582	0.529476	1.86143	0.0626836	0.311119
AC002056.2	0	NA	NA	NA	NA	NA
AC002059.1	1.7119	0.274467	3.02866	0.0906231	0.927792	NA
AC002064.1	0	NA	NA	NA	NA	NA
AC002064.2	0	NA	NA	NA	NA	NA
AC002064.3	1.69233	1.55051	3.04132	0.509814	0.610181	NA
AC002066.1	0	NA	NA	NA	NA	NA
AC002069.1	0	NA	NA	NA	NA	NA
AC002069.2	0	NA	NA	NA	NA	NA
AC002070.1	17.1185	-0.128342	1.5884	-0.0807997	0.935601	0.981175
AC002074.1	1.75001	-0.0158452	3.05925	-0.00517943	0.995867	NA
AC002075.1	0	NA	NA	NA	NA	NA
AC002075.2	36.0948	0.380625	0.489925	0.776904	0.437215	0.771125
AC002076.1	0	NA	NA	NA	NA	NA
AC002076.2	1.28878	-1.79623	3.08122	-0.582959	0.559921	NA
AC002090.1	0	NA	NA	NA	NA	NA
AC002091.1	40.0664	-0.422159	1.02107	-0.413446	0.67928	0.894007
AC002091.2	48.7532	-0.637511	1.10189	-0.578562	0.562885	0.838347
AC002094.1	0	NA	NA	NA	NA	NA
AC002094.2	0	NA	NA	NA	NA	NA
AC002094.3	0	NA	NA	NA	NA	NA
AC002094.4	5.6637	0.381271	1.51667	0.251386	0.801516	NA
AC002094.5	4.74101	1.84426	1.38516	1.33145	0.183041	NA
AC002101.1	0	NA	NA	NA	NA	NA
AC002115.1	0	NA	NA	NA	NA	NA
AC002116.1	0	NA	NA	NA	NA	NA
AC002116.2	11.1225	0.447345	0.959981	0.465993	0.64122	0.87671
AC002127.1	0	NA	NA	NA	NA	NA
AC002127.2	0.377324	-1.11477	3.12442	-0.356794	0.721246	NA
AC002128.1	9.38276	2.95492	1.84025	1.60572	0.108336	0.414686
AC002128.2	1.5054	1.65401	3.04847	0.542571	0.587425	NA
AC002306.1	0.669163	0.179658	3.11058	0.057757	0.953942	NA
AC002310.1	81.0179	0.879477	0.917477	0.958581	0.33777	0.702557
AC002310.2	2.84515	3.80752	2.65104	1.43623	0.150936	NA
AC002310.3	19.028	0.442614	0.751286	0.589141	0.555766	0.834202
AC002310.4	0	NA	NA	NA	NA	NA
AC002310.5	0	NA	NA	NA	NA	NA
AC002310.6	23.2279	-0.692415	0.907372	-0.7631	0.445404	0.775227
AC002347.1	2.60689	-0.0546175	3.01347	-0.0181244	0.98554	NA
AC002347.2	0.136385	-0.939874	3.14451	-0.298894	0.765021	NA
AC002350.1	62.9152	1.16417	0.687684	1.69289	0.0904769	0.377386
AC002351.1	0	NA	NA	NA	NA	NA
AC002366.1	0	NA	NA	NA	NA	NA
AC002367.1	35.8035	-1.06019	0.599454	-1.7686	0.0769609	0.347246
AC002368.1	1.14957	1.75919	3.0933	0.568709	0.569554	NA
AC002375.1	0	NA	NA	NA	NA	NA
AC002378.1	0.234114	-0.812295	3.132	-0.259354	0.795362	NA
AC002381.1	0	NA	NA	NA	NA	NA
AC002383.1	0	NA	NA	NA	NA	NA
AC002384.1	21.6407	-1.94921	3.04474	-0.640189	0.52205	0.816966
AC002386.1	0	NA	NA	NA	NA	NA
AC002398.1	0.413019	1.15684	3.12286	0.370443	0.711053	NA
AC002398.2	0	NA	NA	NA	NA	NA
AC002400.1	0.328222	-0.758103	3.12922	-0.242266	0.808574	NA
AC002401.1	0	NA	NA	NA	NA	NA
AC002401.2	0.862565	-1.02705	3.11336	-0.329885	0.741487	NA
AC002401.3	0.123224	-0.734062	3.15698	-0.23252	0.816134	NA
AC002401.4	0.526536	-0.0259433	3.09743	-0.00837576	0.993317	NA
AC002407.1	0.737846	-1.22295	3.08099	-0.396934	0.691416	NA
AC002428.1	0	NA	NA	NA	NA	NA
AC002428.2	0	NA	NA	NA	NA	NA
AC002429.1	0	NA	NA	NA	NA	NA
AC002429.2	2.54778	0.258761	3.05307	0.0847544	0.932457	NA
AC002451.1	3.66195	0.0888686	3.08725	0.0287857	0.977035	NA
AC002451.2	0	NA	NA	NA	NA	NA
AC002454.1	453.658	-0.417059	0.950365	-0.438841	0.660777	0.883805
AC002456.1	7.60288	-1.47897	1.87331	-0.789495	0.429823	NA
AC002456.2	0	NA	NA	NA	NA	NA
AC002460.1	0	NA	NA	NA	NA	NA
AC002463.1	0	NA	NA	NA	NA	NA
AC002464.1	46.3278	-0.549889	0.62356	-0.881854	0.377856	0.729775
AC002465.1	0	NA	NA	NA	NA	NA
AC002467.1	71.8745	-0.130072	0.948147	-0.137186	0.890884	0.96708
AC002470.1	13.5822	-1.93892	1.8702	-1.03674	0.299857	0.669909
AC002470.2	0	NA	NA	NA	NA	NA
AC002472.1	0	NA	NA	NA	NA	NA
AC002472.2	0	NA	NA	NA	NA	NA
AC002472.3	0	NA	NA	NA	NA	NA
AC002472.4	0	NA	NA	NA	NA	NA
AC002480.1	0	NA	NA	NA	NA	NA
AC002480.2	0.657005	-1.65093	3.12705	-0.527951	0.597533	NA
AC002480.3	2.29868	-2.05626	3.07218	-0.669316	0.503294	NA
AC002480.4	0	NA	NA	NA	NA	NA
AC002486.1	0.15093	-0.96098	3.14559	-0.305501	0.759985	NA
AC002486.2	0	NA	NA	NA	NA	NA
AC002487.1	0	NA	NA	NA	NA	NA
AC002504.1	0.348194	1.29385	3.12581	0.413923	0.67893	NA
AC002511.1	1.64111	-0.807296	3.10573	-0.259938	0.794912	NA
AC002511.2	0.984665	-0.798502	3.10985	-0.256765	0.79736	NA
AC002511.3	0	NA	NA	NA	NA	NA
AC002519.1	0	NA	NA	NA	NA	NA
AC002519.2	2.75982	0.926848	2.41789	0.383329	0.701476	NA
AC002524.1	61.1941	0.0145807	0.454397	0.0320881	0.974402	0.992947
AC002525.1	7.10912	-1.67793	2.70316	-0.620731	0.534776	NA
AC002540.1	0	NA	NA	NA	NA	NA
AC002542.1	0	NA	NA	NA	NA	NA
AC002543.1	11.0382	2.1127	1.72378	1.22562	0.22034	0.579409
AC002545.1	3.16502	-2.29771	2.30119	-0.998485	0.318044	NA
AC002546.1	0.234114	-0.812295	3.132	-0.259354	0.795362	NA
AC002550.1	0	NA	NA	NA	NA	NA
AC002550.2	0	NA	NA	NA	NA	NA
AC002551.1	0.42828	-0.0784479	3.11397	-0.0251922	0.979902	NA
AC002553.1	23.5696	3.7782	1.17565	3.21372	0.00131029	0.024406
AC002553.2	2.75425	0.893836	1.90869	0.468299	0.639571	NA
AC002558.1	12.9345	0.448335	1.41734	0.316322	0.751758	0.925188
AC002558.2	5.7495	1.82995	1.70618	1.07254	0.283476	NA
AC002558.3	7.41276	0.614853	1.52577	0.40298	0.686963	NA
AC002563.1	0	NA	NA	NA	NA	NA
AC002984.1	1.1306	-0.142978	3.07217	-0.0465397	0.96288	NA
AC002985.1	0	NA	NA	NA	NA	NA
AC002996.1	0	NA	NA	NA	NA	NA
AC003001.1	0	NA	NA	NA	NA	NA
AC003001.2	0	NA	NA	NA	NA	NA
AC003002.1	0	NA	NA	NA	NA	NA
AC003002.2	0.678418	1.76927	3.11046	0.568814	0.569483	NA
AC003002.3	2.52359	1.55357	2.38148	0.652356	0.514172	NA
AC003005.1	0	NA	NA	NA	NA	NA
AC003005.2	4.28315	1.42904	2.41483	0.591779	0.553999	NA
AC003006.1	0	NA	NA	NA	NA	NA
AC003009.1	0	NA	NA	NA	NA	NA
AC003035.1	1.78906	-2.98502	3.04332	-0.980844	0.32667	NA
AC003035.2	0	NA	NA	NA	NA	NA
AC003043.1	0	NA	NA	NA	NA	NA
AC003043.2	4.36461	3.58992	3.02518	1.18668	0.235354	NA
AC003045.1	0	NA	NA	NA	NA	NA
AC003070.1	3.40307	1.68375	2.17001	0.775917	0.437798	NA
AC003070.2	0.492894	-0.999088	3.12283	-0.319931	0.749021	NA
AC003071.1	0	NA	NA	NA	NA	NA
AC003071.2	0	NA	NA	NA	NA	NA
AC003072.1	2.32072	1.42978	2.98919	0.478317	0.632425	NA
AC003080.1	0	NA	NA	NA	NA	NA
AC003084.1	0	NA	NA	NA	NA	NA
AC003087.1	0	NA	NA	NA	NA	NA
AC003092.1	3.35734	-0.750813	3.1024	-0.24201	0.808772	NA
AC003092.2	0	NA	NA	NA	NA	NA
AC003098.1	0	NA	NA	NA	NA	NA
AC003101.1	0	NA	NA	NA	NA	NA
AC003101.2	2.99519	-0.767704	2.63797	-0.291021	0.771035	NA
AC003101.3	0	NA	NA	NA	NA	NA
AC003102.1	129.824	0.269463	0.81132	0.332129	0.739792	0.91985
AC003659.1	0	NA	NA	NA	NA	NA
AC003666.1	0	NA	NA	NA	NA	NA
AC003669.1	3.28334	-0.0315818	1.54522	-0.0204384	0.983694	NA
AC003681.1	181.382	1.19699	0.694665	1.72312	0.0848674	0.364243
AC003682.1	0.862565	-1.02705	3.11336	-0.329885	0.741487	NA
AC003684.1	0	NA	NA	NA	NA	NA
AC003685.1	0	NA	NA	NA	NA	NA
AC003685.2	0.616134	1.27502	3.10225	0.410998	0.681074	NA
AC003686.1	0	NA	NA	NA	NA	NA
AC003687.1	0	NA	NA	NA	NA	NA
AC003688.1	0	NA	NA	NA	NA	NA
AC003688.2	0	NA	NA	NA	NA	NA
AC003956.1	21.2805	1.63013	1.44293	1.12973	0.25859	0.624653
AC003957.1	1.14023	1.62934	3.06841	0.531007	0.595414	NA
AC003958.1	0	NA	NA	NA	NA	NA
AC003958.2	0	NA	NA	NA	NA	NA
AC003965.1	8.89615	-6.2901	2.32925	-2.70048	0.00692395	0.0792509
AC003965.2	0	NA	NA	NA	NA	NA
AC003973.1	0	NA	NA	NA	NA	NA
AC003973.2	0.232946	0.373771	3.12899	0.119454	0.904916	NA
AC003973.3	26.0499	1.62041	1.8704	0.866344	0.386302	0.736319
AC003975.1	0	NA	NA	NA	NA	NA
AC003982.1	0	NA	NA	NA	NA	NA
AC003984.1	0	NA	NA	NA	NA	NA
AC003985.1	0	NA	NA	NA	NA	NA
AC003985.2	0	NA	NA	NA	NA	NA
AC003986.1	0	NA	NA	NA	NA	NA
AC003986.2	0	NA	NA	NA	NA	NA
AC003986.3	0	NA	NA	NA	NA	NA
AC003988.1	0	NA	NA	NA	NA	NA
AC003989.1	0	NA	NA	NA	NA	NA
AC003989.2	0.0754648	-0.711835	3.15405	-0.225689	0.821443	NA
AC003991.1	4.53442	1.98656	2.40546	0.825854	0.408887	NA
AC003991.2	12.4069	0.984519	0.996512	0.987965	0.32317	0.691362
AC003992.1	0	NA	NA	NA	NA	NA
AC004000.1	0	NA	NA	NA	NA	NA
AC004004.1	0	NA	NA	NA	NA	NA
AC004006.1	0	NA	NA	NA	NA	NA
AC004009.1	0	NA	NA	NA	NA	NA
AC004009.2	0	NA	NA	NA	NA	NA
AC004009.3	0	NA	NA	NA	NA	NA
AC004012.1	0.819398	-0.864786	3.10938	-0.278121	0.780919	NA
AC004014.1	0	NA	NA	NA	NA	NA
AC004014.2	0	NA	NA	NA	NA	NA
AC004022.1	0	NA	NA	NA	NA	NA
AC004022.2	0	NA	NA	NA	NA	NA
AC004023.1	0.232946	0.373771	3.12899	0.119454	0.904916	NA
AC004024.1	2.3831	-2.3675	3.05342	-0.775361	0.438126	NA
AC004034.1	52.9875	1.2761	0.684168	1.86519	0.0621546	0.310196
AC004039.1	0	NA	NA	NA	NA	NA
AC004052.1	0	NA	NA	NA	NA	NA
AC004053.1	15.5228	-3.96418	2.22978	-1.77784	0.07543	0.343607
AC004054.1	0.15093	-0.96098	3.14559	-0.305501	0.759985	NA
AC004057.1	254.141	0.29431	0.393029	0.748825	0.453963	0.779648
AC004062.1	0	NA	NA	NA	NA	NA
AC004063.1	0	NA	NA	NA	NA	NA
AC004066.1	0	NA	NA	NA	NA	NA
AC004066.2	0	NA	NA	NA	NA	NA
AC004067.1	7.73837	1.1365	1.69028	0.672374	0.501346	NA
AC004069.1	96.74	0.0846429	0.406643	0.20815	0.835112	0.951895
AC004069.2	0	NA	NA	NA	NA	NA
AC004074.1	0	NA	NA	NA	NA	NA
AC004076.1	0	NA	NA	NA	NA	NA
AC004076.2	8.34089	2.94679	1.6625	1.7725	0.0763111	NA
AC004080.1	0	NA	NA	NA	NA	NA
AC004080.2	0.15093	-0.96098	3.14559	-0.305501	0.759985	NA
AC004080.3	0	NA	NA	NA	NA	NA
AC004080.4	17.1908	3.27853	1.16673	2.81001	0.00495397	0.0629708
AC004080.5	0	NA	NA	NA	NA	NA
AC004080.6	0	NA	NA	NA	NA	NA
AC004112.1	2.79625	-2.37881	2.39023	-0.995224	0.319628	NA
AC004129.1	0	NA	NA	NA	NA	NA
AC004129.2	0	NA	NA	NA	NA	NA
AC004130.1	56.499	0.153342	0.698794	0.219438	0.826309	0.947968
AC004134.1	25.0166	1.66586	1.14517	1.45468	0.145759	0.481259
AC004147.1	0	NA	NA	NA	NA	NA
AC004147.2	8.15311	0.43353	3.10028	0.139836	0.88879	NA
AC004147.3	0	NA	NA	NA	NA	NA
AC004147.4	0	NA	NA	NA	NA	NA
AC004147.5	0	NA	NA	NA	NA	NA
AC004148.1	0.776664	0.799778	3.11119	0.257065	0.797129	NA
AC004148.2	44.6032	3.13686	1.41358	2.21909	0.0264809	0.188467
AC004149.1	0	NA	NA	NA	NA	NA
AC004156.1	3.56264	-0.901541	3.02713	-0.29782	0.76584	NA
AC004158.1	0.60097	0.835828	3.11958	0.26793	0.788753	NA
AC004160.1	1.3684	1.51329	3.09486	0.488969	0.624864	NA
AC004160.2	0	NA	NA	NA	NA	NA
AC004217.1	5.81254	1.477	3.01196	0.490378	0.623867	NA
AC004217.2	0.815311	0.416501	3.10831	0.133996	0.893406	NA
AC004221.1	0.388332	0.764077	3.12168	0.244764	0.806639	NA
AC004223.1	0.272771	-1.16344	3.13658	-0.370926	0.710692	NA
AC004223.2	0.197951	0.44923	3.13297	0.143388	0.885984	NA
AC004223.3	0	NA	NA	NA	NA	NA
AC004223.4	0.643137	-0.0453667	3.10236	-0.0146233	0.988333	NA
AC004224.1	1.33375	0.655685	3.03016	0.216387	0.828686	NA
AC004224.2	0	NA	NA	NA	NA	NA
AC004231.1	0.064722	0.329317	3.1536	0.104426	0.916831	NA
AC004231.3	0	NA	NA	NA	NA	NA
AC004232.1	0	NA	NA	NA	NA	NA
AC004232.2	0	NA	NA	NA	NA	NA
AC004232.3	2.40833	-3.23612	3.01672	-1.07273	0.283393	NA
AC004233.1	0.293556	0.118662	3.13089	0.0379005	0.969767	NA
AC004233.2	0.215652	-0.387862	3.13898	-0.123563	0.901661	NA
AC004233.3	46.6257	-0.4433	0.777705	-0.57001	0.568671	0.841834
AC004233.4	9.18748	3.40662	1.74114	1.95654	0.0504014	0.275613
AC004241.1	22.8388	-2.17493	0.910546	-2.3886	0.0169129	0.142684
AC004241.2	0	NA	NA	NA	NA	NA
AC004241.3	61.4337	1.03247	0.645682	1.59903	0.109814	0.417067
AC004241.4	0	NA	NA	NA	NA	NA
AC004241.5	3.8855	0.31787	3.05022	0.104212	0.917001	NA
AC004253.1	6.82539	0.29616	1.63504	0.181134	0.856263	NA
AC004253.2	0	NA	NA	NA	NA	NA
AC004257.1	0.820554	-0.794203	3.11188	-0.255217	0.798556	NA
AC004263.1	5.46116	1.21574	3.09856	0.392355	0.694796	NA
AC004264.1	0.751212	0.848881	3.11589	0.272436	0.785287	NA
AC004264.2	0.826334	0.853826	3.11451	0.274144	0.783974	NA
AC004381.1	0.747152	0.550532	3.08977	0.178179	0.858583	NA
AC004381.2	11.5207	2.79816	1.23866	2.25902	0.0238821	0.177669
AC004381.3	0.737846	-1.22295	3.08099	-0.396934	0.691416	NA
AC004383.1	0.525849	0.826955	3.12212	0.264869	0.79111	NA
AC004386.1	0.15093	-0.96098	3.14559	-0.305501	0.759985	NA
AC004386.2	0	NA	NA	NA	NA	NA
AC004408.1	0	NA	NA	NA	NA	NA
AC004408.2	0.539262	-0.0842201	3.09266	-0.0272322	0.978275	NA
AC004415.1	0	NA	NA	NA	NA	NA
AC004448.1	0	NA	NA	NA	NA	NA
AC004448.2	0.450727	0.81565	3.12541	0.260974	0.794113	NA
AC004448.3	0	NA	NA	NA	NA	NA
AC004449.1	0	NA	NA	NA	NA	NA
AC004453.1	635.644	0.232755	0.39237	0.593202	0.553046	0.833485
AC004453.2	0.234114	-0.812295	3.132	-0.259354	0.795362	NA
AC004461.1	4.8803	-0.23065	2.93174	-0.0786735	0.937292	NA
AC004461.2	0	NA	NA	NA	NA	NA
AC004466.1	0.204565	1.04254	3.13182	0.332886	0.73922	NA
AC004466.2	9.32805	0.26515	1.23714	0.214326	0.830293	0.950128
AC004466.3	0.258888	0.733271	3.13116	0.234185	0.814841	NA
AC004467.1	0	NA	NA	NA	NA	NA
AC004470.1	0	NA	NA	NA	NA	NA
AC004471.1	21.0159	1.22709	1.59092	0.771304	0.440527	0.772991
AC004471.2	0.684841	0.302591	3.08487	0.0980885	0.921862	NA
AC004477.1	15.8524	-0.111467	1.40546	-0.0793101	0.936786	0.981439
AC004477.2	0	NA	NA	NA	NA	NA
AC004477.3	3.2835	0.663315	3.05166	0.217362	0.827926	NA
AC004485.1	0	NA	NA	NA	NA	NA
AC004486.1	0	NA	NA	NA	NA	NA
AC004490.1	1.77907	1.55708	3.09218	0.503555	0.614574	NA
AC004491.1	22.7329	0.771679	0.837975	0.920886	0.35711	0.716361
AC004492.1	0	NA	NA	NA	NA	NA
AC004494.1	10.7234	2.18018	1.82731	1.19311	0.232826	0.592876
AC004494.2	0	NA	NA	NA	NA	NA
AC004520.1	25.243	1.09853	1.44127	0.7622	0.445941	0.775268
AC004522.1	0	NA	NA	NA	NA	NA
AC004522.2	0	NA	NA	NA	NA	NA
AC004528.1	1.34411	2.27599	3.10761	0.732392	0.46393	NA
AC004528.2	0	NA	NA	NA	NA	NA
AC004540.1	185.889	0.277431	0.362286	0.76578	0.443807	0.774307
AC004540.2	145.548	0.82452	0.846784	0.973707	0.330202	0.696484
AC004542.1	0	NA	NA	NA	NA	NA
AC004542.2	0	NA	NA	NA	NA	NA
AC004543.1	0	NA	NA	NA	NA	NA
AC004551.1	1.86667	-0.30126	3.06277	-0.0983621	0.921645	NA
AC004552.1	141.374	0.149979	0.449146	0.33392	0.73844	0.919031
AC004554.1	0	NA	NA	NA	NA	NA
AC004554.2	0.573267	-1.83242	3.13122	-0.585212	0.558406	NA
AC004556.1	0	NA	NA	NA	NA	NA
AC004584.1	0	NA	NA	NA	NA	NA
AC004584.2	0.7027	0.911308	3.07899	0.295976	0.767249	NA
AC004584.3	2.93094	0.333952	3.05154	0.109437	0.912856	NA
AC004585.1	1.1115	-2.19305	3.09596	-0.708359	0.478722	NA
AC004585.2	0	NA	NA	NA	NA	NA
AC004590.1	0	NA	NA	NA	NA	NA
AC004593.1	0.0681927	-0.698551	3.15201	-0.221621	0.824609	NA
AC004593.2	0.458211	1.28803	3.12315	0.412415	0.680035	NA
AC004593.3	1.9802	1.66545	2.29285	0.726369	0.467612	NA
AC004594.1	0.136385	-0.939874	3.14451	-0.298894	0.765021	NA
AC004596.1	8.81341	-0.647596	0.970886	-0.667015	0.504763	NA
AC004597.1	0.15093	-0.96098	3.14559	-0.305501	0.759985	NA
AC004623.1	3.24659	1.68906	3.04216	0.555216	0.578747	NA
AC004637.1	0	NA	NA	NA	NA	NA
AC004656.1	135.025	0.201836	0.673323	0.299762	0.764359	0.929849
AC004672.1	0	NA	NA	NA	NA	NA
AC004672.2	1.27706	0.872226	3.10947	0.280506	0.779089	NA
AC004674.1	0	NA	NA	NA	NA	NA
AC004674.2	0	NA	NA	NA	NA	NA
AC004678.1	1.12672	1.74675	3.10573	0.562428	0.573824	NA
AC004678.2	0.676091	0.842984	3.11755	0.2704	0.786853	NA
AC004687.1	177.498	1.13434	0.688935	1.64652	0.0996576	0.396736
AC004690.1	0	NA	NA	NA	NA	NA
AC004690.2	1.14878	-0.801612	3.10839	-0.257887	0.796494	NA
AC004691.1	0.976576	0.861657	3.11235	0.276851	0.781895	NA
AC004691.2	0	NA	NA	NA	NA	NA
AC004692.1	0	NA	NA	NA	NA	NA
AC004692.2	0	NA	NA	NA	NA	NA
AC004696.1	0.463453	1.34279	3.11549	0.431003	0.666466	NA
AC004696.2	0.246447	-0.944295	3.1424	-0.300501	0.763795	NA
AC004702.1	0	NA	NA	NA	NA	NA
AC004704.1	0	NA	NA	NA	NA	NA
AC004706.1	2.76153	-0.323701	3.10181	-0.104359	0.916885	NA
AC004706.2	0	NA	NA	NA	NA	NA
AC004706.3	0.517776	0.78122	3.11658	0.250666	0.802073	NA
AC004707.1	1.12633	0.632728	3.10874	0.203532	0.838719	NA
AC004754.1	3.68329	-1.29297	2.33279	-0.55426	0.579401	NA
AC004771.1	1.14878	-0.801612	3.10839	-0.257887	0.796494	NA
AC004771.2	0	NA	NA	NA	NA	NA
AC004771.3	3.18419	-0.169307	1.89914	-0.0891491	0.928963	NA
AC004771.4	0	NA	NA	NA	NA	NA
AC004771.5	12.4283	-0.0772351	1.09505	-0.0705312	0.943771	0.983592
AC004775.1	0	NA	NA	NA	NA	NA
AC004777.1	0	NA	NA	NA	NA	NA
AC004784.1	0	NA	NA	NA	NA	NA
AC004790.1	0	NA	NA	NA	NA	NA
AC004790.2	0	NA	NA	NA	NA	NA
AC004792.1	0	NA	NA	NA	NA	NA
AC004797.1	0	NA	NA	NA	NA	NA
AC004801.1	11.9547	-0.807878	0.820437	-0.984692	0.324775	0.692546
AC004801.2	2.01381	1.31438	3.08742	0.425722	0.670311	NA
AC004801.3	0	NA	NA	NA	NA	NA
AC004801.4	0.232946	0.373771	3.12899	0.119454	0.904916	NA
AC004801.5	0	NA	NA	NA	NA	NA
AC004801.6	8.44843	-0.689241	1.19727	-0.575676	0.564834	NA
AC004801.7	0	NA	NA	NA	NA	NA
AC004803.1	61.837	1.34142	0.594637	2.25586	0.0240796	0.17854
AC004805.1	0	NA	NA	NA	NA	NA
AC004805.2	0.232946	0.373771	3.12899	0.119454	0.904916	NA
AC004805.3	0.675796	0.615596	3.1146	0.197649	0.84332	NA
AC004808.1	0	NA	NA	NA	NA	NA
AC004808.2	2.4712	-0.156031	3.10275	-0.050288	0.959893	NA
AC004812.1	0	NA	NA	NA	NA	NA
AC004812.2	131.697	-0.277549	0.534757	-0.519019	0.603747	0.858986
AC004816.1	5.63099	0.541384	3.00423	0.180207	0.85699	NA
AC004816.2	0.752587	-0.0720412	3.07709	-0.0234121	0.981322	NA
AC004817.1	0.423013	-0.265101	3.10746	-0.0853112	0.932014	NA
AC004817.2	2.08215	-1.21602	3.03391	-0.400809	0.68856	NA
AC004817.3	8.20956	-3.28988	2.48718	-1.32274	0.185922	NA
AC004817.4	3.08755	1.86162	3.09384	0.601718	0.547362	NA
AC004824.1	0	NA	NA	NA	NA	NA
AC004825.1	0	NA	NA	NA	NA	NA
AC004825.2	82.8323	0.107857	0.874239	0.123373	0.901812	0.970027
AC004828.1	0.234114	-0.812295	3.132	-0.259354	0.795362	NA
AC004830.1	0	NA	NA	NA	NA	NA
AC004832.1	0.468227	-0.847963	3.1165	-0.272088	0.785554	NA
AC004832.2	0	NA	NA	NA	NA	NA
AC004832.3	0	NA	NA	NA	NA	NA
AC004832.4	3.1649	1.5985	1.87367	0.85314	0.393581	NA
AC004832.5	4.36112	3.47104	3.01924	1.14964	0.250292	NA
AC004832.6	2.5109	0.687589	3.01251	0.228244	0.819456	NA
AC004834.1	4.78616	1.49257	3.01022	0.495834	0.620012	NA
AC004835.1	0	NA	NA	NA	NA	NA
AC004835.2	0	NA	NA	NA	NA	NA
AC004836.1	0	NA	NA	NA	NA	NA
AC004837.1	0	NA	NA	NA	NA	NA
AC004837.2	43.4818	1.35543	0.930567	1.45656	0.145239	0.480359
AC004837.3	0	NA	NA	NA	NA	NA
AC004839.1	1.86386	-0.665518	3.05939	-0.217533	0.827793	NA
AC004840.1	0.376293	-0.0706327	3.10962	-0.0227142	0.981878	NA
AC004840.2	0	NA	NA	NA	NA	NA
AC004846.1	22.672	-3.80891	1.32087	-2.88364	0.00393105	0.0534887
AC004846.2	5.89832	-0.838419	1.7334	-0.483685	0.62861	NA
AC004847.1	49.3689	1.69027	0.965851	1.75004	0.0801119	0.353254
AC004852.1	0	NA	NA	NA	NA	NA
AC004852.2	0.150242	0.561815	3.14458	0.178662	0.858203	NA
AC004852.3	0	NA	NA	NA	NA	NA
AC004853.1	0	NA	NA	NA	NA	NA
AC004854.1	0.452789	-1.12699	3.12066	-0.361139	0.717996	NA
AC004854.2	87.8122	0.233421	0.520563	0.448402	0.653863	0.880972
AC004858.1	1.89631	0.425408	3.04336	0.139782	0.888832	NA
AC004862.1	0.776664	0.799778	3.11119	0.257065	0.797129	NA
AC004865.1	4.89823	0.365602	2.23153	0.163835	0.869861	NA
AC004865.2	330.213	-0.417319	0.648178	-0.643834	0.519683	0.815883
AC004866.1	0	NA	NA	NA	NA	NA
AC004866.2	0	NA	NA	NA	NA	NA
AC004869.1	0	NA	NA	NA	NA	NA
AC004869.2	0	NA	NA	NA	NA	NA
AC004870.1	0.234114	-0.812295	3.132	-0.259354	0.795362	NA
AC004870.2	0	NA	NA	NA	NA	NA
AC004870.3	0	NA	NA	NA	NA	NA
AC004870.4	0	NA	NA	NA	NA	NA
AC004872.1	0	NA	NA	NA	NA	NA
AC004875.1	0	NA	NA	NA	NA	NA
AC004877.1	2.04578	-1.27285	3.10534	-0.409891	0.681886	NA
AC004877.2	6.13652	0.481903	2.05354	0.234669	0.814465	NA
AC004882.1	0	NA	NA	NA	NA	NA
AC004882.2	0	NA	NA	NA	NA	NA
AC004884.1	0.150242	0.561815	3.14458	0.178662	0.858203	NA
AC004884.2	18.731	1.33356	0.739638	1.80299	0.0713898	0.333734
AC004888.1	0	NA	NA	NA	NA	NA
AC004889.1	22.6202	-0.583803	1.15872	-0.503835	0.614377	0.864865
AC004890.1	48.5827	0.686174	0.663334	1.03443	0.300934	0.670168
AC004890.2	24.3768	0.664096	1.32218	0.502273	0.615476	0.865217
AC004890.3	3.66887	-1.27735	3.02124	-0.422788	0.67245	NA
AC004893.1	1.06123	1.31411	3.09329	0.424826	0.670963	NA
AC004893.2	0	NA	NA	NA	NA	NA
AC004895.1	1.77312	-0.492842	3.01183	-0.163635	0.870018	NA
AC004898.1	11.3933	0.354934	0.957796	0.370574	0.710955	0.90781
AC004899.1	2.92814	-3.29111	3.05086	-1.07875	0.2807	NA
AC004899.2	0	NA	NA	NA	NA	NA
AC004906.1	0	NA	NA	NA	NA	NA
AC004908.1	33.5288	3.93677	1.0983	3.58443	0.000337813	0.00868233
AC004908.2	65.1756	1.30594	0.831173	1.5712	0.116136	0.429663
AC004908.3	8.25612	4.47294	2.1727	2.0587	0.0395228	NA
AC004910.1	0	NA	NA	NA	NA	NA
AC004911.1	0	NA	NA	NA	NA	NA
AC004917.1	7.25752	-0.886179	3.10053	-0.285815	0.77502	NA
AC004918.1	20.9674	-2.09147	1.18257	-1.76858	0.0769639	0.347246
AC004918.3	31.722	-4.188	1.40154	-2.98814	0.00280681	0.0425254
AC004920.1	0	NA	NA	NA	NA	NA
AC004921.1	39.2959	-6.2166	1.68188	-3.69623	0.000218821	0.00617449
AC004922.1	19.1878	0.771311	1.04731	0.73647	0.461445	0.784235
AC004923.1	0.984665	-0.798502	3.10985	-0.256765	0.79736	NA
AC004923.2	0	NA	NA	NA	NA	NA
AC004923.3	0	NA	NA	NA	NA	NA
AC004923.4	3.25166	2.26431	2.02511	1.11812	0.263517	NA
AC004925.1	0	NA	NA	NA	NA	NA
AC004930.1	0	NA	NA	NA	NA	NA
AC004936.1	0	NA	NA	NA	NA	NA
AC004938.1	0	NA	NA	NA	NA	NA
AC004941.1	0	NA	NA	NA	NA	NA
AC004941.2	1.94729	1.52292	1.8112	0.840835	0.40044	NA
AC004943.1	7.85286	-0.350877	1.74105	-0.201532	0.840282	NA
AC004943.2	67.3819	0.698704	1.02499	0.681667	0.49545	0.80298
AC004943.3	1.98998	1.79932	3.08883	0.582524	0.560214	NA
AC004944.1	0	NA	NA	NA	NA	NA
AC004945.1	0.328222	-0.758103	3.12922	-0.242266	0.808574	NA
AC004946.1	0	NA	NA	NA	NA	NA
AC004947.1	30.2877	2.00956	2.07741	0.967343	0.333373	0.699215
AC004947.2	0.112633	0.360435	3.15767	0.114146	0.909122	NA
AC004948.1	0	NA	NA	NA	NA	NA
AC004949.1	0	NA	NA	NA	NA	NA
AC004951.1	16.3433	0.519969	0.814911	0.638068	0.523429	0.817378
AC004951.2	9.53422	0.0926013	1.18502	0.0781435	0.937714	0.981669
AC004951.3	5.68753	3.48216	1.84366	1.88873	0.0589284	NA
AC004951.4	8.04534	1.71377	2.12468	0.8066	0.419897	NA
AC004965.1	0	NA	NA	NA	NA	NA
AC004967.1	47.3843	1.26428	0.740417	1.70753	0.0877243	0.370362
AC004969.1	0	NA	NA	NA	NA	NA
AC004972.1	0	NA	NA	NA	NA	NA
AC004973.1	0	NA	NA	NA	NA	NA
AC004975.1	0.931784	0.418806	3.10721	0.134785	0.892782	NA
AC004975.2	2.05707	-2.40017	3.0776	-0.779883	0.435459	NA
AC004980.1	172.057	0.32041	0.373936	0.856858	0.391523	0.741345
AC004980.2	8.35082	0.0837912	1.48835	0.0562979	0.955104	NA
AC004980.3	2.70651	1.55751	1.70412	0.913968	0.360734	NA
AC004980.4	0.0989756	0.386754	3.16068	0.122364	0.902611	NA
AC004982.1	3.33853	0.0210208	3.03352	0.00692952	0.994471	NA
AC004982.2	40.2507	0.265022	0.910712	0.291005	0.771048	0.931466
AC004986.1	0.896789	1.36612	3.09861	0.44088	0.6593	NA
AC004987.1	1.16848	2.53103	3.05968	0.82722	0.408113	NA
AC004987.2	33.648	0.194481	0.586548	0.331568	0.740215	0.920146
AC004987.3	0	NA	NA	NA	NA	NA
AC004987.4	0	NA	NA	NA	NA	NA
AC004988.1	2.34114	-0.880293	3.10295	-0.283696	0.776643	NA
AC004990.1	3.28139	-2.27452	3.01816	-0.753612	0.451083	NA
AC004994.1	0	NA	NA	NA	NA	NA
AC004997.1	0	NA	NA	NA	NA	NA
AC005000.1	136.53	0.0351167	0.367814	0.0954741	0.923938	0.977332
AC005000.2	0	NA	NA	NA	NA	NA
AC005002.1	0.534805	-0.641936	3.08826	-0.207863	0.835336	NA
AC005002.2	0	NA	NA	NA	NA	NA
AC005005.1	0	NA	NA	NA	NA	NA
AC005005.2	0	NA	NA	NA	NA	NA
AC005005.3	10.6029	0.986982	1.2864	0.767242	0.442937	0.77408
AC005005.4	0	NA	NA	NA	NA	NA
AC005006.1	0.855788	-1.11515	3.0817	-0.361861	0.717456	NA
AC005008.1	0	NA	NA	NA	NA	NA
AC005008.2	0.883405	0.696097	3.07683	0.226238	0.821016	NA
AC005009.1	0	NA	NA	NA	NA	NA
AC005009.2	0.985788	-1.03205	3.1117	-0.331666	0.740142	NA
AC005011.1	0.818312	-1.24236	3.11356	-0.399017	0.689881	NA
AC005013.1	0	NA	NA	NA	NA	NA
AC005014.1	4.43939	0.396281	1.31736	0.300814	0.763556	NA
AC005014.2	18.1085	-1.03094	0.967185	-1.06592	0.286459	0.654478
AC005014.3	1.80232	1.96428	3.09112	0.635459	0.525129	NA
AC005019.1	0	NA	NA	NA	NA	NA
AC005019.2	0	NA	NA	NA	NA	NA
AC005020.1	44.9079	-0.785414	0.632577	-1.24161	0.21438	0.573131
AC005020.2	0	NA	NA	NA	NA	NA
AC005021.1	0.129444	0.576765	3.14535	0.183371	0.854507	NA
AC005033.1	0	NA	NA	NA	NA	NA
AC005034.1	0	NA	NA	NA	NA	NA
AC005034.2	0.150242	0.561815	3.14458	0.178662	0.858203	NA
AC005034.3	58.4134	0.834353	0.879517	0.948649	0.342799	0.706709
AC005034.4	1.70517	0.226869	3.07277	0.073832	0.941144	NA
AC005034.5	3.5623	2.78787	2.84565	0.979694	0.327237	NA
AC005037.1	0	NA	NA	NA	NA	NA
AC005040.1	0	NA	NA	NA	NA	NA
AC005041.1	0.234114	-0.812295	3.132	-0.259354	0.795362	NA
AC005041.2	0	NA	NA	NA	NA	NA
AC005041.3	1.26177	0.018755	3.05085	0.00614745	0.995095	NA
AC005042.1	1.12234	-0.193625	3.06674	-0.063137	0.949657	NA
AC005042.2	0	NA	NA	NA	NA	NA
AC005042.3	0.39669	-0.0136639	3.1173	-0.00438326	0.996503	NA
AC005046.1	9.0295	0.673972	1.91348	0.352224	0.72467	0.914596
AC005050.1	0	NA	NA	NA	NA	NA
AC005052.1	0.188098	-0.164371	3.15673	-0.0520698	0.958473	NA
AC005062.1	10.9669	2.46052	1.49111	1.65013	0.0989164	0.395809
AC005064.1	0	NA	NA	NA	NA	NA
AC005066.1	0	NA	NA	NA	NA	NA
AC005070.1	0	NA	NA	NA	NA	NA
AC005070.2	0	NA	NA	NA	NA	NA
AC005070.3	17.3618	-0.629723	1.20095	-0.524354	0.600032	0.857916
AC005072.1	65.4437	0.987584	0.575589	1.71578	0.0862024	0.367327
AC005076.1	35.2764	0.14623	0.494106	0.295947	0.76727	0.9312
AC005077.1	0	NA	NA	NA	NA	NA
AC005077.2	4.65927	-0.529021	1.36827	-0.386634	0.699027	NA
AC005077.3	0.246447	-0.944295	3.1424	-0.300501	0.763795	NA
AC005077.4	0	NA	NA	NA	NA	NA
AC005082.1	70.5009	-4.06799	1.44439	-2.8164	0.00485654	0.0620097
AC005083.1	41.6541	-1.87336	0.916006	-2.04514	0.0408411	0.243175
AC005084.1	0	NA	NA	NA	NA	NA
AC005086.1	12.7167	-0.833809	1.80136	-0.462878	0.643452	0.877948
AC005086.2	1.41118	-0.416058	3.08045	-0.135064	0.892561	NA
AC005086.3	0.957873	2.14386	3.08471	0.694993	0.48706	NA
AC005086.4	0.376637	-0.153636	3.11116	-0.0493822	0.960615	NA
AC005088.1	0	NA	NA	NA	NA	NA
AC005089.1	0.328222	-0.758103	3.12922	-0.242266	0.808574	NA
AC005090.1	0	NA	NA	NA	NA	NA
AC005091.1	0.607921	-1.29016	3.10328	-0.41574	0.6776	NA
AC005094.1	0	NA	NA	NA	NA	NA
AC005096.1	1.25626	1.72479	3.09954	0.556467	0.577892	NA
AC005099.1	4.98656	1.08468	1.1881	0.912954	0.361267	NA
AC005102.1	0.528253	-1.13614	3.11789	-0.364395	0.715563	NA
AC005104.1	4.75409	1.27412	3.03487	0.419828	0.674611	NA
AC005104.2	0.375606	0.800744	3.12983	0.255843	0.798072	NA
AC005105.1	0	NA	NA	NA	NA	NA
AC005144.1	0	NA	NA	NA	NA	NA
AC005150.1	0	NA	NA	NA	NA	NA
AC005154.1	297.247	1.07632	0.5372	2.00357	0.0451158	0.257381
AC005154.2	0	NA	NA	NA	NA	NA
AC005154.3	0	NA	NA	NA	NA	NA
AC005154.4	0	NA	NA	NA	NA	NA
AC005154.5	0.678496	-0.201862	3.09589	-0.0652034	0.948012	NA
AC005154.6	0	NA	NA	NA	NA	NA
AC005156.1	3.6137	0.260845	1.5838	0.164696	0.869183	NA
AC005160.1	0	NA	NA	NA	NA	NA
AC005162.1	0.267299	0.16384	3.13333	0.0522893	0.958298	NA
AC005162.2	0	NA	NA	NA	NA	NA
AC005162.3	0	NA	NA	NA	NA	NA
AC005165.1	0	NA	NA	NA	NA	NA
AC005165.2	0	NA	NA	NA	NA	NA
AC005176.1	0	NA	NA	NA	NA	NA
AC005176.2	0	NA	NA	NA	NA	NA
AC005178.1	0	NA	NA	NA	NA	NA
AC005180.1	0	NA	NA	NA	NA	NA
AC005180.2	0.702341	-0.860967	3.11099	-0.27675	0.781972	NA
AC005181.1	0	NA	NA	NA	NA	NA
AC005183.1	21.1957	2.18049	1.22751	1.77636	0.0756739	0.344119
AC005185.1	0	NA	NA	NA	NA	NA
AC005186.1	1.16473	0.422065	3.10567	0.135902	0.891899	NA
AC005189.1	0.792319	2.40602	3.09947	0.776266	0.437592	NA
AC005191.1	0	NA	NA	NA	NA	NA
AC005197.1	0	NA	NA	NA	NA	NA
AC005208.1	0.328222	-0.758103	3.12922	-0.242266	0.808574	NA
AC005209.1	0	NA	NA	NA	NA	NA
AC005220.1	0.0754648	-0.711835	3.15405	-0.225689	0.821443	NA
AC005224.1	8.70756	5.66607	2.34952	2.41159	0.0158833	NA
AC005224.2	4.68705	-2.49319	3.06408	-0.813682	0.415827	NA
AC005224.3	1.13137	1.70629	3.09989	0.550435	0.582021	NA
AC005224.4	53.4112	1.29095	0.949862	1.35909	0.174118	0.523381
AC005225.1	4.75222	1.88392	2.85585	0.659672	0.509464	NA
AC005225.2	1.97111	-1.48471	3.06322	-0.484689	0.627897	NA
AC005225.3	0	NA	NA	NA	NA	NA
AC005225.4	2.69524	1.62171	2.497	0.64946	0.516041	NA
AC005229.1	0	NA	NA	NA	NA	NA
AC005229.2	0	NA	NA	NA	NA	NA
AC005229.3	0	NA	NA	NA	NA	NA
AC005229.4	88.4235	-0.46613	0.994784	-0.468574	0.639374	0.876066
AC005230.1	0	NA	NA	NA	NA	NA
AC005232.1	0.300485	0.780115	3.1361	0.248753	0.803552	NA
AC005234.1	0	NA	NA	NA	NA	NA
AC005237.1	3.56312	0.525487	3.10144	0.169433	0.865456	NA
AC005237.2	0.064722	0.329317	3.1536	0.104426	0.916831	NA
AC005244.1	6.12002	0.323192	2.05529	0.157249	0.875049	NA
AC005244.2	0	NA	NA	NA	NA	NA
AC005252.1	0	NA	NA	NA	NA	NA
AC005252.2	0.150242	0.561815	3.14458	0.178662	0.858203	NA
AC005252.3	0	NA	NA	NA	NA	NA
AC005253.1	11.5188	0.618104	1.2478	0.495353	0.620351	0.866861
AC005253.2	0	NA	NA	NA	NA	NA
AC005255.1	0	NA	NA	NA	NA	NA
AC005256.1	0	NA	NA	NA	NA	NA
AC005258.1	0	NA	NA	NA	NA	NA
AC005261.1	240.752	0.352637	0.438024	0.805064	0.420783	0.76158
AC005261.2	1.47836	-0.465605	3.02104	-0.154121	0.877514	NA
AC005261.3	114.338	-0.173061	1.02979	-0.168055	0.86654	0.960051
AC005261.4	3.78312	-0.947231	1.15462	-0.820385	0.411997	NA
AC005261.5	7.57801	-5.27712	1.8232	-2.89442	0.00379862	NA
AC005262.1	0	NA	NA	NA	NA	NA
AC005262.2	0	NA	NA	NA	NA	NA
AC005264.1	49.4267	4.05665	1.02442	3.95994	7.5e-05	0.00270177
AC005274.1	0	NA	NA	NA	NA	NA
AC005277.1	0	NA	NA	NA	NA	NA
AC005277.2	0	NA	NA	NA	NA	NA
AC005280.1	0	NA	NA	NA	NA	NA
AC005280.2	2.11505	-2.49459	2.42128	-1.03028	0.302878	NA
AC005280.3	0	NA	NA	NA	NA	NA
AC005281.1	0	NA	NA	NA	NA	NA
AC005288.1	61.1535	-0.445909	1.16419	-0.383021	0.701704	0.904373
AC005291.1	0	NA	NA	NA	NA	NA
AC005291.2	0	NA	NA	NA	NA	NA
AC005294.1	0	NA	NA	NA	NA	NA
AC005296.1	0	NA	NA	NA	NA	NA
AC005297.1	0	NA	NA	NA	NA	NA
AC005297.2	0	NA	NA	NA	NA	NA
AC005297.3	0	NA	NA	NA	NA	NA
AC005300.1	1.80522	-0.808516	3.10516	-0.260378	0.794572	NA
AC005301.1	0	NA	NA	NA	NA	NA
AC005303.1	0	NA	NA	NA	NA	NA
AC005304.1	0	NA	NA	NA	NA	NA
AC005304.2	0	NA	NA	NA	NA	NA
AC005304.3	0	NA	NA	NA	NA	NA
AC005306.1	0.720929	0.600562	3.10003	0.193728	0.846389	NA
AC005307.1	1.64545	0.0160529	3.05864	0.00524837	0.995812	NA
AC005323.1	0	NA	NA	NA	NA	NA
AC005323.2	0	NA	NA	NA	NA	NA
AC005324.1	0	NA	NA	NA	NA	NA
AC005324.2	0	NA	NA	NA	NA	NA
AC005324.3	0	NA	NA	NA	NA	NA
AC005324.4	0	NA	NA	NA	NA	NA
AC005324.5	0	NA	NA	NA	NA	NA
AC005324.6	0	NA	NA	NA	NA	NA
AC005326.1	0	NA	NA	NA	NA	NA
AC005329.1	16.2469	3.90089	1.89235	2.0614	0.0392652	0.237201
AC005329.2	0	NA	NA	NA	NA	NA
AC005329.3	0.150242	0.561815	3.14458	0.178662	0.858203	NA
AC005330.1	0.634421	-0.52537	3.08814	-0.170125	0.864912	NA
AC005332.1	7.49846	0.658368	1.9183	0.343203	0.731446	NA
AC005332.2	0	NA	NA	NA	NA	NA
AC005332.3	6.72957	-2.75463	2.94179	-0.936379	0.349078	NA
AC005332.4	17.7813	2.27308	1.09068	2.0841	0.0371514	0.229662
AC005332.5	132.837	-0.183828	0.683447	-0.268972	0.787951	0.9357
AC005332.6	16.2833	2.56876	1.30522	1.96806	0.0490608	0.271479
AC005332.7	161.901	-0.249314	0.365132	-0.682806	0.49473	0.802875
AC005332.8	1.73363	-0.122871	3.06228	-0.0401239	0.967994	NA
AC005336.1	2.53491	-0.437352	2.50322	-0.174716	0.861303	NA
AC005336.2	23.3644	1.05565	1.3556	0.778738	0.436134	0.770103
AC005336.3	5.30963	0.329978	3.04924	0.108216	0.913824	NA
AC005339.1	0	NA	NA	NA	NA	NA
AC005341.1	0	NA	NA	NA	NA	NA
AC005342.1	3.69613	2.50896	3.0635	0.818984	0.412796	NA
AC005342.2	4.74203	3.78165	2.3321	1.62157	0.104896	NA
AC005344.1	1.28668	0.516434	3.10504	0.166321	0.867904	NA
AC005345.1	0	NA	NA	NA	NA	NA
AC005351.1	0	NA	NA	NA	NA	NA
AC005355.1	1.96849	-3.03167	3.06999	-0.987518	0.323389	NA
AC005355.2	15.3811	-2.73552	2.40531	-1.13729	0.255419	0.620397
AC005357.1	0	NA	NA	NA	NA	NA
AC005357.2	2.57324	-0.0668398	3.10261	-0.0215431	0.982812	NA
AC005358.1	0	NA	NA	NA	NA	NA
AC005358.2	0.465892	0.403029	3.11475	0.129394	0.897046	NA
AC005363.1	0	NA	NA	NA	NA	NA
AC005363.2	2.17328	0.701329	2.92518	0.239756	0.81052	NA
AC005377.1	0	NA	NA	NA	NA	NA
AC005379.1	0	NA	NA	NA	NA	NA
AC005381.1	0.770444	0.136485	3.10597	0.0439429	0.96495	NA
AC005383.1	0.656443	-0.787872	3.11488	-0.252938	0.800316	NA
AC005387.1	2.47205	4.03122	2.80945	1.43488	0.151321	NA
AC005387.2	1.29528	3.14526	3.07338	1.02339	0.306124	NA
AC005391.1	1.10219	1.48334	3.06502	0.483956	0.628417	NA
AC005392.1	0	NA	NA	NA	NA	NA
AC005392.2	89.785	-2.16719	1.05387	-2.0564	0.0397436	0.23821
AC005392.3	0.328222	-0.758103	3.12922	-0.242266	0.808574	NA
AC005393.1	0.225265	0.544415	3.14033	0.173362	0.862367	NA
AC005394.1	0	NA	NA	NA	NA	NA
AC005394.2	2.25891	-1.72204	3.10403	-0.554776	0.579048	NA
AC005410.1	138.859	0.64566	0.644761	1.0014	0.316636	0.685401
AC005410.2	3.18458	-0.308941	2.81267	-0.109839	0.912537	NA
AC005412.1	0	NA	NA	NA	NA	NA
AC005476.1	3.43171	-3.23012	2.05943	-1.56846	0.116775	NA
AC005476.2	6.60548	-0.506746	2.49537	-0.203074	0.839077	NA
AC005479.1	0.525849	0.826955	3.12212	0.264869	0.79111	NA
AC005479.2	0.534599	0.266764	3.09349	0.0862337	0.931281	NA
AC005480.1	14.3787	2.91407	1.43539	2.03016	0.0423407	0.247727
AC005480.2	0.226394	-1.07158	3.1382	-0.341462	0.732756	NA
AC005481.1	0.450727	0.81565	3.12541	0.260974	0.794113	NA
AC005482.1	0	NA	NA	NA	NA	NA
AC005486.1	0	NA	NA	NA	NA	NA
AC005487.1	0	NA	NA	NA	NA	NA
AC005495.1	0	NA	NA	NA	NA	NA
AC005498.1	0	NA	NA	NA	NA	NA
AC005498.2	5.66583	-0.0785122	2.31869	-0.0338606	0.972988	NA
AC005498.3	16.8003	-1.38757	1.55615	-0.891667	0.372572	0.725594
AC005514.1	0.337898	0.577414	3.12812	0.184588	0.853552	NA
AC005515.1	8.77793	-3.77831	3.04759	-1.23977	0.215061	NA
AC005515.2	0	NA	NA	NA	NA	NA
AC005518.1	0	NA	NA	NA	NA	NA
AC005518.2	0	NA	NA	NA	NA	NA
AC005519.1	11.6326	4.4185	1.79828	2.45707	0.0140076	0.125955
AC005520.1	3.53973	2.2507	3.05772	0.736071	0.461687	NA
AC005520.2	122.205	-0.911185	0.627101	-1.45301	0.14622	0.482134
AC005520.3	4.50197	1.01629	1.47792	0.687645	0.491676	NA
AC005520.4	0.301859	-1.09759	3.1298	-0.350692	0.72582	NA
AC005520.5	0	NA	NA	NA	NA	NA
AC005521.1	1.61119	2.20146	2.75071	0.800324	0.423523	NA
AC005522.1	2.29307	-1.59243	3.0094	-0.529151	0.596701	NA
AC005523.1	4.45396	-4.35289	2.3483	-1.85364	0.063791	NA
AC005523.2	0	NA	NA	NA	NA	NA
AC005524.1	0	NA	NA	NA	NA	NA
AC005529.1	0.429942	-0.195559	3.10188	-0.0630452	0.949731	NA
AC005531.1	2.33535	4.31132	2.75669	1.56395	0.11783	NA
AC005532.1	1.05572	1.45669	3.0587	0.476243	0.633901	NA
AC005532.2	0	NA	NA	NA	NA	NA
AC005534.1	0.609583	0.527455	3.0766	0.171441	0.863877	NA
AC005534.2	7.90679	-0.314311	0.976844	-0.321762	0.747633	NA
AC005537.1	0.656443	-0.787872	3.11488	-0.252938	0.800316	NA
AC005538.1	0	NA	NA	NA	NA	NA
AC005538.2	0	NA	NA	NA	NA	NA
AC005539.1	0	NA	NA	NA	NA	NA
AC005540.1	16.294	0.316441	1.22016	0.259344	0.79537	0.937152
AC005544.1	0	NA	NA	NA	NA	NA
AC005544.2	0	NA	NA	NA	NA	NA
AC005546.1	3.06958	2.58637	2.58568	1.00027	0.317181	NA
AC005549.1	0	NA	NA	NA	NA	NA
AC005550.1	0	NA	NA	NA	NA	NA
AC005550.2	0	NA	NA	NA	NA	NA
AC005551.1	4.70244	2.0852	2.18438	0.954598	0.339781	NA
AC005552.1	0	NA	NA	NA	NA	NA
AC005559.1	0	NA	NA	NA	NA	NA
AC005562.1	14.7503	0.673537	0.830215	0.81128	0.417205	0.760024
AC005562.2	0	NA	NA	NA	NA	NA
AC005578.1	7.38391	0.936998	1.84887	0.506795	0.612298	NA
AC005580.1	0.194166	0.706181	3.13984	0.22491	0.822049	NA
AC005586.1	32.7917	1.04446	0.837255	1.24748	0.21222	0.570746
AC005586.2	1.42799	0.0300588	3.08277	0.00975058	0.99222	NA
AC005587.1	0	NA	NA	NA	NA	NA
AC005588.1	0	NA	NA	NA	NA	NA
AC005592.1	0	NA	NA	NA	NA	NA
AC005593.1	27.5829	-0.230695	0.817953	-0.28204	0.777913	0.933154
AC005597.1	0	NA	NA	NA	NA	NA
AC005606.1	0	NA	NA	NA	NA	NA
AC005606.2	0	NA	NA	NA	NA	NA
AC005609.1	0	NA	NA	NA	NA	NA
AC005609.2	0	NA	NA	NA	NA	NA
AC005609.3	0	NA	NA	NA	NA	NA
AC005609.4	0	NA	NA	NA	NA	NA
AC005609.5	0	NA	NA	NA	NA	NA
AC005614.1	0.819398	-0.864786	3.10938	-0.278121	0.780919	NA
AC005614.2	0	NA	NA	NA	NA	NA
AC005616.1	0	NA	NA	NA	NA	NA
AC005618.1	2.2998	-1.98429	3.09245	-0.641658	0.521095	NA
AC005618.2	0	NA	NA	NA	NA	NA
AC005618.3	0	NA	NA	NA	NA	NA
AC005622.1	2.80936	-0.881729	3.10236	-0.284213	0.776247	NA
AC005625.1	0	NA	NA	NA	NA	NA
AC005632.1	0.225265	0.544415	3.14033	0.173362	0.862367	NA
AC005632.2	32.7403	-1.09796	1.00884	-1.08834	0.276444	0.643665
AC005632.3	0.225265	0.544415	3.14033	0.173362	0.862367	NA
AC005632.4	0.234114	-0.812295	3.132	-0.259354	0.795362	NA
AC005670.1	0.525996	-0.071261	3.11408	-0.0228835	0.981743	NA
AC005670.2	0	NA	NA	NA	NA	NA
AC005674.1	1.24384	-2.7545	3.09559	-0.889814	0.373566	NA
AC005674.2	16.4497	1.9879	1.6533	1.20238	0.229217	0.589428
AC005682.1	7.29859	4.82443	2.86432	1.68432	0.0921199	NA
AC005691.1	0	NA	NA	NA	NA	NA
AC005692.1	0	NA	NA	NA	NA	NA
AC005692.2	0	NA	NA	NA	NA	NA
AC005695.1	0.465892	0.403029	3.11475	0.129394	0.897046	NA
AC005695.2	1.58361	0.519063	3.10399	0.167224	0.867194	NA
AC005695.3	3.41741	1.28834	2.13572	0.603234	0.546353	NA
AC005696.1	14.6998	0.931153	1.19775	0.777419	0.436912	0.770795
AC005696.2	0	NA	NA	NA	NA	NA
AC005696.3	0.369671	-0.979399	3.1297	-0.312936	0.754329	NA
AC005696.4	15.6459	1.14364	1.79657	0.636569	0.524406	0.818169
AC005697.1	0	NA	NA	NA	NA	NA
AC005697.2	0.150242	0.561815	3.14458	0.178662	0.858203	NA
AC005699.1	2.2329	0.30139	3.10252	0.0971437	0.922612	NA
AC005702.1	0	NA	NA	NA	NA	NA
AC005702.2	2.38613	1.31774	3.06632	0.429747	0.66738	NA
AC005702.3	0.232946	0.373771	3.12899	0.119454	0.904916	NA
AC005702.4	0	NA	NA	NA	NA	NA
AC005703.1	0	NA	NA	NA	NA	NA
AC005703.2	0	NA	NA	NA	NA	NA
AC005703.3	0	NA	NA	NA	NA	NA
AC005703.4	0.452789	-1.12699	3.12066	-0.361139	0.717996	NA
AC005703.5	0	NA	NA	NA	NA	NA
AC005703.6	1.477	-0.805811	3.10642	-0.259402	0.795325	NA
AC005722.1	0	NA	NA	NA	NA	NA
AC005722.2	0	NA	NA	NA	NA	NA
AC005722.3	0	NA	NA	NA	NA	NA
AC005725.1	0	NA	NA	NA	NA	NA
AC005726.1	40.8179	1.64084	0.854361	1.92055	0.054789	0.289256
AC005726.2	0.197951	0.44923	3.13297	0.143388	0.885984	NA
AC005726.3	9.55746	3.64534	1.31418	2.77385	0.00553979	0.0679427
AC005726.4	0	NA	NA	NA	NA	NA
AC005726.5	0	NA	NA	NA	NA	NA
AC005730.1	0.525849	0.826955	3.12212	0.264869	0.79111	NA
AC005730.2	2.36647	3.24297	3.06059	1.05959	0.289332	NA
AC005730.3	2.65351	0.202533	3.01056	0.0672743	0.946363	NA
AC005736.1	1.86637	-0.000116663	3.0789	-3.79e-05	0.99997	NA
AC005736.2	0.754648	-1.15361	3.11271	-0.370613	0.710925	NA
AC005736.3	0	NA	NA	NA	NA	NA
AC005740.1	15.61	-0.603904	0.987819	-0.61135	0.540968	0.827227
AC005740.2	2.25897	-0.56382	2.958	-0.190609	0.848832	NA
AC005740.3	0.252668	0.0173501	3.1411	0.00552357	0.995593	NA
AC005740.4	0.927594	-0.0572963	3.08507	-0.0185721	0.985182	NA
AC005741.1	0	NA	NA	NA	NA	NA
AC005746.1	0	NA	NA	NA	NA	NA
AC005746.2	0	NA	NA	NA	NA	NA
AC005746.3	0	NA	NA	NA	NA	NA
AC005753.1	0	NA	NA	NA	NA	NA
AC005757.1	2.65698	-0.548598	3.05299	-0.179692	0.857395	NA
AC005758.1	0	NA	NA	NA	NA	NA
AC005759.1	2.17891	-0.823604	1.99879	-0.412051	0.680302	NA
AC005771.1	0	NA	NA	NA	NA	NA
AC005772.1	0	NA	NA	NA	NA	NA
AC005774.1	0	NA	NA	NA	NA	NA
AC005775.1	4.49429	-3.04316	2.44877	-1.24273	0.213966	NA
AC005776.1	0.934685	1.77215	3.10329	0.571055	0.567962	NA
AC005776.2	8.82316	2.70013	1.6343	1.65217	0.0985004	NA
AC005777.1	0	NA	NA	NA	NA	NA
AC005779.1	0.267299	0.16384	3.13333	0.0522893	0.958298	NA
AC005779.2	0	NA	NA	NA	NA	NA
AC005785.1	9.9212	1.53835	1.23389	1.24675	0.212489	0.570831
AC005785.2	12.3458	2.31962	1.55979	1.48713	0.136979	0.466448
AC005786.1	1.81106	1.17782	2.53813	0.464051	0.642611	NA
AC005786.2	0.862565	-1.02705	3.11336	-0.329885	0.741487	NA
AC005786.3	0	NA	NA	NA	NA	NA
AC005786.4	0	NA	NA	NA	NA	NA
AC005789.1	0	NA	NA	NA	NA	NA
AC005790.1	0	NA	NA	NA	NA	NA
AC005796.1	1.18644	-0.461949	3.06675	-0.150631	0.880266	NA
AC005798.1	0.76356	1.02444	3.10161	0.330293	0.741178	NA
AC005808.1	0	NA	NA	NA	NA	NA
AC005821.1	0	NA	NA	NA	NA	NA
AC005822.1	20.5831	-0.375985	0.786388	-0.478116	0.632567	0.87181
AC005823.1	0	NA	NA	NA	NA	NA
AC005823.2	0	NA	NA	NA	NA	NA
AC005828.1	1.75123	-0.692576	3.06009	-0.226325	0.820948	NA
AC005828.2	1.19571	1.45341	3.08236	0.471526	0.637265	NA
AC005828.3	0	NA	NA	NA	NA	NA
AC005828.4	0.194166	0.706181	3.13984	0.22491	0.822049	NA
AC005828.5	0.150242	0.561815	3.14458	0.178662	0.858203	NA
AC005828.6	0.15093	-0.96098	3.14559	-0.305501	0.759985	NA
AC005828.7	0.0751212	0.319974	3.15214	0.10151	0.919146	NA
AC005829.1	20.4043	-1.26087	0.943734	-1.33605	0.181534	0.532948
AC005829.2	88.0392	0.499927	0.655567	0.762588	0.445709	0.775268
AC005831.1	18.2086	-1.01816	1.48093	-0.687515	0.491758	0.80093
AC005832.1	0	NA	NA	NA	NA	NA
AC005832.2	7.37181	-1.72691	3.08495	-0.559785	0.575626	NA
AC005832.3	4.83971	0.0906366	1.34036	0.0676212	0.946087	NA
AC005832.4	0	NA	NA	NA	NA	NA
AC005833.1	0	NA	NA	NA	NA	NA
AC005833.2	0	NA	NA	NA	NA	NA
AC005833.3	0	NA	NA	NA	NA	NA
AC005837.1	2.01561	2.76533	3.01232	0.918007	0.358615	NA
AC005837.2	0	NA	NA	NA	NA	NA
AC005837.3	6.93886	3.92059	1.51442	2.58883	0.00963027	NA
AC005838.1	0	NA	NA	NA	NA	NA
AC005838.2	11.8945	0.607399	1.27567	0.476142	0.633973	0.872581
AC005839.1	63.7675	1.51321	0.844722	1.79138	0.0732331	0.338089
AC005840.1	14.1855	0.703642	0.952873	0.738443	0.460246	0.78372
AC005840.2	4.59412	-1.79464	2.98747	-0.600724	0.548024	NA
AC005840.3	21.9981	2.15775	0.949782	2.27184	0.023096	0.174562
AC005840.4	3.53749	2.33319	2.10563	1.10807	0.267832	NA
AC005841.1	0	NA	NA	NA	NA	NA
AC005842.1	8.85576	-1.57541	2.17748	-0.723502	0.469372	0.788815
AC005845.1	2.62112	0.453635	2.97685	0.152388	0.878881	NA
AC005856.1	1.54028	1.87694	3.0417	0.617068	0.53719	NA
AC005858.1	0	NA	NA	NA	NA	NA
AC005858.2	0	NA	NA	NA	NA	NA
AC005858.3	0	NA	NA	NA	NA	NA
AC005863.1	0	NA	NA	NA	NA	NA
AC005865.1	0	NA	NA	NA	NA	NA
AC005865.2	0	NA	NA	NA	NA	NA
AC005868.1	0	NA	NA	NA	NA	NA
AC005871.1	0	NA	NA	NA	NA	NA
AC005871.2	1.70351	-1.62932	3.04396	-0.535264	0.592467	NA
AC005884.1	1.27819	0.801117	3.08939	0.259313	0.795394	NA
AC005884.2	0	NA	NA	NA	NA	NA
AC005899.1	0.927606	-0.0742806	3.0822	-0.0240999	0.980773	NA
AC005899.2	0	NA	NA	NA	NA	NA
AC005899.3	0	NA	NA	NA	NA	NA
AC005899.4	0	NA	NA	NA	NA	NA
AC005899.5	3.22262	4.49036	3.03889	1.47763	0.139507	NA
AC005899.6	4.4027	2.86726	2.37261	1.20848	0.226862	NA
AC005899.7	4.16495	1.63652	2.00736	0.815261	0.414923	NA
AC005899.8	4.92452	-0.932082	1.9003	-0.490493	0.623785	NA
AC005901.1	0	NA	NA	NA	NA	NA
AC005906.1	0.595328	-0.92003	3.09874	-0.296905	0.766539	NA
AC005906.2	0	NA	NA	NA	NA	NA
AC005908.1	0	NA	NA	NA	NA	NA
AC005908.2	0	NA	NA	NA	NA	NA
AC005909.1	0	NA	NA	NA	NA	NA
AC005911.1	17.9208	-1.71987	1.15123	-1.49394	0.135192	0.464114
AC005912.1	337.986	0.3835	0.405011	0.946887	0.343696	0.707498
AC005912.2	0	NA	NA	NA	NA	NA
AC005915.1	0	NA	NA	NA	NA	NA
AC005920.1	19.171	0.842953	1.88641	0.446855	0.65498	0.881606
AC005920.2	4.09263	0.612215	3.04025	0.20137	0.840409	NA
AC005920.3	0	NA	NA	NA	NA	NA
AC005920.4	0	NA	NA	NA	NA	NA
AC005921.1	0	NA	NA	NA	NA	NA
AC005921.2	0	NA	NA	NA	NA	NA
AC005921.3	44.7763	0.276081	0.631313	0.437313	0.661884	0.884063
AC005943.1	0	NA	NA	NA	NA	NA
AC005943.2	0	NA	NA	NA	NA	NA
AC005944.1	0	NA	NA	NA	NA	NA
AC005951.1	0	NA	NA	NA	NA	NA
AC005954.1	0	NA	NA	NA	NA	NA
AC005954.2	0	NA	NA	NA	NA	NA
AC005962.1	1.86317	0.348996	3.04526	0.114603	0.90876	NA
AC005972.1	14.8544	-0.842954	1.16878	-0.721228	0.470769	0.78899
AC005972.2	0	NA	NA	NA	NA	NA
AC005972.3	0	NA	NA	NA	NA	NA
AC005972.4	1.90939	-1.2713	3.10575	-0.409337	0.682292	NA
AC005993.1	0	NA	NA	NA	NA	NA
AC005996.1	0	NA	NA	NA	NA	NA
AC005999.1	0	NA	NA	NA	NA	NA
AC006001.1	3.62325	1.25191	2.31367	0.541094	0.588443	NA
AC006001.2	37.8079	-1.86638	1.09206	-1.70906	0.0874406	0.370044
AC006001.3	1103.49	0.155985	0.335007	0.465617	0.64149	0.87689
AC006001.4	0	NA	NA	NA	NA	NA
AC006003.1	0	NA	NA	NA	NA	NA
AC006004.1	0	NA	NA	NA	NA	NA
AC006006.1	0	NA	NA	NA	NA	NA
AC006007.1	0	NA	NA	NA	NA	NA
AC006011.1	0	NA	NA	NA	NA	NA
AC006011.2	0	NA	NA	NA	NA	NA
AC006012.1	18.1405	-0.931515	1.78111	-0.522998	0.600975	0.858144
AC006013.1	0	NA	NA	NA	NA	NA
AC006015.1	0	NA	NA	NA	NA	NA
AC006017.1	1.15025	0.984299	3.06041	0.321623	0.747739	NA
AC006019.1	0	NA	NA	NA	NA	NA
AC006019.2	0	NA	NA	NA	NA	NA
AC006019.3	0	NA	NA	NA	NA	NA
AC006020.1	0	NA	NA	NA	NA	NA
AC006022.1	0	NA	NA	NA	NA	NA
AC006023.1	0.751212	0.848881	3.11589	0.272436	0.785287	NA
AC006023.2	0	NA	NA	NA	NA	NA
AC006026.1	21.0106	0.170866	0.830118	0.205833	0.836921	0.952235
AC006026.2	0	NA	NA	NA	NA	NA
AC006026.3	3.41508	0.344179	2.27501	0.151287	0.879749	NA
AC006027.1	0	NA	NA	NA	NA	NA
AC006028.1	0.0754648	-0.711835	3.15405	-0.225689	0.821443	NA
AC006030.1	1.19161	1.29519	3.08907	0.419282	0.67501	NA
AC006033.1	22.8777	1.92875	0.858507	2.24663	0.0246637	0.180579
AC006033.2	35.0466	-0.719305	1.21942	-0.589875	0.555275	0.834192
AC006037.1	0	NA	NA	NA	NA	NA
AC006037.2	0	NA	NA	NA	NA	NA
AC006041.1	0	NA	NA	NA	NA	NA
AC006042.1	0.239232	-0.20143	3.13267	-0.0642996	0.948732	NA
AC006042.2	26.8994	0.585275	0.842589	0.694616	0.487296	0.799026
AC006042.3	49.427	4.31763	2.24476	1.92342	0.0544269	0.288269
AC006042.4	8.77624	-0.623388	2.02293	-0.308161	0.75796	NA
AC006055.1	0	NA	NA	NA	NA	NA
AC006058.1	0	NA	NA	NA	NA	NA
AC006058.2	0.15093	-0.96098	3.14559	-0.305501	0.759985	NA
AC006058.3	0.300485	0.780115	3.1361	0.248753	0.803552	NA
AC006058.4	0	NA	NA	NA	NA	NA
AC006059.1	6.64111	0.936473	1.40511	0.666477	0.505106	NA
AC006063.1	0.129444	0.576765	3.14535	0.183371	0.854507	NA
AC006063.2	0	NA	NA	NA	NA	NA
AC006064.1	0.136385	-0.939874	3.14451	-0.298894	0.765021	NA
AC006064.2	1.57014	3.05303	3.07791	0.991914	0.321239	NA
AC006064.3	3.10599	-0.452356	2.99586	-0.150994	0.879981	NA
AC006064.4	0	NA	NA	NA	NA	NA
AC006064.5	0	NA	NA	NA	NA	NA
AC006064.6	0	NA	NA	NA	NA	NA
AC006065.1	0	NA	NA	NA	NA	NA
AC006065.2	0	NA	NA	NA	NA	NA
AC006065.3	0	NA	NA	NA	NA	NA
AC006065.4	0	NA	NA	NA	NA	NA
AC006065.5	0	NA	NA	NA	NA	NA
AC006065.6	0	NA	NA	NA	NA	NA
AC006076.1	0	NA	NA	NA	NA	NA
AC006077.1	0	NA	NA	NA	NA	NA
AC006077.2	144.626	0.647523	0.73322	0.883123	0.37717	0.729676
AC006111.1	0	NA	NA	NA	NA	NA
AC006111.2	2.12251	1.10545	3.05427	0.361935	0.7174	NA
AC006111.3	0.300485	0.780115	3.1361	0.248753	0.803552	NA
AC006115.1	4.02368	-2.28751	3.06387	-0.746608	0.4553	NA
AC006115.2	0	NA	NA	NA	NA	NA
AC006115.3	0	NA	NA	NA	NA	NA
AC006116.1	6.73624	0.0364617	1.46731	0.0248493	0.980175	NA
AC006116.10	0.187754	0.833983	3.14361	0.265295	0.790782	NA
AC006116.2	0.234114	-0.812295	3.132	-0.259354	0.795362	NA
AC006116.3	0	NA	NA	NA	NA	NA
AC006116.4	6.20303	2.27254	1.99734	1.13778	0.255211	NA
AC006116.5	0.830792	-0.281273	3.10942	-0.0904581	0.927923	NA
AC006116.6	2.92455	-2.32893	3.0351	-0.767333	0.442884	NA
AC006116.7	0	NA	NA	NA	NA	NA
AC006116.8	4.17653	-3.9399	3.02116	-1.3041	0.192199	NA
AC006116.9	0.272771	-1.16344	3.13658	-0.370926	0.710692	NA
AC006122.1	41.9731	-0.154692	0.586385	-0.263806	0.791929	0.935877
AC006122.2	7.0774	1.20478	1.82501	0.660151	0.509157	NA
AC006128.1	74.4011	2.70714	0.899598	3.00928	0.00261872	0.0404586
AC006130.1	3.18214	1.67329	3.06381	0.546146	0.584966	NA
AC006130.2	0	NA	NA	NA	NA	NA
AC006133.1	0	NA	NA	NA	NA	NA
AC006141.1	31.557	2.05746	0.735749	2.79642	0.00516722	0.0647301
AC006144.1	0	NA	NA	NA	NA	NA
AC006145.1	0	NA	NA	NA	NA	NA
AC006146.1	0	NA	NA	NA	NA	NA
AC006148.1	0	NA	NA	NA	NA	NA
AC006148.2	0	NA	NA	NA	NA	NA
AC006150.1	0	NA	NA	NA	NA	NA
AC006153.1	0	NA	NA	NA	NA	NA
AC006157.1	2.81949	-0.269408	3.1016	-0.0868609	0.930782	NA
AC006158.1	0	NA	NA	NA	NA	NA
AC006159.1	0	NA	NA	NA	NA	NA
AC006159.2	0	NA	NA	NA	NA	NA
AC006160.1	2.27321	-2.93239	3.03304	-0.966815	0.333636	NA
AC006160.2	0	NA	NA	NA	NA	NA
AC006195.1	2.04592	1.3404	3.03627	0.441464	0.658877	NA
AC006197.1	0	NA	NA	NA	NA	NA
AC006199.1	0	NA	NA	NA	NA	NA
AC006205.1	0	NA	NA	NA	NA	NA
AC006205.2	1.93293	-2.29465	3.08036	-0.744929	0.456315	NA
AC006206.1	0	NA	NA	NA	NA	NA
AC006206.2	0.334337	-0.486381	3.11147	-0.156319	0.875782	NA
AC006207.1	5.68852	-1.24972	1.57357	-0.794192	0.427083	NA
AC006210.1	0.772581	-1.36282	3.09307	-0.440604	0.6595	NA
AC006210.2	6.69256	1.14126	1.26176	0.9045	0.36573	NA
AC006213.1	7.99226	3.9447	2.77873	1.41961	0.155723	NA
AC006213.2	24.074	-0.165572	1.29356	-0.127997	0.898152	0.968976
AC006213.3	15.8643	0.871219	0.807238	1.07926	0.280472	0.64767
AC006213.4	3.10606	2.37686	3.04687	0.780099	0.435332	NA
AC006213.5	0.768712	0.24321	3.08124	0.0789326	0.937086	NA
AC006213.6	0.929289	-0.0814222	3.07335	-0.026493	0.978864	NA
AC006236.1	0	NA	NA	NA	NA	NA
AC006237.1	3.04726	-0.787439	2.79866	-0.281363	0.778432	NA
AC006238.1	12.3244	3.51432	1.33344	2.63552	0.00840089	0.0898972
AC006249.1	0	NA	NA	NA	NA	NA
AC006252.1	23.0179	-1.06135	1.12458	-0.943776	0.345284	0.708544
AC006254.1	5.37	3.33605	3.00897	1.1087	0.26756	NA
AC006254.2	0	NA	NA	NA	NA	NA
AC006254.3	0	NA	NA	NA	NA	NA
AC006262.1	0.064722	0.329317	3.1536	0.104426	0.916831	NA
AC006262.2	0	NA	NA	NA	NA	NA
AC006262.3	0	NA	NA	NA	NA	NA
AC006262.4	0	NA	NA	NA	NA	NA
AC006270.1	1.42516	-0.858879	3.06609	-0.280122	0.779384	NA
AC006270.2	0	NA	NA	NA	NA	NA
AC006270.3	0	NA	NA	NA	NA	NA
AC006272.1	1.12633	0.632728	3.10874	0.203532	0.838719	NA
AC006272.2	0	NA	NA	NA	NA	NA
AC006273.1	1.35159	0.637207	3.10723	0.205073	0.837515	NA
AC006277.1	17.7664	0.141944	1.81331	0.0782788	0.937606	0.981669
AC006288.1	0	NA	NA	NA	NA	NA
AC006296.1	0	NA	NA	NA	NA	NA
AC006296.2	0	NA	NA	NA	NA	NA
AC006299.1	38.0407	0.675681	0.840456	0.803946	0.421428	0.761926
AC006305.1	0.117057	-0.751943	3.15917	-0.238019	0.811867	NA
AC006305.2	0.234114	-0.812295	3.132	-0.259354	0.795362	NA
AC006305.3	0	NA	NA	NA	NA	NA
AC006326.1	0	NA	NA	NA	NA	NA
AC006328.1	0	NA	NA	NA	NA	NA
AC006328.2	0	NA	NA	NA	NA	NA
AC006329.1	1.8918	0.823834	3.05439	0.269721	0.787375	NA
AC006329.2	0	NA	NA	NA	NA	NA
AC006330.1	8.68841	0.559002	1.88449	0.296634	0.766746	NA
AC006333.1	0	NA	NA	NA	NA	NA
AC006333.2	280.321	-0.932833	0.540593	-1.72557	0.0844245	0.363361
AC006335.1	0	NA	NA	NA	NA	NA
AC006335.2	0	NA	NA	NA	NA	NA
AC006335.3	0	NA	NA	NA	NA	NA
AC006338.1	0	NA	NA	NA	NA	NA
AC006338.2	0	NA	NA	NA	NA	NA
AC006349.1	0.451071	0.133449	3.12025	0.0427688	0.965886	NA
AC006355.1	0	NA	NA	NA	NA	NA
AC006355.2	0	NA	NA	NA	NA	NA
AC006357.1	0	NA	NA	NA	NA	NA
AC006362.1	0	NA	NA	NA	NA	NA
AC006363.1	0	NA	NA	NA	NA	NA
AC006366.1	0	NA	NA	NA	NA	NA
AC006369.1	2.80936	-0.881729	3.10236	-0.284213	0.776247	NA
AC006369.2	0	NA	NA	NA	NA	NA
AC006372.1	0	NA	NA	NA	NA	NA
AC006372.2	0	NA	NA	NA	NA	NA
AC006372.3	0.748547	-2.57877	3.09842	-0.832284	0.405248	NA
AC006372.4	0	NA	NA	NA	NA	NA
AC006378.1	4.2994	3.34793	1.9413	1.72458	0.0846031	NA
AC006378.2	0.816612	0.269424	3.10769	0.0866958	0.930913	NA
AC006380.1	0	NA	NA	NA	NA	NA
AC006386.1	0	NA	NA	NA	NA	NA
AC006386.2	0	NA	NA	NA	NA	NA
AC006387.1	4.20536	-0.721452	2.40102	-0.300477	0.763814	NA
AC006390.1	0	NA	NA	NA	NA	NA
AC006427.1	0	NA	NA	NA	NA	NA
AC006435.1	0	NA	NA	NA	NA	NA
AC006435.2	20.0284	4.32275	1.302	3.32008	0.000899903	0.0183395
AC006435.3	0	NA	NA	NA	NA	NA
AC006435.4	0	NA	NA	NA	NA	NA
AC006435.5	0	NA	NA	NA	NA	NA
AC006441.1	15.8752	0.417667	1.28801	0.324274	0.745731	0.922488
AC006441.2	0	NA	NA	NA	NA	NA
AC006441.3	0	NA	NA	NA	NA	NA
AC006441.4	0	NA	NA	NA	NA	NA
AC006441.5	0	NA	NA	NA	NA	NA
AC006445.1	0	NA	NA	NA	NA	NA
AC006445.2	0	NA	NA	NA	NA	NA
AC006449.1	0	NA	NA	NA	NA	NA
AC006449.2	0.180825	-0.144659	3.15489	-0.0458524	0.963428	NA
AC006449.3	0.341738	1.14295	3.14352	0.363589	0.716165	NA
AC006449.5	2.44011	-0.288887	3.09373	-0.0933781	0.925603	NA
AC006449.6	175.107	0.278625	0.564319	0.493737	0.621492	0.86716
AC006449.7	0	NA	NA	NA	NA	NA
AC006450.1	0	NA	NA	NA	NA	NA
AC006450.2	0	NA	NA	NA	NA	NA
AC006450.3	0	NA	NA	NA	NA	NA
AC006453.1	0	NA	NA	NA	NA	NA
AC006453.2	94.4202	-0.310006	0.466247	-0.664897	0.506117	0.808936
AC006453.3	0	NA	NA	NA	NA	NA
AC006453.4	0	NA	NA	NA	NA	NA
AC006453.5	0	NA	NA	NA	NA	NA
AC006455.1	0	NA	NA	NA	NA	NA
AC006455.2	0	NA	NA	NA	NA	NA
AC006455.3	0	NA	NA	NA	NA	NA
AC006455.4	0	NA	NA	NA	NA	NA
AC006455.5	0	NA	NA	NA	NA	NA
AC006455.6	0	NA	NA	NA	NA	NA
AC006455.7	0	NA	NA	NA	NA	NA
AC006455.8	0	NA	NA	NA	NA	NA
AC006457.1	0	NA	NA	NA	NA	NA
AC006458.1	0	NA	NA	NA	NA	NA
AC006460.1	0.402529	-0.597305	3.10202	-0.192553	0.847309	NA
AC006460.2	66.5601	1.45735	0.631986	2.30599	0.021111	0.164975
AC006461.1	0	NA	NA	NA	NA	NA
AC006463.1	0	NA	NA	NA	NA	NA
AC006466.1	0	NA	NA	NA	NA	NA
AC006480.1	0.535746	1.65918	3.09892	0.535406	0.592369	NA
AC006480.2	4.42334	1.12184	1.60121	0.700619	0.483541	NA
AC006482.1	0	NA	NA	NA	NA	NA
AC006483.1	53.4726	-2.08904	0.697311	-2.99584	0.00273687	0.0418161
AC006483.2	1.36265	-1.09354	3.04797	-0.358778	0.719761	NA
AC006484.1	0	NA	NA	NA	NA	NA
AC006486.1	0	NA	NA	NA	NA	NA
AC006486.2	15.1359	-0.356096	1.19724	-0.297432	0.766137	0.930951
AC006487.1	0	NA	NA	NA	NA	NA
AC006487.2	0	NA	NA	NA	NA	NA
AC006499.1	0	NA	NA	NA	NA	NA
AC006499.2	0	NA	NA	NA	NA	NA
AC006499.3	0	NA	NA	NA	NA	NA
AC006499.4	0	NA	NA	NA	NA	NA
AC006499.5	0	NA	NA	NA	NA	NA
AC006499.6	2.10702	-0.879341	3.10334	-0.283353	0.776906	NA
AC006499.7	0	NA	NA	NA	NA	NA
AC006499.8	0	NA	NA	NA	NA	NA
AC006504.1	29.252	4.02671	1.69199	2.37986	0.0173192	0.14464
AC006504.2	0	NA	NA	NA	NA	NA
AC006504.3	24.0998	1.5108	1.32842	1.13729	0.255415	0.620397
AC006504.4	0	NA	NA	NA	NA	NA
AC006504.5	147.495	-0.335828	0.694211	-0.483755	0.62856	0.869886
AC006504.6	0	NA	NA	NA	NA	NA
AC006504.7	0.225265	0.544415	3.14033	0.173362	0.862367	NA
AC006504.8	3.27048	1.43825	3.03895	0.473271	0.63602	NA
AC006509.1	0	NA	NA	NA	NA	NA
AC006509.2	0	NA	NA	NA	NA	NA
AC006511.1	0.232946	0.373771	3.12899	0.119454	0.904916	NA
AC006511.2	10.723	1.83203	1.45267	1.26115	0.207256	0.563628
AC006511.3	574.928	0.322454	0.387504	0.83213	0.405336	0.751546
AC006511.4	2.70469	-0.597161	3.07629	-0.194117	0.846084	NA
AC006511.5	0.480561	-1.70755	3.12741	-0.545996	0.585068	NA
AC006512.1	3.7905	-0.201106	3.04972	-0.0659426	0.947424	NA
AC006512.2	0	NA	NA	NA	NA	NA
AC006517.1	0.0751212	0.319974	3.15214	0.10151	0.919146	NA
AC006518.1	0.117057	-0.751943	3.15917	-0.238019	0.811867	NA
AC006518.2	0.548753	-2.18281	3.1132	-0.701146	0.483212	NA
AC006518.7	0	NA	NA	NA	NA	NA
AC006529.1	1.38251	1.7704	3.08941	0.573056	0.566607	NA
AC006530.1	0	NA	NA	NA	NA	NA
AC006538.1	19.8366	-1.15919	1.77893	-0.651623	0.514645	0.813071
AC006538.2	0	NA	NA	NA	NA	NA
AC006538.3	0.328222	-0.758103	3.12922	-0.242266	0.808574	NA
AC006539.1	2.59115	-2.20916	2.50367	-0.882367	0.377578	NA
AC006539.2	2.7358	-0.0247659	3.05637	-0.00810303	0.993535	NA
AC006539.3	1.60342	-0.802468	1.97932	-0.405427	0.685164	NA
AC006547.1	66.3496	-0.610256	0.564971	-1.08015	0.280074	0.647386
AC006547.2	0	NA	NA	NA	NA	NA
AC006547.3	0	NA	NA	NA	NA	NA
AC006548.1	0	NA	NA	NA	NA	NA
AC006548.2	0	NA	NA	NA	NA	NA
AC006548.3	0	NA	NA	NA	NA	NA
AC006557.1	0	NA	NA	NA	NA	NA
AC006557.2	0	NA	NA	NA	NA	NA
AC006557.3	0	NA	NA	NA	NA	NA
AC006557.4	0	NA	NA	NA	NA	NA
AC006557.5	0.528253	-1.13614	3.11789	-0.364395	0.715563	NA
AC006557.6	0	NA	NA	NA	NA	NA
AC006566.1	2.74559	-1.01332	2.74201	-0.369552	0.711717	NA
AC006581.1	0	NA	NA	NA	NA	NA
AC006581.2	0.820712	0.656033	3.09363	0.212059	0.832061	NA
AC006600.1	0	NA	NA	NA	NA	NA
AC006600.2	0	NA	NA	NA	NA	NA
AC006840.1	0	NA	NA	NA	NA	NA
AC006924.1	0	NA	NA	NA	NA	NA
AC006927.1	2.84233	-1.19832	1.69926	-0.705201	0.480685	NA
AC006927.2	0	NA	NA	NA	NA	NA
AC006927.3	0	NA	NA	NA	NA	NA
AC006927.4	0	NA	NA	NA	NA	NA
AC006927.5	0	NA	NA	NA	NA	NA
AC006942.1	1.13218	-3.01442	3.08995	-0.975556	0.329284	NA
AC006946.1	0.691157	1.33239	3.10529	0.429071	0.667872	NA
AC006946.2	0.328222	-0.758103	3.12922	-0.242266	0.808574	NA
AC006946.3	0	NA	NA	NA	NA	NA
AC006947.1	0	NA	NA	NA	NA	NA
AC006960.1	0.0681927	-0.698551	3.15201	-0.221621	0.824609	NA
AC006960.2	0.759766	0.780068	3.07602	0.253597	0.799807	NA
AC006960.3	3.46415	0.525339	3.1015	0.169382	0.865496	NA
AC006963.1	0	NA	NA	NA	NA	NA
AC006965.1	0	NA	NA	NA	NA	NA
AC006967.1	0	NA	NA	NA	NA	NA
AC006967.2	0	NA	NA	NA	NA	NA
AC006967.3	0	NA	NA	NA	NA	NA
AC006970.1	27.5822	0.0878592	0.704814	0.124656	0.900796	0.969408
AC006970.2	0	NA	NA	NA	NA	NA
AC006971.1	8.82617	-0.117661	1.05093	-0.111959	0.910856	NA
AC006974.1	0	NA	NA	NA	NA	NA
AC006974.2	2.77605	0.318882	3.05279	0.104456	0.916808	NA
AC006978.1	364.835	0.737422	0.517909	1.42384	0.154492	0.494577
AC006978.2	0	NA	NA	NA	NA	NA
AC006986.1	0	NA	NA	NA	NA	NA
AC006987.1	0	NA	NA	NA	NA	NA
AC006987.2	0	NA	NA	NA	NA	NA
AC006987.3	0	NA	NA	NA	NA	NA
AC006987.4	0	NA	NA	NA	NA	NA
AC006989.1	0	NA	NA	NA	NA	NA
AC006994.1	0.675796	0.615596	3.1146	0.197649	0.84332	NA
AC006994.2	3.15261	0.0966466	2.54305	0.0380042	0.969684	NA
AC007000.1	53.6855	-0.325116	0.554832	-0.585972	0.557894	0.835169
AC007000.2	1.46063	2.8814	3.09009	0.932465	0.351096	NA
AC007000.3	6.83035	-2.1039	1.9881	-1.05825	0.289943	NA
AC007001.1	0.815311	0.416501	3.10831	0.133996	0.893406	NA
AC007003.1	0	NA	NA	NA	NA	NA
AC007009.1	0	NA	NA	NA	NA	NA
AC007012.1	0	NA	NA	NA	NA	NA
AC007012.2	0	NA	NA	NA	NA	NA
AC007014.1	0	NA	NA	NA	NA	NA
AC007014.2	18.1565	2.18014	0.973412	2.23969	0.025111	0.182444
AC007016.1	0.465892	0.403029	3.11475	0.129394	0.897046	NA
AC007029.1	1.7369	-0.773431	3.03934	-0.254473	0.79913	NA
AC007032.1	0.834934	-2.13394	3.06951	-0.695206	0.486926	NA
AC007036.1	2.51037	0.153061	3.05806	0.0500515	0.960081	NA
AC007036.2	10.4043	0.220631	1.5778	0.139834	0.888791	0.966726
AC007036.3	0	NA	NA	NA	NA	NA
AC007038.1	10.288	0.410515	1.17576	0.349149	0.726977	0.915649
AC007038.2	2.81944	3.64939	2.99748	1.21749	0.223419	NA
AC007040.1	0.820554	-0.794203	3.11188	-0.255217	0.798556	NA
AC007040.2	2.6261	-0.768398	3.0541	-0.251596	0.801354	NA
AC007041.1	77.8215	0.647615	0.535507	1.20935	0.226529	0.585924
AC007064.1	0	NA	NA	NA	NA	NA
AC007064.2	2.46166	-0.811799	3.10363	-0.261564	0.793657	NA
AC007064.3	0	NA	NA	NA	NA	NA
AC007064.4	0	NA	NA	NA	NA	NA
AC007066.1	32.3648	0.0810209	0.590299	0.137254	0.89083	0.96708
AC007066.2	42.3258	1.38761	1.03495	1.34075	0.18	0.530869
AC007068.1	0	NA	NA	NA	NA	NA
AC007068.2	0.564293	-0.352111	3.08948	-0.113971	0.909261	NA
AC007091.1	4.08197	-0.636852	3.04943	-0.208843	0.834571	NA
AC007098.1	0	NA	NA	NA	NA	NA
AC007099.1	0	NA	NA	NA	NA	NA
AC007099.2	0	NA	NA	NA	NA	NA
AC007100.1	2.02328	1.01647	3.01973	0.336608	0.736412	NA
AC007106.1	0	NA	NA	NA	NA	NA
AC007114.1	38.9065	-0.430807	0.837938	-0.514128	0.607162	0.861197
AC007114.2	2.91182	0.43004	3.10191	0.138637	0.889737	NA
AC007115.1	0	NA	NA	NA	NA	NA
AC007126.1	0	NA	NA	NA	NA	NA
AC007128.1	2.24929	2.65917	3.06825	0.866674	0.386121	NA
AC007128.2	0	NA	NA	NA	NA	NA
AC007136.1	0	NA	NA	NA	NA	NA
AC007151.1	0.971019	-0.727009	3.0709	-0.236742	0.812857	NA
AC007159.1	0	NA	NA	NA	NA	NA
AC007160.1	0.117057	-0.751943	3.15917	-0.238019	0.811867	NA
AC007161.1	13.8262	0.199247	0.753777	0.264332	0.791524	0.935854
AC007161.2	0.187754	0.833983	3.14361	0.265295	0.790782	NA
AC007161.3	0	NA	NA	NA	NA	NA
AC007163.1	1.16933	-0.781786	3.01219	-0.259541	0.795218	NA
AC007179.1	0	NA	NA	NA	NA	NA
AC007179.2	3.92551	2.44358	3.06154	0.798155	0.424781	NA
AC007179.3	0	NA	NA	NA	NA	NA
AC007182.1	1.26933	1.58947	3.09002	0.51439	0.60698	NA
AC007182.2	95.0739	0.3708	0.429458	0.863413	0.38791	0.737522
AC007191.1	7.06669	1.90811	2.30497	0.827822	0.407771	NA
AC007192.1	1.46382	-1.70323	3.09363	-0.550561	0.581934	NA
AC007192.2	0	NA	NA	NA	NA	NA
AC007193.1	0	NA	NA	NA	NA	NA
AC007193.2	0	NA	NA	NA	NA	NA
AC007193.3	0	NA	NA	NA	NA	NA
AC007204.1	2.25298	0.912742	3.07542	0.296786	0.76663	NA
AC007204.2	0	NA	NA	NA	NA	NA
AC007207.1	0	NA	NA	NA	NA	NA
AC007207.2	0.15093	-0.96098	3.14559	-0.305501	0.759985	NA
AC007215.1	0	NA	NA	NA	NA	NA
AC007216.1	5.38517	1.08434	2.49873	0.433958	0.664319	NA
AC007216.2	14.9607	1.46781	1.09299	1.34293	0.179295	0.529738
AC007216.3	26.3199	0.36607	0.854812	0.428247	0.668471	0.887433
AC007216.4	11.5767	0.0543655	1.11579	0.0487239	0.961139	0.988386
AC007216.5	0.375508	1.29359	3.12738	0.413633	0.679143	NA
AC007218.1	0.150242	0.561815	3.14458	0.178662	0.858203	NA
AC007218.2	0	NA	NA	NA	NA	NA
AC007220.1	5.4374	0.232856	3.10064	0.0750993	0.940136	NA
AC007221.1	0	NA	NA	NA	NA	NA
AC007221.2	0	NA	NA	NA	NA	NA
AC007223.1	0	NA	NA	NA	NA	NA
AC007224.1	0	NA	NA	NA	NA	NA
AC007224.2	0.826923	1.13766	3.0827	0.369046	0.712094	NA
AC007225.1	2.70408	1.37785	3.03397	0.454141	0.649728	NA
AC007225.2	0	NA	NA	NA	NA	NA
AC007228.1	0.218435	0.053634	3.14172	0.0170716	0.98638	NA
AC007228.2	8.62785	-0.0994084	1.21271	-0.0819721	0.934669	NA
AC007229.1	19.2562	-0.513844	0.726894	-0.706904	0.479626	0.793975
AC007237.1	0	NA	NA	NA	NA	NA
AC007238.1	122.688	-0.279325	0.50169	-0.556769	0.577686	0.846985
AC007240.1	39.6616	0.707143	1.15667	0.611363	0.54096	0.827227
AC007241.1	0	NA	NA	NA	NA	NA
AC007249.1	6.36076	-1.48717	2.45402	-0.606014	0.544506	NA
AC007249.2	23.4325	-1.1763	1.07529	-1.09394	0.273983	0.641443
AC007250.1	4.69922	0.780988	1.66333	0.469534	0.638688	NA
AC007253.1	0	NA	NA	NA	NA	NA
AC007255.1	5.4617	-0.0808446	2.19349	-0.0368567	0.970599	NA
AC007255.2	0	NA	NA	NA	NA	NA
AC007256.1	57.91	-0.747889	0.544577	-1.37334	0.169647	0.517505
AC007262.1	0	NA	NA	NA	NA	NA
AC007262.2	100.078	-2.54463	1.20164	-2.11763	0.0342064	0.218734
AC007271.1	0	NA	NA	NA	NA	NA
AC007272.1	0	NA	NA	NA	NA	NA
AC007274.1	0	NA	NA	NA	NA	NA
AC007274.2	0	NA	NA	NA	NA	NA
AC007274.3	0	NA	NA	NA	NA	NA
AC007275.1	0	NA	NA	NA	NA	NA
AC007277.1	0	NA	NA	NA	NA	NA
AC007278.1	0.150242	0.561815	3.14458	0.178662	0.858203	NA
AC007278.2	0.467059	-0.269989	3.093	-0.0872904	0.930441	NA
AC007279.1	0	NA	NA	NA	NA	NA
AC007283.1	0	NA	NA	NA	NA	NA
AC007283.2	1.75221	-0.493064	3.04228	-0.162071	0.87125	NA
AC007285.1	42.405	1.07076	0.519755	2.06013	0.0393865	0.237429
AC007285.2	9.25822	-2.43793	1.44271	-1.68983	0.0910609	0.378732
AC007292.1	3.2379	1.28909	1.84673	0.69804	0.485152	NA
AC007292.2	20.895	1.82944	0.999173	1.83095	0.0671076	0.322691
AC007292.3	0.744096	1.36977	3.09844	0.442083	0.658429	NA
AC007298.1	2.77713	1.05054	3.0659	0.342654	0.731859	NA
AC007298.2	2.82189	0.398567	2.28849	0.174162	0.861738	NA
AC007308.1	0	NA	NA	NA	NA	NA
AC007312.1	0	NA	NA	NA	NA	NA
AC007314.1	1.1555	-1.82728	3.05982	-0.597186	0.550383	NA
AC007318.1	238.428	-0.105438	0.376701	-0.279899	0.779555	0.93358
AC007318.2	0.736237	-0.301829	3.07559	-0.0981371	0.921823	NA
AC007319.1	30.0803	0.079465	0.698578	0.113752	0.909434	0.972236
AC007322.1	0	NA	NA	NA	NA	NA
AC007322.2	0	NA	NA	NA	NA	NA
AC007322.3	0	NA	NA	NA	NA	NA
AC007322.4	0	NA	NA	NA	NA	NA
AC007325.1	0	NA	NA	NA	NA	NA
AC007325.2	0	NA	NA	NA	NA	NA
AC007325.3	0	NA	NA	NA	NA	NA
AC007325.4	0	NA	NA	NA	NA	NA
AC007326.1	0	NA	NA	NA	NA	NA
AC007326.2	0	NA	NA	NA	NA	NA
AC007326.3	0	NA	NA	NA	NA	NA
AC007326.4	0	NA	NA	NA	NA	NA
AC007326.5	0	NA	NA	NA	NA	NA
AC007327.1	0	NA	NA	NA	NA	NA
AC007327.2	0	NA	NA	NA	NA	NA
AC007333.1	0	NA	NA	NA	NA	NA
AC007333.2	0	NA	NA	NA	NA	NA
AC007336.1	18.7092	1.3287	1.26229	1.05261	0.292521	0.66045
AC007336.2	0	NA	NA	NA	NA	NA
AC007336.3	0	NA	NA	NA	NA	NA
AC007342.1	6.01649	0.470642	2.00583	0.234637	0.814491	NA
AC007342.2	0	NA	NA	NA	NA	NA
AC007342.3	65.8646	-2.79851	0.845588	-3.30954	0.00093449	0.0189113
AC007342.4	4.24842	-0.400763	3.10095	-0.129239	0.897169	NA
AC007342.5	2.99114	-0.818072	3.10207	-0.263718	0.791997	NA
AC007342.6	1.28969	-0.928108	3.02953	-0.306354	0.759335	NA
AC007342.7	4.04001	0.304622	2.98211	0.10215	0.918638	NA
AC007342.8	0.819398	-0.864786	3.10938	-0.278121	0.780919	NA
AC007342.9	0.234114	-0.812295	3.132	-0.259354	0.795362	NA
AC007344.1	0	NA	NA	NA	NA	NA
AC007346.1	0	NA	NA	NA	NA	NA
AC007346.2	0	NA	NA	NA	NA	NA
AC007347.1	0	NA	NA	NA	NA	NA
AC007347.2	0	NA	NA	NA	NA	NA
AC007349.1	0.955276	2.62044	3.09362	0.847044	0.39697	NA
AC007349.2	0.234114	-0.812295	3.132	-0.259354	0.795362	NA
AC007349.3	12.2801	2.02166	3.07711	0.657	0.511181	0.811566
AC007349.4	2.47041	0.022867	3.06547	0.00745955	0.994048	NA
AC007359.1	0	NA	NA	NA	NA	NA
AC007362.1	0.164111	-0.704643	3.15474	-0.22336	0.823255	NA
AC007363.1	0	NA	NA	NA	NA	NA
AC007364.1	0.0681927	-0.698551	3.15201	-0.221621	0.824609	NA
AC007365.1	22.4498	1.22479	1.7653	0.693813	0.487799	0.799336
AC007365.2	0.450531	0.595756	3.12154	0.190853	0.848641	NA
AC007368.1	0	NA	NA	NA	NA	NA
AC007368.2	0	NA	NA	NA	NA	NA
AC007370.1	0	NA	NA	NA	NA	NA
AC007370.2	0	NA	NA	NA	NA	NA
AC007375.1	0.265829	-0.249894	3.12468	-0.0799743	0.936258	NA
AC007375.2	0	NA	NA	NA	NA	NA
AC007375.3	0	NA	NA	NA	NA	NA
AC007376.1	0	NA	NA	NA	NA	NA
AC007376.2	0.73878	-1.69252	3.11137	-0.543979	0.586456	NA
AC007378.1	0	NA	NA	NA	NA	NA
AC007381.1	10.5658	2.47616	3.0717	0.806118	0.420175	0.761352
AC007382.1	20.9361	0.299024	1.18822	0.251658	0.801305	0.938934
AC007383.1	0.395273	-0.190137	3.10563	-0.0612233	0.951181	NA
AC007383.2	463.635	1.0658	0.607822	1.75347	0.0795212	0.352179
AC007383.3	0	NA	NA	NA	NA	NA
AC007383.4	3.5117	-0.883172	3.10176	-0.284732	0.775849	NA
AC007384.1	223.904	1.0648	0.473693	2.24786	0.0245849	0.180401
AC007386.1	0.129444	0.576765	3.14535	0.183371	0.854507	NA
AC007387.1	1900-01-27 17:50:21	0.836687	0.761641	1.09853	0.271972	0.640114
AC007388.1	194.926	-0.638966	0.570117	-1.12076	0.262389	0.629248
AC007389.1	1.48463	0.518217	3.1043	0.166935	0.867421	NA
AC007389.2	0	NA	NA	NA	NA	NA
AC007389.3	0.129444	0.576765	3.14535	0.183371	0.854507	NA
AC007389.4	0.64722	0.792168	3.11339	0.25444	0.799156	NA
AC007389.5	0	NA	NA	NA	NA	NA
AC007390.1	0	NA	NA	NA	NA	NA
AC007390.2	12.4143	-0.521235	1.45578	-0.358045	0.72031	0.912139
AC007391.1	8.07521	2.98478	3.04783	0.979313	0.327425	NA
AC007394.1	0	NA	NA	NA	NA	NA
AC007395.1	1.29259	-2.31315	3.05113	-0.758129	0.448374	NA
AC007402.1	0	NA	NA	NA	NA	NA
AC007403.1	0	NA	NA	NA	NA	NA
AC007405.1	5.66819	-2.24233	3.00444	-0.746338	0.455463	NA
AC007405.2	0.150242	0.561815	3.14458	0.178662	0.858203	NA
AC007405.3	1.35837	-1.17327	3.10701	-0.377621	0.705712	NA
AC007406.1	0.150242	0.561815	3.14458	0.178662	0.858203	NA
AC007406.2	0	NA	NA	NA	NA	NA
AC007406.3	4.13128	-1.09966	3.0038	-0.36609	0.714298	NA
AC007406.4	0	NA	NA	NA	NA	NA
AC007406.5	91.8705	0.405282	0.563731	0.718928	0.472185	0.78921
AC007422.1	0	NA	NA	NA	NA	NA
AC007422.2	0.246447	-0.944295	3.1424	-0.300501	0.763795	NA
AC007423.1	0	NA	NA	NA	NA	NA
AC007424.1	0	NA	NA	NA	NA	NA
AC007431.1	1.61624	1.38882	3.04146	0.456629	0.647938	NA
AC007431.2	0.95254	0.159919	3.09611	0.0516516	0.958806	NA
AC007431.3	0	NA	NA	NA	NA	NA
AC007435.1	0	NA	NA	NA	NA	NA
AC007448.1	0	NA	NA	NA	NA	NA
AC007448.2	6.3751	-0.291103	2.0287	-0.143493	0.885901	NA
AC007448.3	16.5855	-1.35501	1.267	-1.06946	0.284861	0.652506
AC007450.1	0.505717	-0.384785	3.11261	-0.123621	0.901615	NA
AC007450.2	1.12633	0.632728	3.10874	0.203532	0.838719	NA
AC007450.3	0	NA	NA	NA	NA	NA
AC007450.4	0	NA	NA	NA	NA	NA
AC007458.1	0	NA	NA	NA	NA	NA
AC007463.1	1.52855	0.483817	3.10433	0.155852	0.87615	NA
AC007485.1	0	NA	NA	NA	NA	NA
AC007485.2	34.9257	-0.2004	1.24083	-0.161505	0.871695	0.961509
AC007490.1	0	NA	NA	NA	NA	NA
AC007491.1	0	NA	NA	NA	NA	NA
AC007493.1	0	NA	NA	NA	NA	NA
AC007493.2	2.72407	1.36605	2.99789	0.45567	0.648627	NA
AC007494.1	1.01369	0.629787	3.10974	0.202521	0.839509	NA
AC007494.2	2.23061	-0.611028	3.02051	-0.202293	0.839687	NA
AC007494.3	4.97083	0.476013	2.31918	0.20525	0.837377	NA
AC007495.1	0.0754648	-0.711835	3.15405	-0.225689	0.821443	NA
AC007495.2	0	NA	NA	NA	NA	NA
AC007496.1	0	NA	NA	NA	NA	NA
AC007496.2	4.44317	2.01005	2.83597	0.70877	0.478467	NA
AC007496.3	2.81602	1.98498	3.0852	0.643387	0.519973	NA
AC007497.1	0.123224	-0.734062	3.15698	-0.23252	0.816134	NA
AC007513.1	0	NA	NA	NA	NA	NA
AC007527.1	0	NA	NA	NA	NA	NA
AC007527.2	0	NA	NA	NA	NA	NA
AC007529.1	00:00:00	NA	NA	NA	NA	NA
AC007529.2	0.873343	-1.83959	3.11085	-0.591348	0.554288	NA
AC007533.1	6.38484	2.34024	1.988	1.17718	0.239123	NA
AC007536.1	0	NA	NA	NA	NA	NA
AC007537.1	129.463	-0.073123	0.465415	-0.157113	0.875155	0.962381
AC007537.2	1.57204	1.84363	2.13616	0.863058	0.388106	NA
AC007540.1	0	NA	NA	NA	NA	NA
AC007541.1	26.01	-1.8252	1.03572	-1.76225	0.0780275	0.349516
AC007546.1	18.3993	0.863503	1.27022	0.679805	0.496628	0.803925
AC007546.2	0.463803	-0.13445	3.11786	-0.0431226	0.965604	NA
AC007547.1	3.22197	3.05796	2.00423	1.52575	0.127071	NA
AC007547.2	0	NA	NA	NA	NA	NA
AC007551.1	1.60679	-1.72099	3.04016	-0.566087	0.571335	NA
AC007551.2	0	NA	NA	NA	NA	NA
AC007552.1	0	NA	NA	NA	NA	NA
AC007552.2	0	NA	NA	NA	NA	NA
AC007556.1	0.15093	-0.96098	3.14559	-0.305501	0.759985	NA
AC007557.1	0	NA	NA	NA	NA	NA
AC007557.2	0	NA	NA	NA	NA	NA
AC007557.3	0	NA	NA	NA	NA	NA
AC007557.4	0	NA	NA	NA	NA	NA
AC007559.1	0	NA	NA	NA	NA	NA
AC007560.1	19.3497	-0.460896	0.642209	-0.717674	0.472958	0.789574
AC007562.1	0.15093	-0.96098	3.14559	-0.305501	0.759985	NA
AC007563.1	1.48463	0.518217	3.1043	0.166935	0.867421	NA
AC007563.2	6.09176	-0.119421	3.05992	-0.0390275	0.968868	NA
AC007563.3	0	NA	NA	NA	NA	NA
AC007566.1	4.57414	2.55417	1.8095	1.41153	0.158087	NA
AC007566.2	0	NA	NA	NA	NA	NA
AC007568.1	0	NA	NA	NA	NA	NA
AC007569.1	9.05675	2.13758	1.91274	1.11755	0.263759	0.631176
AC007570.1	1.40026	-0.164167	3.10408	-0.0528876	0.957821	NA
AC007595.1	0	NA	NA	NA	NA	NA
AC007598.1	1.13326	1.07145	3.05516	0.350703	0.725811	NA
AC007598.2	0.681927	-1.23307	3.11614	-0.395706	0.692322	NA
AC007598.3	3.07368	1.50499	3.04085	0.494925	0.620653	NA
AC007599.1	0	NA	NA	NA	NA	NA
AC007599.2	0	NA	NA	NA	NA	NA
AC007601.1	5.6749	-1.02777	2.37445	-0.432847	0.665126	NA
AC007601.2	0	NA	NA	NA	NA	NA
AC007603.1	0	NA	NA	NA	NA	NA
AC007603.2	0	NA	NA	NA	NA	NA
AC007603.3	0	NA	NA	NA	NA	NA
AC007608.1	0	NA	NA	NA	NA	NA
AC007608.2	0	NA	NA	NA	NA	NA
AC007608.3	7.36219	-5.93579	2.49189	-2.38204	0.0172169	NA
AC007608.4	15.2949	3.04398	2.03784	1.49373	0.135247	0.464114
AC007610.1	0.35117	-0.835551	3.12183	-0.267648	0.78897	NA
AC007610.2	0	NA	NA	NA	NA	NA
AC007610.3	0	NA	NA	NA	NA	NA
AC007610.4	0.234114	-0.812295	3.132	-0.259354	0.795362	NA
AC007611.1	10.7168	1.12116	1.52836	0.733566	0.463213	0.785707
AC007613.1	40.8384	0.470998	0.587853	0.801217	0.423006	0.762562
AC007614.1	3.76782	-2.38833	3.06413	-0.779448	0.435716	NA
AC007614.2	0	NA	NA	NA	NA	NA
AC007618.1	0	NA	NA	NA	NA	NA
AC007619.1	6.89043	-0.9891	2.27727	-0.434335	0.664045	NA
AC007619.2	0	NA	NA	NA	NA	NA
AC007620.1	0	NA	NA	NA	NA	NA
AC007620.2	0	NA	NA	NA	NA	NA
AC007620.3	4.18439	1.58204	3.08238	0.513253	0.607774	NA
AC007621.1	0.4237	-1.87242	3.12114	-0.599917	0.548562	NA
AC007622.1	0	NA	NA	NA	NA	NA
AC007622.2	44.0708	1.15024	0.688049	1.67174	0.0945755	0.386671
AC007631.1	0	NA	NA	NA	NA	NA
AC007637.1	10.1453	-2.3983	1.37899	-1.73917	0.0820049	0.357938
AC007638.1	1.2829	-1.17177	3.10744	-0.377085	0.706111	NA
AC007638.2	0.112633	0.360435	3.15767	0.114146	0.909122	NA
AC007639.1	0.150242	0.561815	3.14458	0.178662	0.858203	NA
AC007652.1	0	NA	NA	NA	NA	NA
AC007655.1	0	NA	NA	NA	NA	NA
AC007656.1	0.274153	-1.44714	3.13637	-0.461407	0.644507	NA
AC007656.2	0	NA	NA	NA	NA	NA
AC007663.1	16.1816	0.210876	1.13794	0.185313	0.852983	0.956883
AC007663.2	6.96593	-0.599291	3.04564	-0.19677	0.844008	NA
AC007663.3	6.65859	0.868825	2.63209	0.33009	0.741332	NA
AC007663.4	3.73375	-1.19116	2.81695	-0.422854	0.672402	NA
AC007666.1	0.570111	0.387355	3.11177	0.124481	0.900935	NA
AC007671.1	0	NA	NA	NA	NA	NA
AC007673.1	0.450531	0.595756	3.12154	0.190853	0.848641	NA
AC007677.1	0	NA	NA	NA	NA	NA
AC007679.1	0.517776	0.78122	3.11658	0.250666	0.802073	NA
AC007679.2	0	NA	NA	NA	NA	NA
AC007681.1	2.72012	-2.08073	3.08263	-0.674986	0.499685	NA
AC007683.1	90.8394	0.540576	0.465616	1.16099	0.245645	0.608005
AC007683.2	2.42006	-0.412568	3.10302	-0.132957	0.894228	NA
AC007684.1	6.45276	-1.3117	1.71904	-0.763045	0.445437	NA
AC007685.1	9.4515	0.191613	0.958594	0.199889	0.841567	0.953214
AC007686.1	0	NA	NA	NA	NA	NA
AC007686.2	0	NA	NA	NA	NA	NA
AC007686.3	77.9113	0.374303	0.818463	0.457324	0.647438	0.879127
AC007687.1	0	NA	NA	NA	NA	NA
AC007688.1	266.58	0.469534	0.354204	1.3256	0.184972	0.537095
AC007688.2	0	NA	NA	NA	NA	NA
AC007690.1	0.232946	0.373771	3.12899	0.119454	0.904916	NA
AC007718.1	0	NA	NA	NA	NA	NA
AC007728.1	13.0368	0.836315	1.05093	0.795784	0.426158	0.764157
AC007728.2	43.1342	-0.895384	0.695113	-1.28811	0.197707	0.552075
AC007728.3	1.50244	0.298707	3.06219	0.0975468	0.922292	NA
AC007731.1	1.16878	-1.16396	3.05044	-0.381572	0.702779	NA
AC007731.2	19.4449	0.195436	0.972372	0.200989	0.840707	0.952728
AC007731.3	2.10857	-2.77541	3.0531	-0.909046	0.363326	NA
AC007731.4	4.98417	-0.783528	2.75914	-0.283975	0.776429	NA
AC007731.5	0	NA	NA	NA	NA	NA
AC007738.1	0.468227	-0.847963	3.1165	-0.272088	0.785554	NA
AC007741.1	0	NA	NA	NA	NA	NA
AC007742.1	0	NA	NA	NA	NA	NA
AC007742.2	0	NA	NA	NA	NA	NA
AC007743.1	3.00048	-1.2799	3.10348	-0.412407	0.680041	NA
AC007744.1	0	NA	NA	NA	NA	NA
AC007749.1	0	NA	NA	NA	NA	NA
AC007750.1	0	NA	NA	NA	NA	NA
AC007751.1	0	NA	NA	NA	NA	NA
AC007751.2	0	NA	NA	NA	NA	NA
AC007773.1	19.5525	-0.406203	1.12088	-0.362395	0.717057	0.9103
AC007780.1	5.19838	-0.913514	2.2626	-0.403746	0.6864	NA
AC007785.1	0	NA	NA	NA	NA	NA
AC007785.2	0	NA	NA	NA	NA	NA
AC007785.3	0	NA	NA	NA	NA	NA
AC007786.1	6.05851	1.73523	1.63303	1.06259	0.287969	NA
AC007786.2	0	NA	NA	NA	NA	NA
AC007786.3	0	NA	NA	NA	NA	NA
AC007787.1	0.906108	0.805374	3.10959	0.258997	0.795638	NA
AC007787.2	1.91191	2.92564	3.06356	0.95498	0.339588	NA
AC007790.1	4.90309	4.65188	3.03445	1.53302	0.125271	NA
AC007792.1	0	NA	NA	NA	NA	NA
AC007795.1	0	NA	NA	NA	NA	NA
AC007823.1	6.74952	-1.7129	3.0334	-0.564679	0.572292	NA
AC007834.1	0	NA	NA	NA	NA	NA
AC007834.2	0	NA	NA	NA	NA	NA
AC007842.1	0.978524	2.10736	3.08082	0.684026	0.493959	NA
AC007846.1	0	NA	NA	NA	NA	NA
AC007846.2	0	NA	NA	NA	NA	NA
AC007848.1	0	NA	NA	NA	NA	NA
AC007848.2	0	NA	NA	NA	NA	NA
AC007849.1	1.97951	0.521359	3.10308	0.168013	0.866573	NA
AC007849.2	31.3657	-0.506087	0.594671	-0.851038	0.394748	0.74383
AC007861.1	0	NA	NA	NA	NA	NA
AC007861.2	0	NA	NA	NA	NA	NA
AC007876.1	0	NA	NA	NA	NA	NA
AC007878.1	32.1307	1.90965	1.16067	1.6453	0.099907	0.397324
AC007879.1	0	NA	NA	NA	NA	NA
AC007879.2	0	NA	NA	NA	NA	NA
AC007879.3	1.22947	-1.60594	3.05721	-0.525296	0.599377	NA
AC007879.4	0	NA	NA	NA	NA	NA
AC007881.1	37.0139	-1.53349	0.872692	-1.75719	0.078885	0.351104
AC007881.2	1.58497	-3.32497	3.08005	-1.07952	0.280357	NA
AC007881.3	16.45	2.19783	1.77892	1.23549	0.216649	0.575485
AC007899.1	5.52408	2.81525	1.8263	1.54151	0.123193	NA
AC007906.1	0.266715	1.09402	3.14104	0.3483	0.727615	NA
AC007906.2	0.859687	-0.489989	3.07417	-0.159389	0.873362	NA
AC007907.1	0	NA	NA	NA	NA	NA
AC007908.1	0	NA	NA	NA	NA	NA
AC007919.1	1.23646	-0.270875	3.0401	-0.0891009	0.929002	NA
AC007919.2	0	NA	NA	NA	NA	NA
AC007920.1	0	NA	NA	NA	NA	NA
AC007920.2	0.468227	-0.847963	3.1165	-0.272088	0.785554	NA
AC007922.1	1.71295	-2.20428	3.08044	-0.715572	0.474255	NA
AC007922.2	1.29343	1.01177	3.09298	0.327118	0.743578	NA
AC007922.3	0	NA	NA	NA	NA	NA
AC007923.1	0	NA	NA	NA	NA	NA
AC007923.2	0	NA	NA	NA	NA	NA
AC007923.3	0	NA	NA	NA	NA	NA
AC007923.4	0	NA	NA	NA	NA	NA
AC007938.1	0	NA	NA	NA	NA	NA
AC007938.2	0.262875	1.05575	3.13611	0.336643	0.736386	NA
AC007938.3	1.35941	-0.98963	3.07304	-0.322036	0.747425	NA
AC007948.1	0	NA	NA	NA	NA	NA
AC007950.1	0	NA	NA	NA	NA	NA
AC007950.2	4.54515	-4.90246	2.89514	-1.69334	0.0903905	NA
AC007952.1	0	NA	NA	NA	NA	NA
AC007952.2	2.51509	0.125902	2.79812	0.0449953	0.964111	NA
AC007952.3	0.112633	0.360435	3.15767	0.114146	0.909122	NA
AC007952.4	207.669	1.41937	0.534919	2.65343	0.0079679	0.0868999
AC007952.5	0	NA	NA	NA	NA	NA
AC007952.6	0.450727	0.81565	3.12541	0.260974	0.794113	NA
AC007952.7	0.064722	0.329317	3.1536	0.104426	0.916831	NA
AC007952.8	0	NA	NA	NA	NA	NA
AC007952.9	0	NA	NA	NA	NA	NA
AC007953.1	1.4914	1.87918	3.08581	0.608975	0.542541	NA
AC007953.2	2.5948	-1.21269	3.03232	-0.399921	0.689215	NA
AC007954.1	1.65267	0.880372	3.10728	0.283326	0.776927	NA
AC007956.1	1.31607	-2.32734	3.09272	-0.752521	0.451738	NA
AC007966.1	0.553997	-0.166116	3.11101	-0.0533963	0.957416	NA
AC007967.1	0	NA	NA	NA	NA	NA
AC007967.2	0	NA	NA	NA	NA	NA
AC007967.3	0	NA	NA	NA	NA	NA
AC007967.4	0	NA	NA	NA	NA	NA
AC007969.1	1369.26	0.102484	0.332292	0.308416	0.757766	0.927275
AC007969.2	0.300485	0.780115	3.1361	0.248753	0.803552	NA
AC007991.1	0	NA	NA	NA	NA	NA
AC007991.2	1.64111	-0.807296	3.10573	-0.259938	0.794912	NA
AC007991.3	0	NA	NA	NA	NA	NA
AC007991.4	0	NA	NA	NA	NA	NA
AC007992.1	0	NA	NA	NA	NA	NA
AC007992.2	0	NA	NA	NA	NA	NA
AC007993.1	0	NA	NA	NA	NA	NA
AC007993.2	0.788429	0.621575	3.11254	0.1997	0.841715	NA
AC007993.3	14.3855	-0.989963	1.53114	-0.646553	0.517921	0.814612
AC007996.1	8.87664	0.538781	2.09	0.25779	0.796569	0.937178
AC007998.1	0	NA	NA	NA	NA	NA
AC007998.2	0	NA	NA	NA	NA	NA
AC007998.3	7.27123	-0.44239	1.54738	-0.285896	0.774958	NA
AC007998.4	0	NA	NA	NA	NA	NA
AC007998.5	0.984665	-0.798502	3.10985	-0.256765	0.79736	NA
AC008011.1	0	NA	NA	NA	NA	NA
AC008011.2	0	NA	NA	NA	NA	NA
AC008013.1	0.583815	1.94398	3.11255	0.624563	0.532258	NA
AC008013.2	2.29755	-0.811151	3.10393	-0.26133	0.793838	NA
AC008013.3	0.885769	0.238299	3.07872	0.0774017	0.938304	NA
AC008014.1	135.913	-0.333902	0.406445	-0.821519	0.411351	0.756705
AC008015.1	0.328222	-0.758103	3.12922	-0.242266	0.808574	NA
AC008026.1	66.0443	0.43556	0.522661	0.833352	0.404646	0.751279
AC008026.2	0	NA	NA	NA	NA	NA
AC008026.3	11.658	0.936259	1.24093	0.754482	0.45056	0.777902
AC008033.1	3.38627	-0.381733	1.77627	-0.214907	0.82984	NA
AC008033.2	0.606793	-0.361702	3.09298	-0.116943	0.906905	NA
AC008033.3	3.52866	-1.75191	3.08873	-0.567194	0.570582	NA
AC008035.1	62.7482	-0.136394	0.452387	-0.301498	0.763035	0.929235
AC008038.1	1539.33	0.423295	0.369729	1.14488	0.25226	0.616184
AC008040.1	3.85414	-1.24462	2.48393	-0.501071	0.616321	NA
AC008040.2	0	NA	NA	NA	NA	NA
AC008040.3	0.150242	0.561815	3.14458	0.178662	0.858203	NA
AC008040.4	0	NA	NA	NA	NA	NA
AC008040.5	0	NA	NA	NA	NA	NA
AC008050.1	0.246447	-0.944295	3.1424	-0.300501	0.763795	NA
AC008055.1	3.16821	0.0055899	2.38157	0.00234715	0.998127	NA
AC008056.1	0	NA	NA	NA	NA	NA
AC008056.2	0	NA	NA	NA	NA	NA
AC008060.1	5.38461	-0.885195	3.10093	-0.285461	0.775291	NA
AC008060.2	0	NA	NA	NA	NA	NA
AC008060.3	0	NA	NA	NA	NA	NA
AC008060.4	4.21404	-0.884139	3.10137	-0.285081	0.775582	NA
AC008063.1	0.388332	0.764077	3.12168	0.244764	0.806639	NA
AC008063.2	0	NA	NA	NA	NA	NA
AC008065.1	1.94692	2.27279	2.65896	0.854767	0.39268	NA
AC008066.1	0.15093	-0.96098	3.14559	-0.305501	0.759985	NA
AC008067.1	0	NA	NA	NA	NA	NA
AC008069.1	0	NA	NA	NA	NA	NA
AC008072.1	0	NA	NA	NA	NA	NA
AC008073.1	3.92457	0.581265	3.0406	0.191168	0.848394	NA
AC008073.2	0	NA	NA	NA	NA	NA
AC008073.3	0.737699	-0.725921	3.08962	-0.234955	0.814244	NA
AC008074.1	1.84476	0.0162831	3.09368	0.00526335	0.9958	NA
AC008074.2	0	NA	NA	NA	NA	NA
AC008074.3	110.294	-0.337775	0.424868	-0.795012	0.426607	0.76423
AC008079.1	2.035	0.392298	3.04035	0.129031	0.897334	NA
AC008079.2	13.5367	-2.3566	1.81634	-1.29745	0.194478	0.549208
AC008080.1	0	NA	NA	NA	NA	NA
AC008080.2	0	NA	NA	NA	NA	NA
AC008080.3	0	NA	NA	NA	NA	NA
AC008080.4	0.468227	-0.847963	3.1165	-0.272088	0.785554	NA
AC008083.1	0	NA	NA	NA	NA	NA
AC008083.2	2.84506	-2.15094	3.07168	-0.700249	0.483772	NA
AC008083.3	1.05351	-0.869997	3.10721	-0.279993	0.779483	NA
AC008088.1	0	NA	NA	NA	NA	NA
AC008103.1	0	NA	NA	NA	NA	NA
AC008105.1	11.2934	3.20587	1.94872	1.64512	0.0999451	0.397324
AC008105.2	9.98396	-1.1623	1.58537	-0.733143	0.463471	0.785707
AC008105.3	720.997	1.74867	0.593145	2.94814	0.00319695	0.0464686
AC008109.1	2.31819	-1.78462	3.08577	-0.57834	0.563035	NA
AC008114.1	0	NA	NA	NA	NA	NA
AC008115.1	8.65735	1.95015	1.50454	1.29617	0.194917	NA
AC008115.2	0	NA	NA	NA	NA	NA
AC008115.3	13.9427	-1.39896	1.10116	-1.27044	0.203928	0.558939
AC008115.4	0.15093	-0.96098	3.14559	-0.305501	0.759985	NA
AC008121.1	0	NA	NA	NA	NA	NA
AC008121.2	0.656443	-0.787872	3.11488	-0.252938	0.800316	NA
AC008121.3	0.375606	0.800744	3.12983	0.255843	0.798072	NA
AC008124.1	3492.74	0.533934	0.438569	1.21745	0.223434	0.582796
AC008125.1	0	NA	NA	NA	NA	NA
AC008126.1	11.3114	0.360098	0.831419	0.433113	0.664933	0.885435
AC008127.1	0	NA	NA	NA	NA	NA
AC008127.2	0	NA	NA	NA	NA	NA
AC008132.1	0.197951	0.44923	3.13297	0.143388	0.885984	NA
AC008132.2	0	NA	NA	NA	NA	NA
AC008133.1	0	NA	NA	NA	NA	NA
AC008133.2	0	NA	NA	NA	NA	NA
AC008134.1	0	NA	NA	NA	NA	NA
AC008147.1	0	NA	NA	NA	NA	NA
AC008147.2	1.28177	-0.460226	3.07672	-0.149583	0.881093	NA
[truncated: 54,858 more rows]
