# Supplementary material for: Molecular profiling of pre- and post- 5-azacytidine myelodysplastic syndrome samples identifies predictors of response
Source: Front Oncol. 2024 Sep 23;14:1438052. doi: 10.3389/fonc.2024.1438052 (PMC11456566; doi:10.3389/fonc.2024.1438052)
Supplement: Supplementary Table 7 — List of genes differentially expressed between pre- and post-treatment blast non-responders (BL-NR). [file Table7.xlsx]

## Sheet: Sheet1
Supplementary Table 7. List of genes differentially expressed between pre and post-treatment blast non-responders
Gene Symbol	baseMean	log2FoldChange_BL-NR_pre_vs_post	lfcSE	stat	pvalue	padj
2023-12-01	0.310679	-0.252239	3.0637	-0.0823313	0.934383	NA
2023-03-01	1745.46	-0.144747	0.538002	-0.269045	0.787895	0.957578
2023-09-01	704.704	-0.264654	0.581546	-0.455086	0.649047	0.919518
2023-03-10	3.38354	-2.63139	2.262	-1.1633	0.244708	NA
2023-09-10	379.708	0.764364	0.880005	0.86859	0.385071	0.815227
2023-03-11	0.40193	-0.211647	3.05807	-0.0692095	0.944823	NA
2023-09-11	5296.46	-0.470659	0.295482	-1.59285	0.111193	0.587445
2023-09-12	1.75829	-0.929054	3.04621	-0.304987	0.760376	NA
2023-09-14	0.0502413	-0.140068	3.08437	-0.0454121	0.963779	NA
2023-03-02	2565.8	0.15531	0.349432	0.444464	0.656707	0.92262
2023-09-02	13842.8	0.0140892	0.333116	0.0422952	0.966263	0.995084
2023-03-03	375.997	-0.424439	0.615003	-0.69014	0.490106	0.862575
2023-09-03	4.63456	1.84077	2.96204	0.621455	0.5343	NA
2023-03-04	5.73855	-0.415782	3.01082	-0.138096	0.890164	NA
2023-09-04	262.831	-1.21267	0.841356	-1.44133	0.149491	0.641405
2023-03-05	4643.91	0.304765	0.19119	1.59404	0.110928	0.587182
2023-09-05	37.3994	-1.62435	0.642501	-2.52817	0.011466	0.313957
2023-03-06	7152.45	0.235528	0.228884	1.02903	0.303466	0.771899
2023-09-06	23821.1	-0.098822	0.324715	-0.304335	0.760873	0.951799
2023-03-07	11669.9	0.236029	0.21911	1.07722	0.281382	0.756438
2023-09-07	19012.3	0.175507	0.228615	0.767695	0.442668	0.843558
2023-03-08	1612.65	-0.180558	0.285861	-0.631629	0.527629	0.87667
2023-09-08	192.543	-1.17213	0.591494	-1.98165	0.0475186	0.45466
2023-03-09	141.369	0.39818	0.34552	1.15241	0.249154	0.732812
2023-09-09	9537.53	0.090951	0.332029	0.273925	0.784142	0.95748
A1BG	36.1189	-1.6402	1.56533	-1.04783	0.294717	0.766175
A1BG-AS1	101.237	-0.52621	0.4485	-1.17327	0.240689	0.726031
A1CF	0.347977	0.753968	3.0627	0.246178	0.805545	NA
A2M	5379.43	-0.829992	0.636863	-1.30325	0.192489	0.683789
A2M-AS1	60.0158	-0.5242	0.860861	-0.608926	0.542574	0.882658
A2ML1	12.5282	1.04158	1.08006	0.964374	0.334858	0.791017
A2ML1-AS1	0	NA	NA	NA	NA	NA
A2ML1-AS2	0.506083	1.16577	3.04011	0.383462	0.701377	NA
A2MP1	8.14573	-2.82129	2.04567	-1.37915	0.167848	NA
A3GALT2	4.21213	-0.137361	2.47322	-0.0555391	0.955709	NA
A4GALT	529.041	-0.606037	0.843989	-0.718063	0.472718	0.855998
A4GNT	0	NA	NA	NA	NA	NA
AAAS	2718.3	-0.641663	0.374573	-1.71305	0.0867031	0.549305
AACS	1038.28	-0.447207	0.303459	-1.4737	0.140562	0.628283
AACSP1	0.0502413	-0.140068	3.08437	-0.0454121	0.963779	NA
AADAC	1.87701	1.4524	3.03831	0.478029	0.632629	NA
AADACL2	0	NA	NA	NA	NA	NA
AADACL2-AS1	0	NA	NA	NA	NA	NA
AADACL3	0	NA	NA	NA	NA	NA
AADACL4	0	NA	NA	NA	NA	NA
AADACP1	5.54145	-2.11652	2.48275	-0.852488	0.393943	NA
AADAT	344.241	0.0661764	0.416527	0.158877	0.873766	0.977149
AAED1	6202.45	0.681643	0.40759	1.67237	0.0944507	0.562889
AAGAB	2951.35	0.0396529	0.20523	0.193212	0.846793	0.970135
AAK1	712.282	-0.20614	0.453242	-0.454812	0.649244	0.919518
AAMDC	133.559	0.324549	0.396403	0.818735	0.412938	0.827854
AAMP	6576.19	-0.311293	0.265549	-1.17226	0.241091	0.726574
AANAT	8.90873	0.304014	1.1108	0.273688	0.784324	NA
AAR2	4445.27	-0.325288	0.240268	-1.35386	0.175782	0.668977
AARD	12.299	0.180499	1.35576	0.133134	0.894087	0.981839
AARS	3266.87	-0.807133	0.369803	-2.1826	0.0290651	0.395606
AARS2	873.693	-0.472434	0.315811	-1.49594	0.134669	0.621215
AARSD1	34.0601	0.189152	0.654754	0.28889	0.772666	0.954909
AARSP1	0	NA	NA	NA	NA	NA
AASDH	599.922	0.221232	0.387072	0.571553	0.567625	0.890799
AASDHPPT	3150.49	-0.0851275	0.292113	-0.29142	0.77073	0.953982
AASS	309.977	-1.27157	0.604936	-2.102	0.0355534	0.414688
AATBC	65.4738	0.215256	1.13559	0.189554	0.849659	0.970897
AATF	4697.18	-0.184192	0.18847	-0.977298	0.328422	0.786502
AATK	560.453	0.045888	0.327813	0.139982	0.888674	0.98001
AB015752.1	3.10314	-0.620391	2.83126	-0.219122	0.826555	NA
ABALON	111.443	0.364063	0.415802	0.875569	0.381264	0.813658
ABAT	179.984	-0.0968534	0.384735	-0.251741	0.801241	0.961468
ABBA01000935.2	9.86584	-0.490051	0.791484	-0.619154	0.535815	NA
ABBA01006766.1	0	NA	NA	NA	NA	NA
ABCA1	2360.26	0.514473	0.472374	1.08912	0.2761	0.752021
ABCA10	5.45773	-0.351782	2.90171	-0.121232	0.903507	NA
ABCA11P	9.20034	-1.4808	1.16215	-1.2742	0.202594	NA
ABCA12	4.19951	1.95696	1.64387	1.19046	0.233865	NA
ABCA13	704.537	-0.242459	0.638892	-0.379499	0.704317	0.938784
ABCA17P	21.3502	-0.111644	0.959443	-0.116364	0.907364	0.984099
ABCA2	1691.51	-0.495119	0.397116	-1.24679	0.212476	0.700749
ABCA3	338.064	-1.12248	0.795188	-1.41159	0.158072	0.651638
ABCA4	12.2081	1.48947	1.79665	0.829029	0.407088	0.824827
ABCA5	374.894	-0.0410147	0.433966	-0.0945113	0.924703	0.988004
ABCA6	120.695	-1.92	0.880637	-2.18025	0.0292393	0.395836
ABCA7	1081.24	-1.05415	0.372209	-2.83216	0.00462353	0.212005
ABCA8	128.012	-1.42226	1.82893	-0.777644	0.436779	0.840328
ABCA9	66.7497	-0.392652	2.40682	-0.163141	0.870407	0.976798
ABCA9-AS1	6.09443	0.152015	2.77614	0.0547577	0.956332	NA
ABCB1	1606.09	0.139907	0.394168	0.354941	0.722634	0.9435
ABCB10	4251.54	-0.714155	0.322597	-2.21377	0.0268447	0.390684
ABCB10P1	14.8601	-0.904109	0.987299	-0.915741	0.359803	0.803747
ABCB10P3	7.21184	-1.94365	1.35784	-1.43142	0.15231	NA
ABCB10P4	6.27816	-2.565	1.12661	-2.27675	0.0228013	NA
ABCB11	3.59539	-1.85516	2.99018	-0.620417	0.534983	NA
ABCB4	34.1599	0.745141	0.734052	1.01511	0.310056	0.775728
ABCB5	1.2793	0.25368	3.0396	0.0834586	0.933487	NA
ABCB6	17.5993	-1.12847	0.685904	-1.64523	0.0999221	0.572074
ABCB7	1294.98	0.133571	0.289687	0.461087	0.644736	0.917328
ABCB8	975.603	-0.495756	0.31482	-1.57473	0.115319	0.592011
ABCB9	316.409	0.201445	0.496131	0.406032	0.684719	0.933083
ABCC1	4824.6	-0.0852703	0.36047	-0.236553	0.813004	0.963844
ABCC10	625.724	-0.0626309	0.431717	-0.145074	0.884653	0.979244
ABCC11	8.4783	-0.0194328	1.17761	-0.0165019	0.986834	NA
ABCC12	1.68695	0.303697	3.02816	0.100291	0.920113	NA
ABCC13	10.1749	-1.57079	1.05099	-1.49458	0.135025	NA
ABCC2	28.6832	1.00774	1.40059	0.719512	0.471826	0.855356
ABCC3	450.012	-1.8772	0.875467	-2.14423	0.0320146	0.404054
ABCC4	1606.31	-0.556291	0.49116	-1.13261	0.257379	0.738816
ABCC5	1117.73	-0.692096	0.401279	-1.72473	0.0845768	0.544953
ABCC5-AS1	0	NA	NA	NA	NA	NA
ABCC6	178.573	-0.655098	0.443965	-1.47556	0.140062	0.627464
ABCC6P1	29.7951	-0.272841	1.00432	-0.271668	0.785877	0.957578
ABCC6P2	13.8399	-0.344244	1.90088	-0.181097	0.856292	0.972774
ABCC8	26.6752	-0.842412	1.98542	-0.424298	0.671348	0.927758
ABCC9	61.6059	-2.64589	1.25732	-2.10439	0.035344	0.414212
ABCD1	753.838	-0.290928	0.492816	-0.590338	0.554964	0.886884
ABCD1P2	0	NA	NA	NA	NA	NA
ABCD1P3	0	NA	NA	NA	NA	NA
ABCD1P4	0.15534	-0.229187	3.07284	-0.0745848	0.940545	NA
ABCD1P5	0.100483	-0.183074	3.07053	-0.0596229	0.952456	NA
ABCD2	17.2206	-0.268402	2.61816	-0.102515	0.918348	0.986197
ABCD3	2189.18	-0.3297	0.303079	-1.08783	0.276669	0.752595
ABCD4	1983.15	-0.137353	0.283365	-0.48472	0.627875	0.910666
ABCE1	7677.86	-0.25622	0.319953	-0.800806	0.423244	0.83342
ABCF1	3829.02	-0.419157	0.28749	-1.45799	0.144843	0.635284
ABCF2	486.485	-0.492115	0.251672	-1.95538	0.0505381	0.463639
ABCF2P1	5.25336	-0.82614	0.985857	-0.837992	0.402035	NA
ABCF2P2	0.913262	-0.920778	3.04901	-0.301993	0.762658	NA
ABCF3	3480.08	-0.122713	0.265114	-0.462868	0.643459	0.917106
ABCG1	4256.12	0.1087	0.307912	0.353023	0.724071	0.943638
ABCG2	306.805	0.1987	0.624792	0.318025	0.750466	0.949277
ABCG4	6.30949	-1.77062	3.01953	-0.586388	0.557615	NA
ABCG5	1.50404	-0.250675	3.02823	-0.0827796	0.934027	NA
ABCG8	4.52719	-0.29261	2.98094	-0.0981603	0.921805	NA
ABHD1	94.0097	0.459282	0.37715	1.21777	0.223311	0.709524
ABHD10	2826.46	-0.178811	0.327829	-0.545439	0.585451	0.897118
ABHD11	559.376	-0.0998578	0.290914	-0.343256	0.731406	0.944975
ABHD11-AS1	6.33245	0.695252	2.88897	0.240657	0.809821	NA
ABHD12	4863.59	0.2098	0.338299	0.620161	0.535152	0.879724
ABHD12B	632.722	-0.811154	0.686499	-1.18158	0.237373	0.721332
ABHD13	3118.44	0.720719	0.344981	2.08916	0.0366936	0.416925
ABHD14A	365.312	-0.389743	0.310901	-1.25359	0.20999	0.699793
ABHD14A-ACY1	0.537278	0.406657	3.02801	0.134299	0.893166	NA
ABHD14B	4852.88	0.0802347	0.261455	0.306878	0.758936	0.951291
ABHD15	1085.01	0.0772385	0.348539	0.221607	0.82462	0.966438
ABHD15-AS1	1.7395	2.60837	3.01932	0.863893	0.387647	NA
ABHD16A	61.4807	0.585073	0.38674	1.51283	0.130322	0.613899
ABHD16B	0	NA	NA	NA	NA	NA
ABHD17A	5422.11	-0.154862	0.238327	-0.649785	0.515831	0.872597
ABHD17AP1	176.101	-0.217907	0.271733	-0.801916	0.422602	0.833044
ABHD17AP3	54.7213	0.0701232	0.342588	0.204687	0.837817	0.968526
ABHD17AP4	36.1169	-0.249277	0.539343	-0.462186	0.643948	0.917327
ABHD17AP5	276.476	-0.17122	0.372605	-0.459522	0.645859	0.918071
ABHD17AP6	227.265	-0.115195	0.355486	-0.324051	0.7459	0.948497
ABHD17AP7	0	NA	NA	NA	NA	NA
ABHD17AP8	0	NA	NA	NA	NA	NA
ABHD17AP9	0	NA	NA	NA	NA	NA
ABHD17B	5966.85	0.0570264	0.323953	0.176033	0.860268	0.97342
ABHD17C	8853.46	0.496165	0.534689	0.92795	0.353433	0.800062
ABHD18	822.04	0.0141227	0.21223	0.0665445	0.946944	0.991203
ABHD2	3374.33	0.151253	0.38545	0.392407	0.694758	0.935082
ABHD3	1287.11	-0.0228665	0.162493	-0.140723	0.888089	0.979916
ABHD4	2161.36	0.0258345	0.327034	0.0789964	0.937036	0.990147
ABHD5	1642.57	0.107294	0.222529	0.482155	0.629696	0.911521
ABHD6	450.834	0.61489	0.703603	0.873917	0.382163	0.814055
ABHD8	804.119	-0.096983	0.253303	-0.382873	0.701814	0.938102
ABI1	12770.8	0.304959	0.201137	1.51618	0.129475	0.612126
ABI1P1	0	NA	NA	NA	NA	NA
ABI2	1951.48	-0.052752	0.338935	-0.155641	0.876316	0.977344
ABI3	556.447	-1.15763	0.679508	-1.70363	0.088451	0.55323
ABI3BP	193.404	-0.380995	0.731266	-0.521007	0.602362	0.902159
ABL1	2958.79	-0.053895	0.264104	-0.204068	0.838301	0.968535
ABL2	668.951	0.195774	0.346883	0.56438	0.572496	0.89152
ABLIM1	3058.93	-0.750153	0.509205	-1.47319	0.140701	0.628406
ABLIM2	48.7542	-0.314146	0.940029	-0.334188	0.738238	0.94691
ABLIM3	222.257	-2.32145	0.906588	-2.56064	0.0104479	0.299254
ABO	1943.55	-0.219129	0.412415	-0.531331	0.595189	0.899281
ABR	2762.96	0.160774	0.368012	0.436871	0.662205	0.924434
ABRA	4.29807	0.531521	3.02774	0.17555	0.860647	NA
ABRACL	4775.2	0.300735	0.287734	1.04518	0.295938	0.767468
ABRAXAS1	476.205	0.279477	0.292407	0.95578	0.339183	0.793576
ABRAXAS2	2075.03	-0.0165609	0.261713	-0.0632788	0.949545	0.991487
ABT1	6358.89	0.20793	0.249423	0.833642	0.404483	0.82421
ABT1P1	0	NA	NA	NA	NA	NA
ABTB1	3306.05	-0.429133	0.238217	-1.80144	0.0716343	0.513188
ABTB2	222.608	-0.991427	0.660577	-1.50085	0.133394	0.61798
AC000032.1	0.758311	-0.401474	3.03327	-0.132357	0.894702	NA
AC000035.1	0	NA	NA	NA	NA	NA
AC000036.1	0.691663	0.321639	3.03738	0.105893	0.915667	NA
AC000041.1	0	NA	NA	NA	NA	NA
AC000041.2	0	NA	NA	NA	NA	NA
AC000058.1	0.351689	-0.210187	3.0587	-0.0687177	0.945214	NA
AC000061.1	0	NA	NA	NA	NA	NA
AC000067.1	0	NA	NA	NA	NA	NA
AC000068.1	39.5567	-1.11147	0.843996	-1.31691	0.187867	0.680627
AC000068.2	1.47077	-1.26146	3.01687	-0.418137	0.675847	NA
AC000068.3	0	NA	NA	NA	NA	NA
AC000077.1	0	NA	NA	NA	NA	NA
AC000078.1	2.39767	0.521712	3.03848	0.171701	0.863672	NA
AC000081.1	0	NA	NA	NA	NA	NA
AC000089.1	234.875	0.444664	0.36415	1.2211	0.222048	0.707911
AC000093.1	1.12371	1.4085	3.0495	0.461879	0.644168	NA
AC000095.1	0	NA	NA	NA	NA	NA
AC000095.2	1.71418	1.59968	3.04433	0.525462	0.599262	NA
AC000099.1	0.0648016	-0.135173	3.08401	-0.0438304	0.96504	NA
AC000111.1	0	NA	NA	NA	NA	NA
AC000111.2	0	NA	NA	NA	NA	NA
AC000120.1	1.62477	0.248364	3.01133	0.0824766	0.934268	NA
AC000123.1	3.07963	-0.727674	2.98543	-0.243742	0.807431	NA
AC000123.2	0.994607	0.335046	3.01151	0.111255	0.911414	NA
AC000123.3	28.156	-0.159178	0.566548	-0.280962	0.77874	0.956248
AC000124.1	0	NA	NA	NA	NA	NA
AC000362.1	0	NA	NA	NA	NA	NA
AC000367.1	0	NA	NA	NA	NA	NA
AC000372.1	0	NA	NA	NA	NA	NA
AC000374.1	0	NA	NA	NA	NA	NA
AC000403.1	1.28717	-0.0921357	3.05564	-0.0301526	0.975945	NA
AC001226.1	2.85916	0.452633	1.88972	0.239524	0.810699	NA
AC001226.2	25.9662	-1.42613	0.881987	-1.61695	0.105889	0.580549
AC002044.1	0.225188	0.860269	3.06621	0.280564	0.779045	NA
AC002044.2	4.78202	0.0580354	2.58805	0.0224244	0.982109	NA
AC002044.3	0.452016	0.11646	3.05918	0.0380691	0.969633	NA
AC002056.1	104.715	0.0467336	0.356031	0.131263	0.895567	0.982373
AC002056.2	0.392602	-0.437112	3.05751	-0.142963	0.886319	NA
AC002059.1	1.36384	0.768468	3.01195	0.25514	0.798615	NA
AC002064.1	1.16643	-0.197109	3.0555	-0.0645097	0.948564	NA
AC002064.2	1.37191	1.37178	3.02232	0.453885	0.649912	NA
AC002064.3	6.77851	1.98593	1.78625	1.11179	0.26623	NA
AC002066.1	0.455536	-0.215269	3.05964	-0.0703579	0.943909	NA
AC002069.1	0	NA	NA	NA	NA	NA
AC002069.2	0.777619	-0.194985	3.05644	-0.0637948	0.949134	NA
AC002070.1	17.9639	-0.409201	1.09164	-0.374849	0.707773	0.940063
AC002074.1	0.896744	-1.72228	3.04321	-0.565942	0.571433	NA
AC002075.1	0.311111	0.769813	3.0631	0.251318	0.801568	NA
AC002075.2	78.1908	0.443687	0.357641	1.2406	0.214755	0.702234
AC002076.1	0	NA	NA	NA	NA	NA
AC002076.2	0	NA	NA	NA	NA	NA
AC002090.1	0.194405	-0.176843	3.06465	-0.0577042	0.953984	NA
AC002091.1	55.2233	0.544171	0.460153	1.18259	0.236973	0.721282
AC002091.2	50.1714	-0.426802	0.588928	-0.72471	0.46863	0.853842
AC002094.1	0	NA	NA	NA	NA	NA
AC002094.2	0	NA	NA	NA	NA	NA
AC002094.3	0	NA	NA	NA	NA	NA
AC002094.4	14.7201	-0.280444	1.07395	-0.261133	0.79399	0.959481
AC002094.5	11.2287	-1.48769	1.49704	-0.993758	0.320341	0.780535
AC002101.1	0.0502413	-0.140068	3.08437	-0.0454121	0.963779	NA
AC002115.1	0	NA	NA	NA	NA	NA
AC002116.1	0	NA	NA	NA	NA	NA
AC002116.2	12.8548	-0.923927	0.756904	-1.22067	0.222213	0.708018
AC002127.1	0.0759227	-0.138261	3.08423	-0.0448285	0.964244	NA
AC002127.2	1.58935	0.259338	3.01504	0.086015	0.931454	NA
AC002128.1	34.3333	1.19809	0.621534	1.92763	0.0539006	0.471314
AC002128.2	0.626301	0.33833	3.03777	0.111375	0.911319	NA
AC002306.1	6.65095	1.28764	1.68466	0.764333	0.444669	NA
AC002310.1	101.686	-0.319704	0.67553	-0.473264	0.636025	0.912878
AC002310.2	1.19462	-1.83568	2.73405	-0.671414	0.501957	NA
AC002310.3	20.8058	-0.116319	0.524267	-0.221869	0.824416	0.966438
AC002310.4	0	NA	NA	NA	NA	NA
AC002310.5	0	NA	NA	NA	NA	NA
AC002310.6	28.0111	-1.28274	0.577359	-2.22173	0.0263013	0.390195
AC002347.1	1.82115	-1.7477	2.38239	-0.73359	0.463199	NA
AC002347.2	0.811756	0.29205	3.0212	0.0966668	0.922991	NA
AC002350.1	103.026	0.0793732	0.422825	0.187721	0.851095	0.971455
AC002351.1	0.509453	-0.821435	3.05309	-0.269051	0.787891	NA
AC002366.1	0.89373	-0.835554	3.04977	-0.273973	0.784105	NA
AC002367.1	46.327	0.469236	0.333069	1.40883	0.158887	0.653446
AC002368.1	2.05288	-0.0414219	3.02332	-0.0137008	0.989069	NA
AC002375.1	0	NA	NA	NA	NA	NA
AC002378.1	0.129603	-0.16561	3.06981	-0.053948	0.956977	NA
AC002381.1	1.8583	-0.460282	3.00247	-0.153301	0.878161	NA
AC002383.1	0	NA	NA	NA	NA	NA
AC002384.1	0.0603219	-0.117244	3.0825	-0.0380352	0.96966	NA
AC002386.1	0	NA	NA	NA	NA	NA
AC002398.1	0.875351	0.387925	3.0167	0.128593	0.89768	NA
AC002398.2	0	NA	NA	NA	NA	NA
AC002400.1	3.80005	0.696876	3.05459	0.22814	0.819537	NA
AC002401.1	0	NA	NA	NA	NA	NA
AC002401.2	0.759227	-0.220936	3.05725	-0.0722661	0.94239	NA
AC002401.3	3.31846	0.249056	3.00419	0.0829029	0.933929	NA
AC002401.4	0	NA	NA	NA	NA	NA
AC002407.1	2.07446	0.136765	3.0212	0.0452686	0.963893	NA
AC002428.1	0	NA	NA	NA	NA	NA
AC002428.2	0	NA	NA	NA	NA	NA
AC002429.1	0	NA	NA	NA	NA	NA
AC002429.2	13.9462	-1.63483	2.65519	-0.615712	0.538084	0.881293
AC002451.1	3.87969	1.65501	1.99629	0.829043	0.40708	NA
AC002451.2	0	NA	NA	NA	NA	NA
AC002454.1	648.718	0.00253062	0.644123	0.00392878	0.996865	0.999692
AC002456.1	7.00363	-1.27857	1.06308	-1.2027	0.229092	NA
AC002456.2	0	NA	NA	NA	NA	NA
AC002460.1	0.100483	-0.183074	3.07053	-0.0596229	0.952456	NA
AC002463.1	0	NA	NA	NA	NA	NA
AC002464.1	119.276	-0.327936	0.452486	-0.724743	0.46861	0.853842
AC002465.1	0.173989	0.734293	3.07109	0.239099	0.811029	NA
AC002467.1	51.9585	-0.105318	0.476085	-0.221217	0.824923	0.966438
AC002470.1	14.3263	-0.632523	0.961567	-0.657804	0.510664	0.871097
AC002470.2	0	NA	NA	NA	NA	NA
AC002472.1	0	NA	NA	NA	NA	NA
AC002472.2	0	NA	NA	NA	NA	NA
AC002472.3	0	NA	NA	NA	NA	NA
AC002472.4	0	NA	NA	NA	NA	NA
AC002480.1	0	NA	NA	NA	NA	NA
AC002480.2	1.51493	-0.111169	3.05535	-0.0363851	0.970975	NA
AC002480.3	0.83515	-0.221723	3.05692	-0.0725314	0.942179	NA
AC002480.4	0	NA	NA	NA	NA	NA
AC002486.1	0	NA	NA	NA	NA	NA
AC002486.2	0.103886	1.01088	3.07738	0.328487	0.742544	NA
AC002487.1	0	NA	NA	NA	NA	NA
AC002504.1	0.442138	1.88037	3.06006	0.614488	0.538893	NA
AC002511.1	6.54111	2.029	2.9928	0.677958	0.497798	NA
AC002511.2	5.37387	0.176758	3.02861	0.0583629	0.95346	NA
AC002511.3	0	NA	NA	NA	NA	NA
AC002519.1	0	NA	NA	NA	NA	NA
AC002519.2	1.77112	-0.900441	1.82053	-0.494603	0.62088	NA
AC002524.1	81.2265	0.371688	0.278255	1.33578	0.18162	0.673792
AC002525.1	13.5791	-0.654022	1.67029	-0.391562	0.695382	0.935226
AC002540.1	0	NA	NA	NA	NA	NA
AC002542.1	0.116111	-0.250329	3.07413	-0.0814307	0.935099	NA
AC002543.1	27.5324	0.523758	0.983007	0.532812	0.594164	0.89865
AC002545.1	3.1988	-0.224563	1.70335	-0.131836	0.895114	NA
AC002546.1	3.10947	-0.896833	3.02993	-0.295992	0.767236	NA
AC002550.1	0	NA	NA	NA	NA	NA
AC002550.2	0.979563	0.415062	3.01336	0.137741	0.890445	NA
AC002551.1	2.37644	-2.28045	1.9639	-1.16118	0.245567	NA
AC002553.1	30.6352	0.253166	0.492293	0.514258	0.607071	0.903827
AC002553.2	7.00457	0.0693257	1.24037	0.0558914	0.955428	NA
AC002558.1	49.4612	-1.47475	0.834829	-1.76652	0.077308	0.525814
AC002558.2	14.4753	0.623346	0.607162	1.02666	0.304583	0.772574
AC002558.3	17.5579	0.222151	1.13176	0.196288	0.844385	0.969536
AC002563.1	0	NA	NA	NA	NA	NA
AC002984.1	0.550011	-0.464499	3.04499	-0.152545	0.878757	NA
AC002985.1	0	NA	NA	NA	NA	NA
AC002996.1	0	NA	NA	NA	NA	NA
AC003001.1	0	NA	NA	NA	NA	NA
AC003001.2	0	NA	NA	NA	NA	NA
AC003002.1	0	NA	NA	NA	NA	NA
AC003002.2	0.189925	-0.58852	3.0687	-0.191781	0.847913	NA
AC003002.3	3.76118	0.179882	1.4647	0.122811	0.902256	NA
AC003005.1	0	NA	NA	NA	NA	NA
AC003005.2	4.50036	-1.39699	1.29229	-1.08101	0.279691	NA
AC003006.1	0	NA	NA	NA	NA	NA
AC003009.1	0	NA	NA	NA	NA	NA
AC003035.1	1.56602	1.24686	3.04035	0.410103	0.68173	NA
AC003035.2	1.28435	0.19851	3.03446	0.0654183	0.947841	NA
AC003043.1	0	NA	NA	NA	NA	NA
AC003043.2	1.3742	0.461371	3.04397	0.151568	0.879527	NA
AC003045.1	0	NA	NA	NA	NA	NA
AC003070.1	8.48608	1.51866	0.993299	1.52891	0.126287	NA
AC003070.2	0.405965	0.838022	3.05341	0.274455	0.783735	NA
AC003071.1	0	NA	NA	NA	NA	NA
AC003071.2	0.251207	-0.205582	3.06068	-0.0671689	0.946447	NA
AC003072.1	7.40035	-1.29234	1.02704	-1.25831	0.208278	NA
AC003080.1	0.351689	-0.210187	3.0587	-0.0687177	0.945214	NA
AC003084.1	0	NA	NA	NA	NA	NA
AC003087.1	0	NA	NA	NA	NA	NA
AC003092.1	3.8633	1.12684	3.00975	0.374395	0.708111	NA
AC003092.2	0	NA	NA	NA	NA	NA
AC003098.1	0	NA	NA	NA	NA	NA
AC003101.1	0	NA	NA	NA	NA	NA
AC003101.2	2.6449	-1.74891	3.02689	-0.577792	0.563404	NA
AC003101.3	0	NA	NA	NA	NA	NA
AC003102.1	116.781	0.736851	0.434701	1.69507	0.0900613	0.556678
AC003659.1	0.233333	0.762575	3.06609	0.248713	0.803583	NA
AC003666.1	0.0648016	-0.135173	3.08401	-0.0438304	0.96504	NA
AC003669.1	4.58319	0.308057	0.821987	0.374771	0.707831	NA
AC003681.1	327.174	-0.179466	0.279308	-0.642539	0.520523	0.87453
AC003682.1	2.1676	-1.67403	3.01163	-0.555856	0.578309	NA
AC003684.1	0	NA	NA	NA	NA	NA
AC003685.1	0	NA	NA	NA	NA	NA
AC003685.2	0.100483	-0.183074	3.07053	-0.0596229	0.952456	NA
AC003686.1	0	NA	NA	NA	NA	NA
AC003687.1	0	NA	NA	NA	NA	NA
AC003688.1	0	NA	NA	NA	NA	NA
AC003688.2	0.612912	0.686457	3.05977	0.224349	0.822486	NA
AC003956.1	22.5024	-0.0871868	0.673667	-0.129421	0.897024	0.982592
AC003957.1	5.3727	-0.933338	2.23051	-0.418442	0.675624	NA
AC003958.1	0	NA	NA	NA	NA	NA
AC003958.2	0	NA	NA	NA	NA	NA
AC003965.1	11.1541	-0.103001	1.45044	-0.0710137	0.943387	0.990807
AC003965.2	0	NA	NA	NA	NA	NA
AC003973.1	0	NA	NA	NA	NA	NA
AC003973.2	6.9599	0.203883	3.02985	0.0672914	0.94635	NA
AC003973.3	8.539	-0.277211	2.28997	-0.121055	0.903648	NA
AC003975.1	0	NA	NA	NA	NA	NA
AC003982.1	0	NA	NA	NA	NA	NA
AC003984.1	0	NA	NA	NA	NA	NA
AC003985.1	0	NA	NA	NA	NA	NA
AC003985.2	0	NA	NA	NA	NA	NA
AC003986.1	0.200965	-0.201643	3.06239	-0.0658451	0.947501	NA
AC003986.2	2.76442	-0.423506	3.00295	-0.14103	0.887847	NA
AC003986.3	0.324008	-0.186311	3.06035	-0.060879	0.951456	NA
AC003988.1	0	NA	NA	NA	NA	NA
AC003989.1	0	NA	NA	NA	NA	NA
AC003989.2	0.868161	-1.0811	3.05027	-0.354427	0.723019	NA
AC003991.1	11.615	1.53482	1.0827	1.41759	0.156311	0.650003
AC003991.2	24.0909	0.370342	0.631119	0.586802	0.557337	0.887938
AC003992.1	0	NA	NA	NA	NA	NA
AC004000.1	2.28129	-1.46479	3.00123	-0.488063	0.625505	NA
AC004004.1	0	NA	NA	NA	NA	NA
AC004006.1	0	NA	NA	NA	NA	NA
AC004009.1	0.521966	0.761014	3.05975	0.248718	0.803579	NA
AC004009.2	0	NA	NA	NA	NA	NA
AC004009.3	0	NA	NA	NA	NA	NA
AC004012.1	0.7522	1.55104	3.04302	0.509706	0.610258	NA
AC004014.1	0.245165	0.669005	3.06854	0.218021	0.827413	NA
AC004014.2	2.69681	0.696036	3.05501	0.227835	0.819775	NA
AC004022.1	0	NA	NA	NA	NA	NA
AC004022.2	0	NA	NA	NA	NA	NA
AC004023.1	0.523478	0.86372	3.05811	0.282436	0.777609	NA
AC004024.1	1.51282	-1.61842	2.9949	-0.540394	0.588926	NA
AC004034.1	70.2365	0.479478	0.397611	1.2059	0.227857	0.713345
AC004039.1	2.29934	-0.462481	3.00095	-0.154111	0.877522	NA
AC004052.1	0	NA	NA	NA	NA	NA
AC004053.1	2.50954	-0.459082	2.45833	-0.186745	0.85186	NA
AC004054.1	2.58115	3.38395	3.01839	1.12111	0.262241	NA
AC004057.1	316.412	0.464662	0.404105	1.14986	0.250203	0.733434
AC004062.1	0	NA	NA	NA	NA	NA
AC004063.1	0.406976	-0.330861	3.05423	-0.108329	0.913735	NA
AC004066.1	0.112594	0.829672	3.07712	0.269626	0.787448	NA
AC004066.2	0	NA	NA	NA	NA	NA
AC004067.1	7.3977	-2.66443	2.29118	-1.16291	0.244866	NA
AC004069.1	113.014	0.231665	0.364341	0.635847	0.524876	0.876096
AC004069.2	0	NA	NA	NA	NA	NA
AC004074.1	0	NA	NA	NA	NA	NA
AC004076.1	0.728141	-1.13067	3.03338	-0.372743	0.709339	NA
AC004076.2	20.3986	-1.2993	0.97507	-1.33252	0.18269	0.674078
AC004080.1	0	NA	NA	NA	NA	NA
AC004080.2	0	NA	NA	NA	NA	NA
AC004080.3	0	NA	NA	NA	NA	NA
AC004080.4	24.0108	0.280727	0.993593	0.282538	0.777531	0.956201
AC004080.5	0	NA	NA	NA	NA	NA
AC004080.6	0	NA	NA	NA	NA	NA
AC004112.1	2.27553	-1.409	1.96597	-0.716693	0.473564	NA
AC004129.1	0	NA	NA	NA	NA	NA
AC004129.2	0	NA	NA	NA	NA	NA
AC004130.1	41.8802	0.0506337	0.720971	0.0702299	0.944011	0.991028
AC004134.1	28.2972	-0.485392	0.727232	-0.667452	0.504484	0.868692
AC004147.1	0	NA	NA	NA	NA	NA
AC004147.2	17.1814	1.89693	1.47716	1.28417	0.199081	0.690506
AC004147.3	0	NA	NA	NA	NA	NA
AC004147.4	0.15534	-0.229187	3.07284	-0.0745848	0.940545	NA
AC004147.5	0	NA	NA	NA	NA	NA
AC004148.1	1.74236	-0.196097	3.05514	-0.0641857	0.948822	NA
AC004148.2	62.1925	0.0249565	0.499233	0.0499896	0.960131	0.992606
AC004149.1	0.998135	0.385265	3.05222	0.126224	0.899554	NA
AC004156.1	1.99023	1.75793	3.0204	0.582019	0.560554	NA
AC004158.1	2.90147	0.131656	3.00144	0.0438642	0.965013	NA
AC004160.1	3.6058	-0.750898	2.98044	-0.251942	0.801086	NA
AC004160.2	0.536392	-0.929613	3.04892	-0.304899	0.760443	NA
AC004217.1	0.639511	-0.092889	3.05692	-0.0303865	0.975759	NA
AC004217.2	1.50608	0.33921	3.01395	0.112547	0.91039	NA
AC004221.1	0.500083	-1.10413	3.04105	-0.363075	0.716549	NA
AC004223.1	0.186124	0.770398	3.07297	0.250701	0.802045	NA
AC004223.2	1.5362	1.48603	3.04354	0.488256	0.625368	NA
AC004223.3	0	NA	NA	NA	NA	NA
AC004223.4	1.10233	0.257422	3.02251	0.0851683	0.932128	NA
AC004224.1	1.6624	2.88542	2.6062	1.10714	0.268235	NA
AC004224.2	0	NA	NA	NA	NA	NA
AC004231.1	0	NA	NA	NA	NA	NA
AC004231.3	0	NA	NA	NA	NA	NA
AC004232.1	0	NA	NA	NA	NA	NA
AC004232.2	0	NA	NA	NA	NA	NA
AC004232.3	3.76557	1.6523	3.01312	0.54837	0.583438	NA
AC004233.1	1.10425	-1.28866	3.02625	-0.425828	0.670233	NA
AC004233.2	4.20166	-0.923673	3.00234	-0.307651	0.758348	NA
AC004233.3	32.6799	-0.588597	0.716205	-0.821828	0.411175	0.826649
AC004233.4	13.8164	0.389851	0.817575	0.476838	0.633477	0.912429
AC004241.1	19.4996	1.03226	0.751264	1.37403	0.169431	0.66363
AC004241.2	0.688853	-0.740614	3.05651	-0.242307	0.808542	NA
AC004241.3	78.9169	-0.386024	0.360453	-1.07094	0.284196	0.758429
AC004241.4	0	NA	NA	NA	NA	NA
AC004241.5	6.20794	-0.13774	2.26226	-0.0608862	0.95145	NA
AC004253.1	12.3507	0.125058	0.904402	0.138277	0.890022	0.980235
AC004253.2	0	NA	NA	NA	NA	NA
AC004257.1	0.444976	0.846873	3.06153	0.276618	0.782074	NA
AC004263.1	2.37086	-1.76551	3.00821	-0.586896	0.557274	NA
AC004264.1	1.08406	0.324245	3.03584	0.106806	0.914943	NA
AC004264.2	5.84515	-0.441547	2.30375	-0.191665	0.848005	NA
AC004381.1	2.2762	0.601183	2.46748	0.243643	0.807508	NA
AC004381.2	24.1523	-2.59465	1.39895	-1.85472	0.0636366	0.495901
AC004381.3	1.46842	-0.570778	3.02915	-0.188429	0.850541	NA
AC004383.1	0	NA	NA	NA	NA	NA
AC004386.1	0.303691	-0.208428	3.06254	-0.0680573	0.94574	NA
AC004386.2	0	NA	NA	NA	NA	NA
AC004408.1	0.707763	0.294392	3.03783	0.0969085	0.922799	NA
AC004408.2	2.90368	0.61492	2.60035	0.236476	0.813064	NA
AC004415.1	0.112594	0.829672	3.07712	0.269626	0.787448	NA
AC004448.1	0	NA	NA	NA	NA	NA
AC004448.2	0.479708	0.243026	3.05604	0.0795232	0.936617	NA
AC004448.3	0	NA	NA	NA	NA	NA
AC004449.1	0.40193	-0.211647	3.05807	-0.0692095	0.944823	NA
AC004453.1	1343.83	0.810358	0.350617	2.31124	0.0208198	0.367533
AC004453.2	2.85969	-1.39057	3.04406	-0.456815	0.647804	NA
AC004461.1	7.00138	-2.71223	1.64154	-1.65225	0.0984843	NA
AC004461.2	0	NA	NA	NA	NA	NA
AC004466.1	1.46761	0.0865173	2.9972	0.028866	0.976971	NA
AC004466.2	18.3351	0.121887	0.652922	0.18668	0.851912	0.971455
AC004466.3	1.40893	1.09265	3.01763	0.362087	0.717287	NA
AC004467.1	0	NA	NA	NA	NA	NA
AC004470.1	0.667846	0.156624	3.04913	0.0513666	0.959033	NA
AC004471.1	29.2007	-0.550445	0.623717	-0.882524	0.377494	0.811872
AC004471.2	0.85826	0.280911	3.03562	0.0925383	0.92627	NA
AC004477.1	39.8281	-0.492804	0.873955	-0.563879	0.572837	0.891848
AC004477.2	0	NA	NA	NA	NA	NA
AC004477.3	14.395	-0.477643	0.84419	-0.5658	0.57153	0.891166
AC004485.1	0	NA	NA	NA	NA	NA
AC004486.1	0	NA	NA	NA	NA	NA
AC004490.1	0.463266	0.0802576	3.06019	0.0262263	0.979077	NA
AC004491.1	9.4706	2.08163	1.86538	1.11593	0.264452	NA
AC004492.1	3.33248	0.645655	2.69014	0.240008	0.810324	NA
AC004494.1	23.6788	-1.58566	0.991433	-1.59936	0.109741	0.585861
AC004494.2	0	NA	NA	NA	NA	NA
AC004520.1	28.6796	-0.34721	0.723997	-0.479574	0.63153	0.912245
AC004522.1	0.190356	0.842687	3.06548	0.274896	0.783396	NA
AC004522.2	0.309526	0.158608	3.06044	0.0518253	0.958668	NA
AC004528.1	1.17863	-0.937041	3.03473	-0.308773	0.757494	NA
AC004528.2	0	NA	NA	NA	NA	NA
AC004540.1	296.07	0.293105	0.30996	0.945623	0.344341	0.796181
AC004540.2	108.793	-0.158826	0.561499	-0.282861	0.777283	0.956201
AC004542.1	0	NA	NA	NA	NA	NA
AC004542.2	0	NA	NA	NA	NA	NA
AC004543.1	0	NA	NA	NA	NA	NA
AC004551.1	18.6975	0.244137	1.47383	0.165648	0.868434	0.975948
AC004552.1	194.002	0.595899	0.427512	1.39388	0.163355	0.658979
AC004554.1	0	NA	NA	NA	NA	NA
AC004554.2	7.46699	1.43163	2.95106	0.485126	0.627587	NA
AC004556.1	0	NA	NA	NA	NA	NA
AC004584.1	0.917371	-0.377579	3.01851	-0.125088	0.900454	NA
AC004584.2	6.17831	-0.337053	1.91806	-0.175726	0.86051	NA
AC004584.3	0.252328	-0.782543	3.06462	-0.255348	0.798455	NA
AC004585.1	3.12771	-2.0834	3.01774	-0.690384	0.489953	NA
AC004585.2	0	NA	NA	NA	NA	NA
AC004590.1	0	NA	NA	NA	NA	NA
AC004593.1	1.96627	0.788631	3.02098	0.261052	0.794053	NA
AC004593.2	1.75525	-1.33961	3.01442	-0.444401	0.656753	NA
AC004593.3	6.17895	-1.37157	2.14671	-0.638915	0.522878	NA
AC004594.1	0.411594	0.321312	3.04577	0.105494	0.915983	NA
AC004596.1	20.9013	0.60304	0.553312	1.08987	0.275769	0.752021
AC004597.1	1.51167	0.0303029	3.05512	0.00991871	0.992086	NA
AC004623.1	2.36092	1.4158	2.37539	0.596028	0.551157	NA
AC004637.1	0.462512	0.206255	3.05974	0.0674094	0.946256	NA
AC004656.1	169.113	-1.18245	0.682181	-1.73334	0.0830349	0.541112
AC004672.1	0.638612	-0.294127	3.05769	-0.0961926	0.923368	NA
AC004672.2	1.03315	1.15067	3.03549	0.379071	0.704635	NA
AC004674.1	0.0869944	0.675388	3.08409	0.218991	0.826657	NA
AC004674.2	0	NA	NA	NA	NA	NA
AC004678.1	3.25048	-0.985429	1.97435	-0.499116	0.617698	NA
AC004678.2	1.94242	-0.704928	3.01285	-0.233974	0.815005	NA
AC004687.1	333.595	-0.152294	0.456994	-0.333252	0.738944	0.94691
AC004690.1	0	NA	NA	NA	NA	NA
AC004690.2	0	NA	NA	NA	NA	NA
AC004691.1	0	NA	NA	NA	NA	NA
AC004691.2	0	NA	NA	NA	NA	NA
AC004692.1	0.667846	0.156624	3.04913	0.0513666	0.959033	NA
AC004692.2	0	NA	NA	NA	NA	NA
AC004696.1	0.462687	0.170388	3.05773	0.0557238	0.955562	NA
AC004696.2	2.09603	0.345765	2.98177	0.11596	0.907685	NA
AC004702.1	0	NA	NA	NA	NA	NA
AC004704.1	0	NA	NA	NA	NA	NA
AC004706.1	0.799622	0.312286	3.03813	0.102789	0.91813	NA
AC004706.2	0	NA	NA	NA	NA	NA
AC004706.3	4.34364	0.708395	2.57595	0.275004	0.783313	NA
AC004707.1	0	NA	NA	NA	NA	NA
AC004754.1	4.85019	-0.621643	2.18255	-0.284825	0.775778	NA
AC004771.1	2.51447	0.238649	3.008	0.079338	0.936764	NA
AC004771.2	1.81921	1.10433	3.04823	0.362286	0.717138	NA
AC004771.3	11.6783	0.510734	0.723493	0.705928	0.480233	0.8581
AC004771.4	0	NA	NA	NA	NA	NA
AC004771.5	10.9099	-0.341753	0.972762	-0.351322	0.725347	0.943954
AC004775.1	0.123401	-0.281931	3.07689	-0.0916285	0.926993	NA
AC004777.1	0.129603	-0.16561	3.06981	-0.053948	0.956977	NA
AC004784.1	0.542781	-0.230901	3.04037	-0.075945	0.939463	NA
AC004790.1	0	NA	NA	NA	NA	NA
AC004790.2	0	NA	NA	NA	NA	NA
AC004792.1	0	NA	NA	NA	NA	NA
AC004797.1	0.735494	0.688486	3.05875	0.225087	0.821911	NA
AC004801.1	14.6751	-0.704343	0.948467	-0.742612	0.457717	0.848642
AC004801.2	4.06127	-0.176151	3.02908	-0.0581535	0.953626	NA
AC004801.3	0.174167	-0.26686	3.0678	-0.0869875	0.930681	NA
AC004801.4	0.129603	-0.16561	3.06981	-0.053948	0.956977	NA
AC004801.5	0	NA	NA	NA	NA	NA
AC004801.6	7.56168	-1.34353	1.56214	-0.86006	0.389756	NA
AC004801.7	0.603219	-0.309668	3.05833	-0.101254	0.919349	NA
AC004803.1	122.066	-0.367046	0.389731	-0.941791	0.346299	0.797089
AC004805.1	0	NA	NA	NA	NA	NA
AC004805.2	0.460986	0.835799	3.04526	0.274459	0.783732	NA
AC004805.3	0	NA	NA	NA	NA	NA
AC004808.1	0.777619	-0.194985	3.05644	-0.0637948	0.949134	NA
AC004808.2	0	NA	NA	NA	NA	NA
AC004812.1	0.980659	0.691051	3.05748	0.22602	0.821186	NA
AC004812.2	188.497	-0.294956	0.457148	-0.645208	0.518793	0.874131
AC004816.1	14.3305	1.76306	1.34385	1.31195	0.189537	0.68121
AC004816.2	2.16732	-1.33635	2.92325	-0.457146	0.647566	NA
AC004817.1	1.79076	-0.951164	3.0308	-0.313833	0.753648	NA
AC004817.2	5.62825	0.344235	3.02658	0.113737	0.909446	NA
AC004817.3	24.6142	-0.969127	0.877141	-1.10487	0.269216	0.746936
AC004817.4	4.21698	-0.901944	3.04564	-0.296143	0.767121	NA
AC004824.1	0	NA	NA	NA	NA	NA
AC004825.1	0.0869944	0.675388	3.08409	0.218991	0.826657	NA
AC004825.2	89.9507	0.466318	0.514472	0.9064	0.364724	0.806453
AC004828.1	1.49044	-0.19804	3.05508	-0.0648233	0.948315	NA
AC004830.1	0	NA	NA	NA	NA	NA
AC004832.1	1.07937	-0.473638	3.02077	-0.156794	0.875407	NA
AC004832.2	0	NA	NA	NA	NA	NA
AC004832.3	0	NA	NA	NA	NA	NA
AC004832.4	6.51671	-0.337675	1.25539	-0.268981	0.787944	NA
AC004832.5	5.89432	0.374564	1.42033	0.263715	0.791999	NA
AC004832.6	5.05939	-0.187892	2.9663	-0.0633422	0.949494	NA
AC004834.1	2.58176	-0.647175	2.74516	-0.235752	0.813625	NA
AC004835.1	0.543902	-0.429328	3.03466	-0.141475	0.887495	NA
AC004835.2	0	NA	NA	NA	NA	NA
AC004836.1	0	NA	NA	NA	NA	NA
AC004837.1	0	NA	NA	NA	NA	NA
AC004837.2	47.4254	0.818145	0.668733	1.22343	0.221169	0.706349
AC004837.3	0	NA	NA	NA	NA	NA
AC004839.1	0.857749	-0.979062	3.01987	-0.324206	0.745782	NA
AC004840.1	1.9014	-0.986055	3.01841	-0.32668	0.74391	NA
AC004840.2	1.00097	-0.928817	3.0395	-0.305582	0.759923	NA
AC004846.1	15.9562	-0.545617	1.15464	-0.472545	0.636538	0.91316
AC004846.2	3.9989	1.95971	1.85007	1.05926	0.28948	NA
AC004847.1	64.0893	2.14902	0.584447	3.67701	0.000235982	0.0504141
AC004852.1	0	NA	NA	NA	NA	NA
AC004852.2	1.10819	-0.838111	3.03739	-0.275932	0.782601	NA
AC004852.3	0	NA	NA	NA	NA	NA
AC004853.1	0	NA	NA	NA	NA	NA
AC004854.1	7.12645	0.888308	2.99855	0.296246	0.767042	NA
AC004854.2	183.897	1.09255	0.483397	2.26015	0.0238119	0.3809
AC004858.1	1.30835	-0.18104	2.99888	-0.0603692	0.951862	NA
AC004862.1	0	NA	NA	NA	NA	NA
AC004865.1	2.31868	-1.96741	2.17648	-0.903941	0.366027	NA
AC004865.2	690.515	0.0990078	0.359561	0.275357	0.783042	0.957334
AC004866.1	0	NA	NA	NA	NA	NA
AC004866.2	0	NA	NA	NA	NA	NA
AC004869.1	0.0603219	-0.117244	3.0825	-0.0380352	0.96966	NA
AC004869.2	0	NA	NA	NA	NA	NA
AC004870.1	0.235995	0.232076	3.06281	0.0757722	0.9396	NA
AC004870.2	0.617864	-0.881262	3.05361	-0.288597	0.77289	NA
AC004870.3	0	NA	NA	NA	NA	NA
AC004870.4	0.683304	-0.219979	3.05765	-0.0719438	0.942647	NA
AC004872.1	0	NA	NA	NA	NA	NA
AC004875.1	0	NA	NA	NA	NA	NA
AC004877.1	0	NA	NA	NA	NA	NA
AC004877.2	6.14407	0.625048	2.01323	0.31047	0.756203	NA
AC004882.1	0.286843	-0.2456	3.05969	-0.0802696	0.936023	NA
AC004882.2	0	NA	NA	NA	NA	NA
AC004884.1	0.148325	0.808637	3.07547	0.262931	0.792604	NA
AC004884.2	25.1309	0.0186351	0.594513	0.0313451	0.974994	0.996706
AC004888.1	0.502413	-0.213714	3.05719	-0.0699056	0.944269	NA
AC004889.1	22.0013	-1.33528	0.679918	-1.96389	0.0495427	0.463185
AC004890.1	99.1427	0.85954	0.381467	2.25325	0.0242436	0.384094
AC004890.2	31.441	-0.0305578	0.769544	-0.039709	0.968325	0.995518
AC004890.3	4.73618	-1.61447	1.50322	-1.07401	0.282819	NA
AC004893.1	2.73391	0.333284	3.02679	0.110111	0.912321	NA
AC004893.2	0	NA	NA	NA	NA	NA
AC004895.1	3.94666	0.427283	1.5909	0.268579	0.788253	NA
AC004898.1	16.6088	1.27801	0.799632	1.59825	0.109987	0.586514
AC004899.1	1.16711	-0.384533	3.02722	-0.127025	0.89892	NA
AC004899.2	0	NA	NA	NA	NA	NA
AC004906.1	0.0930621	0.665072	3.08326	0.215704	0.829218	NA
AC004908.1	47.805	0.58489	0.622246	0.939966	0.347235	0.797089
AC004908.2	95.3222	1.11451	0.519708	2.1445	0.0319931	0.404054
AC004908.3	16.3601	-1.08152	0.848544	-1.27456	0.202465	0.692624
AC004910.1	1.39191	0.770214	3.05593	0.252039	0.801011	NA
AC004911.1	0	NA	NA	NA	NA	NA
AC004917.1	1.59449	-0.291833	3.03492	-0.0961585	0.923395	NA
AC004918.1	28.4092	-0.28578	0.522495	-0.546952	0.584412	0.896731
AC004918.3	67.406	-0.461975	0.507037	-0.911127	0.362228	0.804695
AC004920.1	0	NA	NA	NA	NA	NA
AC004921.1	21.714	0.870546	1.77508	0.490426	0.623833	0.908707
AC004922.1	13.7131	0.713908	0.882276	0.809166	0.41842	0.831188
AC004923.1	5.83481	0.472817	2.14381	0.22055	0.825443	NA
AC004923.2	0	NA	NA	NA	NA	NA
AC004923.3	0	NA	NA	NA	NA	NA
AC004923.4	11.3128	0.922928	1.04143	0.886211	0.375504	0.810798
AC004925.1	1.47942	0.425582	3.02883	0.14051	0.888257	NA
AC004930.1	0.518413	-0.191843	3.05785	-0.0627377	0.949975	NA
AC004936.1	0.972024	-0.196257	3.05588	-0.0642228	0.948793	NA
AC004938.1	0	NA	NA	NA	NA	NA
AC004941.1	0	NA	NA	NA	NA	NA
AC004941.2	1.06359	0.451474	3.00309	0.150337	0.880499	NA
AC004943.1	8.96395	-1.89116	1.49438	-1.26551	0.205687	NA
AC004943.2	183.222	-1.18589	0.668618	-1.77364	0.0761234	0.522845
AC004943.3	3.0407	-2.74863	3.00315	-0.915249	0.360061	NA
AC004944.1	0	NA	NA	NA	NA	NA
AC004945.1	0	NA	NA	NA	NA	NA
AC004946.1	0	NA	NA	NA	NA	NA
AC004947.1	4.96787	-1.16355	2.99075	-0.389048	0.69724	NA
AC004947.2	3.77278	-0.672147	3.00396	-0.223754	0.822949	NA
AC004948.1	1.91423	0.200717	3.03115	0.0662182	0.947204	NA
AC004949.1	0.631445	0.862038	3.04652	0.282958	0.777209	NA
AC004951.1	23.0116	0.40667	0.805959	0.504579	0.613855	0.907331
AC004951.2	19.2429	-0.24491	0.714279	-0.342878	0.73169	0.944975
AC004951.3	12.0945	0.601432	0.726778	0.827533	0.407935	0.825137
AC004951.4	6.1198	-1.06921	1.2889	-0.829548	0.406794	NA
AC004965.1	0	NA	NA	NA	NA	NA
AC004967.1	70.2961	0.511402	0.504964	1.01275	0.31118	0.776776
AC004969.1	0	NA	NA	NA	NA	NA
AC004972.1	0	NA	NA	NA	NA	NA
AC004973.1	1.25294	-0.444506	3.01349	-0.147506	0.882733	NA
AC004975.1	0.207638	0.120506	3.06525	0.0393137	0.96864	NA
AC004975.2	3.47973	-0.80948	3.00306	-0.269551	0.787505	NA
AC004980.1	230.354	0.510259	0.402049	1.26915	0.204388	0.694811
AC004980.2	11.8475	-0.0866168	0.921642	-0.0939809	0.925124	0.988153
AC004980.3	3.36392	-0.0506338	1.35745	-0.0373006	0.970245	NA
AC004980.4	0.686954	-1.33683	3.03773	-0.440073	0.659884	NA
AC004982.1	9.33352	-2.08011	1.37752	-1.51004	0.131032	NA
AC004982.2	54.4585	-2.11452	1.36104	-1.5536	0.120279	0.599756
AC004986.1	0.542555	0.738427	3.04886	0.242197	0.808627	NA
AC004987.1	1.84709	0.200666	2.11181	0.0950206	0.924298	NA
AC004987.2	51.1734	0.0359142	0.347175	0.103447	0.917608	0.986074
AC004987.3	0.0648016	-0.135173	3.08401	-0.0438304	0.96504	NA
AC004987.4	0.285159	0.323511	3.05293	0.105967	0.915608	NA
AC004988.1	0.933334	0.785391	3.05685	0.256928	0.797234	NA
AC004990.1	0.345911	1.48093	3.06209	0.483632	0.628647	NA
AC004994.1	0.34625	-0.781814	3.05752	-0.255702	0.798181	NA
AC004997.1	0.356161	1.3679	3.06082	0.446906	0.654943	NA
AC005000.1	163.316	-0.0268767	0.251559	-0.106841	0.914916	0.98547
AC005000.2	0	NA	NA	NA	NA	NA
AC005002.1	1.87609	-0.571776	2.15942	-0.264782	0.791177	NA
AC005002.2	1.33824	-0.318863	2.99876	-0.106332	0.915319	NA
AC005005.1	0.246446	0.312396	3.06955	0.101772	0.918937	NA
AC005005.2	1.39191	0.770214	3.05593	0.252039	0.801011	NA
AC005005.3	10.7088	1.0761	0.998384	1.07784	0.281106	NA
AC005005.4	3.73128	0.00852315	2.64327	0.00322447	0.997427	NA
AC005006.1	3.7051	0.951325	1.55387	0.612228	0.540387	NA
AC005008.1	0	NA	NA	NA	NA	NA
AC005008.2	1.92291	0.981133	2.99345	0.32776	0.743093	NA
AC005009.1	0.230086	-0.757257	3.06301	-0.247227	0.804733	NA
AC005009.2	0.155556	0.748806	3.0718	0.243768	0.807411	NA
AC005011.1	0.369167	0.548784	3.06056	0.179309	0.857695	NA
AC005013.1	0	NA	NA	NA	NA	NA
AC005014.1	3.49647	-2.15177	1.44994	-1.48405	0.137797	NA
AC005014.2	11.6849	-2.11783	1.03011	-2.05592	0.0397906	0.426989
AC005014.3	0.398127	1.46586	3.05615	0.479643	0.631481	NA
AC005019.1	0.0951778	0.814172	3.07589	0.264695	0.791244	NA
AC005019.2	0	NA	NA	NA	NA	NA
AC005020.1	62.0839	0.20333	0.545727	0.372586	0.709456	0.940651
AC005020.2	0	NA	NA	NA	NA	NA
AC005021.1	0	NA	NA	NA	NA	NA
AC005033.1	0	NA	NA	NA	NA	NA
AC005034.1	0	NA	NA	NA	NA	NA
AC005034.2	2.3969	1.02319	3.00776	0.340183	0.733719	NA
AC005034.3	71.4365	-0.35614	0.727805	-0.489335	0.624605	0.909221
AC005034.4	2.28765	0.457209	3.00437	0.152181	0.879044	NA
AC005034.5	1.44855	1.12288	3.0102	0.373024	0.709131	NA
AC005037.1	0.100483	-0.183074	3.07053	-0.0596229	0.952456	NA
AC005040.1	0	NA	NA	NA	NA	NA
AC005041.1	1.30627	-0.218899	3.05498	-0.0716532	0.942878	NA
AC005041.2	0	NA	NA	NA	NA	NA
AC005041.3	5.2875	1.12611	1.80285	0.624625	0.532217	NA
AC005042.1	2.72943	3.17674	3.00352	1.05767	0.290205	NA
AC005042.2	0	NA	NA	NA	NA	NA
AC005042.3	0.345832	0.329674	3.05052	0.108072	0.913939	NA
AC005046.1	1.45041	1.20529	3.01886	0.399254	0.689706	NA
AC005050.1	0.40193	-0.211647	3.05807	-0.0692095	0.944823	NA
AC005052.1	8.70217	1.58175	1.85395	0.85318	0.39356	NA
AC005062.1	7.39145	1.96685	1.58994	1.23706	0.216065	NA
AC005064.1	0	NA	NA	NA	NA	NA
AC005066.1	0	NA	NA	NA	NA	NA
AC005070.1	0.558373	0.802196	3.0605	0.262113	0.793235	NA
AC005070.2	0	NA	NA	NA	NA	NA
AC005070.3	43.6042	-0.0338873	0.528956	-0.0640645	0.948919	0.991409
AC005072.1	109.119	-0.25829	0.64283	-0.401801	0.68783	0.933848
AC005076.1	47.3694	0.682926	0.489355	1.39556	0.162846	0.657766
AC005077.1	0.148325	0.808637	3.07547	0.262931	0.792604	NA
AC005077.2	9.32417	-1.30397	1.22759	-1.06222	0.288134	NA
AC005077.3	0	NA	NA	NA	NA	NA
AC005077.4	0.123401	-0.281931	3.07689	-0.0916285	0.926993	NA
AC005082.1	78.7981	-1.73907	2.91394	-0.59681	0.550634	0.88529
AC005083.1	85.7598	0.58994	0.655813	0.899555	0.368357	0.807809
AC005084.1	0	NA	NA	NA	NA	NA
AC005086.1	15.9557	-1.63617	0.925766	-1.76737	0.077167	0.525787
AC005086.2	2.33963	1.64691	2.55638	0.644234	0.519424	NA
AC005086.3	4.72361	-2.55392	2.07183	-1.23269	0.217691	NA
AC005086.4	1.10324	0.691912	3.05705	0.226333	0.820942	NA
AC005088.1	0.311111	0.769813	3.0631	0.251318	0.801568	NA
AC005089.1	0.0869944	0.675388	3.08409	0.218991	0.826657	NA
AC005090.1	0	NA	NA	NA	NA	NA
AC005091.1	1.82931	-0.271853	3.00612	-0.0904331	0.927943	NA
AC005094.1	0	NA	NA	NA	NA	NA
AC005096.1	3.6235	-1.26614	1.55314	-0.815212	0.414951	NA
AC005099.1	8.48507	0.892372	0.722483	1.23515	0.216776	NA
AC005102.1	0.932037	-0.269453	3.05707	-0.0881407	0.929765	NA
AC005104.1	10.7751	1.23275	1.25006	0.986155	0.324057	NA
AC005104.2	0.828631	-0.865598	3.0493	-0.283868	0.776512	NA
AC005105.1	0	NA	NA	NA	NA	NA
AC005144.1	0.129603	-0.16561	3.06981	-0.053948	0.956977	NA
AC005150.1	1.4	0.788112	3.05577	0.257909	0.796477	NA
AC005154.1	446.059	-0.348291	0.240318	-1.44929	0.147255	0.639167
AC005154.2	0.450375	0.877987	3.06015	0.28691	0.774181	NA
AC005154.3	4.49897	0.597234	3.00321	0.198865	0.842368	NA
AC005154.4	0	NA	NA	NA	NA	NA
AC005154.5	1.02206	-1.99043	3.038	-0.655179	0.512353	NA
AC005154.6	0	NA	NA	NA	NA	NA
AC005156.1	7.08003	-1.11193	1.19909	-0.927315	0.353763	NA
AC005160.1	0	NA	NA	NA	NA	NA
AC005162.1	0	NA	NA	NA	NA	NA
AC005162.2	0	NA	NA	NA	NA	NA
AC005162.3	0.443512	0.270935	3.04724	0.0889118	0.929152	NA
AC005165.1	0.914007	0.293733	3.03387	0.0968178	0.922871	NA
AC005165.2	0	NA	NA	NA	NA	NA
AC005176.1	0	NA	NA	NA	NA	NA
AC005176.2	0	NA	NA	NA	NA	NA
AC005178.1	0	NA	NA	NA	NA	NA
AC005180.1	0.621358	-0.26499	3.05878	-0.0866326	0.930964	NA
AC005180.2	0.776698	-0.267654	3.05776	-0.0875327	0.930248	NA
AC005181.1	0	NA	NA	NA	NA	NA
AC005183.1	47.6097	-0.812192	1.0893	-0.745611	0.455902	0.847928
AC005185.1	0	NA	NA	NA	NA	NA
AC005186.1	0.932037	-0.269453	3.05707	-0.0881407	0.929765	NA
AC005189.1	5.88584	1.18481	0.931269	1.27225	0.203283	NA
AC005191.1	0	NA	NA	NA	NA	NA
AC005197.1	0.0502413	-0.140068	3.08437	-0.0454121	0.963779	NA
AC005208.1	1.00748	0.177907	3.03301	0.0586568	0.953225	NA
AC005209.1	0	NA	NA	NA	NA	NA
AC005220.1	0.776698	-0.467918	3.02707	-0.154578	0.877154	NA
AC005224.1	14.3644	-1.97372	0.883318	-2.23444	0.0254543	0.388868
AC005224.2	1.28128	-1.06027	3.04108	-0.348647	0.727354	NA
AC005224.3	5.77525	-1.1599	2.09056	-0.554827	0.579013	NA
AC005224.4	61.6136	-0.767211	0.985737	-0.778312	0.436385	0.84025
AC005225.1	1.60241	-0.853097	2.99866	-0.284493	0.776033	NA
AC005225.2	2.1695	0.815881	3.00722	0.271308	0.786154	NA
AC005225.3	0	NA	NA	NA	NA	NA
AC005225.4	13.839	-2.48895	1.72872	-1.43977	0.149933	0.641616
AC005229.1	0	NA	NA	NA	NA	NA
AC005229.2	0	NA	NA	NA	NA	NA
AC005229.3	0	NA	NA	NA	NA	NA
AC005229.4	135.956	0.0914728	0.459117	0.199236	0.842078	0.969213
AC005230.1	0	NA	NA	NA	NA	NA
AC005232.1	0.476403	0.218962	3.04642	0.0718753	0.942701	NA
AC005234.1	0.760325	0.396181	3.03426	0.130569	0.896116	NA
AC005237.1	0.793561	0.433732	3.0552	0.141965	0.887108	NA
AC005237.2	0.0869944	0.675388	3.08409	0.218991	0.826657	NA
AC005244.1	15.9601	0.624156	0.828315	0.753525	0.451134	0.846199
AC005244.2	0	NA	NA	NA	NA	NA
AC005252.1	0	NA	NA	NA	NA	NA
AC005252.2	0	NA	NA	NA	NA	NA
AC005252.3	0	NA	NA	NA	NA	NA
AC005253.1	33.8761	0.764071	0.607934	1.25683	0.208814	0.699536
AC005253.2	0	NA	NA	NA	NA	NA
AC005255.1	0	NA	NA	NA	NA	NA
AC005256.1	0	NA	NA	NA	NA	NA
AC005258.1	0	NA	NA	NA	NA	NA
AC005261.1	516.614	-0.989244	0.321975	-3.07243	0.00212325	0.14467
AC005261.2	2.59824	-2.4867	3.01159	-0.825708	0.40897	NA
AC005261.3	159.038	-0.570632	0.448048	-1.2736	0.202806	0.692812
AC005261.4	4.00085	1.18137	1.19599	0.987774	0.323264	NA
AC005261.5	30.9967	-0.340334	0.893245	-0.381008	0.703197	0.938435
AC005262.1	0.827739	0.216283	3.02066	0.0716013	0.942919	NA
AC005262.2	0	NA	NA	NA	NA	NA
AC005264.1	80.5118	0.731851	0.61834	1.18357	0.236581	0.720967
AC005274.1	0	NA	NA	NA	NA	NA
AC005277.1	0	NA	NA	NA	NA	NA
AC005277.2	0.348334	-0.285136	3.06097	-0.0931521	0.925783	NA
AC005280.1	0.490329	0.683447	3.06127	0.223256	0.823336	NA
AC005280.2	3.01669	-0.0444633	2.99048	-0.0148683	0.988137	NA
AC005280.3	0	NA	NA	NA	NA	NA
AC005281.1	1.58276	0.424609	3.05554	0.138964	0.889479	NA
AC005288.1	106.864	-0.180861	0.381309	-0.474318	0.635273	0.912847
AC005291.1	0	NA	NA	NA	NA	NA
AC005291.2	0.303691	-0.208428	3.06254	-0.0680573	0.94574	NA
AC005294.1	0	NA	NA	NA	NA	NA
AC005296.1	0	NA	NA	NA	NA	NA
AC005297.1	0	NA	NA	NA	NA	NA
AC005297.2	0	NA	NA	NA	NA	NA
AC005297.3	0	NA	NA	NA	NA	NA
AC005300.1	1.70831	-0.932307	3.04294	-0.306384	0.759313	NA
AC005301.1	0	NA	NA	NA	NA	NA
AC005303.1	0	NA	NA	NA	NA	NA
AC005304.1	1.1343	0.318611	3.03349	0.105031	0.916351	NA
AC005304.2	0	NA	NA	NA	NA	NA
AC005304.3	0	NA	NA	NA	NA	NA
AC005306.1	0.584637	-0.397205	3.02709	-0.131217	0.895604	NA
AC005307.1	1.38222	-1.05265	3.03526	-0.346807	0.728736	NA
AC005323.1	0.370204	-0.369171	3.0634	-0.12051	0.904079	NA
AC005323.2	0.0502413	-0.140068	3.08437	-0.0454121	0.963779	NA
AC005324.1	0	NA	NA	NA	NA	NA
AC005324.2	0.200965	-0.201643	3.06239	-0.0658451	0.947501	NA
AC005324.3	0.474525	0.271547	3.04825	0.0890829	0.929016	NA
AC005324.4	0	NA	NA	NA	NA	NA
AC005324.5	0.118378	-0.483286	3.07852	-0.156986	0.875256	NA
AC005324.6	0	NA	NA	NA	NA	NA
AC005326.1	0.155556	0.748806	3.0718	0.243768	0.807411	NA
AC005329.1	3.43771	-0.881165	1.88552	-0.467334	0.640261	NA
AC005329.2	0	NA	NA	NA	NA	NA
AC005329.3	0.259206	-0.182707	3.06198	-0.0596696	0.952419	NA
AC005330.1	1.36324	-0.887908	3.03245	-0.292802	0.769673	NA
AC005332.1	14.5831	1.41072	1.04561	1.34918	0.177278	0.670854
AC005332.2	1.01148	-0.49476	3.03096	-0.163235	0.870333	NA
AC005332.3	14.5636	-0.228213	1.59004	-0.143527	0.885874	0.97958
AC005332.4	27.8334	-0.303635	0.602425	-0.504022	0.614246	0.907472
AC005332.5	242.513	0.635874	0.337079	1.88642	0.0592379	0.485518
AC005332.6	12.2133	-1.16147	0.753245	-1.54196	0.123083	0.603959
AC005332.7	163.162	0.0680661	0.383612	0.177435	0.859167	0.973247
AC005332.8	2.59843	-1.14793	2.82627	-0.406165	0.684621	NA
AC005336.1	1.64529	-1.17763	3.0071	-0.391616	0.695342	NA
AC005336.2	50.9244	-0.322426	0.710316	-0.453918	0.649888	0.919527
AC005336.3	39.9717	-2.0371	0.959433	-2.12323	0.0337342	0.407447
AC005339.1	0	NA	NA	NA	NA	NA
AC005341.1	0	NA	NA	NA	NA	NA
AC005342.1	0.458231	-0.446081	3.04626	-0.146436	0.883578	NA
AC005342.2	10.324	0.695801	1.19085	0.58429	0.559026	NA
AC005344.1	0	NA	NA	NA	NA	NA
AC005345.1	0	NA	NA	NA	NA	NA
AC005351.1	0.34268	-0.183405	3.0483	-0.0601662	0.952023	NA
AC005355.1	1.57436	-0.297103	3.01976	-0.098386	0.921626	NA
AC005355.2	7.71265	2.16852	1.33508	1.62426	0.10432	NA
AC005357.1	0.562969	0.881769	3.05887	0.288266	0.773143	NA
AC005357.2	1.73332	-0.593541	3.01036	-0.197166	0.843698	NA
AC005358.1	0	NA	NA	NA	NA	NA
AC005358.2	0.580557	-0.293023	3.05809	-0.0958191	0.923664	NA
AC005363.1	0	NA	NA	NA	NA	NA
AC005363.2	2.98767	-0.222937	1.39912	-0.15934	0.873401	NA
AC005377.1	0	NA	NA	NA	NA	NA
AC005379.1	0.541815	1.39238	3.05628	0.455581	0.648691	NA
AC005381.1	1.04567	-0.46455	3.03456	-0.153086	0.87833	NA
AC005383.1	0.895446	-0.365038	3.0441	-0.119916	0.904549	NA
AC005387.1	5.82236	0.996232	1.1562	0.861645	0.388883	NA
AC005387.2	2.42472	-1.02172	2.31418	-0.441505	0.658848	NA
AC005391.1	3.64134	1.21466	1.51871	0.799793	0.423831	NA
AC005392.1	0	NA	NA	NA	NA	NA
AC005392.2	26.6045	-0.782411	1.04064	-0.751857	0.452137	0.846305
AC005392.3	0	NA	NA	NA	NA	NA
AC005393.1	0	NA	NA	NA	NA	NA
AC005394.1	0	NA	NA	NA	NA	NA
AC005394.2	7.80022	0.754123	2.68771	0.280581	0.779031	NA
AC005410.1	240.019	0.403445	0.467651	0.862705	0.3883	0.816951
AC005410.2	2.96046	-0.853169	2.33694	-0.36508	0.715052	NA
AC005412.1	0.759227	-0.220936	3.05725	-0.0722661	0.94239	NA
AC005476.1	10.6695	0.853029	1.00963	0.844892	0.398171	NA
AC005476.2	10.4715	-0.13921	0.979511	-0.142122	0.886984	NA
AC005479.1	3.05521	-2.75775	2.99673	-0.920253	0.35744	NA
AC005479.2	1.86829	-1.69481	3.00701	-0.563619	0.573014	NA
AC005480.1	10.3075	-0.94709	0.818479	-1.15713	0.247217	NA
AC005480.2	0.155556	0.748806	3.0718	0.243768	0.807411	NA
AC005481.1	16.3421	0.754134	1.57597	0.478521	0.632279	0.912429
AC005482.1	0	NA	NA	NA	NA	NA
AC005486.1	0	NA	NA	NA	NA	NA
AC005487.1	0	NA	NA	NA	NA	NA
AC005495.1	0.580557	-0.293023	3.05809	-0.0958191	0.923664	NA
AC005498.1	0.449773	0.355265	3.04648	0.116615	0.907165	NA
AC005498.2	6.9852	-1.10717	1.59167	-0.695606	0.486676	NA
AC005498.3	24.6906	-0.156837	0.759226	-0.206575	0.836342	0.968407
AC005514.1	1.35445	0.303002	3.01198	0.100599	0.919869	NA
AC005515.1	0.40193	-0.211647	3.05807	-0.0692095	0.944823	NA
AC005515.2	0	NA	NA	NA	NA	NA
AC005518.1	0	NA	NA	NA	NA	NA
AC005518.2	0	NA	NA	NA	NA	NA
AC005519.1	17.559	-1.08142	1.01694	-1.06341	0.287597	0.761149
AC005520.1	8.50757	-0.0627108	1.08824	-0.057626	0.954047	NA
AC005520.2	135.839	-0.00826074	0.423417	-0.0195097	0.984435	0.996763
AC005520.3	17.9392	1.66966	0.64266	2.59805	0.00937551	0.282768
AC005520.4	0.290838	0.419694	3.0596	0.137173	0.890894	NA
AC005520.5	0	NA	NA	NA	NA	NA
AC005521.1	2.57153	0.876536	1.58195	0.554087	0.57952	NA
AC005522.1	3.50698	-0.278703	2.1166	-0.131675	0.895242	NA
AC005523.1	0.805363	0.624266	3.04684	0.204889	0.837658	NA
AC005523.2	0	NA	NA	NA	NA	NA
AC005524.1	0	NA	NA	NA	NA	NA
AC005529.1	0.946758	-0.742706	3.05506	-0.243107	0.807923	NA
AC005531.1	0.531285	-1.13227	3.04195	-0.372218	0.70973	NA
AC005532.1	1.56535	-0.715025	2.9925	-0.238939	0.811153	NA
AC005532.2	0	NA	NA	NA	NA	NA
AC005534.1	0.603863	1.49953	3.05381	0.491036	0.623401	NA
AC005534.2	11.7653	0.161058	0.771697	0.208706	0.834678	0.96808
AC005537.1	11.8475	0.283715	3.0248	0.0937964	0.925271	0.988153
AC005538.1	0	NA	NA	NA	NA	NA
AC005538.2	0	NA	NA	NA	NA	NA
AC005539.1	0	NA	NA	NA	NA	NA
AC005540.1	23.5818	0.173773	0.771601	0.225211	0.821815	0.966306
AC005544.1	0	NA	NA	NA	NA	NA
AC005544.2	0	NA	NA	NA	NA	NA
AC005546.1	7.29365	-2.20341	1.29376	-1.7031	0.0885485	NA
AC005549.1	0	NA	NA	NA	NA	NA
AC005550.1	0	NA	NA	NA	NA	NA
AC005550.2	0	NA	NA	NA	NA	NA
AC005551.1	1.90703	-0.069092	2.07702	-0.033265	0.973463	NA
AC005552.1	0	NA	NA	NA	NA	NA
AC005559.1	0	NA	NA	NA	NA	NA
AC005562.1	17.0203	-0.198757	0.51754	-0.384042	0.700947	0.937874
AC005562.2	0	NA	NA	NA	NA	NA
AC005578.1	9.26117	2.43772	1.12742	2.16222	0.0306014	NA
AC005580.1	0.0648016	-0.135173	3.08401	-0.0438304	0.96504	NA
AC005586.1	27.9894	-0.279426	0.765387	-0.365078	0.715053	0.94192
AC005586.2	6.90713	-1.14368	1.75785	-0.650617	0.515294	NA
AC005587.1	0.278741	-0.820059	3.06874	-0.26723	0.789292	NA
AC005588.1	0.233333	0.762575	3.06609	0.248713	0.803583	NA
AC005592.1	0	NA	NA	NA	NA	NA
AC005593.1	74.7818	0.897831	0.494415	1.81595	0.0693785	0.508173
AC005597.1	0	NA	NA	NA	NA	NA
AC005606.1	0	NA	NA	NA	NA	NA
AC005606.2	0	NA	NA	NA	NA	NA
AC005609.1	0.112594	0.829672	3.07712	0.269626	0.787448	NA
AC005609.2	0	NA	NA	NA	NA	NA
AC005609.3	0	NA	NA	NA	NA	NA
AC005609.4	0	NA	NA	NA	NA	NA
AC005609.5	0	NA	NA	NA	NA	NA
AC005614.1	2.22509	1.46795	3.04017	0.48285	0.629202	NA
AC005614.2	0	NA	NA	NA	NA	NA
AC005616.1	0	NA	NA	NA	NA	NA
AC005618.1	10.5057	-0.766676	2.03872	-0.376058	0.706874	NA
AC005618.2	0	NA	NA	NA	NA	NA
AC005618.3	0	NA	NA	NA	NA	NA
AC005622.1	2.34866	0.946543	3.01033	0.314432	0.753193	NA
AC005625.1	0	NA	NA	NA	NA	NA
AC005632.1	1.98931	-0.373723	3.03422	-0.123169	0.901973	NA
AC005632.2	57.4784	0.0320707	0.587455	0.0545926	0.956463	0.99226
AC005632.3	0.600305	-0.341642	3.03493	-0.11257	0.910372	NA
AC005632.4	0	NA	NA	NA	NA	NA
AC005670.1	0.490246	0.216604	3.04001	0.071251	0.943198	NA
AC005670.2	0	NA	NA	NA	NA	NA
AC005674.1	0.580557	-0.293023	3.05809	-0.0958191	0.923664	NA
AC005674.2	35.0162	0.16036	0.743814	0.215591	0.829306	0.967472
AC005682.1	9.49527	-1.39076	1.40619	-0.989031	0.322648	NA
AC005691.1	0	NA	NA	NA	NA	NA
AC005692.1	0	NA	NA	NA	NA	NA
AC005692.2	0	NA	NA	NA	NA	NA
AC005695.1	0.194405	-0.176843	3.06465	-0.0577042	0.953984	NA
AC005695.2	0.148325	0.808637	3.07547	0.262931	0.792604	NA
AC005695.3	14.1427	0.0915434	0.992735	0.0922134	0.926529	0.988153
AC005696.1	19.982	-1.09093	0.72789	-1.49876	0.133935	0.619086
AC005696.2	0	NA	NA	NA	NA	NA
AC005696.3	2.74704	-0.310273	2.98636	-0.103897	0.917251	NA
AC005696.4	30.5771	-2.7432	1.29036	-2.12592	0.0335102	0.407268
AC005697.1	0.553833	1.30917	3.04062	0.43056	0.666788	NA
AC005697.2	1.08889	0.786552	3.05639	0.257347	0.796911	NA
AC005699.1	0.376093	0.176251	3.06029	0.0575927	0.954073	NA
AC005702.1	0	NA	NA	NA	NA	NA
AC005702.2	2.90858	-1.29677	3.00553	-0.431463	0.666132	NA
AC005702.3	0.174167	-0.26686	3.0678	-0.0869875	0.930681	NA
AC005702.4	0	NA	NA	NA	NA	NA
AC005703.1	0	NA	NA	NA	NA	NA
AC005703.2	0	NA	NA	NA	NA	NA
AC005703.3	0	NA	NA	NA	NA	NA
AC005703.4	0.375913	0.371306	3.05777	0.121431	0.90335	NA
AC005703.5	0.129603	-0.16561	3.06981	-0.053948	0.956977	NA
AC005703.6	5.95364	0.948707	2.90124	0.327001	0.743667	NA
AC005722.1	3.75849	-0.200081	3.05417	-0.0655107	0.947767	NA
AC005722.2	0.466667	0.777465	3.06003	0.254071	0.799441	NA
AC005722.3	0	NA	NA	NA	NA	NA
AC005725.1	0	NA	NA	NA	NA	NA
AC005726.1	71.9377	0.0152171	0.443137	0.0343394	0.972606	0.996421
AC005726.2	0.316987	0.190486	3.05806	0.0622899	0.950332	NA
AC005726.3	14.4779	-0.357236	0.918039	-0.38913	0.69718	0.9356
AC005726.4	0	NA	NA	NA	NA	NA
AC005726.5	0	NA	NA	NA	NA	NA
AC005730.1	0.592692	0.178044	3.04269	0.0585151	0.953338	NA
AC005730.2	1.38758	0.866532	3.04275	0.284786	0.775808	NA
AC005730.3	3.3546	1.69379	1.47675	1.14698	0.251391	NA
AC005736.1	5.52705	-1.97265	3.02316	-0.652512	0.514071	NA
AC005736.2	1.16505	-0.271269	3.05639	-0.088755	0.929277	NA
AC005736.3	0.245165	0.669005	3.06854	0.218021	0.827413	NA
AC005740.1	17.6123	-0.887413	0.793189	-1.11879	0.263229	0.743093
AC005740.2	2.39783	2.19004	2.01016	1.08949	0.27594	NA
AC005740.3	1.83153	-1.34351	2.11932	-0.633937	0.526122	NA
AC005740.4	0.889342	0.196571	3.03612	0.0647442	0.948378	NA
AC005741.1	0	NA	NA	NA	NA	NA
AC005746.1	0	NA	NA	NA	NA	NA
AC005746.2	0	NA	NA	NA	NA	NA
AC005746.3	1.4703	1.15189	3.01272	0.382344	0.702206	NA
AC005753.1	0	NA	NA	NA	NA	NA
AC005757.1	3.40455	-0.980266	2.41087	-0.406603	0.684299	NA
AC005758.1	0	NA	NA	NA	NA	NA
AC005759.1	9.69872	0.0586398	0.997195	0.0588047	0.953108	NA
AC005771.1	0	NA	NA	NA	NA	NA
AC005772.1	0	NA	NA	NA	NA	NA
AC005774.1	0	NA	NA	NA	NA	NA
AC005775.1	6.61227	-0.306694	1.25893	-0.243616	0.807528	NA
AC005776.1	5.3171	-2.01758	1.7643	-1.14356	0.252807	NA
AC005776.2	24.4891	-0.262673	0.595849	-0.440838	0.65933	0.923561
AC005777.1	0.0580557	-0.120936	3.08282	-0.0392291	0.968708	NA
AC005779.1	0.244813	0.442668	3.06403	0.144472	0.885127	NA
AC005779.2	0.17826	0.268017	3.0672	0.0873816	0.930368	NA
AC005785.1	23.9621	-1.6746	0.93329	-1.7943	0.0727655	0.514071
AC005785.2	19.0016	0.249868	0.889826	0.280806	0.77886	0.956276
AC005786.1	2.98683	0.522488	1.04635	0.499344	0.617537	NA
AC005786.2	2.50008	1.84818	2.75026	0.672	0.501584	NA
AC005786.3	0	NA	NA	NA	NA	NA
AC005786.4	0.246803	-0.355591	3.06787	-0.115908	0.907725	NA
AC005789.1	0	NA	NA	NA	NA	NA
AC005790.1	0	NA	NA	NA	NA	NA
AC005796.1	2.21942	-1.01519	2.45754	-0.413093	0.679539	NA
AC005798.1	0	NA	NA	NA	NA	NA
AC005808.1	0.0562969	0.649172	3.08186	0.210643	0.833166	NA
AC005821.1	0.621358	-0.26499	3.05878	-0.0866326	0.930964	NA
AC005822.1	23.017	0.232746	0.4759	0.489065	0.624796	0.909345
AC005823.1	0.40193	-0.211647	3.05807	-0.0692095	0.944823	NA
AC005823.2	0	NA	NA	NA	NA	NA
AC005828.1	3.03991	-0.525771	2.00497	-0.262234	0.793141	NA
AC005828.2	0.683304	-0.219979	3.05765	-0.0719438	0.942647	NA
AC005828.3	0	NA	NA	NA	NA	NA
AC005828.4	3.50652	0.923202	2.18046	0.423398	0.672005	NA
AC005828.5	2.09439	-0.444021	3.00541	-0.14774	0.882548	NA
AC005828.6	1.80065	-0.0185547	3.00202	-0.00618074	0.995069	NA
AC005828.7	1.01508	-2.08893	3.03501	-0.688276	0.491279	NA
AC005829.1	28.8712	0.484836	0.569465	0.851388	0.394554	0.819516
AC005829.2	82.3208	0.073439	0.521489	0.140826	0.888008	0.979916
AC005831.1	54.2982	-0.695935	0.648615	-1.07296	0.283291	0.75829
AC005832.1	0.151845	-0.189283	3.07081	-0.0616396	0.95085	NA
AC005832.2	0	NA	NA	NA	NA	NA
AC005832.3	6.55773	1.14212	1.20112	0.95088	0.341665	NA
AC005832.4	0	NA	NA	NA	NA	NA
AC005833.1	0.259206	-0.182707	3.06198	-0.0596696	0.952419	NA
AC005833.2	0	NA	NA	NA	NA	NA
AC005833.3	1.57895	0.30218	3.02918	0.0997564	0.920538	NA
AC005837.1	12.5403	0.510427	0.989699	0.51574	0.606036	0.903339
AC005837.2	0	NA	NA	NA	NA	NA
AC005837.3	47.6594	-0.0227524	0.941826	-0.0241577	0.980727	0.996706
AC005838.1	0	NA	NA	NA	NA	NA
AC005838.2	18.2919	-0.660363	0.825038	-0.800403	0.423477	0.83342
AC005839.1	103.633	-1.01168	0.348592	-2.9022	0.00370549	0.193374
AC005840.1	21.6931	0.658227	0.531859	1.2376	0.215866	0.702999
AC005840.2	10.6207	-0.783445	1.32033	-0.593371	0.552933	NA
AC005840.3	13.2891	-1.00048	1.55028	-0.645354	0.518698	0.874131
AC005840.4	6.59259	0.859801	1.01901	0.843762	0.398803	NA
AC005841.1	0	NA	NA	NA	NA	NA
AC005842.1	5.5077	0.354142	1.39298	0.254233	0.799315	NA
AC005845.1	5.96815	4.28313	2.09656	2.04293	0.0410592	NA
AC005856.1	3.5335	-0.637872	1.55451	-0.410336	0.68156	NA
AC005858.1	0	NA	NA	NA	NA	NA
AC005858.2	0	NA	NA	NA	NA	NA
AC005858.3	0	NA	NA	NA	NA	NA
AC005863.1	0.0777778	0.671191	3.08376	0.217654	0.827699	NA
AC005865.1	0	NA	NA	NA	NA	NA
AC005865.2	0.996271	0.292231	3.03361	0.0963311	0.923258	NA
AC005868.1	0	NA	NA	NA	NA	NA
AC005871.1	0	NA	NA	NA	NA	NA
AC005871.2	0.765069	-0.730508	3.02985	-0.241104	0.809475	NA
AC005884.1	1.02164	1.46632	3.02228	0.48517	0.627556	NA
AC005884.2	0	NA	NA	NA	NA	NA
AC005899.1	0.612934	0.317571	3.03683	0.104573	0.916714	NA
AC005899.2	0.237945	0.849019	3.06323	0.277165	0.781654	NA
AC005899.3	0	NA	NA	NA	NA	NA
AC005899.4	0	NA	NA	NA	NA	NA
AC005899.5	2.01874	-1.16898	2.41342	-0.484366	0.628126	NA
AC005899.6	5.81114	0.357002	1.76497	0.202271	0.839705	NA
AC005899.7	7.74896	-0.100689	1.91163	-0.0526715	0.957994	NA
AC005899.8	25.8408	0.270866	0.686867	0.39435	0.693323	0.934908
AC005901.1	0	NA	NA	NA	NA	NA
AC005906.1	0.348334	-0.285136	3.06097	-0.0931521	0.925783	NA
AC005906.2	0.19566	0.264621	3.06204	0.0864199	0.931133	NA
AC005908.1	0	NA	NA	NA	NA	NA
AC005908.2	0	NA	NA	NA	NA	NA
AC005909.1	0.194405	-0.176843	3.06465	-0.0577042	0.953984	NA
AC005911.1	19.1146	-0.432521	0.713017	-0.606606	0.544112	0.883057
AC005912.1	633.999	0.83849	0.341739	2.4536	0.0141434	0.328797
AC005912.2	0	NA	NA	NA	NA	NA
AC005915.1	1.3643	-0.370443	3.03463	-0.122072	0.902842	NA
AC005920.1	45.2854	-0.609051	0.983488	-0.619276	0.535734	0.879905
AC005920.2	9.75397	-2.28465	1.29397	-1.76561	0.0774606	NA
AC005920.3	0.148325	0.808637	3.07547	0.262931	0.792604	NA
AC005920.4	0	NA	NA	NA	NA	NA
AC005921.1	0	NA	NA	NA	NA	NA
AC005921.2	0	NA	NA	NA	NA	NA
AC005921.3	85.31	-0.402319	0.518222	-0.776345	0.437545	0.841131
AC005943.1	0	NA	NA	NA	NA	NA
AC005943.2	0	NA	NA	NA	NA	NA
AC005944.1	0	NA	NA	NA	NA	NA
AC005951.1	0	NA	NA	NA	NA	NA
AC005954.1	0	NA	NA	NA	NA	NA
AC005954.2	0	NA	NA	NA	NA	NA
AC005962.1	3.95611	-1.99464	1.48861	-1.33994	0.180266	NA
AC005972.1	33.186	0.994738	0.896495	1.10959	0.267177	0.746469
AC005972.2	1.95471	0.318216	3.02997	0.105023	0.916358	NA
AC005972.3	0	NA	NA	NA	NA	NA
AC005972.4	0.445513	0.473157	3.0541	0.154925	0.87688	NA
AC005993.1	0.760806	0.302473	3.04244	0.0994181	0.920806	NA
AC005996.1	0	NA	NA	NA	NA	NA
AC005999.1	0	NA	NA	NA	NA	NA
AC006001.1	2.44564	-0.409563	2.39914	-0.170713	0.86445	NA
AC006001.2	38.874	0.535763	0.629585	0.850978	0.394782	0.819629
AC006001.3	1799.18	0.54822	0.34833	1.57385	0.115521	0.592011
AC006001.4	0	NA	NA	NA	NA	NA
AC006003.1	0	NA	NA	NA	NA	NA
AC006004.1	0	NA	NA	NA	NA	NA
AC006006.1	0	NA	NA	NA	NA	NA
AC006007.1	0.372249	0.793696	3.06378	0.259058	0.79559	NA
AC006011.1	0	NA	NA	NA	NA	NA
AC006011.2	3.48669	-0.143535	3.00554	-0.0477568	0.96191	NA
AC006012.1	35.1391	-0.193016	1.00418	-0.192213	0.847576	0.970135
AC006013.1	0	NA	NA	NA	NA	NA
AC006015.1	0.245165	0.669005	3.06854	0.218021	0.827413	NA
AC006017.1	1900-01-01 22:18:02	0.474403	2.99223	0.158545	0.874027	NA
AC006019.1	0.129603	-0.16561	3.06981	-0.053948	0.956977	NA
AC006019.2	0	NA	NA	NA	NA	NA
AC006019.3	0.259206	-0.182707	3.06198	-0.0596696	0.952419	NA
AC006020.1	0	NA	NA	NA	NA	NA
AC006022.1	0	NA	NA	NA	NA	NA
AC006023.1	1.20831	-1.88923	3.03816	-0.621833	0.534052	NA
AC006023.2	0.232223	-0.275758	3.06445	-0.0899861	0.928298	NA
AC006026.1	28.1922	-0.316359	0.472593	-0.669411	0.503233	0.868243
AC006026.2	0	NA	NA	NA	NA	NA
AC006026.3	4.72223	-0.895121	1.37073	-0.653026	0.513739	NA
AC006027.1	0	NA	NA	NA	NA	NA
AC006028.1	0.416259	1.04213	3.05221	0.341434	0.732777	NA
AC006030.1	0.517763	2.22694	3.0505	0.730026	0.465375	NA
AC006033.1	23.5886	-0.793701	0.885186	-0.896649	0.369906	0.808958
AC006033.2	37.4022	-2.88765	1.28332	-2.25013	0.0244404	0.384098
AC006037.1	0	NA	NA	NA	NA	NA
AC006037.2	0	NA	NA	NA	NA	NA
AC006041.1	0.180913	-0.682398	3.07562	-0.221873	0.824413	NA
AC006042.1	0.791781	-1.77517	3.04849	-0.582313	0.560356	NA
AC006042.2	13.2853	0.390977	0.653504	0.598278	0.549654	0.88518
AC006042.3	14.9582	1.25287	1.94119	0.645412	0.51866	0.874131
AC006042.4	11.6825	2.03606	1.52655	1.33376	0.182282	0.674078
AC006055.1	0	NA	NA	NA	NA	NA
AC006058.1	0	NA	NA	NA	NA	NA
AC006058.2	0.186124	0.770398	3.07297	0.250701	0.802045	NA
AC006058.3	0.151845	-0.189283	3.07081	-0.0616396	0.95085	NA
AC006058.4	0	NA	NA	NA	NA	NA
AC006059.1	7.1808	0.13291	1.22017	0.108927	0.91326	NA
AC006063.1	0.135833	0.270884	3.06999	0.0882359	0.929689	NA
AC006063.2	0.155556	0.748806	3.0718	0.243768	0.807411	NA
AC006064.1	0.537302	-0.369921	3.03486	-0.121891	0.902985	NA
AC006064.2	5.62847	2.2201	1.70053	1.30553	0.191711	NA
AC006064.3	5.05071	0.766061	1.83399	0.417703	0.676164	NA
AC006064.4	0	NA	NA	NA	NA	NA
AC006064.5	0	NA	NA	NA	NA	NA
AC006064.6	0	NA	NA	NA	NA	NA
AC006065.1	0.0951778	0.814172	3.07589	0.264695	0.791244	NA
AC006065.2	0	NA	NA	NA	NA	NA
AC006065.3	0.245165	0.669005	3.06854	0.218021	0.827413	NA
AC006065.4	0.129603	-0.16561	3.06981	-0.053948	0.956977	NA
AC006065.5	0	NA	NA	NA	NA	NA
AC006065.6	0	NA	NA	NA	NA	NA
AC006076.1	0	NA	NA	NA	NA	NA
AC006077.1	0	NA	NA	NA	NA	NA
AC006077.2	177.022	-0.0802221	0.453664	-0.176831	0.859641	0.973247
AC006111.1	0	NA	NA	NA	NA	NA
AC006111.2	3.00316	-0.467667	2.9799	-0.15694	0.875292	NA
AC006111.3	0.466667	0.777465	3.06003	0.254071	0.799441	NA
AC006115.1	0.0741626	0.654675	3.08237	0.212394	0.8318	NA
AC006115.2	0	NA	NA	NA	NA	NA
AC006115.3	0	NA	NA	NA	NA	NA
AC006116.1	7.08968	-1.48374	1.25704	-1.18034	0.237864	NA
AC006116.10	1.26238	-0.385067	2.65968	-0.14478	0.884885	NA
AC006116.2	0.861071	-0.56366	3.03417	-0.185771	0.852625	NA
AC006116.3	0.559623	0.266938	3.04576	0.0876423	0.930161	NA
AC006116.4	1.54835	-1.50868	3.00566	-0.501947	0.615705	NA
AC006116.5	1.14185	0.831572	3.03268	0.274204	0.783928	NA
AC006116.6	2.66548	-2.37925	3.01788	-0.788383	0.430473	NA
AC006116.7	0	NA	NA	NA	NA	NA
AC006116.8	12.3125	-0.465831	1.49669	-0.311241	0.755618	0.949949
AC006116.9	0.88774	-0.191663	3.04422	-0.0629594	0.949799	NA
AC006122.1	65.6511	0.680778	0.384556	1.7703	0.076678	0.524497
AC006122.2	11.4869	-1.80088	0.826846	-2.17802	0.0294049	0.395977
AC006128.1	81.7439	0.447561	0.661935	0.676141	0.498951	0.867444
AC006130.1	4.04901	1.92193	2.29933	0.835864	0.403231	NA
AC006130.2	0	NA	NA	NA	NA	NA
AC006133.1	0	NA	NA	NA	NA	NA
AC006141.1	33.6505	-0.577916	0.503556	-1.14767	0.251105	0.733506
AC006144.1	1.33906	-1.64391	3.043	-0.540227	0.589041	NA
AC006145.1	0.726184	0.544909	3.04607	0.17889	0.858024	NA
AC006146.1	0	NA	NA	NA	NA	NA
AC006148.1	1.09179	-0.808223	3.0305	-0.266696	0.789703	NA
AC006148.2	0.281485	0.867125	3.06384	0.283019	0.777162	NA
AC006150.1	0	NA	NA	NA	NA	NA
AC006153.1	0	NA	NA	NA	NA	NA
AC006157.1	6.87002	0.23018	1.87943	0.122474	0.902524	NA
AC006158.1	0	NA	NA	NA	NA	NA
AC006159.1	0	NA	NA	NA	NA	NA
AC006159.2	0	NA	NA	NA	NA	NA
AC006160.1	7.67262	2.00276	1.76395	1.13538	0.256215	NA
AC006160.2	0	NA	NA	NA	NA	NA
AC006195.1	1.73446	0.273319	3.02924	0.0902268	0.928107	NA
AC006197.1	0	NA	NA	NA	NA	NA
AC006199.1	0	NA	NA	NA	NA	NA
AC006205.1	0.324446	1.47691	3.06753	0.481465	0.630186	NA
AC006205.2	0.480096	-0.81974	3.05298	-0.268505	0.788311	NA
AC006206.1	0	NA	NA	NA	NA	NA
AC006206.2	2.28447	0.978444	3.05145	0.320648	0.748477	NA
AC006207.1	13.2278	-1.08278	0.965053	-1.12199	0.261865	0.741803
AC006210.1	1.11753	-1.41813	3.0131	-0.470655	0.637887	NA
AC006210.2	8.46853	0.395962	0.914128	0.433159	0.664899	NA
AC006213.1	4.80967	1.28311	2.33942	0.548474	0.583366	NA
AC006213.2	28.8634	-0.906402	0.821818	-1.10292	0.270061	0.747459
AC006213.3	6.62571	-2.17632	1.20159	-1.8112	0.0701093	NA
AC006213.4	2.74356	1.6639	3.02806	0.549494	0.582666	NA
AC006213.5	1.57808	1.22116	3.01179	0.40546	0.685139	NA
AC006213.6	1.50209	0.159647	3.00008	0.0532144	0.957561	NA
AC006236.1	0	NA	NA	NA	NA	NA
AC006237.1	2.32738	-2.09983	1.66364	-1.26219	0.206879	NA
AC006238.1	21.4763	1.5186	1.18711	1.27924	0.200812	0.692624
AC006249.1	0.440617	0.982925	3.04921	0.322354	0.747184	NA
AC006252.1	35.6749	-1.76494	1.06349	-1.65957	0.0970005	0.568208
AC006254.1	7.25377	0.109122	1.10974	0.098331	0.921669	NA
AC006254.2	0	NA	NA	NA	NA	NA
AC006254.3	1.01844	1.17471	3.03954	0.386475	0.699145	NA
AC006262.1	0.404173	1.20196	3.06189	0.392555	0.694649	NA
AC006262.2	0	NA	NA	NA	NA	NA
AC006262.3	0	NA	NA	NA	NA	NA
AC006262.4	0	NA	NA	NA	NA	NA
AC006270.1	1.96386	-0.705561	2.50028	-0.282193	0.777796	NA
AC006270.2	0	NA	NA	NA	NA	NA
AC006270.3	0	NA	NA	NA	NA	NA
AC006272.1	0.186124	0.770398	3.07297	0.250701	0.802045	NA
AC006272.2	0	NA	NA	NA	NA	NA
AC006273.1	3.3358	0.123261	3.00398	0.0410324	0.96727	NA
AC006277.1	18.4725	-0.632121	1.3004	-0.486099	0.626897	0.910018
AC006288.1	0	NA	NA	NA	NA	NA
AC006296.1	0	NA	NA	NA	NA	NA
AC006296.2	0.259206	-0.182707	3.06198	-0.0596696	0.952419	NA
AC006299.1	74.1103	0.290546	0.704038	0.412685	0.679838	0.931643
AC006305.1	0	NA	NA	NA	NA	NA
AC006305.2	0	NA	NA	NA	NA	NA
AC006305.3	0	NA	NA	NA	NA	NA
AC006326.1	0	NA	NA	NA	NA	NA
AC006328.1	0	NA	NA	NA	NA	NA
AC006328.2	0	NA	NA	NA	NA	NA
AC006329.1	5.79936	1.64877	2.17342	0.758605	0.448089	NA
AC006329.2	0	NA	NA	NA	NA	NA
AC006330.1	13.1421	0.839772	1.2996	0.646177	0.518165	0.874131
AC006333.1	0	NA	NA	NA	NA	NA
AC006333.2	583.742	0.519786	0.326686	1.59109	0.11159	0.588632
AC006335.1	0	NA	NA	NA	NA	NA
AC006335.2	0	NA	NA	NA	NA	NA
AC006335.3	0	NA	NA	NA	NA	NA
AC006338.1	0	NA	NA	NA	NA	NA
AC006338.2	0	NA	NA	NA	NA	NA
AC006349.1	0.834881	-1.8588	3.02076	-0.61534	0.53833	NA
AC006355.1	0	NA	NA	NA	NA	NA
AC006355.2	0.155556	0.748806	3.0718	0.243768	0.807411	NA
AC006357.1	0	NA	NA	NA	NA	NA
AC006362.1	0	NA	NA	NA	NA	NA
AC006363.1	0	NA	NA	NA	NA	NA
AC006366.1	0	NA	NA	NA	NA	NA
AC006369.1	2.20176	-0.226699	3.05486	-0.0742095	0.940844	NA
AC006369.2	0	NA	NA	NA	NA	NA
AC006372.1	0.173989	0.734293	3.07109	0.239099	0.811029	NA
AC006372.2	1.24861	0.27938	3.03007	0.0922026	0.926537	NA
AC006372.3	0.599291	0.252099	3.04777	0.0827159	0.934077	NA
AC006372.4	0	NA	NA	NA	NA	NA
AC006378.1	8.8918	-1.37188	0.868074	-1.58038	0.11402	NA
AC006378.2	0	NA	NA	NA	NA	NA
AC006380.1	0	NA	NA	NA	NA	NA
AC006386.1	0	NA	NA	NA	NA	NA
AC006386.2	0.155556	0.748806	3.0718	0.243768	0.807411	NA
AC006387.1	6.11498	-2.15592	1.581	-1.36364	0.17268	NA
AC006390.1	0	NA	NA	NA	NA	NA
AC006427.1	0	NA	NA	NA	NA	NA
AC006435.1	0	NA	NA	NA	NA	NA
AC006435.2	19.6871	-0.279534	0.901442	-0.310097	0.756487	0.950196
AC006435.3	0	NA	NA	NA	NA	NA
AC006435.4	0.24418	0.307593	3.06986	0.100198	0.920187	NA
AC006435.5	1.42653	-0.654877	2.99046	-0.218989	0.826659	NA
AC006441.1	22.7912	-0.315029	1.14939	-0.274083	0.784021	0.95748
AC006441.2	0	NA	NA	NA	NA	NA
AC006441.3	0	NA	NA	NA	NA	NA
AC006441.4	0	NA	NA	NA	NA	NA
AC006441.5	0	NA	NA	NA	NA	NA
AC006445.1	0	NA	NA	NA	NA	NA
AC006445.2	0.507652	-0.222865	3.04161	-0.0732719	0.94159	NA
AC006449.1	0	NA	NA	NA	NA	NA
AC006449.2	0.250926	0.377987	3.06639	0.123268	0.901895	NA
AC006449.3	1.33407	1.13218	3.00298	0.377021	0.706158	NA
AC006449.5	6.13567	0.467871	3.05413	0.153193	0.878246	NA
AC006449.6	314.586	0.436507	0.456269	0.956686	0.338726	0.793289
AC006449.7	0	NA	NA	NA	NA	NA
AC006450.1	0	NA	NA	NA	NA	NA
AC006450.2	0	NA	NA	NA	NA	NA
AC006450.3	0	NA	NA	NA	NA	NA
AC006453.1	1.33752	0.195006	2.9917	0.0651825	0.948029	NA
AC006453.2	71.3843	-0.203012	0.474674	-0.427687	0.668879	0.926437
AC006453.3	0	NA	NA	NA	NA	NA
AC006453.4	0	NA	NA	NA	NA	NA
AC006453.5	0	NA	NA	NA	NA	NA
AC006455.1	0	NA	NA	NA	NA	NA
AC006455.2	0	NA	NA	NA	NA	NA
AC006455.3	0	NA	NA	NA	NA	NA
AC006455.4	0	NA	NA	NA	NA	NA
AC006455.5	0	NA	NA	NA	NA	NA
AC006455.6	0	NA	NA	NA	NA	NA
AC006455.7	0	NA	NA	NA	NA	NA
AC006455.8	0	NA	NA	NA	NA	NA
AC006457.1	0	NA	NA	NA	NA	NA
AC006458.1	0	NA	NA	NA	NA	NA
AC006460.1	2.27659	-1.25269	2.10185	-0.595991	0.551181	NA
AC006460.2	200.68	0.880703	0.541168	1.62741	0.10365	0.57828
AC006461.1	0	NA	NA	NA	NA	NA
AC006463.1	0.148325	0.808637	3.07547	0.262931	0.792604	NA
AC006466.1	0	NA	NA	NA	NA	NA
AC006480.1	4.63	0.0223965	2.09473	0.0106918	0.991469	NA
AC006480.2	6.61747	0.397822	1.28217	0.310273	0.756353	NA
AC006482.1	0.980659	0.691051	3.05748	0.22602	0.821186	NA
AC006483.1	72.5996	-0.63449	0.60843	-1.04283	0.297027	0.767551
AC006483.2	1.0694	-0.691053	3.03163	-0.227947	0.819687	NA
AC006484.1	0	NA	NA	NA	NA	NA
AC006486.1	0	NA	NA	NA	NA	NA
AC006486.2	21.2251	-1.02614	0.865876	-1.18509	0.235983	0.720847
AC006487.1	0	NA	NA	NA	NA	NA
AC006487.2	0	NA	NA	NA	NA	NA
AC006499.1	0	NA	NA	NA	NA	NA
AC006499.2	0	NA	NA	NA	NA	NA
AC006499.3	0	NA	NA	NA	NA	NA
AC006499.4	0	NA	NA	NA	NA	NA
AC006499.5	0	NA	NA	NA	NA	NA
AC006499.6	0	NA	NA	NA	NA	NA
AC006499.7	0	NA	NA	NA	NA	NA
AC006499.8	0	NA	NA	NA	NA	NA
AC006504.1	16.6804	-3.42957	1.55197	-2.20982	0.0271178	0.390684
AC006504.2	0	NA	NA	NA	NA	NA
AC006504.3	21.1912	-0.388623	0.855162	-0.454443	0.64951	0.919518
AC006504.4	0	NA	NA	NA	NA	NA
AC006504.5	199.142	-1.26553	0.500663	-2.5277	0.0114812	0.313957
AC006504.6	0.230086	-0.757257	3.06301	-0.247227	0.804733	NA
AC006504.7	0.162835	0.430842	3.07008	0.140336	0.888395	NA
AC006504.8	2.30275	-1.83449	2.87927	-0.637139	0.524034	NA
AC006509.1	0.311111	0.769813	3.0631	0.251318	0.801568	NA
AC006509.2	0	NA	NA	NA	NA	NA
AC006511.1	0.116111	-0.250329	3.07413	-0.0814307	0.935099	NA
AC006511.2	13.0111	-0.93596	1.01403	-0.92301	0.356002	0.801673
AC006511.3	1052.09	0.675695	0.293177	2.30473	0.0211817	0.369536
AC006511.4	1.10426	0.724237	2.8064	0.258067	0.796355	NA
AC006511.5	0.259206	-0.182707	3.06198	-0.0596696	0.952419	NA
AC006512.1	0.622222	0.781385	3.05845	0.255484	0.79835	NA
AC006512.2	0	NA	NA	NA	NA	NA
AC006517.1	0	NA	NA	NA	NA	NA
AC006518.1	0.224781	0.40414	3.05588	0.13225	0.894786	NA
AC006518.2	7.75059	0.519438	1.40752	0.369044	0.712095	NA
AC006518.7	0	NA	NA	NA	NA	NA
AC006529.1	1.61882	-0.687132	3.02359	-0.227257	0.820224	NA
AC006530.1	0	NA	NA	NA	NA	NA
AC006538.1	15.4879	-1.80067	0.951856	-1.89175	0.0585243	0.484364
AC006538.2	0	NA	NA	NA	NA	NA
AC006538.3	0.151845	-0.189283	3.07081	-0.0616396	0.95085	NA
AC006539.1	2.69504	0.204286	1.82401	0.111998	0.910825	NA
AC006539.2	2.84523	-1.28432	2.63165	-0.48803	0.625529	NA
AC006539.3	1.83756	1.12255	1.58194	0.709603	0.477951	NA
AC006547.1	109.048	-0.573338	0.657943	-0.871411	0.38353	0.814673
AC006547.2	0	NA	NA	NA	NA	NA
AC006547.3	0	NA	NA	NA	NA	NA
AC006548.1	0.0648016	-0.135173	3.08401	-0.0438304	0.96504	NA
AC006548.2	0	NA	NA	NA	NA	NA
AC006548.3	0.75362	-0.216505	3.056	-0.0708459	0.94352	NA
AC006557.1	0.259206	-0.182707	3.06198	-0.0596696	0.952419	NA
AC006557.2	0	NA	NA	NA	NA	NA
AC006557.3	0	NA	NA	NA	NA	NA
AC006557.4	0	NA	NA	NA	NA	NA
AC006557.5	2.3764	1.70268	3.00198	0.567185	0.570589	NA
AC006557.6	0.259206	-0.182707	3.06198	-0.0596696	0.952419	NA
AC006566.1	2.32582	0.21274	3.02729	0.0702739	0.943976	NA
AC006581.1	0.359689	-0.784735	3.05399	-0.256954	0.797214	NA
AC006581.2	7.41126	3.58131	1.36533	2.62304	0.00871482	NA
AC006600.1	0	NA	NA	NA	NA	NA
AC006600.2	0	NA	NA	NA	NA	NA
AC006840.1	0	NA	NA	NA	NA	NA
AC006924.1	0.932037	-0.269453	3.05707	-0.0881407	0.929765	NA
AC006927.1	3.79494	-1.06903	1.99865	-0.534874	0.592737	NA
AC006927.2	0	NA	NA	NA	NA	NA
AC006927.3	0	NA	NA	NA	NA	NA
AC006927.4	0	NA	NA	NA	NA	NA
AC006927.5	0.151845	-0.189283	3.07081	-0.0616396	0.95085	NA
AC006942.1	2.44695	-0.774387	1.27311	-0.608264	0.543013	NA
AC006946.1	4.1346	-0.144373	3.02627	-0.0477067	0.96195	NA
AC006946.2	2.31936	-2.06252	3.02163	-0.682587	0.494868	NA
AC006946.3	0.301448	-0.208255	3.05953	-0.0680676	0.945732	NA
AC006947.1	0	NA	NA	NA	NA	NA
AC006960.1	0.538608	0.176373	3.05758	0.0576839	0.954	NA
AC006960.2	2.73766	2.5205	2.77544	0.908144	0.363802	NA
AC006960.3	4.47345	-1.19415	2.95526	-0.404075	0.686158	NA
AC006963.1	0	NA	NA	NA	NA	NA
AC006965.1	0.155556	0.748806	3.0718	0.243768	0.807411	NA
AC006967.1	0	NA	NA	NA	NA	NA
AC006967.2	0	NA	NA	NA	NA	NA
AC006967.3	0.129603	-0.16561	3.06981	-0.053948	0.956977	NA
AC006970.1	53.3761	0.398554	0.460389	0.865689	0.386661	0.816027
AC006970.2	0	NA	NA	NA	NA	NA
AC006971.1	19.3781	-0.0496815	0.606292	-0.0819432	0.934692	0.989257
AC006974.1	0	NA	NA	NA	NA	NA
AC006974.2	0	NA	NA	NA	NA	NA
AC006978.1	457.759	0.548314	0.409594	1.33868	0.180676	0.67271
AC006978.2	0.495435	-0.115871	3.04371	-0.038069	0.969633	NA
AC006986.1	0	NA	NA	NA	NA	NA
AC006987.1	0	NA	NA	NA	NA	NA
AC006987.2	0	NA	NA	NA	NA	NA
AC006987.3	0	NA	NA	NA	NA	NA
AC006987.4	0	NA	NA	NA	NA	NA
AC006989.1	0	NA	NA	NA	NA	NA
AC006994.1	2.45292	-1.12309	3.04467	-0.368871	0.712224	NA
AC006994.2	5.02094	-0.360491	1.73426	-0.207865	0.835334	NA
AC007000.1	77.3736	0.331734	0.409521	0.810054	0.417909	0.830755
AC007000.2	2.12031	-0.0613868	2.98738	-0.0205487	0.983606	NA
AC007000.3	3.74586	-0.721427	1.62029	-0.445246	0.656142	NA
AC007001.1	0.8638	0.310825	3.03652	0.102362	0.918469	NA
AC007003.1	0.173989	0.734293	3.07109	0.239099	0.811029	NA
AC007009.1	0	NA	NA	NA	NA	NA
AC007012.1	0	NA	NA	NA	NA	NA
AC007012.2	0.129603	-0.16561	3.06981	-0.053948	0.956977	NA
AC007014.1	0	NA	NA	NA	NA	NA
AC007014.2	42.8365	0.152089	0.504415	0.301515	0.763022	0.952297
AC007016.1	0.116111	-0.250329	3.07413	-0.0814307	0.935099	NA
AC007029.1	2.00107	1.45234	1.78982	0.811446	0.41711	NA
AC007032.1	2.84955	0.271745	1.83748	0.14789	0.88243	NA
AC007036.1	8.06113	-0.206252	1.68646	-0.122299	0.902662	NA
AC007036.2	27.5126	0.870136	0.757474	1.14873	0.250666	0.733506
AC007036.3	0	NA	NA	NA	NA	NA
AC007038.1	26.0384	-2.4154	0.961723	-2.51154	0.0120207	0.31688
AC007038.2	4.60002	-1.75345	1.08008	-1.62344	0.104495	NA
AC007040.1	2.34548	-0.278935	2.17767	-0.128089	0.898078	NA
AC007040.2	13.2933	-3.73793	1.48514	-2.51689	0.0118395	0.316219
AC007041.1	102.486	0.230336	0.379169	0.607477	0.543534	0.882888
AC007064.1	0	NA	NA	NA	NA	NA
AC007064.2	0.148325	0.808637	3.07547	0.262931	0.792604	NA
AC007064.3	0	NA	NA	NA	NA	NA
AC007064.4	0	NA	NA	NA	NA	NA
AC007066.1	65.1486	0.885044	0.316148	2.79946	0.00511882	0.222536
AC007066.2	64.0941	0.667869	0.760518	0.878177	0.379848	0.81254
AC007068.1	0	NA	NA	NA	NA	NA
AC007068.2	0.794206	0.295431	3.04519	0.0970155	0.922714	NA
AC007091.1	2.88472	0.363873	3.00505	0.121087	0.903622	NA
AC007098.1	0	NA	NA	NA	NA	NA
AC007099.1	0	NA	NA	NA	NA	NA
AC007099.2	0	NA	NA	NA	NA	NA
AC007100.1	7.38154	0.881536	1.52967	0.57629	0.564419	NA
AC007106.1	0	NA	NA	NA	NA	NA
AC007114.1	60.6551	0.280668	0.614261	0.45692	0.647729	0.919008
AC007114.2	1.37529	0.548563	2.99923	0.182901	0.854875	NA
AC007115.1	0	NA	NA	NA	NA	NA
AC007126.1	0	NA	NA	NA	NA	NA
AC007128.1	1.62254	-0.0482238	2.68485	-0.0179615	0.98567	NA
AC007128.2	0	NA	NA	NA	NA	NA
AC007136.1	0	NA	NA	NA	NA	NA
AC007151.1	2.67731	-2.55094	2.73706	-0.931998	0.351337	NA
AC007159.1	0.38881	-0.188751	3.05924	-0.0616984	0.950803	NA
AC007160.1	0.656557	-1.60317	3.0494	-0.525732	0.599075	NA
AC007161.1	19.4542	0.478463	0.586731	0.815474	0.414801	0.829158
AC007161.2	0	NA	NA	NA	NA	NA
AC007161.3	0	NA	NA	NA	NA	NA
AC007163.1	1.79076	0.471843	1.62435	0.290481	0.771448	NA
AC007179.1	0.907222	-0.195893	3.05604	-0.0641002	0.94889	NA
AC007179.2	1.28246	0.419525	3.01138	0.139313	0.889203	NA
AC007179.3	0	NA	NA	NA	NA	NA
AC007182.1	0.388349	-0.25723	3.06176	-0.0840137	0.933046	NA
AC007182.2	133.24	0.535624	0.35039	1.52865	0.126351	0.608841
AC007191.1	7.65667	-0.673551	1.00967	-0.667099	0.504709	NA
AC007192.1	6.16203	2.1015	3.0247	0.69478	0.487193	NA
AC007192.2	0	NA	NA	NA	NA	NA
AC007193.1	0	NA	NA	NA	NA	NA
AC007193.2	0	NA	NA	NA	NA	NA
AC007193.3	0	NA	NA	NA	NA	NA
AC007204.1	2.54811	-2.36491	2.64033	-0.895689	0.370419	NA
AC007204.2	0	NA	NA	NA	NA	NA
AC007207.1	2.1088	0.425667	3.05485	0.139341	0.88918	NA
AC007207.2	0.151845	-0.189283	3.07081	-0.0616396	0.95085	NA
AC007215.1	0	NA	NA	NA	NA	NA
AC007216.1	21.3552	-0.0817356	1.24812	-0.0654871	0.947786	0.991381
AC007216.2	16.5066	-0.828056	1.11361	-0.743575	0.457133	0.848474
AC007216.3	42.9659	-0.314968	0.54119	-0.581992	0.560572	0.888934
AC007216.4	19.6199	0.471966	0.580365	0.813222	0.416091	0.829934
AC007216.5	0.769381	0.863846	3.02941	0.285153	0.775527	NA
AC007218.1	0	NA	NA	NA	NA	NA
AC007218.2	0	NA	NA	NA	NA	NA
AC007220.1	2.78671	-2.04839	2.00174	-1.0233	0.306165	NA
AC007221.1	0	NA	NA	NA	NA	NA
AC007221.2	0	NA	NA	NA	NA	NA
AC007223.1	0	NA	NA	NA	NA	NA
AC007224.1	0	NA	NA	NA	NA	NA
AC007224.2	1.98518	-0.339796	2.11228	-0.160867	0.872198	NA
AC007225.1	7.37281	0.955169	2.78466	0.343011	0.73159	NA
AC007225.2	0	NA	NA	NA	NA	NA
AC007228.1	0.0741626	0.654675	3.08237	0.212394	0.8318	NA
AC007228.2	16.2015	0.180404	0.57916	0.311492	0.755426	0.949949
AC007229.1	23.509	0.499411	0.500303	0.998218	0.318174	0.779963
AC007237.1	0	NA	NA	NA	NA	NA
AC007238.1	154.663	0.0312863	0.308357	0.101461	0.919184	0.986786
AC007240.1	37.2513	-1.14222	0.973933	-1.17279	0.240879	0.726284
AC007241.1	0	NA	NA	NA	NA	NA
AC007249.1	3.06014	0.0325758	2.02937	0.0160522	0.987193	NA
AC007249.2	25.6565	-0.274349	0.699027	-0.392473	0.694709	0.935082
AC007250.1	3.80703	-0.488383	1.43161	-0.341144	0.732995	NA
AC007253.1	0	NA	NA	NA	NA	NA
AC007255.1	16.3372	0.243043	1.0198	0.238324	0.81163	0.963459
AC007255.2	0	NA	NA	NA	NA	NA
AC007256.1	93.9394	0.0606361	0.394765	0.153601	0.877925	0.977361
AC007262.1	0	NA	NA	NA	NA	NA
AC007262.2	27.619	-1.77778	1.11518	-1.59416	0.1109	0.587182
AC007271.1	0.137992	-0.488248	3.07898	-0.158574	0.874004	NA
AC007272.1	0.91254	-0.413927	3.01906	-0.137105	0.890948	NA
AC007274.1	0	NA	NA	NA	NA	NA
AC007274.2	0	NA	NA	NA	NA	NA
AC007274.3	0	NA	NA	NA	NA	NA
AC007275.1	0	NA	NA	NA	NA	NA
AC007277.1	0.232223	-0.275758	3.06445	-0.0899861	0.928298	NA
AC007278.1	0.220357	0.351889	3.06561	0.114786	0.908615	NA
AC007278.2	6.1173	0.293616	3.03915	0.0966113	0.923035	NA
AC007279.1	1.39585	1.01875	3.02862	0.336374	0.736589	NA
AC007283.1	0	NA	NA	NA	NA	NA
AC007283.2	2.64989	0.922287	2.22261	0.414957	0.678173	NA
AC007285.1	141.085	1.3598	0.53941	2.52089	0.0117057	0.315056
AC007285.2	13.0764	0.00138814	1.24217	0.00111751	0.999108	0.999941
AC007292.1	10.5877	0.644216	0.875927	0.735468	0.462054	NA
AC007292.2	19.4918	0.734569	0.674606	1.08889	0.276204	0.752021
AC007292.3	0.768085	0.292938	3.03733	0.0964459	0.923166	NA
AC007298.1	4.68976	-0.176848	1.05973	-0.16688	0.867464	NA
AC007298.2	6.44892	0.320275	1.34255	0.238557	0.811449	NA
AC007308.1	0	NA	NA	NA	NA	NA
AC007312.1	0	NA	NA	NA	NA	NA
AC007314.1	1.68987	-0.669301	2.99676	-0.223342	0.82327	NA
AC007318.1	276.752	0.287029	0.279648	1.02639	0.304706	0.772652
AC007318.2	0.100483	-0.183074	3.07053	-0.0596229	0.952456	NA
AC007319.1	146.22	0.3507	0.589645	0.594764	0.552001	0.886199
AC007322.1	0	NA	NA	NA	NA	NA
AC007322.2	0	NA	NA	NA	NA	NA
AC007322.3	0	NA	NA	NA	NA	NA
AC007322.4	0	NA	NA	NA	NA	NA
AC007325.1	0	NA	NA	NA	NA	NA
AC007325.2	0	NA	NA	NA	NA	NA
AC007325.3	0	NA	NA	NA	NA	NA
AC007325.4	0	NA	NA	NA	NA	NA
AC007326.1	0	NA	NA	NA	NA	NA
AC007326.2	0.907222	-0.195893	3.05604	-0.0641002	0.94889	NA
AC007326.3	0	NA	NA	NA	NA	NA
AC007326.4	0	NA	NA	NA	NA	NA
AC007326.5	0.0776698	-0.126789	3.08331	-0.0411212	0.967199	NA
AC007327.1	0.980659	0.691051	3.05748	0.22602	0.821186	NA
AC007327.2	1.83873	0.694694	3.05567	0.227346	0.820155	NA
AC007333.1	0	NA	NA	NA	NA	NA
AC007333.2	0.495898	1.8812	3.05936	0.614899	0.538621	NA
AC007336.1	27.6022	-0.862671	0.954896	-0.903419	0.366304	0.806843
AC007336.2	1.93391	1.32879	3.0485	0.435882	0.662922	NA
AC007336.3	0.0759227	-0.138261	3.08423	-0.0448285	0.964244	NA
AC007342.1	13.6779	-1.45409	1.32632	-1.09633	0.272933	0.749546
AC007342.2	0.64538	-1.3448	3.04467	-0.441688	0.658715	NA
AC007342.3	50.2964	-2.45319	1.04345	-2.35105	0.0187208	0.357115
AC007342.4	10.7845	-1.139	2.89228	-0.393806	0.693724	NA
AC007342.5	7.60115	-1.63668	3.00436	-0.544771	0.585911	NA
AC007342.6	6.44249	-2.39097	1.3336	-1.79287	0.0729935	NA
AC007342.7	6.72527	-1.19127	1.83203	-0.650244	0.515535	NA
AC007342.8	1.11061	-0.389257	3.057	-0.127333	0.898677	NA
AC007342.9	2.0882	-1.09365	3.03345	-0.36053	0.718451	NA
AC007344.1	0.0502413	-0.140068	3.08437	-0.0454121	0.963779	NA
AC007346.1	0	NA	NA	NA	NA	NA
AC007346.2	0	NA	NA	NA	NA	NA
AC007347.1	1.40166	-0.517311	3.01518	-0.171569	0.863776	NA
AC007347.2	0	NA	NA	NA	NA	NA
AC007349.1	1.09904	-1.67619	2.83346	-0.59157	0.554139	NA
AC007349.2	1.33826	1.26992	3.0206	0.42042	0.674178	NA
AC007349.3	6.32677	-1.6403	2.96148	-0.55388	0.579661	NA
AC007349.4	3.74818	-1.50094	2.22785	-0.673718	0.500491	NA
AC007359.1	0	NA	NA	NA	NA	NA
AC007362.1	3.80005	0.696876	3.05459	0.22814	0.819537	NA
AC007363.1	0	NA	NA	NA	NA	NA
AC007364.1	2.48155	-0.111749	1.85553	-0.0602245	0.951977	NA
AC007365.1	37.7057	0.914488	0.715739	1.27768	0.201361	0.692624
AC007365.2	0.644628	1.49512	3.05051	0.490122	0.624048	NA
AC007368.1	0	NA	NA	NA	NA	NA
AC007368.2	0	NA	NA	NA	NA	NA
AC007370.1	1.86979	-0.294018	3.00832	-0.0977351	0.922143	NA
AC007370.2	4.48174	-2.57136	2.98841	-0.860442	0.389546	NA
AC007375.1	1.71189	1.7713	3.02094	0.586342	0.557646	NA
AC007375.2	0	NA	NA	NA	NA	NA
AC007375.3	0	NA	NA	NA	NA	NA
AC007376.1	0	NA	NA	NA	NA	NA
AC007376.2	0.29665	0.836469	3.06523	0.272889	0.784938	NA
AC007378.1	0.116111	-0.250329	3.07413	-0.0814307	0.935099	NA
AC007381.1	13.3397	-2.1348	2.22175	-0.960864	0.33662	0.791716
AC007382.1	30.1464	-2.33057	0.906287	-2.57156	0.010124	0.294099
AC007383.1	0.256038	0.302038	3.05338	0.0989194	0.921202	NA
AC007383.2	458.434	-0.207597	0.436229	-0.47589	0.634153	0.912498
AC007383.3	0	NA	NA	NA	NA	NA
AC007383.4	0.223884	-0.784888	3.06601	-0.255997	0.797954	NA
AC007384.1	455.438	0.547361	0.53788	1.01763	0.308856	0.774992
AC007386.1	0.788453	-0.927766	3.03939	-0.305248	0.760178	NA
AC007387.1	35.0999	0.459933	0.493952	0.931129	0.351787	0.798769
AC007388.1	236.808	0.113196	0.317153	0.356913	0.721157	0.943149
AC007389.1	3.13716	1.37978	1.8233	0.756749	0.4492	NA
AC007389.2	0	NA	NA	NA	NA	NA
AC007389.3	0.148325	0.808637	3.07547	0.262931	0.792604	NA
AC007389.4	0	NA	NA	NA	NA	NA
AC007389.5	1.29472	1.56592	3.03973	0.515152	0.606447	NA
AC007390.1	0	NA	NA	NA	NA	NA
AC007390.2	24.3166	-0.107141	0.977453	-0.109613	0.912716	0.984854
AC007391.1	3.09473	-0.199366	2.98181	-0.0668608	0.946693	NA
AC007394.1	0	NA	NA	NA	NA	NA
AC007395.1	4.65829	-0.728531	1.1341	-0.642388	0.520621	NA
AC007402.1	0.561358	-0.397945	3.03896	-0.130948	0.895817	NA
AC007403.1	0	NA	NA	NA	NA	NA
AC007405.1	0.232223	-0.275758	3.06445	-0.0899861	0.928298	NA
AC007405.2	0.266278	0.431626	3.06024	0.141043	0.887836	NA
AC007405.3	2.56073	0.188726	3.03449	0.0621938	0.950409	NA
AC007406.1	0.150724	-0.195251	3.06517	-0.0637	0.949209	NA
AC007406.2	0	NA	NA	NA	NA	NA
AC007406.3	12.2786	-3.64072	2.10431	-1.73012	0.083608	0.543268
AC007406.4	0	NA	NA	NA	NA	NA
AC007406.5	133.019	-2.41859	1.1566	-2.09113	0.0365167	0.416904
AC007422.1	0	NA	NA	NA	NA	NA
AC007422.2	0.150724	-0.195251	3.06517	-0.0637	0.949209	NA
AC007423.1	0	NA	NA	NA	NA	NA
AC007424.1	0	NA	NA	NA	NA	NA
AC007431.1	1.7761	-1.99026	3.02802	-0.65728	0.511001	NA
AC007431.2	4.07114	0.852952	2.98806	0.285453	0.775297	NA
AC007431.3	1.20468	1.55596	3.03976	0.51187	0.608742	NA
AC007435.1	0	NA	NA	NA	NA	NA
AC007448.1	0	NA	NA	NA	NA	NA
AC007448.2	3.05791	0.625471	2.98518	0.209525	0.834038	NA
AC007448.3	25.0838	0.410273	0.883912	0.464156	0.642536	0.916464
AC007450.1	0.777346	0.24982	3.037	0.0822587	0.934441	NA
AC007450.2	0	NA	NA	NA	NA	NA
AC007450.3	0.746613	1.42819	3.05347	0.467725	0.639981	NA
AC007450.4	0.815582	-0.500617	3.02802	-0.165328	0.868686	NA
AC007458.1	0	NA	NA	NA	NA	NA
AC007463.1	5.33732	-1.30229	1.93493	-0.673046	0.500918	NA
AC007485.1	0.0777778	0.671191	3.08376	0.217654	0.827699	NA
AC007485.2	37.3937	-0.27532	1.02974	-0.267368	0.789186	0.958072
AC007490.1	0	NA	NA	NA	NA	NA
AC007491.1	0	NA	NA	NA	NA	NA
AC007493.1	0.200965	-0.201643	3.06239	-0.0658451	0.947501	NA
AC007493.2	1.84771	2.56399	3.00139	0.854265	0.392958	NA
AC007494.1	2.16444	-0.725961	2.98928	-0.242854	0.808118	NA
AC007494.2	7.49238	-1.60593	1.26826	-1.26624	0.205426	NA
AC007494.3	14.6111	-2.94512	1.32045	-2.2304	0.0257209	0.388868
AC007495.1	1.28365	0.0236146	3.05559	0.00772833	0.993834	NA
AC007495.2	0.0648016	-0.135173	3.08401	-0.0438304	0.96504	NA
AC007496.1	7.15839	0.588105	2.26686	0.259437	0.795298	NA
AC007496.2	11.8169	-1.50457	0.903692	-1.66492	0.095929	0.566368
AC007496.3	9.98448	1.64785	2.67482	0.61606	0.537855	NA
AC007497.1	0.571648	-0.850987	3.05381	-0.278664	0.780503	NA
AC007513.1	0	NA	NA	NA	NA	NA
AC007527.1	0.260983	0.747178	3.06557	0.243732	0.807438	NA
AC007527.2	0	NA	NA	NA	NA	NA
AC007529.1	1.81862	-0.929369	3.04613	-0.305099	0.760291	NA
AC007529.2	1.25609	1.18542	3.01555	0.393102	0.694244	NA
AC007533.1	10.2408	-0.387689	1.4856	-0.260965	0.79412	NA
AC007536.1	0	NA	NA	NA	NA	NA
AC007537.1	173.603	0.307175	0.347135	0.884886	0.376218	0.81083
AC007537.2	2.93377	0.723408	1.55018	0.466659	0.640744	NA
AC007540.1	1.0744	0.822953	3.03205	0.271418	0.78607	NA
AC007541.1	59.5317	-0.873234	1.05316	-0.829154	0.407017	0.824806
AC007546.1	7.14485	1.50133	1.349	1.11293	0.26574	NA
AC007546.2	0.315522	0.842236	3.05749	0.275466	0.782958	NA
AC007547.1	5.40211	1.00536	1.06288	0.945881	0.344209	NA
AC007547.2	0.370204	-0.369171	3.0634	-0.12051	0.904079	NA
AC007551.1	0.677796	-0.938655	3.03734	-0.309038	0.757293	NA
AC007551.2	0	NA	NA	NA	NA	NA
AC007552.1	0	NA	NA	NA	NA	NA
AC007552.2	0.129603	-0.16561	3.06981	-0.053948	0.956977	NA
AC007556.1	3.48255	0.261217	3.052	0.0855887	0.931793	NA
AC007557.1	0	NA	NA	NA	NA	NA
AC007557.2	0	NA	NA	NA	NA	NA
AC007557.3	0.250926	0.377987	3.06639	0.123268	0.901895	NA
AC007557.4	0	NA	NA	NA	NA	NA
AC007559.1	0	NA	NA	NA	NA	NA
AC007560.1	28.9359	0.349065	0.47509	0.734735	0.462501	0.850481
AC007562.1	0.700435	0.121175	3.02854	0.0400109	0.968084	NA
AC007563.1	0.0869944	0.675388	3.08409	0.218991	0.826657	NA
AC007563.2	0	NA	NA	NA	NA	NA
AC007563.3	0	NA	NA	NA	NA	NA
AC007566.1	5.74273	-0.0878768	1.03128	-0.0852115	0.932093	NA
AC007566.2	0	NA	NA	NA	NA	NA
AC007568.1	0	NA	NA	NA	NA	NA
AC007569.1	5.13772	3.00566	1.78712	1.68185	0.0925989	NA
AC007570.1	1.12016	-1.85615	3.02634	-0.613331	0.539657	NA
AC007595.1	0	NA	NA	NA	NA	NA
AC007598.1	1.42057	-0.576736	3.0317	-0.190235	0.849125	NA
AC007598.2	1.011	0.313626	3.05592	0.102629	0.918257	NA
AC007598.3	5.29408	-1.13457	3.00917	-0.377039	0.706145	NA
AC007599.1	0	NA	NA	NA	NA	NA
AC007599.2	0.423526	-1.30946	3.05672	-0.428385	0.668371	NA
AC007601.1	4.93297	-2.26125	1.44714	-1.56256	0.118155	NA
AC007601.2	0	NA	NA	NA	NA	NA
AC007603.1	0	NA	NA	NA	NA	NA
AC007603.2	0	NA	NA	NA	NA	NA
AC007603.3	0	NA	NA	NA	NA	NA
AC007608.1	0	NA	NA	NA	NA	NA
AC007608.2	0	NA	NA	NA	NA	NA
AC007608.3	15.2556	2.2855	1.72391	1.32576	0.184919	0.676628
AC007608.4	13.028	0.613776	2.15984	0.284176	0.776275	0.956201
AC007610.1	1.56513	3.08058	3.0167	1.02117	0.307172	NA
AC007610.2	1.59062	-1.67549	3.0145	-0.555809	0.578341	NA
AC007610.3	0.583214	-0.192884	3.05739	-0.063088	0.949696	NA
AC007610.4	0	NA	NA	NA	NA	NA
AC007611.1	39.8663	0.546186	0.540381	1.01074	0.31214	0.777563
AC007613.1	103.366	0.877712	0.507895	1.72814	0.0839636	0.543735
AC007614.1	2.82186	0.721886	2.89437	0.249411	0.803043	NA
AC007614.2	0	NA	NA	NA	NA	NA
AC007618.1	0	NA	NA	NA	NA	NA
AC007619.1	3.23467	-0.518979	2.06145	-0.251755	0.801231	NA
AC007619.2	1.95406	0.224889	3.03283	0.0741516	0.94089	NA
AC007620.1	0.243226	0.0821755	3.06648	0.026798	0.978621	NA
AC007620.2	0	NA	NA	NA	NA	NA
AC007620.3	1.68363	-0.563198	3.01969	-0.186509	0.852046	NA
AC007621.1	1.06357	0.16389	3.02203	0.0542318	0.95675	NA
AC007622.1	0	NA	NA	NA	NA	NA
AC007622.2	67.151	-0.30357	0.800455	-0.379246	0.704505	0.938784
AC007631.1	0	NA	NA	NA	NA	NA
AC007637.1	19.1351	0.457767	0.856472	0.53448	0.59301	0.898318
AC007638.1	0	NA	NA	NA	NA	NA
AC007638.2	2.36206	0.171568	3.03222	0.0565816	0.954879	NA
AC007639.1	0.589866	0.204321	3.05849	0.0668048	0.946737	NA
AC007652.1	0	NA	NA	NA	NA	NA
AC007655.1	0	NA	NA	NA	NA	NA
AC007656.1	1.30702	-0.386448	3.03196	-0.127458	0.898578	NA
AC007656.2	0	NA	NA	NA	NA	NA
AC007663.1	21.0574	-0.210047	0.574092	-0.365876	0.714457	0.94192
AC007663.2	1.045	-0.298489	3.05611	-0.0976697	0.922195	NA
AC007663.3	3.9668	0.750956	2.46913	0.304138	0.761023	NA
AC007663.4	10.7279	-1.31315	1.23604	-1.06239	0.288059	NA
AC007666.1	0	NA	NA	NA	NA	NA
AC007671.1	0	NA	NA	NA	NA	NA
AC007673.1	1.10229	0.893864	3.03218	0.294793	0.768152	NA
AC007677.1	0	NA	NA	NA	NA	NA
AC007679.1	0.361276	0.12253	3.05393	0.0401223	0.967996	NA
AC007679.2	0	NA	NA	NA	NA	NA
AC007681.1	10.3546	-1.57281	2.996	-0.52497	0.599604	NA
AC007683.1	152.598	0.746345	0.268984	2.77468	0.00552552	0.226646
AC007683.2	0	NA	NA	NA	NA	NA
AC007684.1	17.8113	1.59199	0.827588	1.92366	0.0543977	0.47293
AC007685.1	12.3691	-0.204863	0.6718	-0.304947	0.760407	0.951744
AC007686.1	0.173989	0.734293	3.07109	0.239099	0.811029	NA
AC007686.2	0.0951778	0.814172	3.07589	0.264695	0.791244	NA
AC007686.3	103.643	-0.0232943	0.530547	-0.0439062	0.964979	0.994597
AC007687.1	0	NA	NA	NA	NA	NA
AC007688.1	572.392	0.948656	0.392212	2.41873	0.0155746	0.334389
AC007688.2	0.544445	0.779694	3.05913	0.254874	0.79882	NA
AC007690.1	0.268969	0.275747	3.05864	0.0901536	0.928165	NA
AC007718.1	0	NA	NA	NA	NA	NA
AC007728.1	40.7483	0.605752	0.872387	0.694361	0.487456	0.860794
AC007728.2	47.9507	0.183626	0.660305	0.278092	0.780941	0.956807
AC007728.3	6.9196	0.91287	2.40158	0.380113	0.703861	NA
AC007731.1	4.84115	-0.443451	1.5304	-0.289761	0.771999	NA
AC007731.2	28.3973	0.42899	0.650473	0.659505	0.509571	0.870394
AC007731.3	8.79353	0.81323	1.1881	0.684482	0.493671	NA
AC007731.4	5.7185	-0.716051	1.92109	-0.372731	0.709349	NA
AC007731.5	0	NA	NA	NA	NA	NA
AC007738.1	0	NA	NA	NA	NA	NA
AC007741.1	0	NA	NA	NA	NA	NA
AC007742.1	0	NA	NA	NA	NA	NA
AC007742.2	0	NA	NA	NA	NA	NA
AC007743.1	0.911072	-0.222382	3.05665	-0.0727534	0.942002	NA
AC007744.1	0	NA	NA	NA	NA	NA
AC007749.1	0	NA	NA	NA	NA	NA
AC007750.1	1.10643	0.968013	3.02435	0.320074	0.748912	NA
AC007751.1	0	NA	NA	NA	NA	NA
AC007751.2	0.194405	-0.176843	3.06465	-0.0577042	0.953984	NA
AC007773.1	24.8837	0.0842624	1.31709	0.0639764	0.948989	0.991409
AC007780.1	9.89505	0.500828	0.976401	0.512932	0.607999	NA
AC007785.1	0.614802	0.296248	3.03886	0.0974865	0.92234	NA
AC007785.2	0	NA	NA	NA	NA	NA
AC007785.3	0.174167	-0.26686	3.0678	-0.0869875	0.930681	NA
AC007786.1	10.3219	-1.44174	1.35246	-1.06601	0.286419	NA
AC007786.2	0.562969	0.881769	3.05887	0.288266	0.773143	NA
AC007786.3	0	NA	NA	NA	NA	NA
AC007787.1	0	NA	NA	NA	NA	NA
AC007787.2	13.2089	-2.1682	1.60629	-1.34982	0.177074	0.670854
AC007790.1	3.58306	-0.638992	3.00218	-0.212842	0.83145	NA
AC007792.1	1.31838	-1.3674	3.0133	-0.453789	0.649981	NA
AC007795.1	0	NA	NA	NA	NA	NA
AC007823.1	4.36231	-3.3208	2.32679	-1.4272	0.153522	NA
AC007834.1	1.44003	1.20227	3.01194	0.399167	0.68977	NA
AC007834.2	0.997002	1.47621	3.04085	0.485457	0.627352	NA
AC007842.1	8.61943	-0.274769	1.28589	-0.21368	0.830797	NA
AC007846.1	4.87639	-0.0801201	3.0542	-0.0262328	0.979072	NA
AC007846.2	0	NA	NA	NA	NA	NA
AC007848.1	0	NA	NA	NA	NA	NA
AC007848.2	0	NA	NA	NA	NA	NA
AC007849.1	0	NA	NA	NA	NA	NA
AC007849.2	42.1783	0.107303	0.374968	0.286166	0.774751	0.955714
AC007861.1	0	NA	NA	NA	NA	NA
AC007861.2	0.370204	-0.369171	3.0634	-0.12051	0.904079	NA
AC007876.1	0	NA	NA	NA	NA	NA
AC007878.1	46.6251	-0.389988	1.05576	-0.36939	0.711837	0.94118
AC007879.1	0.174167	-0.26686	3.0678	-0.0869875	0.930681	NA
AC007879.2	3.40191	0.260565	2.98374	0.0873285	0.93041	NA
AC007879.3	2.68746	0.538994	3.0054	0.179342	0.85767	NA
AC007879.4	0	NA	NA	NA	NA	NA
AC007881.1	28.0935	-0.227397	0.607626	-0.374238	0.708227	0.940063
AC007881.2	0.490329	0.683447	3.06127	0.223256	0.823336	NA
AC007881.3	45.7914	0.826781	0.698862	1.18304	0.236794	0.721159
AC007899.1	3.41859	-1.76952	2.14447	-0.825153	0.409285	NA
AC007906.1	0.713945	0.314126	3.04533	0.10315	0.917844	NA
AC007906.2	0.27237	0.421594	3.04995	0.13823	0.890059	NA
AC007907.1	0	NA	NA	NA	NA	NA
AC007908.1	0	NA	NA	NA	NA	NA
AC007919.1	2.52414	1.9637	2.49472	0.787141	0.431199	NA
AC007919.2	1.05833	0.214664	3.05685	0.070224	0.944015	NA
AC007920.1	0.518413	-0.191843	3.05785	-0.0627377	0.949975	NA
AC007920.2	0.112594	0.829672	3.07712	0.269626	0.787448	NA
AC007922.1	1.23512	-1.318	3.02203	-0.436132	0.662741	NA
AC007922.2	0.398575	-0.729239	3.06047	-0.238277	0.811666	NA
AC007922.3	0	NA	NA	NA	NA	NA
AC007923.1	1.01932	0.30075	3.03152	0.0992076	0.920973	NA
AC007923.2	0.232223	-0.275758	3.06445	-0.0899861	0.928298	NA
AC007923.3	0.544445	0.779694	3.05913	0.254874	0.79882	NA
AC007923.4	0.129603	-0.16561	3.06981	-0.053948	0.956977	NA
AC007938.1	0	NA	NA	NA	NA	NA
AC007938.2	2.07641	-0.335329	2.86664	-0.116976	0.906879	NA
AC007938.3	6.95352	-0.599935	1.27853	-0.46924	0.638898	NA
AC007948.1	0.0777778	0.671191	3.08376	0.217654	0.827699	NA
AC007950.1	0.246803	-0.355591	3.06787	-0.115908	0.907725	NA
AC007950.2	12.9573	-0.749546	1.609	-0.465844	0.641327	0.915796
AC007952.1	0	NA	NA	NA	NA	NA
AC007952.2	1.88994	1.18849	1.64458	0.722667	0.469884	NA
AC007952.3	0	NA	NA	NA	NA	NA
AC007952.4	221.918	0.873684	0.538111	1.62361	0.104459	0.57836
AC007952.5	0	NA	NA	NA	NA	NA
AC007952.6	0.752874	0.946513	3.02276	0.313129	0.754183	NA
AC007952.7	0.206382	0.644387	3.06739	0.210077	0.833608	NA
AC007952.8	0	NA	NA	NA	NA	NA
AC007952.9	0	NA	NA	NA	NA	NA
AC007953.1	0.200965	-0.201643	3.06239	-0.0658451	0.947501	NA
AC007953.2	2.40098	-1.0256	2.9931	-0.342657	0.731857	NA
AC007954.1	0.0580557	-0.120936	3.08282	-0.0392291	0.968708	NA
AC007956.1	0.777619	-0.194985	3.05644	-0.0637948	0.949134	NA
AC007966.1	1.11357	-0.899207	3.03894	-0.295895	0.767311	NA
AC007967.1	0	NA	NA	NA	NA	NA
AC007967.2	0	NA	NA	NA	NA	NA
AC007967.3	0	NA	NA	NA	NA	NA
AC007967.4	0	NA	NA	NA	NA	NA
AC007969.1	1953.2	0.467518	0.307197	1.52188	0.128038	0.61026
AC007969.2	0	NA	NA	NA	NA	NA
AC007991.1	0	NA	NA	NA	NA	NA
AC007991.2	0	NA	NA	NA	NA	NA
AC007991.3	0	NA	NA	NA	NA	NA
AC007991.4	0	NA	NA	NA	NA	NA
AC007992.1	1.68516	0.359689	3.03879	0.118366	0.905778	NA
AC007992.2	0.542897	-0.30822	3.05884	-0.100764	0.919738	NA
AC007993.1	0	NA	NA	NA	NA	NA
AC007993.2	0.819672	-0.89565	3.05191	-0.293472	0.769161	NA
AC007993.3	50.2353	0.24982	1.08095	0.231113	0.817227	0.965364
AC007996.1	7.78962	0.8557	1.595	0.53649	0.59162	NA
AC007998.1	0	NA	NA	NA	NA	NA
AC007998.2	0	NA	NA	NA	NA	NA
AC007998.3	11.8617	-0.774238	1.65611	-0.467503	0.64014	0.91527
AC007998.4	0.370204	-0.369171	3.0634	-0.12051	0.904079	NA
AC007998.5	1.02805	1.77904	3.04537	0.584177	0.559101	NA
AC008011.1	0.622222	0.781385	3.05845	0.255484	0.79835	NA
AC008011.2	0.116111	-0.250329	3.07413	-0.0814307	0.935099	NA
AC008013.1	3.98046	-3.29272	1.58929	-2.07181	0.0382828	NA
AC008013.2	1.24234	1.3059	3.02939	0.431078	0.666412	NA
AC008013.3	1.74988	-0.723727	3.03141	-0.238743	0.811305	NA
AC008014.1	186.201	0.206321	0.473979	0.435296	0.663348	0.924854
AC008015.1	0	NA	NA	NA	NA	NA
AC008026.1	139.52	1.03334	0.471166	2.19315	0.0282964	0.394246
AC008026.2	0.303592	0.3056	3.05244	0.100117	0.920252	NA
AC008026.3	25.8939	0.881292	1.26615	0.696041	0.486403	0.860665
AC008033.1	5.13734	0.334287	0.893176	0.374268	0.708205	NA
AC008033.2	0	NA	NA	NA	NA	NA
AC008033.3	2.2476	-0.0972741	3.05435	-0.0318477	0.974594	NA
AC008035.1	86.7084	-0.0573647	0.545753	-0.105111	0.916288	0.985823
AC008038.1	2185.54	0.420252	0.285729	1.47081	0.141344	0.630299
AC008040.1	7.41393	-1.61206	2.11676	-0.761573	0.446315	NA
AC008040.2	0.245165	0.669005	3.06854	0.218021	0.827413	NA
AC008040.3	0	NA	NA	NA	NA	NA
AC008040.4	0	NA	NA	NA	NA	NA
AC008040.5	0	NA	NA	NA	NA	NA
AC008050.1	0.735494	0.688486	3.05875	0.225087	0.821911	NA
AC008055.1	3.50663	-1.31745	1.90642	-0.691062	0.489526	NA
AC008056.1	0	NA	NA	NA	NA	NA
AC008056.2	0	NA	NA	NA	NA	NA
AC008060.1	0	NA	NA	NA	NA	NA
AC008060.2	0	NA	NA	NA	NA	NA
AC008060.3	0	NA	NA	NA	NA	NA
AC008060.4	0	NA	NA	NA	NA	NA
AC008063.1	0.683304	-0.219979	3.05765	-0.0719438	0.942647	NA
AC008063.2	0	NA	NA	NA	NA	NA
AC008065.1	5.83435	-0.310553	0.874661	-0.355056	0.722548	NA
AC008066.1	1.31716	-1.19507	3.00113	-0.398205	0.690479	NA
AC008067.1	0.129603	-0.16561	3.06981	-0.053948	0.956977	NA
AC008069.1	0	NA	NA	NA	NA	NA
AC008072.1	0	NA	NA	NA	NA	NA
AC008073.1	1.76455	0.335186	3.02869	0.11067	0.911878	NA
AC008073.2	0.663541	-0.310863	3.05791	-0.101659	0.919027	NA
AC008073.3	0.226008	0.120328	3.06456	0.0392645	0.96868	NA
AC008074.1	6.22275	0.392517	2.27451	0.172572	0.862988	NA
AC008074.2	0.186124	0.770398	3.07297	0.250701	0.802045	NA
AC008074.3	158.17	-0.192754	0.363746	-0.529915	0.596171	0.89996
AC008079.1	5.72747	-0.937069	1.56784	-0.597682	0.550052	NA
AC008079.2	36.5688	1.07656	0.770025	1.39808	0.162089	0.657126
AC008080.1	0	NA	NA	NA	NA	NA
AC008080.2	0	NA	NA	NA	NA	NA
AC008080.3	0	NA	NA	NA	NA	NA
AC008080.4	0	NA	NA	NA	NA	NA
AC008083.1	0	NA	NA	NA	NA	NA
AC008083.2	1.20835	-1.94441	3.03903	-0.639812	0.522295	NA
AC008083.3	0	NA	NA	NA	NA	NA
AC008088.1	0	NA	NA	NA	NA	NA
AC008103.1	0.311111	0.769813	3.0631	0.251318	0.801568	NA
AC008105.1	7.4822	0.517757	1.4291	0.362296	0.717131	NA
AC008105.2	22.7085	-1.02308	0.851369	-1.20169	0.229483	0.714714
AC008105.3	827.424	0.596449	0.425898	1.40045	0.161378	0.656306
AC008109.1	0	NA	NA	NA	NA	NA
AC008114.1	0	NA	NA	NA	NA	NA
AC008115.1	26.7615	0.587258	0.491116	1.19576	0.231789	0.716792
AC008115.2	0.246803	-0.355591	3.06787	-0.115908	0.907725	NA
AC008115.3	43.3148	1.25646	0.465552	2.69885	0.00695787	0.252616
AC008115.4	0.561945	0.00273297	3.05772	0.000893793	0.999287	NA
AC008121.1	0	NA	NA	NA	NA	NA
AC008121.2	0.92889	-0.297624	3.05642	-0.0973765	0.922427	NA
AC008121.3	0.605931	1.52037	3.05524	0.497627	0.618747	NA
AC008124.1	3696.31	0.00930788	0.317993	0.0292707	0.976649	0.996706
AC008125.1	0	NA	NA	NA	NA	NA
AC008126.1	26.9431	0.645033	0.612658	1.05284	0.292413	0.764253
AC008127.1	0.129603	-0.16561	3.06981	-0.053948	0.956977	NA
AC008127.2	0	NA	NA	NA	NA	NA
AC008132.1	0.837857	-0.432976	3.01702	-0.143511	0.885886	NA
AC008132.2	0	NA	NA	NA	NA	NA
AC008133.1	0	NA	NA	NA	NA	NA
AC008133.2	0.0648016	-0.135173	3.08401	-0.0438304	0.96504	NA
AC008134.1	0	NA	NA	NA	NA	NA
AC008147.1	0	NA	NA	NA	NA	NA
AC008147.2	0.943497	0.396031	3.04184	0.130195	0.896412	NA
[truncated: 54,858 more rows]
