# Supplementary material for: Molecular profiling of pre- and post- 5-azacytidine myelodysplastic syndrome samples identifies predictors of response
Source: Front Oncol. 2024 Sep 23;14:1438052. doi: 10.3389/fonc.2024.1438052 (PMC11456566; doi:10.3389/fonc.2024.1438052)
Supplement: Supplementary Table 8 — List of genes differentially expressed between pre- and post-treatment hematological responders (HEM-R). [file Table8.xlsx]

## Sheet: Sheet1
Supplementary Table 8. List of genes differentially expressed between pre and post-treatment hematological responders
ENSG	Gene	baseMean	log2FoldChange_HEM-R_pre_vs_post	lfcSE	stat	pvalue	padj
ENSG00000000003	TSPAN6	159.085	-0.404804	0.844793	-0.479175	0.631814	0.893637
ENSG00000000005	TNMD	8.39926	-0.0947594	2.97297	-0.0318737	0.974573	0.994667
ENSG00000000419	DPM1	3769.52	0.284114	0.310538	0.914908	0.36024	0.767187
ENSG00000000457	SCYL3	591.705	0.305266	0.316814	0.963551	0.335271	0.751498
ENSG00000000460	C1orf112	937.862	-0.470461	0.329079	-1.42963	0.152823	0.597719
ENSG00000000938	FGR	3659.78	-0.866024	0.476288	-1.81828	0.0690215	0.482123
ENSG00000000971	CFH	612.871	-0.64579	0.501257	-1.28834	0.197628	0.640175
ENSG00000001036	FUCA2	2550.31	-0.190847	0.369388	-0.516658	0.605395	0.88346
ENSG00000001084	GCLC	1816.77	-0.155297	0.319432	-0.486165	0.62685	0.891625
ENSG00000001167	NFYA	1672.38	-0.910769	0.333843	-2.72813	0.00636941	0.202064
ENSG00000001460	STPG1	392.122	-0.10253	0.596817	-0.171796	0.863598	0.970515
ENSG00000001461	NIPAL3	1385.26	-0.72723	0.436872	-1.66463	0.0959868	0.520691
ENSG00000001497	LAS1L	4471.45	-0.30611	0.188044	-1.62787	0.103553	0.532621
ENSG00000001561	ENPP4	1833.53	-0.101031	0.342613	-0.294883	0.768083	0.942421
ENSG00000001617	SEMA3F	192.564	-0.577272	0.697107	-0.828096	0.407616	0.792391
ENSG00000001626	CFTR	12.0676	2.18721	2.2918	0.954363	0.3399	0.752841
ENSG00000001629	ANKIB1	444.689	0.0938046	0.241245	0.388836	0.697398	0.918287
ENSG00000001630	CYP51A1	130.661	-0.130767	0.284349	-0.459881	0.645602	0.898426
ENSG00000001631	KRIT1	688.518	-0.0262006	0.271237	-0.0965967	0.923047	0.982948
ENSG00000002016	RAD52	249.584	0.276194	0.276062	1.00048	0.31708	0.738131
ENSG00000002079	MYH16	0.558722	-0.0735448	3.02356	-0.0243239	0.980594	NA
ENSG00000002330	BAD	954.173	0.264354	0.140299	1.88422	0.0595349	0.464136
ENSG00000002549	LAP3	8926.79	-0.08979	0.353191	-0.254225	0.799322	0.951284
ENSG00000002586	CD99	25951.1	0.431298	0.24492	1.76098	0.0782421	0.494843
ENSG00000002587	HS3ST1	519.311	1.07353	0.846947	1.26753	0.204967	0.645793
ENSG00000002726	AOC1	128.803	-0.743599	0.895652	-0.830232	0.406408	0.792223
ENSG00000002745	WNT16	0	NA	NA	NA	NA	NA
ENSG00000002746	HECW1	0.463595	0.455109	3.02413	0.150492	0.880376	NA
ENSG00000002822	MAD1L1	2786.03	-0.349359	0.289386	-1.20724	0.227338	0.665374
ENSG00000002834	LASP1	4700.53	-0.22536	0.233258	-0.966139	0.333975	0.750761
ENSG00000002919	SNX11	1691.61	0.428785	0.269093	1.59345	0.111059	0.542613
ENSG00000002933	TMEM176A	438.678	0.306003	0.68957	0.443759	0.657217	0.903408
ENSG00000003056	M6PR	6811.13	-0.00554562	0.199664	-0.0277748	0.977842	0.995712
ENSG00000003096	KLHL13	648.186	-3.21025	0.891505	-3.60093	0.000317077	0.0388745
ENSG00000003137	CYP26B1	0.233459	0.42817	3.03679	0.140994	0.887875	NA
ENSG00000003147	ICA1	1903.67	-0.180989	0.270821	-0.668297	0.503944	0.841536
ENSG00000003249	DBNDD1	61.9	-2.86455	1.27439	-2.24779	0.0245895	0.349488
ENSG00000003393	ALS2	1672.89	0.112513	0.345849	0.325324	0.744936	0.936283
ENSG00000003400	CASP10	918.193	-0.224065	0.368529	-0.607999	0.543188	0.860101
ENSG00000003402	CFLAR	3884.27	0.350503	0.312417	1.12191	0.261901	0.694139
ENSG00000003436	TFPI	7110	0.582881	0.417836	1.395	0.163016	0.609197
ENSG00000003509	NDUFAF7	720.902	-0.0976948	0.268289	-0.364141	0.715753	0.925009
ENSG00000003756	RBM5	2476.4	0.517381	0.351417	1.47227	0.140948	0.58375
ENSG00000003987	MTMR7	58.4143	1.05714	0.554038	1.90806	0.0563832	0.456494
ENSG00000003989	SLC7A2	19.6125	0.978985	3.00201	0.32611	0.744341	0.93624
ENSG00000004059	ARF5	5613.82	0.090173	0.248034	0.363551	0.716194	0.925199
ENSG00000004139	SARM1	319.601	-0.478732	0.267402	-1.79031	0.0734041	0.48901
ENSG00000004142	POLDIP2	10144.2	-0.22967	0.17281	-1.32903	0.183837	0.627495
ENSG00000004399	PLXND1	4565.08	-0.453708	0.367061	-1.23606	0.216437	0.655672
ENSG00000004455	AK2	20267.1	-0.0678979	0.274375	-0.247464	0.804549	0.95266
ENSG00000004468	CD38	4948.74	-1.25887	0.440805	-2.85583	0.00429239	0.172774
ENSG00000004478	FKBP4	8639.05	-0.695194	0.361432	-1.92344	0.0544245	0.450209
ENSG00000004487	KDM1A	11727.5	-0.202962	0.308413	-0.658085	0.510484	0.845036
ENSG00000004534	RBM6	2532.45	-0.196794	0.305347	-0.644493	0.519256	0.848035
ENSG00000004660	CAMKK1	292.847	0.389115	0.456706	0.852004	0.394212	0.785784
ENSG00000004700	RECQL	1260.27	-0.363332	0.229224	-1.58505	0.112954	0.546776
ENSG00000004766	VPS50	509.664	-0.815073	0.609046	-1.33828	0.180806	0.625231
ENSG00000004776	HSPB6	38.6917	-1.06213	0.589053	-1.80311	0.0713708	0.485757
ENSG00000004777	ARHGAP33	269.653	0.528306	0.408198	1.29424	0.195582	0.638539
ENSG00000004779	NDUFAB1	4050.37	-0.197974	0.230599	-0.858519	0.390606	0.783093
ENSG00000004799	PDK4	739.005	-1.04803	0.876038	-1.19633	0.231569	0.668291
ENSG00000004809	SLC22A16	1032.8	-0.44173	0.43807	-1.00835	0.313284	0.734938
ENSG00000004838	ZMYND10	38.2824	-1.68837	0.971617	-1.73769	0.0822655	0.499221
ENSG00000004846	ABCB5	0.919979	-0.0362031	3.03792	-0.0119171	0.990492	NA
ENSG00000004848	ARX	1.39419	-1.4436	3.00741	-0.480015	0.631217	NA
ENSG00000004864	SLC25A13	1634.07	-0.245758	0.407042	-0.603766	0.545999	0.861178
ENSG00000004866	ST7	2226.18	-0.474143	0.227651	-2.08277	0.0372723	0.396459
ENSG00000004897	CDC27	2228.98	0.451438	0.242201	1.8639	0.0623357	0.469647
ENSG00000004939	SLC4A1	321.784	0.171585	0.698292	0.245721	0.805898	0.952668
ENSG00000004948	CALCR	0.0658835	0.71056	3.05963	0.232237	0.816354	NA
ENSG00000004961	HCCS	1716.73	0.406527	0.2184	1.86139	0.0626893	0.469921
ENSG00000004975	DVL2	3965.59	-0.174407	0.299875	-0.5816	0.560836	0.867193
ENSG00000005001	PRSS22	1.2695	-0.377284	3.00589	-0.125515	0.900116	NA
ENSG00000005007	UPF1	4013.45	-0.411604	0.248593	-1.65574	0.0977748	0.524628
ENSG00000005020	SKAP2	4676.1	-0.493573	0.472349	-1.04493	0.296054	0.720667
ENSG00000005022	SLC25A5	20570.5	0.0404338	0.29277	0.138108	0.890155	0.976523
ENSG00000005059	MCUB	2629.43	-0.346739	0.521655	-0.66469	0.506249	0.843008
ENSG00000005073	HOXA11	30.5028	-0.310926	3.00536	-0.103457	0.9176	0.981366
ENSG00000005075	POLR2J	1675.16	-0.0211217	0.224204	-0.0942075	0.924944	0.98326
ENSG00000005100	DHX33	287.665	-0.446791	0.374376	-1.19343	0.232701	0.669335
ENSG00000005102	MEOX1	3.84748	-1.52766	3.00095	-0.509058	0.610711	NA
ENSG00000005108	THSD7A	132.758	1.39051	0.599315	2.32017	0.0203314	0.327235
ENSG00000005156	LIG3	1927.36	-0.521716	0.246461	-2.11683	0.0342743	0.388254
ENSG00000005175	RPAP3	2342.78	-0.256463	0.281358	-0.911519	0.362022	0.767588
ENSG00000005187	ACSM3	2582.06	-0.235395	0.391395	-0.601427	0.547556	0.861481
ENSG00000005189	REXO5	2029.29	-0.188965	0.503371	-0.375398	0.707364	0.921715
ENSG00000005194	CIAPIN1	5121.41	-0.0989768	0.192197	-0.514976	0.60657	0.88362
ENSG00000005206	SPPL2B	3199.21	-0.215973	0.298854	-0.722669	0.469883	0.823271
ENSG00000005238	FAM214B	1172.12	0.28489	0.342426	0.831977	0.405422	0.791938
ENSG00000005243	COPZ2	190.213	0.00562377	0.557052	0.0100956	0.991945	0.997869
ENSG00000005249	PRKAR2B	5576.78	-1.16754	0.481026	-2.42718	0.0152165	0.287472
ENSG00000005302	MSL3	1465.93	0.161835	0.292128	0.553988	0.579587	0.872904
ENSG00000005339	CREBBP	2114.06	0.0570938	0.29763	0.191828	0.847877	0.966098
ENSG00000005379	TSPOAP1	2687.93	0.453856	0.409949	1.1071	0.268249	0.699693
ENSG00000005381	MPO	430187	-0.196846	0.736209	-0.267378	0.789178	0.947804
ENSG00000005421	PON1	6.33657	1.26604	1.63	0.776715	0.437327	NA
ENSG00000005436	GCFC2	2182.22	0.259331	0.192583	1.3466	0.178111	0.622775
ENSG00000005448	WDR54	1858.21	-0.19485	0.283577	-0.687113	0.492011	0.835355
ENSG00000005469	CROT	315.161	-0.120766	0.220113	-0.548656	0.583241	0.873977
ENSG00000005471	ABCB4	62.9773	0.70155	0.738319	0.950199	0.342011	0.753472
ENSG00000005483	KMT2E	12013.6	0.385453	0.417463	0.923324	0.355838	0.764103
ENSG00000005486	RHBDD2	7852.03	0.135007	0.285216	0.473348	0.635965	0.895305
ENSG00000005513	SOX8	57.9816	3.08723	1.44207	2.14083	0.0322874	0.381027
ENSG00000005700	IBTK	2029.95	-0.512574	0.235957	-2.17232	0.0298316	0.371535
ENSG00000005801	ZNF195	2130.9	0.45928	0.201419	2.28022	0.0225944	0.339713
ENSG00000005810	MYCBP2	1961.01	-0.237612	0.234056	-1.01519	0.310014	0.732186
ENSG00000005812	FBXL3	3459.7	-0.00733638	0.250988	-0.02923	0.976681	0.995276
ENSG00000005844	ITGAL	2348.41	-0.0744323	0.393087	-0.189353	0.849816	0.966574
ENSG00000005882	PDK2	1404.46	-0.212129	0.247082	-0.858534	0.390597	0.783093
ENSG00000005884	ITGA3	52.5514	2.47325	1.35644	1.82335	0.0682511	0.481703
ENSG00000005889	ZFX	2285.62	0.14535	0.23507	0.618327	0.53636	0.856835
ENSG00000005893	LAMP2	22289.2	-0.0543974	0.273075	-0.199203	0.842104	0.964292
ENSG00000005961	ITGA2B	14692	-1.11614	0.5046	-2.21192	0.0269721	0.358398
ENSG00000005981	ASB4	0	NA	NA	NA	NA	NA
ENSG00000006007	GDE1	5208.8	0.226966	0.172437	1.31623	0.188098	0.631244
ENSG00000006015	REX1BD	4283.34	-0.0110717	0.288244	-0.0384109	0.96936	0.993152
ENSG00000006016	CRLF1	1.91766	-1.97911	2.67707	-0.739281	0.459737	NA
ENSG00000006025	OSBPL7	732.789	-0.271572	0.630769	-0.430542	0.666802	0.907059
ENSG00000006042	TMEM98	2179.45	-0.519739	0.452559	-1.14844	0.250786	0.684397
ENSG00000006047	YBX2	21.75	-2.29318	1.12771	-2.03349	0.0420028	0.414328
ENSG00000006059	KRT33A	0.131767	0.783043	3.0508	0.256668	0.797435	NA
ENSG00000006062	MAP3K14	805.07	0.236749	0.360445	0.656824	0.511294	0.845323
ENSG00000006071	ABCC8	0.36988	1.34647	3.04013	0.442898	0.65784	NA
ENSG00000006116	CACNG3	0	NA	NA	NA	NA	NA
ENSG00000006118	TMEM132A	66.7211	1.0371	1.32866	0.780559	0.435062	0.803457
ENSG00000006125	AP2B1	5512.67	-0.245143	0.200835	-1.22062	0.222229	0.660903
ENSG00000006128	TAC1	0.357894	0.751767	3.04309	0.24704	0.804877	NA
ENSG00000006194	ZNF263	3330.77	-0.278792	0.215756	-1.29216	0.196301	0.638882
ENSG00000006210	CX3CL1	36.5135	-6.43452	2.98583	-2.15502	0.0311604	0.377031
ENSG00000006282	SPATA20	3104.1	0.246279	0.244156	1.00869	0.313122	0.734938
ENSG00000006283	CACNA1G	4.44264	-1.27386	2.64764	-0.48113	0.630424	NA
ENSG00000006327	TNFRSF12A	1105.42	1.01736	0.467257	2.17731	0.0294572	0.370048
ENSG00000006377	DLX6	3.50508	1.74316	2.9989	0.581266	0.561061	NA
ENSG00000006432	MAP3K9	73.2419	-2.01655	0.860759	-2.34276	0.0191416	0.318993
ENSG00000006451	RALA	4348.79	0.509514	0.225318	2.26131	0.0237402	0.345527
ENSG00000006453	BAIAP2L1	55.5698	1.91408	0.830214	2.30552	0.0211374	0.331496
ENSG00000006459	KDM7A	575.531	0.287835	0.510047	0.564329	0.57253	0.871325
ENSG00000006468	ETV1	10.4815	-0.187125	2.55891	-0.0731269	0.941705	0.986702
ENSG00000006530	AGK	1959.85	-0.663336	0.226187	-2.93269	0.00336041	0.151504
ENSG00000006534	ALDH3B1	4599.18	-0.00398141	0.548515	-0.00725854	0.994209	0.998343
ENSG00000006555	TTC22	122.372	-2.48991	1.08164	-2.30198	0.0213365	0.332376
ENSG00000006576	PHTF2	1044.25	0.342912	0.383322	0.894579	0.371012	0.77296
ENSG00000006606	CCL26	8.60112	-1.76988	1.45034	-1.22032	0.222342	0.660903
ENSG00000006607	FARP2	1155.33	-0.307963	0.290929	-1.05855	0.289804	0.717363
ENSG00000006611	USH1C	1.71297	0.814563	3.03792	0.268132	0.788598	NA
ENSG00000006625	GGCT	786.492	-0.309061	0.252087	-1.22601	0.220196	0.660318
ENSG00000006634	DBF4	1375.36	0.0712108	0.277445	0.256667	0.797436	0.950633
ENSG00000006638	TBXA2R	423.834	-0.273309	0.412596	-0.662413	0.507707	0.844034
ENSG00000006652	IFRD1	3544.95	0.54756	0.371355	1.47449	0.140349	0.582823
ENSG00000006659	LGALS14	0	NA	NA	NA	NA	NA
ENSG00000006695	COX10	1310.39	-0.359532	0.282233	-1.27388	0.202705	0.64452
ENSG00000006704	GTF2IRD1	82.7169	-1.17308	0.692727	-1.69342	0.0903749	0.512013
ENSG00000006712	PAF1	3471.21	0.144369	0.155435	0.928802	0.352992	0.761979
ENSG00000006715	VPS41	3038.5	-0.863543	0.405484	-2.12966	0.0331997	0.383602
ENSG00000006740	ARHGAP44	158.755	-1.95655	0.949987	-2.05955	0.0394414	0.404256
ENSG00000006744	ELAC2	5591.98	-0.644017	0.224598	-2.86741	0.0041384	0.169682
ENSG00000006747	SCIN	2.64222	0.00713007	1.73069	0.00411979	0.996713	NA
ENSG00000006756	ARSD	1680.07	-0.391831	0.333689	-1.17424	0.240298	0.675996
ENSG00000006757	PNPLA4	772.364	-0.468302	0.589247	-0.794746	0.426761	0.801522
ENSG00000006788	MYH13	0.24991	-0.0469692	3.04168	-0.0154419	0.98768	NA
ENSG00000006831	ADIPOR2	372.191	0.397674	0.234266	1.69753	0.0895962	0.510358
ENSG00000006837	CDKL3	15.609	-0.285013	0.71389	-0.399239	0.689717	0.91576
ENSG00000007001	UPP2	5.90672	0.370904	1.47348	0.25172	0.801258	NA
ENSG00000007038	PRSS21	4963.77	-0.297616	0.577507	-0.515346	0.606311	0.88362
ENSG00000007047	MARK4	394.177	0.676747	0.310887	2.17683	0.0294935	0.370048
ENSG00000007062	PROM1	5686.56	-1.07434	0.547623	-1.96182	0.0497839	0.434953
ENSG00000007080	CCDC124	3397.84	-0.119514	0.130517	-0.915702	0.359823	0.766841
ENSG00000007129	CEACAM21	281.869	-0.499636	0.392919	-1.2716	0.203515	0.645349
ENSG00000007168	PAFAH1B1	1538.88	0.283206	0.272856	1.03793	0.299302	0.72363
ENSG00000007171	NOS2	2.65938	0.323886	3.01736	0.107341	0.914519	NA
ENSG00000007174	DNAH9	0.707636	0.856583	3.01751	0.283871	0.776509	NA
ENSG00000007202	KIAA0100	3980.85	-0.448637	0.232615	-1.92867	0.0537724	0.447883
ENSG00000007216	SLC13A2	0	NA	NA	NA	NA	NA
ENSG00000007237	GAS7	2734.15	-0.0650684	0.435226	-0.149505	0.881155	0.974599
ENSG00000007255	TRAPPC6A	3032.99	-0.050152	0.236155	-0.212369	0.831819	0.960421
ENSG00000007264	MATK	3999.07	-0.645112	0.430639	-1.49803	0.134124	0.575649
ENSG00000007306	CEACAM7	0	NA	NA	NA	NA	NA
ENSG00000007312	CD79B	2792.96	-0.471911	0.454259	-1.03886	0.29887	0.723539
ENSG00000007314	SCN4A	25.4629	-5.41701	1.26822	-4.27134	1.94e-05	0.00611898
ENSG00000007341	ST7L	789.141	0.226489	0.222117	1.01969	0.307878	0.730983
ENSG00000007350	TKTL1	1260.63	-3.85813	1.00661	-3.83279	0.000126698	0.0225678
ENSG00000007372	PAX6	0.410398	0.722426	3.04262	0.237435	0.812319	NA
ENSG00000007376	RPUSD1	3611.67	-0.226764	0.219632	-1.03247	0.301851	0.725588
ENSG00000007384	RHBDF1	672.764	0.347614	0.359646	0.966546	0.333771	0.750761
ENSG00000007392	LUC7L	2059.99	0.351374	0.36839	0.953809	0.34018	0.752841
ENSG00000007402	CACNA2D2	42.7811	-1.28837	0.906516	-1.42123	0.155249	0.600747
ENSG00000007516	BAIAP3	84.716	-3.12109	0.738706	-4.22508	2.39e-05	0.00693757
ENSG00000007520	TSR3	2762.5	-0.248021	0.182529	-1.3588	0.174208	0.619493
ENSG00000007541	PIGQ	1843.03	-0.43536	0.236962	-1.83726	0.0661719	0.478053
ENSG00000007545	CRAMP1	436.899	-0.0988953	0.396389	-0.249491	0.802981	0.952311
ENSG00000007866	TEAD3	47.9035	-0.339495	1.02716	-0.330519	0.741008	0.934582
ENSG00000007908	SELE	196.552	1.39696	1.22252	1.14269	0.253168	0.686926
ENSG00000007923	DNAJC11	2006.46	-0.407099	0.212107	-1.91931	0.054945	0.452359
ENSG00000007933	FMO3	50.5931	-2.2413	0.974338	-2.30033	0.0214293	0.332862
ENSG00000007944	MYLIP	3415.96	0.63488	0.304197	2.08707	0.0368816	0.395945
ENSG00000007952	NOX1	8.55103	-1.74722	1.37225	-1.27325	0.20293	0.644907
ENSG00000007968	E2F2	749.533	-0.44431	0.382988	-1.16011	0.246003	0.680967
ENSG00000008018	PSMB1	15003.4	0.248866	0.207638	1.19855	0.230702	0.667673
ENSG00000008056	SYN1	262.904	-0.503803	0.869714	-0.579274	0.562404	0.867907
ENSG00000008083	JARID2	5868.92	0.486484	0.404034	1.20407	0.228564	0.6661
ENSG00000008086	CDKL5	80.8206	-0.305231	0.847716	-0.360062	0.7188	0.926743
ENSG00000008118	CAMK1G	0.820795	0.728204	3.03972	0.239563	0.810669	NA
ENSG00000008128	CDK11A	114.704	1.06996	0.614514	1.74114	0.0816591	0.49778
ENSG00000008130	NADK	3264.45	-0.471253	0.228205	-2.06505	0.0389186	0.40197
ENSG00000008196	TFAP2B	0	NA	NA	NA	NA	NA
ENSG00000008197	TFAP2D	0	NA	NA	NA	NA	NA
ENSG00000008226	DLEC1	41.6703	1.22575	0.718687	1.70554	0.0880947	0.507241
ENSG00000008256	CYTH3	778.596	-0.273727	0.387171	-0.706992	0.479571	0.828796
ENSG00000008277	ADAM22	202.864	-1.15404	0.770114	-1.49853	0.133995	0.575586
ENSG00000008282	SYPL1	9821.53	-0.0660831	0.14726	-0.448752	0.65361	0.901744
ENSG00000008283	CYB561	1773.62	-0.082213	0.263483	-0.312024	0.755023	0.93848
ENSG00000008294	SPAG9	2180.95	0.794997	0.355386	2.237	0.0252867	0.351121
ENSG00000008300	CELSR3	137.155	-0.0373546	0.612118	-0.0610252	0.951339	0.988862
ENSG00000008311	AASS	306.093	-0.86693	0.813062	-1.06625	0.286309	0.714744
ENSG00000008323	PLEKHG6	76.1682	-0.0963761	0.648088	-0.148708	0.881784	0.974741
ENSG00000008324	SS18L2	2235.74	0.231051	0.205778	1.12282	0.261516	0.693921
ENSG00000008382	MPND	364.84	-0.419491	0.2096	-2.00139	0.0453504	0.422363
ENSG00000008394	MGST1	11266.4	0.161315	0.404939	0.398368	0.690359	0.915865
ENSG00000008405	CRY1	3324.37	0.477357	0.387709	1.23123	0.218238	0.657773
ENSG00000008438	PGLYRP1	1118.75	-3.42301	0.598137	-5.72278	1.05e-08	1.53e-05
ENSG00000008441	NFIX	820.303	-0.283537	0.338987	-0.836425	0.402916	0.79073
ENSG00000008513	ST3GAL1	5646.05	0.347513	0.381297	0.911397	0.362086	0.767588
ENSG00000008516	MMP25	107.379	-2.4073	0.464504	-5.18253	2.19e-07	0.000198204
ENSG00000008517	IL32	208.582	-0.680454	0.772262	-0.881118	0.378254	0.776775
ENSG00000008710	PKD1	795.956	-0.205544	0.310526	-0.661924	0.50802	0.844081
ENSG00000008735	MAPK8IP2	4.04317	0.406889	2.99331	0.135933	0.891874	NA
ENSG00000008838	MED24	5662.22	-0.460524	0.212774	-2.16439	0.0304347	0.372637
ENSG00000008853	RHOBTB2	279.281	-1.4012	0.745277	-1.8801	0.0600942	0.465359
ENSG00000008869	HEATR5B	1418.57	-0.103123	0.33272	-0.309941	0.756606	0.939474
ENSG00000008952	SEC62	3623.39	0.468225	0.20402	2.295	0.021733	0.33502
ENSG00000008988	RPS20	21609.4	0.595127	0.23065	2.58021	0.00987395	0.247089
ENSG00000009307	CSDE1	39164.3	0.24312	0.236017	1.03009	0.302966	0.726122
ENSG00000009335	UBE3C	1883.52	-0.48316	0.247489	-1.95224	0.0509093	0.438856
ENSG00000009413	REV3L	1940.14	0.121587	0.321832	0.377795	0.705583	0.9214
ENSG00000009694	TENM1	21.8255	2.27158	1.6421	1.38334	0.16656	0.611776
ENSG00000009709	PAX7	0	NA	NA	NA	NA	NA
ENSG00000009724	MASP2	14.2877	0.772326	1.44128	0.535861	0.592055	0.878221
ENSG00000009765	IYD	0	NA	NA	NA	NA	NA
ENSG00000009780	FAM76A	392.849	0.0294319	0.266195	0.110565	0.911961	0.979965
ENSG00000009790	TRAF3IP3	1721.85	-0.360576	0.427924	-0.842615	0.399444	0.788335
ENSG00000009830	POMT2	347.413	-0.417557	0.394076	-1.05958	0.289334	0.716939
ENSG00000009844	VTA1	4286.57	-0.0614707	0.257694	-0.238541	0.811461	0.953982
ENSG00000009950	MLXIPL	4.62112	1.24383	3.03186	0.410253	0.68162	NA
ENSG00000009954	BAZ1B	3358.13	-0.225607	0.21349	-1.05676	0.290622	0.717447
ENSG00000010017	RANBP9	1044.7	0.210507	0.245183	0.858571	0.390577	0.783093
ENSG00000010030	ETV7	69.3308	0.896547	0.939995	0.953778	0.340196	0.752841
ENSG00000010072	SPRTN	1269.84	-0.0890031	0.187653	-0.474297	0.635288	0.895237
ENSG00000010165	METTL13	1779.59	-0.702713	0.457792	-1.53501	0.124783	0.562096
ENSG00000010219	DYRK4	682.572	-0.149278	0.360094	-0.414553	0.678469	0.911091
ENSG00000010244	ZNF207	15549	0.316797	0.219351	1.44425	0.14867	0.593819
ENSG00000010256	UQCRC1	16647.3	-0.143576	0.182793	-0.785458	0.432185	0.803363
ENSG00000010270	STARD3NL	7747.23	0.844305	0.283999	2.97291	0.0029499	0.142138
ENSG00000010278	CD9	4805.62	0.125687	0.343948	0.365423	0.714795	0.92479
ENSG00000010282	HHATL	0	NA	NA	NA	NA	NA
ENSG00000010292	NCAPD2	4272.43	-1.06581	0.408346	-2.61007	0.00905249	0.235675
ENSG00000010295	IFFO1	1505.42	-0.193238	0.241746	-0.799345	0.424091	0.80034
ENSG00000010310	GIPR	4.11215	0.475189	3.01671	0.157519	0.874836	NA
ENSG00000010318	PHF7	1181.7	-0.163607	0.20783	-0.787215	0.431156	0.803115
ENSG00000010319	SEMA3G	57.2654	-1.25687	1.40273	-0.896013	0.370246	0.772236
ENSG00000010322	NISCH	4267.83	-0.402464	0.250606	-1.60596	0.108282	0.538956
ENSG00000010327	STAB1	1759.01	-0.471568	0.442627	-1.06538	0.286702	0.715075
ENSG00000010361	FUZ	741.119	-0.241519	0.292604	-0.825413	0.409137	0.793128
ENSG00000010379	SLC6A13	2.09967	1.55582	3.00646	0.517492	0.604813	NA
ENSG00000010404	IDS	7870.66	0.523682	0.319093	1.64116	0.100765	0.52946
ENSG00000010438	PRSS3	6.01839	-0.310961	2.97986	-0.104354	0.916888	NA
ENSG00000010539	ZNF200	392.616	0.0584062	0.306839	0.190348	0.849037	0.966471
ENSG00000010610	CD4	6955.12	-1.00209	0.567478	-1.76586	0.0774192	0.494177
ENSG00000010626	LRRC23	336.45	-0.371194	0.537885	-0.6901	0.490131	0.834594
ENSG00000010671	BTK	4266.13	-0.39416	0.332456	-1.1856	0.235779	0.672316
ENSG00000010704	HFE	67.9761	-5.09344	1.15311	-4.41713	1e-05	0.00372861
ENSG00000010803	SCMH1	2152.9	0.0970824	0.362196	0.268038	0.78867	0.947779
ENSG00000010810	FYN	4415.3	-0.00123439	0.39982	-0.00308738	0.997537	0.999146
ENSG00000010818	HIVEP2	312.044	0.301302	0.334239	0.901458	0.367345	0.770761
ENSG00000010932	FMO1	42.8821	-0.507209	0.445814	-1.13772	0.255239	0.688234
ENSG00000011007	ELOA	3928.94	0.192216	0.241125	0.797161	0.425358	0.80101
ENSG00000011009	LYPLA2	4669.39	-0.12284	0.216477	-0.567452	0.570407	0.871084
ENSG00000011021	CLCN6	1177.75	0.601571	0.435047	1.38277	0.166734	0.611776
ENSG00000011028	MRC2	1033.84	-0.247339	0.372489	-0.664017	0.506679	0.84334
ENSG00000011052	NME1-NME2	0	NA	NA	NA	NA	NA
ENSG00000011083	SLC6A7	4.93862	0.368743	2.88703	0.127724	0.898367	NA
ENSG00000011105	TSPAN9	73.208	0.543109	1.05299	0.515778	0.606009	0.88362
ENSG00000011114	BTBD7	1035.71	-0.0433346	0.30166	-0.143654	0.885774	0.975411
ENSG00000011132	APBA3	1020.38	-0.382056	0.238662	-1.60082	0.109416	0.540531
ENSG00000011143	MKS1	1123.72	-1.47924	0.61951	-2.38776	0.0169514	0.300792
ENSG00000011198	ABHD5	1338.7	0.141019	0.163662	0.861645	0.388883	0.782025
ENSG00000011201	ANOS1	53.6428	-2.28902	1.38153	-1.65688	0.0975444	0.524628
ENSG00000011243	AKAP8L	5198.19	0.3364	0.281439	1.19529	0.231975	0.668708
ENSG00000011258	MBTD1	748.008	-0.301638	0.304407	-0.990902	0.321733	0.742049
ENSG00000011260	UTP18	4353.12	-0.00359104	0.167824	-0.0213977	0.982928	0.996486
ENSG00000011275	RNF216	3813.02	0.177134	0.284163	0.623355	0.533051	0.855361
ENSG00000011295	TTC19	8615.58	-0.283538	0.201176	-1.4094	0.158716	0.60378
ENSG00000011304	PTBP1	26448.2	-0.227875	0.153426	-1.48524	0.137479	0.577405
ENSG00000011332	DPF1	68.2383	0.0468638	0.429684	0.109066	0.91315	0.980237
ENSG00000011347	SYT7	5.53679	-2.37147	2.9837	-0.794807	0.426726	NA
ENSG00000011376	LARS2	1552.23	-0.474589	0.282279	-1.68127	0.0927097	0.51598
ENSG00000011405	PIK3C2A	637.704	0.0798285	0.292461	0.272954	0.784888	0.946404
ENSG00000011422	PLAUR	14658.3	0.278102	0.522391	0.532364	0.594474	0.878462
ENSG00000011426	ANLN	1122.48	-0.836189	0.443405	-1.88583	0.0593173	0.463003
ENSG00000011451	WIZ	578.562	0.115906	0.279463	0.414746	0.678328	0.911091
ENSG00000011454	RABGAP1	1811.62	-0.0860591	0.29039	-0.296357	0.766958	0.94205
ENSG00000011465	DCN	294.364	-1.47955	1.50035	-0.986137	0.324066	0.743828
ENSG00000011478	QPCTL	552.357	0.170248	0.314969	0.540522	0.588837	0.876469
ENSG00000011485	PPP5C	2739.41	-0.552554	0.250585	-2.20506	0.0274499	0.359692
ENSG00000011523	CEP68	3614.47	-0.259516	0.249575	-1.03983	0.298417	0.723127
ENSG00000011566	MAP4K3	1155.25	0.281375	0.308908	0.910869	0.362364	0.767588
ENSG00000011590	ZBTB32	57.01	-3.036	1.31807	-2.30337	0.0212579	0.331711
ENSG00000011600	TYROBP	6520.52	-0.501599	0.465222	-1.07819	0.280948	0.710485
ENSG00000011638	TMEM159	631.158	0.0376771	0.246042	0.153133	0.878294	0.97385
ENSG00000011677	GABRA3	0	NA	NA	NA	NA	NA
ENSG00000012048	BRCA1	911.965	-0.688959	0.406717	-1.69395	0.0902745	0.512013
ENSG00000012061	ERCC1	4391.16	0.249802	0.210024	1.1894	0.234283	0.670565
ENSG00000012124	CD22	668.726	-0.847895	0.447477	-1.89483	0.0581145	0.461022
ENSG00000012171	SEMA3B	7.57731	1.34823	2.43743	0.553138	0.580169	0.873025
ENSG00000012174	MBTPS2	896.006	-0.388094	0.304458	-1.2747	0.202414	0.64421
ENSG00000012211	PRICKLE3	426.831	-0.102288	0.357821	-0.285864	0.774983	0.944646
ENSG00000012223	LTF	25856.3	-3.58043	0.667601	-5.36313	8.18e-08	8.89e-05
ENSG00000012232	EXTL3	800.106	-0.658999	0.367641	-1.79251	0.0730516	0.488658
ENSG00000012504	NR1H4	0.212692	0.83014	3.04486	0.272637	0.785133	NA
ENSG00000012660	ELOVL5	5475.81	-0.489175	0.190936	-2.56198	0.0104077	0.248227
ENSG00000012779	ALOX5	1645.84	-1.32077	0.500736	-2.63765	0.00834822	0.22831
ENSG00000012817	KDM5D	1072.53	0.10567	0.418995	0.252199	0.800888	0.951993
ENSG00000012822	CALCOCO1	2833.94	-0.260002	0.272236	-0.955061	0.339547	0.752841
ENSG00000012963	UBR7	3352.24	-0.398654	0.235574	-1.69227	0.0905944	0.512318
ENSG00000012983	MAP4K5	2595.94	0.233251	0.334952	0.69637	0.486197	0.832044
ENSG00000013016	EHD3	761.117	-1.1395	0.582291	-1.95692	0.0503567	0.436847
ENSG00000013275	PSMC4	5654.99	0.102398	0.167651	0.610779	0.541346	0.859333
ENSG00000013288	MAN2B2	2613.55	-0.120211	0.273058	-0.440242	0.659762	0.90448
ENSG00000013293	SLC7A14	0.601309	0.971225	3.02683	0.320872	0.748307	NA
ENSG00000013297	CLDN11	1.26051	1.22075	3.00919	0.405673	0.684983	NA
ENSG00000013306	SLC25A39	7462	-0.205626	0.212084	-0.96955	0.332271	0.749762
ENSG00000013364	MVP	5172.59	0.280708	0.356522	0.78735	0.431077	0.803115
ENSG00000013374	NUB1	3779.79	-0.118085	0.24715	-0.477786	0.632803	0.89406
ENSG00000013375	PGM3	552.008	0.0890325	0.290051	0.306955	0.758878	0.939983
ENSG00000013392	RWDD2A	160.599	0.505338	0.735387	0.687173	0.491974	0.835355
ENSG00000013441	CLK1	6089.69	0.950297	0.455871	2.08457	0.037108	0.396277
ENSG00000013503	POLR3B	375.428	0.0207896	0.473975	0.0438623	0.965014	0.991676
ENSG00000013523	ANGEL1	2690.82	-0.546839	0.294664	-1.8558	0.0634815	0.471535
ENSG00000013561	RNF14	1258.36	-0.0232316	0.298739	-0.0777657	0.938014	0.986159
ENSG00000013563	DNASE1L1	552.363	-0.146659	0.213302	-0.687565	0.491727	0.835355
ENSG00000013573	DDX11	2360.29	-0.566671	0.318272	-1.78046	0.0750005	0.490987
ENSG00000013583	HEBP1	3086.57	0.0710081	0.283265	0.250677	0.802064	0.952102
ENSG00000013588	GPRC5A	366.707	2.33432	1.19908	1.94676	0.0515637	0.440032
ENSG00000013619	MAMLD1	96.5732	0.0427417	1.11108	0.0384687	0.969314	0.993152
ENSG00000013725	CD6	430.47	0.67377	0.585818	1.15014	0.250088	0.684035
ENSG00000013810	TACC3	7691.53	-0.503528	0.301477	-1.6702	0.0948792	0.518827
ENSG00000014123	UFL1	1779.39	0.011975	0.242296	0.0494232	0.960582	0.990679
ENSG00000014138	POLA2	2784.82	-0.999733	0.596743	-1.67532	0.093872	0.516813
ENSG00000014164	ZC3H3	3218.73	0.193143	0.265485	0.727507	0.466915	0.821349
ENSG00000014216	CAPN1	12972	-0.382683	0.192114	-1.99196	0.0463757	0.425056
ENSG00000014257	ACPP	245.899	-0.521548	0.418687	-1.24567	0.212884	0.652675
ENSG00000014641	MDH1	9147.77	-0.187669	0.24609	-0.762604	0.445699	0.807986
ENSG00000014824	SLC30A9	5460.12	-0.27213	0.224923	-1.20988	0.226326	0.664519
ENSG00000014914	MTMR11	245.078	0.0433196	0.675517	0.064128	0.948868	0.988184
ENSG00000014919	COX15	2480.05	-0.596379	0.398326	-1.49721	0.134338	0.575649
ENSG00000015133	CCDC88C	1390.46	-0.271873	0.347438	-0.782508	0.433916	0.803457
ENSG00000015153	YAF2	666.414	0.90835	0.187236	4.85135	1.23e-06	0.000740188
ENSG00000015171	ZMYND11	2521.18	-0.729968	0.235456	-3.10024	0.00193367	0.113487
ENSG00000015285	WAS	2201.97	0.175659	0.244514	0.718401	0.47251	0.825358
ENSG00000015413	DPEP1	82.7188	-0.297967	0.762793	-0.390626	0.696074	0.917695
ENSG00000015475	BID	8162.32	0.288542	0.310822	0.92832	0.353242	0.761979
ENSG00000015479	MATR3	208.261	0.30302	0.441439	0.686438	0.492437	0.83544
ENSG00000015520	NPC1L1	7.03358	0.896403	3.01545	0.29727	0.76626	0.941827
ENSG00000015532	XYLT2	564.246	-0.76703	0.552292	-1.38881	0.16489	0.611132
ENSG00000015568	RGPD5	56.7145	0.95191	0.462605	2.05772	0.0396174	0.405439
ENSG00000015592	STMN4	0.836344	-0.0359516	3.03803	-0.0118338	0.990558	NA
ENSG00000015676	NUDCD3	3096.55	-0.860507	0.378664	-2.27248	0.0230575	0.341324
ENSG00000016082	ISL1	0.263743	1.40433	3.04257	0.461559	0.644397	NA
ENSG00000016391	CHDH	4.93964	-1.11183	2.97914	-0.373204	0.708997	NA
ENSG00000016402	IL20RA	1.1685	-0.110668	3.03799	-0.036428	0.970941	NA
ENSG00000016490	CLCA1	0	NA	NA	NA	NA	NA
ENSG00000016602	CLCA4	0	NA	NA	NA	NA	NA
ENSG00000016864	GLT8D1	1954.04	-0.326572	0.324163	-1.00743	0.313727	0.735368
ENSG00000017260	ATP2C1	4965.41	0.216419	0.223096	0.970072	0.33201	0.74971
ENSG00000017427	IGF1	21.8916	-1.34234	1.18238	-1.13528	0.256258	0.688971
ENSG00000017483	SLC38A5	3119.1	-0.540925	0.353824	-1.5288	0.126315	0.563919
ENSG00000017797	RALBP1	3558.19	-0.117772	0.187237	-0.628997	0.529351	0.85273
ENSG00000018189	RUFY3	931.81	0.0155941	0.285975	0.0545297	0.956513	0.99012
ENSG00000018236	CNTN1	75.1025	-1.14895	1.00461	-1.14368	0.252758	0.686592
ENSG00000018280	SLC11A1	2381.88	-0.980805	0.443361	-2.2122	0.0269526	0.358398
ENSG00000018408	WWTR1	353.721	-0.737173	0.878441	-0.839184	0.401366	0.789436
ENSG00000018510	AGPS	4441.4	-0.260016	0.189422	-1.37268	0.169851	0.614678
ENSG00000018607	ZNF806	0.276422	0.345762	3.04339	0.113611	0.909546	NA
ENSG00000018610	CXorf56	725.67	-0.20362	0.301737	-0.674825	0.499787	0.839267
ENSG00000018625	ATP1A2	5.51579	-1.07927	2.4843	-0.434435	0.663972	NA
ENSG00000018699	TTC27	2710.83	-1.14861	0.411883	-2.78868	0.00529232	0.186849
ENSG00000018869	ZNF582	230.146	-0.414588	0.684003	-0.60612	0.544435	0.86057
ENSG00000019102	VSIG2	42.8354	-1.65493	0.495824	-3.33773	0.000844663	0.0717006
ENSG00000019144	PHLDB1	169.459	0.667124	0.717694	0.929538	0.35261	0.76194
ENSG00000019169	MARCO	302.839	-1.231	0.688263	-1.78856	0.0736856	0.489259
ENSG00000019186	CYP24A1	0	NA	NA	NA	NA	NA
ENSG00000019485	PRDM11	648.285	-0.155357	0.383002	-0.405631	0.685014	0.913371
ENSG00000019505	SYT13	0	NA	NA	NA	NA	NA
ENSG00000019549	SNAI2	79.9505	-0.236109	1.31044	-0.180176	0.857015	0.968476
ENSG00000019582	CD74	269243	0.300139	0.355535	0.844189	0.398564	0.78781
ENSG00000019991	HGF	1821.05	0.183313	0.554951	0.330323	0.741156	0.93466
ENSG00000019995	ZRANB1	1211.72	-0.11459	0.335369	-0.341683	0.73259	0.931777
ENSG00000020129	NCDN	1771.12	-0.353406	0.292729	-1.20728	0.227324	0.665374
ENSG00000020181	ADGRA2	329.871	-1.21207	0.835778	-1.45023	0.146996	0.591805
ENSG00000020219	CCT8L1P	0.856485	0.811682	3.03907	0.267082	0.789406	NA
ENSG00000020256	ZFP64	659.38	-0.865319	0.455741	-1.89871	0.0576026	0.459194
ENSG00000020426	MNAT1	630.58	0.0884728	0.218598	0.404728	0.685677	0.91351
ENSG00000020577	SAMD4A	92.8094	0.0618795	0.876248	0.0706187	0.943701	0.987029
ENSG00000020633	RUNX3	8219.91	0.186868	0.390501	0.478533	0.632271	0.893709
ENSG00000020922	MRE11	2243.6	-0.198981	0.387556	-0.513426	0.607653	0.8841
ENSG00000021300	PLEKHB1	323.151	-0.877468	0.333063	-2.63454	0.00842505	0.228856
ENSG00000021355	SERPINB1	34370.1	-0.022268	0.27695	-0.0804045	0.935916	0.985966
ENSG00000021461	CYP3A43	1.79856	1.44639	3.01915	0.479071	0.631888	NA
ENSG00000021488	SLC7A9	3.15871	-1.28878	2.15463	-0.598144	0.549744	NA
ENSG00000021574	SPAST	1461.43	-0.527321	0.306443	-1.72078	0.0852901	0.504314
ENSG00000021645	NRXN3	15.9729	-2.88647	1.66418	-1.73447	0.0828344	0.499595
ENSG00000021762	OSBPL5	1046.89	-0.055988	0.263834	-0.212209	0.831944	0.960421
ENSG00000021776	AQR	2583.97	-0.177106	0.277495	-0.63823	0.523324	0.850459
ENSG00000021826	CPS1	47.8292	-1.92473	1.45173	-1.32582	0.184899	0.628458
ENSG00000021852	C8B	0.579135	1.2924	3.03635	0.425644	0.670367	NA
ENSG00000022267	FHL1	4439.96	-0.308607	0.282731	-1.09152	0.275043	0.706413
ENSG00000022277	RTF2	6852.05	-0.0274306	0.22405	-0.122431	0.902558	0.978898
ENSG00000022355	GABRA1	0	NA	NA	NA	NA	NA
ENSG00000022556	NLRP2	174.397	-1.96058	0.948387	-2.06728	0.0387073	0.401394
ENSG00000022567	SLC45A4	266.677	-0.184963	0.352895	-0.524131	0.600188	0.881262
ENSG00000022840	RNF10	20722.3	0.427429	0.263025	1.62505	0.104151	0.532621
ENSG00000022976	ZNF839	447.481	0.305773	0.414695	0.737344	0.460913	0.817454
ENSG00000023041	ZDHHC6	3013.53	0.113939	0.316759	0.359702	0.71907	0.926845
ENSG00000023171	GRAMD1B	675.483	0.8021	0.538514	1.48947	0.136364	0.57664
ENSG00000023191	RNH1	13170	0.0365563	0.391131	0.0934629	0.925536	0.98326
ENSG00000023228	NDUFS1	4189.95	-0.353613	0.203707	-1.73589	0.0825838	0.499595
ENSG00000023287	RB1CC1	5568.84	0.532396	0.302936	1.75745	0.078841	0.495314
ENSG00000023318	ERP44	10063.9	0.480543	0.266716	1.80171	0.0715917	0.486276
ENSG00000023330	ALAS1	3841.5	0.751298	0.308787	2.43307	0.0149716	0.284644
ENSG00000023445	BIRC3	1704.27	0.622667	0.470731	1.32277	0.185913	0.629228
ENSG00000023516	AKAP11	364.677	-0.414885	0.359422	-1.15431	0.248372	0.682434
ENSG00000023572	GLRX2	608.109	-0.203176	0.206221	-0.985236	0.324508	0.743948
ENSG00000023608	SNAPC1	596.175	0.32555	0.387863	0.839341	0.401278	0.789436
ENSG00000023697	DERA	3065.13	-0.227764	0.301622	-0.755133	0.450169	0.810448
ENSG00000023734	STRAP	14328.8	0.392394	0.287063	1.36693	0.171648	0.617361
ENSG00000023839	ABCC2	56.1343	0.806049	1.01705	0.792535	0.428049	0.802306
ENSG00000023892	DEF6	5730.3	-0.151855	0.193581	-0.784452	0.432775	0.803434
ENSG00000023902	PLEKHO1	6581.61	0.562053	0.409146	1.37372	0.169528	0.614295
ENSG00000023909	GCLM	1446.9	0.0182228	0.387113	0.0470736	0.962455	0.990991
ENSG00000024048	UBR2	1480.4	0.121548	0.244164	0.497814	0.618615	0.887381
ENSG00000024422	EHD2	2366.16	-0.983701	0.389028	-2.52861	0.0114515	0.255758
ENSG00000024526	DEPDC1	594.146	-0.921479	0.503028	-1.83187	0.0669714	0.479828
ENSG00000024862	CCDC28A	2343.97	0.18418	0.29753	0.619031	0.535896	0.856509
ENSG00000025039	RRAGD	2003.58	0.0930562	0.306684	0.303427	0.761564	0.940428
ENSG00000025156	HSF2	2302.01	0.318644	0.328243	0.970754	0.331671	0.74971
ENSG00000025293	PHF20	3539.19	0.030816	0.196048	0.157186	0.875098	0.973222
ENSG00000025423	HSD17B6	47.7228	-0.493323	0.847076	-0.582383	0.560309	0.867083
ENSG00000025434	NR1H3	1578.12	0.333193	0.254062	1.31147	0.189701	0.631412
ENSG00000025708	TYMP	5469.54	-0.465462	0.527625	-0.882183	0.377678	0.776401
ENSG00000025770	NCAPH2	3952.9	0.0291986	0.27119	0.107669	0.914259	0.980404
ENSG00000025772	TOMM34	3399.34	-0.0857155	0.163763	-0.523413	0.600687	0.881618
ENSG00000025796	SEC63	4199.61	0.15861	0.167467	0.947112	0.343582	0.754457
ENSG00000025800	KPNA6	2599.27	0.119498	0.194643	0.613932	0.53926	0.858067
ENSG00000026025	VIM	12841.2	0.163935	0.415132	0.394899	0.692918	0.91653
ENSG00000026036	RTEL1-TNFRSF6B	51.1206	1.18215	0.793717	1.48938	0.136387	0.57664
ENSG00000026103	FAS	794.79	0.181401	0.304058	0.596601	0.550774	0.86231
ENSG00000026297	RNASET2	4840.66	0.198018	0.358063	0.553026	0.580246	0.873025
ENSG00000026508	CD44	27807	0.3932	0.312823	1.25694	0.208774	0.649237
ENSG00000026559	KCNG1	0.837041	-0.155096	3.0391	-0.0510334	0.959299	NA
ENSG00000026652	AGPAT4	347.326	0.201237	0.380459	0.528932	0.596853	0.879064
ENSG00000026751	SLAMF7	563.145	0.365541	0.573425	0.637468	0.52382	0.850491
ENSG00000026950	BTN3A1	934.653	-0.0927938	0.304209	-0.305033	0.760341	0.940301
ENSG00000027001	MIPEP	1435.58	-1.39717	0.636176	-2.19621	0.0280772	0.363282
ENSG00000027075	PRKCH	3667.59	0.19013	0.38732	0.490885	0.623508	0.89011
ENSG00000027644	INSRR	0.486987	0.367856	3.02024	0.121797	0.90306	NA
ENSG00000027697	IFNGR1	8470.2	0.606628	0.423989	1.43076	0.152498	0.59711
ENSG00000027847	B4GALT7	1607.65	-0.146007	0.244894	-0.596206	0.551037	0.862536
ENSG00000027869	SH2D2A	857.181	-0.278045	0.595216	-0.467132	0.640405	0.896983
ENSG00000028116	VRK2	1959.66	0.135325	0.253327	0.53419	0.59321	0.878266
ENSG00000028137	TNFRSF1B	14771.7	-0.125129	0.409907	-0.305262	0.760166	0.940246
ENSG00000028203	VEZT	2671.95	0.40676	0.327691	1.24129	0.214497	0.654428
ENSG00000028277	POU2F2	744.252	0.188962	0.422505	0.447241	0.654701	0.902061
ENSG00000028310	BRD9	1250.92	-0.302125	0.258335	-1.16951	0.242199	0.678031
ENSG00000028528	SNX1	4916.45	-0.101209	0.18812	-0.538005	0.590574	0.877282
ENSG00000028839	TBPL1	1345.47	0.209965	0.220699	0.951363	0.34142	0.753363
ENSG00000029153	ARNTL2	886.499	-0.787722	0.340889	-2.31079	0.0208447	0.328765
ENSG00000029363	BCLAF1	12703.2	0.00315126	0.211483	0.0149008	0.988111	0.997244
ENSG00000029364	SLC39A9	2470.24	-0.163919	0.158898	-1.0316	0.302259	0.725588
ENSG00000029534	ANK1	2893.06	-1.81655	0.680105	-2.67098	0.007563	0.219721
ENSG00000029559	IBSP	4.5225	0.197643	3.01808	0.0654865	0.947787	NA
ENSG00000029639	TFB1M	449.11	-0.168755	0.446239	-0.378172	0.705303	0.921313
ENSG00000029725	RABEP1	2173.99	-0.161275	0.2699	-0.597538	0.550149	0.861952
ENSG00000029993	HMGB3	3190.24	-0.216451	0.342328	-0.63229	0.527197	0.851944
ENSG00000030066	NUP160	3974.56	-0.302279	0.377237	-0.801296	0.42296	0.799665
ENSG00000030110	BAK1	3223.45	0.472259	0.262188	1.80122	0.0716678	0.486276
ENSG00000030304	MUSK	1.52161	0.0416956	3.02674	0.0137757	0.989009	NA
ENSG00000030419	IKZF2	294.197	-0.686461	0.572279	-1.19952	0.230325	0.667448
ENSG00000030582	GRN	37082.8	0.111222	0.439127	0.253279	0.800052	0.951505
ENSG00000031003	FAM13B	2346.85	-0.0192647	0.233806	-0.0823961	0.934332	0.985558
ENSG00000031081	ARHGAP31	563.564	-0.795912	0.530777	-1.49952	0.133739	0.575358
ENSG00000031691	CENPQ	332.141	-0.184825	0.406717	-0.454431	0.649519	0.899679
ENSG00000031698	SARS	3866.67	0.229307	0.277081	0.827581	0.407908	0.792524
ENSG00000031823	RANBP3	486.876	0.0959829	0.251093	0.382261	0.702268	0.92026
ENSG00000032219	ARID4A	3048.83	0.447318	0.318725	1.40346	0.160479	0.606628
ENSG00000032389	EIPR1	2018.12	-0.748191	0.390376	-1.91659	0.0552898	0.453517
ENSG00000032444	PNPLA6	985.11	-0.417436	0.264969	-1.57541	0.115161	0.548308
ENSG00000032742	IFT88	621.811	-0.0701419	0.392852	-0.178546	0.858295	0.969289
ENSG00000033011	ALG1	1337.33	-0.529755	0.247312	-2.14205	0.0321893	0.381027
ENSG00000033030	ZCCHC8	1291.49	0.561244	0.317924	1.76534	0.0775067	0.494177
ENSG00000033050	ABCF2	601.687	-0.678436	0.304567	-2.22754	0.0259112	0.353691
ENSG00000033100	CHPF2	6276.53	0.0249078	0.297233	0.0837989	0.933216	0.985143
ENSG00000033122	LRRC7	51.9659	-1.21203	0.776928	-1.56003	0.118753	0.551741
ENSG00000033170	FUT8	831.714	-0.439	0.325681	-1.34794	0.177677	0.622775
ENSG00000033178	UBA6	1555.53	0.278336	0.304946	0.912737	0.361381	0.767588
ENSG00000033327	GAB2	2536.38	0.902946	0.483229	1.86857	0.0616828	0.467549
ENSG00000033627	ATP6V0A1	1793.48	-0.189345	0.369637	-0.512245	0.608479	0.884444
ENSG00000033800	PIAS1	6324.62	0.359626	0.249562	1.44103	0.149577	0.59507
ENSG00000033867	SLC4A7	348.104	-0.0126474	0.354793	-0.0356473	0.971564	0.993449
ENSG00000034053	APBA2	810.172	-0.998607	0.912215	-1.09471	0.273645	0.705106
ENSG00000034152	MAP2K3	11061.9	0.276665	0.292632	0.945436	0.344436	0.754987
ENSG00000034239	EFCAB1	20.4199	1.04853	1.56962	0.668014	0.504125	0.841667
ENSG00000034510	TMSB10	25690.6	0.204314	0.360451	0.56683	0.57083	0.87121
ENSG00000034533	ASTE1	542.847	-0.179717	0.267843	-0.670981	0.502233	0.84051
ENSG00000034677	RNF19A	3467.43	0.43979	0.276985	1.58778	0.112337	0.545509
ENSG00000034693	PEX3	1099.86	-0.159091	0.229101	-0.694415	0.487422	0.832848
ENSG00000034713	GABARAPL2	5356.57	0.121577	0.246683	0.492845	0.622122	0.889477
ENSG00000034971	MYOC	3.45108	-1.66014	3.00247	-0.552924	0.580315	NA
ENSG00000035115	SH3YL1	832.713	-0.118674	0.347023	-0.341978	0.732368	0.931777
ENSG00000035141	FAM136A	4923.82	-0.048639	0.197358	-0.246451	0.805333	0.952668
ENSG00000035403	VCL	6462.08	-0.465535	0.188978	-2.46344	0.0137612	0.275111
ENSG00000035499	DEPDC1B	1296.76	-1.10724	0.442302	-2.50336	0.0123021	0.263383
ENSG00000035664	DAPK2	131.503	-1.90148	0.652927	-2.91224	0.00358842	0.156807
ENSG00000035681	NSMAF	5842.29	-0.156179	0.203401	-0.767838	0.442583	0.806549
ENSG00000035687	ADSS	1439.59	-0.267183	0.33107	-0.807027	0.419651	0.798326
ENSG00000035720	STAP1	547.367	0.0693875	0.498566	0.139174	0.889313	0.976454
ENSG00000035862	TIMP2	279.341	1.02947	0.382837	2.68907	0.00716523	0.213298
ENSG00000035928	RFC1	2351.35	0.0249577	0.30504	0.0818178	0.934792	0.985558
ENSG00000036054	TBC1D23	2846.03	0.317782	0.263669	1.20523	0.228115	0.66575
ENSG00000036257	CUL3	4349.14	-0.0310055	0.317357	-0.0976991	0.922171	0.982488
ENSG00000036448	MYOM2	217.699	0.283611	0.472256	0.600545	0.548143	0.861654
ENSG00000036473	OTC	0.0658835	0.71056	3.05963	0.232237	0.816354	NA
ENSG00000036530	CYP46A1	34.1859	0.306918	1.733	0.177103	0.859428	0.969562
ENSG00000036549	AC118549.1	2671.16	0.135184	0.161799	0.83551	0.403431	0.791048
ENSG00000036565	SLC18A1	5.67596	1.36301	3.01551	0.452001	0.651268	NA
ENSG00000036672	USP2	45.9017	-0.503732	1.09842	-0.458597	0.646524	0.89891
ENSG00000036828	CASR	1.91094	-0.0682478	3.02069	-0.0225935	0.981975	NA
ENSG00000037042	TUBG2	339.523	-0.254047	0.253514	-1.0021	0.316295	0.737094
ENSG00000037241	RPL26L1	1162.73	0.107919	0.247006	0.436907	0.662179	0.905159
ENSG00000037280	FLT4	465.644	-0.457083	0.855079	-0.534551	0.59296	0.878266
ENSG00000037474	NSUN2	4273.89	-0.199501	0.251051	-0.794663	0.426809	0.801522
ENSG00000037637	FBXO42	3001.24	0.418298	0.266046	1.57228	0.115886	0.548792
ENSG00000037749	MFAP3	366.148	-0.25796	0.461971	-0.558391	0.576578	0.872332
ENSG00000037757	MRI1	969.62	-0.400874	0.267749	-1.4972	0.134341	0.575649
ENSG00000037897	METTL1	909.456	-0.180433	0.248553	-0.725933	0.46788	0.821616
ENSG00000037965	HOXC8	0	NA	NA	NA	NA	NA
ENSG00000038002	AGA	1773.56	0.199362	0.240503	0.828937	0.40714	0.792391
ENSG00000038210	PI4K2B	1141.98	-0.713849	0.269745	-2.64638	0.00813572	0.227344
ENSG00000038219	BOD1L1	2464.05	0.069764	0.36489	0.191192	0.848375	0.966098
ENSG00000038274	MAT2B	6799.06	-0.320647	0.259478	-1.23574	0.216555	0.655791
ENSG00000038295	TLL1	1.08749	0.23947	3.02172	0.0792497	0.936834	NA
ENSG00000038358	EDC4	3973.97	-0.120283	0.322031	-0.373513	0.708767	0.922248
ENSG00000038382	TRIO	623.682	0.490193	0.391492	1.25212	0.210528	0.651428
ENSG00000038427	VCAN	3439.35	-1.57919	0.682566	-2.31361	0.0206892	0.328323
ENSG00000038532	CLEC16A	1429.93	-0.113298	0.242921	-0.4664	0.64093	0.896989
ENSG00000038945	MSR1	731.608	-0.913261	0.880795	-1.03686	0.299801	0.723967
ENSG00000039068	CDH1	993.799	-0.883106	0.77	-1.14689	0.251427	0.685203
ENSG00000039123	MTREX	3305.49	-0.139999	0.253992	-0.551194	0.581501	0.873354
ENSG00000039139	DNAH5	20.2808	1.19013	2.60666	0.456572	0.647979	0.899594
ENSG00000039319	ZFYVE16	601.236	-0.161479	0.313364	-0.515309	0.606337	0.88362
ENSG00000039523	RIPOR1	1238.79	0.417254	0.325511	1.28184	0.199898	0.642154
ENSG00000039537	C6	0	NA	NA	NA	NA	NA
ENSG00000039560	RAI14	240.146	-0.976195	0.728134	-1.34068	0.180024	0.625095
ENSG00000039600	SOX30	12.4472	0.357722	1.311	0.272863	0.784959	0.946404
ENSG00000039650	PNKP	2331.26	-0.176404	0.22338	-0.7897	0.429703	0.802905
ENSG00000039987	BEST2	0	NA	NA	NA	NA	NA
ENSG00000040199	PHLPP2	263.47	-0.171932	0.333909	-0.514908	0.606617	0.88362
ENSG00000040275	SPDL1	783.403	-0.700196	0.56171	-1.24654	0.212566	0.652651
ENSG00000040341	STAU2	2085.35	-0.361144	0.32021	-1.12783	0.25939	0.693249
ENSG00000040487	PQLC2	594.707	0.368343	0.315439	1.16771	0.242922	0.678406
ENSG00000040531	CTNS	676.017	-0.525531	0.327129	-1.6065	0.108165	0.538724
ENSG00000040608	RTN4R	669.453	-0.407261	0.352447	-1.15553	0.247875	0.681632
ENSG00000040633	PHF23	1411.03	0.170596	0.285124	0.598323	0.549625	0.86186
ENSG00000040731	CDH10	16.2998	3.6723	2.07713	1.76797	0.0770658	0.493974
ENSG00000040933	INPP4A	1221.78	-0.532123	0.270301	-1.96863	0.0489956	0.434421
ENSG00000041353	RAB27B	608.975	-0.601541	0.394156	-1.52615	0.126973	0.564152
ENSG00000041357	PSMA4	10944.9	-0.0720162	0.248774	-0.289485	0.772211	0.943797
ENSG00000041515	MYO16	32.8514	-2.64227	1.31075	-2.01584	0.0438167	0.417723
ENSG00000041802	LSG1	2311.37	-0.0969761	0.21373	-0.453732	0.650022	0.899814
ENSG00000041880	PARP3	1087.71	-0.374679	0.218701	-1.7132	0.0866755	0.505482
ENSG00000041982	TNC	111.246	-0.261295	0.848254	-0.308039	0.758053	0.939983
ENSG00000041988	THAP3	677.287	0.533143	0.283425	1.88107	0.0599621	0.465104
ENSG00000042062	RIPOR3	996.123	-1.05006	0.446603	-2.35122	0.0187118	0.315826
ENSG00000042088	TDP1	2237.59	-0.297699	0.168674	-1.76494	0.0775746	0.494177
ENSG00000042286	AIFM2	210.5	0.291508	0.390465	0.746566	0.455326	0.814175
ENSG00000042304	C2orf83	0	NA	NA	NA	NA	NA
ENSG00000042317	SPATA7	381.314	-0.0988022	0.37864	-0.26094	0.794139	0.949934
ENSG00000042429	MED17	461.264	0.266753	0.419805	0.635422	0.525153	0.850729
ENSG00000042445	RETSAT	844.683	-0.0153188	0.258148	-0.059341	0.95268	0.988875
ENSG00000042493	CAPG	8843.33	-0.0249724	0.269299	-0.0927312	0.926117	0.983504
ENSG00000042753	AP2S1	3557.22	0.12695	0.24176	0.525108	0.599508	0.880546
ENSG00000042781	USH2A	1.40497	1.18018	2.99097	0.394581	0.693152	NA
ENSG00000042813	ZPBP	12.607	1.02223	1.35612	0.753791	0.450975	0.810779
ENSG00000042832	TG	21.9496	-0.303692	1.28131	-0.237017	0.812643	0.9541
ENSG00000042980	ADAM28	2746.27	0.828673	0.286895	2.88842	0.00387183	0.162744
ENSG00000043039	BARX2	0	NA	NA	NA	NA	NA
ENSG00000043093	DCUN1D1	2738.04	0.202927	0.169951	1.19403	0.232467	0.669282
ENSG00000043143	JADE2	1049.61	-0.541669	0.355465	-1.52383	0.127551	0.565213
ENSG00000043355	ZIC2	0	NA	NA	NA	NA	NA
ENSG00000043462	LCP2	6598.97	0.0282759	0.401738	0.0703841	0.943888	0.987029
ENSG00000043514	TRIT1	853.168	-0.209113	0.338488	-0.617786	0.536716	0.857034
ENSG00000043591	ADRB1	118.412	-1.08745	1.07333	-1.01316	0.310985	0.732974
ENSG00000044012	GUCA2B	0	NA	NA	NA	NA	NA
ENSG00000044090	CUL7	923.035	-0.693437	0.310327	-2.23453	0.025448	0.351629
ENSG00000044115	CTNNA1	5508.44	-0.3708	0.320155	-1.15819	0.246786	0.681234
ENSG00000044446	PHKA2	1378.14	-0.453913	0.240446	-1.8878	0.0590531	0.462278
ENSG00000044459	CNTLN	1399.48	-0.410847	0.340867	-1.2053	0.228088	0.66575
ENSG00000044524	EPHA3	2.03259	0.424144	3.0263	0.140153	0.888539	NA
ENSG00000044574	HSPA5	106244	0.602588	0.336713	1.78962	0.0735151	0.489025
ENSG00000046604	DSG2	1880.39	-0.823755	0.486361	-1.69371	0.09032	0.512013
ENSG00000046647	GEMIN8	763.101	-0.272702	0.213505	-1.27726	0.201509	0.64298
ENSG00000046651	OFD1	1684.88	-0.00159688	0.23891	-0.00668399	0.994667	0.998343
ENSG00000046653	GPM6B	366.564	-0.0568131	0.676275	-0.0840089	0.933049	0.985143
ENSG00000046774	MAGEC2	0	NA	NA	NA	NA	NA
ENSG00000046889	PREX2	175.246	-1.02734	0.870732	-1.17985	0.238058	0.674302
ENSG00000047056	WDR37	1728.78	0.373963	0.339349	1.102	0.270462	0.70244
ENSG00000047188	YTHDC2	844.316	0.0815603	0.303787	0.268478	0.788331	0.947628
ENSG00000047230	CTPS2	1263.81	-0.414919	0.290925	-1.42621	0.153809	0.598583
ENSG00000047249	ATP6V1H	3858.3	0.413908	0.24486	1.69038	0.0909546	0.513385
ENSG00000047315	POLR2B	3683.43	-0.150165	0.312015	-0.481276	0.63032	0.892939
ENSG00000047346	FAM214A	851.411	0.615974	0.256378	2.4026	0.0162791	0.297028
ENSG00000047365	ARAP2	1878.92	0.722567	0.358687	2.01448	0.0439592	0.417723
ENSG00000047410	TPR	5540.02	0.0328251	0.269938	0.121602	0.903214	0.97895
ENSG00000047457	CP	129.002	-1.07968	0.976954	-1.10515	0.269096	0.700856
ENSG00000047578	KIAA0556	413.699	0.565553	0.303775	1.86175	0.0626384	0.469921
ENSG00000047579	DTNBP1	2023.49	0.103386	0.232245	0.445158	0.656205	0.902898
ENSG00000047597	XK	666.241	-1.16296	0.634788	-1.83205	0.0669437	0.479828
ENSG00000047617	ANO2	0.922369	0.81209	3.03891	0.267231	0.789291	NA
ENSG00000047621	C12orf4	852.217	0.208706	0.269447	0.774572	0.438593	0.804648
ENSG00000047634	SCML1	145.476	0.896425	0.617062	1.45273	0.146299	0.590313
ENSG00000047644	WWC3	1203.39	-0.187976	0.369544	-0.508669	0.610984	0.885094
ENSG00000047648	ARHGAP6	142.409	-0.000320458	0.644523	-0.000497202	0.999603	0.999949
ENSG00000047662	FAM184B	32.0535	1.05074	0.561809	1.87028	0.0614453	0.467354
ENSG00000047849	MAP4	3047	0.0542073	0.204959	0.264479	0.791411	0.948864
ENSG00000047932	GOPC	1034.13	-0.380831	0.439741	-0.866034	0.386471	0.782014
ENSG00000047936	ROS1	0.495455	-0.101894	3.03989	-0.033519	0.973261	NA
ENSG00000048028	USP28	738.351	-0.274919	0.641931	-0.428269	0.668455	0.907534
ENSG00000048052	HDAC9	965.854	-0.547064	0.563301	-0.971175	0.331461	0.749686
ENSG00000048140	TSPAN17	2248.78	-0.418543	0.251554	-1.66383	0.096147	0.52113
ENSG00000048162	NOP16	1635.75	-0.338144	0.327781	-1.03162	0.302252	0.725588
ENSG00000048342	CC2D2A	26.7294	-0.335133	0.995887	-0.336517	0.736481	0.932269
ENSG00000048392	RRM2B	2840.21	0.0219758	0.315885	0.0695688	0.944537	0.987336
ENSG00000048405	ZNF800	3645.04	0.349326	0.295914	1.1805	0.237802	0.673945
ENSG00000048462	TNFRSF17	45.3338	-0.507078	0.980922	-0.516941	0.605198	0.88346
ENSG00000048471	SNX29	678.285	0.159622	0.280039	0.569997	0.56868	0.87028
ENSG00000048540	LMO3	2.19775	3.4891	3.00149	1.16246	0.24505	NA
ENSG00000048544	MRPS10	3703.01	-0.0367195	0.161038	-0.228018	0.819632	0.955293
ENSG00000048545	GUCA1A	1.64159	0.731163	3.03825	0.240653	0.809824	NA
ENSG00000048649	RSF1	2078.17	0.348929	0.305553	1.14196	0.25347	0.687128
ENSG00000048707	VPS13D	751.911	0.436413	0.31168	1.4002	0.161455	0.60792
ENSG00000048740	CELF2	11455	-0.18972	0.187395	-1.01241	0.311343	0.733341
ENSG00000048828	FAM120A	1312.24	-0.263246	0.278503	-0.945219	0.344547	0.754987
ENSG00000048991	R3HDM1	2225.53	-0.558598	0.260864	-2.14134	0.0322467	0.381027
ENSG00000049089	COL9A2	996.84	0.610744	0.440672	1.38594	0.165766	0.611424
ENSG00000049130	KITLG	41.4644	-2.51965	1.21518	-2.07349	0.038127	0.399488
ENSG00000049167	ERCC8	770.588	-0.277732	0.263909	-1.05238	0.292625	0.718269
ENSG00000049192	ADAMTS6	32.6935	-0.286461	0.800698	-0.357764	0.72052	0.927789
ENSG00000049239	H6PD	2647.08	-0.711766	0.334827	-2.12577	0.0335221	0.38523
ENSG00000049245	VAMP3	6251.75	0.19405	0.328116	0.591406	0.554248	0.864759
ENSG00000049246	PER3	277.023	-1.05836	0.628267	-1.68457	0.0920715	0.515588
ENSG00000049247	UTS2	8.29646	-0.510487	1.06305	-0.480211	0.631077	0.893242
ENSG00000049249	TNFRSF9	186.872	1.81931	1.15501	1.57515	0.115222	0.548308
ENSG00000049283	EPN3	8.57831	-1.15297	2.25868	-0.510465	0.609726	0.884933
ENSG00000049323	LTBP1	2256.7	-1.03559	0.435759	-2.37652	0.017477	0.305055
ENSG00000049449	RCN1	1873.45	0.282688	0.184087	1.53562	0.124631	0.562022
ENSG00000049540	ELN	1541.76	0.163228	0.37828	0.4315	0.666104	0.906565
ENSG00000049541	RFC2	4879.81	-0.42568	0.261563	-1.62744	0.103643	0.532621
ENSG00000049618	ARID1B	5162.72	0.0322273	0.280738	0.114795	0.908608	0.979756
ENSG00000049656	CLPTM1L	7002.43	-0.651758	0.326686	-1.99506	0.0460364	0.422979
ENSG00000049759	NEDD4L	1492.19	0.0785535	0.419321	0.187335	0.851398	0.96731
ENSG00000049768	FOXP3	11.7287	1.00816	1.72039	0.586003	0.557873	0.866321
ENSG00000049769	PPP1R3F	313.92	-0.26808	0.31575	-0.849026	0.395867	0.78665
ENSG00000049860	HEXB	7334.8	0.0673664	0.360833	0.186697	0.851898	0.967625
ENSG00000049883	PTCD2	456.567	-0.4386	0.366029	-1.19827	0.230814	0.667673
ENSG00000050030	NEXMIF	10.9351	0.644612	2.75394	0.234069	0.814932	0.9541
ENSG00000050130	JKAMP	2825.74	0.222735	0.115309	1.93165	0.0534029	0.446689
ENSG00000050165	DKK3	12.1088	0.557142	1.34	0.415777	0.677573	0.910723
ENSG00000050327	ARHGEF5	98.8067	-0.642987	0.778589	-0.825837	0.408897	0.793128
ENSG00000050344	NFE2L3	1283.01	-0.226265	0.498509	-0.453883	0.649913	0.899742
ENSG00000050393	MCUR1	2471.69	-0.151413	0.209831	-0.721593	0.470545	0.824119
ENSG00000050405	LIMA1	790.911	-0.430637	0.339212	-1.26952	0.204255	0.645793
ENSG00000050426	LETMD1	1270.55	0.355946	0.228211	1.55972	0.118826	0.551752
ENSG00000050438	SLC4A8	239.61	0.585189	0.620913	0.942466	0.345954	0.756407
ENSG00000050555	LAMC3	97.7524	0.364226	1.05252	0.34605	0.729305	0.931144
ENSG00000050628	PTGER3	90.8043	-1.28073	0.904699	-1.41564	0.15688	0.602048
ENSG00000050730	TNIP3	9.54447	-0.713969	2.95855	-0.241324	0.809304	0.953534
ENSG00000050748	MAPK9	2610.76	-0.400948	0.242403	-1.65406	0.0981157	0.524902
ENSG00000050767	COL23A1	698.215	0.58258	0.666215	0.874463	0.381866	0.780172
ENSG00000050820	BCAR1	580.555	-0.65159	0.900893	-0.723271	0.469513	0.822935
ENSG00000051009	FAM160A2	1593.99	0.272822	0.270195	1.00972	0.312629	0.734702
ENSG00000051108	HERPUD1	8448.59	0.104741	0.312833	0.334816	0.737764	0.932818
ENSG00000051128	HOMER3	1104.15	-0.327356	0.639175	-0.512153	0.608544	0.884444
ENSG00000051180	RAD51	13.6763	-0.384075	0.644284	-0.596126	0.551091	0.862558
ENSG00000051341	POLQ	379.317	-1.11689	0.684214	-1.63237	0.102602	0.53245
ENSG00000051382	PIK3CB	2738.57	0.119336	0.217841	0.54781	0.583822	0.874357
ENSG00000051523	CYBA	27712.2	0.0675459	0.304176	0.222062	0.824266	0.957128
ENSG00000051596	THOC3	1711.2	-0.754665	0.358209	-2.10677	0.0351373	0.389837
ENSG00000051620	HEBP2	4198.77	0.112369	0.223072	0.503732	0.61445	0.886274
ENSG00000051825	MPHOSPH9	2068.12	-0.464635	0.274042	-1.69549	0.0899829	0.511452
ENSG00000052126	PLEKHA5	1605.9	-0.120065	0.429962	-0.279245	0.780057	0.945593
ENSG00000052344	PRSS8	13.1449	1.98889	1.43836	1.38275	0.166741	0.611776
ENSG00000052723	SIKE1	1863.49	-0.128481	0.197821	-0.649484	0.516025	0.846896
ENSG00000052749	RRP12	6296.93	-0.487755	0.363058	-1.34346	0.179122	0.62375
ENSG00000052795	FNIP2	2584.37	-0.0343609	0.486886	-0.0705729	0.943738	0.987029
ENSG00000052802	MSMO1	1498.91	0.303793	0.427297	0.710964	0.477107	0.827587
ENSG00000052841	TTC17	4540.36	-0.464311	0.320831	-1.44721	0.147837	0.593019
ENSG00000052850	ALX4	0.173427	0.847982	3.0545	0.277618	0.781306	NA
ENSG00000053108	FSTL4	11.3551	-0.884395	1.7854	-0.495347	0.620355	0.888541
ENSG00000053254	FOXN3	6839.56	-0.289126	0.255825	-1.13017	0.258404	0.691906
ENSG00000053328	METTL24	45.2511	-1.23714	0.876502	-1.41146	0.15811	0.603211
ENSG00000053371	AKR7A2	6424.68	-0.370846	0.308801	-1.20092	0.229781	0.667254
ENSG00000053372	MRTO4	3116.76	-0.543148	0.295298	-1.83932	0.0658681	0.477776
ENSG00000053438	NNAT	172.008	0.0834983	0.484336	0.172398	0.863125	0.970485
ENSG00000053501	USE1	1399.49	0.0995574	0.22755	0.437518	0.661735	0.905089
ENSG00000053524	MCF2L2	97.3323	-0.710566	0.533382	-1.33219	0.182797	0.627014
ENSG00000053702	NRIP2	112.643	-0.216395	0.524301	-0.41273	0.679804	0.911499
ENSG00000053747	LAMA3	28.8658	-2.34365	1.22969	-1.90589	0.056665	0.457334
ENSG00000053770	AP5M1	2499.48	0.258758	0.27012	0.957936	0.338095	0.752396
ENSG00000053900	ANAPC4	1867.73	-0.139623	0.230306	-0.60625	0.544348	0.86057
ENSG00000053918	KCNQ1	1086.11	-0.876956	0.505347	-1.73535	0.0826782	0.499595
ENSG00000054116	TRAPPC3	3971.53	-0.0466778	0.16606	-0.281089	0.778642	0.944919
ENSG00000054118	THRAP3	10100.9	0.05827	0.187589	0.310626	0.756085	0.939084
ENSG00000054148	PHPT1	2896.32	0.0932305	0.263043	0.35443	0.723017	0.928433
ENSG00000054179	ENTPD2	0.617969	-0.182722	3.04025	-0.0601009	0.952075	NA
ENSG00000054219	LY75	873.407	-0.801236	0.332254	-2.41152	0.0158862	0.293558
ENSG00000054267	ARID4B	5120.1	0.465185	0.362876	1.28194	0.199864	0.642154
ENSG00000054277	OPN3	368.378	-0.827502	0.724818	-1.14167	0.253592	0.687149
ENSG00000054282	SDCCAG8	2447.43	0.219019	0.258526	0.847186	0.396892	0.786904
ENSG00000054356	PTPRN	14.0716	0.114528	1.02489	0.111747	0.911024	0.979965
ENSG00000054392	HHAT	447.034	-0.563104	0.343849	-1.63765	0.101495	0.53081
ENSG00000054523	KIF1B	1158.18	0.181284	0.364458	0.497409	0.618901	0.887381
ENSG00000054598	FOXC1	1496.32	0.382279	0.70112	0.545241	0.585588	0.875561
ENSG00000054611	TBC1D22A	1742.87	-0.217518	0.230649	-0.943071	0.345645	0.756244
ENSG00000054654	SYNE2	311.4	-1.12074	0.453504	-2.4713	0.0134622	0.272898
ENSG00000054690	PLEKHH1	5.41651	0.689557	2.07626	0.332115	0.739803	NA
ENSG00000054793	ATP9A	301.6	0.822665	0.764751	1.07573	0.282048	0.711207
ENSG00000054796	SPO11	0	NA	NA	NA	NA	NA
ENSG00000054803	CBLN4	0	NA	NA	NA	NA	NA
ENSG00000054938	CHRDL2	2.08297	0.10653	3.02773	0.0351849	0.971932	NA
ENSG00000054965	FAM168A	415.394	0.275324	0.298478	0.922428	0.356306	0.764653
ENSG00000054967	RELT	1772.62	0.700756	0.350641	1.9985	0.0456623	0.422629
ENSG00000054983	GALC	2259.38	-0.632104	0.175047	-3.61105	0.000304956	0.038338
ENSG00000055044	NOP58	10520.6	-0.35681	0.271493	-1.31425	0.188762	0.631244
ENSG00000055070	SZRD1	3613.19	0.480368	0.194684	2.46742	0.013609	0.273578
ENSG00000055118	KCNH2	4108.17	-1.88867	0.667143	-2.83098	0.00464051	0.175734
ENSG00000055130	CUL1	4614.04	-0.288924	0.146425	-1.97319	0.0484744	0.432878
ENSG00000055147	FAM114A2	1125.78	-0.89649	0.493313	-1.81728	0.0691738	0.482123
ENSG00000055163	CYFIP2	9827.5	-0.147966	0.320893	-0.461108	0.644721	0.898105
ENSG00000055208	TAB2	1235.7	0.215999	0.259004	0.833961	0.404303	0.791595
ENSG00000055211	GINM1	2417.23	0.581019	0.258796	2.24508	0.0247629	0.349488
ENSG00000055332	EIF2AK2	5860.62	0.233602	0.347042	0.673124	0.500869	0.839983
ENSG00000055483	USP36	5212.3	0.342217	0.323824	1.0568	0.290602	0.717447
ENSG00000055609	KMT2C	3816.34	0.263574	0.419514	0.628284	0.529818	0.853103
ENSG00000055732	MCOLN3	0.658835	0.809979	3.03975	0.266462	0.789883	NA
ENSG00000055813	CCDC85A	4.17115	-1.22139	2.97728	-0.410237	0.681632	NA
ENSG00000055917	PUM2	2798.6	0.192148	0.270761	0.709661	0.477915	0.827939
ENSG00000055950	MRPL43	1875.15	-0.0785274	0.227313	-0.345459	0.729749	0.931144
ENSG00000055955	ITIH4	4.95828	1.37742	2.55508	0.539092	0.589823	NA
ENSG00000055957	ITIH1	6.43098	0.222811	2.99404	0.074418	0.940678	NA
ENSG00000056050	HPF1	1152.48	-0.369935	0.452852	-0.816901	0.413985	0.796087
ENSG00000056097	ZFR	8136.88	0.233558	0.214547	1.08861	0.276326	0.706698
ENSG00000056277	ZNF280C	274.61	-1.06922	0.689811	-1.55002	0.121136	0.555063
ENSG00000056291	NPFFR2	0	NA	NA	NA	NA	NA
ENSG00000056487	PHF21B	0	NA	NA	NA	NA	NA
ENSG00000056558	TRAF1	310.094	1.27574	0.56826	2.24499	0.0247686	0.349488
ENSG00000056586	RC3H2	2793.22	0.495865	0.30598	1.62058	0.105108	0.534609
ENSG00000056736	IL17RB	37.3156	-0.184604	0.777192	-0.237527	0.812248	0.9541
ENSG00000056972	TRAF3IP2	1297.38	0.530815	0.283449	1.8727	0.0611096	0.467282
ENSG00000056998	GYG2	126.243	-1.6142	0.841996	-1.91711	0.0552244	0.453517
ENSG00000057019	DCBLD2	508.536	0.0622582	0.394984	0.157622	0.874755	0.973208
ENSG00000057149	SERPINB3	2.83286	0.353578	3.0374	0.116408	0.907329	NA
ENSG00000057252	SOAT1	2222.54	0.0500214	0.388049	0.128905	0.897433	0.978114
ENSG00000057294	PKP2	1367.72	-0.597319	0.617182	-0.967817	0.333136	0.750279
ENSG00000057468	MSH4	4.33522	0.928628	2.69765	0.344236	0.730669	NA
ENSG00000057593	F7	12.0504	1.64847	3.01759	0.546287	0.584869	0.875128
ENSG00000057608	GDI2	16489.7	0.0345505	0.237071	0.145739	0.884127	0.975271
ENSG00000057657	PRDM1	588.763	0.137125	0.835543	0.164115	0.869641	0.972535
ENSG00000057663	ATG5	2632.38	0.308504	0.185984	1.65877	0.0971621	0.523408
ENSG00000057704	TMCC3	465.063	-1.07685	0.50238	-2.14349	0.032074	0.380874
ENSG00000057757	PITHD1	4500.18	0.178907	0.199522	0.896679	0.36989	0.771882
ENSG00000057935	MTA3	413.315	-0.0404655	0.21805	-0.185579	0.852775	0.967951
ENSG00000058056	USP13	1056.41	-1.05815	0.639596	-1.6544	0.0980462	0.524902
ENSG00000058063	ATP11B	3245.23	0.452544	0.224197	2.01851	0.0435385	0.417535
ENSG00000058085	LAMC2	1.34619	0.407826	3.02635	0.134758	0.892803	NA
ENSG00000058091	CDK14	604.743	-0.795916	0.356096	-2.23511	0.0254099	0.351624
ENSG00000058262	SEC61A1	15714.7	-0.279411	0.121479	-2.30007	0.0214444	0.332862
ENSG00000058272	PPP1R12A	5140.66	0.0685144	0.218123	0.314109	0.753438	0.938117
ENSG00000058335	RASGRF1	10.4194	-1.94044	1.59043	-1.22007	0.222438	0.660903
ENSG00000058404	CAMK2B	13.2743	0.732035	1.90156	0.384966	0.700263	0.9193
ENSG00000058453	CROCC	874.074	-1.07215	0.275837	-3.88689	0.000101537	0.0200362
ENSG00000058600	POLR3E	2641.33	-0.0733167	0.337785	-0.217051	0.828169	0.958815
ENSG00000058668	ATP2B4	2741.39	-0.728206	0.292124	-2.4928	0.012674	0.264308
ENSG00000058673	ZC3H11A	2.98339	-1.39148	1.17316	-1.18609	0.235585	NA
ENSG00000058729	RIOK2	1965.23	-0.0785192	0.17947	-0.437507	0.661743	0.905089
ENSG00000058799	YIPF1	1099.89	0.140903	0.201092	0.700692	0.483495	0.831681
ENSG00000058804	NDC1	2297.09	-1.30226	0.550286	-2.36652	0.0179563	0.310074
ENSG00000058866	DGKG	512.774	-0.20667	0.440741	-0.468916	0.63913	0.896983
ENSG00000059122	FLYWCH1	2637.62	-0.0157306	0.212922	-0.0738797	0.941106	0.986546
ENSG00000059145	UNKL	442.036	0.288389	0.339988	0.848234	0.396308	0.786871
ENSG00000059377	TBXAS1	4399.67	-0.545442	0.404629	-1.34801	0.177657	0.622775
ENSG00000059378	PARP12	1709.06	-0.794994	0.464101	-1.71298	0.0867165	0.505482
ENSG00000059573	ALDH18A1	8678.47	-0.751618	0.329688	-2.27978	0.0226205	0.339713
ENSG00000059588	TARBP1	3022.59	-0.56204	0.412195	-1.36353	0.172715	0.6186
ENSG00000059691	GATB	2057.74	-0.756643	0.372393	-2.03184	0.0421697	0.415506
ENSG00000059728	MXD1	8180.19	0.518906	0.368295	1.40894	0.158853	0.60378
ENSG00000059758	CDK17	3603.64	0.0341081	0.232666	0.146597	0.88345	0.975206
ENSG00000059769	DNAJC25	770.045	0.321944	0.346274	0.929738	0.352507	0.761843
ENSG00000059804	SLC2A3	36194.7	0.202992	0.603248	0.336499	0.736495	0.932269
ENSG00000059915	PSD	177.001	-0.0208718	0.399276	-0.052274	0.95831	0.990213
ENSG00000060069	CTDP1	5133.9	-0.27128	0.403576	-0.67219	0.501463	0.840288
ENSG00000060138	YBX3	48651.3	0.175092	0.324985	0.538769	0.590046	0.877188
ENSG00000060140	STYK1	118.337	-3.10533	0.915849	-3.39066	0.000697244	0.0634782
ENSG00000060237	WNK1	2734.45	-0.116633	0.211476	-0.551518	0.581278	0.873203
ENSG00000060303	RPS17P5	13.4745	1.05419	0.509968	2.06717	0.0387185	0.401394
ENSG00000060339	CCAR1	5356.71	0.164047	0.285395	0.574808	0.565421	0.868882
ENSG00000060491	OGFR	4531.2	-0.0693527	0.41489	-0.167159	0.867245	0.971498
ENSG00000060558	GNA15	34325.7	0.573399	0.443614	1.29256	0.196162	0.638539
ENSG00000060566	CREB3L3	77.6223	0.61079	1.00448	0.608068	0.543142	0.860101
ENSG00000060642	PIGV	787.997	-0.991098	0.604294	-1.64009	0.100986	0.53016
ENSG00000060656	PTPRU	51.4121	-0.568614	1.15951	-0.49039	0.623858	0.89011
ENSG00000060688	SNRNP40	5594.91	-0.160525	0.231281	-0.694068	0.48764	0.832986
ENSG00000060709	RIMBP2	10.2652	-0.304813	2.99271	-0.101852	0.918874	0.981586
ENSG00000060718	COL11A1	10.2893	-0.335654	2.99271	-0.112158	0.910699	0.979965
ENSG00000060749	QSER1	381.333	-0.161851	0.572094	-0.282909	0.777246	0.944655
ENSG00000060762	MPC1	2466.36	0.364817	0.256561	1.42195	0.155041	0.600747
ENSG00000060971	ACAA1	3328.17	-0.104709	0.172538	-0.606879	0.543931	0.860337
ENSG00000060982	BCAT1	4666.48	-0.711014	0.340932	-2.0855	0.0370236	0.395945
ENSG00000061273	HDAC7	3558.79	-0.70581	0.329239	-2.14376	0.0320519	0.380874
ENSG00000061337	LZTS1	3.80887	1.47494	3.00132	0.491429	0.623123	NA
ENSG00000061455	PRDM6	0.106346	0.811163	3.0522	0.265763	0.790422	NA
ENSG00000061492	WNT8A	20.7842	-1.83583	1.45759	-1.25949	0.207853	0.648694
ENSG00000061656	SPAG4	144.466	-0.164007	0.452711	-0.362277	0.717145	0.925597
ENSG00000061676	NCKAP1	132.934	-0.260613	0.620746	-0.419838	0.674604	0.910152
ENSG00000061794	MRPS35	5492.02	-0.10561	0.215259	-0.490616	0.623698	0.89011
ENSG00000061918	GUCY1B1	1754.93	-0.948064	0.265326	-3.5732	0.000352647	0.0425743
ENSG00000061936	SFSWAP	2151.9	0.348177	0.312447	1.11436	0.265127	0.6977
ENSG00000061938	TNK2	730.205	0.195826	0.318314	0.615198	0.538424	0.857784
ENSG00000061987	MON2	1744.75	0.370737	0.214865	1.72545	0.084447	0.503098
ENSG00000062038	CDH3	11.2856	-2.19891	1.97597	-1.11283	0.265783	0.698112
ENSG00000062096	ARSF	0.329417	0.802805	3.04265	0.263851	0.791895	NA
ENSG00000062194	GPBP1	7068.87	0.27363	0.247418	1.10594	0.268751	0.700409
ENSG00000062282	DGAT2	451.514	-0.953024	0.371267	-2.56695	0.0102598	0.248227
ENSG00000062370	ZNF112	141.678	-2.19988	1.12103	-1.96237	0.0497192	0.434953
ENSG00000062485	CS	9418.19	-0.102676	0.1914	-0.536449	0.591648	0.877978
ENSG00000062524	LTK	59.5865	-2.91161	1.25585	-2.31844	0.0204253	0.327537
ENSG00000062582	MRPS24	22.7378	0.0233335	0.829771	0.0281204	0.977566	0.995596
ENSG00000062598	ELMO2	2353.6	0.367813	0.269419	1.36521	0.172187	0.618371
ENSG00000062650	WAPL	6106.84	0.0876834	0.222712	0.393707	0.693797	0.916739
ENSG00000062716	VMP1	6652.77	0.327086	0.277651	1.17805	0.238777	0.674737
ENSG00000062725	APPBP2	1345.56	0.0786085	0.278615	0.28214	0.777836	0.944655
ENSG00000062822	POLD1	7384.27	-0.784877	0.312756	-2.50955	0.0120884	0.261076
ENSG00000063015	SEZ6	179.082	1.18784	0.744512	1.59546	0.110609	0.542299
ENSG00000063046	EIF4B	9464.88	0.208063	0.164519	1.26468	0.205988	0.647003
ENSG00000063127	SLC6A16	45.9225	0.130527	0.8676	0.150446	0.880413	0.974522
ENSG00000063169	BICRA	177.4	0.468625	0.492396	0.951725	0.341236	0.753363
ENSG00000063176	SPHK2	894.529	-0.59342	0.215296	-2.7563	0.00584598	0.194616
ENSG00000063177	RPL18	25521.3	0.284966	0.216093	1.31872	0.187262	0.630881
ENSG00000063180	CA11	60.4628	0.50015	0.922255	0.542312	0.587603	0.876122
ENSG00000063241	ISOC2	2966.98	-0.656503	0.378274	-1.73552	0.082648	0.499595
ENSG00000063244	U2AF2	801.515	0.265682	0.207046	1.2832	0.199421	0.642106
ENSG00000063245	EPN1	3304.59	0.0981036	0.339767	0.288738	0.772782	0.944082
ENSG00000063322	MED29	3965.73	-0.18334	0.140924	-1.30098	0.193264	0.636239
ENSG00000063438	AHRR	23.1703	0.983197	2.01664	0.487542	0.625874	0.891218
ENSG00000063515	GSC2	0	NA	NA	NA	NA	NA
ENSG00000063587	ZNF275	495.866	0.432416	0.540574	0.79992	0.423757	0.799984
ENSG00000063601	MTMR1	1289.79	0.0211605	0.311322	0.0679697	0.94581	0.987837
ENSG00000063660	GPC1	119.557	-0.343842	0.683232	-0.503258	0.614783	0.88634
ENSG00000063761	ADCK1	298.911	-1.09102	0.692973	-1.5744	0.115395	0.548308
ENSG00000063854	HAGH	1256.7	-0.49109	0.333652	-1.47186	0.141058	0.583875
ENSG00000063978	RNF4	5188.21	0.134675	0.261369	0.515268	0.606366	0.88362
ENSG00000064012	CASP8	3640.81	0.535271	0.38864	1.37729	0.168422	0.613301
ENSG00000064042	LIMCH1	240.645	0.633523	0.777643	0.814671	0.41526	0.796609
ENSG00000064102	INTS13	2301.57	-0.0713009	0.324639	-0.219632	0.826158	0.957913
ENSG00000064115	TM7SF3	19211.7	-0.522416	0.384878	-1.35735	0.174669	0.620209
ENSG00000064195	DLX3	2.54888	-0.0747575	3.03728	-0.0246133	0.980363	NA
ENSG00000064199	SPA17	39.1507	-0.411467	0.679288	-0.605733	0.544692	0.860664
ENSG00000064201	TSPAN32	3688.5	0.343423	0.391757	0.876622	0.380692	0.779131
ENSG00000064205	WISP2	1.43567	0.848493	3.03801	0.279293	0.78002	NA
ENSG00000064218	DMRT3	0	NA	NA	NA	NA	NA
ENSG00000064225	ST3GAL6	906.396	0.524261	0.397837	1.31778	0.187577	0.631007
ENSG00000064270	ATP2C2	17.1067	-5.2634	1.53842	-3.4213	0.000623222	0.0604768
ENSG00000064300	NGFR	69.7971	-2.0736	0.851748	-2.43452	0.0149116	0.284584
ENSG00000064309	CDON	12.9736	-0.646664	1.91185	-0.338239	0.735183	0.931883
ENSG00000064313	TAF2	2026.99	0.3273	0.278685	1.17444	0.240217	0.675924
ENSG00000064393	HIPK2	1373.87	0.134579	0.376946	0.357025	0.721073	0.927855
ENSG00000064419	TNPO3	3247.75	-0.445766	0.22119	-2.01531	0.0438723	0.417723
ENSG00000064489	BORCS8-MEF2B	0.141604	-0.0543861	3.04586	-0.0178558	0.985754	NA
ENSG00000064490	RFXANK	2217	-0.230401	0.189762	-1.21416	0.224687	0.663376
ENSG00000064545	TMEM161A	2137.04	-0.300562	0.249746	-1.20347	0.228795	0.666568
ENSG00000064547	LPAR2	795.941	0.774861	0.463595	1.67142	0.0946391	0.518358
ENSG00000064601	CTSA	9283.42	-0.0419395	0.317268	-0.13219	0.894834	0.977985
ENSG00000064607	SUGP2	3252.39	0.0115601	0.294528	0.0392496	0.968691	0.993095
ENSG00000064651	SLC12A2	1122.07	-0.709819	0.390656	-1.81699	0.0692182	0.482123
ENSG00000064652	SNX24	170.001	-0.618455	0.632386	-0.97797	0.328089	0.746878
ENSG00000064655	EYA2	0.531729	0.842808	3.0401	0.277231	0.781603	NA
ENSG00000064666	CNN2	14630.1	0.0147771	0.245125	0.060284	0.951929	0.988875
ENSG00000064687	ABCA7	1246.92	-0.633975	0.316173	-2.00515	0.0449467	0.420385
ENSG00000064692	SNCAIP	33.7747	-1.08804	2.9544	-0.368278	0.712666	0.923792
ENSG00000064703	DDX20	2423.35	0.0285688	0.146722	0.194715	0.845616	0.965881
ENSG00000064726	BTBD1	5655.89	-0.0337957	0.144515	-0.233856	0.815097	0.9541
ENSG00000064763	FAR2	2024.58	-0.612025	0.388206	-1.57655	0.1149	0.548166
ENSG00000064787	BCAS1	4.27064	-2.54164	2.80678	-0.905535	0.365182	NA
ENSG00000064835	POU1F1	0	NA	NA	NA	NA	NA
ENSG00000064886	CHI3L2	77.4444	-2.43943	0.923783	-2.64069	0.00827364	0.227859
ENSG00000064932	SBNO2	552.956	0.736216	0.358967	2.05093	0.040274	0.408396
ENSG00000064933	PMS1	1560.59	-0.511745	0.460132	-1.11217	0.266065	0.698163
ENSG00000064961	HMG20B	6634.32	-0.141443	0.157373	-0.898776	0.368772	0.771578
ENSG00000064989	CALCRL	1061.22	0.529119	0.661165	0.800283	0.423547	0.799984
ENSG00000064995	TAF11	1462.93	0.559458	0.20942	2.67146	0.00755215	0.219721
ENSG00000064999	ANKS1A	798.938	-0.378272	0.24427	-1.54858	0.121482	0.55589
ENSG00000065000	AP3D1	4659.47	-0.286623	0.252106	-1.13692	0.255573	0.688234
ENSG00000065029	ZNF76	2124.35	-0.11788	0.1941	-0.607316	0.543641	0.860337
ENSG00000065054	SLC9A3R2	521.874	0.00257662	0.399294	0.00645294	0.994851	0.998343
ENSG00000065057	NTHL1	1080.17	-0.711348	0.389276	-1.82736	0.0676456	0.480394
ENSG00000065060	UHRF1BP1	1291.32	0.644278	0.321132	2.00627	0.0448271	0.420024
ENSG00000065135	GNAI3	12265.6	0.0881496	0.180747	0.487696	0.625765	0.891121
ENSG00000065150	IPO5	7959.47	-0.126951	0.188742	-0.672615	0.501193	0.8402
ENSG00000065154	OAT	9769.06	-0.186834	0.339185	-0.550834	0.581748	0.873486
ENSG00000065183	WDR3	1554.42	-0.894904	0.472752	-1.89297	0.0583623	0.461022
ENSG00000065243	PKN2	1852.58	0.493168	0.319505	1.54354	0.1227	0.558125
ENSG00000065268	WDR18	7225.85	-0.438596	0.268572	-1.63307	0.102454	0.532129
ENSG00000065308	TRAM2	912.577	-0.373241	0.308409	-1.21021	0.226198	0.664519
ENSG00000065320	NTN1	101.034	1.10087	0.524945	2.09712	0.035983	0.391982
ENSG00000065325	GLP2R	0	NA	NA	NA	NA	NA
ENSG00000065328	MCM10	1808.49	-0.719528	0.425981	-1.68911	0.0911986	0.513832
ENSG00000065357	DGKA	1708.58	-0.110663	0.271047	-0.408279	0.683069	0.912402
ENSG00000065361	ERBB3	6.38105	0.411005	2.7391	0.150051	0.880724	NA
ENSG00000065371	ROPN1	0	NA	NA	NA	NA	NA
ENSG00000065413	ANKRD44	971.817	-0.614458	0.373076	-1.647	0.0995571	0.527527
ENSG00000065427	KARS	16424.6	-0.076072	0.159266	-0.477641	0.632906	0.89406
ENSG00000065457	ADAT1	852.082	-0.369779	0.209538	-1.76474	0.0776076	0.494177
ENSG00000065485	PDIA5	2474.45	-0.557753	0.265156	-2.10349	0.0354228	0.390008
ENSG00000065491	TBC1D22B	1571.09	0.122607	0.24707	0.496246	0.619721	0.887893
ENSG00000065518	NDUFB4	3127.29	0.169686	0.129781	1.30748	0.191049	0.633014
ENSG00000065526	SPEN	4694.12	0.214593	0.353576	0.606922	0.543903	0.860337
ENSG00000065534	MYLK	798.137	-0.680724	0.397441	-1.71276	0.0867558	0.505575
ENSG00000065548	ZC3H15	6920.75	0.446084	0.239914	1.85935	0.0629781	0.470499
ENSG00000065559	MAP2K4	1347.37	-0.358016	0.414066	-0.864636	0.387239	0.782025
ENSG00000065600	TMEM206	1567.56	-0.00324572	0.396125	-0.00819367	0.993462	0.998194
ENSG00000065609	SNAP91	0	NA	NA	NA	NA	NA
ENSG00000065613	SLK	6816.81	0.032952	0.392619	0.0839285	0.933113	0.985143
ENSG00000065615	CYB5R4	5150.43	0.105534	0.268336	0.393292	0.694104	0.916739
ENSG00000065618	COL17A1	181.214	-0.397571	0.883331	-0.450082	0.652651	0.901466
ENSG00000065621	GSTO2	133.703	0.0404645	0.748213	0.0540816	0.95687	0.990126
ENSG00000065665	SEC61A2	439.709	0.445966	0.502733	0.887082	0.375035	0.774689
ENSG00000065675	PRKCQ	1798.22	-0.891478	0.454243	-1.96256	0.0496974	0.434953
ENSG00000065717	TLE2	68.8625	-3.90805	1.01769	-3.8401	0.000122984	0.0221002
ENSG00000065802	ASB1	871.636	-0.0339448	0.198627	-0.170897	0.864304	0.970606
ENSG00000065809	FAM107B	6850.8	-0.473308	0.43485	-1.08844	0.276401	0.706698
ENSG00000065833	ME1	460.336	0.170301	0.735695	0.231483	0.81694	0.954592
ENSG00000065882	TBC1D1	3999.06	0.129774	0.2522	0.51457	0.606853	0.88362
ENSG00000065883	CDK13	3568.18	-0.0852328	0.1659	-0.51376	0.60742	0.883878
ENSG00000065911	MTHFD2	2666.62	-0.180853	0.275446	-0.656584	0.511448	0.84545
ENSG00000065923	SLC9A7	2003.51	-0.08567	0.271287	-0.315791	0.752162	0.937925
ENSG00000065970	FOXJ2	1457.56	-0.414346	0.254995	-1.62492	0.10418	0.532621
ENSG00000065978	YBX1	8520.65	0.430755	0.219529	1.96218	0.0497415	0.434953
ENSG00000065989	PDE4A	1107.05	0.303077	0.605629	0.500434	0.61677	0.886542
ENSG00000066027	PPP2R5A	2812.29	0.229213	0.174678	1.3122	0.189452	0.631359
ENSG00000066032	CTNNA2	23.9269	1.27956	2.17263	0.588947	0.555897	0.865361
ENSG00000066044	ELAVL1	7434.43	-0.293542	0.220116	-1.33358	0.182342	0.627014
ENSG00000066056	TIE1	2237.63	-0.579013	0.467035	-1.23976	0.215063	0.654739
ENSG00000066084	DIP2B	1386.36	-0.347508	0.232863	-1.49233	0.135613	0.57664
ENSG00000066117	SMARCD1	2018.19	-0.0450012	0.255233	-0.176314	0.860047	0.969603
ENSG00000066135	KDM4A	365.295	-0.0856477	0.387929	-0.220782	0.825262	0.957438
ENSG00000066136	NFYC	2914.83	-0.0470541	0.205104	-0.229416	0.818545	0.95524
ENSG00000066185	ZMYND12	94.2514	-0.68915	0.901194	-0.764707	0.444446	0.807276
ENSG00000066230	SLC9A3	64.3273	0.88939	0.792896	1.1217	0.261991	0.694139
ENSG00000066248	NGEF	6.22899	-1.35112	2.97856	-0.453614	0.650107	NA
ENSG00000066279	ASPM	972.23	-0.690693	0.504532	-1.36898	0.171006	0.616609
ENSG00000066294	CD84	4193.67	-0.277461	0.313706	-0.884462	0.376447	0.775769
ENSG00000066322	ELOVL1	3068.46	-0.143205	0.268206	-0.533938	0.593384	0.878266
ENSG00000066336	SPI1	10709.6	0.452669	0.334121	1.3548	0.17548	0.620967
ENSG00000066379	ZNRD1	1030.49	0.162301	0.298624	0.543496	0.586788	0.876111
ENSG00000066382	MPPED2	196.994	-0.325257	0.640748	-0.50762	0.61172	0.885338
ENSG00000066405	CLDN18	0.729242	0.179093	3.02139	0.0592749	0.952733	NA
ENSG00000066422	ZBTB11	1561.73	0.214675	0.250682	0.856366	0.391795	0.783338
ENSG00000066427	ATXN3	1275.07	0.156448	0.204136	0.766389	0.443445	0.806978
ENSG00000066455	GOLGA5	1720.18	-0.335875	0.247368	-1.3578	0.174528	0.620121
ENSG00000066468	FGFR2	97.2974	-3.14929	1.16744	-2.69761	0.00698392	0.211082
ENSG00000066557	LRRC40	1293.11	0.0427203	0.249893	0.170955	0.864259	0.970606
ENSG00000066583	ISOC1	2684.23	-0.562838	0.251576	-2.23725	0.02527	0.351114
ENSG00000066629	EML1	29.9997	1.68337	1.20308	1.39922	0.161747	0.60792
ENSG00000066651	TRMT11	696.836	0.186156	0.499761	0.372491	0.709527	0.922624
ENSG00000066654	THUMPD1	3600.94	-0.145572	0.133294	-1.09211	0.274785	0.706061
ENSG00000066697	MSANTD3	1849.93	0.317186	0.431558	0.734979	0.462352	0.818237
ENSG00000066735	KIF26A	15.9	0.575616	1.14978	0.500633	0.616629	0.886542
ENSG00000066739	ATG2B	536.934	0.0853236	0.581258	0.146791	0.883297	0.975206
ENSG00000066777	ARFGEF1	1965.24	0.417688	0.244961	1.70512	0.0881716	0.507241
ENSG00000066813	ACSM2B	2.34485	0.0522448	3.00738	0.0173722	0.98614	NA
ENSG00000066827	ZFAT	403.141	-0.519227	0.340128	-1.52656	0.12687	0.564036
ENSG00000066855	MTFR1	598.924	-0.00325621	0.379616	-0.00857765	0.993156	0.998076
ENSG00000066923	STAG3	524.486	-0.635371	0.393004	-1.6167	0.105943	0.535388
ENSG00000066926	FECH	4291.83	-0.703127	0.31092	-2.26144	0.0237322	0.345527
ENSG00000066933	MYO9A	981.397	-0.328285	0.354521	-0.925996	0.354448	0.763229
ENSG00000067048	DDX3Y	3735.59	0.261867	0.249953	1.04766	0.294793	0.719508
ENSG00000067057	PFKP	5254.69	-0.0602543	0.241213	-0.249797	0.802744	0.952311
ENSG00000067064	IDI1	6980.35	0.540086	0.314363	1.71803	0.0857907	0.504551
ENSG00000067066	SP100	6839.44	0.595795	0.305772	1.94849	0.051356	0.439485
ENSG00000067082	KLF6	45821.8	0.755241	0.462277	1.63374	0.102313	0.531651
ENSG00000067113	PLPP1	415.172	-0.438107	0.761854	-0.575054	0.565255	0.868843
ENSG00000067141	NEO1	146.032	-0.20682	0.721177	-0.286781	0.77428	0.944632
ENSG00000067167	TRAM1	27134.7	0.379645	0.214707	1.7682	0.077027	0.493974
ENSG00000067177	PHKA1	558.883	-0.658469	0.547618	-1.20242	0.229199	0.666677
ENSG00000067182	TNFRSF1A	9332.34	0.428178	0.318271	1.34533	0.17852	0.623398
ENSG00000067191	CACNB1	195.915	1.01436	0.455472	2.22706	0.0259434	0.353908
ENSG00000067208	EVI5	280	-1.11386	0.638243	-1.7452	0.0809505	0.497379
ENSG00000067221	STOML1	576.163	-0.619082	0.438237	-1.41266	0.157755	0.602383
ENSG00000067225	PKM	52357.5	0.236422	0.296032	0.798639	0.4245	0.800556
ENSG00000067248	DHX29	2098.61	0.397107	0.224132	1.77175	0.0764355	0.49266
ENSG00000067334	DNTTIP2	11730.2	0.247447	0.185734	1.33227	0.182773	0.627014
ENSG00000067365	METTL22	1155.84	0.186	0.23548	0.789874	0.429601	0.802905
ENSG00000067369	TP53BP1	1665.38	-0.164003	0.272725	-0.601351	0.547606	0.861481
ENSG00000067445	TRO	1311.3	-0.77267	0.581231	-1.32937	0.183726	0.627495
ENSG00000067533	RRP15	525.869	-0.119569	0.405808	-0.294645	0.768265	0.942543
ENSG00000067560	RHOA	53607.3	0.334089	0.244753	1.365	0.172252	0.618371
ENSG00000067596	DHX8	2854.86	-0.0357815	0.299994	-0.119274	0.905058	0.979268
ENSG00000067601	PMS2P4	157.962	-0.00426475	0.181975	-0.0234359	0.981303	0.996486
ENSG00000067606	PRKCZ	340.861	-0.232754	0.446784	-0.520954	0.602399	0.882257
ENSG00000067646	ZFY	726.132	0.174387	0.301154	0.579062	0.562547	0.867924
ENSG00000067704	IARS2	4498.78	-0.846896	0.304562	-2.7807	0.00542424	0.188901
ENSG00000067715	SYT1	237.144	-1.09144	0.673741	-1.61997	0.105238	0.534609
ENSG00000067798	NAV3	12.5673	-0.906862	1.96455	-0.461613	0.644359	0.898007
ENSG00000067829	IDH3G	4491.02	0.282919	0.193541	1.4618	0.143795	0.587924
ENSG00000067836	ROGDI	2699.89	-0.554932	0.411808	-1.34755	0.177804	0.622775
ENSG00000067840	PDZD4	14.7445	-1.67649	1.59363	-1.052	0.292801	0.718269
ENSG00000067842	ATP2B3	2.31624	0.779709	3.01906	0.258262	0.796205	NA
ENSG00000067900	ROCK1	5864.37	0.302901	0.239961	1.26229	0.206844	0.648065
ENSG00000067955	CBFB	9482.15	-0.425519	0.252636	-1.68432	0.0921201	0.515588
ENSG00000067992	PDK3	1692.36	-0.18597	0.184406	-1.00848	0.313225	0.734938
ENSG00000068001	HYAL2	1217.63	-0.221613	0.450995	-0.491387	0.623153	0.890053
ENSG00000068024	HDAC4	513.067	-0.153907	0.381598	-0.403322	0.686711	0.913783
ENSG00000068028	RASSF1	13953.5	0.146363	0.319969	0.45743	0.647362	0.899451
ENSG00000068078	FGFR3	147.115	-0.124451	0.807573	-0.154105	0.877527	0.973777
ENSG00000068079	IFI35	1944.8	-0.0490347	0.417455	-0.117461	0.906495	0.979477
ENSG00000068097	HEATR6	860.486	0.0929736	0.33708	0.27582	0.782686	0.946358
ENSG00000068120	COASY	5104.29	-0.0638783	0.14968	-0.426766	0.66955	0.907672
ENSG00000068137	PLEKHH3	152.528	-0.878219	0.873851	-1.005	0.314898	0.736315
ENSG00000068305	MEF2A	2393.12	0.372398	0.257347	1.44706	0.147879	0.593019
ENSG00000068308	OTUD5	5111.01	-0.0227308	0.332398	-0.0683845	0.94548	0.987704
ENSG00000068323	TFE3	3512.77	0.703368	0.32472	2.16607	0.0303055	0.372533
ENSG00000068354	TBC1D25	1548.48	0.352983	0.227648	1.55056	0.121007	0.555001
ENSG00000068366	ACSL4	2342.91	0.0687021	0.291945	0.235325	0.813956	0.9541
ENSG00000068383	INPP5A	1496.7	-0.00238982	0.447023	-0.00534607	0.995734	0.998554
ENSG00000068394	GPKOW	1647.5	-0.163109	0.21903	-0.744689	0.45646	0.814685
ENSG00000068400	GRIPAP1	2702.11	0.524399	0.346551	1.5132	0.13023	0.569016
ENSG00000068438	FTSJ1	2994.24	-0.0893886	0.1522	-0.587309	0.556996	0.86569
ENSG00000068489	PRR11	917.107	-0.701472	0.297606	-2.35705	0.0184206	0.313695
ENSG00000068615	REEP1	89.0125	0.387851	1.40394	0.276259	0.782349	0.946358
ENSG00000068650	ATP11A	753.283	0.113996	0.29852	0.38187	0.702558	0.920439
ENSG00000068654	POLR1A	615.076	-0.943542	0.432269	-2.18277	0.0290531	0.367279
ENSG00000068697	LAPTM4A	30244.2	0.418802	0.284629	1.4714	0.141184	0.584171
ENSG00000068724	TTC7A	5366.43	-0.0623621	0.304156	-0.205033	0.837546	0.962644
ENSG00000068745	IP6K2	6786.15	0.213054	0.239021	0.891364	0.372734	0.772964
ENSG00000068781	STON1-GTF2A1L	0	NA	NA	NA	NA	NA
ENSG00000068784	SRBD1	1254.04	-0.461523	0.382759	-1.20578	0.227902	0.665575
ENSG00000068796	KIF2A	4070.61	-0.234912	0.249519	-0.94146	0.346469	0.757026
ENSG00000068831	RASGRP2	9814.94	-0.062206	0.27498	-0.22622	0.82103	0.955948
ENSG00000068878	PSME4	1340.78	0.494855	0.365711	1.35313	0.176014	0.620972
ENSG00000068885	IFT80	291.887	0.187731	0.323089	0.581051	0.561206	0.867403
ENSG00000068903	SIRT2	3411.77	-0.0792978	0.233255	-0.339962	0.733885	0.931883
ENSG00000068912	ERLEC1	3080.31	0.383917	0.238399	1.6104	0.107312	0.537017
ENSG00000068971	PPP2R5B	497.744	0.0175184	0.302587	0.0578953	0.953832	0.98916
ENSG00000068976	PYGM	34.9741	-0.464381	0.839665	-0.553055	0.580226	0.873025
ENSG00000068985	PAGE1	0.319038	0.837043	3.04225	0.27514	0.783209	NA
ENSG00000069011	PITX1	2.67167	-2.03143	2.9739	-0.683085	0.494553	NA
ENSG00000069018	TRPC7	0	NA	NA	NA	NA	NA
ENSG00000069020	MAST4	1480.54	-0.192872	0.3426	-0.562966	0.573458	0.871811
ENSG00000069122	ADGRF5	307.453	-3.44817	1.1455	-3.01017	0.002611	0.131953
ENSG00000069188	SDK2	703.077	0.106352	0.508174	0.209283	0.834228	0.961182
ENSG00000069206	ADAM7	0	NA	NA	NA	NA	NA
ENSG00000069248	NUP133	2392.36	-0.326627	0.266075	-1.22758	0.219606	0.659447
ENSG00000069275	NUCKS1	4442.02	-0.328582	0.249518	-1.31687	0.187884	0.631244
ENSG00000069329	VPS35	11314.4	-0.133146	0.220339	-0.604279	0.545658	0.861178
ENSG00000069345	DNAJA2	4804.96	0.383255	0.167952	2.28192	0.0224939	0.339219
ENSG00000069399	BCL3	17054.2	0.685439	0.616995	1.11093	0.266598	0.698702
ENSG00000069424	KCNAB2	10167.1	0.183223	0.197945	0.925629	0.354639	0.763293
ENSG00000069431	ABCC9	18.5948	0.353018	1.4341	0.24616	0.805558	0.952668
ENSG00000069482	GAL	69.5577	-1.01283	0.739187	-1.37019	0.170628	0.616444
ENSG00000069493	CLEC2D	422.227	-0.402374	0.29215	-1.37729	0.168424	0.613301
ENSG00000069509	FUNDC1	1112.32	0.032948	0.320396	0.102835	0.918094	0.981493
ENSG00000069535	MAOB	39.4815	-2.91435	1.46212	-1.99324	0.0462349	0.424295
ENSG00000069667	RORA	139.533	-1.72453	1.05006	-1.64231	0.100526	0.529069
ENSG00000069696	DRD4	9.11365	2.25335	0.903581	2.4938	0.0126385	0.264185
ENSG00000069702	TGFBR3	372.648	-0.76749	0.911263	-0.842226	0.399661	0.788335
ENSG00000069764	PLA2G10	0.733785	0.507834	3.0071	0.168878	0.865892	NA
ENSG00000069812	HES2	3.43727	0.946589	2.99642	0.315907	0.752073	NA
ENSG00000069849	ATP1B3	10161.1	-0.000119806	0.186084	-0.000643828	0.999486	0.999949
ENSG00000069869	NEDD4	1499.36	-0.555022	0.279669	-1.98457	0.0471926	0.427844
ENSG00000069943	PIGB	697.96	-0.121072	0.218786	-0.553382	0.580002	0.873025
ENSG00000069956	MAPK6	3595.4	0.403081	0.417676	0.965056	0.334517	0.750982
ENSG00000069966	GNB5	1205.5	-0.374981	0.316572	-1.1845	0.236214	0.672604
ENSG00000069974	RAB27A	3262.8	-0.242883	0.446146	-0.544403	0.586164	0.875666
ENSG00000069998	HDHD5	5151.2	-0.376853	0.286689	-1.3145	0.188678	0.631244
ENSG00000070010	UFD1	2224.9	0.211055	0.275493	0.766099	0.443618	0.806986
ENSG00000070018	LRP6	466.451	-0.0380754	0.418734	-0.0909298	0.927548	0.984111
ENSG00000070019	GUCY2C	2.3682	-2.7542	3.0069	-0.91596	0.359688	NA
ENSG00000070031	SCT	5.48832	0.0786377	2.99336	0.0262707	0.979041	NA
ENSG00000070047	PHRF1	2597.08	-0.218168	0.386671	-0.564222	0.572603	0.871375
ENSG00000070061	ELP1	1561.16	-0.883297	0.358851	-2.46146	0.0138373	0.275842
ENSG00000070081	NUCB2	26505.5	-0.105029	0.34119	-0.307833	0.75821	0.939983
ENSG00000070087	PFN2	70.3408	1.90078	0.803048	2.36695	0.0179353	0.310065
ENSG00000070159	PTPN3	0.272854	-0.692842	3.04724	-0.227367	0.820138	NA
ENSG00000070182	SPTB	327.216	0.0132776	0.698688	0.0190036	0.984838	0.996595
ENSG00000070190	DAPP1	1346.38	-0.0486209	0.384413	-0.126481	0.899351	0.978243
ENSG00000070193	FGF10	0	NA	NA	NA	NA	NA
ENSG00000070214	SLC44A1	5131.21	-0.525582	0.351621	-1.49474	0.134982	0.575742
ENSG00000070269	TMEM260	890.554	-0.613126	0.36954	-1.65916	0.097084	0.523117
ENSG00000070366	SMG6	441.666	0.014432	0.269401	0.0535707	0.957277	0.990175
ENSG00000070367	EXOC5	3221.26	-0.221074	0.239915	-0.921466	0.356807	0.764672
ENSG00000070371	CLTCL1	163.448	-1.5778	0.697815	-2.26105	0.0237561	0.345527
ENSG00000070388	FGF22	0.167269	-0.0252373	3.04301	-0.00829352	0.993383	NA
ENSG00000070404	FSTL3	381.624	0.387016	0.334412	1.1573	0.247149	0.681632
ENSG00000070413	DGCR2	4309.59	-0.553648	0.317305	-1.74485	0.0810117	0.497379
ENSG00000070423	RNF126	7054.69	0.0221122	0.174075	0.127027	0.898919	0.978243
ENSG00000070444	MNT	310.265	0.248403	0.415155	0.598339	0.549614	0.86186
ENSG00000070476	ZXDC	3624.96	-0.11736	0.329876	-0.355769	0.722013	0.927967
ENSG00000070495	JMJD6	3996.55	0.575614	0.363526	1.58342	0.113326	0.547212
ENSG00000070501	POLB	1638.43	0.745666	0.296629	2.5138	0.0119438	0.25955
ENSG00000070526	ST6GALNAC1	192.816	-0.869001	0.726848	-1.19558	0.231862	0.668604
ENSG00000070540	WIPI1	797.15	0.27096	0.403201	0.672023	0.501569	0.840288
ENSG00000070601	FRMPD1	0.639609	0.456832	3.01665	0.151437	0.879631	NA
ENSG00000070610	GBA2	2155.95	0.0225915	0.381569	0.0592069	0.952787	0.988875
ENSG00000070614	NDST1	1503.75	-0.0534708	0.292809	-0.182614	0.855101	0.968237
ENSG00000070669	ASNS	17.3088	-0.120296	1.16988	-0.102828	0.9181	0.981493
ENSG00000070718	AP3M2	1232.64	-0.394889	0.422026	-0.9357	0.349428	0.758717
ENSG00000070729	CNGB1	4.83937	1.23532	2.21024	0.558908	0.576224	NA
ENSG00000070731	ST6GALNAC2	46.6412	0.285917	0.60461	0.472894	0.636289	0.895305
ENSG00000070748	CHAT	0	NA	NA	NA	NA	NA
ENSG00000070756	PABPC1	54504.3	0.536986	0.218184	2.46117	0.0138486	0.275842
ENSG00000070759	TESK2	528.187	0.457794	0.295718	1.54808	0.121604	0.556135
ENSG00000070761	CFAP20	3731.45	-0.0435764	0.284811	-0.153001	0.878397	0.97385
ENSG00000070770	CSNK2A2	4070.27	0.286124	0.236032	1.21223	0.225426	0.663875
ENSG00000070778	PTPN21	15.9256	0.0966765	1.83647	0.0526426	0.958017	0.990213
ENSG00000070785	EIF2B3	1519.47	-0.601534	0.431825	-1.393	0.163619	0.609902
ENSG00000070808	CAMK2A	11.8444	-1.10542	1.80066	-0.613898	0.539283	0.858067
ENSG00000070814	TCOF1	4074.75	-0.433134	0.218752	-1.98002	0.0477014	0.429587
ENSG00000070831	CDC42	11968.1	0.885574	0.327011	2.70809	0.00676722	0.207856
ENSG00000070882	OSBPL3	887.267	-0.609987	0.277811	-2.1957	0.0281138	0.363282
ENSG00000070886	EPHA8	0	NA	NA	NA	NA	NA
ENSG00000070915	SLC12A3	5.31189	-0.671947	3.02403	-0.222202	0.824156	NA
ENSG00000070950	RAD18	1661.11	-0.353434	0.279937	-1.26255	0.206751	0.647952
ENSG00000070961	ATP2B1	6148.86	0.555931	0.407419	1.36452	0.172405	0.618371
ENSG00000070985	TRPM5	1.52432	1.79528	3.00454	0.597522	0.550159	NA
ENSG00000071051	NCK2	2980.14	-0.292625	0.381913	-0.766207	0.443553	0.806978
ENSG00000071054	MAP4K4	4322.28	-0.18166	0.379441	-0.478756	0.632112	0.893709
ENSG00000071073	MGAT4A	2213.75	0.751736	0.280101	2.6838	0.00727901	0.215183
ENSG00000071082	RPL31	30635.6	0.458367	0.228683	2.00438	0.0450299	0.420517
ENSG00000071127	WDR1	24293.2	-0.00510634	0.29246	-0.0174599	0.98607	0.996626
ENSG00000071189	SNX13	1284.81	0.125243	0.197266	0.634893	0.525498	0.850958
ENSG00000071203	MS4A12	0	NA	NA	NA	NA	NA
ENSG00000071205	ARHGAP10	573.518	-0.0430955	0.408895	-0.105395	0.916062	0.980933
ENSG00000071242	RPS6KA2	375.185	0.382988	0.400572	0.956102	0.339021	0.752841
ENSG00000071243	ING3	2449.27	0.03984	0.324951	0.122603	0.902422	0.978898
ENSG00000071246	VASH1	345.547	0.932638	0.575609	1.62026	0.105176	0.534609
ENSG00000071282	LMCD1	147.407	-1.71968	0.787565	-2.18354	0.0289957	0.367062
ENSG00000071462	BUD23	5153.69	0.26111	0.205205	1.27244	0.203217	0.645065
ENSG00000071537	SEL1L	2930.06	-0.153614	0.185282	-0.829083	0.407057	0.792391
ENSG00000071539	TRIP13	1387.06	-1.13698	0.667124	-1.7043	0.0883253	0.507463
ENSG00000071553	ATP6AP1	16696.3	0.330197	0.172794	1.91093	0.056013	0.456445
ENSG00000071564	TCF3	7988	-0.812009	0.372533	-2.1797	0.0292798	0.369198
ENSG00000071575	TRIB2	1410.59	-0.886685	0.538927	-1.64528	0.0999126	0.527527
ENSG00000071626	DAZAP1	1729.24	0.153438	0.237013	0.647381	0.517385	0.847847
ENSG00000071655	MBD3	2135.6	-0.381824	0.32728	-1.16666	0.243347	0.678406
ENSG00000071677	PRLH	0	NA	NA	NA	NA	NA
ENSG00000071794	HLTF	2658.49	-0.942325	0.390916	-2.41056	0.0159282	0.293585
ENSG00000071859	FAM50A	1589.11	-0.108546	0.331995	-0.326951	0.743705	0.935919
ENSG00000071889	FAM3A	2534.99	0.217057	0.192428	1.12799	0.259323	0.693155
ENSG00000071894	CPSF1	9833.47	-0.375938	0.240376	-1.56396	0.117827	0.55077
ENSG00000071909	MYO3B	13.5441	-1.10484	2.732	-0.404408	0.685913	0.91351
ENSG00000071967	CYBRD1	2176.67	-0.116552	0.29668	-0.392854	0.694427	0.916806
ENSG00000071991	CDH19	0	NA	NA	NA	NA	NA
ENSG00000071994	PDCD2	4305.58	-0.0981183	0.153989	-0.637176	0.52401	0.850494
ENSG00000072041	SLC6A15	0.106346	0.811163	3.0522	0.265763	0.790422	NA
ENSG00000072042	RDH11	2446.1	0.0344896	0.217482	0.158586	0.873995	0.973103
ENSG00000072062	PRKACA	523.706	0.195535	0.388907	0.502781	0.615118	0.88634
ENSG00000072071	ADGRL1	310.628	0.141586	0.415727	0.340575	0.733423	0.931883
ENSG00000072080	SPP2	0	NA	NA	NA	NA	NA
ENSG00000072110	ACTN1	17237	-0.352626	0.268486	-1.31339	0.189053	0.631244
ENSG00000072121	ZFYVE26	392.888	-0.248802	0.375816	-0.662033	0.50795	0.844081
ENSG00000072133	RPS6KA6	50.65	-3.31557	1.3023	-2.54593	0.0108987	0.252896
ENSG00000072134	EPN2	91.6972	-1.83319	0.5589	-3.28	0.00103808	0.0813798
ENSG00000072135	PTPN18	3857.62	-0.443689	0.351803	-1.26119	0.207241	0.648648
ENSG00000072163	LIMS2	166.127	0.623546	0.460689	1.35351	0.175893	0.620972
ENSG00000072182	ASIC4	12.3588	1.74608	2.56061	0.6819	0.495302	0.836578
ENSG00000072195	SPEG	41.3867	1.93655	1.12642	1.71922	0.0855751	0.504551
ENSG00000072201	LNX1	223.184	-0.207383	0.55988	-0.370407	0.71108	0.923237
ENSG00000072210	ALDH3A2	1788.53	-0.579631	0.700589	-0.827349	0.408039	0.792551
ENSG00000072274	TFRC	17945.2	-0.284197	0.266394	-1.06683	0.286048	0.714459
ENSG00000072310	SREBF1	5416.38	0.350843	0.290529	1.2076	0.227202	0.665374
ENSG00000072315	TRPC5	0.198182	-0.0904619	3.04438	-0.0297144	0.976295	NA
ENSG00000072364	AFF4	2665.32	0.681859	0.385754	1.7676	0.077128	0.493974
ENSG00000072401	UBE2D1	3387.3	0.323701	0.375606	0.86181	0.388792	0.782025
ENSG00000072415	MPP5	615.884	0.260351	0.25282	1.02979	0.30311	0.726221
ENSG00000072422	RHOBTB1	656.708	-0.175234	0.196273	-0.892808	0.37196	0.77296
ENSG00000072501	SMC1A	5215.01	-0.82688	0.312461	-2.64635	0.00813661	0.227344
ENSG00000072506	HSD17B10	3535.68	-0.0754359	0.20514	-0.367729	0.713075	0.923911
ENSG00000072518	MARK2	3858.37	-0.0599816	0.248097	-0.241767	0.808961	0.953419
ENSG00000072571	HMMR	1224.24	-0.899712	0.51368	-1.7515	0.079859	0.497036
ENSG00000072609	CHFR	2555.93	0.292517	0.253115	1.15567	0.247817	0.681632
ENSG00000072657	TRHDE	7.98061	-2.88335	2.18862	-1.31742	0.187696	0.631007
ENSG00000072682	P4HA2	135.193	0.118197	0.393541	0.300343	0.763915	0.941507
ENSG00000072694	FCGR2B	246.671	-0.687349	0.755008	-0.910387	0.362618	0.767588
ENSG00000072736	NFATC3	2978.93	-0.237221	0.245842	-0.964932	0.334579	0.750982
ENSG00000072756	TRNT1	1239.41	0.17014	0.251263	0.677141	0.498316	0.838281
ENSG00000072778	ACADVL	20442.2	0.197937	0.330336	0.599201	0.549039	0.861668
ENSG00000072786	STK10	8474.49	0.137669	0.326174	0.422073	0.672972	0.909327
ENSG00000072803	FBXW11	2576.17	0.0823448	0.294049	0.280038	0.779449	0.945265
ENSG00000072818	ACAP1	9382	-0.36922	0.350042	-1.05479	0.291522	0.717447
ENSG00000072832	CRMP1	81.6733	-2.09776	0.996275	-2.1056	0.0352388	0.390008
ENSG00000072840	EVC	203.414	-3.84156	1.2092	-3.17694	0.00148835	0.0991459
ENSG00000072849	DERL2	3400.68	0.456937	0.312251	1.46337	0.143367	0.587612
ENSG00000072858	SIDT1	870.587	-0.691834	0.445117	-1.55427	0.120119	0.553854
ENSG00000072864	NDE1	2075.99	0.0295048	0.150533	0.196002	0.844608	0.965451
ENSG00000072952	MRVI1	124.878	-2.39237	0.938742	-2.54848	0.0108192	0.251997
ENSG00000072954	TMEM38A	68.2966	-2.60087	0.802491	-3.241	0.00119111	0.0896665
ENSG00000072958	AP1M1	7876.51	-0.414135	0.235839	-1.75601	0.0790873	0.495717
ENSG00000073008	PVR	852.567	0.237368	0.371942	0.638185	0.523353	0.850459
ENSG00000073050	XRCC1	1421.78	-0.281273	0.191688	-1.46735	0.142281	0.586131
ENSG00000073060	SCARB1	3843.05	-0.398853	0.276523	-1.44239	0.149193	0.594122
ENSG00000073067	CYP2W1	3.70313	0.209053	3.03724	0.06883	0.945125	NA
ENSG00000073111	MCM2	20772.4	-0.866757	0.41943	-2.06651	0.0387802	0.401394
ENSG00000073146	MOV10L1	5.16305	-0.488269	1.66112	-0.293941	0.768803	NA
ENSG00000073150	PANX2	119.427	0.420908	0.615734	0.683588	0.494236	0.835816
ENSG00000073169	SELENOO	1660.27	-0.235372	0.381621	-0.616768	0.537388	0.857466
ENSG00000073282	TP63	5.81733	-0.192319	2.99527	-0.0642075	0.948805	NA
ENSG00000073331	ALPK1	804.732	-0.286108	0.359921	-0.794918	0.426661	0.801502
ENSG00000073350	LLGL2	629.308	-0.396814	0.187712	-2.11394	0.03452	0.388254
ENSG00000073417	PDE8A	404.673	0.197548	0.661238	0.298754	0.765128	0.941719
ENSG00000073464	CLCN4	134.243	-0.941014	0.758181	-1.24115	0.214551	0.654428
ENSG00000073536	NLE1	781.129	-0.519435	0.354236	-1.46635	0.142553	0.586493
ENSG00000073578	SDHA	12413.1	-0.45659	0.209846	-2.17583	0.0295678	0.370126
ENSG00000073584	SMARCE1	601.271	0.117715	0.291301	0.404102	0.686138	0.91351
ENSG00000073598	FNDC8	3.40132	0.0112936	1.73759	0.00649958	0.994814	NA
ENSG00000073605	GSDMB	19.3492	-1.05326	1.29606	-0.812665	0.41641	0.796848
ENSG00000073614	KDM5A	4792.84	0.27607	0.286553	0.963416	0.335339	0.751532
ENSG00000073670	ADAM11	24.4491	-2.20569	0.973319	-2.26615	0.0234422	0.343508
ENSG00000073711	PPP2R3A	230.003	-0.0447864	0.572656	-0.0782083	0.937662	0.986131
ENSG00000073712	FERMT2	165.636	1.40945	1.22355	1.15194	0.249348	0.683214
ENSG00000073734	ABCB11	6.81125	-0.511585	2.97686	-0.171854	0.863553	0.970514
ENSG00000073737	DHRS9	366.553	-1.42441	0.982223	-1.45019	0.147005	0.591805
ENSG00000073754	CD5L	6719.56	-1.3521	0.656423	-2.05979	0.0394182	0.404256
ENSG00000073756	PTGS2	2330.96	0.398838	0.570055	0.699647	0.484148	0.831775
ENSG00000073792	IGF2BP2	2388.96	0.155688	0.286095	0.544185	0.586314	0.875743
ENSG00000073803	MAP3K13	1248.03	0.136914	0.343997	0.398007	0.690625	0.915865
ENSG00000073849	ST6GAL1	1861.12	-0.895911	0.505325	-1.77294	0.0762387	0.49266
ENSG00000073861	TBX21	45.7359	-2.28813	1.29419	-1.76801	0.0770592	0.493974
ENSG00000073905	VDAC1P1	118.477	-0.329772	0.255131	-1.29256	0.196165	0.638539
ENSG00000073910	FRY	655.199	0.00823674	0.395785	0.0208111	0.983396	0.996486
ENSG00000073921	PICALM	3202.72	0.330643	0.246854	1.33943	0.180431	0.625143
ENSG00000073969	NSF	1740.3	-0.320048	0.350463	-0.913217	0.361128	0.767588
ENSG00000074047	GLI2	7.04557	1.05409	3.01472	0.349646	0.726604	0.930368
ENSG00000074054	CLASP1	1319.7	0.0805193	0.294374	0.273527	0.784448	0.946404
ENSG00000074071	MRPS34	3895.37	-0.577031	0.303159	-1.90339	0.0569892	0.457662
ENSG00000074181	NOTCH3	138.059	-0.270713	0.708199	-0.382256	0.702272	0.92026
ENSG00000074201	CLNS1A	4861.81	-0.798614	0.379001	-2.10716	0.035104	0.389837
ENSG00000074211	PPP2R2C	1.99255	-1.2134	3.00068	-0.404375	0.685937	NA
ENSG00000074219	TEAD2	17.3334	-0.424815	0.909872	-0.466895	0.640575	0.896983
ENSG00000074266	EED	910.285	0.0579993	0.408058	0.142135	0.886974	0.975891
ENSG00000074276	CDHR2	13.1782	-1.34718	0.974144	-1.38294	0.166684	0.611776
ENSG00000074317	SNCB	0	NA	NA	NA	NA	NA
ENSG00000074319	TSG101	4626.43	0.37825	0.287494	1.31568	0.188281	0.631244
ENSG00000074356	NCBP3	1950.36	-0.0722624	0.206314	-0.350255	0.726147	0.930029
ENSG00000074370	ATP2A3	13966.2	-0.662581	0.237664	-2.78789	0.00530525	0.186853
ENSG00000074410	CA12	2.51454	-1.094	3.02589	-0.361545	0.717692	NA
ENSG00000074416	MGLL	6136.79	-0.048459	0.502303	-0.0964738	0.923144	0.982948
ENSG00000074527	NTN4	60.2411	2.02369	1.32016	1.5329	0.125299	0.562491
ENSG00000074582	BCS1L	1535.06	-0.426832	0.291455	-1.46448	0.143062	0.587022
ENSG00000074590	NUAK1	38.0162	-2.35446	1.42726	-1.64964	0.0990163	0.526985
ENSG00000074603	DPP8	2622.51	0.00215665	0.232831	0.00926275	0.99261	0.997977
ENSG00000074621	SLC24A1	164.845	-0.653263	0.498768	-1.30975	0.190279	0.63216
ENSG00000074657	ZNF532	264.472	0.198851	0.589603	0.337263	0.735919	0.932221
ENSG00000074660	SCARF1	4221.86	-0.0891171	0.324008	-0.275046	0.783281	0.946358
ENSG00000074695	LMAN1	7359.02	-0.290719	0.228865	-1.27026	0.203991	0.645793
ENSG00000074696	HACD3	4756.27	-0.618094	0.306777	-2.0148	0.0439261	0.417723
ENSG00000074706	IPCEF1	130.402	-1.06289	0.837027	-1.26983	0.204144	0.645793
ENSG00000074755	ZZEF1	918.101	0.204588	0.364082	0.561928	0.574165	0.871981
ENSG00000074771	NOX3	1.95612	-0.730867	3.01915	-0.242077	0.808721	NA
ENSG00000074800	ENO1	166391	0.107025	0.215203	0.497319	0.618964	0.887381
ENSG00000074803	SLC12A1	1.92095	1.17947	2.98239	0.395478	0.69249	NA
ENSG00000074842	MYDGF	10867.4	0.0225303	0.203673	0.11062	0.911917	0.979965
ENSG00000074855	ANO8	26.7492	-0.46899	0.847622	-0.553301	0.580057	0.873025
ENSG00000074935	TUBE1	626.151	0.337964	0.327107	1.03319	0.301514	0.725588
ENSG00000074964	ARHGEF10L	226.281	-1.95992	1.21848	-1.6085	0.107726	0.537418
ENSG00000074966	TXK	58.3822	-1.54461	0.703865	-2.19446	0.0282021	0.363499
ENSG00000075035	WSCD2	9.83655	-3.68247	2.97644	-1.23721	0.216011	0.655605
ENSG00000075043	KCNQ2	312.711	-0.882556	0.920724	-0.958546	0.337788	0.752251
ENSG00000075073	TACR2	15.7347	0.77525	1.18599	0.653671	0.513324	0.845845
ENSG00000075089	ACTR6	1266.05	-0.255326	0.251871	-1.01372	0.310716	0.732643
ENSG00000075131	TIPIN	768.921	-0.373252	0.273602	-1.36422	0.172499	0.618371
ENSG00000075142	SRI	7210.21	-0.0987666	0.228013	-0.433162	0.664897	0.905767
ENSG00000075151	EIF4G3	2973.77	-0.34978	0.199419	-1.754	0.0794307	0.496579
ENSG00000075188	NUP37	1275.35	-0.146992	0.234798	-0.626035	0.531292	0.853986
ENSG00000075213	SEMA3A	174.404	-0.516905	0.820575	-0.629931	0.52874	0.852687
ENSG00000075218	GTSE1	817.214	-0.698139	0.405815	-1.72034	0.0853713	0.504314
ENSG00000075223	SEMA3C	487.837	-2.07114	0.691625	-2.9946	0.00274808	0.136213
ENSG00000075234	TTC38	2150.32	0.00661362	0.147618	0.0448024	0.964265	0.991579
ENSG00000075239	ACAT1	3503.22	-0.589987	0.31243	-1.88838	0.0589748	0.462274
ENSG00000075240	GRAMD4	4327.36	-0.565279	0.318911	-1.77253	0.0763073	0.49266
ENSG00000075275	CELSR1	192.38	-0.856585	0.982674	-0.871688	0.383379	0.780623
ENSG00000075290	WNT8B	1.88001	-1.11584	3.01614	-0.369955	0.711416	NA
ENSG00000075292	ZNF638	3446.86	0.0379585	0.208703	0.181878	0.855678	0.968302
ENSG00000075303	SLC25A40	1278.54	-0.492466	0.218582	-2.253	0.0242589	0.347508
ENSG00000075336	TIMM21	1220.85	-0.238158	0.328221	-0.725601	0.468083	0.821774
ENSG00000075340	ADD2	995.871	-0.566032	0.651449	-0.868881	0.384912	0.780964
ENSG00000075388	FGF4	0	NA	NA	NA	NA	NA
ENSG00000075391	RASAL2	358.604	0.340156	0.437997	0.776616	0.437385	0.804266
ENSG00000075399	VPS9D1	343.495	0.535354	0.302017	1.77259	0.0762963	0.49266
ENSG00000075407	ZNF37A	777.828	-0.428087	0.400274	-1.06949	0.284851	0.713575
ENSG00000075413	MARK3	4760.71	0.153128	0.179771	0.851798	0.394326	0.78591
ENSG00000075415	SLC25A3	14225.7	0.16134	0.193126	0.83541	0.403487	0.791048
ENSG00000075420	FNDC3B	3462.17	0.718526	0.36703	1.95768	0.0502677	0.436423
ENSG00000075426	FOSL2	23177.7	0.507538	0.560059	0.906223	0.364818	0.768575
ENSG00000075429	CACNG5	0	NA	NA	NA	NA	NA
ENSG00000075461	CACNG4	4.93872	1.40743	2.1621	0.650953	0.515077	NA
ENSG00000075539	FRYL	1087.84	0.249995	0.335029	0.746189	0.455553	0.814175
ENSG00000075568	TMEM131	2059.66	-0.0556492	0.267737	-0.207851	0.835346	0.961624
ENSG00000075618	FSCN1	6008.36	-0.0793373	0.313	-0.253474	0.799902	0.951505
ENSG00000075624	ACTB	657152	-0.220821	0.29336	-0.752732	0.451611	0.811004
ENSG00000075643	MOCOS	22.5961	-1.13918	0.926487	-1.22957	0.218857	0.658807
ENSG00000075651	PLD1	1792.92	0.241217	0.454655	0.530549	0.595732	0.878738
ENSG00000075673	ATP12A	16.7318	0.720178	1.2883	0.559015	0.576152	0.872332
ENSG00000075702	WDR62	934.779	-0.608099	0.324535	-1.87375	0.0609643	0.467282
ENSG00000075711	DLG1	2244.97	-0.0749734	0.193031	-0.388401	0.697719	0.918287
ENSG00000075785	RAB7A	19784.6	0.0124218	0.229302	0.0541724	0.956798	0.990126
ENSG00000075790	BCAP29	3181.37	-0.0249388	0.219654	-0.113537	0.909605	0.979961
ENSG00000075826	SEC31B	653.039	0.511318	0.724506	0.705748	0.480345	0.829239
ENSG00000075856	SART3	2125.1	-0.0312052	0.284866	-0.109543	0.912772	0.980237
ENSG00000075884	ARHGAP15	8088.8	-0.0687797	0.253009	-0.271847	0.785739	0.946555
ENSG00000075886	TUBA3D	11.8134	-0.996771	0.945185	-1.05458	0.291618	0.717447
ENSG00000075891	PAX2	0.0658835	0.71056	3.05963	0.232237	0.816354	NA
ENSG00000075914	EXOSC7	1393.62	-0.06873	0.15444	-0.445026	0.656301	0.902919
ENSG00000075945	KIFAP3	1323.93	-0.19272	0.321395	-0.599637	0.548748	0.861654
ENSG00000075975	MKRN2	3913.96	-0.170232	0.14817	-1.14889	0.250601	0.684397
ENSG00000076003	MCM6	6974.13	-0.772523	0.38045	-2.03055	0.0423007	0.415506
ENSG00000076043	REXO2	1792.4	-0.292182	0.24595	-1.18797	0.234843	0.671232
ENSG00000076053	RBM7	3270.61	0.110348	0.284005	0.388542	0.697615	0.918287
ENSG00000076067	RBMS2	959.215	1.11051	0.408192	2.72057	0.006517	0.204849
ENSG00000076108	BAZ2A	3612.16	0.504552	0.349395	1.44407	0.148718	0.593819
ENSG00000076201	PTPN23	541.786	0.19005	0.316922	0.599673	0.548724	0.861654
ENSG00000076242	MLH1	2238.4	-0.485549	0.224369	-2.16406	0.0304596	0.372701
ENSG00000076248	UNG	6882.57	-1.18987	0.496859	-2.39479	0.0166299	0.299084
ENSG00000076258	FMO4	131.572	-0.161633	0.564228	-0.286467	0.774521	0.944646
ENSG00000076321	KLHL20	857.715	0.304055	0.233049	1.30468	0.192001	0.634099
ENSG00000076344	RGS11	6.9003	-4.51228	2.90714	-1.55214	0.12063	0.554544
ENSG00000076351	SLC46A1	80.2985	-0.373048	0.741652	-0.502996	0.614967	0.88634
ENSG00000076356	PLXNA2	116.711	0.920966	0.852208	1.08068	0.279838	0.709371
ENSG00000076382	SPAG5	1671.28	-0.349958	0.339405	-1.03109	0.302498	0.725588
ENSG00000076513	ANKRD13A	5045.24	-0.309309	0.181614	-1.70311	0.0885476	0.507956
ENSG00000076554	TPD52	2715.73	-0.27462	0.243136	-1.12949	0.258691	0.692233
ENSG00000076555	ACACB	275.353	-1.01068	0.570373	-1.77197	0.0764002	0.49266
ENSG00000076604	TRAF4	506.176	0.968057	0.399987	2.42022	0.0155111	0.28983
ENSG00000076641	PAG1	2780.14	-0.265419	0.390415	-0.679839	0.496607	0.836969
ENSG00000076650	GPATCH1	502.557	0.0223726	0.563897	0.0396749	0.968352	0.992935
ENSG00000076662	ICAM3	1241.46	0.156212	0.174123	0.897137	0.369646	0.771851
ENSG00000076685	NT5C2	4360.35	0.256922	0.157078	1.63564	0.101916	0.53081
ENSG00000076706	MCAM	202.077	0.861572	0.892888	0.964928	0.334581	0.750982
ENSG00000076716	GPC4	74.3329	1.78216	1.24921	1.42663	0.153688	0.598503
ENSG00000076770	MBNL3	1039.84	-0.394573	0.374154	-1.05457	0.291621	0.717447
ENSG00000076826	CAMSAP3	45.3232	0.330601	1.09499	0.301922	0.762711	0.940677
ENSG00000076864	RAP1GAP	50.8742	-1.0429	0.741477	-1.40651	0.159572	0.605182
ENSG00000076924	XAB2	1986.95	0.242586	0.235171	1.03153	0.302294	0.725588
ENSG00000076928	ARHGEF1	14833.3	0.111918	0.209078	0.535291	0.592449	0.878266
ENSG00000076944	STXBP2	3968.02	-0.0819711	0.283034	-0.289616	0.77211	0.94376
ENSG00000076984	MAP2K7	233.092	0.447239	0.290203	1.54112	0.123287	0.559556
ENSG00000077009	NMRK2	0.428351	0.895804	3.02468	0.296165	0.767104	NA
ENSG00000077044	DGKD	2682.89	0.00912346	0.265313	0.0343875	0.972568	0.993748
ENSG00000077063	CTTNBP2	39.7598	-1.65396	1.31094	-1.26166	0.207073	0.648467
ENSG00000077080	ACTL6B	1.67344	1.71207	3.01227	0.568365	0.569787	NA
ENSG00000077092	RARB	21.7814	1.29725	0.934392	1.38834	0.165034	0.611132
ENSG00000077097	TOP2B	12584.3	-0.838771	0.299929	-2.79656	0.00516493	0.185283
ENSG00000077147	TM9SF3	12522.3	0.0207276	0.200927	0.10316	0.917836	0.981391
ENSG00000077150	NFKB2	2321.45	0.976331	0.591712	1.65001	0.0989411	0.526853
ENSG00000077152	UBE2T	1154.36	-0.255287	0.462826	-0.551582	0.581235	0.873201
ENSG00000077157	PPP1R12B	650.344	-0.22845	0.292527	-0.780955	0.434829	0.803457
ENSG00000077232	DNAJC10	4998.5	-0.456141	0.337026	-1.35343	0.175919	0.620972
ENSG00000077235	GTF3C1	2546.91	-0.249239	0.279077	-0.893083	0.371813	0.77296
ENSG00000077238	IL4R	1429.78	0.560957	0.319171	1.75754	0.0788256	0.495314
ENSG00000077254	USP33	3867.84	-0.0962385	0.264722	-0.363545	0.716198	0.925199
ENSG00000077264	PAK3	1.80583	0.115825	3.01998	0.0383528	0.969406	NA
ENSG00000077274	CAPN6	21.0877	-0.793601	2.76336	-0.287187	0.773969	0.944364
ENSG00000077279	DCX	0.209086	-0.0278547	3.04179	-0.00915732	0.992694	NA
ENSG00000077312	SNRPA	5434.17	-0.280823	0.21511	-1.30549	0.191727	0.633579
ENSG00000077327	SPAG6	1239.38	0.934547	0.43036	2.17155	0.0298899	0.371589
ENSG00000077348	EXOSC5	2838.8	-0.757884	0.414409	-1.82883	0.0674245	0.480394
ENSG00000077380	DYNC1I2	2366.06	-0.115299	0.274041	-0.420736	0.673948	0.909841
ENSG00000077420	APBB1IP	3358.32	-0.146631	0.244022	-0.600892	0.547912	0.861616
ENSG00000077454	LRCH4	1937	-0.0722352	0.241629	-0.298951	0.764978	0.941689
ENSG00000077458	FAM76B	2837.15	0.498797	0.360716	1.3828	0.166727	0.611776
ENSG00000077463	SIRT6	113.101	0.496305	0.361848	1.37158	0.170193	0.615317
ENSG00000077498	TYR	0.18998	0.451776	3.03755	0.148731	0.881766	NA
ENSG00000077514	POLD3	1894.09	-0.294428	0.269925	-1.09078	0.275371	0.706415
ENSG00000077522	ACTN2	12.641	2.72086	1.42756	1.90595	0.056657	0.457334
ENSG00000077549	CAPZB	12015.7	0.1475	0.204521	0.7212	0.470786	0.824255
ENSG00000077585	GPR137B	872.424	0.00941341	0.499017	0.0188639	0.98495	0.996595
ENSG00000077616	NAALAD2	151.472	0.658749	0.564456	1.16705	0.24319	0.678406
ENSG00000077684	JADE1	4049.29	-0.193719	0.226358	-0.855808	0.392104	0.783557
ENSG00000077713	SLC25A43	743.019	0.00238619	0.288006	0.00828519	0.993389	0.998192
ENSG00000077721	UBE2A	5009.49	0.158767	0.198274	0.800749	0.423277	0.799916
ENSG00000077782	FGFR1	1909.88	-0.247413	0.542935	-0.455696	0.648609	0.899656
ENSG00000077800	FKBP6	13.1342	0.371495	0.608019	0.610992	0.541205	0.859326
ENSG00000077935	SMC1B	170.429	-0.64196	0.555375	-1.1559	0.247721	0.681632
ENSG00000077942	FBLN1	612.386	0.182224	0.672736	0.270871	0.786491	0.946933
ENSG00000077943	ITGA8	12.2662	0.31952	2.55252	0.125178	0.900382	0.978739
ENSG00000077984	CST7	9320.55	0.841253	0.381464	2.20533	0.0274309	0.359692
ENSG00000078018	MAP2	14.3225	1.66743	1.92656	0.865496	0.386767	0.782025
ENSG00000078043	PIAS2	2352.75	-0.0108285	0.291218	-0.0371835	0.970339	0.993304
ENSG00000078053	AMPH	26.4877	-1.31775	0.655034	-2.01173	0.0442481	0.418432
ENSG00000078061	ARAF	6343.44	0.189598	0.167768	1.13012	0.258426	0.691906
ENSG00000078070	MCCC1	3223.14	-0.458336	0.333665	-1.37364	0.169553	0.614295
ENSG00000078081	LAMP3	58.6415	0.159265	0.934525	0.170424	0.864677	0.970793
ENSG00000078098	FAP	5.5013	1.22759	3.02052	0.406418	0.684435	NA
ENSG00000078114	NEBL	7.05288	0.835445	2.94538	0.283646	0.776681	0.944655
ENSG00000078124	ACER3	1168.93	0.188119	0.28309	0.664519	0.506358	0.843008
ENSG00000078140	UBE2K	2825.62	0.136817	0.170318	0.8033	0.421801	0.799086
ENSG00000078142	PIK3C3	1582.56	-0.17336	0.366114	-0.473514	0.635846	0.895305
ENSG00000078177	N4BP2	2700.37	-0.0350543	0.164681	-0.212862	0.831434	0.960241
ENSG00000078237	TIGAR	915.147	0.34999	0.420761	0.831803	0.40552	0.791938
ENSG00000078246	TULP3	496.685	-0.307783	0.429918	-0.715912	0.474046	0.825957
ENSG00000078269	SYNJ2	2346.88	0.873973	0.485534	1.80002	0.0718567	0.486366
ENSG00000078295	ADCY2	142.658	1.75888	1.14448	1.53684	0.124333	0.56163
ENSG00000078304	PPP2R5C	4516.74	0.233895	0.218528	1.07032	0.284475	0.713575
ENSG00000078319	PMS2P1	1589.61	-0.0371922	0.23532	-0.15805	0.874418	0.973208
ENSG00000078328	RBFOX1	4.18392	0.819094	1.4728	0.556147	0.57811	NA
ENSG00000078369	GNB1	24307.3	-0.0716934	0.370695	-0.193403	0.846644	0.966056
ENSG00000078399	HOXA9	2655.54	0.533781	0.288266	1.8517	0.0640696	0.472294
ENSG00000078401	EDN1	116.632	-1.1302	0.926049	-1.22046	0.222292	0.660903
ENSG00000078403	MLLT10	1086.23	0.0455	0.188745	0.241066	0.809504	0.95362
ENSG00000078487	ZCWPW1	216.337	-0.134475	0.380409	-0.353501	0.723713	0.928712
ENSG00000078549	ADCYAP1R1	0.425383	0.840619	3.04091	0.276437	0.782213	NA
ENSG00000078579	FGF20	3.25586	-0.35723	2.97374	-0.120128	0.904381	NA
ENSG00000078589	P2RY10	101.52	-1.08666	0.704685	-1.54205	0.123062	0.55888
ENSG00000078596	ITM2A	18444.3	0.325398	0.40242	0.808602	0.418744	0.798011
ENSG00000078618	NRDC	8909.96	-0.211283	0.216405	-0.976334	0.328899	0.747676
ENSG00000078668	VDAC3	9607.61	-0.0767928	0.234206	-0.327886	0.742998	0.935514
ENSG00000078674	PCM1	6668.42	0.138684	0.191224	0.725244	0.468302	0.822026
ENSG00000078687	TNRC6C	370.925	-0.251364	0.463648	-0.542145	0.587719	0.876122
ENSG00000078699	CBFA2T2	1034.67	-0.425486	0.290636	-1.46399	0.143198	0.587303
ENSG00000078725	BRINP1	0.238113	1.32545	3.04818	0.434833	0.663683	NA
ENSG00000078747	ITCH	1595.93	0.264501	0.287126	0.921202	0.356945	0.764672
ENSG00000078795	PKD2L2	41.6049	0.841618	0.599055	1.40491	0.160048	0.606453
ENSG00000078804	TP53INP2	729.56	-0.0018449	0.421132	-0.00438082	0.996505	0.998848
ENSG00000078808	SDF4	11634.9	0.073162	0.212777	0.343843	0.730964	0.931609
ENSG00000078814	MYH7B	34.4493	0.229425	0.812282	0.282445	0.777602	0.944655
ENSG00000078898	BPIFB2	0.106346	0.811163	3.0522	0.265763	0.790422	NA
ENSG00000078900	TP73	35.5938	-2.98924	0.919442	-3.25115	0.00114941	0.0873352
ENSG00000078902	TOLLIP	4073.76	0.0408366	0.248796	0.164137	0.869624	0.972535
ENSG00000078967	UBE2D4	515.64	0.0948841	0.284639	0.333348	0.738871	0.933567
ENSG00000079101	CLUL1	17.4522	3.32045	1.11119	2.9882	0.00280629	0.13766
ENSG00000079102	RUNX1T1	9.32291	-0.118808	2.37174	-0.0500933	0.960048	0.990667
ENSG00000079112	CDH17	2.26407	0.840525	3.01874	0.278436	0.780678	NA
ENSG00000079134	THOC1	1797.19	0.356324	0.386809	0.921187	0.356953	0.764672
ENSG00000079150	FKBP7	593.821	-0.521848	0.483891	-1.07844	0.280837	0.710379
ENSG00000079156	OSBPL6	133.878	0.566559	0.443321	1.27799	0.201254	0.642976
ENSG00000079215	SLC1A3	374.725	-0.340633	0.540443	-0.630286	0.528508	0.852687
ENSG00000079246	XRCC5	26580.9	-0.492444	0.19893	-2.47547	0.0133062	0.271254
ENSG00000079257	LXN	1524.11	-0.469501	0.470921	-0.996983	0.318773	0.739854
ENSG00000079263	SP140	121.46	-0.965159	0.487574	-1.97951	0.0477581	0.429587
ENSG00000079277	MKNK1	1730.55	-0.0995525	0.313096	-0.317962	0.750514	0.937677
ENSG00000079308	TNS1	885.571	-0.0839626	0.653172	-0.128546	0.897717	0.978114
ENSG00000079313	REXO1	1521.53	0.391438	0.374015	1.04658	0.295292	0.719707
ENSG00000079332	SAR1A	6041.13	0.145897	0.308762	0.472521	0.636555	0.895338
ENSG00000079335	CDC14A	1154.55	0.186644	0.217216	0.859254	0.390201	0.783032
ENSG00000079337	RAPGEF3	329.241	-0.38859	0.502752	-0.772926	0.439566	0.805143
ENSG00000079385	CEACAM1	626.107	-0.799525	0.654333	-1.22189	0.221748	0.660473
ENSG00000079387	SENP1	1279.62	-0.354152	0.157592	-2.24727	0.0246229	0.349488
ENSG00000079393	DUSP13	12.5771	-5.7632	1.9634	-2.93532	0.00333201	0.151504
ENSG00000079432	CIC	972.961	0.687795	0.325423	2.11354	0.0345545	0.388254
ENSG00000079435	LIPE	172.688	-0.956766	0.595735	-1.60603	0.108268	0.538956
ENSG00000079459	FDFT1	10269.1	0.277681	0.223661	1.24153	0.214411	0.654428
ENSG00000079462	PAFAH1B3	1549.64	-0.663844	0.323559	-2.05169	0.0401995	0.408135
ENSG00000079482	OPHN1	94.0084	-0.132062	0.57827	-0.228375	0.819355	0.955293
ENSG00000079557	AFM	0.334538	-0.0318549	3.03993	-0.0104788	0.991639	NA
ENSG00000079616	KIF22	5983.17	-0.366033	0.259131	-1.41254	0.157791	0.602418
ENSG00000079689	SCGN	0	NA	NA	NA	NA	NA
ENSG00000079691	CARMIL1	150.926	-0.603252	0.435365	-1.38562	0.165862	0.611424
ENSG00000079739	PGM1	4554.73	0.0552175	0.21284	0.259432	0.795302	0.950412
ENSG00000079785	DDX1	9258.27	-0.321722	0.177057	-1.81706	0.0692087	0.482123
ENSG00000079805	DNM2	14666.9	0.0557735	0.189105	0.294935	0.768044	0.942421
ENSG00000079819	EPB41L2	1739.36	-0.809538	0.543217	-1.49027	0.136154	0.57664
ENSG00000079841	RIMS1	50.8116	0.0741634	2.93778	0.0252447	0.97986	0.996219
ENSG00000079931	MOXD1	39.0501	-0.503785	2.97167	-0.169529	0.86538	0.970998
ENSG00000079950	STX7	2843.96	-0.000394921	0.26369	-0.00149767	0.998805	0.999714
ENSG00000079974	RABL2B	1151.23	-0.175367	0.210795	-0.83193	0.405449	0.791938
ENSG00000079999	KEAP1	5609.68	-0.299253	0.315481	-0.948563	0.342843	0.754077
ENSG00000080007	DDX43	17.4896	-0.536846	1.51646	-0.354013	0.723329	0.928451
ENSG00000080031	PTPRH	37.4083	-0.419944	1.08965	-0.385392	0.699947	0.9193
ENSG00000080166	DCT	1.53068	0.421052	3.01775	0.139525	0.889035	NA
ENSG00000080189	SLC35C2	3959.75	-0.127246	0.220409	-0.577318	0.563725	0.868385
ENSG00000080200	CRYBG3	109.9	-0.119014	0.37215	-0.319802	0.749119	0.937126
ENSG00000080224	EPHA6	0.827036	-0.673788	3.02202	-0.22296	0.823567	NA
ENSG00000080293	SCTR	0.0749123	0.70817	3.05946	0.231469	0.81695	NA
ENSG00000080298	RFX3	426.31	0.145975	0.201386	0.724855	0.468541	0.822312
ENSG00000080345	RIF1	4050.64	-0.213553	0.265621	-0.803975	0.421411	0.799086
ENSG00000080371	RAB21	5991.35	0.388479	0.366607	1.05966	0.289299	0.716939
ENSG00000080493	SLC4A4	83.6404	-2.84965	0.733631	-3.8843	0.000102624	0.0200362
ENSG00000080503	SMARCA2	7375.87	-0.416203	0.206585	-2.01468	0.0439384	0.417723
ENSG00000080511	RDH8	1.25263	0.761553	3.0386	0.250626	0.802103	NA
ENSG00000080546	SESN1	4783.48	0.723326	0.415211	1.74207	0.0814961	0.49778
ENSG00000080561	MID2	65.2225	-2.07573	1.3933	-1.48979	0.136279	0.57664
ENSG00000080572	PIH1D3	0	NA	NA	NA	NA	NA
ENSG00000080573	COL5A3	5.93656	1.12684	2.96552	0.379981	0.703959	NA
ENSG00000080603	SRCAP	234.053	-0.152557	0.352564	-0.432708	0.665227	0.905939
ENSG00000080608	PUM3	2272.01	-0.29843	0.215523	-1.38468	0.166151	0.611776
ENSG00000080618	CPB2	15.8241	1.99941	1.21162	1.65019	0.0989043	0.526787
ENSG00000080644	CHRNA3	2.51228	0.401191	2.99668	0.133878	0.893499	NA
ENSG00000080709	KCNN2	6.17085	0.258304	2.99846	0.0861456	0.931351	NA
ENSG00000080802	CNOT4	1133.4	0.0261186	0.230952	0.113091	0.909958	0.979961
ENSG00000080815	PSEN1	3093.99	-0.00136072	0.3539	-0.00384494	0.996932	0.998922
ENSG00000080819	CPOX	782.055	-0.990773	0.397136	-2.49479	0.012603	0.264185
ENSG00000080822	CLDND1	2396.54	0.680111	0.261213	2.60367	0.00922329	0.239389
ENSG00000080823	MOK	210.126	-0.148109	0.405986	-0.364813	0.715251	0.92479
ENSG00000080824	HSP90AA1	30955.5	-0.0288987	0.163905	-0.176314	0.860047	0.969603
ENSG00000080839	RBL1	1427.14	-0.594742	0.258568	-2.30014	0.0214404	0.332862
ENSG00000080845	DLGAP4	1487	0.101696	0.351114	0.289638	0.772093	0.94376
ENSG00000080854	IGSF9B	33.4681	1.65746	2.98635	0.555013	0.578886	0.872904
ENSG00000080910	CFHR2	0	NA	NA	NA	NA	NA
ENSG00000080947	CROCCP3	82.2623	0.608154	0.682221	0.891433	0.372697	0.77296
ENSG00000080986	NDC80	1403.72	-0.483979	0.403042	-1.20082	0.229823	0.667254
ENSG00000081014	AP4E1	631.775	0.355	0.348769	1.01787	0.308742	0.731493
ENSG00000081019	RSBN1	3292.35	0.0199877	0.157612	0.126816	0.899086	0.978243
ENSG00000081026	MAGI3	255.539	-0.724724	0.711591	-1.01846	0.308461	0.731493
ENSG00000081041	CXCL2	5789.77	1.03333	0.590527	1.74984	0.0801466	0.497036
ENSG00000081051	AFP	0	NA	NA	NA	NA	NA
ENSG00000081052	COL4A4	17.9789	0.122042	1.40546	0.0868348	0.930803	0.984794
ENSG00000081059	TCF7	376.174	-0.657089	0.562847	-1.16744	0.243033	0.678406
ENSG00000081087	OSTM1	1465.59	-0.436059	0.626392	-0.696144	0.486339	0.832044
ENSG00000081138	CDH7	86.3212	-2.89481	0.885255	-3.27002	0.00107539	0.0825769
ENSG00000081148	IMPG2	4.05612	-1.10129	2.98198	-0.369316	0.711892	NA
ENSG00000081154	PCNP	15367.6	0.395773	0.269571	1.46816	0.142062	0.585908
ENSG00000081177	EXD2	1330.82	0.0484314	0.396481	0.122153	0.902778	0.978898
ENSG00000081181	ARG2	226.422	-1.13643	0.684878	-1.65931	0.0970531	0.523081
ENSG00000081189	MEF2C	5813.35	-0.296943	0.338191	-0.878033	0.379926	0.778467
ENSG00000081237	PTPRC	17751	0.290746	0.253314	1.14777	0.251063	0.684551
ENSG00000081248	CACNA1S	0	NA	NA	NA	NA	NA
ENSG00000081277	PKP1	0.131767	0.783043	3.0508	0.256668	0.797435	NA
ENSG00000081307	UBA5	2819.97	-0.300592	0.234803	-1.28019	0.200479	0.64238
ENSG00000081320	STK17B	13791.5	0.149807	0.43285	0.346094	0.729272	0.931144
ENSG00000081377	CDC14B	221.95	-2.15923	0.917679	-2.35293	0.0186262	0.315238
ENSG00000081386	ZNF510	345.129	-0.353974	0.49303	-0.717956	0.472784	0.82548
ENSG00000081479	LRP2	4.22437	-2.11838	2.98288	-0.710179	0.477593	NA
ENSG00000081665	ZNF506	906.647	0.00721329	0.277518	0.0259922	0.979264	0.996086
ENSG00000081692	JMJD4	474.763	-0.0864353	0.34429	-0.251054	0.801772	0.952102
ENSG00000081721	DUSP12	1734.98	0.0850027	0.227249	0.37405	0.708367	0.922138
ENSG00000081760	AACS	935.526	-0.380682	0.262689	-1.44917	0.147289	0.591841
ENSG00000081791	DELE1	2874.31	-0.199721	0.223694	-0.892831	0.371948	0.77296
ENSG00000081800	SLC13A1	0.536097	1.18355	3.03967	0.389369	0.697003	NA
ENSG00000081803	CADPS2	81.0359	-2.55735	1.17745	-2.17193	0.0298607	0.371535
ENSG00000081818	PCDHB4	19.1061	-0.19628	1.28816	-0.152373	0.878893	0.974053
ENSG00000081842	PCDHA6	0.819758	0.398063	3.0397	0.130955	0.895811	NA
ENSG00000081853	PCDHGA2	23.4468	-0.744002	1.74554	-0.426229	0.669941	0.908011
ENSG00000081870	HSPB11	2262.09	0.0566469	0.252379	0.224452	0.822406	0.956775
ENSG00000081913	PHLPP1	515.644	-0.190026	0.265263	-0.716368	0.473764	0.82594
ENSG00000081923	ATP8B1	49.1481	-2.02665	0.950638	-2.13188	0.0330166	0.383271
ENSG00000081985	IL12RB2	1336.96	-1.68675	0.602639	-2.79895	0.00512698	0.185132
ENSG00000082014	SMARCD3	1782.27	0.529494	0.445512	1.18851	0.234634	0.671053
ENSG00000082068	WDR70	1977.23	-0.437716	0.309769	-1.41304	0.157644	0.602161
ENSG00000082074	FYB1	3858.09	-0.538174	0.448358	-1.20032	0.230014	0.667322
ENSG00000082126	MPP4	1.10132	1.31238	3.03084	0.433009	0.665008	NA
ENSG00000082146	STRADB	3668.23	-0.721398	0.299238	-2.41078	0.0159185	0.293585
ENSG00000082153	BZW1	23761.4	0.359519	0.335187	1.07259	0.283453	0.713013
ENSG00000082175	PGR	5.82602	-0.211687	2.97476	-0.0711609	0.94327	NA
ENSG00000082196	C1QTNF3	61.1185	-0.508065	0.677892	-0.749478	0.453569	0.812573
ENSG00000082212	ME2	4692.34	-0.389642	0.306875	-1.26971	0.204188	0.645793
ENSG00000082213	C5orf22	1797.52	-0.403482	0.211444	-1.90822	0.0563622	0.456494
ENSG00000082258	CCNT2	2028.88	0.0533593	0.261716	0.203882	0.838445	0.962965
ENSG00000082269	FAM135A	717.182	-0.00164008	0.284562	-0.00576352	0.995401	0.99848
ENSG00000082293	COL19A1	3.07796	-0.856455	2.98001	-0.2874	0.773806	NA
ENSG00000082397	EPB41L3	1302.37	0.0999422	0.707598	0.141242	0.887679	0.975979
ENSG00000082438	COBLL1	1800.02	-0.674437	0.399313	-1.68899	0.0912208	0.513832
ENSG00000082458	DLG3	138.042	-2.88112	1.03389	-2.78669	0.00532491	0.187242
ENSG00000082482	KCNK2	0	NA	NA	NA	NA	NA
ENSG00000082497	SERTAD4	0.279773	1.32127	3.04853	0.433413	0.664715	NA
ENSG00000082512	TRAF5	1818.5	-0.0220988	0.424096	-0.052108	0.958443	0.990213
ENSG00000082515	MRPL22	2313.98	0.264898	0.229362	1.15494	0.248117	0.682078
ENSG00000082516	GEMIN5	1004.65	-1.22928	0.44942	-2.73526	0.00623308	0.19964
ENSG00000082556	OPRK1	3.21529	0.632465	2.97992	0.212242	0.831918	NA
ENSG00000082641	NFE2L1	1654.55	-0.233364	0.228492	-1.02132	0.307103	0.7308
ENSG00000082684	SEMA5B	12.6512	3.09602	1.23935	2.4981	0.0124861	0.264185
ENSG00000082701	GSK3B	2518.87	0.545128	0.214786	2.538	0.0111487	0.253558
ENSG00000082781	ITGB5	1116.04	-0.0968269	0.620601	-0.156021	0.876016	0.97372
ENSG00000082805	ERC1	1471.65	0.0565073	0.241649	0.233841	0.815109	0.9541
ENSG00000082898	XPO1	3959.58	-0.483282	0.370191	-1.30549	0.191725	0.633579
ENSG00000082929	LINC01587	2.01813	0.362149	2.99402	0.120958	0.903725	NA
ENSG00000082996	RNF13	3773.54	0.0297123	0.300241	0.0989616	0.921169	0.982138
ENSG00000083067	TRPM3	0.884438	1.70845	3.0155	0.566558	0.571014	NA
ENSG00000083093	PALB2	740.131	-0.265043	0.294145	-0.901062	0.367555	0.770761
ENSG00000083097	DOPEY1	302.334	0.477009	0.555705	0.858386	0.390679	0.783093
ENSG00000083099	LYRM2	2487.27	0.170604	0.216986	0.786243	0.431725	0.803115
ENSG00000083123	BCKDHB	2195.49	-0.720361	0.347979	-2.07013	0.0384402	0.401175
ENSG00000083168	KAT6A	2684.75	0.128733	0.304152	0.423252	0.672111	0.90899
ENSG00000083223	TUT7	2249.61	0.640128	0.306154	2.09087	0.0365395	0.394658
ENSG00000083290	ULK2	995.203	-0.86259	0.34876	-2.47331	0.013387	0.271881
ENSG00000083307	GRHL2	0.10463	-0.114759	3.05373	-0.03758	0.970023	NA
ENSG00000083312	TNPO1	3879.75	-0.0140926	0.182063	-0.0774055	0.938301	0.986159
ENSG00000083444	PLOD1	2738.97	-0.163264	0.420698	-0.388078	0.697958	0.918508
ENSG00000083454	P2RX5	263.295	-0.97419	0.401111	-2.42873	0.0151518	0.287065
ENSG00000083457	ITGAE	2705.64	0.275381	0.327586	0.840636	0.400552	0.788798
ENSG00000083520	DIS3	3341.96	-0.13877	0.219476	-0.632277	0.527206	0.851944
ENSG00000083535	PIBF1	1908.3	0.209505	0.229555	0.912657	0.361423	0.767588
ENSG00000083544	TDRD3	490.584	-0.1378	0.2413	-0.571073	0.56795	0.869832
ENSG00000083622	AC000061.1	0	NA	NA	NA	NA	NA
ENSG00000083635	NUFIP1	1036.49	-0.127279	0.165427	-0.769396	0.441658	0.806324
ENSG00000083642	PDS5B	3505.35	-0.187773	0.266983	-0.703316	0.481859	0.830493
ENSG00000083720	OXCT1	2118.98	-1.15585	0.396249	-2.91698	0.00353442	0.155794
ENSG00000083750	RRAGB	1625.27	-0.195301	0.298406	-0.65448	0.512802	0.84571
ENSG00000083782	EPYC	0	NA	NA	NA	NA	NA
ENSG00000083799	CYLD	6239.65	0.603481	0.373055	1.61767	0.105734	0.535095
ENSG00000083807	SLC27A5	319.439	-0.390908	0.350907	-1.114	0.265281	0.6977
ENSG00000083812	ZNF324	968.351	-0.0490731	0.254268	-0.192997	0.846961	0.966057
ENSG00000083814	ZNF671	948.281	0.0609598	0.241802	0.252106	0.800959	0.951993
ENSG00000083817	ZNF416	533.364	-0.597695	0.304714	-1.9615	0.0498211	0.434953
ENSG00000083828	ZNF586	1328.92	0.0918348	0.293788	0.312589	0.754593	0.938321
ENSG00000083838	ZNF446	122.408	-0.204821	0.2314	-0.88514	0.376081	0.775538
ENSG00000083844	ZNF264	524.091	0.32915	0.289555	1.13674	0.255645	0.688234
ENSG00000083845	RPS5	29615.3	0.358581	0.304749	1.17664	0.239338	0.675111
ENSG00000083857	FAT1	7.98008	0.600394	1.98907	0.301847	0.762769	0.940677
ENSG00000083896	YTHDC1	1274.28	0.792938	0.297591	2.66452	0.0077098	0.220361
ENSG00000083937	CHMP2B	5441.41	0.701568	0.311163	2.25466	0.0241545	0.347157
ENSG00000084070	SMAP2	11297.7	-0.291228	0.345791	-0.842208	0.399672	0.788335
ENSG00000084072	PPIE	3434.46	-0.315894	0.361932	-0.872798	0.382773	0.780501
ENSG00000084073	ZMPSTE24	3622.44	-0.157396	0.254691	-0.617989	0.536582	0.856883
ENSG00000084090	STARD7	14629.5	-0.417449	0.17488	-2.38706	0.0169837	0.300792
ENSG00000084092	NOA1	1952.54	-0.118915	0.261071	-0.45549	0.648757	0.89966
ENSG00000084093	REST	7021.77	0.00808038	0.192973	0.0418731	0.9666	0.992202
ENSG00000084110	HAL	720.198	-0.11261	0.571936	-0.196892	0.843912	0.965137
ENSG00000084112	SSH1	1342.47	0.385858	0.36405	1.0599	0.289188	0.7169
ENSG00000084207	GSTP1	29666.6	0.0598029	0.208186	0.287258	0.773915	0.944351
ENSG00000084234	APLP2	47196.8	0.0621791	0.371184	0.167515	0.866965	0.971498
ENSG00000084444	FAM234B	452.168	-0.61268	0.440379	-1.39126	0.164147	0.610045
ENSG00000084453	SLCO1A2	0.212692	0.83014	3.04486	0.272637	0.785133	NA
ENSG00000084463	WBP11	14041.1	0.162798	0.237547	0.685332	0.493134	0.835644
ENSG00000084623	EIF3I	11661	0.123296	0.259417	0.475281	0.634587	0.894736
ENSG00000084628	NKAIN1	8.16984	-2.97339	2.12869	-1.39682	0.162469	0.608812
ENSG00000084636	COL16A1	52.8927	1.02341	0.647415	1.58076	0.113934	0.547697
ENSG00000084652	TXLNA	3913.85	-0.0624082	0.178222	-0.350171	0.726211	0.930029
ENSG00000084674	APOB	1.55974	-0.623679	3.02397	-0.206245	0.8366	NA
ENSG00000084676	NCOA1	3698.41	-0.205505	0.299605	-0.68592	0.492764	0.835537
ENSG00000084693	AGBL5	3048.83	-0.430949	0.30153	-1.42921	0.152945	0.597737
ENSG00000084710	EFR3B	28.9634	1.13707	0.880786	1.29098	0.196712	0.639195
ENSG00000084731	KIF3C	246.177	-0.617457	0.516605	-1.19522	0.232001	0.668708
ENSG00000084733	RAB10	8439.22	-0.392883	0.337607	-1.16373	0.244534	0.679568
ENSG00000084734	GCKR	6.24318	0.322369	2.98498	0.107997	0.913998	NA
ENSG00000084754	HADHA	17148.7	-0.0658625	0.192158	-0.342751	0.731786	0.931777
ENSG00000084764	MAPRE3	218.176	0.147433	0.226814	0.650018	0.515681	0.846819
ENSG00000084774	CAD	3130.87	-0.950842	0.321801	-2.95475	0.00312919	0.145368
ENSG00000085063	CD59	5104.31	0.0481874	0.276518	0.174265	0.861657	0.96999
ENSG00000085117	CD82	19857.7	0.0751245	0.224818	0.334156	0.738262	0.93323
ENSG00000085185	BCORL1	286.795	-1.17303	0.475578	-2.46653	0.013643	0.273755
ENSG00000085224	ATRX	4955.34	-0.242027	0.344336	-0.70288	0.482131	0.830797
ENSG00000085231	AK6	1677.27	-0.332934	0.252776	-1.31711	0.187801	0.631165
ENSG00000085265	FCN1	16242.8	-1.43476	0.563338	-2.54689	0.0108686	0.252605
ENSG00000085274	MYNN	1501.34	0.130166	0.221427	0.587851	0.556632	0.865682
ENSG00000085276	MECOM	1290.66	-1.84379	0.665326	-2.77126	0.00558406	0.191055
ENSG00000085365	SCAMP1	2879.47	0.0354961	0.289343	0.122678	0.902362	0.978898
ENSG00000085377	PREP	2329.67	-0.309206	0.280127	-1.10381	0.269676	0.701467
ENSG00000085382	HACE1	1024.5	-0.397108	0.252072	-1.57537	0.11517	0.548308
ENSG00000085415	SEH1L	4665.32	-0.0497172	0.183151	-0.271454	0.786042	0.946701
ENSG00000085433	WDR47	1295.46	-0.0806853	0.200529	-0.402363	0.687417	0.914438
ENSG00000085449	WDFY1	5223.86	0.46139	0.369542	1.24855	0.211831	0.651894
ENSG00000085465	OVGP1	50.0509	0.506508	1.11488	0.454317	0.649601	0.899679
ENSG00000085491	SLC25A24	2118.05	-0.0509837	0.33643	-0.151544	0.879547	0.974114
ENSG00000085511	MAP3K4	855.526	-0.479559	0.30552	-1.56965	0.116497	0.549265
ENSG00000085514	PILRA	2094.52	-0.866892	0.467865	-1.85287	0.063901	0.472294
ENSG00000085552	IGSF9	68.4867	1.33135	0.876617	1.51874	0.128828	0.567174
ENSG00000085563	ABCB1	1698.64	0.0521431	0.337567	0.154467	0.877241	0.973777
ENSG00000085644	ZNF213	429.088	0.0312992	0.282024	0.110981	0.911632	0.979965
ENSG00000085662	AKR1B1	6834.67	-0.711629	0.293655	-2.42335	0.0153782	0.288836
ENSG00000085719	CPNE3	5787.39	-0.201247	0.222586	-0.904131	0.365926	0.769202
ENSG00000085721	RRN3	3745.78	0.198713	0.293412	0.677247	0.498249	0.838281
ENSG00000085733	CTTN	262.845	-1.17616	0.735688	-1.59872	0.109882	0.541154
ENSG00000085741	WNT11	139.717	0.442873	0.640416	0.69154	0.489226	0.833703
ENSG00000085760	MTIF2	1561.94	-0.389499	0.296748	-1.31256	0.189332	0.631244
ENSG00000085788	DDHD2	3294.75	-0.0959706	0.256276	-0.374481	0.708047	0.922069
ENSG00000085831	TTC39A	32.0883	1.09104	0.966577	1.12877	0.258997	0.692624
ENSG00000085832	EPS15	5775.81	-0.0321856	0.208603	-0.154291	0.87738	0.973777
ENSG00000085840	ORC1	1840.62	-0.609048	0.29046	-2.09684	0.0360078	0.391982
ENSG00000085871	MGST2	1990.44	-0.222526	0.40961	-0.543264	0.586948	0.876122
ENSG00000085872	CHERP	2594.18	-0.209279	0.294471	-0.710694	0.477274	0.827745
ENSG00000085978	ATG16L1	1056.07	-0.296363	0.245404	-1.20765	0.22718	0.665374
ENSG00000085982	USP40	555.534	0.00466547	0.233477	0.0199826	0.984057	0.996595
ENSG00000085998	POMGNT1	2530.49	-0.523529	0.249921	-2.09478	0.0361909	0.392856
ENSG00000085999	RAD54L	749.907	-0.792854	0.421896	-1.87926	0.0602088	0.465622
ENSG00000086015	MAST2	1044.57	-0.3422	0.315716	-1.08389	0.278415	0.707795
ENSG00000086061	DNAJA1	12358.9	0.163702	0.194566	0.841372	0.40014	0.788525
ENSG00000086062	B4GALT1	1747.68	0.233005	0.299669	0.777542	0.436839	0.803791
ENSG00000086065	CHMP5	2987.15	0.385483	0.293601	1.31295	0.1892	0.631244
ENSG00000086102	NFX1	3272.04	0.257993	0.239701	1.07631	0.281788	0.710879
ENSG00000086159	AQP6	3.1849	-0.424264	3.00508	-0.141182	0.887726	NA
ENSG00000086189	DIMT1	3452.01	-0.318175	0.297031	-1.07118	0.284087	0.713575
ENSG00000086200	IPO11	1939.48	-0.348937	0.397765	-0.877244	0.380354	0.778733
ENSG00000086205	FOLH1	61.6368	1.39713	0.962568	1.45146	0.146652	0.590969
ENSG00000086232	EIF2AK1	14492.4	-0.331695	0.194249	-1.70758	0.0877146	0.507241
ENSG00000086288	NME8	101.987	-0.304482	0.745538	-0.408406	0.682976	0.912402
ENSG00000086289	EPDR1	2115.82	-1.06182	0.536404	-1.97952	0.047758	0.429587
ENSG00000086300	SNX10	3549.45	0.0796076	0.341729	0.232955	0.815796	0.954116
ENSG00000086475	SEPHS1	3547.86	-0.541125	0.23524	-2.30031	0.0214304	0.332862
ENSG00000086504	MRPL28	3933.26	-0.0277572	0.155856	-0.178096	0.858648	0.969289
ENSG00000086506	HBQ1	144.374	-1.30629	0.562375	-2.32281	0.0201891	0.325454
ENSG00000086544	ITPKC	1044.34	-0.283789	0.385206	-0.73672	0.461292	0.817591
ENSG00000086548	CEACAM6	1748.5	-0.598745	0.759547	-0.788292	0.430526	0.803115
ENSG00000086570	FAT2	5.88903	-1.25994	2.9965	-0.420471	0.674142	NA
ENSG00000086589	RBM22	5522.9	0.0849234	0.20123	0.422022	0.673009	0.909327
ENSG00000086598	TMED2	30985.8	0.20682	0.233406	0.886098	0.375565	0.774914
ENSG00000086619	ERO1B	1036.67	0.60086	0.375653	1.59951	0.109708	0.540848
ENSG00000086666	ZFAND6	5542.2	0.602931	0.256048	2.35475	0.0185349	0.314768
ENSG00000086696	HSD17B2	31.012	0.989157	3.01891	0.327653	0.743174	0.935561
ENSG00000086712	TXLNG	1094.19	-0.298675	0.312754	-0.954986	0.339585	0.752841
ENSG00000086717	PPEF1	4.10798	-0.723207	3.01569	-0.239814	0.810474	NA
ENSG00000086730	LAT2	10555	-0.261506	0.282338	-0.926217	0.354333	0.763058
ENSG00000086758	HUWE1	2419.53	-0.101851	0.319827	-0.318456	0.750139	0.937452
ENSG00000086827	ZW10	1754.86	-0.223138	0.274447	-0.813044	0.416193	0.796782
ENSG00000086848	ALG9	111.661	-0.282406	0.378124	-0.74686	0.455148	0.814072
ENSG00000086967	MYBPC2	11.5183	1.71822	2.39995	0.715942	0.474027	0.825957
ENSG00000086991	NOX4	0.798861	1.10779	3.03285	0.365263	0.714915	NA
ENSG00000087008	ACOX3	1054.9	-0.371729	0.33416	-1.11243	0.265954	0.698163
ENSG00000087053	MTMR2	3178.36	-0.0441319	0.150187	-0.293847	0.768875	0.942594
ENSG00000087074	PPP1R15A	37543.3	0.493057	0.365987	1.3472	0.177916	0.622775
ENSG00000087076	HSD17B14	203.34	-0.567736	0.576808	-0.984272	0.324982	0.744171
ENSG00000087077	TRIP6	3644.71	-0.0482843	0.270917	-0.178225	0.858546	0.969289
ENSG00000087085	ACHE	98.1847	-1.07323	0.815438	-1.31613	0.188129	0.631244
ENSG00000087086	FTL	416808	0.384025	0.409171	0.938544	0.347965	0.757602
ENSG00000087087	SRRT	10378.2	-0.070424	0.176904	-0.398091	0.690563	0.915865
ENSG00000087088	BAX	3872.31	0.185635	0.20399	0.910018	0.362813	0.767685
ENSG00000087095	NLK	396.342	-0.236561	0.411417	-0.57499	0.565298	0.868843
ENSG00000087111	PIGS	4372.71	-0.217034	0.191429	-1.13376	0.256896	0.689892
ENSG00000087116	ADAMTS2	106.363	-0.652361	1.15743	-0.563628	0.573008	0.871759
ENSG00000087128	TMPRSS11E	0.106346	0.811163	3.0522	0.265763	0.790422	NA
ENSG00000087152	ATXN7L3	941.371	0.191685	0.249278	0.768961	0.441917	0.806356
ENSG00000087157	PGS1	3533.44	0.483198	0.216168	2.23529	0.0253984	0.351624
ENSG00000087191	PSMC5	5891.63	-0.234602	0.161501	-1.45264	0.146325	0.590313
ENSG00000087206	UIMC1	2526.79	0.251386	0.253287	0.992496	0.320955	0.741468
ENSG00000087237	CETP	1098.09	-2.12174	0.787181	-2.69536	0.00703128	0.211337
ENSG00000087245	MMP2	2168.21	0.671146	0.494623	1.35688	0.174818	0.620342
ENSG00000087250	MT3	3.07608	0.445547	3.00175	0.148429	0.882004	NA
ENSG00000087253	LPCAT2	7242.88	-0.261336	0.285374	-0.915768	0.359789	0.766841
ENSG00000087258	GNAO1	3.15854	1.4038	2.41235	0.581922	0.560619	NA
ENSG00000087263	OGFOD1	2551.51	-0.149492	0.247886	-0.603068	0.546464	0.861178
ENSG00000087266	SH3BP2	2172.46	0.616532	0.328823	1.87497	0.0607974	0.467282
ENSG00000087269	NOP14	1855.13	-0.531144	0.216061	-2.45831	0.0139594	0.276378
ENSG00000087274	ADD1	10214.1	-0.138674	0.138585	-1.00064	0.317001	0.738108
ENSG00000087299	L2HGDH	425.968	-0.628295	0.380231	-1.6524	0.0984526	0.52554
ENSG00000087301	TXNDC16	900.463	-0.611913	0.596318	-1.02615	0.30482	0.728228
ENSG00000087302	RTRAF	7658.62	0.172208	0.162824	1.05763	0.290223	0.717447
ENSG00000087303	NID2	187.041	0.485889	0.600545	0.809079	0.418469	0.797937
ENSG00000087338	GMCL1	2518.86	-0.703963	0.513976	-1.36964	0.170799	0.616446
ENSG00000087365	SF3B2	13650.8	0.115832	0.204099	0.567531	0.570353	0.871063
ENSG00000087448	KLHL42	1030.88	-0.305113	0.20465	-1.4909	0.135988	0.57664
ENSG00000087460	GNAS	46364.4	-0.023382	0.320508	-0.0729528	0.941844	0.986743
ENSG00000087470	DNM1L	5004.56	-0.269267	0.20821	-1.29325	0.195926	0.638539
ENSG00000087494	PTHLH	4.41465	2.13658	2.99706	0.712894	0.475912	NA
ENSG00000087495	PHACTR3	21.1823	-4.06329	1.56825	-2.59096	0.00957078	0.243254
ENSG00000087502	ERGIC2	1621.66	0.288567	0.236292	1.22123	0.222	0.660888
ENSG00000087510	TFAP2C	8.3222	1.45203	3.0158	0.481474	0.630179	0.892939
ENSG00000087586	AURKA	712.624	-0.436015	0.575447	-0.757698	0.448632	0.810073
ENSG00000087589	CASS4	507.072	0.22686	0.30894	0.734318	0.462755	0.818237
ENSG00000087842	PIR	389.818	-0.514558	0.392546	-1.31082	0.189918	0.631636
ENSG00000087884	AAMDC	137.619	0.0498603	0.326216	0.152844	0.878521	0.97385
ENSG00000087903	RFX2	3399.13	0.160907	0.337309	0.47703	0.633341	0.89429
ENSG00000087995	METTL2A	656.905	-0.407975	0.250664	-1.62758	0.103615	0.532621
ENSG00000088002	SULT2B1	26.1798	1.09721	1.18971	0.922243	0.356402	0.764672
ENSG00000088035	ALG6	1235.88	-0.462852	0.382364	-1.2105	0.226087	0.664519
ENSG00000088038	CNOT3	1651.62	-0.162768	0.194454	-0.837049	0.402565	0.790399
ENSG00000088053	GP6	310.108	0.365632	0.532305	0.686886	0.492155	0.835355
ENSG00000088179	PTPN4	757.831	-0.0273314	0.310256	-0.0880931	0.929803	0.984388
ENSG00000088205	DDX18	4467.99	-0.206531	0.124858	-1.65413	0.0981015	0.524902
ENSG00000088247	KHSRP	4127.23	-0.364964	0.183649	-1.98729	0.0468907	0.427246
ENSG00000088256	GNA11	393.202	-0.351135	0.582004	-0.603321	0.546295	0.861178
ENSG00000088280	ASAP3	38.7386	0.556052	1.41619	0.39264	0.694586	0.916958
ENSG00000088298	EDEM2	4069.58	-0.0737389	0.23389	-0.315271	0.752556	0.937934
ENSG00000088305	DNMT3B	2349.87	-0.96733	0.385188	-2.51132	0.0120281	0.260129
ENSG00000088320	REM1	3.06557	1.26487	3.01841	0.419052	0.675178	NA
ENSG00000088325	TPX2	4932	-0.913033	0.391144	-2.33427	0.0195818	0.321651
ENSG00000088340	FER1L4	41.6828	-0.376385	1.71572	-0.219374	0.826359	0.957994
ENSG00000088356	PDRG1	3651.47	0.376157	0.302887	1.24191	0.214271	0.654428
ENSG00000088367	EPB41L1	53.5472	-1.06817	1.01132	-1.05622	0.290869	0.717447
ENSG00000088386	SLC15A1	0	NA	NA	NA	NA	NA
ENSG00000088387	DOCK9	54.8543	0.872343	1.10272	0.791083	0.428896	0.802614
ENSG00000088448	ANKRD10	5612.24	0.376884	0.265491	1.41957	0.155732	0.600934
ENSG00000088451	TGDS	786.847	0.711839	0.356728	1.99547	0.0459917	0.422777
ENSG00000088538	DOCK3	159.356	0.553247	0.401513	1.37791	0.168232	0.613193
ENSG00000088543	C3orf18	248.248	-0.548504	0.618485	-0.886851	0.375159	0.774725
ENSG00000088682	COQ9	1708.94	-0.421144	0.274432	-1.5346	0.124882	0.562216
ENSG00000088726	TMEM40	115.474	-1.50397	0.888455	-1.6928	0.090494	0.512116
ENSG00000088727	KIF9	895.797	0.252724	0.283706	0.890794	0.37304	0.773094
ENSG00000088756	ARHGAP28	13.9254	0.0454094	2.20762	0.0205694	0.983589	0.996486
ENSG00000088766	CRLS1	3716.75	-0.55372	0.280861	-1.97151	0.0486658	0.432878
ENSG00000088782	DEFB127	0	NA	NA	NA	NA	NA
ENSG00000088808	PPP1R13B	116.399	-0.779802	0.978236	-0.797151	0.425363	0.80101
ENSG00000088812	ATRN	1774.76	-0.205569	0.151063	-1.36082	0.173571	0.618855
ENSG00000088826	SMOX	5372.31	1.26082	0.575731	2.18995	0.0285277	0.365098
ENSG00000088827	SIGLEC1	681.629	-2.5491	0.85714	-2.97397	0.00293978	0.142095
ENSG00000088832	FKBP1A	4768.06	0.0567561	0.221683	0.256024	0.797932	0.950807
ENSG00000088833	NSFL1C	6326.12	-0.207464	0.138716	-1.4956	0.134759	0.575649
ENSG00000088836	SLC4A11	20.9976	2.26058	1.38813	1.62851	0.103416	0.532621
ENSG00000088854	C20orf194	516.918	0.678842	0.399179	1.70059	0.0890195	0.508664
ENSG00000088876	ZNF343	215.7	-0.217838	0.536378	-0.406128	0.684649	0.913271
ENSG00000088881	EBF4	96.405	1.35288	0.593647	2.27893	0.0226712	0.340241
ENSG00000088882	CPXM1	11622.5	-0.207483	0.405511	-0.511657	0.608891	0.884598
ENSG00000088888	MAVS	2866.82	-0.351676	0.197324	-1.78223	0.0747116	0.49043
ENSG00000088899	LZTS3	625.894	1.58493	0.603822	2.62483	0.00866931	0.231999
ENSG00000088926	F11	0	NA	NA	NA	NA	NA
ENSG00000088930	XRN2	8587.95	-0.0262866	0.156535	-0.167928	0.86664	0.971472
ENSG00000088970	KIZ	905.374	-0.160608	0.216618	-0.741432	0.458432	0.816369
ENSG00000088986	DYNLL1	4350.07	-0.473924	0.479204	-0.988981	0.322672	0.742759
ENSG00000088992	TESC	1895.72	-0.197094	0.409595	-0.481192	0.63038	0.892952
ENSG00000089006	SNX5	4241.73	0.1387	0.169415	0.818699	0.412958	0.795991
ENSG00000089009	RPL6	14792.3	0.125848	0.160582	0.7837	0.433216	0.803457
ENSG00000089012	SIRPG	18.0954	-0.438878	0.995776	-0.44074	0.659401	0.904351
ENSG00000089022	MAPKAPK5	3059.33	0.233857	0.272248	0.858982	0.39035	0.783093
ENSG00000089041	P2RX7	706.937	0.0719483	0.465951	0.154412	0.877285	0.973777
ENSG00000089048	ESF1	724.132	-0.209109	0.31789	-0.657803	0.510665	0.845056
ENSG00000089050	RBBP9	584.468	-0.663382	0.229807	-2.8867	0.00389306	0.163321
ENSG00000089053	ANAPC5	15069.2	-0.378178	0.282424	-1.33904	0.180556	0.625231
ENSG00000089057	SLC23A2	1276.52	0.297653	0.289879	1.02682	0.304508	0.727654
ENSG00000089060	SLC8B1	3727.59	0.491764	0.328651	1.49631	0.134573	0.575649
ENSG00000089063	TMEM230	10102.8	-0.195467	0.272211	-0.718074	0.472712	0.82548
ENSG00000089091	DZANK1	166.317	0.611739	0.376394	1.62526	0.104107	0.532621
ENSG00000089094	KDM2B	2194.87	-0.171112	0.230347	-0.742846	0.457575	0.815647
ENSG00000089101	CFAP61	5.68673	1.55835	2.99023	0.521149	0.602263	NA
ENSG00000089116	LHX5	0	NA	NA	NA	NA	NA
ENSG00000089123	TASP1	1003.07	0.190801	0.292565	0.652166	0.514294	0.846227
ENSG00000089127	OAS1	1029.45	0.680546	0.532823	1.27725	0.201516	0.64298
ENSG00000089154	GCN1	3377.21	-0.55421	0.273724	-2.0247	0.0428977	0.41665
ENSG00000089157	RPLP0	77990	0.296005	0.249946	1.18427	0.236305	0.672604
ENSG00000089159	PXN	3084.94	0.173615	0.251761	0.689604	0.490444	0.834594
ENSG00000089163	SIRT4	17.0473	0.710031	1.2443	0.570625	0.568254	0.870057
ENSG00000089169	RPH3A	42.3718	-2.29923	1.18667	-1.93756	0.0526773	0.444505
ENSG00000089177	KIF16B	754.204	-0.654788	0.281284	-2.32785	0.0199199	0.324026
ENSG00000089195	TRMT6	1099.43	-0.402257	0.379037	-1.06126	0.288572	0.716291
ENSG00000089199	CHGB	23.6398	-0.861179	1.43653	-0.599485	0.548849	0.861654
ENSG00000089220	PEBP1	22606.9	-0.0150646	0.233967	-0.0643877	0.948661	0.988184
ENSG00000089225	TBX5	0	NA	NA	NA	NA	NA
ENSG00000089234	BRAP	3960.16	0.351772	0.184441	1.90723	0.0564908	0.456867
ENSG00000089248	ERP29	6951.54	0.0520553	0.281882	0.18467	0.853488	0.967951
ENSG00000089250	NOS1	0.263534	0.799337	3.04406	0.262589	0.792868	NA
ENSG00000089280	FUS	14076.6	-0.360408	0.146276	-2.46389	0.0137438	0.275111
ENSG00000089289	IGBP1	1652.58	0.210522	0.187245	1.12431	0.26088	0.693511
ENSG00000089327	FXYD5	12065.9	0.375249	0.205775	1.82359	0.0682143	0.481703
ENSG00000089335	ZNF302	1123.91	-0.314963	0.282912	-1.11329	0.265585	0.698043
ENSG00000089351	GRAMD1A	3942.76	0.340251	0.278933	1.21983	0.222528	0.661009
ENSG00000089356	FXYD3	105.03	0.052226	0.659931	0.0791386	0.936922	0.985966
ENSG00000089472	HEPH	20.6493	-2.56623	2.03994	-1.25799	0.208394	0.648965
ENSG00000089486	CDIP1	2843.73	0.0747948	0.18946	0.39478	0.693005	0.91653
ENSG00000089505	CMTM1	86.1438	-0.0786249	0.696624	-0.112866	0.910137	0.979961
ENSG00000089558	KCNH4	50.0021	2.19177	0.839015	2.61231	0.00899316	0.235458
ENSG00000089597	GANAB	14380	-0.352169	0.211915	-1.66184	0.0965441	0.521891
ENSG00000089639	GMIP	4640.68	0.0565154	0.332559	0.169941	0.865057	0.970979
ENSG00000089682	RBM41	639.223	-0.0424557	0.276602	-0.15349	0.878012	0.973777
ENSG00000089685	BIRC5	5062.92	-0.705532	0.434296	-1.62454	0.10426	0.532724
ENSG00000089692	LAG3	1656.48	0.69389	0.419839	1.65275	0.0983816	0.525328
ENSG00000089693	MLF2	17220	0.261243	0.281431	0.928266	0.35327	0.761979
ENSG00000089723	OTUB2	55.2074	1.15409	1.31416	0.878193	0.379839	0.778412
ENSG00000089737	DDX24	10767.4	0.560598	0.308444	1.81751	0.0691396	0.482123
ENSG00000089775	ZBTB25	532.572	0.241276	0.229566	1.05101	0.293255	0.718538
ENSG00000089818	NECAP1	2787.25	0.295993	0.360377	0.821343	0.411451	0.794419
ENSG00000089820	ARHGAP4	13012.7	0.23671	0.221736	1.06753	0.285733	0.71417
ENSG00000089847	ANKRD24	32.9441	-0.804749	0.974863	-0.8255	0.409088	0.793128
ENSG00000089876	DHX32	2160.39	0.112147	0.226741	0.494604	0.62088	0.888882
ENSG00000089902	RCOR1	1019.87	-0.0435026	0.339754	-0.128042	0.898116	0.978114
ENSG00000089916	GPATCH2L	2409.86	0.431424	0.239444	1.80178	0.0715806	0.486276
ENSG00000090006	LTBP4	3333.21	0.0533406	0.392957	0.135742	0.892026	0.977231
ENSG00000090013	BLVRB	6769.35	-0.364363	0.445318	-0.818208	0.413238	0.796087
ENSG00000090020	SLC9A1	843.888	-0.131831	0.33321	-0.395638	0.692372	0.916475
ENSG00000090054	SPTLC1	4406.66	-0.145346	0.212496	-0.683996	0.493978	0.835816
ENSG00000090060	PAPOLA	9392.85	0.0983533	0.152716	0.644028	0.519557	0.848336
ENSG00000090061	CCNK	327.307	0.710862	0.324927	2.18776	0.0286871	0.365717
ENSG00000090097	PCBP4	95.1435	-1.2988	0.859293	-1.51147	0.130668	0.569511
ENSG00000090104	RGS1	2712.28	-0.0780547	0.600469	-0.12999	0.896575	0.978114
ENSG00000090238	YPEL3	3053	-0.130361	0.244423	-0.533341	0.593797	0.878425
ENSG00000090263	MRPS33	851.761	-0.37862	0.329281	-1.14984	0.25021	0.684197
ENSG00000090266	NDUFB2	2095.09	-0.225718	0.287931	-0.783933	0.43308	0.803434
ENSG00000090273	NUDC	10643.2	-0.24835	0.193559	-1.28307	0.199467	0.642106
ENSG00000090316	MAEA	3296.63	-0.127548	0.246558	-0.517313	0.604938	0.883283
ENSG00000090339	ICAM1	6882	0.173181	0.53591	0.323152	0.74658	0.936748
ENSG00000090372	STRN4	7190.88	0.180556	0.322715	0.559492	0.575826	0.872332
ENSG00000090376	IRAK3	4028.85	0.506425	0.330237	1.53352	0.125148	0.562354
ENSG00000090382	LYZ	94770.9	0.190003	0.642881	0.295549	0.767575	0.942344
ENSG00000090402	SI	0.570628	0.94358	3.02583	0.311842	0.755161	NA
ENSG00000090432	MUL1	4294.38	0.220502	0.231591	0.952116	0.341038	0.753213
ENSG00000090447	TFAP4	77.6524	-0.690683	0.528297	-1.30738	0.191085	0.633014
ENSG00000090470	PDCD7	1982.33	-0.321879	0.347955	-0.925059	0.354935	0.763293
ENSG00000090487	SPG21	9081.36	0.0379401	0.281655	0.134704	0.892846	0.977231
ENSG00000090512	FETUB	0.292721	-0.0308939	3.04038	-0.0101612	0.991893	NA
ENSG00000090520	DNAJB11	3410.25	0.347504	0.296699	1.17123	0.241506	0.677287
ENSG00000090530	P3H2	219.728	-1.38223	0.850034	-1.62609	0.103931	0.532621
ENSG00000090534	THPO	2.24887	-0.0978009	3.03756	-0.0321972	0.974315	NA
ENSG00000090539	CHRD	0.459892	0.313274	3.01916	0.103762	0.917358	NA
ENSG00000090554	FLT3LG	1.60895	0.964492	2.71285	0.355527	0.722194	NA
ENSG00000090565	RAB11FIP3	1317.25	-0.282908	0.398012	-0.710802	0.477207	0.827694
ENSG00000090581	GNPTG	4036.86	-0.05041	0.248352	-0.202978	0.839152	0.963369
ENSG00000090612	ZNF268	1184.14	-0.481472	0.382387	-1.25912	0.207986	0.648694
ENSG00000090615	GOLGA3	1209.72	-0.0592106	0.19996	-0.296113	0.767144	0.942173
ENSG00000090621	PABPC4	2590.56	0.226112	0.309358	0.730905	0.464837	0.819783
ENSG00000090659	CD209	98.1401	-4.60811	1.0908	-4.22453	2.39e-05	0.00693757
ENSG00000090661	CERS4	505.62	-0.450538	0.312236	-1.44294	0.149037	0.593973
ENSG00000090674	MCOLN1	3467.49	-0.460988	0.383536	-1.20194	0.229386	0.666862
ENSG00000090686	USP48	4508.22	-0.622243	0.294597	-2.11218	0.0346708	0.388254
ENSG00000090776	EFNB1	1724.99	0.372447	0.575867	0.646759	0.517788	0.847921
ENSG00000090857	PDPR	784.207	-0.382034	0.270775	-1.41089	0.158277	0.60341
ENSG00000090861	AARS	3962.77	-0.902659	0.434039	-2.07967	0.0375555	0.397868
ENSG00000090863	GLG1	7420.45	-0.204188	0.221128	-0.923393	0.355803	0.764102
ENSG00000090889	KIF4A	662.472	-0.950573	0.457761	-2.07657	0.0378414	0.398668
ENSG00000090905	TNRC6A	338.655	0.22431	0.298688	0.750985	0.452662	0.811862
ENSG00000090924	PLEKHG2	733.71	-0.0329246	0.383896	-0.0857643	0.931654	0.985113
ENSG00000090932	DLL3	21.4328	-1.74671	1.11864	-1.56146	0.118415	0.551611
ENSG00000090971	NAT14	869.045	0.0346506	0.234186	0.147962	0.882373	0.974976
ENSG00000090975	PITPNM2	515.339	0.607496	0.427522	1.42097	0.155326	0.600747
ENSG00000090989	EXOC1	1773.2	-0.0784699	0.274209	-0.286168	0.77475	0.944646
ENSG00000091009	RBM27	263.448	0.108188	0.337903	0.320176	0.748835	0.937111
ENSG00000091010	POU4F3	1.45698	1.28441	3.02893	0.424046	0.671532	NA
ENSG00000091039	OSBPL8	4594.98	0.0222423	0.254183	0.0875052	0.93027	0.98453
ENSG00000091073	DTX2	606.162	0.308763	0.407056	0.758526	0.448136	0.809446
ENSG00000091106	NLRC4	114.388	-1.42818	0.701466	-2.036	0.0417505	0.413562
ENSG00000091127	PUS7	1586.52	-1.08237	0.318871	-3.39437	0.00068787	0.0631658
ENSG00000091128	LAMB4	4.93851	3.13404	2.54395	1.23196	0.217965	NA
ENSG00000091129	NRCAM	6.02793	0.755862	2.97462	0.254103	0.799416	NA
ENSG00000091136	LAMB1	140.958	0.457866	0.589979	0.776073	0.437706	0.804337
ENSG00000091137	SLC26A4	7.55518	0.961766	2.99309	0.321328	0.747962	0.937056
ENSG00000091138	SLC26A3	1.0498	-0.331003	3.0126	-0.109873	0.91251	NA
ENSG00000091140	DLD	10193.7	-0.129602	0.239503	-0.54113	0.588418	0.876216
ENSG00000091157	WDR7	589.795	-0.921305	0.587527	-1.56811	0.116856	0.549293
ENSG00000091164	TXNL1	6456.96	0.38246	0.233829	1.63564	0.101915	0.53081
ENSG00000091181	IL5RA	63.8938	-2.03035	0.889719	-2.28201	0.0224885	0.339219
ENSG00000091262	ABCC6	209.626	0.0602539	0.537414	0.112118	0.91073	0.979965
ENSG00000091317	CMTM6	15175.6	0.268966	0.299346	0.898512	0.368913	0.771578
ENSG00000091409	ITGA6	1765.85	-0.303916	0.300951	-1.00985	0.312566	0.734702
ENSG00000091428	RAPGEF4	138.451	0.794247	0.826105	0.961436	0.336333	0.751901
ENSG00000091436	MAP3K20	2672.19	0.0656784	0.240414	0.273189	0.784708	0.946404
ENSG00000091482	SMPX	0.347168	0.433316	3.03051	0.142985	0.886302	NA
ENSG00000091483	FH	3451.36	-0.360111	0.272259	-1.32268	0.185941	0.629228
ENSG00000091490	SEL1L3	2765.72	-0.316017	0.385097	-0.820617	0.411864	0.794622
ENSG00000091513	TF	233.173	-1.70574	0.881531	-1.93498	0.0529931	0.444971
ENSG00000091527	CDV3	7919.64	0.171511	0.342657	0.500531	0.616701	0.886542
ENSG00000091536	MYO15A	39.8367	0.260679	0.991728	0.262854	0.792663	0.949527
ENSG00000091542	ALKBH5	8475.15	0.0778382	0.245028	0.31767	0.750735	0.937707
ENSG00000091583	APOH	0	NA	NA	NA	NA	NA
ENSG00000091592	NLRP1	1505.57	0.426235	0.318697	1.33743	0.181083	0.625238
ENSG00000091622	PITPNM3	9.98953	-3.47656	1.90576	-1.82424	0.0681163	0.481703
ENSG00000091640	SPAG7	3937.84	0.0289645	0.191069	0.151592	0.879508	0.974114
ENSG00000091651	ORC6	960.184	-0.334424	0.375092	-0.891579	0.372618	0.77296
ENSG00000091656	ZFHX4	3.39975	-0.163197	2.99994	-0.0544002	0.956616	NA
ENSG00000091664	SLC17A6	0.0836344	-0.0127052	3.04891	-0.00416712	0.996675	NA
ENSG00000091704	CPA1	0.099091	-0.0730945	3.05136	-0.0239547	0.980889	NA
ENSG00000091732	ZC3HC1	1063.93	-0.431259	0.342419	-1.25945	0.207869	0.648694
ENSG00000091831	ESR1	93.8299	-0.192679	0.716969	-0.268741	0.788129	0.947537
ENSG00000091844	RGS17	12.1419	-2.63113	1.72657	-1.5239	0.127533	0.565213
ENSG00000091879	ANGPT2	462.731	-1.91428	0.702337	-2.72558	0.00641883	0.203335
ENSG00000091947	TMEM101	897.93	-0.711508	0.405098	-1.75638	0.0790229	0.495717
ENSG00000091972	CD200	1183.37	1.11079	0.353956	3.13821	0.00169985	0.106454
ENSG00000091986	CCDC80	127.436	0.448542	0.695156	0.64524	0.518772	0.847921
ENSG00000092009	CMA1	1.73183	-0.365872	3.00229	-0.121864	0.903006	NA
ENSG00000092010	PSME1	18313.3	0.107054	0.26438	0.404926	0.685532	0.91351
ENSG00000092020	PPP2R3C	2166.79	0.3051	0.229513	1.32934	0.183737	0.627495
ENSG00000092036	HAUS4	954.655	-0.0946461	0.305315	-0.309995	0.756565	0.939474
ENSG00000092051	JPH4	274.031	0.696067	0.765304	0.90953	0.363071	0.767758
ENSG00000092054	MYH7	1.23812	0.438048	3.01975	0.145061	0.884663	NA
ENSG00000092067	CEBPE	502.274	-0.302182	0.854997	-0.35343	0.723766	0.928712
ENSG00000092068	SLC7A8	832.782	0.132286	0.6711	0.197118	0.843735	0.965011
ENSG00000092094	OSGEP	2585.67	-0.574491	0.316104	-1.81741	0.0691543	0.482123
ENSG00000092096	SLC22A17	548.545	-0.397175	0.30162	-1.31681	0.187903	0.631244
ENSG00000092098	RNF31	916.633	0.243144	0.317347	0.766177	0.443571	0.806978
ENSG00000092108	SCFD1	3987.45	0.118868	0.19137	0.621141	0.534507	0.855833
ENSG00000092140	G2E3	1019.44	0.628206	0.383861	1.63654	0.101726	0.53081
ENSG00000092148	HECTD1	3502.04	0.440719	0.29686	1.4846	0.137649	0.577405
ENSG00000092199	HNRNPC	56193.2	0.204431	0.266924	0.765878	0.443749	0.80707
ENSG00000092200	RPGRIP1	27.0133	-0.695746	0.570896	-1.21869	0.222962	0.661066
ENSG00000092201	SUPT16H	8723.49	-0.399328	0.241103	-1.65626	0.0976698	0.524628
ENSG00000092203	TOX4	4255.66	0.361282	0.203898	1.77187	0.0764157	0.49266
ENSG00000092208	GEMIN2	716.285	-0.0562942	0.365736	-0.15392	0.877673	0.973777
ENSG00000092295	TGM1	2.94905	0.29934	3.01176	0.0993904	0.920828	NA
ENSG00000092330	TINF2	4443.18	-0.0431927	0.166333	-0.259676	0.795114	0.950351
ENSG00000092345	DAZL	1.70126	0.352622	3.02233	0.116672	0.90712	NA
ENSG00000092377	TBL1Y	111.303	-0.778615	2.09291	-0.372026	0.709873	0.922678
ENSG00000092421	SEMA6A	343.791	0.302688	0.535853	0.564871	0.572161	0.871312
ENSG00000092439	TRPM7	1752.97	0.313704	0.221856	1.414	0.157362	0.60205
ENSG00000092445	TYRO3	176.482	-0.837623	0.744597	-1.12493	0.260617	0.693511
ENSG00000092470	WDR76	1176.61	-0.513442	0.364562	-1.40838	0.159019	0.603921
ENSG00000092529	CAPN3	13.4016	-1.38233	0.912652	-1.51463	0.129865	0.569016
ENSG00000092531	SNAP23	3538.06	-0.0356963	0.32043	-0.111401	0.911298	0.979965
ENSG00000092607	TBX15	5.18893	2.00982	2.98781	0.672673	0.501155	NA
ENSG00000092621	PHGDH	5807.13	-0.712341	0.487135	-1.46231	0.143657	0.58791
ENSG00000092758	COL9A3	85.9613	0.331234	0.945612	0.350285	0.726124	0.930029
ENSG00000092820	EZR	15523.8	-0.208502	0.300644	-0.693518	0.487984	0.832986
ENSG00000092841	MYL6	33290.1	0.443269	0.245055	1.80885	0.0704737	0.48494
ENSG00000092847	AGO1	1752.82	0.00852652	0.198376	0.0429816	0.965716	0.991762
ENSG00000092850	TEKT2	54.8105	0.33585	0.715356	0.469487	0.638722	0.896876
ENSG00000092853	CLSPN	718.643	-0.344167	0.209172	-1.64538	0.0998914	0.527527
ENSG00000092871	RFFL	1127.83	0.142322	0.186138	0.764607	0.444506	0.807318
ENSG00000092929	UNC13D	11199.1	-0.702715	0.240279	-2.92458	0.00344924	0.153874
ENSG00000092931	MFSD11	969.253	-0.200222	0.244392	-0.819265	0.412635	0.795579
ENSG00000092964	DPYSL2	2908.53	-0.667539	0.473487	-1.40984	0.158588	0.603763
ENSG00000092969	TGFB2	13.3686	2.69166	2.17247	1.23898	0.215352	0.654914
ENSG00000092978	GPATCH2	407.467	0.156403	0.21985	0.711409	0.476831	0.827306
ENSG00000093000	NUP50	3572.77	0.0259674	0.184573	0.140689	0.888116	0.97598
ENSG00000093009	CDC45	2124.09	-0.621726	0.40433	-1.53767	0.124129	0.561285
ENSG00000093010	COMT	11879.7	-0.187064	0.214152	-0.87351	0.382385	0.780172
ENSG00000093072	ADA2	8084.98	-0.243807	0.56639	-0.430457	0.666863	0.907077
ENSG00000093100	AC016026.1	1.70018	1.16543	3.00871	0.387352	0.698496	NA
ENSG00000093134	VNN3	84.717	-3.73819	1.14876	-3.2541	0.00113752	0.086735
ENSG00000093144	ECHDC1	2939.84	-0.271817	0.294658	-0.922482	0.356277	0.764653
[truncated: 56,397 more rows]
