# Supplementary material for: Molecular profiling of pre- and post- 5-azacytidine myelodysplastic syndrome samples identifies predictors of response
Source: Front Oncol. 2024 Sep 23;14:1438052. doi: 10.3389/fonc.2024.1438052 (PMC11456566; doi:10.3389/fonc.2024.1438052)
Supplement: Supplementary Table 9 — List of genes differentially expressed between pre- and post-treatment hematological non-responders (HEM-NR). [file Table9.xlsx]

## Sheet: Sheet1
Supplementary Table 9. List of genes differentially expressed between pre and post-treatment hematological non-responders
ENSG	Gene	baseMean	log2FoldChange_HEM-NR_pre_vs_post	lfcSE	stat	pvalue	padj
ENSG00000000003	TSPAN6	294.023	-5.45956	0.801684	-6.81011	9.75e-12	9.66e-09
ENSG00000000005	TNMD	10.6042	-1.14976	3.36295	-0.341891	0.732433	NA
ENSG00000000419	DPM1	5041.09	0.241922	0.42898	0.563947	0.57279	0.876808
ENSG00000000457	SCYL3	738.229	0.452909	0.565399	0.801043	0.423107	0.797742
ENSG00000000460	C1orf112	489.42	-0.382042	0.457328	-0.835377	0.403505	0.785952
ENSG00000000938	FGR	1771.66	-2.93893	0.822442	-3.57342	0.000352346	0.0105078
ENSG00000000971	CFH	2144.09	-3.3318	0.830676	-4.01095	6.05e-05	0.00271547
ENSG00000001036	FUCA2	1925.4	-1.0005	0.511686	-1.9553	0.0505479	0.300947
ENSG00000001084	GCLC	1600.61	-0.521397	0.488335	-1.0677	0.285654	0.696963
ENSG00000001167	NFYA	1415.64	-0.0839634	0.413512	-0.203049	0.839096	0.962736
ENSG00000001460	STPG1	255.376	-0.496336	0.590783	-0.840133	0.400834	0.784529
ENSG00000001461	NIPAL3	1302.54	-0.275241	0.349106	-0.788416	0.430453	0.80192
ENSG00000001497	LAS1L	2745.67	-0.237102	0.38929	-0.609063	0.542483	0.865126
ENSG00000001561	ENPP4	1947.55	-0.0174958	0.431098	-0.0405843	0.967627	0.993835
ENSG00000001617	SEMA3F	275.011	-2.3037	0.791885	-2.90914	0.00362423	0.0559738
ENSG00000001626	CFTR	4.25441	-3.02497	3.42246	-0.88386	0.376772	NA
ENSG00000001629	ANKIB1	415.127	-0.63814	0.646089	-0.987697	0.323301	0.731824
ENSG00000001630	CYP51A1	127.19	-0.0632207	0.497429	-0.127095	0.898865	0.978104
ENSG00000001631	KRIT1	636.015	0.0201653	0.592522	0.0340329	0.972851	0.994002
ENSG00000002016	RAD52	250.931	-0.838056	0.653371	-1.28266	0.19961	0.610192
ENSG00000002079	MYH16	0.617941	1.26567	3.49338	0.362306	0.717124	NA
ENSG00000002330	BAD	761.304	0.199833	0.428468	0.46639	0.640937	0.903654
ENSG00000002549	LAP3	8130.26	-0.945042	0.535592	-1.76448	0.0776509	0.382526
ENSG00000002586	CD99	33392	0.719554	0.395724	1.81832	0.0690145	0.357849
ENSG00000002587	HS3ST1	1620.91	-0.581932	0.748154	-0.777825	0.436672	0.805151
ENSG00000002726	AOC1	133.609	-7.93506	2.66378	-2.97887	0.00289317	0.0476423
ENSG00000002745	WNT16	0	NA	NA	NA	NA	NA
ENSG00000002746	HECW1	2.56777	0.862041	3.45414	0.249567	0.802922	NA
ENSG00000002822	MAD1L1	1407.6	-0.688984	0.37779	-1.82372	0.0681939	0.355575
ENSG00000002834	LASP1	4976.03	-0.175079	0.363919	-0.481094	0.63045	0.900481
ENSG00000002919	SNX11	1448.08	-0.413126	0.421737	-0.979582	0.327292	0.735595
ENSG00000002933	TMEM176A	1159.9	-1.23672	0.893031	-1.38486	0.166095	0.566059
ENSG00000003056	M6PR	5528.48	-0.0953072	0.366624	-0.259959	0.794896	0.952908
ENSG00000003096	KLHL13	427.881	0.495509	0.738431	0.671031	0.502201	0.843262
ENSG00000003137	CYP26B1	23.5611	-4.79798	2.89954	-1.65474	0.0979782	0.433459
ENSG00000003147	ICA1	1445.39	-0.00442052	0.348493	-0.0126847	0.989879	0.999035
ENSG00000003249	DBNDD1	145.965	1.53447	1.42406	1.07753	0.281243	0.693286
ENSG00000003393	ALS2	3045.7	0.760726	0.394783	1.92695	0.0539862	0.313845
ENSG00000003400	CASP10	1282.67	-0.412528	0.597076	-0.690913	0.48962	0.836681
ENSG00000003402	CFLAR	4958.54	-0.450139	0.492216	-0.914516	0.360446	0.759379
ENSG00000003436	TFPI	17682.6	0.324835	0.559795	0.580275	0.561729	0.87278
ENSG00000003509	NDUFAF7	604.827	0.46778	0.416101	1.1242	0.260929	0.673828
ENSG00000003756	RBM5	2438.95	0.18213	0.417868	0.435855	0.662942	0.91189
ENSG00000003987	MTMR7	35.5457	1.05384	0.890178	1.18385	0.236471	0.648939
ENSG00000003989	SLC7A2	113.891	-4.98159	1.59537	-3.12254	0.00179298	0.0338399
ENSG00000004059	ARF5	5717.6	0.39527	0.356657	1.10826	0.267749	0.68
ENSG00000004139	SARM1	205.904	-0.405114	0.739756	-0.547632	0.583945	0.881245
ENSG00000004142	POLDIP2	6897.84	0.104073	0.320469	0.324753	0.745368	0.939335
ENSG00000004399	PLXND1	3759.05	-0.51768	0.434411	-1.19168	0.233385	0.646334
ENSG00000004455	AK2	8524.43	-0.330406	0.407115	-0.811579	0.417033	0.793971
ENSG00000004468	CD38	2870.48	-1.50885	0.564117	-2.67471	0.00747937	0.0917636
ENSG00000004478	FKBP4	3052.2	-0.457423	0.490752	-0.932086	0.351292	0.754111
ENSG00000004487	KDM1A	6168.22	0.121033	0.40675	0.297562	0.766038	0.944408
ENSG00000004534	RBM6	1682.6	-0.49934	0.401697	-1.24308	0.21384	0.623999
ENSG00000004660	CAMKK1	150.355	-1.19412	0.658863	-1.8124	0.069924	0.360795
ENSG00000004700	RECQL	936.593	-0.810773	0.452215	-1.79289	0.0729899	0.369276
ENSG00000004766	VPS50	453.909	-0.564054	0.65193	-0.865206	0.386926	0.777287
ENSG00000004776	HSPB6	34.8364	-1.50965	1.02619	-1.47113	0.141257	0.525388
ENSG00000004777	ARHGAP33	109.558	0.389154	0.850061	0.457795	0.647099	0.906346
ENSG00000004779	NDUFAB1	3774.17	0.0845224	0.460669	0.183477	0.854423	0.96621
ENSG00000004799	PDK4	1187.64	-1.66127	1.1138	-1.49152	0.135824	0.514065
ENSG00000004809	SLC22A16	1153.23	-0.0309198	0.470691	-0.0656901	0.947625	0.990544
ENSG00000004838	ZMYND10	19.4924	-3.1596	1.52349	-2.07392	0.0380866	0.252257
ENSG00000004846	ABCB5	0.256777	0.756717	3.49745	0.216362	0.828705	NA
ENSG00000004848	ARX	23.004	-4.11696	2.86324	-1.43787	0.150471	0.53976
ENSG00000004864	SLC25A13	823.798	-0.0992121	0.36325	-0.273123	0.784758	0.950533
ENSG00000004866	ST7	2154.65	0.0160562	0.358044	0.0448443	0.964231	0.993773
ENSG00000004897	CDC27	3017.09	-0.134557	0.529472	-0.254134	0.799392	0.953468
ENSG00000004939	SLC4A1	3495.09	-2.95798	0.854865	-3.46018	0.000539822	0.0142718
ENSG00000004948	CALCR	1.53643	0.127316	3.40143	0.0374302	0.970142	NA
ENSG00000004961	HCCS	1876.27	0.0506473	0.418747	0.12095	0.903731	0.979102
ENSG00000004975	DVL2	2728.97	-0.000747382	0.419023	-0.00178363	0.998577	0.99979
ENSG00000005001	PRSS22	0	NA	NA	NA	NA	NA
ENSG00000005007	UPF1	3837.34	0.0211013	0.438688	0.0481009	0.961636	0.99345
ENSG00000005020	SKAP2	3171.62	-0.909276	0.383722	-2.36962	0.0178062	0.16124
ENSG00000005022	SLC25A5	16487.9	0.388293	0.479531	0.809735	0.418093	0.794613
ENSG00000005059	MCUB	3279.97	0.228293	0.409535	0.557444	0.577224	0.878502
ENSG00000005073	HOXA11	7.72355	-3.92619	2.31003	-1.69963	0.0892005	NA
ENSG00000005075	POLR2J	1479.51	0.0101906	0.36476	0.0279379	0.977712	0.994513
ENSG00000005100	DHX33	245.024	-0.0191234	0.601941	-0.0317695	0.974656	0.994248
ENSG00000005102	MEOX1	1.32587	-1.2051	3.46169	-0.348126	0.727745	NA
ENSG00000005108	THSD7A	274.059	-0.114934	1.03466	-0.111085	0.911549	0.981325
ENSG00000005156	LIG3	1119.82	-0.125314	0.611775	-0.204836	0.8377	0.962505
ENSG00000005175	RPAP3	1564.1	-0.0339671	0.360447	-0.0942362	0.924922	0.984851
ENSG00000005187	ACSM3	553.844	0.129371	0.61346	0.210887	0.832975	0.961895
ENSG00000005189	REXO5	1216.58	0.702071	0.418039	1.67944	0.0930661	0.420752
ENSG00000005194	CIAPIN1	3979.57	0.311502	0.361085	0.862685	0.388311	0.77745
ENSG00000005206	SPPL2B	1969.57	0.313304	0.496083	0.631556	0.527677	0.85831
ENSG00000005238	FAM214B	1233.04	-0.917383	0.56453	-1.62504	0.104154	0.447292
ENSG00000005243	COPZ2	296.975	-3.13969	2.50125	-1.25525	0.209388	0.620751
ENSG00000005249	PRKAR2B	5292.34	-0.615081	0.862405	-0.713216	0.475712	0.827703
ENSG00000005302	MSL3	1131.48	-0.662704	0.446914	-1.48284	0.138116	0.51838
ENSG00000005339	CREBBP	2979.56	0.408532	0.431512	0.946745	0.343769	0.747727
ENSG00000005379	TSPOAP1	3016.54	0.995871	0.863491	1.15331	0.248784	0.662116
ENSG00000005381	MPO	401527	-0.81842	0.568007	-1.44086	0.149624	0.538668
ENSG00000005421	PON1	1.64784	1.35531	3.46771	0.390837	0.695918	NA
ENSG00000005436	GCFC2	1336.82	0.259402	0.429048	0.604599	0.545445	0.866118
ENSG00000005448	WDR54	903.803	-0.235791	0.622701	-0.378659	0.704941	0.926786
ENSG00000005469	CROT	253.892	-0.120714	0.48635	-0.248204	0.803977	0.954192
ENSG00000005471	ABCB4	21.4029	0.319034	1.05703	0.301822	0.762788	0.943821
ENSG00000005483	KMT2E	17158.1	0.699205	0.400004	1.74799	0.0804651	0.388437
ENSG00000005486	RHBDD2	7164.25	0.363623	0.492518	0.738294	0.460336	0.819471
ENSG00000005513	SOX8	163.549	1.46254	1.19913	1.21967	0.22259	0.632748
ENSG00000005700	IBTK	1574.43	0.304109	0.40258	0.7554	0.450009	0.813322
ENSG00000005801	ZNF195	2754.35	0.72272	0.467998	1.54428	0.12252	0.487764
ENSG00000005810	MYCBP2	1710.05	-0.0362343	0.57052	-0.0635111	0.94936	0.99092
ENSG00000005812	FBXL3	5763.19	0.149179	0.386611	0.385864	0.699597	0.925157
ENSG00000005844	ITGAL	1675.38	-0.780118	0.561559	-1.3892	0.164772	0.564208
ENSG00000005882	PDK2	1174.93	0.128407	0.369216	0.347784	0.728002	0.932557
ENSG00000005884	ITGA3	166.63	0.513147	0.880476	0.582806	0.560024	0.87155
ENSG00000005889	ZFX	2341.12	0.162751	0.456646	0.356406	0.721536	0.931478
ENSG00000005893	LAMP2	17977.4	-0.0952428	0.358231	-0.265869	0.79034	0.952078
ENSG00000005961	ITGA2B	9098.19	-2.09797	0.818496	-2.5632	0.0103713	0.113028
ENSG00000005981	ASB4	0.256777	0.756717	3.49745	0.216362	0.828705	NA
ENSG00000006007	GDE1	6004.76	0.753792	0.436453	1.72709	0.0841518	0.398972
ENSG00000006015	REX1BD	3108.65	-0.149618	0.454937	-0.328877	0.742248	0.938786
ENSG00000006016	CRLF1	4.81254	1.26081	2.79484	0.451122	0.651901	NA
ENSG00000006025	OSBPL7	448.173	-0.446598	0.450605	-0.991106	0.321634	0.730305
ENSG00000006042	TMEM98	912.727	-1.51283	0.577172	-2.62111	0.0087643	0.101538
ENSG00000006047	YBX2	13.3558	-3.70082	1.70211	-2.17425	0.0296861	0.217801
ENSG00000006059	KRT33A	0	NA	NA	NA	NA	NA
ENSG00000006062	MAP3K14	1367.51	-0.353732	0.431184	-0.820373	0.412003	0.790617
ENSG00000006071	ABCC8	36.9678	-2.04236	2.06911	-0.987072	0.323607	0.731849
ENSG00000006116	CACNG3	0	NA	NA	NA	NA	NA
ENSG00000006118	TMEM132A	79.5662	-3.11676	1.78405	-1.74702	0.0806343	0.388894
ENSG00000006125	AP2B1	4695.57	0.00463583	0.415573	0.0111553	0.9911	0.999035
ENSG00000006128	TAC1	1.54066	0.852889	3.45771	0.246663	0.805169	NA
ENSG00000006194	ZNF263	3301.46	0.251486	0.457766	0.549377	0.582747	0.880747
ENSG00000006210	CX3CL1	130.398	-4.04834	1.57628	-2.56829	0.0102201	0.112121
ENSG00000006282	SPATA20	2015.77	-0.370403	0.368401	-1.00543	0.314688	0.724619
ENSG00000006283	CACNA1G	0.642482	2.03002	3.4755	0.584093	0.559158	NA
ENSG00000006327	TNFRSF12A	2590.28	0.194718	0.659788	0.295123	0.7679	0.944886
ENSG00000006377	DLX6	2.65502	-2.38192	3.43634	-0.693157	0.488211	NA
ENSG00000006432	MAP3K9	131.211	-0.779224	0.97336	-0.800551	0.423392	0.797742
ENSG00000006451	RALA	5665.41	0.369022	0.389182	0.948201	0.343027	0.746649
ENSG00000006453	BAIAP2L1	66.9038	-1.93698	1.19612	-1.61939	0.105364	0.449585
ENSG00000006459	KDM7A	884.091	-0.694106	0.454842	-1.52604	0.127001	0.497304
ENSG00000006468	ETV1	12.327	-2.89141	2.22201	-1.30126	0.193169	0.603744
ENSG00000006530	AGK	1485.1	0.215831	0.407384	0.529798	0.596252	0.887241
ENSG00000006534	ALDH3B1	2325.71	-0.903463	0.479746	-1.88321	0.0596719	0.332758
ENSG00000006555	TTC22	95.5006	-0.424882	0.489222	-0.868485	0.385129	0.776137
ENSG00000006576	PHTF2	1203.82	-0.0126629	0.440766	-0.0287293	0.97708	0.994405
ENSG00000006606	CCL26	3.55151	-3.31693	3.40338	-0.974599	0.329759	NA
ENSG00000006607	FARP2	927.198	-0.495066	0.433679	-1.14155	0.253642	0.666571
ENSG00000006611	USH1C	0	NA	NA	NA	NA	NA
ENSG00000006625	GGCT	426.704	0.0319291	0.443802	0.0719443	0.942646	0.98976
ENSG00000006634	DBF4	2032.97	0.0580418	0.596419	0.0973172	0.922475	0.984491
ENSG00000006638	TBXA2R	803.306	-1.48535	0.500894	-2.9654	0.00302294	0.0489952
ENSG00000006652	IFRD1	3568.8	0.438393	0.41686	1.05166	0.292957	0.7022
ENSG00000006659	LGALS14	0	NA	NA	NA	NA	NA
ENSG00000006695	COX10	1020.19	-0.309848	0.403476	-0.767947	0.442519	0.809045
ENSG00000006704	GTF2IRD1	48.4262	-1.02388	1.26294	-0.81071	0.417532	0.79451
ENSG00000006712	PAF1	3132.27	0.0972423	0.321141	0.302802	0.762041	0.943821
ENSG00000006715	VPS41	2225.12	-0.14096	0.370875	-0.380073	0.703891	0.926266
ENSG00000006740	ARHGAP44	132.155	-1.51968	1.12814	-1.34706	0.177959	0.583347
ENSG00000006744	ELAC2	2931.1	-0.564068	0.431745	-1.30648	0.191389	0.602046
ENSG00000006747	SCIN	70.1508	-3.63673	1.1494	-3.16401	0.00155609	0.0308123
ENSG00000006756	ARSD	1186.26	0.0753728	0.358197	0.210423	0.833338	0.96194
ENSG00000006757	PNPLA4	509.829	-0.605584	0.492638	-1.22927	0.218971	0.62975
ENSG00000006788	MYH13	1.47324	-1.83377	3.43049	-0.534551	0.59296	NA
ENSG00000006831	ADIPOR2	503.202	0.394974	0.517889	0.762662	0.445665	0.811377
ENSG00000006837	CDKL3	13.7173	-0.360969	1.04288	-0.346128	0.729247	0.932611
ENSG00000007001	UPP2	1.27606	-0.470265	3.38755	-0.138821	0.889591	NA
ENSG00000007038	PRSS21	65.3092	-0.755598	0.935231	-0.807926	0.419133	0.795049
ENSG00000007047	MARK4	445.704	0.864915	0.368459	2.34738	0.0189057	0.167279
ENSG00000007062	PROM1	5505.04	0.772428	0.771925	1.00065	0.316996	0.726606
ENSG00000007080	CCDC124	2226.83	-0.401078	0.327994	-1.22282	0.221397	0.631533
ENSG00000007129	CEACAM21	513.525	-0.379713	0.430774	-0.881467	0.378065	0.770607
ENSG00000007168	PAFAH1B1	1855.63	0.135602	0.414993	0.326757	0.743852	0.938944
ENSG00000007171	NOS2	4.42857	-0.441974	3.40041	-0.129977	0.896585	NA
ENSG00000007174	DNAH9	1.10489	-1.19745	3.46415	-0.345668	0.729592	NA
ENSG00000007202	KIAA0100	2491.69	-0.102129	0.437468	-0.233455	0.815408	0.957793
ENSG00000007216	SLC13A2	0	NA	NA	NA	NA	NA
ENSG00000007237	GAS7	737.062	-2.00017	0.615459	-3.24989	0.0011545	0.0247418
ENSG00000007255	TRAPPC6A	2441.63	0.0699574	0.58496	0.119593	0.904805	0.979226
ENSG00000007264	MATK	2491.29	0.594461	0.537281	1.10642	0.268543	0.680884
ENSG00000007306	CEACAM7	0	NA	NA	NA	NA	NA
ENSG00000007312	CD79B	1053.39	-1.06228	0.624634	-1.70064	0.0890113	0.410069
ENSG00000007314	SCN4A	23.9402	-5.50073	1.52272	-3.61244	0.00030333	0.00928369
ENSG00000007341	ST7L	578.957	0.450579	0.406815	1.10758	0.268044	0.680315
ENSG00000007350	TKTL1	173.653	-0.150535	0.883615	-0.170362	0.864725	0.969311
ENSG00000007372	PAX6	0.436502	0.959994	3.4825	0.275662	0.782808	NA
ENSG00000007376	RPUSD1	2082.42	-0.788314	0.458219	-1.72039	0.085362	0.40141
ENSG00000007384	RHBDF1	550.881	-0.236763	0.581536	-0.407134	0.683909	0.91967
ENSG00000007392	LUC7L	2176.9	0.646726	0.387854	1.66745	0.0954257	0.427226
ENSG00000007402	CACNA2D2	41.1607	0.826345	1.04618	0.789873	0.429602	0.800959
ENSG00000007516	BAIAP3	228.234	-1.71087	1.09747	-1.55892	0.119015	0.477502
ENSG00000007520	TSR3	2162.5	-0.934766	0.398885	-2.34345	0.0191064	0.168195
ENSG00000007541	PIGQ	1399.61	-0.695666	0.5017	-1.38662	0.165558	0.565335
ENSG00000007545	CRAMP1	562.32	0.610616	0.626534	0.974594	0.329762	0.737346
ENSG00000007866	TEAD3	111.063	-0.0313483	0.731176	-0.0428737	0.965802	0.993773
ENSG00000007908	SELE	598.552	-2.32739	0.837084	-2.78036	0.00542989	0.0741535
ENSG00000007923	DNAJC11	970.122	-0.236301	0.405626	-0.582559	0.56019	0.871739
ENSG00000007933	FMO3	692.722	-6.13374	1.25695	-4.87985	1.06e-06	0.000125135
ENSG00000007944	MYLIP	2411.64	0.279649	0.491274	0.569232	0.569198	0.87537
ENSG00000007952	NOX1	1.87558	-0.803337	3.45582	-0.232459	0.816182	NA
ENSG00000007968	E2F2	849.401	-0.750752	0.59218	-1.26778	0.204878	0.615069
ENSG00000008018	PSMB1	13649.5	0.320279	0.395922	0.808945	0.418547	0.795031
ENSG00000008056	SYN1	538.131	-0.478167	1.02839	-0.464968	0.641954	0.904188
ENSG00000008083	JARID2	7095.29	0.401556	0.49306	0.814415	0.415407	0.79335
ENSG00000008086	CDKL5	112.378	-0.154515	1.03998	-0.148575	0.881889	0.973395
ENSG00000008118	CAMK1G	9.83936	-0.87574	3.45071	-0.253786	0.799661	NA
ENSG00000008128	CDK11A	71.1356	0.500573	0.653605	0.765864	0.443757	0.80996
ENSG00000008130	NADK	2047.2	-0.815692	0.391853	-2.08163	0.0373763	0.249313
ENSG00000008196	TFAP2B	0	NA	NA	NA	NA	NA
ENSG00000008197	TFAP2D	0.530716	-1.31238	3.48305	-0.376791	0.706329	NA
ENSG00000008226	DLEC1	23.083	-1.36198	1.56124	-0.872372	0.383006	0.774538
ENSG00000008256	CYTH3	1022.2	-0.560775	0.595932	-0.941006	0.346702	0.750023
ENSG00000008277	ADAM22	141.393	-1.21779	0.737525	-1.65119	0.0986997	0.435393
ENSG00000008282	SYPL1	11348	0.550414	0.348124	1.58109	0.113858	0.467472
ENSG00000008283	CYB561	2143.87	-0.489801	0.497072	-0.985372	0.324442	0.733066
ENSG00000008294	SPAG9	2697	-0.207364	0.422322	-0.49101	0.62342	0.898272
ENSG00000008300	CELSR3	26.3002	-2.29388	1.31607	-1.74298	0.0813371	0.391121
ENSG00000008311	AASS	229.531	-1.44284	0.926227	-1.55777	0.119289	0.478214
ENSG00000008323	PLEKHG6	64.4848	-0.501172	0.681213	-0.735706	0.46191	0.819668
ENSG00000008324	SS18L2	2438.37	0.181238	0.458549	0.395242	0.692664	0.923064
ENSG00000008382	MPND	218.129	-0.588934	0.491531	-1.19816	0.230854	0.64297
ENSG00000008394	MGST1	7804.08	0.577501	0.574614	1.00503	0.314884	0.724619
ENSG00000008405	CRY1	6224.5	0.454564	0.391434	1.16128	0.245529	0.657733
ENSG00000008438	PGLYRP1	1477.63	-3.46288	0.853437	-4.05757	4.96e-05	0.00233789
ENSG00000008441	NFIX	1041.75	-0.37155	0.513015	-0.724248	0.468914	0.823861
ENSG00000008513	ST3GAL1	9035.72	0.576762	0.539278	1.06951	0.28484	0.696257
ENSG00000008516	MMP25	97.0327	-1.81246	0.832521	-2.17707	0.0294752	0.216896
ENSG00000008517	IL32	525.158	-4.14049	1.11611	-3.70974	0.000207474	0.00710253
ENSG00000008710	PKD1	752.993	0.321046	0.369309	0.869314	0.384675	0.775696
ENSG00000008735	MAPK8IP2	0	NA	NA	NA	NA	NA
ENSG00000008838	MED24	3599.04	-0.0546766	0.381351	-0.143376	0.885993	0.973519
ENSG00000008853	RHOBTB2	283.431	-1.44308	0.781193	-1.84728	0.0647071	0.34603
ENSG00000008869	HEATR5B	1264.63	0.400877	0.608203	0.659117	0.50982	0.847435
ENSG00000008952	SEC62	5022.93	-0.232709	0.441326	-0.527295	0.597989	0.887932
ENSG00000008988	RPS20	20079.2	1.17506	0.38539	3.04902	0.00229588	0.0402988
ENSG00000009307	CSDE1	39895.2	0.546423	0.323509	1.68905	0.0912094	0.416063
ENSG00000009335	UBE3C	1864.61	0.472429	0.60742	0.777764	0.436708	0.805151
ENSG00000009413	REV3L	1505.48	-0.0537006	0.525156	-0.102257	0.918553	0.983668
ENSG00000009694	TENM1	36.8565	-0.864125	1.67631	-0.515493	0.606208	0.891216
ENSG00000009709	PAX7	0	NA	NA	NA	NA	NA
ENSG00000009724	MASP2	19.0584	-2.82004	1.9271	-1.46336	0.14337	0.529074
ENSG00000009765	IYD	1.54066	0.852889	3.45771	0.246663	0.805169	NA
ENSG00000009780	FAM76A	432.236	-0.489563	0.444418	-1.10158	0.270643	0.682682
ENSG00000009790	TRAF3IP3	926.332	-0.712288	0.464048	-1.53495	0.124797	0.493031
ENSG00000009830	POMT2	225.887	-1.4144	0.600767	-2.35432	0.0185564	0.165398
ENSG00000009844	VTA1	4520.22	0.0932109	0.383947	0.24277	0.808184	0.955512
ENSG00000009950	MLXIPL	0.88391	-1.18633	3.46776	-0.342104	0.732273	NA
ENSG00000009954	BAZ1B	2749.59	-0.151059	0.454073	-0.332676	0.739379	0.937423
ENSG00000010017	RANBP9	1421.46	0.373074	0.347445	1.07377	0.282928	0.694227
ENSG00000010030	ETV7	177.56	-4.2553	1.40139	-3.03648	0.00239358	0.0414497
ENSG00000010072	SPRTN	1335.99	0.425219	0.35814	1.1873	0.235109	0.647576
ENSG00000010165	METTL13	1409.36	-0.88075	0.516934	-1.70379	0.0884194	0.408504
ENSG00000010219	DYRK4	387.3	0.0140393	0.399049	0.035182	0.971935	0.993901
ENSG00000010244	ZNF207	17776	0.408393	0.385828	1.05848	0.289835	0.700521
ENSG00000010256	UQCRC1	8441.01	-0.743478	0.443208	-1.67749	0.0934458	0.421219
ENSG00000010270	STARD3NL	8763.24	0.693482	0.375805	1.84533	0.06499	0.347069
ENSG00000010278	CD9	4826.31	-1.76569	0.707941	-2.49412	0.0126269	0.128224
ENSG00000010282	HHATL	0	NA	NA	NA	NA	NA
ENSG00000010292	NCAPD2	1872.8	-0.75773	0.445759	-1.69986	0.0891567	0.4101
ENSG00000010295	IFFO1	885.751	-0.914553	0.345009	-2.65081	0.00802989	0.0960192
ENSG00000010310	GIPR	20.8803	-1.58112	1.81214	-0.872515	0.382927	0.774459
ENSG00000010318	PHF7	731.672	-0.168279	0.420036	-0.400629	0.688693	0.920848
ENSG00000010319	SEMA3G	402.054	-1.33562	1.22936	-1.08643	0.277288	0.689091
ENSG00000010322	NISCH	2989.15	-0.206329	0.411844	-0.500987	0.61638	0.894844
ENSG00000010327	STAB1	2674.54	-1.2692	0.589266	-2.15387	0.0312506	0.224537
ENSG00000010361	FUZ	388.008	-0.185478	0.453301	-0.409172	0.682413	0.918824
ENSG00000010379	SLC6A13	4.01143	0.942276	3.45296	0.27289	0.784938	NA
ENSG00000010404	IDS	11071.6	1.06679	0.416893	2.55891	0.0105001	0.113868
ENSG00000010438	PRSS3	1.11811	-0.843037	3.4662	-0.243217	0.807838	NA
ENSG00000010539	ZNF200	739.01	-0.545346	0.47039	-1.15935	0.246314	0.658856
ENSG00000010610	CD4	4081.75	-2.35235	0.910149	-2.58458	0.00974976	0.10883
ENSG00000010626	LRRC23	260.1	0.133453	0.575389	0.231936	0.816588	0.957833
ENSG00000010671	BTK	2255.22	-0.36612	0.445029	-0.822688	0.410685	0.790142
ENSG00000010704	HFE	154.091	-4.2646	1.39425	-3.05871	0.00222295	0.0395143
ENSG00000010803	SCMH1	1603.16	0.518152	0.490336	1.05673	0.290635	0.701428
ENSG00000010810	FYN	3885.55	-0.508466	0.510563	-0.995893	0.319302	0.729157
ENSG00000010818	HIVEP2	588.176	0.172857	0.643776	0.268505	0.788311	0.952052
ENSG00000010932	FMO1	29.4279	-0.0865374	0.73392	-0.117911	0.906138	0.979226
ENSG00000011007	ELOA	4109.32	0.0221054	0.386291	0.0572247	0.954366	0.991623
ENSG00000011009	LYPLA2	2817.63	-0.428395	0.330389	-1.29664	0.194756	0.605211
ENSG00000011021	CLCN6	770.048	-0.337754	0.437288	-0.772382	0.439888	0.806767
ENSG00000011028	MRC2	819.899	-2.42149	0.575445	-4.20804	2.58e-05	0.00148284
ENSG00000011052	NME1-NME2	0	NA	NA	NA	NA	NA
ENSG00000011083	SLC6A7	9.41901	-1.34532	3.45106	-0.389827	0.696665	NA
ENSG00000011105	TSPAN9	156.928	-2.70227	0.838674	-3.22207	0.00127267	0.0265558
ENSG00000011114	BTBD7	1099.79	-0.125702	0.395997	-0.317432	0.750916	0.940343
ENSG00000011132	APBA3	626.637	-0.539043	0.402796	-1.33825	0.180814	0.586835
ENSG00000011143	MKS1	537.096	0.171918	0.480062	0.358117	0.720256	0.931335
ENSG00000011198	ABHD5	1637.9	-0.277995	0.468185	-0.59377	0.552666	0.869598
ENSG00000011201	ANOS1	58.3076	-1.44796	1.65643	-0.874145	0.382039	0.773998
ENSG00000011243	AKAP8L	5515.61	0.592186	0.423016	1.39991	0.161539	0.559222
ENSG00000011258	MBTD1	719.887	0.155324	0.532328	0.291782	0.770453	0.945434
ENSG00000011260	UTP18	3748.17	-0.100025	0.383031	-0.261141	0.793984	0.952908
ENSG00000011275	RNF216	3614.37	0.244171	0.44382	0.550157	0.582211	0.880747
ENSG00000011295	TTC19	5980.9	0.417912	0.393866	1.06105	0.288666	0.700112
ENSG00000011304	PTBP1	21023.2	0.132135	0.376639	0.350826	0.725719	0.932557
ENSG00000011332	DPF1	78.3164	2.32865	1.26362	1.84284	0.0653521	0.348157
ENSG00000011347	SYT7	15.9395	-4.06231	3.13691	-1.295	0.195319	0.606018
ENSG00000011376	LARS2	1046.92	-0.0406646	0.357369	-0.113789	0.909405	0.980029
ENSG00000011405	PIK3C2A	894.486	-0.45855	0.507059	-0.904331	0.36582	0.762812
ENSG00000011422	PLAUR	13507.5	-0.427706	0.710232	-0.602206	0.547037	0.86697
ENSG00000011426	ANLN	760.788	-0.84651	0.658946	-1.28464	0.198917	0.609428
ENSG00000011451	WIZ	613.474	-0.254902	0.455393	-0.55974	0.575657	0.878114
ENSG00000011454	RABGAP1	1143.19	-0.213208	0.480597	-0.443632	0.657309	0.910188
ENSG00000011465	DCN	2980.97	-4.19044	0.901718	-4.64717	3.37e-06	0.000318834
ENSG00000011478	QPCTL	424.804	0.106582	0.56009	0.190294	0.849079	0.964761
ENSG00000011485	PPP5C	1374.81	-0.817996	0.399565	-2.04722	0.040637	0.262844
ENSG00000011523	CEP68	3205.42	0.351576	0.397405	0.884679	0.37633	0.769285
ENSG00000011566	MAP4K3	1801.77	0.108606	0.336866	0.3224	0.74715	0.939857
ENSG00000011590	ZBTB32	101.989	-0.119741	1.21343	-0.0986792	0.921393	0.984135
ENSG00000011600	TYROBP	3369	-1.5136	0.715337	-2.11593	0.0343508	0.237357
ENSG00000011638	TMEM159	718.722	0.532979	0.41863	1.27315	0.202964	0.612854
ENSG00000011677	GABRA3	0	NA	NA	NA	NA	NA
ENSG00000012048	BRCA1	357.003	-0.921659	0.627307	-1.46923	0.14177	0.525815
ENSG00000012061	ERCC1	3000.84	0.01664	0.457857	0.0363432	0.971009	0.993901
ENSG00000012124	CD22	210.987	-0.260074	0.588397	-0.442005	0.658486	0.910568
ENSG00000012171	SEMA3B	1.98221	2.16066	3.46284	0.623955	0.532657	NA
ENSG00000012174	MBTPS2	606.357	-0.518457	0.467724	-1.10847	0.26766	0.679949
ENSG00000012211	PRICKLE3	344.71	0.284271	0.662925	0.428813	0.668059	0.913612
ENSG00000012223	LTF	32404.5	-3.14077	0.957283	-3.28093	0.00103467	0.022971
ENSG00000012232	EXTL3	891.207	0.0320357	0.454078	0.070551	0.943755	0.989846
ENSG00000012504	NR1H4	0.20598	0.847058	3.51013	0.241318	0.809309	NA
ENSG00000012660	ELOVL5	6871.66	0.0891536	0.422393	0.211068	0.832834	0.961895
ENSG00000012779	ALOX5	927.55	-2.99869	0.815464	-3.67728	0.000235739	0.00784555
ENSG00000012817	KDM5D	410.404	-0.723325	0.675845	-1.07025	0.284506	0.695958
ENSG00000012822	CALCOCO1	2461.91	-0.986947	0.334517	-2.95037	0.00317396	0.0507758
ENSG00000012963	UBR7	2719.83	0.341612	0.505262	0.676109	0.498971	0.842117
ENSG00000012983	MAP4K5	2941.83	0.243633	0.455066	0.535381	0.592386	0.885516
ENSG00000013016	EHD3	1418.33	-2.63681	0.636416	-4.14322	3.42e-05	0.00180359
ENSG00000013275	PSMC4	4632.47	-0.115609	0.372295	-0.310531	0.756157	0.942009
ENSG00000013288	MAN2B2	2157.47	-0.42791	0.378787	-1.12969	0.258609	0.67077
ENSG00000013293	SLC7A14	0	NA	NA	NA	NA	NA
ENSG00000013297	CLDN11	3.65008	-1.79817	3.39671	-0.529387	0.596537	NA
ENSG00000013306	SLC25A39	7024.52	-0.732565	0.431128	-1.69918	0.0892853	0.410351
ENSG00000013364	MVP	6793.65	-0.725762	0.619907	-1.17076	0.241696	0.653357
ENSG00000013374	NUB1	3178.51	0.378669	0.420178	0.90121	0.367476	0.764136
ENSG00000013375	PGM3	690.019	-1.02429	0.575391	-1.78017	0.0750484	0.374996
ENSG00000013392	RWDD2A	104.914	-1.23088	0.712968	-1.72642	0.0842724	0.39913
ENSG00000013441	CLK1	8873.42	0.875927	0.477412	1.83474	0.0665442	0.35136
ENSG00000013503	POLR3B	210.367	-1.26682	0.650441	-1.94763	0.0514588	0.304448
ENSG00000013523	ANGEL1	1104.91	0.191721	0.501018	0.382663	0.70197	0.925298
ENSG00000013561	RNF14	1342.97	-0.274717	0.456497	-0.601794	0.547311	0.86697
ENSG00000013563	DNASE1L1	414.753	-0.425666	0.427865	-0.994859	0.319805	0.729565
ENSG00000013573	DDX11	1040.56	-0.166566	0.470879	-0.353734	0.723538	0.931972
ENSG00000013583	HEBP1	2543.19	-0.0683841	0.477521	-0.143206	0.886127	0.973519
ENSG00000013588	GPRC5A	586.11	-2.76821	1.38727	-1.99543	0.0459963	0.284364
ENSG00000013619	MAMLD1	244.833	-2.35111	1.16894	-2.01132	0.0442912	0.277198
ENSG00000013725	CD6	733.406	-1.87421	0.72334	-2.59105	0.00956838	0.107566
ENSG00000013810	TACC3	5233.07	-0.218928	0.405633	-0.539718	0.589391	0.884084
ENSG00000014123	UFL1	2112.82	0.206403	0.387099	0.533205	0.593892	0.88661
ENSG00000014138	POLA2	1176.77	-0.328084	0.540048	-0.607508	0.543514	0.865126
ENSG00000014164	ZC3H3	3771.27	0.309491	0.460115	0.672638	0.501178	0.842687
ENSG00000014216	CAPN1	7634.17	-0.509976	0.407285	-1.25213	0.210521	0.621891
ENSG00000014257	ACPP	185.783	-0.752658	1.04039	-0.72344	0.46941	0.824314
ENSG00000014641	MDH1	7211.05	-0.164111	0.400539	-0.409727	0.682006	0.918726
ENSG00000014824	SLC30A9	3326.11	0.116415	0.398565	0.292084	0.770222	0.945388
ENSG00000014914	MTMR11	104.192	-0.998899	0.981944	-1.01727	0.309026	0.719723
ENSG00000014919	COX15	983.575	-0.343262	0.410061	-0.837101	0.402536	0.785024
ENSG00000015133	CCDC88C	1627.79	-0.464899	0.443814	-1.04751	0.294865	0.704757
ENSG00000015153	YAF2	1201.22	0.517483	0.440149	1.1757	0.239716	0.651593
ENSG00000015171	ZMYND11	1949.54	-0.516599	0.452081	-1.14271	0.253158	0.66611
ENSG00000015285	WAS	1333.55	-0.563913	0.451538	-1.24887	0.211712	0.622494
ENSG00000015413	DPEP1	358.268	-4.29785	1.15929	-3.70731	0.00020947	0.0071516
ENSG00000015475	BID	6660.6	-0.292738	0.353331	-0.828508	0.407383	0.788234
ENSG00000015479	MATR3	173.917	-0.0688131	0.464232	-0.14823	0.882161	0.973396
ENSG00000015520	NPC1L1	6.13657	-0.0570048	3.35144	-0.017009	0.986429	NA
ENSG00000015532	XYLT2	440.502	-1.32569	0.695239	-1.90681	0.0565452	0.322869
ENSG00000015568	RGPD5	109.754	0.773836	0.48917	1.58194	0.113664	0.467051
ENSG00000015592	STMN4	0	NA	NA	NA	NA	NA
ENSG00000015676	NUDCD3	1804.24	-0.0607162	0.415095	-0.146271	0.883708	0.973519
ENSG00000016082	ISL1	1.76782	-1.21498	3.45855	-0.351299	0.725364	NA
ENSG00000016391	CHDH	58.5664	-0.82283	1.76278	-0.466779	0.640658	0.903654
ENSG00000016402	IL20RA	0	NA	NA	NA	NA	NA
ENSG00000016490	CLCA1	1.44186	1.34633	3.47016	0.387974	0.698036	NA
ENSG00000016602	CLCA4	0	NA	NA	NA	NA	NA
ENSG00000016864	GLT8D1	1284.95	-0.78523	0.483894	-1.62273	0.104647	0.448152
ENSG00000017260	ATP2C1	4229.09	0.497055	0.518752	0.958174	0.337975	0.742472
ENSG00000017427	IGF1	60.8742	-1.5533	1.33316	-1.16512	0.24397	0.655774
ENSG00000017483	SLC38A5	1831.71	-0.777363	0.390802	-1.98915	0.0466848	0.287366
ENSG00000017797	RALBP1	3803.68	0.208219	0.386137	0.539236	0.589724	0.884084
ENSG00000018189	RUFY3	729.717	0.0436962	0.454952	0.0960457	0.923484	0.98453
ENSG00000018236	CNTN1	102.956	-4.91008	1.18666	-4.13772	3.51e-05	0.00184242
ENSG00000018280	SLC11A1	414.629	-1.0965	0.94224	-1.16372	0.244538	0.656499
ENSG00000018408	WWTR1	894.785	-3.67153	0.857157	-4.28338	1.84e-05	0.00114719
ENSG00000018510	AGPS	2715.79	0.235978	0.377181	0.625636	0.531554	0.860249
ENSG00000018607	ZNF806	0	NA	NA	NA	NA	NA
ENSG00000018610	CXorf56	943.734	0.360255	0.397068	0.907288	0.364255	0.762029
ENSG00000018625	ATP1A2	30.2792	-2.75205	2.74634	-1.00208	0.316305	0.725946
ENSG00000018699	TTC27	1043.14	-0.763963	0.738344	-1.0347	0.30081	0.710594
ENSG00000018869	ZNF582	147.72	-0.60173	0.75982	-0.791938	0.428397	0.799959
ENSG00000019102	VSIG2	47.3379	-0.616696	1.4948	-0.412562	0.679928	0.91777
ENSG00000019144	PHLDB1	196.978	-1.72831	0.681481	-2.53611	0.0112093	0.119145
ENSG00000019169	MARCO	1020.38	-4.919	1.00452	-4.89689	9.74e-07	0.000118771
ENSG00000019186	CYP24A1	0	NA	NA	NA	NA	NA
ENSG00000019485	PRDM11	514.644	0.312516	0.654436	0.477535	0.632981	0.901131
ENSG00000019505	SYT13	0	NA	NA	NA	NA	NA
ENSG00000019549	SNAI2	666.957	-3.29058	1.04183	-3.15845	0.00158609	0.0312204
ENSG00000019582	CD74	252858	-0.252016	0.726784	-0.346755	0.728775	0.932557
ENSG00000019991	HGF	1054.66	0.124807	0.552307	0.225973	0.821222	0.958829
ENSG00000019995	ZRANB1	1581.34	0.573603	0.382095	1.5012	0.133303	0.508626
ENSG00000020129	NCDN	767.589	-1.21348	0.570307	-2.12777	0.033356	0.232185
ENSG00000020181	ADGRA2	436.731	-3.34299	0.768395	-4.35062	1.36e-05	0.000917474
ENSG00000020219	CCT8L1P	3.04315	0.938484	3.4543	0.271686	0.785864	NA
ENSG00000020256	ZFP64	353.605	-1.54549	0.702504	-2.19998	0.0278085	0.209219
ENSG00000020426	MNAT1	494.153	0.597243	0.368482	1.62082	0.105056	0.449024
ENSG00000020577	SAMD4A	221.71	-0.868869	0.865745	-1.00361	0.315567	0.725347
ENSG00000020633	RUNX3	16087.3	0.328384	0.459341	0.714903	0.474669	0.826902
ENSG00000020922	MRE11	1205.77	-0.378582	0.473059	-0.800284	0.423546	0.797742
ENSG00000021300	PLEKHB1	193.279	-0.462093	0.64607	-0.715237	0.474463	0.826669
ENSG00000021355	SERPINB1	25664.3	0.496072	0.351968	1.40942	0.15871	0.554182
ENSG00000021461	CYP3A43	0.224262	-1.03896	3.51271	-0.295772	0.767404	NA
ENSG00000021488	SLC7A9	0	NA	NA	NA	NA	NA
ENSG00000021574	SPAST	1043.75	0.20842	0.413459	0.504088	0.614199	0.894745
ENSG00000021645	NRXN3	65.9211	-2.58093	1.08903	-2.36993	0.0177917	0.16124
ENSG00000021762	OSBPL5	859.371	-0.777127	0.628031	-1.2374	0.215937	0.626913
ENSG00000021776	AQR	1853.28	0.181596	0.34485	0.526593	0.598476	0.887932
ENSG00000021826	CPS1	13.6158	-3.96765	2.5609	-1.54932	0.121305	0.484375
ENSG00000021852	C8B	2.20978	-1.22108	3.45663	-0.353259	0.723895	NA
ENSG00000022267	FHL1	4661.47	-0.526984	0.47247	-1.11538	0.264687	0.67759
ENSG00000022277	RTF2	7004.08	0.406175	0.327729	1.23936	0.215211	0.625971
ENSG00000022355	GABRA1	0.619169	-1.32657	3.47871	-0.381339	0.702952	NA
ENSG00000022556	NLRP2	244.211	-0.108167	0.911781	-0.118632	0.905567	0.979226
ENSG00000022567	SLC45A4	602.896	-0.38976	0.61201	-0.636851	0.524222	0.855989
ENSG00000022840	RNF10	24699.9	0.361115	0.427213	0.845282	0.397953	0.78278
ENSG00000022976	ZNF839	314.161	0.214518	0.543028	0.39504	0.692813	0.923098
ENSG00000023041	ZDHHC6	1929.36	-0.0370005	0.368895	-0.100301	0.920105	0.984
ENSG00000023171	GRAMD1B	890.075	0.395801	0.401528	0.985737	0.324262	0.732828
ENSG00000023191	RNH1	11494.3	-0.748015	0.39425	-1.89731	0.0577866	0.326837
ENSG00000023228	NDUFS1	3810.72	0.249167	0.418215	0.595788	0.551317	0.868649
ENSG00000023287	RB1CC1	9889.21	0.447171	0.45789	0.976592	0.328771	0.737049
ENSG00000023318	ERP44	8344.73	-0.0490262	0.434908	-0.112728	0.910246	0.980509
ENSG00000023330	ALAS1	5110.37	-0.942806	0.49182	-1.91697	0.0552412	0.318546
ENSG00000023445	BIRC3	2723.28	-0.647256	0.475885	-1.36011	0.173795	0.576948
ENSG00000023516	AKAP11	421.817	-0.48601	0.584413	-0.83162	0.405623	0.78708
ENSG00000023572	GLRX2	680.806	-0.190908	0.413786	-0.46137	0.644533	0.905116
ENSG00000023608	SNAPC1	666.113	0.588338	0.400742	1.46812	0.142071	0.526275
ENSG00000023697	DERA	2264.96	-0.167026	0.416929	-0.400611	0.688706	0.920848
ENSG00000023734	STRAP	21723.8	0.796538	0.326365	2.44064	0.0146614	0.141433
ENSG00000023839	ABCC2	13.7165	-0.400135	1.74279	-0.229594	0.818407	0.957864
ENSG00000023892	DEF6	3674.6	-0.376234	0.365417	-1.0296	0.303197	0.713083
ENSG00000023902	PLEKHO1	5970.7	-0.170752	0.492804	-0.34649	0.728975	0.932583
ENSG00000023909	GCLM	2265.87	-0.708632	0.422677	-1.67653	0.0936335	0.421622
ENSG00000024048	UBR2	1219.06	-0.00161164	0.405784	-0.00397168	0.996831	0.999332
ENSG00000024422	EHD2	1773.46	-1.16029	0.661267	-1.75465	0.07932	0.385811
ENSG00000024526	DEPDC1	397.161	0.458716	0.777884	0.589698	0.555393	0.870373
ENSG00000024862	CCDC28A	2963.08	0.658834	0.394686	1.66926	0.0950659	0.426483
ENSG00000025039	RRAGD	2338.21	-0.064003	0.350911	-0.182391	0.855276	0.96636
ENSG00000025156	HSF2	3278.92	0.56698	0.446633	1.26945	0.204279	0.614167
ENSG00000025293	PHF20	3892.63	0.576975	0.328922	1.75414	0.0794067	0.385811
ENSG00000025423	HSD17B6	16.355	0.884189	1.549	0.570814	0.568126	0.875044
ENSG00000025434	NR1H3	1153.41	-0.375788	0.603065	-0.623131	0.533199	0.86093
ENSG00000025708	TYMP	3737.12	-1.90217	0.792048	-2.40158	0.0163245	0.152016
ENSG00000025770	NCAPH2	2918.78	-0.0373653	0.344945	-0.108323	0.91374	0.982041
ENSG00000025772	TOMM34	3244.29	0.309946	0.341858	0.906652	0.364591	0.762208
ENSG00000025796	SEC63	4290.9	0.225387	0.367156	0.613873	0.539299	0.864567
ENSG00000025800	KPNA6	2862.83	0.132772	0.460357	0.288411	0.773032	0.946473
ENSG00000026025	VIM	15966.9	0.415364	0.64055	0.648448	0.516695	0.851317
ENSG00000026036	RTEL1-TNFRSF6B	34.5259	0.0881264	0.745762	0.11817	0.905933	0.979226
ENSG00000026103	FAS	1046.46	-0.808014	0.535558	-1.50873	0.131367	0.506323
ENSG00000026297	RNASET2	4722.67	-0.676964	0.579305	-1.16858	0.242573	0.654168
ENSG00000026508	CD44	32583.1	0.441766	0.549284	0.804259	0.421248	0.79673
ENSG00000026559	KCNG1	1.8836	-2.47516	3.44902	-0.717641	0.472979	NA
ENSG00000026652	AGPAT4	286.694	0.0378356	0.489353	0.0773175	0.938371	0.988858
ENSG00000026751	SLAMF7	2950.93	-5.12364	0.841634	-6.08773	1.15e-09	5.15e-07
ENSG00000026950	BTN3A1	758.057	-1.78037	0.513483	-3.46724	0.000525842	0.0141056
ENSG00000027001	MIPEP	693.684	-1.47895	0.626959	-2.35893	0.018328	0.164371
ENSG00000027075	PRKCH	4709.34	0.588775	0.336521	1.74959	0.0801883	0.388047
ENSG00000027644	INSRR	7.87362	3.28489	3.35168	0.980073	0.32705	NA
ENSG00000027697	IFNGR1	13396.7	-0.205382	0.509275	-0.403284	0.68674	0.920322
ENSG00000027847	B4GALT7	1281.78	-0.326859	0.556211	-0.587652	0.556766	0.870681
ENSG00000027869	SH2D2A	632.139	0.616762	0.579052	1.06512	0.28682	0.698156
ENSG00000028116	VRK2	1324.97	0.167319	0.356435	0.469424	0.638767	0.903045
ENSG00000028137	TNFRSF1B	9682.77	-1.00925	0.672512	-1.50071	0.13343	0.508893
ENSG00000028203	VEZT	4757.27	0.63529	0.373698	1.70001	0.0891292	0.410069
ENSG00000028277	POU2F2	624.236	-0.554043	0.584948	-0.947166	0.343554	0.747425
ENSG00000028310	BRD9	1162.57	0.207807	0.504184	0.412166	0.680218	0.917803
ENSG00000028528	SNX1	3739.39	-0.224592	0.446467	-0.503043	0.614934	0.894745
ENSG00000028839	TBPL1	1894.15	0.0760656	0.461314	0.164889	0.869031	0.97041
ENSG00000029153	ARNTL2	649.829	1.0318	0.410988	2.51053	0.012055	0.124719
ENSG00000029363	BCLAF1	12467.7	0.58877	0.394653	1.49187	0.135734	0.513919
ENSG00000029364	SLC39A9	1889.07	-0.282746	0.34899	-0.810185	0.417834	0.79451
ENSG00000029534	ANK1	2383.32	-1.20336	1.01626	-1.18411	0.236371	0.648939
ENSG00000029559	IBSP	10.2471	-4.44937	3.38268	-1.31534	0.188396	NA
ENSG00000029639	TFB1M	270.631	-0.18716	0.618064	-0.302817	0.762029	0.943821
ENSG00000029725	RABEP1	2126.9	-0.274695	0.449419	-0.611222	0.541052	0.864744
ENSG00000029993	HMGB3	2379.63	0.212077	0.457435	0.463621	0.642919	0.90437
ENSG00000030066	NUP160	2770.54	-0.00335472	0.420162	-0.00798435	0.993629	0.99919
ENSG00000030110	BAK1	4963.57	0.565434	0.456808	1.23779	0.215793	0.626913
ENSG00000030304	MUSK	1.23344	-1.29461	3.46588	-0.373529	0.708755	NA
ENSG00000030419	IKZF2	170.221	0.172618	0.599698	0.287841	0.773468	0.94676
ENSG00000030582	GRN	26737.5	-1.37887	0.551935	-2.49824	0.012481	0.127458
ENSG00000031003	FAM13B	1992.43	0.430318	0.425419	1.01151	0.31177	0.722574
ENSG00000031081	ARHGAP31	678.475	-1.3032	0.8073	-1.61427	0.10647	0.453011
ENSG00000031691	CENPQ	462.246	-0.586599	0.427445	-1.37234	0.169958	0.571983
ENSG00000031698	SARS	2715.66	-0.687843	0.466358	-1.47492	0.140233	0.523745
ENSG00000031823	RANBP3	522.252	-0.125124	0.374845	-0.333801	0.73853	0.937099
ENSG00000032219	ARID4A	3842.36	0.25364	0.324774	0.780973	0.434818	0.804407
ENSG00000032389	EIPR1	1038.75	-0.270199	0.406745	-0.664297	0.5065	0.845448
ENSG00000032444	PNPLA6	633.695	-1.16026	0.505868	-2.29361	0.0218129	0.181792
ENSG00000032742	IFT88	579.929	0.0305586	0.420966	0.0725917	0.942131	0.98976
ENSG00000033011	ALG1	955.026	-0.872612	0.477427	-1.82774	0.0675889	0.354006
ENSG00000033030	ZCCHC8	1392.75	0.135797	0.400679	0.338918	0.734672	0.934269
ENSG00000033050	ABCF2	439.073	-0.640461	0.424998	-1.50697	0.131817	0.506699
ENSG00000033100	CHPF2	7058.05	0.585963	0.372711	1.57217	0.115912	0.471212
ENSG00000033122	LRRC7	57.2214	-0.0229127	0.860136	-0.0266384	0.978748	0.994618
ENSG00000033170	FUT8	906.408	-0.893345	0.480176	-1.86045	0.0628212	0.340588
ENSG00000033178	UBA6	1480.71	-0.101175	0.426338	-0.237313	0.812414	0.956462
ENSG00000033327	GAB2	2836.13	1.06549	0.489512	2.17664	0.0295074	0.217017
ENSG00000033627	ATP6V0A1	1089.31	-0.60944	0.440539	-1.3834	0.166543	0.566364
ENSG00000033800	PIAS1	7496.79	0.332712	0.335535	0.991587	0.321399	0.730033
ENSG00000033867	SLC4A7	359.093	-0.769296	0.617687	-1.24545	0.212968	0.623199
ENSG00000034053	APBA2	209.43	-0.0918304	1.02292	-0.0897726	0.928468	0.98566
ENSG00000034152	MAP2K3	18673.9	-0.270492	0.355261	-0.761387	0.446426	0.811481
ENSG00000034239	EFCAB1	5.85253	-4.25097	2.6499	-1.6042	0.10867	NA
ENSG00000034510	TMSB10	21116.9	-0.498426	0.588763	-0.846564	0.397238	0.782386
ENSG00000034533	ASTE1	694.706	0.352412	0.423678	0.831791	0.405527	0.787047
ENSG00000034677	RNF19A	3728.18	0.0342106	0.486372	0.0703383	0.943924	0.989846
ENSG00000034693	PEX3	1045.97	0.358163	0.471415	0.759763	0.447396	0.81169
ENSG00000034713	GABARAPL2	5405.75	-0.134115	0.326708	-0.410503	0.681437	0.918571
ENSG00000034971	MYOC	1.32587	-1.2051	3.46169	-0.348126	0.727745	NA
ENSG00000035115	SH3YL1	590.786	-0.267554	0.404408	-0.661595	0.508231	0.846567
ENSG00000035141	FAM136A	3026.77	0.164357	0.370796	0.443254	0.657582	0.910381
ENSG00000035403	VCL	5591.34	-0.762228	0.667285	-1.14228	0.253337	0.666389
ENSG00000035499	DEPDC1B	549.698	-0.87415	0.716208	-1.22052	0.222266	0.632534
ENSG00000035664	DAPK2	158.423	-4.05496	0.874883	-4.63486	3.57e-06	0.000335213
ENSG00000035681	NSMAF	4293.59	0.371385	0.467556	0.794312	0.427014	0.7995
ENSG00000035687	ADSS	1011.41	-0.433661	0.500513	-0.866431	0.386254	0.776873
ENSG00000035720	STAP1	200.263	-0.713036	0.948528	-0.751729	0.452214	0.814399
ENSG00000035862	TIMP2	305.335	-0.322752	0.484012	-0.666827	0.504883	0.844647
ENSG00000035928	RFC1	2379.98	0.189938	0.441266	0.430438	0.666877	0.913612
ENSG00000036054	TBC1D23	4640.12	-0.136901	0.438831	-0.311969	0.755064	0.941516
ENSG00000036257	CUL3	5527.57	-0.0864587	0.391919	-0.220603	0.825401	0.960149
ENSG00000036448	MYOM2	89.5523	2.91254	1.17312	2.48272	0.0130382	0.130593
ENSG00000036473	OTC	0	NA	NA	NA	NA	NA
ENSG00000036530	CYP46A1	10.5359	-5.40545	1.76444	-3.06355	0.00218729	NA
ENSG00000036549	AC118549.1	2399.63	0.341835	0.400745	0.852998	0.39366	0.780385
ENSG00000036565	SLC18A1	0.552444	-1.15539	3.47805	-0.332196	0.739742	NA
ENSG00000036672	USP2	87.2349	-5.93138	1.28646	-4.61062	4.01e-06	0.000373234
ENSG00000036828	CASR	0	NA	NA	NA	NA	NA
ENSG00000037042	TUBG2	412.165	-1.0127	0.47147	-2.14797	0.0317164	0.22574
ENSG00000037241	RPL26L1	890.416	-0.242718	0.498202	-0.487188	0.626125	0.899308
ENSG00000037280	FLT4	734.542	-2.92787	0.834293	-3.5094	0.000449111	0.0125081
ENSG00000037474	NSUN2	3169.05	-0.271884	0.401287	-0.677529	0.498071	0.842065
ENSG00000037637	FBXO42	2720.48	0.460607	0.336736	1.36786	0.171357	0.573425
ENSG00000037749	MFAP3	488.763	-0.977857	0.442379	-2.21045	0.0270738	0.205723
ENSG00000037757	MRI1	509.426	-0.190171	0.528162	-0.360061	0.718801	0.930867
ENSG00000037897	METTL1	604.614	-0.545758	0.501947	-1.08728	0.276913	0.688987
ENSG00000037965	HOXC8	1.76782	-1.21498	3.45855	-0.351299	0.725364	NA
ENSG00000038002	AGA	1240.56	-0.344007	0.427793	-0.804144	0.421314	0.79673
ENSG00000038210	PI4K2B	770.719	-0.477694	0.62979	-0.758498	0.448153	0.812357
ENSG00000038219	BOD1L1	2864.78	0.278971	0.335318	0.83196	0.405432	0.786965
ENSG00000038274	MAT2B	7078.29	-0.296325	0.483647	-0.612687	0.540083	0.86464
ENSG00000038295	TLL1	2.67183	-2.25488	3.37953	-0.667217	0.504634	NA
ENSG00000038358	EDC4	3124.95	0.133844	0.493473	0.271229	0.786215	0.951098
ENSG00000038382	TRIO	616.302	-0.070505	0.374914	-0.188056	0.850832	0.965065
ENSG00000038427	VCAN	3434.01	-3.45823	0.936233	-3.69377	0.000220956	0.00740333
ENSG00000038532	CLEC16A	1127.19	-0.134056	0.502336	-0.266865	0.789573	0.952078
ENSG00000038945	MSR1	174.121	-2.76808	0.980211	-2.82396	0.00474341	0.0674133
ENSG00000039068	CDH1	203.239	-3.78083	1.15497	-3.27353	0.00106215	0.0234478
ENSG00000039123	MTREX	2686.98	0.0452358	0.382956	0.118123	0.90597	0.979226
ENSG00000039139	DNAH5	10.4853	5.87193	2.73985	2.14315	0.0321007	NA
ENSG00000039319	ZFYVE16	779.935	-0.671568	0.72988	-0.920107	0.357517	0.758535
ENSG00000039523	RIPOR1	1713.68	-0.521345	0.514458	-1.01339	0.310876	0.72207
ENSG00000039537	C6	7.73422	-1.23929	3.45098	-0.359112	0.719511	NA
ENSG00000039560	RAI14	1260.88	-2.94567	0.864336	-3.40801	0.000654382	0.01632
ENSG00000039600	SOX30	15.1977	-3.407	1.66983	-2.04033	0.0413175	0.265528
ENSG00000039650	PNKP	1479.9	-0.495717	0.387434	-1.27949	0.200725	0.610639
ENSG00000039987	BEST2	0	NA	NA	NA	NA	NA
ENSG00000040199	PHLPP2	335.65	0.228702	0.450664	0.507479	0.611819	0.893471
ENSG00000040275	SPDL1	409.098	-0.631304	0.562178	-1.12296	0.261454	0.674188
ENSG00000040341	STAU2	1272.49	-0.495689	0.544144	-0.910952	0.362321	0.760472
ENSG00000040487	PQLC2	575.505	-0.247723	0.43226	-0.573087	0.566586	0.874811
ENSG00000040531	CTNS	510.606	-0.949775	0.438212	-2.16739	0.0302053	0.219906
ENSG00000040608	RTN4R	500.317	-0.184157	0.746834	-0.246583	0.805231	0.954344
ENSG00000040633	PHF23	1856.02	-0.166815	0.361191	-0.461846	0.644192	0.904849
ENSG00000040731	CDH10	79.5013	-1.65642	1.62628	-1.01854	0.308423	0.719193
ENSG00000040933	INPP4A	809.65	-0.383886	0.583779	-0.657588	0.510803	0.847856
ENSG00000041353	RAB27B	496.406	-1.27879	0.592729	-2.15747	0.0309692	0.223326
ENSG00000041357	PSMA4	7487.65	-0.120565	0.402869	-0.299266	0.764737	0.943892
ENSG00000041515	MYO16	20.6658	-0.862048	2.40799	-0.357994	0.720348	0.931335
ENSG00000041802	LSG1	2288.27	-0.350289	0.410325	-0.853687	0.393278	0.780332
ENSG00000041880	PARP3	568.374	-1.07837	0.48188	-2.23783	0.0252321	0.198587
ENSG00000041982	TNC	2472.39	-4.00189	0.883748	-4.52832	5.95e-06	0.000494097
ENSG00000041988	THAP3	1007.3	0.0485863	0.522787	0.092937	0.925954	0.98491
ENSG00000042062	RIPOR3	936.382	0.399815	0.908818	0.439929	0.659989	0.910681
ENSG00000042088	TDP1	1955.8	0.250168	0.446348	0.560479	0.575153	0.877961
ENSG00000042286	AIFM2	205.071	-0.598	1.12552	-0.531308	0.595205	0.887036
ENSG00000042304	C2orf83	1.02711	0.84182	3.46208	0.243154	0.807886	NA
ENSG00000042317	SPATA7	349.972	0.179368	0.580475	0.309003	0.757319	0.942501
ENSG00000042429	MED17	359.58	0.389582	0.52588	0.740819	0.458803	0.818202
ENSG00000042445	RETSAT	617.976	-0.947805	0.452506	-2.09457	0.0362095	0.245135
ENSG00000042493	CAPG	5793.94	-0.558639	0.475753	-1.17422	0.240307	0.651715
ENSG00000042753	AP2S1	2733.84	-0.677412	0.445171	-1.52169	0.128087	0.499863
ENSG00000042781	USH2A	5.44164	1.30367	3.33224	0.391229	0.695628	NA
ENSG00000042813	ZPBP	9.66097	1.05809	1.89125	0.559469	0.575841	NA
ENSG00000042832	TG	6.73766	-0.0801406	2.50396	-0.0320055	0.974468	NA
ENSG00000042980	ADAM28	2879.52	0.532048	0.466445	1.14064	0.254018	0.666853
ENSG00000043039	BARX2	0	NA	NA	NA	NA	NA
ENSG00000043093	DCUN1D1	3626.6	0.353043	0.417932	0.844738	0.398257	0.7828
ENSG00000043143	JADE2	791.407	-0.186074	0.409055	-0.454887	0.64919	0.907039
ENSG00000043355	ZIC2	0	NA	NA	NA	NA	NA
ENSG00000043462	LCP2	5281.57	-0.482523	0.33377	-1.44568	0.148268	0.536159
ENSG00000043514	TRIT1	666.904	-0.294632	0.42217	-0.6979	0.48524	0.834032
ENSG00000043591	ADRB1	65.5538	-0.36584	0.789186	-0.463566	0.642959	0.90437
ENSG00000044012	GUCA2B	0	NA	NA	NA	NA	NA
ENSG00000044090	CUL7	545.127	-0.174664	0.396041	-0.441024	0.659195	0.910681
ENSG00000044115	CTNNA1	5003.45	-0.801811	0.618843	-1.29566	0.195092	0.605708
ENSG00000044446	PHKA2	868.862	-0.282489	0.380502	-0.742413	0.457837	0.817428
ENSG00000044459	CNTLN	846.83	-0.257773	0.517102	-0.498495	0.618135	0.895808
ENSG00000044524	EPHA3	76.8108	-0.426065	3.3099	-0.128724	0.897576	0.97771
ENSG00000044574	HSPA5	97249.4	0.143267	0.596151	0.24032	0.810082	0.956048
ENSG00000046604	DSG2	1530.68	0.0304949	0.370697	0.0822637	0.934437	0.98739
ENSG00000046647	GEMIN8	493.668	0.0957882	0.441138	0.217139	0.8281	0.960745
ENSG00000046651	OFD1	1634.21	0.111397	0.402974	0.276439	0.782211	0.950062
ENSG00000046653	GPM6B	822.531	-2.43999	0.902708	-2.70297	0.00687233	0.0863489
ENSG00000046774	MAGEC2	0	NA	NA	NA	NA	NA
ENSG00000046889	PREX2	123.139	-2.68508	1.24276	-2.16059	0.0307272	0.222282
ENSG00000047056	WDR37	2214.24	0.0553446	0.451745	0.122513	0.902493	0.97873
ENSG00000047188	YTHDC2	646.151	-0.572321	0.460244	-1.24352	0.213677	0.623892
ENSG00000047230	CTPS2	753.669	0.319612	0.57712	0.553805	0.579712	0.879787
ENSG00000047249	ATP6V1H	3639.1	0.129203	0.422615	0.305723	0.759815	0.943821
ENSG00000047315	POLR2B	4161.7	0.089069	0.504984	0.17638	0.859996	0.967796
ENSG00000047346	FAM214A	1513.69	0.438861	0.432391	1.01496	0.310123	0.720805
ENSG00000047365	ARAP2	2118.54	0.0448069	0.492306	0.0910145	0.927481	0.985405
ENSG00000047410	TPR	4382.34	0.131569	0.386793	0.340155	0.73374	0.933777
ENSG00000047457	CP	1372.59	-3.84	1.05017	-3.65654	0.000255638	0.00823113
ENSG00000047578	KIAA0556	282.762	-0.0277033	0.621055	-0.0446068	0.964421	0.993773
ENSG00000047579	DTNBP1	2726.84	0.436816	0.349454	1.25	0.2113	0.622459
ENSG00000047597	XK	829.913	-1.43387	1.07486	-1.334	0.182203	0.588215
ENSG00000047617	ANO2	0.88391	-1.18633	3.46776	-0.342104	0.732273	NA
ENSG00000047621	C12orf4	976.202	-0.0556143	0.501365	-0.110926	0.911675	0.981354
ENSG00000047634	SCML1	117.314	-0.782701	1.11277	-0.703383	0.481817	0.83203
ENSG00000047644	WWC3	1512.49	0.260612	0.369579	0.70516	0.480711	0.831694
ENSG00000047648	ARHGAP6	139.65	-4.70424	1.31888	-3.56683	0.000361326	0.0107271
ENSG00000047662	FAM184B	46.2551	0.0693067	0.87104	0.0795678	0.936581	0.988128
ENSG00000047849	MAP4	2696.38	-0.717988	0.444059	-1.61688	0.105905	0.451388
ENSG00000047932	GOPC	702.141	0.083445	0.466094	0.17903	0.857914	0.967229
ENSG00000047936	ROS1	0.256777	0.756717	3.49745	0.216362	0.828705	NA
ENSG00000048028	USP28	260.059	-1.17041	0.646037	-1.81168	0.070035	0.360966
ENSG00000048052	HDAC9	321.985	-2.10676	0.61131	-3.4463	0.000568323	0.0147986
ENSG00000048140	TSPAN17	2691.87	-1.7651	0.415554	-4.24758	2.16e-05	0.00129274
ENSG00000048162	NOP16	1142.62	-0.499197	0.501616	-0.995177	0.31965	0.729565
ENSG00000048342	CC2D2A	47.8103	-4.36251	1.06101	-4.11166	3.93e-05	0.00202464
ENSG00000048392	RRM2B	2847.06	0.256158	0.358351	0.714824	0.474718	0.826914
ENSG00000048405	ZNF800	4561.77	0.541616	0.38011	1.42489	0.154188	0.545224
ENSG00000048462	TNFRSF17	326.524	-4.38495	1.1381	-3.85285	0.000116751	0.00454203
ENSG00000048471	SNX29	575.905	-0.431506	0.375852	-1.14807	0.250939	0.664601
ENSG00000048540	LMO3	4.49926	-2.71441	2.76903	-0.980276	0.32695	NA
ENSG00000048544	MRPS10	3424.69	-0.0566228	0.383666	-0.147583	0.882672	0.973519
ENSG00000048545	GUCA1A	0	NA	NA	NA	NA	NA
ENSG00000048649	RSF1	2712.13	0.218235	0.388886	0.56118	0.574675	0.877551
ENSG00000048707	VPS13D	716.218	0.00284336	0.565764	0.0050257	0.99599	0.99919
ENSG00000048740	CELF2	10156.5	0.348384	0.438017	0.795367	0.4264	0.799169
ENSG00000048828	FAM120A	1044.5	-0.209206	0.383066	-0.546137	0.584972	0.881803
ENSG00000048991	R3HDM1	1207.43	-0.216449	0.458824	-0.471747	0.637107	0.902743
ENSG00000049089	COL9A2	623.206	-1.82858	0.642	-2.84826	0.00439585	0.0637704
ENSG00000049130	KITLG	202.875	-4.04618	0.733578	-5.51568	3.47e-08	9.05e-06
ENSG00000049167	ERCC8	450.919	0.220861	0.490232	0.450523	0.652334	0.908298
ENSG00000049192	ADAMTS6	21.2275	-0.343451	1.35434	-0.253592	0.79981	0.953468
ENSG00000049239	H6PD	2389.94	-0.227251	0.375833	-0.604661	0.545404	0.866118
ENSG00000049245	VAMP3	5861.83	-0.358651	0.392182	-0.914502	0.360453	0.759379
ENSG00000049246	PER3	242.795	-2.22414	0.715044	-3.1105	0.00186774	0.0346301
ENSG00000049247	UTS2	1.53078	-1.15268	3.41765	-0.337274	0.73591	NA
ENSG00000049249	TNFRSF9	133.147	-2.64023	1.04936	-2.51603	0.0118687	0.123437
ENSG00000049283	EPN3	9.12138	-0.137334	3.09831	-0.0443256	0.964645	NA
ENSG00000049323	LTBP1	1800.73	-2.26438	0.861559	-2.62823	0.00858302	0.10039
ENSG00000049449	RCN1	1741.43	-0.349491	0.372927	-0.937157	0.348678	0.752126
ENSG00000049540	ELN	1303.78	0.811971	0.522567	1.55381	0.12023	0.481356
ENSG00000049541	RFC2	3264.64	0.563872	0.455699	1.23738	0.215946	0.626913
ENSG00000049618	ARID1B	5145.72	0.424148	0.483215	0.877762	0.380073	0.772498
ENSG00000049656	CLPTM1L	6920.76	-0.980052	0.454537	-2.15616	0.0310715	0.223497
ENSG00000049759	NEDD4L	3606.29	0.306599	0.502728	0.60987	0.541948	0.864967
ENSG00000049768	FOXP3	18.5257	2.24055	2.21156	1.01311	0.31101	0.72207
ENSG00000049769	PPP1R3F	234.144	-0.0874528	0.607373	-0.143985	0.885512	0.973519
ENSG00000049860	HEXB	7346.59	-0.653458	0.638095	-1.02408	0.305799	0.715942
ENSG00000049883	PTCD2	248.473	-0.427058	0.452865	-0.943014	0.345673	0.749184
ENSG00000050030	NEXMIF	13.3457	0.261511	2.84441	0.0919386	0.926747	0.984942
ENSG00000050130	JKAMP	3333.31	0.201557	0.426444	0.472646	0.636466	0.902398
ENSG00000050165	DKK3	106.867	-4.23387	1.73417	-2.44144	0.0146287	0.141433
ENSG00000050327	ARHGEF5	135.881	1.31727	0.557802	2.36154	0.0181994	0.163662
ENSG00000050344	NFE2L3	1221.57	0.256507	0.712952	0.359782	0.71901	0.930867
ENSG00000050393	MCUR1	1785.36	-0.393114	0.383696	-1.02454	0.305579	0.715595
ENSG00000050405	LIMA1	708.801	-1.54759	0.626047	-2.472	0.0134358	0.133361
ENSG00000050426	LETMD1	1190.74	0.648553	0.400911	1.6177	0.105728	0.450922
ENSG00000050438	SLC4A8	115.723	0.347097	0.460266	0.754123	0.450776	0.813665
ENSG00000050555	LAMC3	64.1262	-7.9242	3.36821	-2.35264	0.0186405	0.165747
ENSG00000050628	PTGER3	225.157	-4.02296	1.22103	-3.29471	0.000985218	0.0221194
ENSG00000050730	TNIP3	64.2261	-1.67965	1.80627	-0.929902	0.352422	0.755408
ENSG00000050748	MAPK9	2078.27	-0.327435	0.477149	-0.686231	0.492567	0.838255
ENSG00000050767	COL23A1	87.5783	-0.216706	0.688724	-0.314649	0.753028	0.941326
ENSG00000050820	BCAR1	1037.28	-3.40297	0.826124	-4.1192	3.8e-05	0.00197082
ENSG00000051009	FAM160A2	1196.02	-0.393492	0.407393	-0.965879	0.334105	0.740411
ENSG00000051108	HERPUD1	24908.3	-1.37942	0.89895	-1.53448	0.124912	0.493287
ENSG00000051128	HOMER3	409.031	-2.35961	0.612769	-3.85073	0.000117765	0.00456356
ENSG00000051180	RAD51	14.5492	-0.259917	0.974203	-0.266799	0.789624	0.952078
ENSG00000051341	POLQ	303.705	-0.891523	0.65102	-1.36943	0.170866	0.572988
ENSG00000051382	PIK3CB	2517.75	0.496461	0.457339	1.08554	0.277681	0.689224
ENSG00000051523	CYBA	23123.8	-1.12045	0.615911	-1.81918	0.0688835	0.357565
ENSG00000051596	THOC3	938.511	-0.439808	0.382662	-1.14934	0.250418	0.663653
ENSG00000051620	HEBP2	4962.9	0.270693	0.369713	0.73217	0.464065	0.820557
ENSG00000051825	MPHOSPH9	1547.6	0.151443	0.487952	0.310363	0.756285	0.942009
ENSG00000052126	PLEKHA5	1653.02	0.721978	0.444144	1.62555	0.104046	0.447276
ENSG00000052344	PRSS8	7.90712	0.29789	3.19933	0.0931102	0.925816	NA
ENSG00000052723	SIKE1	1958.48	0.743166	0.404422	1.8376	0.0661214	0.351159
ENSG00000052749	RRP12	5957.89	-0.642948	0.71931	-0.89384	0.371408	0.767451
ENSG00000052795	FNIP2	2374.25	-0.479687	0.504926	-0.950016	0.342104	0.745764
ENSG00000052802	MSMO1	3666.1	0.240604	0.382763	0.628598	0.529612	0.859285
ENSG00000052841	TTC17	3417.08	0.117117	0.44155	0.26524	0.790825	0.952078
ENSG00000052850	ALX4	19.446	-1.24387	3.44958	-0.360585	0.71841	0.930867
ENSG00000053108	FSTL4	6.30315	-2.54853	3.43091	-0.742814	0.457594	NA
ENSG00000053254	FOXN3	5042.07	0.154385	0.378619	0.407758	0.683451	0.919518
ENSG00000053328	METTL24	33.9332	-2.63883	1.60733	-1.64175	0.100643	0.440328
ENSG00000053371	AKR7A2	3317.2	-0.278211	0.533551	-0.521432	0.602066	0.890221
ENSG00000053372	MRTO4	1959.98	-0.327285	0.390523	-0.838068	0.401993	0.784958
ENSG00000053438	NNAT	170.749	-1.40614	0.789862	-1.78024	0.0750365	0.374996
ENSG00000053501	USE1	1115.54	0.192095	0.369478	0.519909	0.603127	0.89048
ENSG00000053524	MCF2L2	101.361	0.71229	0.763066	0.933458	0.350583	0.753741
ENSG00000053702	NRIP2	56.3227	0.213887	0.780133	0.274167	0.783956	0.950502
ENSG00000053747	LAMA3	10.4239	-4.59602	2.20329	-2.08598	0.0369801	NA
ENSG00000053770	AP5M1	2439.07	0.116171	0.392559	0.295932	0.767282	0.944886
ENSG00000053900	ANAPC4	887.916	-0.358456	0.540069	-0.663724	0.506867	0.845558
ENSG00000053918	KCNQ1	874.355	-2.36553	0.825244	-2.86646	0.00415086	0.0612941
ENSG00000054116	TRAPPC3	3196.29	-0.291881	0.363085	-0.803892	0.42146	0.79673
ENSG00000054118	THRAP3	9070.12	0.00480278	0.334584	0.0143545	0.988547	0.998633
ENSG00000054148	PHPT1	1901.02	-0.540545	0.543446	-0.994662	0.319901	0.729565
ENSG00000054179	ENTPD2	7.37198	-2.66173	3.3428	-0.796258	0.425882	NA
ENSG00000054219	LY75	645.948	-0.986297	0.597932	-1.64952	0.0990421	0.435863
ENSG00000054267	ARID4B	7203.8	0.299713	0.364107	0.823144	0.410426	0.790136
ENSG00000054277	OPN3	139.309	-0.556049	0.498184	-1.11615	0.264357	0.677238
ENSG00000054282	SDCCAG8	1814.85	-0.194347	0.643822	-0.301865	0.762755	0.943821
ENSG00000054356	PTPRN	63.8314	-1.50093	1.93211	-0.776836	0.437256	0.805517
ENSG00000054392	HHAT	341.036	-0.178971	0.583289	-0.306831	0.758972	0.943213
ENSG00000054523	KIF1B	1297.15	-0.909239	0.539632	-1.68493	0.092003	0.417931
ENSG00000054598	FOXC1	326.3	-2.87831	0.877972	-3.27836	0.00104411	0.023101
ENSG00000054611	TBC1D22A	1512.66	-0.0556817	0.388516	-0.143319	0.886038	0.973519
ENSG00000054654	SYNE2	558.839	-3.21701	1.00043	-3.21563	0.00130159	0.0268759
ENSG00000054690	PLEKHH1	9.17572	-1.30606	2.93502	-0.44499	0.656327	NA
ENSG00000054793	ATP9A	687.26	-0.512841	0.796953	-0.643502	0.519899	0.852908
ENSG00000054796	SPO11	0	NA	NA	NA	NA	NA
ENSG00000054803	CBLN4	2.65173	-1.22522	3.45533	-0.354589	0.722897	NA
ENSG00000054938	CHRDL2	2.65173	-1.22522	3.45533	-0.354589	0.722897	NA
ENSG00000054965	FAM168A	255.144	0.498459	0.582421	0.85584	0.392086	0.779683
ENSG00000054967	RELT	2056.44	0.332033	0.417966	0.794401	0.426962	0.799498
ENSG00000054983	GALC	1921.61	-0.836507	0.530326	-1.57735	0.114716	0.469242
ENSG00000055044	NOP58	8938.27	0.165777	0.454939	0.364395	0.715563	0.9305
ENSG00000055070	SZRD1	3087.91	0.240531	0.378271	0.63587	0.524861	0.856685
ENSG00000055118	KCNH2	3465.93	-1.59804	0.913046	-1.75023	0.0800788	0.387991
ENSG00000055130	CUL1	4437.64	0.0394265	0.337092	0.116961	0.906891	0.979429
ENSG00000055147	FAM114A2	757.428	-0.158054	0.455484	-0.347003	0.728589	0.932557
ENSG00000055163	CYFIP2	6283.57	-0.0947697	0.416132	-0.22774	0.819849	0.958448
ENSG00000055208	TAB2	1521.04	0.449754	0.369102	1.21851	0.223031	0.633457
ENSG00000055211	GINM1	4175.34	0.299256	0.409075	0.731543	0.464447	0.820939
ENSG00000055332	EIF2AK2	4850.35	-0.151067	0.418446	-0.36102	0.718084	0.930867
ENSG00000055483	USP36	7942.16	0.795488	0.658768	1.20754	0.227225	0.638738
ENSG00000055609	KMT2C	4948.84	0.550311	0.393701	1.39779	0.162177	0.559855
ENSG00000055732	MCOLN3	0.513555	0.810814	3.4746	0.233355	0.815486	NA
ENSG00000055813	CCDC85A	12.3653	-1.68175	2.53921	-0.662315	0.507769	0.846012
ENSG00000055917	PUM2	3253.56	0.617006	0.465083	1.32666	0.184622	0.59181
ENSG00000055950	MRPL43	1770.35	0.0125387	0.383583	0.0326884	0.973923	0.994248
ENSG00000055955	ITIH4	2.09531	0.735904	2.93457	0.25077	0.801992	NA
ENSG00000055957	ITIH1	0	NA	NA	NA	NA	NA
ENSG00000056050	HPF1	618.031	-0.210751	0.37517	-0.561748	0.574288	0.877551
ENSG00000056097	ZFR	8290.16	0.361183	0.34077	1.0599	0.289189	0.700112
ENSG00000056277	ZNF280C	256.31	0.822357	0.790841	1.03985	0.298409	0.708749
ENSG00000056291	NPFFR2	0	NA	NA	NA	NA	NA
ENSG00000056487	PHF21B	0.224262	-1.03896	3.51271	-0.295772	0.767404	NA
ENSG00000056558	TRAF1	880.146	-1.08077	0.800039	-1.3509	0.176726	0.582389
ENSG00000056586	RC3H2	3756.11	0.715455	0.326407	2.19191	0.0283861	0.211874
ENSG00000056736	IL17RB	23.4246	-0.260115	0.860766	-0.302191	0.762507	0.943821
ENSG00000056972	TRAF3IP2	1352.38	0.145351	0.462215	0.314466	0.753167	0.941326
ENSG00000056998	GYG2	95.7157	-0.385199	0.810594	-0.475206	0.63464	0.901822
ENSG00000057019	DCBLD2	342.296	-0.17668	0.804987	-0.219482	0.826275	0.960149
ENSG00000057149	SERPINB3	30.5842	-0.455292	2.16489	-0.210307	0.833428	0.96194
ENSG00000057252	SOAT1	2211.63	-0.429698	0.462309	-0.92946	0.352651	0.755593
ENSG00000057294	PKP2	618.632	-1.67807	0.826966	-2.02919	0.0424389	0.269863
ENSG00000057468	MSH4	5.06601	-0.411842	1.89765	-0.217027	0.828187	NA
ENSG00000057593	F7	6.96022	-2.0541	3.37291	-0.608999	0.542525	NA
ENSG00000057608	GDI2	13391.3	0.14346	0.316667	0.453032	0.650526	0.907674
ENSG00000057657	PRDM1	1358.09	-1.7666	1.0634	-1.66127	0.0966591	0.429929
ENSG00000057663	ATG5	4380.64	0.263993	0.458343	0.575974	0.564633	0.874256
ENSG00000057704	TMCC3	416.553	-0.771138	0.624438	-1.23493	0.216857	0.627441
ENSG00000057757	PITHD1	4662.49	0.157529	0.377514	0.41728	0.676474	0.916545
ENSG00000057935	MTA3	358.124	0.0988517	0.39493	0.250302	0.802354	0.953961
ENSG00000058056	USP13	898.337	-0.245923	0.476704	-0.515883	0.605936	0.891107
ENSG00000058063	ATP11B	3497.05	0.237338	0.416144	0.570327	0.568456	0.875044
ENSG00000058085	LAMC2	20.1915	-4.35065	2.96474	-1.46746	0.142251	0.526581
ENSG00000058091	CDK14	730.08	0.0238337	0.428949	0.0555629	0.95569	0.992057
ENSG00000058262	SEC61A1	14145.7	-0.2655	0.38865	-0.683134	0.494522	0.83944
ENSG00000058272	PPP1R12A	6984.33	0.132122	0.465509	0.283822	0.776547	0.947861
ENSG00000058335	RASGRF1	12.9179	-3.07842	1.73897	-1.77026	0.076684	0.380143
ENSG00000058404	CAMK2B	19.5847	2.93268	1.45542	2.01501	0.0439033	0.275742
ENSG00000058453	CROCC	723.801	-0.514289	0.421026	-1.22152	0.221891	0.632394
ENSG00000058600	POLR3E	1692.15	-0.189886	0.437931	-0.433597	0.664581	0.912353
ENSG00000058668	ATP2B4	2248.68	-0.14192	0.411038	-0.345271	0.72989	0.932892
ENSG00000058673	ZC3H11A	8.00039	0.279998	1.49305	0.187534	0.851242	NA
ENSG00000058729	RIOK2	2045.9	0.0452233	0.433795	0.10425	0.916971	0.982993
ENSG00000058799	YIPF1	1104.22	-0.137478	0.513793	-0.267575	0.789027	0.952078
ENSG00000058804	NDC1	907.748	-0.316278	0.418819	-0.755167	0.450149	0.813322
ENSG00000058866	DGKG	426.111	-1.25624	0.575823	-2.18164	0.0291363	0.215443
ENSG00000059122	FLYWCH1	2112.36	-0.0395766	0.388308	-0.101921	0.91882	0.983668
ENSG00000059145	UNKL	777.016	-0.0826104	0.468802	-0.176216	0.860124	0.967796
ENSG00000059377	TBXAS1	3035.14	-0.843126	0.58135	-1.45029	0.146978	0.534519
ENSG00000059378	PARP12	1506.41	-0.827069	0.363597	-2.27468	0.0229249	0.187059
ENSG00000059573	ALDH18A1	3604.4	-0.693615	0.480574	-1.44331	0.148934	0.53739
ENSG00000059588	TARBP1	1592.94	0.260454	0.508338	0.512364	0.608396	0.892078
ENSG00000059691	GATB	710.443	0.0319597	0.340992	0.0937256	0.925327	0.984851
ENSG00000059728	MXD1	7133.52	0.525901	0.43585	1.20661	0.227582	0.63896
ENSG00000059758	CDK17	6346.49	0.29564	0.345173	0.856497	0.391723	0.779431
ENSG00000059769	DNAJC25	651.825	0.120479	0.405952	0.296783	0.766633	0.944617
ENSG00000059804	SLC2A3	29581.4	0.171842	0.469514	0.366001	0.714365	0.930103
ENSG00000059915	PSD	143.062	-0.18636	0.504922	-0.369087	0.712063	0.929919
ENSG00000060069	CTDP1	8368.44	0.719905	0.576212	1.24938	0.211528	0.622494
ENSG00000060138	YBX3	60357.3	0.717985	0.376219	1.90843	0.0563362	0.322558
ENSG00000060140	STYK1	64.8601	-0.108369	1.26895	-0.0854005	0.931943	0.987095
ENSG00000060237	WNK1	3469.48	-0.0727001	0.442252	-0.164386	0.869427	0.97041
ENSG00000060303	RPS17P5	12.0952	1.7447	1.19932	1.45474	0.145742	0.533037
ENSG00000060339	CCAR1	4668.26	0.298418	0.433971	0.687646	0.491676	0.837753
ENSG00000060491	OGFR	4400.2	-1.08796	0.435644	-2.49736	0.0125122	0.127583
ENSG00000060558	GNA15	51501.3	1.66456	0.609183	2.73244	0.00628676	0.0818477
ENSG00000060566	CREB3L3	70.1678	1.1635	1.35781	0.856893	0.391504	0.77923
ENSG00000060642	PIGV	484.695	-0.960606	0.662122	-1.4508	0.146836	0.534296
ENSG00000060656	PTPRU	110.806	-1.38796	1.56027	-0.889566	0.373699	0.768277
ENSG00000060688	SNRNP40	4715.75	0.190685	0.451429	0.422404	0.67273	0.915687
ENSG00000060709	RIMBP2	1.85382	1.36251	3.46577	0.393134	0.69422	NA
ENSG00000060718	COL11A1	78.8698	-1.61622	1.65787	-0.974875	0.329622	0.737346
ENSG00000060749	QSER1	348.879	-0.537013	0.498045	-1.07824	0.280926	0.692765
ENSG00000060762	MPC1	1861.43	-0.433633	0.534809	-0.810819	0.417469	0.79451
ENSG00000060971	ACAA1	2490.81	-0.363048	0.475083	-0.764178	0.444761	0.810823
ENSG00000060982	BCAT1	3310.18	0.239138	0.393329	0.607986	0.543197	0.865126
ENSG00000061273	HDAC7	2421.87	-0.254414	0.558533	-0.455505	0.648746	0.907039
ENSG00000061337	LZTS1	79.271	-5.64497	3.31431	-1.70321	0.0885291	0.408637
ENSG00000061455	PRDM6	1.54467	-1.26155	3.43735	-0.367012	0.71361	NA
ENSG00000061492	WNT8A	10.1503	2.7125	3.21835	0.842823	0.399327	NA
ENSG00000061656	SPAG4	669.64	-2.13011	0.90853	-2.34457	0.0190493	0.167949
ENSG00000061676	NCKAP1	310.741	-1.11636	1.14581	-0.974294	0.329911	0.737555
ENSG00000061794	MRPS35	4872.15	0.231956	0.452662	0.512426	0.608353	0.892078
ENSG00000061918	GUCY1B1	1439.79	-1.40774	0.563272	-2.49921	0.0124471	0.127272
ENSG00000061936	SFSWAP	2452.73	0.0847875	0.37463	0.226323	0.82095	0.958806
ENSG00000061938	TNK2	553.859	-0.150201	0.498914	-0.301055	0.763372	0.943821
ENSG00000061987	MON2	1642.01	0.287639	0.415271	0.692652	0.488528	0.836165
ENSG00000062038	CDH3	5.78849	1.38987	3.36807	0.412661	0.679855	NA
ENSG00000062096	ARSF	0	NA	NA	NA	NA	NA
ENSG00000062194	GPBP1	9279.98	0.00610443	0.348765	0.017503	0.986035	0.997163
ENSG00000062282	DGAT2	380.463	-1.26333	0.923396	-1.36813	0.171271	0.573425
ENSG00000062370	ZNF112	68.4399	-1.1906	1.24478	-0.956478	0.338831	0.74319
ENSG00000062485	CS	6828.57	-0.170699	0.3799	-0.449328	0.653195	0.90857
ENSG00000062524	LTK	118.653	-0.737465	0.883747	-0.834475	0.404013	0.78619
ENSG00000062582	MRPS24	23.8017	-0.222558	0.839948	-0.264966	0.791036	0.952078
ENSG00000062598	ELMO2	4496.19	-0.0270224	0.540882	-0.0499599	0.960154	0.993293
ENSG00000062650	WAPL	6549.65	0.212464	0.446423	0.475925	0.634128	0.901657
ENSG00000062716	VMP1	7898.86	0.252989	0.336835	0.751077	0.452607	0.814399
ENSG00000062725	APPBP2	1763.81	0.0577787	0.361311	0.159914	0.872949	0.971356
ENSG00000062822	POLD1	2523.16	-0.420493	0.522519	-0.804742	0.420969	0.796486
ENSG00000063015	SEZ6	120.017	2.31542	1.18459	1.95461	0.0506287	0.301337
ENSG00000063046	EIF4B	8298.15	0.48019	0.352571	1.36197	0.173208	0.575673
ENSG00000063127	SLC6A16	34.7379	-5.82276	1.31213	-4.43763	9.1e-06	0.000669535
ENSG00000063169	BICRA	169.128	-0.0271446	0.555561	-0.0488598	0.961031	0.993293
ENSG00000063176	SPHK2	752.182	0.228335	0.461514	0.494752	0.620775	0.897223
ENSG00000063177	RPL18	25084.3	0.92047	0.39571	2.32612	0.0200121	0.172596
ENSG00000063180	CA11	53.5924	-0.258059	1.16059	-0.222352	0.82404	0.959787
ENSG00000063241	ISOC2	1195.21	-1.077	0.392055	-2.74705	0.00601339	0.0792263
ENSG00000063244	U2AF2	572.401	0.413838	0.409082	1.01162	0.311717	0.722574
ENSG00000063245	EPN1	2762.16	-0.349189	0.465178	-0.750655	0.45286	0.814399
ENSG00000063322	MED29	3239.2	0.230293	0.352996	0.652397	0.514145	0.850655
ENSG00000063438	AHRR	16.3686	-3.69007	1.51839	-2.43025	0.0150886	0.143728
ENSG00000063515	GSC2	0	NA	NA	NA	NA	NA
ENSG00000063587	ZNF275	892.461	0.391804	0.434315	0.90212	0.366993	0.763843
ENSG00000063601	MTMR1	1356.85	0.477247	0.494328	0.965446	0.334322	0.740411
ENSG00000063660	GPC1	453.172	-3.78709	1.27317	-2.97454	0.00293426	0.0479812
ENSG00000063761	ADCK1	162.145	-2.87027	0.727297	-3.94649	7.93e-05	0.00333412
ENSG00000063854	HAGH	1639.27	-1.16757	0.467193	-2.49911	0.0124507	0.127272
ENSG00000063978	RNF4	7821.61	-0.00330723	0.462623	-0.00714885	0.994296	0.99919
ENSG00000064012	CASP8	7342.76	0.770117	0.447217	1.72202	0.0850657	0.401084
ENSG00000064042	LIMCH1	388.033	-2.62769	1.39865	-1.87872	0.0602821	0.334559
ENSG00000064102	INTS13	1624.94	0.474925	0.4712	1.0079	0.3135	0.724126
ENSG00000064115	TM7SF3	7282.87	-0.479699	0.611209	-0.784837	0.432549	0.803006
ENSG00000064195	DLX3	17.9264	-0.549027	1.57634	-0.348292	0.727621	0.932557
ENSG00000064199	SPA17	17.5732	-2.28298	1.25482	-1.81936	0.0688562	0.357565
ENSG00000064201	TSPAN32	1824.35	0.0958474	0.380826	0.251683	0.801286	0.953591
ENSG00000064205	WISP2	30.0688	-3.82668	2.71093	-1.41157	0.158075	0.553431
ENSG00000064218	DMRT3	0	NA	NA	NA	NA	NA
ENSG00000064225	ST3GAL6	826.478	-0.340614	0.470988	-0.723192	0.469562	0.824314
ENSG00000064270	ATP2C2	37.1879	-3.79637	1.35535	-2.80103	0.00509403	0.0707874
ENSG00000064300	NGFR	672.587	-4.60508	0.942889	-4.88401	1.04e-06	0.000123259
ENSG00000064309	CDON	3.22536	-2.19296	3.40517	-0.644009	0.519569	NA
ENSG00000064313	TAF2	2326.69	0.49788	0.43751	1.13798	0.255127	0.667639
ENSG00000064393	HIPK2	1780.1	0.280154	0.746214	0.375434	0.707338	0.928272
ENSG00000064419	TNPO3	2664.36	0.0646608	0.448467	0.144182	0.885357	0.973519
ENSG00000064489	BORCS8-MEF2B	0	NA	NA	NA	NA	NA
ENSG00000064490	RFXANK	1374.52	-0.155472	0.346632	-0.448522	0.653777	0.908804
ENSG00000064545	TMEM161A	1172.81	-0.437639	0.468067	-0.934992	0.349792	0.753217
ENSG00000064547	LPAR2	871.706	0.0107179	0.53924	0.019876	0.984142	0.996828
ENSG00000064601	CTSA	9911.05	-0.992568	0.429041	-2.31346	0.0206973	0.176337
ENSG00000064607	SUGP2	2306.24	0.475782	0.52408	0.907843	0.363961	0.761582
ENSG00000064651	SLC12A2	945.355	-0.212988	0.542275	-0.392768	0.694491	0.923976
ENSG00000064652	SNX24	128.956	-3.44181	1.11824	-3.07789	0.00208473	0.0377347
ENSG00000064655	EYA2	12.8867	-6.04109	2.6094	-2.31512	0.0206063	0.175806
ENSG00000064666	CNN2	18033.1	0.304266	0.326806	0.931028	0.351839	0.754799
ENSG00000064687	ABCA7	1001.51	-1.48323	0.538072	-2.75656	0.00584131	0.0776306
ENSG00000064692	SNCAIP	44.1586	-7.11405	1.31382	-5.41478	6.14e-08	1.4e-05
ENSG00000064703	DDX20	3055.16	0.632347	0.379914	1.66445	0.0960229	0.428656
ENSG00000064726	BTBD1	6295.95	0.143103	0.381579	0.375029	0.707639	0.928366
ENSG00000064763	FAR2	1272.05	-0.939347	0.4662	-2.0149	0.043915	0.275742
ENSG00000064787	BCAS1	0.887195	-2.27871	3.46559	-0.657524	0.510844	NA
ENSG00000064835	POU1F1	1.56694	-1.56361	3.40663	-0.458991	0.646241	NA
ENSG00000064886	CHI3L2	555.654	-5.45933	1.25854	-4.33783	1.44e-05	0.000965914
ENSG00000064932	SBNO2	963.867	-0.343297	0.571723	-0.60046	0.5482	0.866992
ENSG00000064933	PMS1	749.651	-0.331955	0.436393	-0.760678	0.446849	0.811481
ENSG00000064961	HMG20B	4690.83	-0.194393	0.323353	-0.601179	0.547721	0.866992
ENSG00000064989	CALCRL	3248.68	-0.615686	0.427967	-1.43863	0.150255	0.539601
ENSG00000064995	TAF11	1668.38	0.676762	0.41172	1.64374	0.100229	0.439296
ENSG00000064999	ANKS1A	658.058	-0.401234	0.433371	-0.925844	0.354527	0.756821
ENSG00000065000	AP3D1	3710.68	-0.0946399	0.522533	-0.181118	0.856275	0.966632
ENSG00000065029	ZNF76	1397.07	-0.528149	0.390274	-1.35328	0.175967	0.580754
ENSG00000065054	SLC9A3R2	1671.16	-3.40002	0.480316	-7.07871	1.46e-12	1.92e-09
ENSG00000065057	NTHL1	452.745	-1.0356	0.594635	-1.74157	0.0815828	0.391293
ENSG00000065060	UHRF1BP1	1197.38	0.271641	0.466939	0.581747	0.560737	0.872384
ENSG00000065135	GNAI3	13302.1	0.0238076	0.402435	0.0591589	0.952826	0.991529
ENSG00000065150	IPO5	6447.41	0.494951	0.323444	1.53025	0.125955	0.495266
ENSG00000065154	OAT	7784.94	-0.723118	0.343621	-2.10441	0.0353431	0.24172
ENSG00000065183	WDR3	1155.96	-0.469277	0.399375	-1.17503	0.239984	0.651655
ENSG00000065243	PKN2	2560.32	0.713206	0.368759	1.93407	0.0531046	0.310623
ENSG00000065268	WDR18	3081.23	-0.699632	0.476817	-1.4673	0.142296	0.526581
ENSG00000065308	TRAM2	921.685	-1.32279	0.348427	-3.79648	0.000146766	0.0053621
ENSG00000065320	NTN1	61.2027	-0.965344	0.933088	-1.03457	0.30087	0.710594
ENSG00000065325	GLP2R	2.43075	-1.22334	3.45592	-0.353982	0.723352	NA
ENSG00000065328	MCM10	817.674	-0.566011	0.608001	-0.930938	0.351886	0.754799
ENSG00000065357	DGKA	1290.97	0.215426	0.532077	0.404877	0.685568	0.919987
ENSG00000065361	ERBB3	1.18952	1.38371	3.43786	0.40249	0.687323	NA
ENSG00000065371	ROPN1	0.218251	0.885072	3.51015	0.252147	0.800928	NA
ENSG00000065413	ANKRD44	1056.5	-0.230971	0.475691	-0.485549	0.627287	0.899754
ENSG00000065427	KARS	11554.2	0.103118	0.349469	0.295071	0.767939	0.944886
ENSG00000065457	ADAT1	819.226	-0.769009	0.670703	-1.14657	0.251559	0.665029
ENSG00000065485	PDIA5	2107.58	-0.34623	0.369762	-0.93636	0.349088	0.752195
ENSG00000065491	TBC1D22B	1305.01	0.0933236	0.406395	0.229638	0.818373	0.957864
ENSG00000065518	NDUFB4	2449.67	0.119583	0.369926	0.323261	0.746498	0.939848
ENSG00000065526	SPEN	5130.2	0.339106	0.408544	0.830035	0.406519	0.787815
ENSG00000065534	MYLK	1272.28	-2.99992	0.794413	-3.77627	0.000159193	0.00574196
ENSG00000065548	ZC3H15	7553.36	0.343224	0.42713	0.803558	0.421652	0.796878
ENSG00000065559	MAP2K4	2301.9	-0.145548	0.639191	-0.227707	0.819874	0.958448
ENSG00000065600	TMEM206	1141.93	0.0644385	0.44586	0.144526	0.885085	0.973519
ENSG00000065609	SNAP91	0	NA	NA	NA	NA	NA
ENSG00000065613	SLK	7085.16	-0.193705	0.387451	-0.499947	0.617113	0.895269
ENSG00000065615	CYB5R4	4268.72	0.0717926	0.368601	0.19477	0.845573	0.964094
ENSG00000065618	COL17A1	460.517	-4.49729	1.38271	-3.25253	0.00114384	0.0245664
ENSG00000065621	GSTO2	254.982	0.550615	0.656298	0.838972	0.401485	0.784529
ENSG00000065665	SEC61A2	741.341	1.12143	0.590002	1.90072	0.0573392	0.325711
ENSG00000065675	PRKCQ	1211.46	0.80838	0.519564	1.55588	0.119737	0.479673
ENSG00000065717	TLE2	139.136	-5.68257	1.5319	-3.70949	0.000207674	0.00710253
ENSG00000065802	ASB1	701.358	0.0211539	0.449565	0.0470541	0.96247	0.99345
ENSG00000065809	FAM107B	6655.48	-1.36527	0.697802	-1.95653	0.0504024	0.300442
ENSG00000065833	ME1	427.208	-4.31517	0.987444	-4.37004	1.24e-05	0.000854118
ENSG00000065882	TBC1D1	3119.29	0.108037	0.471866	0.228956	0.818903	0.958048
ENSG00000065883	CDK13	4133.12	0.590176	0.377671	1.56267	0.11813	0.475447
ENSG00000065911	MTHFD2	3090.9	0.681165	0.51203	1.33032	0.183412	0.589886
ENSG00000065923	SLC9A7	1462.27	0.427013	0.570755	0.748155	0.454367	0.815201
ENSG00000065970	FOXJ2	1452.52	0.696448	0.578499	1.20389	0.228633	0.640467
ENSG00000065978	YBX1	7968.89	0.398221	0.316031	1.26007	0.207644	0.618996
ENSG00000065989	PDE4A	810.751	-0.820445	0.885573	-0.926456	0.354209	0.756761
ENSG00000066027	PPP2R5A	3012.71	0.162967	0.344208	0.473454	0.635889	0.902186
ENSG00000066032	CTNNA2	0.176905	-1.02255	3.51179	-0.291175	0.770917	NA
ENSG00000066044	ELAVL1	5677.14	-0.0486521	0.372789	-0.130508	0.896164	0.977194
ENSG00000066056	TIE1	1323.62	-1.79787	0.50896	-3.53244	0.000411745	0.0118336
ENSG00000066084	DIP2B	1327.69	0.458965	0.528048	0.869172	0.384753	0.775696
ENSG00000066117	SMARCD1	1636.28	0.378534	0.375318	1.00857	0.313182	0.724007
ENSG00000066135	KDM4A	393.085	0.813836	0.624732	1.3027	0.192678	0.603292
ENSG00000066136	NFYC	2199.21	-0.260098	0.380948	-0.682767	0.494754	0.83944
ENSG00000066185	ZMYND12	57.9828	-3.45651	1.60856	-2.14882	0.0316485	0.22574
ENSG00000066230	SLC9A3	61.674	0.96169	0.629704	1.52721	0.126709	0.496555
ENSG00000066248	NGEF	4.71776	0.308635	3.45138	0.0894239	0.928745	NA
ENSG00000066279	ASPM	539.478	-1.44806	0.6101	-2.37349	0.0176209	0.160233
ENSG00000066294	CD84	2618.48	-1.23427	0.333455	-3.70147	0.000214356	0.00725585
ENSG00000066322	ELOVL1	2706.3	-0.614655	0.46854	-1.31185	0.189571	0.599371
ENSG00000066336	SPI1	6623.25	-0.368027	0.490047	-0.751003	0.452651	0.814399
ENSG00000066379	ZNRD1	1045.69	0.468924	0.35082	1.33665	0.181337	0.58707
ENSG00000066382	MPPED2	114.629	-1.7115	0.662642	-2.58285	0.00979892	0.108964
ENSG00000066405	CLDN18	0	NA	NA	NA	NA	NA
ENSG00000066422	ZBTB11	1412.42	0.141356	0.489616	0.288708	0.772805	0.946473
ENSG00000066427	ATXN3	1400.48	0.159043	0.44826	0.3548	0.722739	0.931972
ENSG00000066455	GOLGA5	1988.81	-0.285174	0.523418	-0.54483	0.58587	0.88182
ENSG00000066468	FGFR2	55.2872	-3.35339	2.14509	-1.56329	0.117985	0.475251
ENSG00000066557	LRRC40	1619.12	0.0945612	0.505163	0.18719	0.851512	0.965398
ENSG00000066583	ISOC1	2506.62	-0.434784	0.388156	-1.12013	0.26266	0.675543
ENSG00000066629	EML1	147.066	-3.0797	1.38825	-2.2184	0.0265273	0.203365
ENSG00000066651	TRMT11	452.188	0.161886	0.427452	0.378723	0.704893	0.926784
ENSG00000066654	THUMPD1	3683.42	0.4044	0.407605	0.992136	0.321131	0.730033
ENSG00000066697	MSANTD3	2562.52	0.734049	0.432113	1.69874	0.0893677	0.410505
ENSG00000066735	KIF26A	50.9845	-5.03062	1.6217	-3.10207	0.00192175	0.0353667
ENSG00000066739	ATG2B	387.907	0.338817	0.616102	0.549936	0.582363	0.880747
ENSG00000066777	ARFGEF1	1875.84	0.530042	0.478686	1.10729	0.26817	0.680386
ENSG00000066813	ACSM2B	5.98226	-3.51236	3.39213	-1.03544	0.300462	NA
ENSG00000066827	ZFAT	357.81	0.283206	0.585873	0.483392	0.628818	0.900013
ENSG00000066855	MTFR1	509.237	-0.152311	0.579217	-0.262961	0.792581	0.952328
ENSG00000066923	STAG3	269.745	-0.379223	0.508795	-0.745335	0.456069	0.816332
ENSG00000066926	FECH	5194.5	-0.650888	0.608717	-1.06928	0.284944	0.696257
ENSG00000066933	MYO9A	698.186	-0.433259	0.618971	-0.699967	0.483948	0.833489
ENSG00000067048	DDX3Y	1858.84	0.152082	0.557574	0.272757	0.78504	0.950654
ENSG00000067057	PFKP	3337.03	0.445961	0.549183	0.812045	0.416766	0.793939
ENSG00000067064	IDI1	11107.7	0.193112	0.398197	0.484966	0.627701	0.899863
ENSG00000067066	SP100	7674.69	-0.0190929	0.35233	-0.0541903	0.956784	0.992221
ENSG00000067082	KLF6	52201.2	0.680225	0.701725	0.969361	0.332365	0.738913
ENSG00000067113	PLPP1	1110	-4.06708	0.81752	-4.9749	6.53e-07	8.92e-05
ENSG00000067141	NEO1	108.655	-2.23947	1.34745	-1.66201	0.0965113	0.429754
ENSG00000067167	TRAM1	27799.4	-0.279645	0.443028	-0.631214	0.527901	0.858439
ENSG00000067177	PHKA1	319.774	-0.326164	0.427513	-0.762933	0.445503	0.811377
ENSG00000067182	TNFRSF1A	16838	0.169568	0.351334	0.48264	0.629352	0.900196
ENSG00000067191	CACNB1	210.107	1.2047	0.817371	1.47387	0.140516	0.524111
ENSG00000067208	EVI5	180.746	-1.89765	0.620861	-3.05648	0.00223953	0.0397162
ENSG00000067221	STOML1	453.743	-0.138532	0.516482	-0.268223	0.788528	0.952078
ENSG00000067225	PKM	38834	-0.401253	0.416919	-0.962425	0.335836	0.741716
ENSG00000067248	DHX29	1937.44	0.120825	0.410382	0.29442	0.768437	0.945035
ENSG00000067334	DNTTIP2	11076.2	0.294288	0.46952	0.626786	0.5308	0.859646
ENSG00000067365	METTL22	1178.38	0.307104	0.417538	0.735513	0.462027	0.819668
ENSG00000067369	TP53BP1	1380.11	0.313527	0.36221	0.865596	0.386712	0.777176
ENSG00000067445	TRO	748.078	0.750305	0.52118	1.43963	0.149973	0.539174
ENSG00000067533	RRP15	558.767	-0.285048	0.514952	-0.553542	0.579892	0.879855
ENSG00000067560	RHOA	57481.5	-0.0240499	0.423231	-0.0568244	0.954685	0.991733
ENSG00000067596	DHX8	3348.26	0.17715	0.320802	0.55221	0.580805	0.880096
ENSG00000067601	PMS2P4	113.398	0.236359	0.533481	0.443051	0.657729	0.910381
ENSG00000067606	PRKCZ	395.009	0.320149	0.618739	0.517422	0.604861	0.890837
ENSG00000067646	ZFY	429.48	0.260053	0.781887	0.332597	0.739438	0.937423
ENSG00000067704	IARS2	2653.12	-0.244033	0.406169	-0.600816	0.547963	0.866992
ENSG00000067715	SYT1	52.339	-0.26824	1.30031	-0.20629	0.836564	0.962169
ENSG00000067798	NAV3	36.9969	-1.75727	1.95199	-0.900248	0.367988	0.764237
ENSG00000067829	IDH3G	3334.91	-0.29986	0.359833	-0.833331	0.404658	0.786518
ENSG00000067836	ROGDI	1743.43	-1.34296	0.474043	-2.83299	0.00461142	0.0661226
ENSG00000067840	PDZD4	100.387	-5.04889	1.07957	-4.67675	2.91e-06	0.000285717
ENSG00000067842	ATP2B3	0.693279	2.1806	3.47417	0.62766	0.530227	NA
ENSG00000067900	ROCK1	6803.28	0.117949	0.380121	0.310294	0.756338	0.942009
ENSG00000067955	CBFB	8063.6	0.0783442	0.336657	0.232713	0.815985	0.957833
ENSG00000067992	PDK3	1257.96	0.0112019	0.359836	0.0311307	0.975165	0.994267
ENSG00000068001	HYAL2	1759.09	-2.20784	0.74495	-2.96374	0.00303923	0.0490888
ENSG00000068024	HDAC4	500.101	-1.32162	0.530952	-2.48916	0.0128046	0.128954
ENSG00000068028	RASSF1	8687.39	0.138964	0.355954	0.390399	0.696241	0.924122
ENSG00000068078	FGFR3	352.323	-1.13573	1.07152	-1.05992	0.289181	0.700112
ENSG00000068079	IFI35	1159.44	-1.59432	0.586624	-2.71779	0.00657187	0.0842412
ENSG00000068097	HEATR6	857.916	0.150307	0.476997	0.31511	0.752678	0.941326
ENSG00000068120	COASY	3743.19	0.00498436	0.4139	0.0120424	0.990392	0.999035
ENSG00000068137	PLEKHH3	605.407	-2.37727	0.666712	-3.56565	0.000362949	0.0107592
ENSG00000068305	MEF2A	2772.08	-0.387474	0.420929	-0.920521	0.3573	0.758535
ENSG00000068308	OTUD5	6160.87	0.245191	0.451164	0.543464	0.586811	0.882436
ENSG00000068323	TFE3	4700.14	0.426571	0.42249	1.00966	0.312659	0.723703
ENSG00000068354	TBC1D25	1256.79	0.0805368	0.38793	0.207606	0.835536	0.962169
ENSG00000068366	ACSL4	1941.57	0.304012	0.526579	0.577334	0.563714	0.873926
ENSG00000068383	INPP5A	3716.68	0.59089	0.614167	0.962099	0.336	0.741889
ENSG00000068394	GPKOW	1567.45	0.228787	0.43202	0.529576	0.596406	0.887372
ENSG00000068400	GRIPAP1	1970.23	0.623386	0.498554	1.25039	0.211158	0.622459
ENSG00000068438	FTSJ1	1975.65	-0.150858	0.374978	-0.402313	0.687454	0.920322
ENSG00000068489	PRR11	516.715	-0.412861	0.430588	-0.958829	0.337645	0.742472
ENSG00000068615	REEP1	219.726	-5.80764	0.77136	-7.52909	5.11e-14	1.69e-10
ENSG00000068650	ATP11A	863.553	0.0974628	0.453539	0.214894	0.82985	0.960862
ENSG00000068654	POLR1A	378.371	-0.336647	0.7065	-0.4765	0.633718	0.901436
ENSG00000068697	LAPTM4A	35689.5	0.567799	0.437097	1.29902	0.193936	0.604584
ENSG00000068724	TTC7A	8325.59	1.09098	0.409872	2.66175	0.00777362	0.0942778
ENSG00000068745	IP6K2	5978.93	0.620511	0.346819	1.78915	0.0735909	0.370592
ENSG00000068781	STON1-GTF2A1L	0	NA	NA	NA	NA	NA
ENSG00000068784	SRBD1	878.93	-0.0455099	0.383123	-0.118786	0.905445	0.979226
ENSG00000068796	KIF2A	3334.93	-0.136552	0.364117	-0.375023	0.707643	0.928366
ENSG00000068831	RASGRP2	5340.98	-0.226288	0.400552	-0.564942	0.572113	0.876375
ENSG00000068878	PSME4	1511.66	0.351206	0.501253	0.700657	0.483517	0.833299
ENSG00000068885	IFT80	171.708	0.50055	0.525038	0.95336	0.340408	0.744588
ENSG00000068903	SIRT2	2697.31	-0.665393	0.392319	-1.69605	0.0898764	0.41195
ENSG00000068912	ERLEC1	4444.32	-0.189977	0.479167	-0.396473	0.691756	0.922683
ENSG00000068971	PPP2R5B	538.273	-1.55577	0.686615	-2.26585	0.0234605	0.189774
ENSG00000068976	PYGM	47.7442	-2.76353	0.907227	-3.04613	0.00231805	0.0405138
ENSG00000068985	PAGE1	0	NA	NA	NA	NA	NA
ENSG00000069011	PITX1	33.4599	-6.97078	2.03977	-3.41744	0.00063213	0.0158947
ENSG00000069018	TRPC7	0	NA	NA	NA	NA	NA
ENSG00000069020	MAST4	1842.98	0.057844	0.410785	0.140813	0.888017	0.97432
ENSG00000069122	ADGRF5	661.016	-2.36632	1.0657	-2.22043	0.0263895	0.203085
ENSG00000069188	SDK2	706.595	0.348508	0.645907	0.539563	0.589498	0.884084
ENSG00000069206	ADAM7	0.256777	0.756717	3.49745	0.216362	0.828705	NA
ENSG00000069248	NUP133	2068.74	-0.0893563	0.433875	-0.20595	0.83683	0.96225
ENSG00000069275	NUCKS1	2773.24	-0.0203535	0.407045	-0.050003	0.96012	0.993293
ENSG00000069329	VPS35	9403.44	-0.0126147	0.370915	-0.0340098	0.972869	0.994002
ENSG00000069345	DNAJA2	6026.5	0.677535	0.337172	2.00946	0.044488	0.277902
ENSG00000069399	BCL3	32594.9	0.614493	0.569141	1.07968	0.280283	0.69204
ENSG00000069424	KCNAB2	7047.92	-0.0314039	0.514865	-0.0609943	0.951364	0.991351
ENSG00000069431	ABCC9	94.5349	-5.66317	1.06291	-5.32801	9.93e-08	2.11e-05
ENSG00000069482	GAL	132.295	-0.925859	0.75777	-1.22182	0.221776	0.632394
ENSG00000069493	CLEC2D	366.829	-0.568474	0.61224	-0.928515	0.353141	0.756181
ENSG00000069509	FUNDC1	1104.95	0.546967	0.42965	1.27305	0.203	0.61286
ENSG00000069535	MAOB	141.045	-6.86095	3.3027	-2.07737	0.0377671	0.251116
ENSG00000069667	RORA	275.225	-2.19913	1.3838	-1.5892	0.112015	0.463558
ENSG00000069696	DRD4	13.0029	1.27281	1.56092	0.815423	0.41483	0.793055
ENSG00000069702	TGFBR3	887.192	-3.7595	0.929347	-4.04531	5.23e-05	0.00243463
ENSG00000069764	PLA2G10	0.854376	-1.05947	3.45945	-0.306252	0.759412	NA
ENSG00000069812	HES2	11.0441	-0.0360613	2.27664	-0.0158397	0.987362	NA
ENSG00000069849	ATP1B3	7688.48	0.0655917	0.42476	0.154421	0.877278	0.972316
ENSG00000069869	NEDD4	1313.25	0.205194	0.424772	0.483067	0.629048	0.900084
ENSG00000069943	PIGB	549.767	0.180697	0.410896	0.439764	0.660108	0.910681
ENSG00000069956	MAPK6	3683.73	-0.169953	0.487841	-0.348377	0.727557	0.932557
ENSG00000069966	GNB5	1212.61	-0.0735507	0.441003	-0.166781	0.867543	0.970241
ENSG00000069974	RAB27A	2919.84	-0.264412	0.447619	-0.590709	0.554716	0.870373
ENSG00000069998	HDHD5	2564.87	-0.658374	0.430919	-1.52784	0.126553	0.49614
ENSG00000070010	UFD1	2133.98	0.0775372	0.476423	0.162749	0.870716	0.970681
ENSG00000070018	LRP6	913.222	0.930571	0.382594	2.43227	0.0150046	0.143329
ENSG00000070019	GUCY2C	5.33784	-3.65278	3.38241	-1.07994	0.280171	NA
ENSG00000070031	SCT	13.886	0.175105	2.39511	0.0731096	0.941719	0.989542
ENSG00000070047	PHRF1	2926.85	-0.0293787	0.511036	-0.0574884	0.954156	0.991622
ENSG00000070061	ELP1	923.41	-0.738779	0.672296	-1.09889	0.271816	0.683904
ENSG00000070081	NUCB2	19651.9	-0.149621	0.395366	-0.378437	0.705106	0.926818
ENSG00000070087	PFN2	131.398	-1.69561	0.601283	-2.81999	0.00480248	0.0677995
ENSG00000070159	PTPN3	5.30346	-1.23586	3.45204	-0.358009	0.720336	NA
ENSG00000070182	SPTB	920.853	-0.653442	0.963087	-0.678487	0.497463	0.84137
ENSG00000070190	DAPP1	1227.75	-1.09379	0.756216	-1.4464	0.148066	0.535819
ENSG00000070193	FGF10	6.22463	0.946578	3.45144	0.274256	0.783888	NA
ENSG00000070214	SLC44A1	3910.74	-0.629236	0.523013	-1.2031	0.228939	0.640964
ENSG00000070269	TMEM260	575.183	0.278753	0.509854	0.546731	0.584563	0.881407
ENSG00000070366	SMG6	404.842	-0.175986	0.390693	-0.450446	0.652389	0.908298
ENSG00000070367	EXOC5	2890.34	-0.503736	0.480425	-1.04852	0.294398	0.704152
ENSG00000070371	CLTCL1	180.778	-0.890977	1.02274	-0.871171	0.383661	0.775547
ENSG00000070388	FGF22	0	NA	NA	NA	NA	NA
ENSG00000070404	FSTL3	481.28	0.243718	0.365759	0.666334	0.505198	0.844712
ENSG00000070413	DGCR2	3400.46	-0.383678	0.400648	-0.957643	0.338243	0.742806
ENSG00000070423	RNF126	7913.61	0.18115	0.381361	0.475009	0.634781	0.901822
ENSG00000070444	MNT	241.213	0.233146	0.65195	0.357614	0.720633	0.931338
ENSG00000070476	ZXDC	2918.33	0.261117	0.406109	0.642972	0.520242	0.853013
ENSG00000070495	JMJD6	4047.79	0.182056	0.410112	0.443917	0.657102	0.910151
ENSG00000070501	POLB	2659.67	1.00926	0.336014	3.00364	0.00266774	0.0447298
ENSG00000070526	ST6GALNAC1	89.9317	-3.07028	1.31429	-2.33609	0.0194868	0.170239
ENSG00000070540	WIPI1	695.214	-0.995359	0.989609	-1.00581	0.314507	0.724619
ENSG00000070601	FRMPD1	2.07488	0.931288	3.45687	0.269402	0.787621	NA
ENSG00000070610	GBA2	1248.27	-0.0393261	0.520724	-0.0755221	0.939799	0.98931
ENSG00000070614	NDST1	1379.15	-0.796094	0.490767	-1.62214	0.104773	0.44823
ENSG00000070669	ASNS	15.4594	-0.0459217	1.54743	-0.0296761	0.976325	0.994395
ENSG00000070718	AP3M2	1354.83	0.790146	0.41623	1.89834	0.0576511	0.326289
ENSG00000070729	CNGB1	0.554086	-1.89509	3.48185	-0.544277	0.586251	NA
ENSG00000070731	ST6GALNAC2	64.6468	-2.04017	0.941145	-2.16776	0.0301773	0.219857
ENSG00000070748	CHAT	0	NA	NA	NA	NA	NA
ENSG00000070756	PABPC1	52389.4	0.824659	0.367414	2.2445	0.0248005	0.196283
ENSG00000070759	TESK2	433.889	-0.628869	0.673172	-0.934189	0.350207	0.753391
ENSG00000070761	CFAP20	4140.6	1.00601	0.411218	2.44641	0.0144286	0.140125
ENSG00000070770	CSNK2A2	4445.09	0.394649	0.415924	0.948849	0.342698	0.74643
ENSG00000070778	PTPN21	33.7866	3.26092	1.96736	1.65751	0.0974157	0.431936
ENSG00000070785	EIF2B3	763.854	-0.957194	0.431169	-2.22	0.0264189	0.203085
ENSG00000070808	CAMK2A	13.501	1.88265	2.12176	0.887308	0.374913	0.768962
ENSG00000070814	TCOF1	1839.06	-0.480643	0.373487	-1.28691	0.198127	0.608249
ENSG00000070831	CDC42	17508.6	0.620945	0.417659	1.48673	0.137087	0.516413
ENSG00000070882	OSBPL3	1154.91	0.178238	0.558459	0.31916	0.749605	0.940191
ENSG00000070886	EPHA8	0	NA	NA	NA	NA	NA
ENSG00000070915	SLC12A3	0	NA	NA	NA	NA	NA
ENSG00000070950	RAD18	1323.26	-0.36934	0.426347	-0.86629	0.386331	0.776873
ENSG00000070961	ATP2B1	7947.6	0.0205514	0.52559	0.0391016	0.968809	0.993835
ENSG00000070985	TRPM5	0	NA	NA	NA	NA	NA
ENSG00000071051	NCK2	3998.06	-0.0674984	0.443845	-0.152077	0.879126	0.972687
ENSG00000071054	MAP4K4	5726.62	-0.213975	0.496794	-0.430711	0.666679	0.913612
ENSG00000071073	MGAT4A	2460.95	0.0373301	0.576441	0.0647597	0.948365	0.990692
ENSG00000071082	RPL31	32617.3	1.13681	0.467121	2.43366	0.0149472	0.143057
ENSG00000071127	WDR1	22700.8	-0.150108	0.387372	-0.387504	0.698383	0.924928
ENSG00000071189	SNX13	1221.27	0.189679	0.478649	0.396279	0.691899	0.922778
ENSG00000071203	MS4A12	0	NA	NA	NA	NA	NA
ENSG00000071205	ARHGAP10	399.913	-1.08802	0.775046	-1.40381	0.160374	0.557687
ENSG00000071242	RPS6KA2	753.622	-0.877679	0.466762	-1.88036	0.0600593	0.334033
ENSG00000071243	ING3	2591.66	0.675357	0.373458	1.80839	0.0705462	0.362619
ENSG00000071246	VASH1	172.05	-0.977826	0.562539	-1.73824	0.0821689	0.392832
ENSG00000071282	LMCD1	509.36	-2.1161	1.20608	-1.75452	0.0793412	0.385811
ENSG00000071462	BUD23	5095.34	0.0312916	0.420329	0.0744454	0.940656	0.989467
ENSG00000071537	SEL1L	3751.71	-0.818247	0.540719	-1.51326	0.130214	0.503711
ENSG00000071539	TRIP13	485.765	-0.986128	0.544622	-1.81067	0.0701926	0.361402
ENSG00000071553	ATP6AP1	14681.9	-0.0885802	0.427084	-0.207407	0.835692	0.962169
ENSG00000071564	TCF3	6250.64	0.1741	0.406732	0.428045	0.668619	0.913612
ENSG00000071575	TRIB2	2175.99	-0.941093	0.856151	-1.09921	0.271675	0.683746
ENSG00000071626	DAZAP1	1509.74	0.137456	0.429761	0.319844	0.749087	0.94001
ENSG00000071655	MBD3	1133.1	0.084835	0.493154	0.172025	0.863418	0.968864
ENSG00000071677	PRLH	0	NA	NA	NA	NA	NA
ENSG00000071794	HLTF	1568.13	-0.174965	0.635372	-0.275375	0.783028	0.950152
ENSG00000071859	FAM50A	1336.82	-0.871792	0.394444	-2.21018	0.0270929	0.205723
ENSG00000071889	FAM3A	1842.66	-0.370546	0.385706	-0.960697	0.336705	0.74213
ENSG00000071894	CPSF1	5823.78	0.0628231	0.633445	0.0991768	0.920998	0.984119
ENSG00000071909	MYO3B	2.38576	0.299169	3.40079	0.0879703	0.9299	NA
ENSG00000071967	CYBRD1	2880.74	-0.830288	0.361319	-2.29794	0.0215653	0.180378
ENSG00000071991	CDH19	3.01708	3.26951	3.41171	0.95832	0.337901	NA
ENSG00000071994	PDCD2	2799.07	-0.071773	0.431385	-0.166378	0.867859	0.970355
ENSG00000072041	SLC6A15	3.13967	-1.32901	3.45573	-0.384582	0.700547	NA
ENSG00000072042	RDH11	2304.97	-0.306497	0.354562	-0.86444	0.387346	0.777287
ENSG00000072062	PRKACA	442.575	-0.608219	0.583218	-1.04287	0.297009	0.706896
ENSG00000072071	ADGRL1	302.486	-0.0691146	0.41613	-0.166089	0.868087	0.970355
ENSG00000072080	SPP2	0	NA	NA	NA	NA	NA
ENSG00000072110	ACTN1	15352	-1.40688	0.411319	-3.42043	0.000625231	0.0158113
ENSG00000072121	ZFYVE26	379.627	-0.0622051	0.742407	-0.0837883	0.933225	0.98731
ENSG00000072133	RPS6KA6	22.4601	-2.14157	1.51266	-1.41576	0.156845	0.550974
ENSG00000072134	EPN2	147.062	-3.40023	0.708294	-4.8006	1.58e-06	0.000173068
ENSG00000072135	PTPN18	2480.19	-0.814172	0.524809	-1.55137	0.120813	0.483214
ENSG00000072163	LIMS2	267.544	-3.23863	0.747217	-4.33425	1.46e-05	0.000971861
ENSG00000072182	ASIC4	5.86248	-2.89863	3.4172	-0.848248	0.3963	NA
ENSG00000072195	SPEG	59.3667	-5.12695	1.61553	-3.17354	0.00150595	0.030122
ENSG00000072201	LNX1	108.889	-1.23245	0.503467	-2.44793	0.0143679	0.139673
ENSG00000072210	ALDH3A2	1090.8	-0.700791	0.383089	-1.82932	0.0673522	0.353487
ENSG00000072274	TFRC	14374.6	-0.0378372	0.684171	-0.0553036	0.955897	0.992103
ENSG00000072310	SREBF1	3647.58	-0.193793	0.478844	-0.40471	0.685691	0.919987
ENSG00000072315	TRPC5	3.44966	-1.40982	3.45468	-0.40809	0.683208	NA
ENSG00000072364	AFF4	2631.37	-0.054489	0.457444	-0.119116	0.905183	0.979226
ENSG00000072401	UBE2D1	4164.31	-0.364785	0.651931	-0.559545	0.57579	0.878114
ENSG00000072415	MPP5	619.781	0.182072	0.437556	0.41611	0.677329	0.916555
ENSG00000072422	RHOBTB1	610.284	-0.242226	0.446247	-0.542807	0.587263	0.882682
ENSG00000072501	SMC1A	2841.99	-0.322291	0.381105	-0.845675	0.397734	0.78278
ENSG00000072506	HSD17B10	2569.04	-0.112166	0.341895	-0.328071	0.742858	0.938786
ENSG00000072518	MARK2	3679.5	0.0167823	0.407688	0.0411646	0.967165	0.993773
ENSG00000072571	HMMR	480.375	-1.10429	0.735366	-1.50169	0.133178	0.508497
ENSG00000072609	CHFR	1898.46	-0.398637	0.554715	-0.718634	0.472367	0.825675
ENSG00000072657	TRHDE	1.64156	-0.297048	3.3954	-0.0874856	0.930286	NA
ENSG00000072682	P4HA2	290.032	-1.01955	0.884734	-1.15238	0.249164	0.662452
ENSG00000072694	FCGR2B	596.91	-4.02173	1.16199	-3.46109	0.000537999	0.0142617
ENSG00000072736	NFATC3	2603.6	-0.078734	0.446322	-0.176406	0.859975	0.967796
ENSG00000072756	TRNT1	1142.68	-0.101214	0.40187	-0.251859	0.80115	0.953591
ENSG00000072778	ACADVL	15111.4	-0.181909	0.391615	-0.464511	0.642282	0.904328
ENSG00000072786	STK10	5943.72	-0.33442	0.507615	-0.658806	0.51002	0.847623
ENSG00000072803	FBXW11	2621.19	0.126598	0.420196	0.301284	0.763198	0.943821
ENSG00000072818	ACAP1	5023.76	-0.300282	0.422747	-0.71031	0.477512	0.829008
ENSG00000072832	CRMP1	34.5631	-1.41712	1.72148	-0.823199	0.410395	0.790136
ENSG00000072840	EVC	69.5444	-2.47677	1.12435	-2.20284	0.027606	0.208249
ENSG00000072849	DERL2	4321.59	0.0615897	0.444923	0.138428	0.889902	0.974728
ENSG00000072858	SIDT1	475.962	-0.104449	0.475503	-0.21966	0.826136	0.960149
ENSG00000072864	NDE1	2473.39	0.277086	0.362115	0.765186	0.444161	0.810176
ENSG00000072952	MRVI1	116.553	-2.41854	1.63035	-1.48344	0.137957	0.518175
ENSG00000072954	TMEM38A	161.051	-3.39104	0.950024	-3.56943	0.000357762	0.0106532
ENSG00000072958	AP1M1	5403.33	-0.376087	0.362705	-1.0369	0.299784	0.710045
ENSG00000073008	PVR	752.262	-0.290428	0.484146	-0.599878	0.548588	0.867108
ENSG00000073050	XRCC1	757.287	-0.38775	0.486938	-0.796304	0.425856	0.799139
ENSG00000073060	SCARB1	1982.03	-0.674848	0.506337	-1.3328	0.182596	0.588888
ENSG00000073067	CYP2W1	2.00181	0.390952	3.3958	0.115128	0.908344	NA
ENSG00000073111	MCM2	7310.94	-0.0879025	0.412878	-0.212902	0.831403	0.961477
ENSG00000073146	MOV10L1	37.6146	4.74702	1.14053	4.16213	3.15e-05	0.00170584
ENSG00000073150	PANX2	333.305	1.60401	0.681591	2.35333	0.0186062	0.165516
ENSG00000073169	SELENOO	2021.65	0.443598	0.542879	0.817122	0.413859	0.791985
ENSG00000073282	TP63	17.3652	2.90958	2.39152	1.21662	0.223747	0.634036
ENSG00000073331	ALPK1	650.17	-0.201616	0.352448	-0.572045	0.567291	0.875029
ENSG00000073350	LLGL2	690.312	-0.833881	0.462705	-1.80219	0.0715156	0.365553
ENSG00000073417	PDE8A	380.12	-2.37841	0.826158	-2.87888	0.00399091	0.0593303
ENSG00000073464	CLCN4	270.684	-1.08312	0.690574	-1.56843	0.11678	0.472858
ENSG00000073536	NLE1	361.538	0.47682	0.684163	0.696939	0.485841	0.834363
ENSG00000073578	SDHA	9574.92	0.125828	0.381616	0.329724	0.741608	0.938479
ENSG00000073584	SMARCE1	615.72	0.499279	0.474833	1.05148	0.293037	0.7022
ENSG00000073598	FNDC8	2.43132	-1.56671	2.97292	-0.526995	0.598197	NA
ENSG00000073605	GSDMB	51.7464	1.19424	1.37215	0.870343	0.384113	0.775696
ENSG00000073614	KDM5A	6345.88	0.522972	0.429814	1.21674	0.223703	0.634036
ENSG00000073670	ADAM11	33.4822	1.17029	1.99164	0.5876	0.556801	0.870681
ENSG00000073711	PPP2R3A	194.499	-0.754523	0.638825	-1.18111	0.237559	0.650301
ENSG00000073712	FERMT2	331.353	-3.73108	0.643274	-5.80015	6.63e-09	2.08e-06
ENSG00000073734	ABCB11	1.11018	-2.38925	3.47215	-0.688117	0.491379	NA
ENSG00000073737	DHRS9	343.721	-2.17221	1.01181	-2.14686	0.0318044	0.22609
ENSG00000073754	CD5L	5564.95	-3.22688	0.864966	-3.73064	0.000190992	0.0066585
ENSG00000073756	PTGS2	5287.47	0.752492	0.660349	1.13954	0.254479	0.66716
ENSG00000073792	IGF2BP2	2060.06	0.151408	0.452406	0.334672	0.737872	0.936625
ENSG00000073803	MAP3K13	1213.76	0.560202	0.409849	1.36685	0.171673	0.573425
ENSG00000073849	ST6GAL1	3330.4	-2.30524	0.446511	-5.16278	2.43e-07	4.14e-05
ENSG00000073861	TBX21	243.887	-3.95101	0.989874	-3.99143	6.57e-05	0.00287094
ENSG00000073905	VDAC1P1	71.1076	-0.14156	0.568428	-0.249037	0.803332	0.954192
ENSG00000073910	FRY	497.87	0.546259	0.467107	1.16945	0.242222	0.653807
ENSG00000073921	PICALM	3250.98	-0.109374	0.436186	-0.250752	0.802006	0.953891
ENSG00000073969	NSF	1097.54	-0.671326	0.574083	-1.16939	0.242247	0.653807
ENSG00000074047	GLI2	1.8836	-2.47516	3.44902	-0.717641	0.472979	NA
ENSG00000074054	CLASP1	1005.32	-0.198368	0.439387	-0.451466	0.651654	0.908096
ENSG00000074071	MRPS34	2360.56	-0.514072	0.326314	-1.57539	0.115166	0.470017
ENSG00000074181	NOTCH3	2080.83	-2.86578	0.847385	-3.38191	0.000719845	0.017533
ENSG00000074201	CLNS1A	2537.15	-0.122479	0.354734	-0.345271	0.729891	0.932892
ENSG00000074211	PPP2R2C	0.574788	-2.17795	3.47897	-0.626035	0.531292	NA
ENSG00000074219	TEAD2	103.997	-5.53227	1.28872	-4.29284	1.76e-05	0.00111601
ENSG00000074266	EED	848.089	-0.367186	0.434426	-0.845222	0.397987	0.78278
ENSG00000074276	CDHR2	11.1628	1.71262	2.23866	0.765021	0.444259	0.810281
ENSG00000074317	SNCB	0	NA	NA	NA	NA	NA
ENSG00000074319	TSG101	5529.81	0.192637	0.443584	0.434275	0.664089	0.912297
ENSG00000074356	NCBP3	1763	0.364138	0.45294	0.803943	0.42143	0.79673
ENSG00000074370	ATP2A3	8268.77	-0.500664	0.47276	-1.05902	0.289589	0.700488
ENSG00000074410	CA12	9.72301	-1.24084	3.45051	-0.35961	0.719139	NA
ENSG00000074416	MGLL	3298.59	-1.40738	0.559686	-2.51459	0.0119172	0.123876
ENSG00000074527	NTN4	262.068	-6.05304	1.05703	-5.72644	1.03e-08	3.03e-06
ENSG00000074582	BCS1L	716.064	-0.91958	0.54793	-1.67828	0.0932922	0.421045
ENSG00000074590	NUAK1	65.8001	-1.10426	1.42891	-0.7728	0.439641	0.806744
ENSG00000074603	DPP8	2586.83	-0.0599923	0.364226	-0.164712	0.869171	0.97041
ENSG00000074621	SLC24A1	127.661	0.404691	0.828692	0.488349	0.625303	0.899153
ENSG00000074657	ZNF532	175.006	-0.839175	0.6675	-1.25719	0.208685	0.619918
ENSG00000074660	SCARF1	4134.39	0.152116	0.425717	0.357318	0.720854	0.931343
ENSG00000074695	LMAN1	5591.86	-0.399754	0.388447	-1.02911	0.303429	0.713177
ENSG00000074696	HACD3	4042.94	-0.4552	0.459012	-0.991696	0.321346	0.730033
ENSG00000074706	IPCEF1	95.0867	-2.48842	0.961034	-2.58931	0.00961679	0.107832
ENSG00000074755	ZZEF1	805.739	-0.0774717	0.470109	-0.164795	0.869105	0.97041
ENSG00000074771	NOX3	0.876846	-0.246612	3.46682	-0.0711349	0.94329	NA
ENSG00000074800	ENO1	117359	0.258952	0.432269	0.599053	0.549138	0.867356
ENSG00000074803	SLC12A1	0.20598	0.847058	3.51013	0.241318	0.809309	NA
ENSG00000074842	MYDGF	9074.11	-0.619892	0.501481	-1.23612	0.216413	0.626991
ENSG00000074855	ANO8	32.4127	0.194218	1.28225	0.151466	0.879608	0.97288
ENSG00000074935	TUBE1	438.287	0.318624	0.484438	0.657719	0.510719	0.847856
ENSG00000074964	ARHGEF10L	144.175	-7.52655	1.24228	-6.05865	1.37e-09	5.66e-07
ENSG00000074966	TXK	89.7782	-1.98267	1.1993	-1.65319	0.098293	0.434367
ENSG00000075035	WSCD2	6.01399	-3.6632	3.38166	-1.08326	0.278695	NA
ENSG00000075043	KCNQ2	725.3	1.37305	1.01333	1.35499	0.175422	0.579533
ENSG00000075073	TACR2	17.0368	2.63267	1.60845	1.63678	0.101677	0.443119
ENSG00000075089	ACTR6	1348.62	0.291683	0.439747	0.663297	0.50714	0.845558
ENSG00000075131	TIPIN	437.236	-1.01081	0.533631	-1.89421	0.0581972	0.328045
ENSG00000075142	SRI	6282.24	0.153149	0.371985	0.411708	0.680553	0.918068
ENSG00000075151	EIF4G3	1939.63	0.106936	0.421188	0.253892	0.799579	0.953468
ENSG00000075188	NUP37	934.889	-0.0999488	0.531058	-0.188207	0.850714	0.965065
ENSG00000075213	SEMA3A	252.281	-4.26829	1.48368	-2.87684	0.00401685	0.0595372
ENSG00000075218	GTSE1	334.54	-0.706231	0.616056	-1.14638	0.25164	0.665089
ENSG00000075223	SEMA3C	278.691	0.579432	0.954969	0.606755	0.544014	0.86552
ENSG00000075234	TTC38	1949.95	-0.30609	0.371193	-0.824611	0.409592	0.789752
ENSG00000075239	ACAT1	1744.21	-0.677525	0.389026	-1.7416	0.0815792	0.391293
ENSG00000075240	GRAMD4	4903.35	0.834532	0.509501	1.63794	0.101434	0.442715
ENSG00000075275	CELSR1	55.2876	-1.39798	1.23074	-1.13589	0.256004	0.668642
ENSG00000075290	WNT8B	0	NA	NA	NA	NA	NA
ENSG00000075292	ZNF638	2534.89	-0.0603845	0.402312	-0.150094	0.880691	0.973134
ENSG00000075303	SLC25A40	1027.39	0.0041589	0.42614	0.00975947	0.992213	0.999035
ENSG00000075336	TIMM21	1018.31	-0.528807	0.484003	-1.09257	0.274583	0.686786
ENSG00000075340	ADD2	1163.68	-1.51838	0.84718	-1.79227	0.073089	0.369585
ENSG00000075388	FGF4	0.617941	1.26567	3.49338	0.362306	0.717124	NA
ENSG00000075391	RASAL2	158.215	-2.3677	1.0929	-2.16643	0.0302781	0.220267
ENSG00000075399	VPS9D1	328.896	0.252062	0.439994	0.572876	0.566728	0.874811
ENSG00000075407	ZNF37A	592.169	-0.653064	0.715382	-0.912889	0.361301	0.75981
ENSG00000075413	MARK3	4805	0.0672851	0.366117	0.18378	0.854186	0.96621
ENSG00000075415	SLC25A3	17923.2	0.445233	0.327951	1.35762	0.174585	0.578129
ENSG00000075420	FNDC3B	2941.6	-0.415265	0.396962	-1.04611	0.295512	0.705368
ENSG00000075426	FOSL2	33777.5	0.794728	0.637092	1.24743	0.21224	0.623089
ENSG00000075429	CACNG5	0.27665	0.812924	3.50226	0.232114	0.816449	NA
ENSG00000075461	CACNG4	0	NA	NA	NA	NA	NA
ENSG00000075539	FRYL	981.035	0.525288	0.354889	1.48015	0.138834	0.520464
ENSG00000075568	TMEM131	1386.69	-0.142382	0.389026	-0.365998	0.714367	0.930103
ENSG00000075618	FSCN1	5036.81	-0.19753	0.426133	-0.46354	0.642978	0.90437
ENSG00000075624	ACTB	384746	-0.609056	0.324138	-1.879	0.0602443	0.33448
ENSG00000075643	MOCOS	12.7486	-2.4449	1.67047	-1.4636	0.143304	0.529027
ENSG00000075651	PLD1	2309.53	0.732508	0.348555	2.10155	0.0355924	0.242533
ENSG00000075673	ATP12A	7.59751	1.11106	3.04494	0.364888	0.715195	NA
ENSG00000075702	WDR62	562.889	-0.311037	0.447011	-0.695816	0.486544	0.834593
ENSG00000075711	DLG1	1706.02	-0.124118	0.416228	-0.298197	0.765552	0.944162
ENSG00000075785	RAB7A	15717.6	0.115079	0.354929	0.324232	0.745763	0.939512
ENSG00000075790	BCAP29	2644.66	0.12629	0.490567	0.257436	0.796842	0.953361
ENSG00000075826	SEC31B	588.815	0.00295072	0.489813	0.00602416	0.995193	0.99919
ENSG00000075856	SART3	2465.18	0.121119	0.386135	0.313671	0.753771	0.941377
ENSG00000075884	ARHGAP15	6511.91	0.24745	0.369854	0.669049	0.503464	0.84381
ENSG00000075886	TUBA3D	18.008	1.91979	1.2081	1.5891	0.112039	0.463558
ENSG00000075891	PAX2	0.447244	-0.793955	3.4904	-0.227468	0.820059	NA
ENSG00000075914	EXOSC7	977.505	-0.0349676	0.365781	-0.095597	0.923841	0.98453
ENSG00000075945	KIFAP3	1198.7	0.210132	0.616416	0.340893	0.733185	0.933513
ENSG00000075975	MKRN2	4020.18	-0.204843	0.377938	-0.542003	0.587817	0.883085
ENSG00000076003	MCM6	3555.4	0.18281	0.447717	0.408316	0.683041	0.919107
ENSG00000076043	REXO2	1431.91	0.0312205	0.553499	0.0564058	0.955019	0.991733
ENSG00000076053	RBM7	4086.97	0.35159	0.419025	0.839069	0.401431	0.784529
ENSG00000076067	RBMS2	1011.42	0.689209	0.486926	1.41543	0.156943	0.551077
ENSG00000076108	BAZ2A	4683.26	0.49669	0.401816	1.23611	0.216417	0.626991
ENSG00000076201	PTPN23	401.586	0.288623	0.46075	0.626419	0.53104	0.859895
ENSG00000076242	MLH1	1439.39	-0.209889	0.400893	-0.523555	0.600588	0.889313
ENSG00000076248	UNG	2394.92	-0.627146	0.53354	-1.17544	0.239817	0.651655
ENSG00000076258	FMO4	99.7948	-6.39721	1.29681	-4.93304	8.1e-07	0.000104781
ENSG00000076321	KLHL20	1201.03	0.205303	0.359229	0.571511	0.567654	0.875029
ENSG00000076344	RGS11	12.4536	-1.44395	2.74325	-0.526364	0.598635	0.887932
ENSG00000076351	SLC46A1	62.1662	-4.63409	1.12782	-4.1089	3.98e-05	0.0020348
ENSG00000076356	PLXNA2	160.256	-4.96498	0.9809	-5.06166	4.16e-07	6.28e-05
ENSG00000076382	SPAG5	935.987	-0.409124	0.69011	-0.592839	0.553289	0.869928
ENSG00000076513	ANKRD13A	3078.79	-0.0654094	0.361975	-0.180701	0.856602	0.966632
ENSG00000076554	TPD52	2190.44	-0.144064	0.404335	-0.356299	0.721617	0.931478
ENSG00000076555	ACACB	227.465	-0.969129	0.661421	-1.46522	0.14286	0.528079
ENSG00000076604	TRAF4	897.663	0.333607	0.545912	0.6111	0.541133	0.864744
ENSG00000076641	PAG1	1633.7	-1.37908	0.535807	-2.57383	0.0100579	0.110832
ENSG00000076650	GPATCH1	347.116	-0.169579	0.600189	-0.282543	0.777527	0.948264
ENSG00000076662	ICAM3	989.095	0.0441024	0.447054	0.0986511	0.921415	0.984135
ENSG00000076685	NT5C2	4233.6	0.476443	0.416613	1.14361	0.252786	0.665823
ENSG00000076706	MCAM	2277.7	-3.15502	1.07458	-2.93605	0.0033242	0.0523495
ENSG00000076716	GPC4	105.483	-4.16164	3.32974	-1.24984	0.211358	0.622494
ENSG00000076770	MBNL3	642.245	0.0962513	0.45783	0.210234	0.833485	0.96194
ENSG00000076826	CAMSAP3	129.754	-2.31061	0.979112	-2.3599	0.0182797	0.164087
ENSG00000076864	RAP1GAP	64.2397	1.48409	1.68461	0.880967	0.378336	0.770999
ENSG00000076924	XAB2	1396.81	0.378413	0.423916	0.892661	0.372039	0.767865
ENSG00000076928	ARHGEF1	10126.6	-0.241165	0.417389	-0.577794	0.563403	0.873786
ENSG00000076944	STXBP2	2432.78	-0.420978	0.391729	-1.07467	0.282525	0.693845
ENSG00000076984	MAP2K7	252.749	-0.00312554	0.399638	-0.00782093	0.99376	0.99919
ENSG00000077009	NMRK2	3.63908	-1.51692	3.40281	-0.445785	0.655752	NA
ENSG00000077044	DGKD	2132.98	-0.168762	0.615026	-0.274399	0.783778	0.95048
ENSG00000077063	CTTNBP2	7.51353	-3.70977	2.52595	-1.46867	0.141923	NA
ENSG00000077080	ACTL6B	0.176905	-1.02255	3.51179	-0.291175	0.770917	NA
ENSG00000077092	RARB	61.4963	-4.4742	1.35046	-3.3131	0.000922676	0.0209768
ENSG00000077097	TOP2B	7279.03	0.00731937	0.458172	0.0159752	0.987254	0.997989
ENSG00000077147	TM9SF3	15477.5	0.313111	0.390157	0.802525	0.422249	0.796878
ENSG00000077150	NFKB2	3672.93	0.215298	0.652569	0.329924	0.741458	0.938479
ENSG00000077152	UBE2T	738.536	-0.565211	0.621345	-0.909657	0.363003	0.760995
ENSG00000077157	PPP1R12B	445.461	0.333054	0.415584	0.801411	0.422894	0.797613
ENSG00000077232	DNAJC10	2915.1	-0.554305	0.48204	-1.14992	0.250179	0.663298
ENSG00000077235	GTF3C1	1875.67	-0.0719693	0.463141	-0.155394	0.876511	0.972144
ENSG00000077238	IL4R	2515.78	-0.487103	0.593541	-0.820673	0.411833	0.790617
ENSG00000077254	USP33	2577.17	0.0968828	0.524061	0.184869	0.853331	0.966088
ENSG00000077264	PAK3	15.0525	-2.22814	2.42014	-0.920663	0.357226	0.758535
ENSG00000077274	CAPN6	0	NA	NA	NA	NA	NA
ENSG00000077279	DCX	0	NA	NA	NA	NA	NA
ENSG00000077312	SNRPA	2912.44	-0.151386	0.345706	-0.437903	0.661456	0.911315
ENSG00000077327	SPAG6	492.263	-0.232458	0.771557	-0.301284	0.763198	0.943821
ENSG00000077348	EXOSC5	896.893	-0.71804	0.573523	-1.25198	0.210576	0.621891
ENSG00000077380	DYNC1I2	1712.8	0.10359	0.391078	0.264882	0.7911	0.952078
ENSG00000077420	APBB1IP	2511.57	-0.0261381	0.427604	-0.0611268	0.951258	0.991351
ENSG00000077454	LRCH4	1544.44	0.289016	0.375118	0.770468	0.441023	0.807608
ENSG00000077458	FAM76B	2958.79	0.769465	0.36721	2.09544	0.0361321	0.245028
ENSG00000077463	SIRT6	90.7129	-0.198014	0.506514	-0.390936	0.695845	0.924093
ENSG00000077498	TYR	0	NA	NA	NA	NA	NA
ENSG00000077514	POLD3	1242.68	0.180337	0.487843	0.369662	0.711635	0.929919
ENSG00000077522	ACTN2	3.76176	-0.207608	3.39618	-0.0611297	0.951256	NA
ENSG00000077549	CAPZB	8154.25	-0.300158	0.337004	-0.890667	0.373108	0.768277
ENSG00000077585	GPR137B	865.543	-1.04177	0.719245	-1.44843	0.147497	0.535172
ENSG00000077616	NAALAD2	208.214	-3.02001	0.71874	-4.20181	2.65e-05	0.00151104
ENSG00000077684	JADE1	3688.3	0.360104	0.410846	0.876493	0.380762	0.772684
ENSG00000077713	SLC25A43	396.3	-0.594675	0.494534	-1.2025	0.229171	0.641057
ENSG00000077721	UBE2A	5735.55	0.351488	0.383125	0.917424	0.35892	0.758535
ENSG00000077782	FGFR1	3306.12	-0.328457	0.576542	-0.569702	0.56888	0.875137
ENSG00000077800	FKBP6	11.4918	-0.0828161	1.43125	-0.0578627	0.953858	0.991622
ENSG00000077935	SMC1B	93.6913	-0.770633	0.846937	-0.909906	0.362872	0.760944
ENSG00000077942	FBLN1	1274.69	-2.73345	0.689557	-3.96407	7.37e-05	0.00315137
ENSG00000077943	ITGA8	55.1857	-3.59913	1.89473	-1.89955	0.0574922	0.326206
ENSG00000077984	CST7	8707.57	-1.70475	0.64641	-2.63726	0.00835775	0.0985121
ENSG00000078018	MAP2	53.5348	-2.97512	1.81255	-1.6414	0.100714	0.440544
ENSG00000078043	PIAS2	2474.44	0.369886	0.435467	0.8494	0.395659	0.781418
ENSG00000078053	AMPH	98.9555	-1.40603	1.26493	-1.11155	0.266333	0.678848
ENSG00000078061	ARAF	6685.46	0.326355	0.410236	0.795531	0.426305	0.799169
ENSG00000078070	MCCC1	2300.39	0.128851	0.578785	0.222624	0.823828	0.959787
ENSG00000078081	LAMP3	15.8253	-2.78615	2.11485	-1.31742	0.187697	0.596195
ENSG00000078098	FAP	34.7085	-6.3069	2.15836	-2.92207	0.00347709	0.0542152
ENSG00000078114	NEBL	15.9065	-1.83007	2.49777	-0.732681	0.463753	0.820298
ENSG00000078124	ACER3	1324.75	0.41183	0.631	0.652663	0.513974	0.850623
ENSG00000078140	UBE2K	3069.5	0.430256	0.364619	1.18001	0.237994	0.650679
ENSG00000078142	PIK3C3	1384.15	0.146999	0.430189	0.341709	0.73257	0.933409
ENSG00000078177	N4BP2	3089.54	0.564252	0.512241	1.10153	0.270664	0.682682
ENSG00000078237	TIGAR	647.74	-0.37784	0.697599	-0.541629	0.588074	0.883401
ENSG00000078246	TULP3	504.848	0.236727	0.69832	0.338995	0.734614	0.934269
ENSG00000078269	SYNJ2	2584.41	0.645738	0.429585	1.50317	0.132796	0.508139
ENSG00000078295	ADCY2	47.5221	-3.21101	1.46623	-2.18997	0.0285265	0.212406
ENSG00000078304	PPP2R5C	4208.64	-0.165974	0.508372	-0.32648	0.744061	0.939031
ENSG00000078319	PMS2P1	1269.12	0.46507	0.426467	1.09052	0.275485	0.687479
ENSG00000078328	RBFOX1	1.11977	-2.22683	3.41968	-0.651179	0.514931	NA
ENSG00000078369	GNB1	20746.5	0.277292	0.47289	0.586378	0.557622	0.870949
ENSG00000078399	HOXA9	3376.41	1.56144	0.43809	3.56419	0.000364987	0.0107712
ENSG00000078401	EDN1	132.197	-0.750912	1.42844	-0.525686	0.599106	0.888186
ENSG00000078403	MLLT10	1153.17	0.277581	0.447921	0.61971	0.535449	0.861794
ENSG00000078487	ZCWPW1	148.307	-0.431786	0.56394	-0.76566	0.443878	0.80996
ENSG00000078549	ADCYAP1R1	0	NA	NA	NA	NA	NA
ENSG00000078579	FGF20	5.32103	0.594249	3.45097	0.172198	0.863282	NA
ENSG00000078589	P2RY10	227.282	-0.256035	0.830364	-0.308341	0.757823	0.942501
ENSG00000078596	ITM2A	16865.8	0.789165	0.45684	1.72744	0.084088	0.398971
ENSG00000078618	NRDC	5415.66	-0.51154	0.455138	-1.12392	0.261046	0.673925
ENSG00000078668	VDAC3	5762.1	0.116209	0.383321	0.303163	0.761766	0.943821
ENSG00000078674	PCM1	5251.69	0.160707	0.49731	0.323152	0.74658	0.939848
ENSG00000078687	TNRC6C	344.312	0.132749	0.851356	0.155926	0.876091	0.972144
ENSG00000078699	CBFA2T2	938.873	0.516875	0.57383	0.900746	0.367723	0.764193
ENSG00000078725	BRINP1	12.3747	-1.24213	3.45011	-0.360026	0.718828	0.930867
ENSG00000078747	ITCH	2375.36	0.467093	0.399414	1.16945	0.242224	0.653807
ENSG00000078795	PKD2L2	26.4791	-0.989532	1.03793	-0.953372	0.340402	0.744588
ENSG00000078804	TP53INP2	695.171	-0.933578	0.524269	-1.78072	0.0749576	0.374731
ENSG00000078808	SDF4	10427.7	-0.413989	0.422455	-0.979959	0.327106	0.735562
ENSG00000078814	MYH7B	12.939	-0.757741	1.4741	-0.514036	0.607227	0.891548
ENSG00000078898	BPIFB2	0	NA	NA	NA	NA	NA
ENSG00000078900	TP73	59.7253	-6.85845	1.72105	-3.98504	6.75e-05	0.00291703
ENSG00000078902	TOLLIP	4425.42	-0.0667655	0.399828	-0.166986	0.867381	0.97017
ENSG00000078967	UBE2D4	415.715	-0.482776	0.451647	-1.06892	0.285105	0.696305
ENSG00000079101	CLUL1	3.66125	-0.279627	3.38148	-0.0826936	0.934095	NA
ENSG00000079102	RUNX1T1	16.6051	-4.12173	3.10539	-1.32728	0.184415	0.591764
ENSG00000079112	CDH17	0	NA	NA	NA	NA	NA
ENSG00000079134	THOC1	1472.73	0.110666	0.46451	0.238242	0.811693	0.956384
ENSG00000079150	FKBP7	311.218	-1.50592	0.592686	-2.54084	0.0110588	0.118307
ENSG00000079156	OSBPL6	51.2138	0.961045	1.2901	0.744936	0.456311	0.816429
ENSG00000079215	SLC1A3	641.853	-4.15545	0.645522	-6.43735	1.22e-10	7.3e-08
ENSG00000079246	XRCC5	18593.6	0.268415	0.358022	0.749716	0.453426	0.814471
ENSG00000079257	LXN	1051.78	-0.469632	0.508094	-0.924303	0.355329	0.757079
ENSG00000079263	SP140	66.0344	-2.35401	0.903183	-2.60635	0.00915124	0.104626
ENSG00000079277	MKNK1	1328.11	-0.361203	0.539213	-0.66987	0.502941	0.843735
ENSG00000079308	TNS1	1519.87	-1.03773	0.648328	-1.60062	0.109461	0.458366
ENSG00000079313	REXO1	1656.26	0.196972	0.387122	0.508812	0.610884	0.893388
ENSG00000079332	SAR1A	6885.74	0.0894015	0.439587	0.203376	0.838841	0.962718
ENSG00000079335	CDC14A	1905.06	0.88947	0.397042	2.24024	0.0250754	0.1978
ENSG00000079337	RAPGEF3	296.487	-2.61285	0.696848	-3.74953	0.000177168	0.00625362
ENSG00000079385	CEACAM1	1137.34	-3.72675	0.90409	-4.1221	3.75e-05	0.00195127
ENSG00000079387	SENP1	1290.6	-0.107838	0.522271	-0.206479	0.836417	0.962169
ENSG00000079393	DUSP13	17.1739	-4.28623	3.0871	-1.38844	0.165005	0.564257
ENSG00000079432	CIC	1166.69	0.442991	0.504625	0.87786	0.380019	0.772498
ENSG00000079435	LIPE	121.797	-1.99203	0.687982	-2.89547	0.00378596	0.0576161
ENSG00000079459	FDFT1	13275.3	0.326812	0.432264	0.756049	0.44962	0.813242
ENSG00000079462	PAFAH1B3	691.55	-0.343064	0.519655	-0.660176	0.509141	0.847207
ENSG00000079482	OPHN1	86.0151	-0.925338	0.752421	-1.22981	0.218766	0.62947
ENSG00000079557	AFM	0	NA	NA	NA	NA	NA
ENSG00000079616	KIF22	4388.94	-0.228185	0.445783	-0.511874	0.608739	0.892078
ENSG00000079689	SCGN	2.24262	-1.31968	3.45844	-0.381583	0.702771	NA
ENSG00000079691	CARMIL1	206.613	-0.195541	0.830127	-0.235555	0.813778	0.95694
ENSG00000079739	PGM1	2691.92	-0.0701169	0.398164	-0.1761	0.860215	0.967796
ENSG00000079785	DDX1	6342.88	0.0241101	0.41215	0.0584983	0.953352	0.991622
ENSG00000079805	DNM2	11405.3	0.132742	0.362264	0.366423	0.714049	0.930054
ENSG00000079819	EPB41L2	1524.39	-0.602331	0.582193	-1.03459	0.30086	0.710594
ENSG00000079841	RIMS1	22.4846	-1.90875	2.20666	-0.864996	0.387041	0.777287
ENSG00000079931	MOXD1	62.0196	-3.48498	1.69681	-2.05385	0.0399907	0.260115
ENSG00000079950	STX7	1868.02	-0.535136	0.389102	-1.37531	0.169035	0.570664
ENSG00000079974	RABL2B	726.869	-0.465898	0.511902	-0.910132	0.362753	0.760855
ENSG00000079999	KEAP1	4751.36	-0.0118801	0.404525	-0.029368	0.976571	0.994395
ENSG00000080007	DDX43	49.2937	-2.62851	1.06169	-2.47579	0.0132942	0.132385
ENSG00000080031	PTPRH	8.76255	-0.16566	3.11885	-0.0531157	0.95764	NA
ENSG00000080166	DCT	1.20038	1.02026	3.46191	0.294709	0.768216	NA
ENSG00000080189	SLC35C2	2781.44	-0.134878	0.329303	-0.409587	0.682109	0.918726
ENSG00000080200	CRYBG3	295.302	-2.75329	0.556975	-4.94328	7.68e-07	0.00010141
ENSG00000080224	EPHA6	0	NA	NA	NA	NA	NA
ENSG00000080293	SCTR	0.220978	-1.05707	3.5133	-0.300876	0.763509	NA
ENSG00000080298	RFX3	394.222	0.183706	0.424404	0.432857	0.665119	0.912666
ENSG00000080345	RIF1	4240.86	-0.120247	0.402646	-0.298643	0.765213	0.944011
ENSG00000080371	RAB21	7912.9	0.0784325	0.382083	0.205276	0.837356	0.962426
ENSG00000080493	SLC4A4	72.138	-4.10938	1.19066	-3.45134	0.000557811	0.0145722
ENSG00000080503	SMARCA2	6923.16	0.178278	0.428732	0.415827	0.677536	0.916555
ENSG00000080511	RDH8	0.654753	0.989981	3.47208	0.285126	0.775547	NA
ENSG00000080546	SESN1	3755.22	0.313322	0.376523	0.832144	0.405328	0.786965
ENSG00000080561	MID2	121.156	-1.78688	1.20302	-1.48532	0.137459	0.517028
ENSG00000080572	PIH1D3	0.442263	-1.29368	3.48887	-0.3708	0.710786	NA
ENSG00000080573	COL5A3	50.7531	-5.06549	2.04855	-2.47272	0.0134088	0.13316
ENSG00000080603	SRCAP	275.449	0.122627	0.436014	0.281245	0.778523	0.948754
ENSG00000080608	PUM3	1815	-0.0638538	0.381248	-0.167486	0.866987	0.970014
ENSG00000080618	CPB2	9.38792	2.50798	2.23348	1.1229	0.26148	NA
ENSG00000080644	CHRNA3	3.22744	-3.78768	3.4372	-1.10197	0.270475	NA
ENSG00000080709	KCNN2	1.28698	-0.390788	3.40141	-0.11489	0.908532	NA
ENSG00000080802	CNOT4	1796.83	0.406035	0.401517	1.01125	0.311896	0.722745
ENSG00000080815	PSEN1	3343.63	0.0337908	0.495447	0.0682027	0.945624	0.990125
ENSG00000080819	CPOX	1210.1	-1.42183	0.631755	-2.2506	0.0244106	0.194441
ENSG00000080822	CLDND1	3694.46	0.102127	0.40869	0.249889	0.802673	0.954177
ENSG00000080823	MOK	166.795	0.00541309	0.860994	0.00628702	0.994984	0.99919
ENSG00000080824	HSP90AA1	26169.5	0.204849	0.316046	0.648163	0.51688	0.851317
ENSG00000080839	RBL1	647.96	-0.840451	0.510095	-1.64764	0.0994275	0.437039
ENSG00000080845	DLGAP4	1507.9	-0.174424	0.587492	-0.296896	0.766546	0.944617
ENSG00000080854	IGSF9B	9.18223	-3.49926	3.41409	-1.02495	0.305389	NA
ENSG00000080910	CFHR2	0	NA	NA	NA	NA	NA
ENSG00000080947	CROCCP3	78.5831	0.580469	0.845137	0.686834	0.492187	0.837886
ENSG00000080986	NDC80	1037.78	-0.206318	0.653281	-0.315819	0.75214	0.941054
ENSG00000081014	AP4E1	675.46	0.806348	0.429833	1.87596	0.0606615	0.335381
ENSG00000081019	RSBN1	2869.35	0.389472	0.43898	0.887221	0.37496	0.768962
ENSG00000081026	MAGI3	270.844	0.19655	0.620052	0.316989	0.751252	0.940615
ENSG00000081041	CXCL2	10013.3	-0.446731	0.554219	-0.806054	0.420212	0.795825
ENSG00000081051	AFP	0	NA	NA	NA	NA	NA
ENSG00000081052	COL4A4	96.3335	-5.25328	1.78164	-2.94857	0.00319245	0.0508993
ENSG00000081059	TCF7	1265.81	0.475721	0.847182	0.561534	0.574433	0.877551
ENSG00000081087	OSTM1	1453.31	-1.9446	0.584617	-3.32628	0.000880125	0.020289
ENSG00000081138	CDH7	4.05011	2.41783	3.35205	0.721299	0.470726	NA
ENSG00000081148	IMPG2	2.44133	-3.02765	3.42516	-0.883946	0.376725	NA
ENSG00000081154	PCNP	18427.8	0.805819	0.372099	2.1656	0.0303415	0.220572
ENSG00000081177	EXD2	1052.25	-0.105913	0.474139	-0.22338	0.82324	0.9597
ENSG00000081181	ARG2	223.216	0.621674	0.570433	1.08983	0.275789	0.687631
ENSG00000081189	MEF2C	4604.65	0.245454	0.480737	0.510579	0.609646	0.892981
ENSG00000081237	PTPRC	16202.2	0.410783	0.635533	0.646359	0.518047	0.851669
ENSG00000081248	CACNA1S	0	NA	NA	NA	NA	NA
ENSG00000081277	PKP1	2.61901	1.04182	3.45489	0.30155	0.762995	NA
ENSG00000081307	UBA5	1710.53	-0.224754	0.390352	-0.575772	0.564769	0.874294
ENSG00000081320	STK17B	22212.2	1.13206	0.525838	2.15286	0.0313294	0.22494
ENSG00000081377	CDC14B	369.475	-2.75935	0.902254	-3.05829	0.00222605	0.0395338
ENSG00000081386	ZNF510	280.837	0.717373	0.686956	1.04428	0.296356	0.706111
ENSG00000081479	LRP2	0.27665	0.812924	3.50226	0.232114	0.816449	NA
ENSG00000081665	ZNF506	1228.57	0.566398	0.442865	1.27894	0.200918	0.610774
ENSG00000081692	JMJD4	373.217	0.61348	0.624331	0.982619	0.325795	0.734457
ENSG00000081721	DUSP12	1457.14	-0.0266464	0.39298	-0.067806	0.94594	0.990238
ENSG00000081760	AACS	814.717	0.0369746	0.460824	0.0802357	0.93605	0.987989
ENSG00000081791	DELE1	1903.07	-0.10816	0.38269	-0.28263	0.777461	0.948264
ENSG00000081800	SLC13A1	0	NA	NA	NA	NA	NA
ENSG00000081803	CADPS2	133.026	-2.90544	1.23938	-2.34427	0.0190645	0.168009
ENSG00000081818	PCDHB4	50.3285	-5.27595	2.51799	-2.0953	0.0361442	0.245028
ENSG00000081842	PCDHA6	0	NA	NA	NA	NA	NA
ENSG00000081853	PCDHGA2	0	NA	NA	NA	NA	NA
ENSG00000081870	HSPB11	1188.43	-0.0804963	0.336627	-0.239126	0.811008	0.956375
ENSG00000081913	PHLPP1	564.792	0.341867	0.652439	0.523983	0.600291	0.889125
ENSG00000081923	ATP8B1	106.628	-2.9249	0.762554	-3.83567	0.000125222	0.00475941
ENSG00000081985	IL12RB2	473.654	-0.14158	0.506923	-0.279293	0.78002	0.948944
ENSG00000082014	SMARCD3	2084.34	-0.21283	0.504436	-0.421916	0.673086	0.915704
ENSG00000082068	WDR70	994.833	-0.334773	0.373359	-0.896652	0.369905	0.765487
ENSG00000082074	FYB1	2991.37	-2.14693	0.691278	-3.10574	0.00189804	0.0350607
ENSG00000082126	MPP4	0.112131	-0.730268	3.52502	-0.207167	0.83588	NA
ENSG00000082146	STRADB	2885.76	-0.291861	0.607462	-0.480459	0.630901	0.900598
ENSG00000082153	BZW1	27747.3	0.336537	0.400962	0.839325	0.401287	0.784529
ENSG00000082175	PGR	10.3815	-4.03052	2.20261	-1.82989	0.0672669	NA
ENSG00000082196	C1QTNF3	25.5946	-0.346697	0.810838	-0.427578	0.668958	0.913612
ENSG00000082212	ME2	2937.82	-0.729071	0.391566	-1.86194	0.0626122	0.34015
ENSG00000082213	C5orf22	1506.02	-0.323538	0.447155	-0.723547	0.469344	0.824314
ENSG00000082258	CCNT2	2474.12	0.453814	0.370229	1.22576	0.220288	0.630822
ENSG00000082269	FAM135A	808.07	-0.0597364	0.387235	-0.154264	0.877402	0.972316
ENSG00000082293	COL19A1	3.79242	-0.476654	3.40602	-0.139945	0.888704	NA
ENSG00000082397	EPB41L3	857.758	-3.79367	1.43434	-2.64489	0.00817167	0.0970698
ENSG00000082438	COBLL1	1187	-0.888804	0.635641	-1.39828	0.162029	0.559771
ENSG00000082458	DLG3	139.083	-2.18292	1.08823	-2.00593	0.0448639	0.279633
ENSG00000082482	KCNK2	3.75389	-0.986196	3.45267	-0.285633	0.775159	NA
ENSG00000082497	SERTAD4	45.3308	-7.95384	1.93647	-4.1074	4e-05	0.00203801
ENSG00000082512	TRAF5	1848.38	0.943208	0.691878	1.36326	0.172801	0.57527
ENSG00000082515	MRPL22	2297.24	0.28555	0.651591	0.438236	0.661215	0.911315
ENSG00000082516	GEMIN5	521.862	-1.03446	0.641959	-1.61141	0.107089	0.454379
ENSG00000082556	OPRK1	42.7344	2.09624	1.40254	1.4946	0.135019	0.512388
ENSG00000082641	NFE2L1	1835.66	0.0134439	0.464677	0.0289316	0.976919	0.994395
ENSG00000082684	SEMA5B	17.8175	-6.47953	2.38637	-2.71522	0.00662313	0.0844502
ENSG00000082701	GSK3B	2175.97	0.0368403	0.390717	0.0942889	0.92488	0.984851
ENSG00000082781	ITGB5	2731.58	-3.23613	0.783885	-4.12833	3.65e-05	0.00191427
ENSG00000082805	ERC1	1574.98	0.327062	0.376238	0.869295	0.384686	0.775696
ENSG00000082898	XPO1	2438.31	-0.126945	0.476379	-0.26648	0.78987	0.952078
ENSG00000082929	LINC01587	4.36521	0.867837	3.4519	0.251408	0.801498	NA
ENSG00000082996	RNF13	3185.75	-0.498468	0.477493	-1.04393	0.296519	0.706154
ENSG00000083067	TRPM3	0.439228	-0.0720918	3.47235	-0.0207617	0.983436	NA
ENSG00000083093	PALB2	665.722	-0.700142	0.659727	-1.06126	0.288572	0.700112
ENSG00000083097	DOPEY1	212.736	0.964502	0.545801	1.76713	0.077206	0.38135
ENSG00000083099	LYRM2	2403.05	0.114873	0.362632	0.316777	0.751413	0.940668
ENSG00000083123	BCKDHB	1152.45	-0.0644065	0.539132	-0.119463	0.904908	0.979226
ENSG00000083168	KAT6A	3588.99	0.809733	0.374419	2.16264	0.0305691	0.221895
ENSG00000083223	TUT7	1872.37	0.177165	0.346522	0.511267	0.609164	0.8925
ENSG00000083290	ULK2	599.879	-0.933185	0.609693	-1.53058	0.125873	0.495188
ENSG00000083307	GRHL2	0	NA	NA	NA	NA	NA
ENSG00000083312	TNPO1	4126.07	-0.0278138	0.349527	-0.0795756	0.936575	0.988128
ENSG00000083444	PLOD1	1810.92	-1.77949	0.572718	-3.1071	0.00188934	0.0349978
ENSG00000083454	P2RX5	160.434	-1.24319	0.726618	-1.71092	0.0870959	0.405043
ENSG00000083457	ITGAE	2992.3	0.197321	0.538251	0.366597	0.713919	0.930041
ENSG00000083520	DIS3	3921.78	0.206869	0.368304	0.561681	0.574333	0.877551
ENSG00000083535	PIBF1	1225.36	0.0939391	0.496421	0.189233	0.84991	0.965059
ENSG00000083544	TDRD3	399.334	0.0039157	0.454072	0.00862353	0.99312	0.999073
ENSG00000083622	AC000061.1	0	NA	NA	NA	NA	NA
ENSG00000083635	NUFIP1	981.622	-0.337358	0.683063	-0.49389	0.621384	0.897297
ENSG00000083642	PDS5B	3717.67	0.338726	0.476252	0.711231	0.476941	0.828745
ENSG00000083720	OXCT1	1392.16	-0.225136	0.399472	-0.563583	0.573038	0.877084
ENSG00000083750	RRAGB	839.253	-0.115596	0.519923	-0.222333	0.824055	0.959787
ENSG00000083782	EPYC	1.78898	-0.856478	3.45977	-0.247554	0.80448	NA
ENSG00000083799	CYLD	9189.51	0.247988	0.39097	0.634291	0.525891	0.857721
ENSG00000083807	SLC27A5	157.201	0.261575	0.444652	0.588268	0.556352	0.870681
ENSG00000083812	ZNF324	1079.19	-0.161463	0.5293	-0.30505	0.760328	0.943821
ENSG00000083814	ZNF671	1528.95	0.312265	0.342261	0.91236	0.361579	0.759842
ENSG00000083817	ZNF416	639.501	0.675453	0.416297	1.62253	0.104691	0.448152
ENSG00000083828	ZNF586	1677.72	0.551307	0.439169	1.25534	0.209355	0.620751
ENSG00000083838	ZNF446	138.009	-0.670408	0.577524	-1.16083	0.24571	0.657838
ENSG00000083844	ZNF264	618.091	0.375713	0.413872	0.9078	0.363984	0.761582
ENSG00000083845	RPS5	27251	0.978323	0.447431	2.18653	0.0287765	0.213741
ENSG00000083857	FAT1	49.344	-8.96863	2.57925	-3.47722	0.000506636	0.0136868
ENSG00000083896	YTHDC1	1431.05	-0.0629552	0.377469	-0.166783	0.867541	0.970241
ENSG00000083937	CHMP2B	7508.87	0.421415	0.461391	0.913359	0.361054	0.759755
ENSG00000084070	SMAP2	11025.2	0.0607141	0.608248	0.099818	0.920489	0.984113
ENSG00000084072	PPIE	1796.52	-0.0662642	0.37079	-0.178711	0.858165	0.967346
ENSG00000084073	ZMPSTE24	3561.46	0.0127043	0.359675	0.0353215	0.971823	0.993901
ENSG00000084090	STARD7	11627.2	-0.189775	0.318185	-0.596428	0.550889	0.868509
ENSG00000084092	NOA1	1454.87	0.175225	0.411693	0.425621	0.670384	0.91449
ENSG00000084093	REST	7057.12	0.0617167	0.4254	0.145079	0.884648	0.973519
ENSG00000084110	HAL	135.935	0.581552	0.882256	0.659164	0.50979	0.847435
ENSG00000084112	SSH1	1423.36	-0.0801019	0.512711	-0.156232	0.87585	0.972144
ENSG00000084207	GSTP1	18765.7	-0.110158	0.438414	-0.251264	0.80161	0.953738
ENSG00000084234	APLP2	28728.7	-0.159981	0.363935	-0.439585	0.660237	0.910681
ENSG00000084444	FAM234B	232.56	-0.0305789	0.703668	-0.0434565	0.965338	0.993773
ENSG00000084453	SLCO1A2	0	NA	NA	NA	NA	NA
ENSG00000084463	WBP11	13952.1	0.521602	0.35514	1.46872	0.141908	0.525934
ENSG00000084623	EIF3I	11556.3	0.499386	0.405395	1.23185	0.218006	0.628651
ENSG00000084628	NKAIN1	1.85751	-1.39213	3.45959	-0.402397	0.687392	NA
ENSG00000084636	COL16A1	330.696	-2.54009	1.10923	-2.28996	0.0220237	0.182888
ENSG00000084652	TXLNA	3757.7	-0.269131	0.463812	-0.580259	0.56174	0.87278
ENSG00000084674	APOB	62.6667	-6.29389	1.50243	-4.18914	2.8e-05	0.00157522
ENSG00000084676	NCOA1	3911.4	0.263507	0.473106	0.556973	0.577546	0.878607
ENSG00000084693	AGBL5	1829.32	0.372728	0.428135	0.870584	0.383981	0.775696
ENSG00000084710	EFR3B	22.5051	0.150003	1.77954	0.0842931	0.932823	0.98731
ENSG00000084731	KIF3C	173.47	0.0645353	0.959711	0.0672445	0.946387	0.990314
ENSG00000084733	RAB10	7211.04	-0.454413	0.37311	-1.21791	0.223259	0.63365
ENSG00000084734	GCKR	9.14588	-2.42293	2.75707	-0.878809	0.379505	NA
ENSG00000084754	HADHA	12403.2	-0.119087	0.334424	-0.356095	0.72177	0.931478
ENSG00000084764	MAPRE3	303.804	0.0896974	0.451819	0.198525	0.842634	0.964086
ENSG00000084774	CAD	1276.44	-0.873604	0.624734	-1.39836	0.162005	0.559771
ENSG00000085063	CD59	8231.14	-0.233041	0.555079	-0.419833	0.674607	0.915938
ENSG00000085117	CD82	23068.9	0.00424265	0.470201	0.00902306	0.992801	0.999035
ENSG00000085185	BCORL1	401.364	-0.438924	0.70662	-0.62116	0.534495	0.861423
ENSG00000085224	ATRX	3534.84	-0.25695	0.574615	-0.447168	0.654754	0.909262
ENSG00000085231	AK6	1384.91	-0.213431	0.427588	-0.499152	0.617673	0.895399
ENSG00000085265	FCN1	6685.24	-2.96776	0.866651	-3.4244	0.000616156	0.015706
ENSG00000085274	MYNN	1594.44	0.333663	0.401068	0.831937	0.405445	0.786965
ENSG00000085276	MECOM	152.736	-2.31942	1.1325	-2.04806	0.0405543	0.262522
ENSG00000085365	SCAMP1	2440.94	-0.210957	0.335931	-0.627978	0.530018	0.859408
ENSG00000085377	PREP	1957.41	-0.0339062	0.349798	-0.0969307	0.922781	0.98453
ENSG00000085382	HACE1	608.497	-0.505029	0.476602	-1.05965	0.289306	0.700261
ENSG00000085415	SEH1L	3125.52	0.0913465	0.391893	0.233091	0.815691	0.957793
ENSG00000085433	WDR47	1368.6	0.318172	0.461761	0.689042	0.490797	0.837459
ENSG00000085449	WDFY1	4289.35	-0.240377	0.403202	-0.59617	0.551062	0.868509
ENSG00000085465	OVGP1	48.9968	-0.795044	1.81663	-0.437647	0.661642	0.911369
ENSG00000085491	SLC25A24	1853.78	-0.302637	0.355452	-0.851414	0.394539	0.78072
ENSG00000085511	MAP3K4	636.41	-0.439652	0.505166	-0.870313	0.384129	0.775696
ENSG00000085514	PILRA	557.852	-1.90752	0.639649	-2.98214	0.00286243	0.0473137
ENSG00000085552	IGSF9	39.0097	-1.69263	1.49018	-1.13586	0.256017	0.668642
ENSG00000085563	ABCB1	1456.41	1.1864	0.531294	2.23304	0.0255464	0.200107
ENSG00000085644	ZNF213	259.244	-0.55075	0.577768	-0.953237	0.34047	0.744642
ENSG00000085662	AKR1B1	5533.15	-0.379323	0.488915	-0.775846	0.43784	0.805819
ENSG00000085719	CPNE3	5007.69	0.0388861	0.388278	0.10015	0.920225	0.984032
ENSG00000085721	RRN3	5283.7	0.404151	0.551047	0.733424	0.4633	0.819862
ENSG00000085733	CTTN	306.781	-2.96007	0.598356	-4.94701	7.54e-07	0.000100832
ENSG00000085741	WNT11	223.26	-2.08882	0.941491	-2.21863	0.0265117	0.203337
ENSG00000085760	MTIF2	839.436	-0.115255	0.357128	-0.322727	0.746902	0.939857
ENSG00000085788	DDHD2	2577.54	0.688694	0.445947	1.54434	0.122506	0.487764
ENSG00000085831	TTC39A	90.9357	-0.19524	0.716026	-0.272672	0.785106	0.950654
ENSG00000085832	EPS15	4654.52	0.0584746	0.399181	0.146486	0.883537	0.973519
ENSG00000085840	ORC1	918.463	0.116646	0.657686	0.177358	0.859227	0.967739
ENSG00000085871	MGST2	1228.81	-0.243261	0.378709	-0.642342	0.520651	0.85326
ENSG00000085872	CHERP	2410.43	-0.231031	0.468295	-0.493346	0.621768	0.897437
ENSG00000085978	ATG16L1	1614.9	0.846914	0.455604	1.85888	0.0630435	0.341151
ENSG00000085982	USP40	376.245	-0.920001	0.645963	-1.42423	0.154379	0.545799
ENSG00000085998	POMGNT1	1259.46	-1.02502	0.570541	-1.79657	0.0724036	0.367544
ENSG00000085999	RAD54L	240.579	-0.660274	0.979446	-0.674129	0.500229	0.842159
ENSG00000086015	MAST2	662.49	0.240199	0.480124	0.500285	0.616874	0.895028
ENSG00000086061	DNAJA1	13351.8	0.14493	0.321187	0.451232	0.651822	0.908202
ENSG00000086062	B4GALT1	1536.73	0.200332	0.382373	0.523918	0.600336	0.889125
ENSG00000086065	CHMP5	2622.2	-0.353835	0.396709	-0.891925	0.372433	0.768216
ENSG00000086102	NFX1	3137.01	0.210306	0.416237	0.505257	0.613379	0.894238
ENSG00000086159	AQP6	0	NA	NA	NA	NA	NA
ENSG00000086189	DIMT1	2651.91	-0.138749	0.396761	-0.349704	0.72656	0.932557
ENSG00000086200	IPO11	1240.58	-0.807849	0.429946	-1.87895	0.0602509	0.33448
ENSG00000086205	FOLH1	52.8143	-2.68709	1.3947	-1.92665	0.0540232	0.313899
ENSG00000086232	EIF2AK1	11757.7	0.0771228	0.488503	0.157876	0.874555	0.971749
ENSG00000086288	NME8	22.1135	-0.176218	1.2914	-0.136455	0.891461	0.975719
ENSG00000086289	EPDR1	1897.17	-0.917514	0.694145	-1.32179	0.186238	0.593746
ENSG00000086300	SNX10	3083.7	-0.396067	0.336195	-1.17808	0.238763	0.650933
ENSG00000086475	SEPHS1	2925.97	0.26828	0.404007	0.664049	0.506659	0.845448
ENSG00000086504	MRPL28	2704.81	0.0354512	0.404688	0.0876012	0.930194	0.986406
ENSG00000086506	HBQ1	251.158	-0.753995	0.838342	-0.899389	0.368446	0.764237
ENSG00000086544	ITPKC	1585.02	-0.212187	0.365556	-0.580449	0.561612	0.87278
ENSG00000086548	CEACAM6	2448.61	-3.68172	1.24038	-2.96821	0.00299541	0.0486588
ENSG00000086570	FAT2	1.54684	-1.21071	3.45991	-0.349925	0.726395	NA
ENSG00000086589	RBM22	4841.65	0.153499	0.359943	0.426453	0.669777	0.914244
ENSG00000086598	TMED2	29571.8	0.173154	0.360021	0.480954	0.630549	0.900486
ENSG00000086619	ERO1B	1675.48	0.36441	0.410761	0.887158	0.374994	0.768962
ENSG00000086666	ZFAND6	10074.4	0.0986032	0.412672	0.238938	0.811153	0.956375
ENSG00000086696	HSD17B2	0.256777	0.756717	3.49745	0.216362	0.828705	NA
ENSG00000086712	TXLNG	1140.26	-0.144592	0.438447	-0.329782	0.741565	0.938479
ENSG00000086717	PPEF1	0	NA	NA	NA	NA	NA
ENSG00000086730	LAT2	8650.34	0.170811	0.523247	0.326445	0.744088	0.939031
ENSG00000086758	HUWE1	1935.09	0.0119384	0.445664	0.0267879	0.978629	0.994618
ENSG00000086827	ZW10	806.041	-0.0934354	0.488275	-0.191358	0.848245	0.964761
ENSG00000086848	ALG9	59.218	-0.704733	0.577129	-1.2211	0.222047	0.632446
ENSG00000086967	MYBPC2	8.71102	-5.04051	2.93723	-1.71608	0.0861481	NA
ENSG00000086991	NOX4	3.20946	-2.51956	3.43788	-0.732882	0.46363	NA
ENSG00000087008	ACOX3	497.951	-0.0124968	0.481393	-0.0259596	0.97929	0.994938
ENSG00000087053	MTMR2	2628.63	0.0904005	0.403936	0.223799	0.822914	0.9597
ENSG00000087074	PPP1R15A	37474	0.394808	0.502847	0.785146	0.432368	0.803006
ENSG00000087076	HSD17B14	309.073	-1.17308	0.829412	-1.41435	0.157259	0.551547
ENSG00000087077	TRIP6	3256.84	0.492298	0.437056	1.1264	0.259998	0.672739
ENSG00000087085	ACHE	355.383	-0.558157	1.1572	-0.482336	0.629567	0.900196
ENSG00000087086	FTL	363606	-0.164718	0.618061	-0.266507	0.789849	0.952078
ENSG00000087087	SRRT	8497.46	0.215245	0.40627	0.529808	0.596245	0.887241
ENSG00000087088	BAX	2958	0.291522	0.336795	0.865579	0.386721	0.777176
ENSG00000087095	NLK	296.226	-0.173226	0.504965	-0.343046	0.731564	0.933409
ENSG00000087111	PIGS	3974.39	0.195988	0.343036	0.571332	0.567775	0.875029
ENSG00000087116	ADAMTS2	463.883	-5.80031	1.09555	-5.29442	1.19e-07	2.46e-05
ENSG00000087128	TMPRSS11E	0	NA	NA	NA	NA	NA
ENSG00000087152	ATXN7L3	1084.49	0.456334	0.461086	0.989694	0.322324	0.730783
ENSG00000087157	PGS1	4377.02	0.251781	0.402781	0.625106	0.531902	0.860249
ENSG00000087191	PSMC5	4390.57	-0.001776	0.317477	-0.00559412	0.995537	0.99919
ENSG00000087206	UIMC1	2626.8	0.401056	0.373581	1.07355	0.283027	0.694227
ENSG00000087237	CETP	1199.8	-2.17984	0.80805	-2.69766	0.00698295	0.0872406
ENSG00000087245	MMP2	6108.68	-0.888314	0.687409	-1.29226	0.196266	0.606507
ENSG00000087250	MT3	0.513555	0.810814	3.4746	0.233355	0.815486	NA
ENSG00000087253	LPCAT2	3573.63	-0.390852	0.551627	-0.708545	0.478607	0.830111
ENSG00000087258	GNAO1	14.871	-5.28453	1.6427	-3.21698	0.00129547	0.0268495
ENSG00000087263	OGFOD1	2209.41	-0.165045	0.495053	-0.333388	0.738841	0.937288
ENSG00000087266	SH3BP2	2629.16	-0.218506	0.538768	-0.405566	0.685062	0.919987
ENSG00000087269	NOP14	1482.17	0.28002	0.342017	0.818732	0.412939	0.791503
ENSG00000087274	ADD1	9548.32	-0.0516532	0.442819	-0.116646	0.90714	0.979429
ENSG00000087299	L2HGDH	266.283	-0.0631479	0.534948	-0.118045	0.906032	0.979226
ENSG00000087301	TXNDC16	603.363	-1.35414	1.05308	-1.28588	0.198484	0.608607
ENSG00000087302	RTRAF	7508.08	0.457366	0.392161	1.16627	0.243504	0.655233
ENSG00000087303	NID2	237.72	-1.19241	0.861239	-1.38453	0.166197	0.566156
ENSG00000087338	GMCL1	1283.27	0.273513	0.554738	0.493048	0.621979	0.897437
ENSG00000087365	SF3B2	11149.3	0.0142556	0.347814	0.0409862	0.967307	0.993773
ENSG00000087448	KLHL42	767.432	0.157171	0.481658	0.326312	0.744189	0.939031
ENSG00000087460	GNAS	55074	0.147588	0.325687	0.45316	0.650433	0.907662
ENSG00000087470	DNM1L	3538.4	0.168497	0.479165	0.351648	0.725102	0.932557
ENSG00000087494	PTHLH	6.05118	0.376682	3.30846	0.113854	0.909354	NA
ENSG00000087495	PHACTR3	3.60724	-0.434749	3.39026	-0.128235	0.897963	NA
ENSG00000087502	ERGIC2	2141.13	-0.368896	0.354248	-1.04135	0.297714	0.707723
ENSG00000087510	TFAP2C	7.44086	-1.89141	2.62677	-0.720052	0.471493	NA
ENSG00000087586	AURKA	645.193	-0.295654	0.945572	-0.312672	0.75453	0.941467
ENSG00000087589	CASS4	589.709	-1.06865	0.585357	-1.82563	0.0679059	0.354852
ENSG00000087842	PIR	202.794	-1.02339	1.08193	-0.945897	0.344201	0.747939
ENSG00000087884	AAMDC	96.6253	0.181604	0.520789	0.34871	0.727307	0.932557
ENSG00000087903	RFX2	2758.2	-0.111269	0.480572	-0.231535	0.816899	0.957833
ENSG00000087995	METTL2A	567.931	-0.0771286	0.464658	-0.16599	0.868165	0.970355
ENSG00000088002	SULT2B1	14.5047	1.18564	1.75759	0.674579	0.499943	0.842159
ENSG00000088035	ALG6	598.353	-0.987571	0.4968	-1.98786	0.0468267	0.287969
ENSG00000088038	CNOT3	1355.43	0.16516	0.354858	0.465426	0.641626	0.903983
ENSG00000088053	GP6	317.506	-3.04753	0.9244	-3.29677	0.000978037	0.022008
ENSG00000088179	PTPN4	799.389	0.515765	0.339611	1.51869	0.128839	0.501464
ENSG00000088205	DDX18	3420.39	0.233229	0.331236	0.704117	0.48136	0.831771
ENSG00000088247	KHSRP	3692.86	0.158206	0.464903	0.340299	0.733632	0.933777
ENSG00000088256	GNA11	617.593	-0.37474	0.535428	-0.69989	0.483996	0.833489
ENSG00000088280	ASAP3	92.7995	-2.55853	1.25925	-2.03179	0.0421746	0.268794
ENSG00000088298	EDEM2	3527.48	-0.288559	0.538565	-0.535792	0.592102	0.885292
ENSG00000088305	DNMT3B	848.26	0.174516	0.691865	0.25224	0.800856	0.953591
ENSG00000088320	REM1	7.45299	-3.89284	3.37049	-1.15498	0.248099	NA
ENSG00000088325	TPX2	2255.94	-0.153907	0.542045	-0.283938	0.776458	0.947861
ENSG00000088340	FER1L4	37.5574	-0.215269	1.49391	-0.144098	0.885423	0.973519
ENSG00000088356	PDRG1	3912.12	0.660761	0.445492	1.48322	0.138017	0.518289
ENSG00000088367	EPB41L1	126.607	-3.8115	0.784955	-4.8557	1.2e-06	0.00013892
ENSG00000088386	SLC15A1	0	NA	NA	NA	NA	NA
ENSG00000088387	DOCK9	116.803	-3.68625	1.01567	-3.62938	0.000284101	0.00886905
ENSG00000088448	ANKRD10	3803.63	0.507344	0.333317	1.5221	0.127983	0.499767
ENSG00000088451	TGDS	1108.92	0.504519	0.494077	1.02113	0.307191	0.717334
ENSG00000088538	DOCK3	330.407	0.417224	0.641333	0.650558	0.515332	0.851007
ENSG00000088543	C3orf18	216.377	-4.18969	1.31642	-3.18263	0.00145941	0.0293394
ENSG00000088682	COQ9	901.668	-0.10225	0.52507	-0.194736	0.845599	0.964094
ENSG00000088726	TMEM40	188.941	-3.27913	1.0028	-3.26997	0.00107559	0.0236164
ENSG00000088727	KIF9	743.726	0.741572	0.540863	1.37109	0.170347	0.572171
ENSG00000088756	ARHGAP28	56.1879	-2.59323	3.25196	-0.797436	0.425198	0.79884
ENSG00000088766	CRLS1	2727.66	-0.326332	0.328383	-0.993753	0.320343	0.729717
ENSG00000088782	DEFB127	0	NA	NA	NA	NA	NA
ENSG00000088808	PPP1R13B	154.068	-5.91549	1.43505	-4.12214	3.75e-05	0.00195127
ENSG00000088812	ATRN	1173.18	-0.241192	0.508597	-0.47423	0.635336	0.902094
ENSG00000088826	SMOX	13532.3	1.06613	0.600278	1.77606	0.0757223	0.377499
ENSG00000088827	SIGLEC1	812.999	-3.38516	1.07104	-3.16063	0.00157429	0.031019
ENSG00000088832	FKBP1A	4509.97	-0.136367	0.338732	-0.402582	0.687256	0.920322
ENSG00000088833	NSFL1C	5891.79	0.128408	0.340022	0.377647	0.705693	0.927249
ENSG00000088836	SLC4A11	288.803	-0.947125	1.26779	-0.747069	0.455022	0.815637
ENSG00000088854	C20orf194	425.967	0.0333219	0.570941	0.0583631	0.953459	0.991622
ENSG00000088876	ZNF343	194.408	-0.256295	0.915293	-0.280014	0.779467	0.948819
ENSG00000088881	EBF4	292.906	-0.266662	0.632455	-0.421629	0.673296	0.915704
ENSG00000088882	CPXM1	11283.3	0.985984	0.370211	2.6633	0.00773782	0.0941182
ENSG00000088888	MAVS	2230.41	0.0675416	0.476546	0.141731	0.887292	0.973956
ENSG00000088899	LZTS3	456.77	-0.732069	0.498226	-1.46935	0.141738	0.525794
ENSG00000088926	F11	0	NA	NA	NA	NA	NA
ENSG00000088930	XRN2	9806.86	0.397626	0.33407	1.19025	0.233949	0.646746
ENSG00000088970	KIZ	653.229	-0.250883	0.418207	-0.599902	0.548572	0.867108
ENSG00000088986	DYNLL1	2853.37	-0.82431	0.337635	-2.44143	0.0146294	0.141433
ENSG00000088992	TESC	1019.17	-1.67197	0.567014	-2.94872	0.00319089	0.0508993
ENSG00000089006	SNX5	3563.96	-0.00768559	0.384342	-0.0199967	0.984046	0.996781
ENSG00000089009	RPL6	13043.9	0.637226	0.402837	1.58185	0.113685	0.467051
ENSG00000089012	SIRPG	65.3006	-4.87644	1.5618	-3.12231	0.00179436	0.0338399
ENSG00000089022	MAPKAPK5	2565.42	0.60968	0.356492	1.71022	0.0872251	0.405043
ENSG00000089041	P2RX7	395.775	-1.28117	0.763902	-1.67714	0.0935156	0.421305
ENSG00000089048	ESF1	684.205	-0.550774	0.482701	-1.14103	0.253859	0.66677
ENSG00000089050	RBBP9	412.488	-0.441631	0.436896	-1.01084	0.312094	0.722902
ENSG00000089053	ANAPC5	9177.72	-0.41496	0.459823	-0.902435	0.366826	0.763696
ENSG00000089057	SLC23A2	1070.26	0.188593	0.477081	0.395306	0.692617	0.923064
ENSG00000089060	SLC8B1	3094.38	-0.0427674	0.404588	-0.105706	0.915816	0.982627
ENSG00000089063	TMEM230	7774.37	-0.103114	0.455556	-0.226347	0.820931	0.958806
ENSG00000089091	DZANK1	127.98	0.480212	0.637294	0.753517	0.451139	0.813908
ENSG00000089094	KDM2B	2032.88	-0.27162	0.412398	-0.658636	0.510129	0.847662
ENSG00000089101	CFAP61	0.790205	2.05328	3.46367	0.592805	0.553311	NA
ENSG00000089116	LHX5	0	NA	NA	NA	NA	NA
ENSG00000089123	TASP1	946.226	0.515651	0.440944	1.16943	0.242232	0.653807
ENSG00000089127	OAS1	513.076	-1.87242	0.613063	-3.05421	0.00225654	0.0398608
ENSG00000089154	GCN1	2385.42	-0.216024	0.439057	-0.492017	0.622708	0.8976
ENSG00000089157	RPLP0	75094.3	1.00898	0.367404	2.74625	0.00602806	0.0793668
ENSG00000089159	PXN	4586.46	-0.230697	0.438222	-0.526438	0.598584	0.887932
ENSG00000089163	SIRT4	8.56062	-4.24354	2.38723	-1.7776	0.0754693	NA
ENSG00000089169	RPH3A	0.887195	-2.27871	3.46559	-0.657524	0.510844	NA
ENSG00000089177	KIF16B	503.301	-1.2529	0.526684	-2.37885	0.0173667	0.1589
ENSG00000089195	TRMT6	1209.96	-0.393262	0.496901	-0.791429	0.428694	0.800187
ENSG00000089199	CHGB	9.56095	0.630491	2.79957	0.22521	0.821816	NA
ENSG00000089220	PEBP1	18874.8	0.540765	0.370147	1.46095	0.14403	0.529733
ENSG00000089225	TBX5	4.03672	-1.33434	3.45419	-0.386295	0.699278	NA
ENSG00000089234	BRAP	4265.65	0.447315	0.382729	1.16875	0.242504	0.654142
ENSG00000089248	ERP29	5959.94	-0.375946	0.448081	-0.839013	0.401462	0.784529
ENSG00000089250	NOS1	0.176905	-1.02255	3.51179	-0.291175	0.770917	NA
ENSG00000089280	FUS	8297.45	-0.185714	0.368464	-0.504024	0.614244	0.894745
ENSG00000089289	IGBP1	1763.71	0.603327	0.425536	1.4178	0.156248	0.549658
ENSG00000089327	FXYD5	10292.9	0.458604	0.382719	1.19828	0.230808	0.64297
ENSG00000089335	ZNF302	1037.78	-0.0205074	0.534541	-0.0383646	0.969397	0.993901
ENSG00000089351	GRAMD1A	3615.2	0.331385	0.484087	0.684556	0.493624	0.839116
ENSG00000089356	FXYD3	52.93	-0.971705	0.99529	-0.976303	0.328914	0.737049
ENSG00000089472	HEPH	172.142	-2.83416	1.40801	-2.01289	0.0441265	0.276342
ENSG00000089486	CDIP1	1537.43	-0.257341	0.456991	-0.563119	0.573354	0.877332
ENSG00000089505	CMTM1	52.6513	-0.548753	0.868314	-0.631976	0.527403	0.858216
ENSG00000089558	KCNH4	31.8563	0.893387	1.34375	0.664845	0.50615	0.845312
ENSG00000089597	GANAB	8413.75	-0.514562	0.429348	-1.19847	0.230733	0.64297
ENSG00000089639	GMIP	3863.03	-0.105147	0.430153	-0.244441	0.806889	0.955061
ENSG00000089682	RBM41	624.732	0.45191	0.428365	1.05496	0.291441	0.701974
ENSG00000089685	BIRC5	2713.19	-0.377477	0.561524	-0.672237	0.501433	0.842885
ENSG00000089692	LAG3	2480.25	-0.456868	0.777359	-0.587718	0.556722	0.870681
ENSG00000089693	MLF2	16912.9	0.410426	0.333612	1.23025	0.218605	0.629313
ENSG00000089723	OTUB2	51.2842	-2.0806	1.60755	-1.29427	0.195574	0.606443
ENSG00000089737	DDX24	10834.4	0.0624217	0.362565	0.172167	0.863306	0.968864
ENSG00000089775	ZBTB25	530.592	0.378992	0.41255	0.918656	0.358276	0.758535
ENSG00000089818	NECAP1	3543.45	0.506343	0.478056	1.05917	0.289522	0.70044
ENSG00000089820	ARHGAP4	8767.27	0.119663	0.407505	0.293647	0.769028	0.945123
ENSG00000089847	ANKRD24	38.863	-4.80798	1.55138	-3.09915	0.00194076	0.0356171
ENSG00000089876	DHX32	1839.44	0.151163	0.36666	0.41227	0.680142	0.91777
ENSG00000089902	RCOR1	1239.99	0.177485	0.509791	0.348153	0.727725	0.932557
ENSG00000089916	GPATCH2L	2455.59	0.694173	0.403237	1.7215	0.0851597	0.401084
ENSG00000090006	LTBP4	3393.32	-0.11655	0.396948	-0.293616	0.769052	0.945123
ENSG00000090013	BLVRB	6131.05	-1.32461	0.604637	-2.19075	0.02847	0.212247
ENSG00000090020	SLC9A1	687.476	-0.15093	0.444853	-0.339281	0.734398	0.934251
ENSG00000090054	SPTLC1	3428.93	0.336449	0.421214	0.79876	0.42443	0.798253
ENSG00000090060	PAPOLA	8338.37	0.205815	0.369211	0.557446	0.577223	0.878502
ENSG00000090061	CCNK	327.547	0.269141	0.434273	0.619751	0.535422	0.861794
ENSG00000090097	PCBP4	341.755	-2.52113	1.01582	-2.48186	0.0130698	0.130711
ENSG00000090104	RGS1	3487.89	-0.93961	0.850666	-1.10456	0.269351	0.681665
ENSG00000090238	YPEL3	3674.27	-0.116182	0.345421	-0.33635	0.736607	0.935688
ENSG00000090263	MRPS33	664.578	-0.00539364	0.379665	-0.0142063	0.988665	0.99866
ENSG00000090266	NDUFB2	1616.58	-0.21583	0.49076	-0.439788	0.660091	0.910681
ENSG00000090273	NUDC	7557.9	-0.0091225	0.336785	-0.027087	0.97839	0.9946
ENSG00000090316	MAEA	3009.6	-0.19435	0.433528	-0.448299	0.653938	0.908804
ENSG00000090339	ICAM1	10711.3	-1.12856	0.766879	-1.47162	0.141123	0.52535
ENSG00000090372	STRN4	8050.62	-0.154036	0.335982	-0.458465	0.646619	0.906346
ENSG00000090376	IRAK3	3578.81	0.422017	0.435773	0.968432	0.332829	0.739445
ENSG00000090382	LYZ	42053.2	-1.95084	0.75907	-2.57004	0.0101686	0.111742
ENSG00000090402	SI	0	NA	NA	NA	NA	NA
ENSG00000090432	MUL1	3956.39	-0.0597402	0.360466	-0.165731	0.868369	0.970355
ENSG00000090447	TFAP4	36.7867	-0.530297	1.19723	-0.442938	0.657811	0.910397
ENSG00000090470	PDCD7	2065.53	0.480302	0.464917	1.03309	0.30156	0.711486
ENSG00000090487	SPG21	5822.48	-0.156527	0.424479	-0.368752	0.712313	0.929919
ENSG00000090512	FETUB	0	NA	NA	NA	NA	NA
ENSG00000090520	DNAJB11	3411.33	0.112962	0.376007	0.300425	0.763853	0.943821
ENSG00000090530	P3H2	673.561	-3.62133	1.33274	-2.7172	0.0065837	0.0842731
ENSG00000090534	THPO	10.7339	-0.876109	3.45054	-0.253905	0.799569	NA
ENSG00000090539	CHRD	48.1946	-5.18094	1.59416	-3.24996	0.00115421	0.0247418
ENSG00000090554	FLT3LG	3.57546	-0.37837	1.74067	-0.21737	0.82792	NA
ENSG00000090565	RAB11FIP3	1082.71	0.12422	0.480305	0.258627	0.795923	0.952959
ENSG00000090581	GNPTG	3389.42	-0.451421	0.453958	-0.99441	0.320023	0.729565
ENSG00000090612	ZNF268	1275.45	0.604882	0.347294	1.7417	0.0815607	0.391293
ENSG00000090615	GOLGA3	1257.16	-0.176401	0.383579	-0.459882	0.645601	0.905845
ENSG00000090621	PABPC4	2086.53	0.262394	0.365595	0.717719	0.472931	0.825793
ENSG00000090659	CD209	316.865	-3.93901	1.0546	-3.73506	0.000187672	0.00657229
ENSG00000090661	CERS4	704.975	0.013033	0.446135	0.0292131	0.976695	0.994395
ENSG00000090674	MCOLN1	2739.57	-1.9033	0.742302	-2.56405	0.010346	0.112815
ENSG00000090686	USP48	2787.19	-0.266612	0.360356	-0.739857	0.459387	0.818497
ENSG00000090776	EFNB1	2867.61	-0.521481	0.540831	-0.964222	0.334934	0.740882
ENSG00000090857	PDPR	614.329	0.824852	0.571401	1.44356	0.148863	0.53739
ENSG00000090861	AARS	2447.55	-0.728325	0.529685	-1.37502	0.169126	0.570664
ENSG00000090863	GLG1	5669.44	-0.6988	0.49679	-1.40663	0.159537	0.556091
ENSG00000090889	KIF4A	366.209	-1.66787	0.967975	-1.72305	0.0848796	0.400855
ENSG00000090905	TNRC6A	650.919	0.014608	0.435304	0.0335582	0.973229	0.994014
ENSG00000090924	PLEKHG2	544.81	-0.697446	0.49684	-1.40376	0.160389	0.557687
ENSG00000090932	DLL3	5.31191	-1.71356	3.21206	-0.533476	0.593704	NA
ENSG00000090971	NAT14	928.26	1.07511	0.400043	2.68748	0.00719927	0.0893233
ENSG00000090975	PITPNM2	254.88	0.591011	0.473614	1.24788	0.212076	0.622999
ENSG00000090989	EXOC1	1639.46	0.145191	0.443307	0.327518	0.743276	0.938786
ENSG00000091009	RBM27	272.252	-0.266015	0.483979	-0.549642	0.582565	0.880747
ENSG00000091010	POU4F3	0.441955	-1.13649	3.48453	-0.326153	0.744309	NA
ENSG00000091039	OSBPL8	6330.6	0.318974	0.43764	0.728851	0.466093	0.821647
ENSG00000091073	DTX2	492.201	-0.855686	0.468217	-1.82754	0.0676182	0.354006
ENSG00000091106	NLRC4	281.675	-4.32661	0.824063	-5.25034	1.52e-07	2.95e-05
ENSG00000091127	PUS7	839.09	-0.662437	0.435025	-1.52276	0.12782	0.499529
ENSG00000091128	LAMB4	7.19407	-0.0847781	2.08331	-0.0406939	0.96754	NA
ENSG00000091129	NRCAM	38.2391	2.37138	2.27899	1.04054	0.298089	0.708359
ENSG00000091136	LAMB1	557.292	-2.20199	1.11476	-1.97531	0.048233	0.293541
ENSG00000091137	SLC26A4	2.645	-1.00978	3.45446	-0.292312	0.770048	NA
ENSG00000091138	SLC26A3	0.823922	1.29802	3.48381	0.372585	0.709457	NA
ENSG00000091140	DLD	11640.3	0.608875	0.418835	1.45374	0.14602	0.533287
ENSG00000091157	WDR7	589.918	-0.454992	0.455649	-0.998557	0.318009	0.72817
ENSG00000091164	TXNL1	7955.01	0.581505	0.406931	1.429	0.153004	0.5437
ENSG00000091181	IL5RA	66.4643	-3.16227	1.24546	-2.53904	0.0111157	0.118659
ENSG00000091262	ABCC6	102.292	-0.27699	0.673742	-0.411122	0.680983	0.918335
ENSG00000091317	CMTM6	14301.8	-0.183668	0.436495	-0.420779	0.673916	0.915704
ENSG00000091409	ITGA6	1749.8	-0.835199	0.3834	-2.1784	0.0293762	0.216578
ENSG00000091428	RAPGEF4	41.4537	-2.97002	0.989716	-3.00088	0.00269198	0.0449844
ENSG00000091436	MAP3K20	2773.3	0.518834	0.359986	1.44126	0.14951	0.538486
ENSG00000091482	SMPX	0	NA	NA	NA	NA	NA
ENSG00000091483	FH	2038.42	-0.0344235	0.346381	-0.0993806	0.920836	0.984119
ENSG00000091490	SEL1L3	4116.52	-0.759744	0.688432	-1.10359	0.269773	0.681731
ENSG00000091513	TF	4383.37	-3.63235	1.12918	-3.21681	0.00129624	0.0268495
ENSG00000091527	CDV3	7869.38	-0.0276473	0.339182	-0.0815117	0.935035	0.987625
ENSG00000091536	MYO15A	21.2986	2.76399	2.1171	1.30555	0.191704	0.6024
ENSG00000091542	ALKBH5	6668.55	-0.27359	0.340996	-0.802327	0.422364	0.796878
ENSG00000091583	APOH	0	NA	NA	NA	NA	NA
ENSG00000091592	NLRP1	2734.31	0.0929664	0.367828	0.252744	0.800466	0.953494
ENSG00000091622	PITPNM3	34.6555	-2.99902	1.48986	-2.01295	0.04412	0.276342
ENSG00000091640	SPAG7	3927.23	0.146482	0.335841	0.436163	0.662718	0.911807
ENSG00000091651	ORC6	670.218	-0.278731	0.51202	-0.544376	0.586183	0.882103
ENSG00000091656	ZFHX4	34.1248	-2.41245	2.06446	-1.16856	0.242579	0.654168
ENSG00000091664	SLC17A6	0	NA	NA	NA	NA	NA
ENSG00000091704	CPA1	4.86151	-1.23488	3.45234	-0.357693	0.720573	NA
ENSG00000091732	ZC3HC1	1074.85	0.29575	0.415337	0.712074	0.476419	0.828279
ENSG00000091831	ESR1	89.5165	-4.05494	1.17814	-3.44182	0.000577804	0.0149564
ENSG00000091844	RGS17	2.97826	2.11563	2.93402	0.721071	0.470866	NA
ENSG00000091879	ANGPT2	181.152	-1.88184	0.806142	-2.33438	0.0195756	0.17069
ENSG00000091947	TMEM101	755.36	0.0923645	0.443507	0.208259	0.835026	0.962169
ENSG00000091972	CD200	1821	-0.267123	0.457191	-0.58427	0.559039	0.871364
ENSG00000091986	CCDC80	1182.94	-3.52906	1.17157	-3.01224	0.00259324	0.0437778
ENSG00000092009	CMA1	7.12538	0.430195	3.38163	0.127215	0.89877	NA
ENSG00000092010	PSME1	14602.4	-0.198161	0.481956	-0.411159	0.680956	0.918335
ENSG00000092020	PPP2R3C	2248.77	-0.0745494	0.365928	-0.203727	0.838567	0.962515
ENSG00000092036	HAUS4	680.859	0.0376959	0.54043	0.0697516	0.944391	0.989846
ENSG00000092051	JPH4	207.219	-0.914473	0.961941	-0.950654	0.34178	0.745745
ENSG00000092054	MYH7	0.773422	-1.17866	3.47028	-0.339643	0.734125	NA
ENSG00000092067	CEBPE	362.114	-3.42684	0.813818	-4.21082	2.54e-05	0.00146898
ENSG00000092068	SLC7A8	641.513	-3.3339	0.690138	-4.83077	1.36e-06	0.00015478
ENSG00000092094	OSGEP	1430.38	-0.561608	0.357778	-1.56971	0.116482	0.472467
ENSG00000092096	SLC22A17	542.878	-1.63337	0.445812	-3.66382	0.000248483	0.00809287
ENSG00000092098	RNF31	826.588	-0.312484	0.546136	-0.572174	0.567204	0.875029
ENSG00000092108	SCFD1	3304.51	0.11137	0.483956	0.230124	0.817996	0.957833
ENSG00000092140	G2E3	1018.97	0.350877	0.463981	0.756232	0.44951	0.813242
ENSG00000092148	HECTD1	3373.52	0.110858	0.485057	0.228546	0.819222	0.958217
ENSG00000092199	HNRNPC	47342.9	0.465856	0.325162	1.43269	0.151947	0.542135
ENSG00000092200	RPGRIP1	64.5061	-0.956268	0.984061	-0.971757	0.331172	0.738165
ENSG00000092201	SUPT16H	5823.37	-0.0169164	0.427581	-0.039563	0.968442	0.993835
ENSG00000092203	TOX4	5488.07	0.481089	0.328458	1.46469	0.143006	0.528323
ENSG00000092208	GEMIN2	678.858	0.360851	0.405593	0.889686	0.373635	0.768277
ENSG00000092295	TGM1	9.26412	0.509953	2.60416	0.195822	0.844749	NA
ENSG00000092330	TINF2	4926.04	0.175493	0.370476	0.473697	0.635716	0.902158
ENSG00000092345	DAZL	3.09369	-1.22822	3.4544	-0.355553	0.722176	NA
ENSG00000092377	TBL1Y	0	NA	NA	NA	NA	NA
ENSG00000092421	SEMA6A	177.074	-2.53037	0.581107	-4.35439	1.33e-05	0.000904906
ENSG00000092439	TRPM7	1688.4	0.269021	0.363351	0.740389	0.459064	0.81824
ENSG00000092445	TYRO3	122.261	-1.71175	0.910203	-1.88062	0.0600233	0.334033
ENSG00000092470	WDR76	567.267	-0.10576	0.550137	-0.192243	0.847552	0.964623
ENSG00000092529	CAPN3	5.82958	-2.53469	1.88314	-1.34599	0.178306	NA
ENSG00000092531	SNAP23	3146.15	0.0822917	0.348604	0.23606	0.813386	0.95694
ENSG00000092607	TBX15	43.6119	-3.75093	1.75045	-2.14283	0.0321264	0.226636
ENSG00000092621	PHGDH	2706.38	-0.446264	0.561127	-0.7953	0.426439	0.799169
ENSG00000092758	COL9A3	100.898	-2.10053	0.94961	-2.212	0.0269669	0.205384
ENSG00000092820	EZR	30105.6	0.661757	0.524095	1.26267	0.20671	0.617472
ENSG00000092841	MYL6	33233.2	0.0741281	0.551104	0.134508	0.893001	0.976271
ENSG00000092847	AGO1	1372.44	-0.355956	0.550313	-0.646825	0.517745	0.851558
ENSG00000092850	TEKT2	31.032	1.84156	0.882218	2.08742	0.0368502	0.247359
ENSG00000092853	CLSPN	425.474	-0.475993	0.481501	-0.98856	0.322879	0.731287
ENSG00000092871	RFFL	1305.9	0.176981	0.435102	0.406757	0.684187	0.919753
ENSG00000092929	UNC13D	6070.24	-0.491511	0.537465	-0.914499	0.360455	0.759379
ENSG00000092931	MFSD11	918.713	-0.744515	0.420435	-1.77082	0.0765903	0.380015
ENSG00000092964	DPYSL2	2180.11	-1.77613	0.468989	-3.78715	0.000152384	0.00554689
ENSG00000092969	TGFB2	31.4348	-2.20357	1.66449	-1.32387	0.185546	0.593226
ENSG00000092978	GPATCH2	389.877	0.110909	0.426251	0.260197	0.794712	0.952908
ENSG00000093000	NUP50	3352.26	-0.0492406	0.523026	-0.0941457	0.924993	0.984851
ENSG00000093009	CDC45	1105.62	0.0217107	0.487113	0.04457	0.96445	0.993773
ENSG00000093010	COMT	7624.22	-0.285195	0.499674	-0.570763	0.568161	0.875044
ENSG00000093072	ADA2	3981.66	-1.61721	0.550574	-2.93732	0.00331065	0.0522787
ENSG00000093100	AC016026.1	6.29935	-2.40506	3.34802	-0.718351	0.472541	NA
ENSG00000093134	VNN3	35.1768	-5.69925	1.36553	-4.17365	3e-05	0.00165342
ENSG00000093144	ECHDC1	2046.74	-0.56238	0.435244	-1.2921	0.196322	0.606507
[truncated: 56,397 more rows]
