# Supplementary material for: Molecular profiling of pre- and post- 5-azacytidine myelodysplastic syndrome samples identifies predictors of response
Source: Front Oncol. 2024 Sep 23;14:1438052. doi: 10.3389/fonc.2024.1438052 (PMC11456566; doi:10.3389/fonc.2024.1438052)
Supplement: Supplementary Table 10 — List of B-lymphocyte genes expressed in pre- and post-treatment patient samples and healthy controls. [file Table10.xlsx]

## Sheet: Sheet1
Supplementary Table 10. List of B cell developmental genes differentially expressed between pre and post- AZA treatment MDS/AML patient samples and healthy controls
Gene	Mean healthy CD34+	Mean MDS/AML CD34+ Pre AZA	Mean MDS/AML CD34+ Post AZA	log2FoldChange_pre_vs_healthy	p. value	log2FoldChange_post_vs_healthy	p. value																														pre_P1	pre_P2	pre_P4	pre_P7	pre_P9	pre_P10	pre_P13	pre_P3	pre_P5	pre_P6	pre_P8	pre_P14	pre_P11
CD24	4065.58	330.424	2629.01	-3.62107	8.99344e-05	-0.628941	0.373493																														50.8443	36.307	201.945	416.844	6.21782	122.838	843.606	463.9	57.4209	91.9086	77.3645	1367.2	856.287
LRIG1	3738.12	469.531	798.511	-2.99302	0.000345557	-2.22693	0.00191467																														118.268	197.268	162.793	1337.81	529.292	643.593	227.451	35.5902	618.71	973.935	50.2869	1176	55.047
RIMS3	1807.37	89.4075	239.703	-4.33735	0.00035216	-2.91457	0.00202514																														44.2125	0	90.6692	80.7635	7.77228	240.449	88.2646	0	0	78.5671	71.5621	299.976	88.25
VPREB3	3576.61	151.273	218.615	-4.56336	0.000397015	-4.03213	0.00063891																														11.0531	9.68186	12.364	41.6844	1.55446	11.7611	20.3688	30.6812	22.9684	29.6479	3.86822	1828.7	93.4926
LEF1	5425.96	388.429	821.872	-3.80416	0.000427613	-2.72289	0.00145903																														0	2.42047	127.761	2.60527	31.0891	77.7539	314.018	164.451	89.0024	40.0247	2113.98	2390.74	82.1337
BACH2	2928.52	265.854	258.89	-3.46147	0.000605795	-3.49976	0.000667831																														6.63187	484.093	2.06066	240.988	699.505	196.018	339.479	196.36	239.732	238.666	119.915	892.51	55.9208
CD79B	14485	1963.81	2849.89	-2.88283	0.000704035	-2.34558	0.00425529																														2174.15	1573.3	1339.43	475.462	694.065	2997.77	1351.13	559.625	1248.9	1045.09	244.665	9048.72	3840.19
POU2AF1	3184.54	129.746	526.8	-4.61732	0.000707195	-2.59576	0.00496179																														13.2637	0	30.91	33.8686	6.21782	12.4145	6.78959	0	89.0024	22.236	1.93411	1190.01	409.795
IGHM	88968.8	32656.6	52764.7	-1.44592	0.00179102	-0.753727	0.165247																														12141.8	117959	17495	21244.7	56333.5	17416.9	16042.1	71316.6	3571.58	5195.8	23638.7	47790.9	27363.6
ZFP36L2	263541	129078	118672	-1.02978	0.00224681	-1.15105	0.00247215																														69657.8	260950	124057	199026	153838	140819	61284.5	240313	60498.7	130246	166530	94494	34710.2
P4HA2	576.433	150.078	237.829	-1.94144	0.00279726	-1.27723	0.0636716																														71.8452	58.0912	187.52	487.186	10.8812	164.002	171.437	52.7716	58.8564	192.712	43.5175	389.804	112.715
VPREB1	8653.12	478.341	885.144	-4.17711	0.00283513	-3.28924	0.00654639																														165.797	55.6707	163.823	57.316	3.10891	364.594	20.3688	9.81798	80.3892	174.923	410.032	3188.48	1885.58
DNTT	46819.8	6475.83	6297.7	-2.85398	0.00344321	-2.89422	0.00340329																														2519	7119.8	7911.92	151.106	302.342	867.707	208.78	1006.34	289.975	621.124	17.407	31435.6	35612.8
COL5A1	5024.98	972.948	1479.29	-2.36868	0.0052365	-1.76422	0.0163658																														2013.88	733.401	43.274	195.395	9.32674	2297.33	157.858	2065.46	4173.06	260.902	348.14	1016.95	197.47
MME	5154.99	675.982	490.446	-2.93091	0.00529262	-3.3938	0.00103947																														30.9487	73.8242	70.0626	0	7309.05	137.213	174.832	6.13624	25.8394	7.41199	59.9575	1302.92	259.507
IGLL1	25769.2	10169.8	9917.66	-1.34135	0.00976168	-1.37758	0.00863641																														8491	1052.9	8192.17	2676.92	997.961	13513.5	220.662	3587.24	991.946	23254.4	8333.12	19976.4	35097.3
PAX5	1693.54	20.2062	37.4652	-6.3891	0.0104014	-5.49835	0.0113091																														2.21062	0	26.7886	0	0	0	0	0	0	5.92959	0	177.183	70.7748
LTB	4088.9	1387.89	2369.45	-1.55882	0.0193071	-0.787164	0.266047																														54.1603	927.038	259.644	71.645	2470.03	725.921	414.165	3090.21	584.258	289.067	5264.65	3094.53	2139.84
AKAP12	5949.82	1402.09	1526.73	-2.08526	0.0236454	-1.9624	0.0141453																														252.011	14.5228	166.914	1916.18	229.282	30.7095	13175.2	22.0905	166.521	610.748	348.14	2333.05	255.139
CDK9	11139.2	6485.15	5074.44	-0.780436	0.0319812	-1.13433	0.00204555																														1933.19	10882.4	4172.85	7593.07	7002.82	4209.16	7168.11	13385.6	4371.17	4834.1	10204.4	7261.22	3833.2
QRSL1	2735.24	1859.64	1982.37	-0.556643	0.0859863	-0.464441	0.0685235																														2272.52	1406.29	1706.23	828.477	1856.8	2355.48	716.301	789.12	2312.63	2484.5	1382.89	3884.85	1648.79
BLNK	1970.59	738.764	895.335	-1.41544	0.0915154	-1.13813	0.128417																														15.4744	110.131	801.599	2.60527	50.5198	503.767	407.375	109.225	1.43552	68.1903	9.67056	3735.69	4493.76
LPL	1425.19	463.334	2576.49	-1.62103	0.101096	0.854259	0.642782																														123.795	14.5228	393.587	239.685	18.6535	150.281	3662.98	19.636	5.74209	17.7888	17.407	303.272	1481.03
EPAS1	1703.03	504.05	1723.1	-1.75647	0.123254	0.0169034	0.988803																														33.1593	9.68186	455.407	435.081	183.426	39.2036	4307.99	284.721	221.07	160.099	69.628	412.054	382.708
FABP4	8830.79	2361.99	5485.93	-1.90254	0.123358	-0.686807	0.510465																														3257.35	26.6251	983.967	2568.8	38.8614	615.497	20137.9	277.358	63.163	170.476	129.585	1218.86	3339.52
SPARCL1	1199.84	379.199	749.353	-1.66182	0.149497	-0.679128	0.524397																														90.6355	0	136.004	487.186	4.66337	0	3510.22	355.902	17.2263	2.96479	17.407	135.978	536.49
BTG1	21182.8	12351.3	10388.6	-0.778225	0.150536	-1.02789	0.0200617																														10092.6	9146.94	15684.7	29365.3	13913.9	4063.46	45011.6	8763.77	3074.89	7134.78	4986.14	7922.16	8055.22
NNMT	942.066	361.819	1912.07	-1.38056	0.160133	1.02124	0.643789																														96.1621	4.84093	669.716	132.869	3.10891	109.77	2690.37	17.1815	8.61313	8.89438	5.80234	182.128	1095.7
HSPA1B	1005.7	2264.15	1370.99	1.17076	0.169	0.447016	0.424374																														4577.09	1196.92	1568.17	7324.73	1472.07	5161.16	2826.17	846.801	1649.42	1305.99	1906.07	637.86	826.579
IGHG3	16104.8	5541.93	44898.1	-1.53903	0.18222	1.47916	0.593837																														168.007	181.535	3511.37	1064.25	79.2773	257.437	6276.97	1735.33	288.54	996.171	808.459	958.439	59972.4
NR4A1	5499.83	12335.8	9640.84	1.16539	0.20185	0.80977	0.226276																														7816.76	2041.66	34093.7	15916.9	32028.8	652.087	9994.27	4688.09	26472.5	8719.46	21532.5	688.131	6749.82
ISG20	3444.08	2025.05	1796.78	-0.766159	0.203494	-0.938705	0.032046																														1811.61	1171.51	947.906	2280.92	2341.01	669.729	9525.79	682.35	249.781	4172.95	510.606	1329.29	1564.04
CRIM1	1080.04	666.384	695.218	-0.696661	0.220368	-0.635549	0.243542																														263.064	586.963	1313.67	794.608	2554.75	201.899	886.041	112.907	321.557	539.593	563.794	598.303	251.644
STAG3	876.335	369.301	469.383	-1.24669	0.223234	-0.900718	0.329797																														211.114	110.131	628.503	99.0004	91.7129	37.8968	139.187	119.043	30.146	71.1551	164.399	70.8734	3273.11
CD14	5778.63	2412.33	7978.09	-1.2603	0.271793	0.465317	0.663521																														214.43	26.6251	624.381	1044.71	74.6139	177.723	19603.2	5861.33	34.4525	65.2255	359.745	3183.53	2291.01
FCN1	33193.9	12965.9	13356.4	-1.3562	0.286692	-1.31339	0.109057																														970.463	94.3981	1277.61	578.371	310.114	662.541	139781	14588.3	358.881	481.779	404.229	11624.9	9322.17
GEM	131.594	471.946	656.526	1.84253	0.288172	2.31876	0.461342																														259.748	14.5228	927.299	1395.12	481.104	35.9367	483.758	2.45449	35.8881	2632.74	133.454	80.7627	82.1337
CXCR4	24631.5	17412.9	16914.2	-0.500347	0.30385	-0.54227	0.124522																														9232.67	34676.8	30524.6	6484.53	18110.2	4804.4	58354.8	10387.4	5133.43	17929.6	8111.66	13396.7	23643.1
SKIL	3087.93	2101.7	1826.5	-0.55508	0.304151	-0.757555	0.147026																														1808.29	1449.86	1783.51	1969.59	1322.06	267.891	5122.74	3739.42	4276.42	1688.45	2548.19	1942.42	416.785
PDE4B	6622.82	10445.1	7923.65	0.657304	0.373454	0.25872	0.549961																														4662.2	19554.9	29161.5	31140.8	4717	4299.33	5051.45	15616.7	4109.9	7760.35	4384.63	1433.13	12500
SSBP2	6413.97	5302.27	5035.19	-0.274607	0.387082	-0.34917	0.331856																														4690.94	9062.22	6771.34	3296.97	7604.4	6990.01	1327.36	6483.55	3812.75	4346.39	2216.49	6914.27	8826.75
ID3	1957.32	1313.19	1075.79	-0.575798	0.416718	-0.863485	0.189031																														121.584	837.481	92.7299	518.449	300.01	159.428	5156.69	3036.21	2469.1	3116	29.0117	1792.44	685.03
CRHBP	5048.48	3676.07	6011.37	-0.457685	0.459882	0.251846	0.775664																														8664.54	13831.7	1609.38	7722.03	392.5	868.36	5913.73	3382.29	252.652	5158.74	868.416	656.815	654.448
CCL20	22.6001	62.8493	46.3789	1.47557	0.467917	1.03714	0.598093																														23.2115	0	45.3346	484.581	0	0	147.674	2.45449	5.74209	106.733	9.67056	52.743	1.74753
PPFIBP1	1055.9	1355.05	888.161	0.359872	0.471251	-0.24958	0.502706																														822.352	438.104	912.874	2787.64	2369.77	978.131	1941.82	2906.12	2306.88	1111.8	773.645	721.095	416.785
NR4A2	5204.74	10160.5	5678.4	0.965074	0.53191	0.125659	0.854923																														1097.57	873.788	53591.7	3672.13	53331.1	1218.58	5190.64	1778.28	8887.32	1285.24	5675.65	1039.2	3675.92
ID1	2345.93	3595.34	2519.66	0.615967	0.551319	0.10307	0.930748																														715.137	1464.38	696.505	13371.6	292.238	186.217	6511.21	6352.23	13595.8	4021.74	606.344	925.474	376.592
NR4A3	1000.55	1472.14	608.41	0.557126	0.666731	-0.717677	0.376665																														143.69	82.2958	8211.75	1060.35	4337.71	44.4308	4292.72	233.177	687.615	630.019	533.815	102.19	168.636
CD9	8324.22	6792.49	5516.1	-0.293374	0.675681	-0.593666	0.136644																														22122.8	803.594	521.348	8837.09	27775.8	867.707	11313.2	5628.16	1277.61	2116.86	4970.67	3524.71	3229.43
HES1	381.456	503.894	286.202	0.401605	0.719164	-0.414481	0.539867																														97.2674	355.808	74.1839	62.5266	127.465	66.6462	2269.42	1067.71	2209.27	50.4015	9.67056	598.303	43.6881
C6orf62	8376.06	8787.05	8417.37	0.0691063	0.74948	0.00709766	0.978154																														9518.94	5551.34	7953.14	16079.7	9625.97	6549.62	13221	8444.69	7893.94	7520.2	10515.8	6451.95	9143.93
TCF4	15473.6	13316.2	7573.02	-0.216628	0.754155	-1.03087	0.0083969																														6928.09	7888.3	14993.4	62362.4	5587.49	5062.5	7679.02	13433.5	2883.96	26659.4	6428.02	13339	5942.46
CAV1	312.856	392.939	898.937	0.328806	0.77694	1.52272	0.394524																														48.6337	0	88.6086	57.316	2040.22	103.236	1598.95	0	766.569	41.5071	90.9033	319.754	297.079
RGS1	3628.81	3132.08	4775.83	-0.212373	0.791586	0.396257	0.60047																														2565.43	3324.51	5409.24	1940.93	4063.35	501.806	15246	1840.87	3192.6	788.635	266.907	1457.85	2904.39
HLA-DQB1	9128.92	7949	6021.75	-0.19967	0.81883	-0.600261	0.413997																														14005.4	484.093	33069.5	20124.4	79.2773	3909.26	9120.11	1925.55	3534.26	3621.5	158.597	979.041	15728.6
HLA-DQA1	2865.25	3020.41	2648.69	0.0760821	0.9319	-0.113383	0.866165																														3027.45	228.734	6770.31	3627.84	42.7475	571.72	14424.5	946.208	2039.88	1986.41	63.8257	1378.73	4945.5
[truncated: 1 more columns]
